# Supplementary material for: Sensory genes identification with head transcriptome of the migratory armyworm, Mythimna separata
Source: PubMed Central journal article supplement (PMC5384095; doi:10.1038/srep46033), 2017-04-07
Supplement: srep46033-s1.pdf [file srep46033-s1.pdf]

# **Sensory genes identification with head transcriptome of the migratory armyworm, *Mythimna separata***

Zhenxing Liu, Xiaoyun Wang, Chaoliang Lei, Fen Zhu

## **Supplementary of Contents**

|                              |            |
|------------------------------|------------|
| <b>Title Page</b>            | pg. 1      |
| <b>Figure S1</b>             | pg. 2      |
| <b>Figure S2</b>             | pg. 3      |
| <b>Figure S3</b>             | pg. 3      |
| <b>Figure S4</b>             | pg. 4      |
| <b>Figure S5</b>             | pg. 5      |
| <b>Table S1</b>              | pg. 6      |
| <b>Supplementary Data S6</b> | pg. 7-27   |
| <b>Supplementary Data S7</b> | pg. 28-275 |
| <b>Supplementary Data S1</b> | *          |
| <b>Supplementary Data S2</b> | *          |
| <b>Supplementary Data S3</b> | *          |
| <b>Supplementary Data S4</b> | *          |
| <b>Supplementary Data S5</b> | *          |

\* submitted as separate excel file.

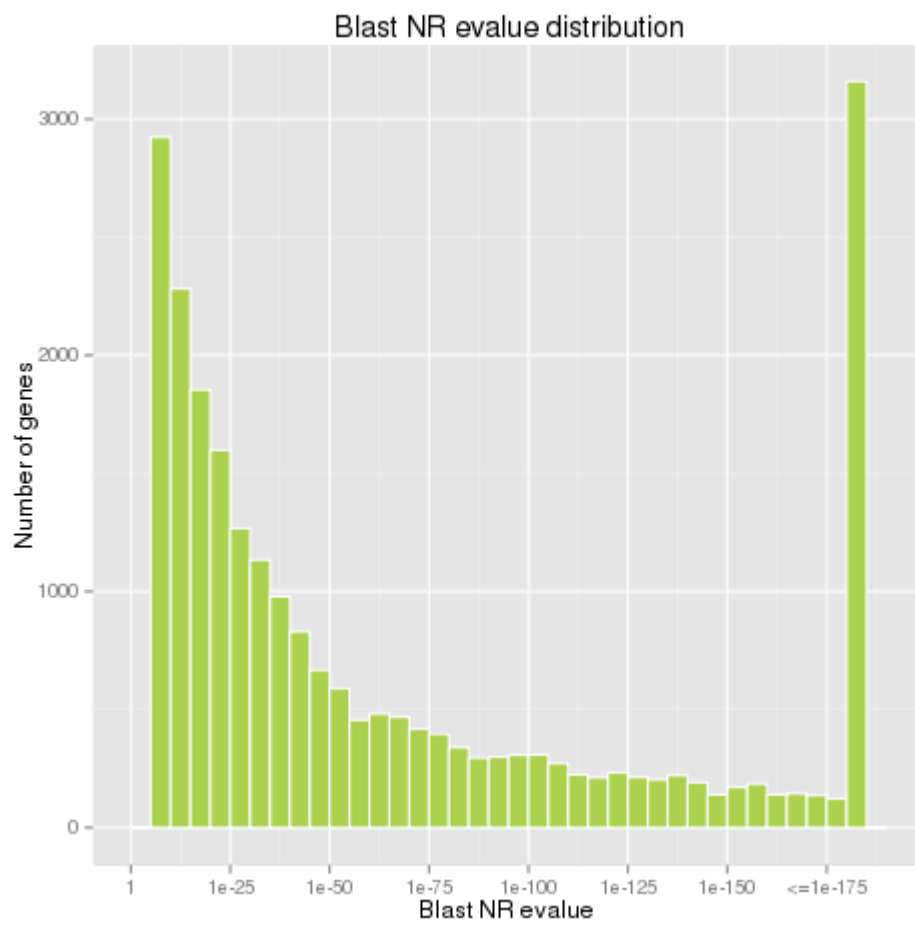

**Figure S1. Blast NR evalule distribution of the *M. separata* transcriptome.**

### Species classification

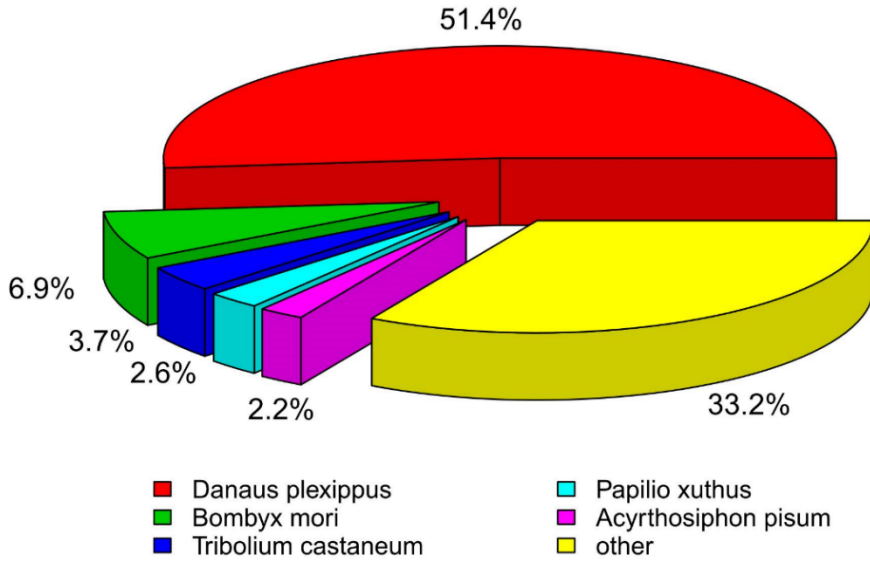

**Figure S2.** The BLASTx annotations of *M. separata* transcriptome species distribution.

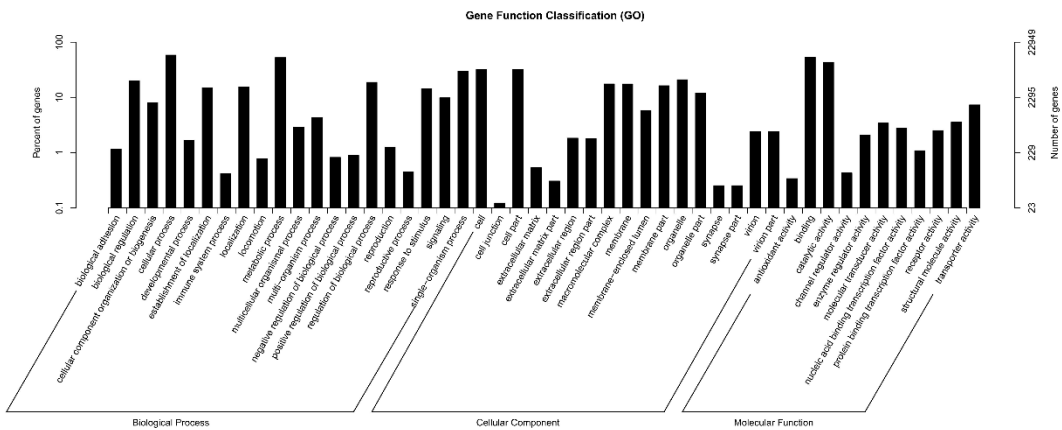

**Figure S3.** Gene Ontology (GO) results. GO analysis of 22,949 genes in *M. separata*, according to their involvement in biological processes, molecular function, or role as a cellular component.

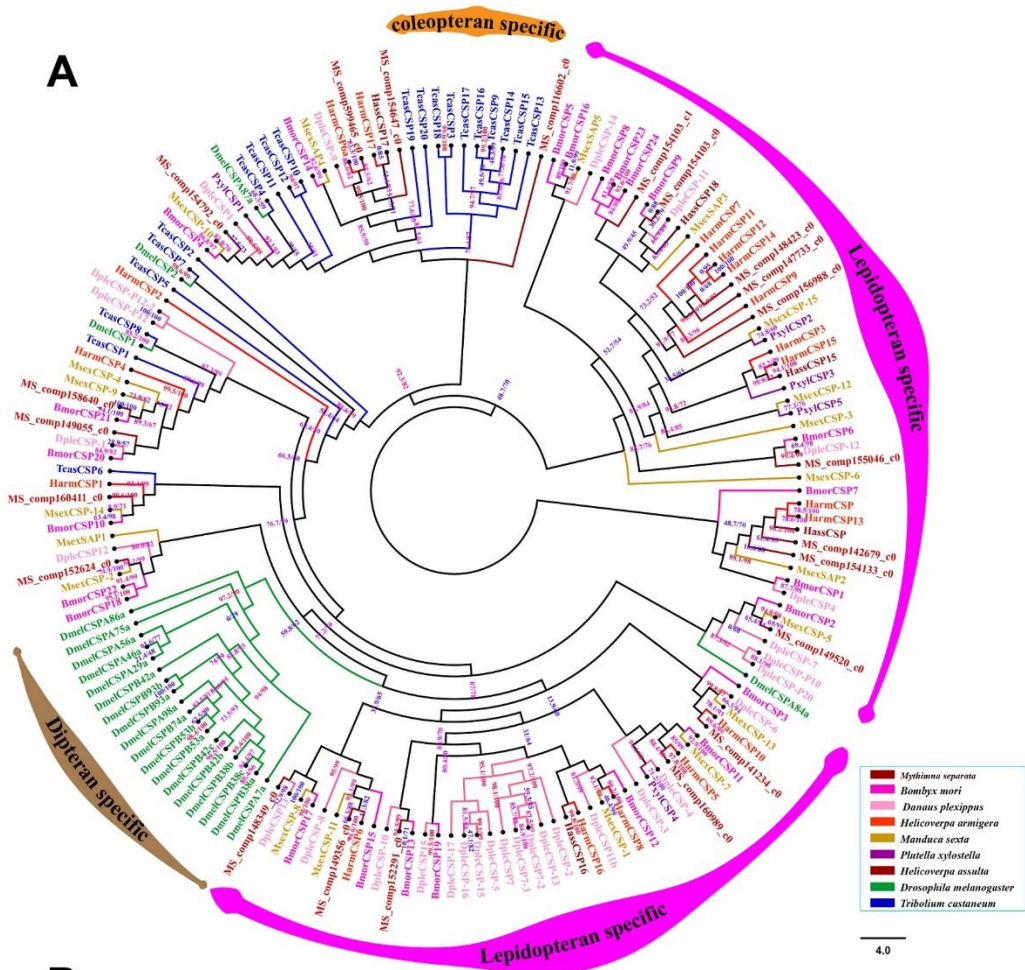

**Figure S4. ML CSPs and Alignment of the CSP sequences of *M. separata*.**

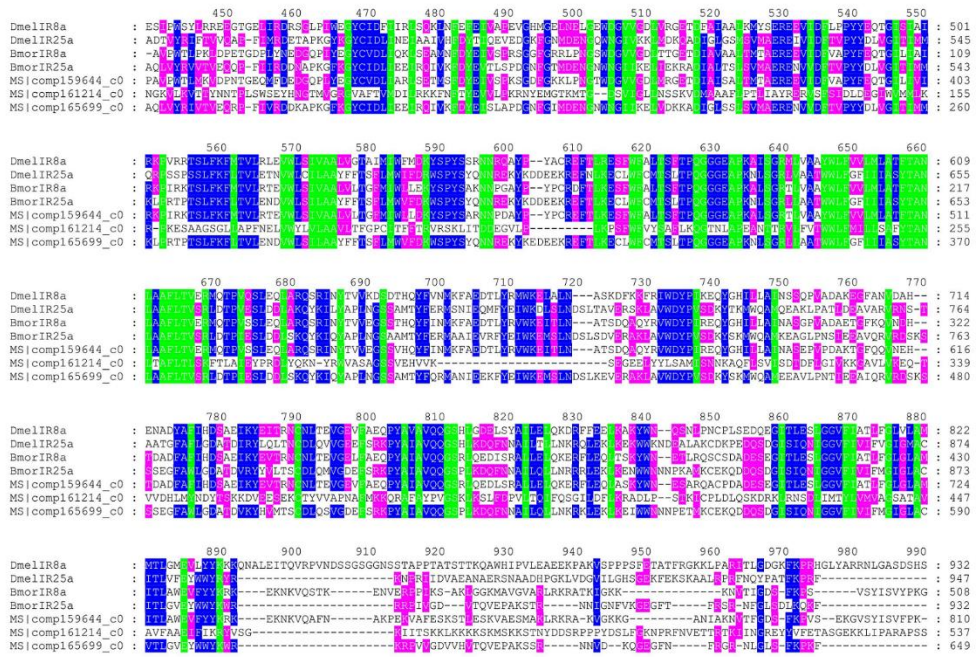

**Figure S5. Alignment of the IR sequences of *M. separate*.**

**Table S1. Component of mixed heads from *M. separata* in different life stages**

| <b>Stages</b>       | <b>Duratio<br/>n (d)</b> | <b>Frequency</b> | <b>Sample-<br/>day counts</b> | <b>12:00<br/>AM</b> | <b>12:00<br/>PM</b> | <b>Number of<br/>heads</b> |
|---------------------|--------------------------|------------------|-------------------------------|---------------------|---------------------|----------------------------|
| 1st instar<br>larva | 6                        | Every 2<br>days  | 2                             | 5                   | 5                   | 30 *                       |
| 2nd instar<br>larva | 3                        | Every 2<br>days  | 2                             | 6                   | 6                   | 24 *                       |
| 3rd instar<br>larva | 3                        | Every 2<br>days  | 2                             | 6                   | 6                   | 24 *                       |
| 4th instar<br>larva | 3                        | Every 2<br>days  | 2                             | 5                   | 5                   | 20 *                       |
| 5th instar<br>larva | 3                        | Every 2<br>days  | 2                             | 4                   | 4                   | 16 *                       |
| 6th instar<br>larva | 6                        | Every 2<br>days  | 3                             | 2                   | 2                   | 12 *                       |
| Female<br>pupa      | 10                       | Every 3<br>days  | 3                             | 2                   | 2                   | 12 *                       |
| Male pupa           | 10                       | Every 3<br>days  | 3                             | 2                   | 2                   | 12 *                       |
| Female<br>adult     | 5                        | Every 2<br>days  | 3                             | 2                   | 2                   | 12 *                       |
| Male adult          | 5                        | Every 2<br>days  | 6                             | 2                   | 2                   | 12 *                       |
| <b>Total</b>        | -                        | -                | -                             | -                   | -                   | 174 *                      |

\* indicates Sampling procedure in the table were repeated for three times.

## Supplementary Data S6. The Sensory Protein Fasta Sequences of *M. separate*.

### 1. Opsin protein fasta sequences of *M. separate*

Complete ORF:

>MS|comp149511\_c0

MSLSLDPGGIAALQAWGGQVAAYGASNQTVVDKVPDMLHMVDPHWYQFPPMNPLW  
HGLLGFTIGCLGFISITGNMGVIYIFMSTKSLKTPSNLLVVNLAFSDFLMMCCMSPAMVVN  
CYNETWVWGPLACELYACAGSLFGCASIWTMTMIAFDRYNVIVKGIAAKPMTNNGALLR  
ILGIWVFLAWTLAPFFGWNRYVPEGNMTACGTDYLSKDWFSRSYILIYSVFVYFMPLLLI  
IYSYFFIVQAVAAHEKGMREQAKKMNVASLRSEEAANTSAECKLAKVALMTISLWFWMAW  
TPYLVINYTGVFESAPISPLATIWGSLFAKANAVYNPIVYGISHPKYRAALYQRFPSLSCQAS  
PDESGSVASGATAVSEEKPA-

>MS|comp158503\_c0

MAENGPMAALQAWGGQAAVYGAANHTVVDKVPADMLHMVDAHWHYQFPPMNPLWH  
ALLGFTIGVLGFISITGNAMVIYIFMTAKNLKTPSNLLVVNLAFSDFLMMVAMAPAMVINC  
YNETWVFGPFACELYGCAGSLFGCTSIWTMTMIAFDRYNVIVKGIAAKPMTKTGALQRIL  
GIWLFSLAWTLAPFFGWNRYVPEGNMTACGTDYLSKDWLSRSYIIVYSVFVYFPLLLLIY  
SYYFIVQAVTAHEKAMRDQAKKMNVASLRSEEAANTSAECKLAKVALMTISLWFWMAWTP  
YLVINYTGVFESAPISPLATIWGSLFAKANAVYNPIVYGISHPKYRAVLYQKFPALACTVSP  
DEAGSIATNATVVADEKSEKPA-

>MS|comp163867\_c0

MATNYTEDIGPMAYPLKMVSKEVVEHMLGWNIPPEEHQDLVHDHWRNFPVANKYYHYVL  
ALIYTMLMVTSLGNGIWIWIFGTSKSLRSPSNMFVINLAVFDMMMMLEMPLLMNSFYQ  
RMVGYQLGCDIYAVLGSLSGIGGAITNAVIAFDRYKTISCPLDGRINRVQAFILIAFTWFWA  
LPFTILPALKVWGRFVPEGFLTTCSEFDYFTDDQDTKVFVVCIFVWSYAIPMTLICFYFSQLF  
GAVRMHERMLSDQAKKMNVKSLAANKEDASRSVEIRIAKVAFTIFFLVCAWTPYAFVT  
MTGAFGDRNLLTPIATMVPVAVCCKVVSCIDPWVYAINHPRYRAELQKRLPVMGVRESDP  
DSVSTTTSVATAQSTAQPAAEA-

>MS|comp164210\_c1

MYNQ TENSYYDAHFAPFKSGGPGSGVEMLGEGLTGDELA AVPEHWLSFPAPPASAHTALAL  
LYIFFTAAALVGNGLVIFIFSTTKSLRTSSNLLILQLAILDFIMMAKAPIFYNSAMRGFASGT  
FGCQLFALMGAYSIGAGMTNACIAYDRHSTITRPLDGRLSRGKVLLMIAFVWIYSTPWA  
LLPLFKIWGRYVPEGYLTCTFDYLTNTFTDKL FVACIFACSYVFPMSMIIFYSGIVKQVFA  
HEAALREQAKKMNVESLRANQNASAESA EIRIAKAALTVCFVAVSWTPYGV MALIGAF  
GNQQLLTPGVTMIPAVACKAVACVDPWVY AISHPKYRQELQRRMPWLQIQEPDDSVSTAT  
SNTVSSAPPAAPA-

>MS|comp165164\_c0

MQTLFEDLEDECPWYYFDGSYKLLLGACLFIFGVFGVLLNGWLFATFIHSHLLVFRSHILV  
LNLCTASLGRNLVGFAGSSAVAKRWLFGPSCCQLFAFLNQFFGVFQMTALFVAVLERYL  
LANYYRRERTLYTRFYWSLVGLSWFNSVIFSTPPLFGYGKYSCDSTGTTCTFLWPSTHSGA

KHIGFSIPYILVCGVIPVIAVFYYMGKAVRLERIFYKGEVQKEQTRLTQTIHAVCVATLALWI  
PAAILVGWQWLPLLIYGYRPHVPPALAVIAPIASEAATSVPVLCFIAGDERLRAALLGRMR  
KHYALLQPERAKRYNRA-

Incomplete ORF:

>MS|comp156702\_c0

LDDLKQWKRRRRSADNFKKLNDESGILKVTVGAVKELASYQNSVDIVETTALSVDNK  
LALIAKFIERWPVERWRSGLFSDDYLLRINSHWLEFPPPDSWIQYTLGSTYVLLAGTGAF  
GNVLVLLMYIRCSLRTPGNILVANLALSDFLMLAKTPIFIFNSFNLGPALGKTGCVIYG  
GGLTGTTSIATLSAIALDRYWAVVRPLEPLRALTAIRARLLAIGAWLYACIFAIIPALNIGYGS  
YVPEGYLTSCSFDYLTEDFSRPFIFVFFCAAWLAPFCTITFCYISIFRVVFNRSMSYGNQD  
QRLSSRHVKERTKRKAEIKLAFLVMAVIALFFISWTPYAVVALLGITGRKDLVTPITSMIPAL  
FCKTAACINPFYIITHPKFRKEFKKMLYRDKSKRMRGTLRTTDYCTDTRMHRPSKDLSD  
TDVEIVEMKDIPYQTDEKRDVKIKTISSKVAERQDSQTSMTIKSLQDSVSPPSWYMKPQ  
FKKRSFHRRSTRTNSSQTSTSDPII-

>MS|comp41007\_c0

VESLRANQNAGAESAERIKAALTVCFVSWTPYGVMLIGAFGNQQLTPGVTMIPA  
VACKAVACIDPWVYAISHPKYRQELQRRMPWLQIQEPDDTASTATSNTVSSAPAAAPA-

>MS|comp44349\_c0

ENSYDAHFAAYKSGGAGDTEMLGAGLTGEDLAMVPEHWLSFPAPPASAHTALALLYIFF  
TAAALVGNGLVIFISTTKSLRTSSNLLILQLAILDFIMMAKAPIFIYNSAMRGFATGTGFCQ  
LFALMGAY

## 2. CSP protein fasta sequences of *M. separata*

Complete ORF:

>MS|comp116602\_c0

MKTLFILCALVVAVCARPEEQYTTEYDNIDIDEILNNDRLFKSYFECLVGEGKCTPAGKELK  
SHMPDALQTECSKCSPKQKEGTTKVMKFLINNKPEQWKRLCAKYDPEGKYASKYEKEL  
KEVSQ-

>MS|comp141234\_c0

MRVLIVLSCLVVLAAFAEKYNAKYDNFDVETLISNDRLLKAYINCFLDKGRCTPEGSDFK  
KTLPEAIETTCAKCTEKQKGNIRKVIKAIQQKHPKEWDDLKKNPSGKNRANFDKFIQG  
SR-

>MS|comp148349\_c0

MKTWLLCLCVLTVVVCYSQGNRYENFNADAIQNDRILLAYYKCVMDKGPCTRDGKN  
FKRVLPELATAACGRCNPAQKTIVRKLKLLGIRTKSEPRFLELLDKYNPDRSNRDALYTFLLT  
GQ-

>MS|comp149055\_c0



MQIKYALLCCVAAVSLAQTQRPAVSDTALDDALQDKRFIQRQLKCALGEAPCDPIGKRL  
KTLAPLVLRGACPQCTPQETKQIQRTLSYVQRNFPQQWAKIVRQYAG-

>MS|comp149356\_c0

MKADCVLLATLMAVVAADFYSSKYDSFDVQPLENDRILLSYTKCFLDEGPCTPDAKDFK  
KVIPEALETTGKCSPKQKQLIRMVVKAVIERHPEAWQQLSDKFDKDRKFKDSFDKFLAE  
ED-

>MS|comp149520\_c0

MKVVLLTLCLALGVLAQDKYESANDDFDVSEVLSNPRLLSYSKCLLNQGPCTPEVKQV  
KEKLPEALETRCAKCTDKQKQMGKALAEVKKNHDPDIWKQLVAMYDPQGKYQQAWQD  
FLKE-

>MS|comp152291\_c0

MKLLIVLALVAAALARPDDSHYDEKYDNFNIDEVITNERLLKNYAHCLIGDGKCTPEGNE  
FKKLLPEATKSNCGKCTDKQKVHVAKAIKAIKEKLPTEYETLRSQIDPEGAHAEDINKYVA  
KYAP-

>MS|comp152624\_c0

MNALLIAIFALAVPTALAYDEKYDKIDVDKILGDDAMFTAYINCMLDKGECTQEHSADFR  
KLLPEVIATSCAKCNAIQKQNVKTKV KALSEKRPDDFVAFRAKFDPKGEYEKDFTA FVMG  
TD-

>MS|comp154133\_c0

MKFVLLLCVMVAAVVADDKYTDKYDNIDLDEILSNKRLLDAHYKCVMDKGKCTAEGKE  
LKDHLTEAIENGCAKCTENQEKGAKVIDHLIKNELDMWRELA AKYDPTGNWRKKYED  
RARAAGIVIPAE-

>MS|comp154647\_c0

MKLIVAVALLCVVAMAWGKPASTYTDKWDNINVDEILESQRLLKAYVDCLMDRGRCTPD  
GKALKETLPDALENECSKCTEKQKSGSDKVIRHLV NKRPDLWKELSTKYDPDNIYQDKY  
KTQIESAKQ-

>MS|comp154792\_c0

MMMMYSSLAMMLLTYLTIQSNATETSTYTTKYDGDLDLDEILNNERLLIGYV NCLMDNGPC  
TADGKELKKNIPDAIENDCKKCTDRQRDGS DRV MHYLIDHRPDDWVKLEEKYNSDGSYK  
MKYLSSKKTEDSKETNVTKSDEETKNSSKE-

>MS|comp155046\_c0

MNFLVLSVVVTLAAFATADLTYTD RYDHVNVDEILDNRKLLVPYIKCTLDQGRCTPDGKE  
LKAHIKDAMQTGCAKCTKKQKKA AKKVVKHIRAKEQDYWKQIVNKYDPGNEYTETYE  
AFLASPDESK-

>MS|comp156988\_c0

MKSYIALLVLSVAAMALARPEEAKYTDRYDNVDLDEILSNRLLVPYVKCILDQGKCAPD  
GKELKEHIKEALENECAKCTETQKSGTRRVIGHLINHEDAYWNETAKYDPQRKFTAKYE  
KELKEIKQ-

>MS|comp158640\_c0  
MQIIILTALCVGLVAGLHVQAGPQMTDAQLEQTLADKNTMQRHIKCALGEGPCDPVGRRL  
RTLAPLVLRGACPQCSMQETRQIRRTLAFVQRNYPWEWAKIVRQYAEFKLRTLST-

>MS|comp160411\_c0  
MVNLFLKMRVFLCVLVYVVVGQELNDMGNMPKYDSRYDYLDVDAIFTNKRLVRNY  
VDCLINSVRCSPEGKALKRILPEALRTKCVRCTERQKRAAVKVIRRLKNDPFEEWSKLASR  
WDPTGDFTRYFEEFLAKESFNTIPGSGSAIPTSSPLAPPRPIPTMPPTIASPAPGPTEPTPPRPA  
ILNRFGEDELMQGSPPSSGVMTPRPMTQATPRPTTMRSTVNSRPVPPRPTMMTWAGAAS  
NTQPTRFPLRPVSDLPPYSTAITLIDQIGYKIIKTTELVTDLLRNTVRAVVGR-

>MS|comp160989\_c0  
MKTILVLCVLIAAVCARPEATYDTRYDNFDVESLVENVRLKSYGHCFLGTGPCTAEGSAF  
KKTIPDALQTGCGKCSQRHLIRVVVNGFQTKTPDIWKQLVKKEDPNGEFKETFTRFLK  
ASD-

Incomplete ORF:

>MS|comp142679\_c0  
MKFVLVLCFLAAATLADDKYTDKYDNINLDEILENKRLLLAYVNCVMERGGKCSPEGKEL  
KE

>MS|comp147733\_c0  
MNSAIVLCVVALAGMVLARPDGGTYTTKYDNVDLDEILANDRLLVPYIKCLLDEGKCAP  
DAKELKEHI

>MS|comp148423\_c0  
KEHIREALENGCAKCTDKQKEGTRRVIAHLIKHKNADWQKLKAKYDPEGKYTHKYEKE  
LEEVQH-

>MS|comp154103\_c0  
DGKELKTHIREALEQDCAKCTKAQRDGTQVMGHNLINHEVDYWNETAKYDPKNLYST  
KHEQELRKLKQ-

>MS|comp154103\_c1  
MNSFTVLCLFALVALAVARPDGKYTDYDSVNLQILSNRLLVPYIKCMLDQGKCTPDG  
KELKTH

>MS|comp599465\_c0  
MKLIVAVALLCLVAESWAASTYTDKWDNINVEILESQRLLKAYVDCLLDGRGCTPDGKA

LKETLPDALENECSKCTDKQKSGSDKVIRH

### 3. OBP protein fasta sequences of *M. separata*

Complete ORF:

>MS|comp116343\_c0

MSKFTCLVLCVVAASISRAYASEEDKAAFRAAIQPIVDECSKEHGVSSDDIESAKTAGSAD  
NIKPCFLGCVLKKAEILNAKGEYDSDKALTKLKKFVFPDETKYAKYAEIGKKCESVNEKA  
VSDGEAGCERGALLTACFLENRADIL-

>MS|comp118070\_c0

MIFRFLLSFYLIEFYGAQARTDQEIKAWFFQEGMECNKEHSISPKEILMLKENKIPDTENAK  
CFVACIFKKTGMLDSKGMFDAASVAMTEKDFADDPQKQENSKLLESCKKVNYEAVT  
DGEKGCERSVLLHKCFVETAPQLGIKLP-

>MS|comp129850\_c0

MYKFTCFVFIYLYAVFTQAESDSSDSSDEVFEKLSHECMEKFGVTEDDLNGVIKTSQV  
NIDSCYWGCYFTKMGVLDKQFDMNMFQTTMKKLMKDDDEDYDNLEKLVKKCEPVK  
DETVADGEAGCERGTLFAVCFVKNDDGDFI-

>MS|comp141177\_c0

MIKFSVVCLYFVVVAVHFWNVKCMTKDQEQEIIKAMKPLAEECASYCGLKDEDLKKYQ  
GGDDMNPCFKKCMQKLGLLDQEGKYDKATLHETMSQYGEDKEKAQKIEDQIDSCFM  
ANADNNGDDEEAIKKRVDVMFNCKIKELKE-

>MS|comp141270\_c0

MTMWFRALAMLVAGLAAAQAIEMDEDMAELARMVRESCAAETGADVALVEQVNAGA  
DLMPDAKLACYMKCTMETAGMMSDGEVDIEAVLALLPPELAAHKAPSLRACGTVHGA  
DHCDTAWKTQKCWQAANKADYFLI-

>MS|comp141612\_c0

MKLFVVLIVLVEIYAAVPLPSNHTDSNLEECRKTSEFTDETLNKMKTNPVEDGGEIF  
KKFIKCYLEKTGAITDDGKLVDEAVPKLGNFNAKKIFEHCKTHVEKVGEEFVVVPTTTA  
SDYSECFRQGVSNYIWNAAKQEGFEPFTYEWQK-

>MS|comp141702\_c0

MSKFSLAFCVVVSVLSVLAEDGPANEGDVLDIVFECAKENEVKASEILAVMTRSVDVTL  
VNPCLWSCCLKGGFIDDKGQYVLNPLQYVKNIVKSDQFYTFIEKSAKQCESVKDKAG  
SECELGALLAACILEQMMKM-

>MS|comp142589\_c0

MLKSSVFLCCLFCALTPYLALAMTDEQKAQIHQHFETIGKACNTGSNVITADDITNLRA  
RKIPSGPNAPCFLACMMKQIGIMDDSGMLQKETLLELAKSIFKEPEEMKLIEDYLHSCAPV  
NNESVSDGAAGCERAMLAYKCMYENASQFGIEI-

>MS|comp148301\_c0

MLLIEIVKFLILVAMCEAMTMKQIRNTGKMMRKSCQPKNVEDEKIDPIAEGIFIDEKEVK  
CYMACIMKMANTIKNGKLNFDAAIKQADLLLPEVKEPAKEAILACKKAADGHKDICDA  
SFHVTKCIYNQNPGIFYFP-

>MS|comp150111\_c0

MDRKGLCLLIVAMFLATGSDAMSRQQLKNSGKVLKKNMKNQVTEQIGTIDKGNFV  
EDKKVMCYIACIFEMTNVIKNGKLNFDASIRQIDLMYPPDLKEGAKAAVDKCKDVQKKY  
KDICEASFYVAKCMYEFNPADFIFA-

>MS|comp150160\_c0

MTKVLLTTVLIVITFALTRAASTQMKDAMPKEAMTTTTMANQDSSIDSTDIDVIAVMNAC  
NESFRIEMSYIQAMNESGSFLDETDKTPKCFIRCVFTNVGIVSEDGKQFNPARAAFIFAGER  
NGKTMDDIGDMTVACAADRQETPCERSYQFLRCLMSMEIEKEYEKS-

>MS|comp150353\_c0

MFKSGIVYFVVAVFLGNALGISDELRSQIQSKLLTVGAECIKEHPLSIDDLAAFKSRVFPE  
GENAGCFSACIFNKLGLFDDKGTWAHVEAFENAKKVFENKEDLKNVQSFLTACAEVNEA  
EVTDGEKGCRAKLAYDCFIKNYEKLGFDFDF-

>MS|comp152336\_c0

MYARVLIRFLEAKLCAAKILNLLQMNQSYLLLLIAACVEISYGMTRAQVKKMTIKNQC  
MPKNSVTEQVKNIEQGDFNEDPNIMCYVACVYKSLQVVKNDKLDVGLISKQIDALYPP  
ELKEPTKKAVALCINSQDNYNDLCSR VFHGAKCLYEKDPACFIFP-

>MS|comp152359\_c0

MSKFTCLVFFIVAASISKAYASEEEKA AFREAVKPIIECSKEHGVSIDELKAAKAAASAD  
GIDNCF LGCVFKKAEVINAKGEFDLDNALTKLKG FVS NEDHFAKFEDIGKKCASVNEKPV  
SDGDAGCERAAMLTACFLEHKGEMPLNF-

>MS|comp152974\_c0

MFNVYFCVFCVGLSLNIKASSLDDLKLYVEVIIIECSNDYPITVADMTELRRKIMPDPSEP  
IKCLFACVYKKTGMMNEKGELSVDGVNEMSRKYLADDPKIKKSEEFTEACKSVNDVA  
VNDGERGCERAALIFKCTVEKAPDFDLI-

>MS|comp153447\_c0

MFGFGFLSLAAVLLCLGSTSALTPEEESSLKEALHPFVLECADEYGIPEEKFEEAKAKGSA  
DDIDPCFISCF LKKA EFFDGDGKLDVEKTNEFVKAHLTSEHVIKFFEAVGGECAKVNDDEE  
VTDGDKGCDRAKLLFDCIQELKSKIGD-

>MS|comp156324\_c0

MTSKCGLLAVMAAVAGSVMGTAEVMSHVTAHFGKALEECREESGLSAEILEEFQHFV  
REDFEVVHRELGAIIICMSNKFSLQDDSRMHVNMHDYVKSFPNGEILSGKLVELIHNC

EKKFDSMTDDCDRVVKVAACFKVDAKAAGIAPEVAMIEAVMEKY-

>MS|comp156380\_c0

MMFFCSTVFFYPFLQMTREQVKSSGKMIKKTCSVKNNLSEDQVKDVKGNFIEDKNFMC  
YVACVYKMGQTIKNTINHDMMLKQVEMMFPTMKAAPVKAIEHCRPVAKKYKDVCE  
AAWWTAKCTYEFDPANFMFP-

>MS|comp156923\_c0

MFKWLIIIVALVAASYGDIPIESRDNKSATLKPLSVCCDIPELGDPKHLAKCSNPKLPGPCN  
DIQCVFEESGFLTDVNTLNKEAYKNHLKQWEENHAGWSVAVDKAIKDCVSDSPRQHLN  
YPCKAYDVFTCTGIAMLKKCPAAAWKC-

>MS|comp158230\_c0

MFGSKTVFYLLTVFSACFGAVDIKKYLKVCDRNAIDVNDMADAVQKGIAMVIHGIPEL  
GVPPIDPYLQKEFRVEYKNNQILAKMILKNIYVEGLKEAKVHDARLRADDDKFHLEVDLT  
SPMVAVKAQYYGEGQFNLSKIVAYGDFNTTMTDLVYTWKLSGVTEKNGTETYVRIKDF  
YMRPDLASIVTEFRNENPESREFTDLGTRFANENWQTLYKEFLPYAQANWKRIGIKVANK  
LFLKVPYDQLFPSSS-

>MS|comp158329\_c0

MKTFLVLAACILLAQGLTDEQKEKLKHNTECLTETKVDEALVNKLKTGDYKTESEPLK  
KYALCMLMKSELMTKEGKFKDVALAKVPNAADKPNVEKLIDSLANKGNTPHQTAW  
NYVKCYHEKDPKHAIFV-

>MS|comp158921\_c0

MFKFCVFLAFCVAASYAAPGGTYCGETPSVIYQCLNSPKVISA VPAKCAKYDDECEKLT  
CVFRESKWLDGTAVDKAKVLAHLDQYERDHAEWGPAVQFAKTACLGP ELKAQGVFLN  
CPAYDVTHCILSSFIKHATPTQWSSSASCSYPHAYAAACPVCP SDCFSPQVPY GSCNACYL  
QPRTP-

>MS|comp159796\_c1

MYRLVILSIVAVSALADEMGMRECGRMFHPSVRCCKKTSELKDKFM LSEDLKECFQMR  
GNPVTCENEVCI AKKKGFATDDDKLDYTKLEEVM TKEIDDKDLLADM IKNVCVNGDLEK  
YGP PDFCEFMKMRHCISMQMLNHCPDWDDAGECSKLKGAV ADCVKLFA-

>MS|comp160581\_c0

MIRSCLVLA AVFQVLFQESGPDPRDGFRQVP PHYCLSPPPGTDLHKCCPIPKLFPDGDME  
RCGIEKASVDQSKSPPKPRIPCKESICLMQANMLLANHSVDY EKLRTFVDI WADSNPEFT  
EAILEAKKACAKDGGPSGPPVCEQDRIFYCLTSNVLWNCKLRDFEDCRVLKAHMDECRP  
YYWKKREEDANAQTS-

>MS|comp161605\_c0

MRAGGLCGQYSQELYKMKSFVVFLV LVVGVYANVTLPPTQQEKAQKLAAECVKESGV  
STEVLA EAKKGHIVEDENLKKFTFCFFKAGIVDS DGKLNVEVATAKLPPGV DKEDAKK

VLEGCKSKTGKDTADTVFEIFKCYHKGTKTHILLAGL-

>MS|comp162075\_c0

MVLHRSATMSVRLALVVIASLLIAVECSQEIMKNLAINFAKPLEDCRKEMDLPDSVLTFD  
NNFWKEGYEFTNRQTGCAILCLSSKLELLDPEMKLHHGRAQEFAQKHGADEAMAKQLV  
DMLHSCMQTTPDDANDPCLKTLKVVTFCFKTKIHELKWAPSMDLIVGEVLAEV-

>MS|comp163093\_c1

MFHGGIWTKLQGFYKWYVLGLVSIYILGELGHYLIGTTSKVTAEDLHYGDKSCMLNLS  
HVSLSDLPVVCEKVNSSDICATLTLNGTRYCEWGYNGLGIDYQVLAGPAFMAVFTVVG  
ILGVVADKYNRARILSFCTLIFVIALIMGSVKEYWHLVLRMIMAAGESGCNPLATGILT  
DLFPEKQRALALSIFNWGIYGGYGIAFPVGRYIPDVNAWGLSWRVCYYGAGIVGLVITLL  
TFLTLREPSRTTIGEEGTGNKAGDSTLESKMPQVTIWHVIAQPRIILLCLAASIRHCGGM  
CFAYNADLYYRDYFPDVDLGWWLFAVTVGIGSVGVVAGGIISKYVEKMGVRSRVLVL  
ALSQLIATLPAFGSVVFGPLWAMITLAISYFFAEMWFGIVFAILVEIVPLSVRSTTVGVFLF  
VMNNVGGNLPILVDPVSKIIGYREAIMIFYAGFYGISSIMFFLTMFLMDGPVDKPAATPEEP  
KRTGLDNRAFTQDELPTRNAGRSLPTAPSERL-

>MS|comp167844\_c0

MSKFTCLILCVVAASLSSFYVRAHTPTFRDSLQPLIEACSEEYPGVTSDMVNQAAKEGNP  
NIIHPCFNGCVFKKAGFINEKGEYDTNSALTNLRKLVTHEEQYRKLAEIARQCTSVKDTVT  
DGEAGCERGARISACFLQQKDNVSL-

>MS|comp173090\_c0

MSKFTCIVFCIVAASLTKVSHAVTEEEKAAFREVMAPIIDECSGEHGVSKADIQAAKEAGS  
ADGIKPCFLGCVMKKTETLDDKGLFDAETALSKLRTFVKSDEDFAKFEEIGKACMSVNEK  
SVSDGEAGCERAKLVLACFLEHKADIPF-

>MS|comp60723\_c0

MFTGTLPVVLCLVAAA YGGKEKPVFSDEIKEIIQTVHDECVGKTGVAEEDITNCENGIFKE  
DTKLKCYMFCLMEEASLVDDDGTVDYDMLVSLIPDEYYERTTKMIFSCKHLDTPKDKC  
QRAFEVHRCSYGKDPDLYFLF-

Incomplete ORF:

>MS|comp108141\_c0

MFKFTGLLYCAVAVSLSGVVRAGEEDAEAFREAIKPFITECAKEHGISWEDIAKAKETHTV  
SSLKPCFVGCIFKKFEIINDKGE

YDLEANLDKIKIFVKNEDLLTQLRDIMKKCVSVNDESVSVDGNAGCERAMLLANC-

>MS|comp114857\_c0

MTPTTLVLALGLAAALADVNMKDVTLGFGQALDKCRQESDLTEEKMEEFFHFWRDDF  
KFEHRELGCA-

>MS|comp121812\_c0  
MDAQKLGIQRELVTVGIQCIKDHPLSLSDIRAFRNKMIPNGNDPKCFVACLFKKIGVMDN  
MGMISPAKAKENAKKVFKGSEEHL

KNVDEI-

>MS|comp124490\_c0  
VRLALVVAAWLFIRVDASQDVIKNLSMNFAPLEDCKKEMDLPDSVTTDFYNFWKEGYE  
FTNRQTGCAILCL-

>MS|comp131182\_c0  
ENTFLQLPFALMQVSMDCFAGQRVMDASVMFECAYDCKWENFDKANMRLVLVMLQN  
AQKMTLSAGGVKTLSSALSMSVFRGI

YSAYTTLRTTMK-

>MS|comp133839\_c0  
VTLPPIQNEKADNYAYACIEESGVTTEALKESRKGNFDDDEGLKKFTHCFFQKADIVTCDG  
QLNIDVALAKLPVGVDKVLAKEI

LEGCKTKTGKDDSTDKVYEMFKCYFSQTPVHIKLSFDIEKKTVSA-

>MS|comp133858\_c0  
QIHEDEALKCYMNCLFHEIDVVDDNGDVHLETLFNTVPGTVRNQLINMAKECEHPEGDT  
LCHKAWWFHQCWKKADPVHYFLP-

>MS|comp141404\_c0  
MNTSNFQSIFCIVGLFFSYSHAMTRQQLKNSGKLMKKSCMPKNDVTEEEVGDIEKGK  
FIENRNVMCYVACIYTMTQVVKNN

KLSYEAVIKQVDIMFPAEMRDAVKAAATFCKDTTKKYKDLCEASYWTAKCMYD-

>MS|comp143661\_c0  
KFTCLVLCVVAASLSQAYASEEEKAAFREAIKPIVEECSKEHGVSHDELKSAKDNQNADNI  
KPCFLGCVYKKAIEVFNSKGEYDV

DKALEKLLKFFVSNDEAYAKFAEVGKKCVSVNDKAVSDGDAGCERGALLTACFLEHKAIEV  
PL-

>MS|comp145270\_c0  
MWNFIVLCLALCSCTYALTEELKMQMTKLVKCNKDSQVDMMELVQLQSFVVPTKMA  
TKCVLACAYKAADVMTADGLYNIEHA

YKIAEQMKNNGDEKRLNNAKKMADLCVKVNEERS-

>MS|comp145826\_c0

MSKFSGLVLCVAATFISVASGESLSSESLKPVIEKCSKEHGVTDADIQAACKAGSSDGINPC  
FLFCVFQNAGIFDAKGEYDAAT

GLKNLRQIVKDNDQYKNLEHAFNDCSKIKDKPVSDAAGCEKGLHL-

>MS|comp154997\_c0

MADSRMRLVCLVCVIFAASSAMASKELLTKMSSGFTKVVDQCKNELNVGEHIMQDMYN  
FWREEYALVNRDLGCMVMCMAAKLDL

IGDDQKMHHGKAEEFAKSHGADDALAKQLVGLIHECETTHAGVEDACSRILEVAKCFRS  
GIHELDWQPKVEVIVTEVLTDM-

>MS|comp158322\_c0

HELKWAPSMEVVMEEIMTAA-

>MS|comp161014\_c0

MSRHFNLLTDSSRMHHDNTEQFIQAFPNGEVLARQMVS LIHGCEKQFDHEEDHCWRILH  
VAECFKQACVQHGVAPTMEMMMTEF

IMEAEAR-

>MS|comp161583\_c1

MNIKTSFIDYPAHNPEVIRVGQLFQVATYLADGHKDICDASFHVTKCIYNQNP GIFYFP-

>MS|comp393373\_c0

MSRLKTAIAECTKVVESIFEVCEYASVFND CMHIKMEHILDQVMMERRLEAIGKITTDPEQ  
WGDTEDEILKLVKDEL-

>MS|comp427468\_c0

MFVYRYMIAFH TLCVVYYVVGQHEKESKFGEIVKRTVIATAHTCMDHVNATVKDLENLR  
DREEN-

>MS|comp502645\_c0

MKSFVVCV LVAGAFANVSLPPKQNEKANQIATECMKESGLKPEVLAEAKKGHISDDEH  
LKKFTFCFFKKAGIVSEDGKLNTE

VALAKLPP-

>MS|comp672758\_c0

LEKIGVVKSNKY SKLGFMTAVTPLVFTNRKKLDHMKTVSENC DREVNHKQETPCQLGNE  
VTTCIFKYAPELHFKS-



>MS|comp71248\_c0  
KKMADLCVKVNEEKVSDGEKGCRAALIFKCTVDNAPKFGFKL-

#### 4. OR protein fasta sequences of *M. separata*

Complete ORF:

>MS|comp163536\_c0  
RRVAMENQNPPERVVVPVQYGRGSRAFRQFKNPPQPHMCIQDTIKGTTEKLYINVLGWQKI  
ANPKQYSDPIPLYGGMQVPQNYGPNAGRPPMIVFAVMVNPDILKANGKNATSPTDREALV  
SLLCDFVEAMNPLGLALARNPVIMKDRDLGELKDVLAVQNKREKGMNQDVMYKV  
YDIDGIGEDNMNEDDNNQMKQGGSPNRGSGDKKPKVSSKQILLNAGQKSEFDSGMNNC  
QINQSHLNRDNKTGNTPTDITYCTPVYGVIVSTRENHNQINDIQKFASNEIKPSSSFRKDW  
NPMHGGTTEGWDEFKRNISTIKNDEKKRCIKDKSKISNGKSHYDFPYFDNKTVNETDV  
PEEEDSMNKEQNSNEENSKIIDPMQKLVLHSTDKNICDNNTSALSSISS-

>MS|comp165911\_c0  
MSRKCNDPNSFCYVCGILTFFKKQRQNFTNLVLECYHQCFGFSVAHQDKFWAPHVCCITC  
VKNLTDWKKGARAMPFAVPMIWTEPRDHVSDCYFCLTDIKGINYKKKKQLSTLLPPLHIK  
LGLIKNFVKGMDRSGSGVLYLKEKFPKISDAKIKEGIFVGPQIRELIKDSTFEEKLSGLEKC  
AWNAFKNVVANLLGNHKGDSYRELSELLLSYQALGCNMSLKIHFLLDHLDFPDNLGA  
VSDEHGERFHQDISSMEKRYQGKWSPNMLADYCWITIKRDQPEAKHSRKS-

>MS|comp157094\_c0  
MKLVSDASELEGVEKTEDIPYMQILRKSMWILDWPKTPNESRIHRYYMVFIKICCLIPGII  
YLRNNTGKLSSEFMGHTYITVFMNTIAFSRALMVLSKKYNDILFYFLNEMHLFNRYRNKSD  
YSYQTHILVHKISHFFMYLLMMCLGILLFNLTPMYNNYTDGMYREVKPPNATFDHSVF  
YSLPFDYTTNLRGYLALFTFNWYMSCTCSSYFCVVDLTISLLVFHLWGHMRILQYNLQNF  
PKPASLLVESKDGEIKDHKYNEQEIQDIHNRLRENLYHSVIIDFQRRMSDSFGAVLLIYFL  
FHQVSECLLMLECSQMDKKALLRYGPLTVVIFQQLIQLSIFELLGSSNDKLIDAAYCVPWE  
YMETKDSKMVLVMLIQSQVSMNLKAMSMLTVGVQTMIAILKTSFSYFVMLQTVAEIEEE-

>MS|comp164245\_c0  
MMTKVKAQGLVSDLMPNIKLMQAAGHFLFNYHSENAGMSNLLRKIYASTHAILIIVHFAC  
MGINMAQYSDEVNELTANTITVLFTHTIKLGFFALNSKSFYRTLAVWNQSNHPLFTESD  
ARYHQIALTKMRRLLYFICGMTCLSVVTWITLTFGGESVRMITSKETNETLTEVVPRLPLKA  
WYPFNAMSGTMYIVAFQVYWLLFSMAIANLMDVMFCSWLIFACEQLQHLKAIMKPL  
MELSASLDTYRPNTAELFRASSTEKSEKIPDAVDMDIRGIYSTQQDFGMTLRGAGGRLQNF  
GQQNANPNGLTPKQEMLARS AIKYWVERHKHVRLVASIGDITYGTALLFHMLVSTITLTL  
LAYQATKINGINVYAFSTIGYLSYTLGQVFHFCIFGNRLIESSSVMEAAAYSCQWYDGSEEA  
KTFVQIVCQQCQKAMSISGAKFFTVSLDLFASVVGAVVTFYFVMLVQLK-

Incomplete ORF:

>MS|comp11107\_c0  
YAYLIMMRHLLSVISSWPLKILDPLDTGAIQRRKIWVSIQRFFHMAVCLSTVVGGVMYVM  
LHKKSMTFFELGHLYISLLMTFVIF

>MS|comp111125\_c0  
EEEQLFIDITVKKIEFLFRCAGFNIKCSPKTHMDTIKSRTIFIVNFIWMNIDFVGCVVWFITGI  
VNSKSFVELTFIAPCVMP

>MS|comp143892\_c0  
VGIRLPLFYMTPERYPLAYTIVVISFFYISHFVMVTDLKMQTHLMHLLCQFTVLGHSTT-

>MS|comp1530192\_c0  
MSQVVSTCDVLVVATAGAGVYGAPRRMRKMLKFMENIASVDTSIGGQYSLVTERKLCG  
IILGILIFFSVLIADDFTFYALQAKKLDREWEVVTNYLGFYLLWFVVLILELQFAFTALSVRA  
RFSAVNDALALTA

>MS|comp1754988\_c0  
KAKKFNKIYWKAVAFVSITSNCTHTMAPLMLHFGKGMELIFPVCSYAFFSESFRHMFIYPI  
YFYQSVGITFHMLYNL

>MS|comp1789939\_c0  
NSTPKYIIFKLQGIPGWLSGLAPAFGSGRDPGVPGSSPTLGS LHGACFSLLLCLCLSL

>MS|comp1802501\_c0  
MVVLSLGISSEIGILKLLYMFLYIDNIRGLTDAFLDFDALTPGSRQASNLLRYMRDVKKRA  
IFYWMVLMVNGTIYVFMP LAIP

>MS|comp2429514\_c0  
MKSFKALKETLVETKRLVKEDSLESVMFIVNVVFNFGFSYKKGKVTSWFWILHLSLLF  
YVYA

>MS|comp43532\_c0  
KYKGFNETFKLCAFSLAFALYFNRTTAIKRCVIITAIVTFCGGQLFWFITYTFKCLYTLDIY  
NFARN-

>MS|comp790023\_c0  
EETKTWITFLSSISKLLLSQTLGVLAFALGPFSLISSNYLKTGEIKLVLPFIVWYPFDELDTRI  
W

>MS|comp957466\_c0  
WIMGLHQIDCFKIHMKFWRFLAIWPGDDDSRSYNRYSKIFISTFVYVYVLFYFLPRR  
LDIFIDMMFYFTDCSVVSKVLTFVLMRHKIVAILDVLESEIFQPDDDDGRAIIA

>MS|comp102652\_c0

CAQLDIVKEKILSITSINGQRGTREVDEALAKNYNKLVNCKIKHHQAIKFTELVENAYHPYL  
LFQLVGSVGIICMSALMILVVDW

>MS|comp102652\_c1

VSSQITCGMWALKPLFDDADRKFPFDMWMLNPEKTVQYYIGYTFQLVTICISAYMYFGV  
DSVAFSSVIFGCAQLD

>MS|comp1032844\_c0

KFLGVWVPGENGSLHTGYRAFMMTLQYLFLIFQIYIIQVWGDLDVAVSQASYLLFTQACL  
CLKVTVFQVNMGMMLKDLDP

>MS|comp104640\_c0

VGKLEAIYRVTIGIGFGLDAISLCLFFVLPLEVCLNFAPLIYHSLFIFFLYCFQGQRLTASEK  
FEIAVYCCGWENLRVKEQRQVLLMLKQAQKPVIVYAARVIPIRIHTFASTMQSIYKF

>MS|comp107793\_c0

QTRAQTPCKLTASNFAEVNLKAFMKVPKPNFY-

>MS|comp110478\_c0

LTLVV TALTILCSTGFFMWNAGDITVEAEVLPTAMFSSGWENCWHESSVRVRKLVIAMLQ  
AQEPVALTGLGIIVLSYQSYVSIVKSSR

>MS|comp110712\_c0

MLRRIAEQLSKIFGVVIFIHMV SASLVICFFGFLAVVYSGLADTVANLMTVFNAMTTIFFLT  
LSG

>MS|comp116110\_c0

LSFQSENLEWLYQCPWYEQDTKFNRALFIAMERMKKPIIFKAGHYISLSRPTFVSILRMS  
YSYFAVLNQTR-

>MS|comp116394\_c0

LRNVKKRAMLYWVVVAGNGVLYVMKPVAMRGRNLPENYFIIYGLEPMFDTPNYQIAYF  
MMIAGVFFICYVPATVTAFLIVITGYAEAQMLALTEE

>MS|comp1239304\_c0

FWQKYWREVL DYVTEADKFERQSGDPIKTMIVDTYTKYCRRLSYFYWAIVFTTFWTTTG  
TPLMTYLSSFTFRENMRN

>MS|comp124817\_c0

KWERIPTSQRRLMMMMRAQRPLRLTAAGFTHMDNACFLAIMKAAYSYYAVLSQRQE-

>MS|comp133273\_c0

KVRQIVSECLASDAAVVAGSRFSSNLLSALRHVKERAMVFWMVIIIFNGVVYIVKPLLT PGR  
HFTEDKFI LFGLEPMQENPNYQIANMLFAAGVFFTVYVPANITAF LIVVTGYVEAQMLSLS

EELLHLWEDAEEHYKTEQAISIFDSNKTDLKD KAMNEYVAKHLKDIIRSHGRNINL

>MS|comp1348560\_c0

KFDMITVEYLA AVALDTFVYCYYGHQIILQADRVSTAA YQSMWHTMGVLP RR VLL

>MS|comp1355432\_c0

RISEAVMECKWECIPTSQRRP LLMIMRAQRPLKLTAAGFKDIDDVCFLSIMKAAYSYYAV  
LTQKQEK

>MS|comp139413\_c1

GGNRFVHLVQR YEAVTWYTKAVSEVFNGSMSFEFFSCSAIVCVITYRMSFVSFLFLLVSY-

>MS|comp142810\_c0

LWRFFAMLT LREIEHEIRKFGLEYCDLPTMLENVSILLRVLT VNIDSNYHKGIKIYSYILTAV  
TAVCFYYVFLFSMSWV FYRCRITGELVGAMVVLSLGISSEIGPFKLFYMCFHMDKTQKI

>MS|comp147212\_c0

LKALSVETSNRFYSSGWEQIDDQVR RMILFMVARAQAPIAITAFNMLAFDMELFTSILQS  
SYSMFTLLRS-

>MS|comp150812\_c0

SSVIICLDGFNVMAINNIATITCLSFLFTSLLQIFFLCFFGDLLMTSSIEVSDAVYNCRWYLA  
DTRLGKDLLMQTR

>MS|comp150812\_c1

VISVLNVFYFVLAVMVALSPLSLMALNYYTTNELELLLPLLAVYFPDHYNIRYWPWVYLR  
QVWSTVIVTIDICTADYIFYIFCTYIRMQFRLLKQNIETFIPDDVIDGRLRNNEAVRTEFVVL  
VKWHQDLISSTKMLEAIYTRSTLLNF

>MS|comp150890\_c0

CYLVDNKIFQAFEVGDAGWTCGW HETPLGLMIRDDIIIIIRAQQPVTIKFTGLPHVQLETFS  
SCMSSSYSYFNMLRQYSK-

>MS|comp1523813\_c0

DKIQMTRLNKSLKH YE VILTFCDTVQDILSVTLFFQYGVSTLIICVVM TGLALPSSIEFRAFL  
AMFLFTMTLRIFVPGFLGTQLSHESEEL

>MS|comp152388\_c0

MADEELEFKPFS DTYRKITFALS VGM IYPNPKTEKWRLASIPILVTSIMPLACMILYDMYKC  
WMVKDIVNIIRHSTVVG PFLGGFFKMILMYHKRIQAKEILDEIDRDHEL FNDISDIYKDIAR  
ASIKNSQIY SERGWVITVSTCVMTFPVIAIVLNIYNFTFKSEPEKYMIHDLVIPMSESEMRFE  
SPYFE

>MS|comp152487\_c0

DLKNRTYEQAINCLYPWNFETSLSGYIVANLSGWYGTFLCGSSVSMFDLFLCLMIYNLWG  
HFKILIYNLENFPRPAAEVVDAAGEERSGMRIGSEMYSQSELDEVAIQLKDAIQYHKLIVD  
FTNNMSDAFGMALFLYYSFHQVTGCLLLLECSTMTAAALTRYGPLTIIMFGELILLSIIFETI  
GTMSEKLDKAVYDVPWEYMDTKNRRTVLIFLIKVQEPVHVKAGGLLDVGVTTMASILKT  
SFSYFA

>MS|comp1998815\_c0

FVFLTLTYTVVMTLQVMVPCWFGSRLIEKSSQITFSVYDCDWTTPRCRRFKSNLRLLLVERAN  
RPITIRGGKMFLLSLATFTAV

>MS|comp2023556\_c0

IVMVASFTAFLVFGLMQIFLYCYYGDTIMRSSMQISSAIYNSNWYNVGVVAERKSFLIVLIRA  
QKPCELTANG

>MS|comp33920\_c0

KKDFEYICSEGEKYRAQYFEEQLLTWKICIVMCTFNAGIGIAMNIFAYLSLFYFMATHDAD  
TEESRPLLFPFWIPNVDLT

>MS|comp35555\_c0

SFCIATTHLRLKLLTLKVEKAFKNSRSRHELRMKMNEAIRDHQDAYDFYVQLQNVYGP  
WLFVAVLLTSFMISFNLYQIYLLQRIDPKYTSFGVVGV

>MS|comp360965\_c0

AIVYKLLLIFEQIICGPVVCLTAYCIAEVFFFTIMNLLVFCCHFFSYF-  
YFQKIDKGEFQAILLLL CIATIVMYFTPSLLCTYLSIKVRILN

>MS|comp3974\_c0

LMSYLCSVSFCMLDLFLSLMVFNWGHFKILLHDLATFPLPAKNMSSNNYG

>MS|comp447468\_c0

LEISDAVYNCKWYFATPRVSKQLLLVQTRAQEPCKLTAAGFADVNLNAFMRVLSSAWSYF  
ALLQTVYSGK-

>MS|comp50905\_c0

EKWNEVAYKSFLVTALTQTWLLCWYGQKLIDSSKRLADALYDCGWYNGSKRAKSAILIM  
LHRAQKGIYVTTHGFSIISLASYSTIIKTAWSYFTLLL NFFKD

>MS|comp55130\_c0

LTFILLHMNELVLEMTGIQDHRWRVYCTVVLSQCVDHYVKIKSFSNRLNVICRPFYLALIL  
VAIMLVCMCSVKIAISNK

>MS|comp611033\_c0

KSKESVMKINKCILHFDEVGKFCDLVEDVFSATLFVQFGMASCICVCLMRFTMPAPMSYF  
VFLGTYMCMILQILVPCYYGTRITDKSSLLAFSIYNCDWTPGSRQFKS

>MS|comp633077\_c0  
FIPENSNTTLTYEMYTENEQKNVGVKLGELINYHRDIISFTDKISEVFGPMLFAYYGFHQAS  
GCLLLECSQMTAAALIRYLPL

>MS|comp638207\_c0  
AYVVGWDTLVVVSIMIFFAGQLKITCYICRMMIDAAKLKD KSHRNIADCHRFYTTLVEYTHL  
FNSLISPVMFVYLVVISVNLGVNIIQIVEIQDDIPTLVSSVLFVVAQLIQLLLFYWFANEVTIE  
STFVSYS

>MS|comp79584\_c0  
QFKSNMRIFVERANKPLSITGGKMFCLSLPAFTSIMNSAYSFFTLQMKD-

>MS|comp80641\_c0  
DKRVRQIVLFMLMRARIPMGITTVFYVINLDTFAEMCRQSYTLFNLMAAWE-

>MS|comp813906\_c0  
GSISDRLKFAVYGLPWESMDKKNRRTVAFFLMNVQEPVHV KALGLADVGVTSMTAILKT  
SLSYFTFLKSM-

>MS|comp892037\_c0  
MELWHQIRKFGLEYCDLPTMLWNVSVFLKLLTLNIYGKNKSGIP

>MS|comp90072\_c0  
LSLMVFHLWGHFKILINLLNDFPRPSSGSNFTTEDGFLIRA EKYSKEELQQVSERLAECIY  
HREIVNFTNTMSDVFGPMLFVYYVFHQ TSGCLLLECSQMTTQALIRYVPLTLTL

>MS|comp904167\_c0  
LMQVGMDCFTGQRVMDANVKFERAVYDSKWENYSLSNMKIVL TMLQSAQKTMKLSAG  
GMIMLSFSCLMQVIRSIYS

>MS|comp926109\_c0  
MRLKIIRD FLLKESFDFDRPDIDLYNFHPQLRIFLAVKGVFFSNRNSRLRYIWP AICIQLSVV  
A

>MS|comp94306\_c0  
FAQLTVSLIICVTAFAQLSIAHPDNMVRLLSMGTYLLNMCFQVFIYCYQGNQLSEESSEIAG  
AAYESPWYKCSLRVRRSLIVMVRTRRALRLTAGGFTTSLASFM AIIKASYSLFTLLQQV  
DE

>MS|comp94444\_c0  
EITNQSAKVGEAIIYCSGWECGLSKLPGVRSSTILFVIARANRPLVLTAGGMYDLSLTSYTTLV  
KTSYSALTVLLRFRHD-

>MS|comp948927\_c0

RSRQFKSNMRLFVERTNKPLSITGGKMFCLSLPAFTSIMNSAYSFFFTLLQQMND-

## 5. GR protein fasta sequences of *M. separata*

Complete ORF:

>MS|comp134624\_c0

GTASRGLAMNLHKALEAEHPALKVAQYRHLWVDLSHMMQQLGRAYSNMYGIYCMVIF  
TTTISLYGALSEILEHGLSYKEMGLFVIVGYCMTLLFIICNEAYHASRKVGFLEFQVRL  
LNVLN LGAVDRSTQREVEMFLVAISKNPPIMNLDGFTNINRELFTANVSFMSTYLIVLMQ  
FKLTLLR QSARKTIKSVIKAVFNTSTTMLDDDDISEDEEEA-

Incomplete ORF:

>MS|comp636901\_c0

MRACGLFCVDVCLILHLAELLRTYSIVLLQFAFL-

>MS|comp19407\_c0

CANELPKKLLMVELSWMNTDAQTEVNMFLRATMNPQSISLGGFFNVNRTLFKSLLATM  
VTYLVVLLQFQISIPDESQ

>MS|comp121176\_c0

AILFVIFLVPFWIPFVGVGVAHQVAIYKTNWVKFQVRYRVTGENLKFPNLKTTIVISV  
G CLLLAVCFLLSLCILMDGFLLKHTTA

>MS|comp1194584\_c0

MGVESAKVEEVTASPVPTESGTRPTRPTHCVVGGAHAFILKISSFFGLAPLRFESRSNGFTV  
S

>MS|comp82756\_c0

QLLHTLAGGIKATQKCRPDSSDHRLMGGYVHSIYFVFSFAFLVVRSLAVSLTAAKVHAAS  
LEPAHSLYDVSSANYCVEVERFLAQIHGDTVALTGLQFFQVKRGLVLTIACTIVTYELVLM  
QFTGVSPASTEVS

>MS|comp1687776\_c0

IYSEERVSSNMVDKDVQSMLLPLNLSHTMFCPKYRIKDNIISPNSLISKFVSMIAALLSIFT  
F

>MS|comp109140\_c0

LSLHKVQILRTAEGKFEEAVIEYLFTVYLFPIIAPILWYETRKIANVLNGWVDFEMVYNQL  
SGRTLTPVKLYKKALAIIVIP

## 6. IR protein fasta sequences of *M. separata*

Complete ORF:

>MS|comp159644\_c0

MIIDLSWSPWRMAEDLASETGLPLVRTLLGSQQLVKALDDYLESRNATDAAIILESESDVD  
RTLYELLGASSIRVWVHAGLTRDSAKALKTMRPEPSFYTIVGDSGFVMDTYRRAVKEKLV  
RRSYRWNLILTDPDVTQLVLPVTLQADQVECKLMKREDCTCPSDFQRKQYILNGL  
IQYISETYSKLERDLPLTTTSDCEDPQPVMNSTRDRLYRQFAEDSEISNETLFYWEAERSG  
LFLRSRILSTYSLEAGQQTATWSADDKYKLLPGVELEPLKMFFRIGTAPAVPWTLMKVD  
PNTGEQMFDEDGQPLYEGYCVDLIARLSETMSFDYEIVSPKSGDFGKKLPNGTWDGVVG  
DLMRGETDIAISALTMTAEREEVIDFVAPYFEQTGILVIRKPIRKTSLFKFMVLRTEVWLS  
IVAALVLTGFMIWLLDKYSPYSARNNPDAYPYPCREFTLKESFWFALTSFTPQGGGEAPKA  
LSGRTLVAAYWLFVVLMLATFTANLAAFLTVERMQTPVSSLEQLARQSRINYTVVEGSSV  
HQYFINMKFAEDTLYRVWKEITLNATSDQAQYRVWDYPIREQYGHILLAINASEPVPDAK  
TGFQQVNEHTDADFAFIHDSAEIKYEVTRNCNLTEVGEVFAEQPYAIAVQQGSRLQEDLSR  
ALLELQKERFLEQLASKYWNESARQACPDADSEGITLES LGGVFIATLFLGLAMITLAW  
EVFYYKRKEKNKVQAFNAKPEKVAFESKSTLESKVAESMAKLRKRAKVGKKGANIAKN  
VTFGDSFKPVSEKGVSYISVFPKEYRP-

>MS|comp161214\_c0

MAGIELIISSICNATFCEVPYNETYKSGTDPMAEKDTNFMNLMKEVNGKVLKVTTYNNNT  
PLSWSEYHNGTMVGRGVAFTVMDILRKKFNFTYEVVLPKRNYEMGTKMTGDSVIGLLNS  
SKVDMAAFLPTLIAYRERSFSIDLDEGIWVMMLKRPKESAAGSGLLAPFNELVWYLVL  
AAVLTFGPCITFFTRVRSKLITDDEGVLPKPSFWFVYSAFLKQGTNLAPEANTTRVLFVT  
WWLFMILLSAFYTANLTAFLTLKFTLAI EYPRDLYQKNYRWVASAGSSVEHVVKSEGEEL  
YYLSAMISNKAQFLS VISDTDFLGIVKKGAVLVKEQTVVDHLMYNDYTSKKDVEESEK  
CTYVVAPNAFMKKQRAFAYPVGSKLKSFLDPVLTQIFQSGILDFLKRADLPSTKICPLDLQS  
KDRKLRNSDLIMTYLVMVAGSATAVAVFAAEIFIKRYVSGKIITSKKLKKKSKMSKKSTN  
YDDSRPPPYDSLFGKNPRFNVETTRTKIINGREYYVFETASGEKKLIPARAPSSFLYRSDK-

>MS|comp165699\_c0

RPTPDANSRDLGKIKTTYSMNGEPEITSAFYFDLSLRTFLTIKSLLDSGKWPNDMKYITCD  
DYDGKNTPNRTL DLKTA FQEIKETPTYAPFFIPQDDPMNGRSFMEFSTELLAITVKDGASIS  
SHSLGSWKAGLSSNLTLDPNNMSNYSAQLVYRIVTVEQRPFIVRDDKAPKGFKGYCIDLI  
EEIRQIVKFDYEISLAPDGNFGIMDENGWNWNGI IKELVDKKADIGLSSLSVMAERENVVDF  
TVPYDLVGITIMMKLPRTPTS LFKFLT VLENDVWLSILAAFFTSFLMWVFDKWSPYSYQ  
NNREKYKEDEEKREFTLKECLWFCMTSLTPQGGGEAPKNLSGRLLAATWWLFGFIIIASY  
TANLAAFLTVSRLDTPIESLDDLSKQYKIQYAPLNGSSAMTYFQRMANIEEKFYEIWKEMS  
LNDSLKEVERAKLAVWDYPVSDKYSKMWQAMEEAVLPNTIEEAIQRVRDSKSSSEGF  
LGDATDVKYHVMTSCDLQSVGDEF SRKPYAIAVQQGSPLKDQFNAILQLLNKRKLEKLV  
EIWWNNNPETMKCEKQDDQSDGISIQNIGGVFIVIFMGIGLACVTLGVEYWWYKWRKRP  
VVGDVVHVTQVEPAKSSRNNVDKQGEFNFGRNLGLSFKPKF-

Incomplete ORF:

>MS|comp100717\_c0

PAVSSVRVVMFSTLLAALFVFTAYS AKIVAILQTPSDALRSIADLTRSPMVVGVQETTYKKV



YFQESPDEATQQLYRRKIEPQGERAYLSVVDGIARVRTGFFAFQVEQSAGYDIKQTFTERE  
KCSLKEIEAFKLPLVAVPMRKHSYRELFA SRLRWQREVGLMDRERRIWLVS RPRCEASSG  
GFVSGIHDVLPALQVLALGAFLSVVLLASEVG

>MS|comp104026\_c0

LLDVDTAIEPKGRDGVEIRIVEELCRWMNCTVEIVREDVEQWGDYIPNETGGIGVLGSVV  
EDRADVAISE-

>MS|comp119947\_c0

FPTTNHLLDFLNAKRKYVFADTWGYRVNGTWNGMTGYLLRGEVEIGGSPMFFTFERSI  
VDYISSPTPTRSKFVFQQPKLSYENNLFRSE

>MS|comp1203294\_c0

KSFTRSMAYSIEKLPAGEYITQEAMLDMMLMLEDFYYEQCVMMRKSSPYTEKVSQLVG  
RLHQSGLLLAWETQIALKHLNYKVQVEVR

>MS|comp124776\_c0

KKYEKYSEQTLDTCLPPTWSDITIFLLSAISQQGSSNELKGTGLGRVLMFIIFLAFVFLYTSY  
SANIVVLLQSTSNQIRTLPDLLNSKLELGVEDVAYNRYYFSAAYTSKDPIKKAIFERKVAPK  
GKPNYMSIEDGVKAIQK

>MS|comp129582\_c0

KEVMLGRADIGIAGMYLTSDRVRDMDVSMASHDCAIFITLMSTALPRYRAILGPFHWHV  
WLALTFTYLFGMFPLAFSDKHTLRHLLHNSGEIENMFWYVFGTFTNCFTFLGKNSWSKTN  
KITTRLLI

>MS|comp131374\_c0

INLNGYKYRRWDFQ NITMRMILVAQPAPKHLDELLAGPSPVPGVAMITQTCATVLYEVA  
VMHNIKYFPTITDRWIGTNERNSSKVVSNSLYFREQDLSPVIRFLKSVQENS DVLSPSLTAIE  
TRYYYRIPTVGPCKFE

>MS|comp135198\_c0

FVGKYFNEGEKCGLREIQYLQVIDPWLA VRKNTPFREMFKIGTKRIQEHGLQYRENLLMY  
EKRPKCS

>MS|comp136712\_c0

KRPFAFMNTGTGYRIVSAFFREHEKCGLQEIDYIQNSKPWLCSQKYSPFGEMFKVGYIRI  
QEHLSDRENRLIYAKKPVCSVWEEASTQSIWWISILCVFYCCMERFWLLSCLALRFWCI  
VCRREE

>MS|comp138392\_c0

WAAVAFTYFYASIGILTAQGFATTSYPFLKSFGMMIGQSQYQNVASNSWKIRSVTGWLLIA  
GLILSSAYGAGLASTFTVPKYEPSIDTVQDIVDRDMEWGATHDAWIFSLTLSTEPLIKQLVN  
QFRIYSFDKLKEKSFTRSMAYSIEKLPAGNFAIGEYITQEAML

>MS|comp1582011\_c0  
SPYLELFRVVFVKQLRESGIQSAVSKRLQVSKPHCSSKMSSFSSVGLMDMKPVLIFMLYGIC  
LSVAIAVAEI

>MS|comp1872421\_c0  
IDKITDEVRFEMQRSITGHFLAAGSGTIKIPSAEEKGLTLEDTQGMFLLLAAGFIIAGTALVS  
EWMGGFTRRCRFRTRKVDTPISVNSG

>MS|comp2100871\_c0  
SVNSGEHLIPTPKTDIDSEIRIIGDTE SRLNFDSRPSTAVSTDTLDGQIINVSEDNFDVHNTFN  
VSRFDS

>MS|comp395436\_c0  
FAETWGYPINGTWNGMIGDIKRGKVDLCGIVTFITLERLPILEYLNQPTPVTAKFVFRQPPL  
SYQNNLFILPFTSNVWM

>MS|comp50464\_c0  
SFISLIPNSESVMQIFNVSEMGCSDYIVRMQEPQKFMEAFETVVHKGNVRRSDRKIIFLPY  
DEEYNEEYDVDLPSLVFSMKGSAYV

>MS|comp634464\_c0  
KRRRFVSHDMESLDENRSTVSRAAFGDPIKHDK-

>MS|comp71302\_c0  
GGSNFVSVSMVDCYPALVILSYGAIVALFLLGLEILVYKREKILRKLSCVRHHNYE-

>MS|comp82009\_c0  
GRLQRQEAEVGLASFFIRPDRMRVADFISCTVLACTFIFRQPSRSAVSNVFLAPFSGGVWA  
ACGGVA

>MS|comp849777\_c0  
DTIKQLLAGFYRVGTLDRGGWEKWFLNSSDPDTAKLLKKLELVPNVEAGIRNTTKAFFWP  
YAFLGSKAELEYIVQANFT

>MS|comp88910\_c0  
EDHPDCKNGIMCYCQELMDAFVSALDAAIQDEFDVAQVSDEEWESIRPNKIQRDMLL  
KHMVQKKGLVVHMINSTFFEVMTSKKS-

>MS|comp99629\_c0  
VTKWEWKKTSHLIESRKR DAGVLRANGVDVIVLIFGAACQQGSPELKGSLGRVVMLVL  
FLTLMFLYTSYSANIVALLQSSSHIKTLDDLHSHRIKFGVHDTVFNRYFSTATEPVRK

## 7. SNMP protein fasta sequences of *M. separata*

Complete ORF:

>MS|comp162080\_c0

MLGKHSKLIFAVSIGFLVVAIIMASWGFQKVVDKQIQKSVQLENDSLMFDKWLKLPMLD  
FKVYVFNVNTNVEEVNKGEKPILEEIGPYVYKQYRERTVLGYGPNDTIKYMLRKRFEFDAE  
ASGGLTEDDEVTVIHFSYLAALLTVHDMMPSLVGVINKALEQFFPSLEDAFLRVKVRDLFF  
DGIYLSCDGDNAALGLVCGKIKGDLPTMRMAEGSNGFYFSMFHMRNRSETGPYEMNRG  
RDNIYELGNIVSYKQGEIMPMWGDKYCGQINGSDSSIFAPINEANVPQKLYTFEPDICRSLY  
VDLVEKRELFNISAYYYEISESALAAKSANHDNKCFCRKNWSANHDGCLLMGLLNLMPC  
QGAPAIASLPHFYLGSEELLEFFQSGIAPQREKHNSHVYIDPTTGVVLSGVKRLQFNIELRK  
IDTIPQLSSVPTGLFPMLWLEEGATIPDSIQQELRDSHKLLGYVEVARWLLLTVAVIAVIASA  
VAVARANALLSWPRNSNSVSFILGPSVT

>MS|comp162251\_c0

MLLPKELKYSIAIAGGVAVFGLIFGWVLFVILKQKEMALSCKTDVRKMWETIPFALE  
FKVYLFNYTNAEEVQKGAKPILKEIGPYHFDEWKEKVEIEDHEEDDTITYKKRDTFYFNP  
ELSAPGLTGEEIVVMPIHIFMLGMALTVNRDKPAMLMVGMKAMNGIFDNPPDIFMRVKAL  
DILFRGIIINCARTEFAPKATCTALKKEGVSGLIIEPNNQFRFSIFGTRNNTIDPHIITVKRGIQ  
NVMDVGQVVAVDVGKPEQTIWKGACNEYQGTDTGTVFPPFLTENDRIQSFSSTDLCRSFKPW  
YQKKTSYRGIKTNRYIANIGNFAEDPELQCFCPPDKCPPKGLMDLAPCIKAPMYASMPH  
YLESDPALLNNVKGLNPDINQHIEIDFEPISGTPMVAKQRIQFNLQLLKTDKIDLFKDLG  
DIVPLFWIEEGLALNKTFVNMLKHQLFIPKRVVGVLRWWMVVSFGSLGAVIGIVYHFRDHI  
MRLAVSGDTKVSKVTPEEGQEQLDISVIGAQAQEPAKINI-

**Supplemental data S7. Amino acid sequence of Opsins, CSPs, OBPs, ORs, GRs, IRs and SNMPs from organisms other and *M. separata* used in phylogenetic analyses.**

**1.opsins**

>BmorCeropsin

MSISMDAGPGFAALQSWSSQVAAFGNSNQTVVDRVSPPEMLHLIDAYWYQFPPMNPLWHA  
LLGFTIGVLGFISSMMGNGMVIIYIFMSTKSLKTPSNLLVVNLAFSDFLMMCAMSPAMVINC  
YNETWVFGPFACELYGCAGSLFGCASIWTMTMIAFDRYNVIVKGIAAKPMTNNGALLRIL  
GIWAFSLAWTVAPFFGWNRYVPEGNMTACGTDYLTQDWFSRSYIVVYSVFVYFAPLLLIV  
YSYYYIVQAVSAHEKAMREQAKKMNVASLRSSEAANTSTECKLAKVALMTISLWFMWAW  
TPYLVINYTGILESAPISPLATIWGSLFAKANAVYNPIVYGISHPKYQAALYKRFPVLQCHST  
TTDEASSVASGTTVMEEKPTA-

>Bmoropsin2

MRREAARRVVAARRAANAAPGRVVRGKMSSQCLWHACRALSAGLLLMLLGGAMAVI  
GYADTLSVAEEIRGNATVSVKDEARGFHLNLSYAGPIVMGFGGFIVVAACVMTFEARD  
SAAKVTPARPQTLPRPIPRRGPPCTAPARLDQLGVYRLPHVLPPLHALPLAPLPPFRHRPSS  
HTRNAADERGKGRKARFGSAPDLRIGSTRAALPVSALRRPLRRYALSVDPEPPQSAVSASAA  
DSECGSQSSLALDLHGSGACAGVTLRVRDNTRRRPLARQQRLRDDTIQPTPVD SMNNINV  
IQECTSGTSWEDTGDNTTIEMTHLSVDNEIRACSAPPANSPSTPHPADTCVTIFQEDDKDI  
THEPPSSQQSVSEVWHQRTTELRTHRNYGAHFAAFKSSGAGAVEMLGDLGDDLAAMP  
EHWLTFPAPPASAHTALALLYIFFTAAALLGNGLVIFVFSTTKSLRTSSNLLILQLAILDFIMM  
AKAPIFIYNSAMRGFATGTIGCQIFSVMGAYSGIGAGMTNACIAYDRHSTITRPLDGRLSKG  
KVLLMMAFVWIYCTPWALLPLLKIWGRYVPEGYLTSCTFDYLTNTFDTKLFVACIFVCSY  
VFPMSMIIYFYSIVKQVFAHEAALREQAKKMNVESLRANQSGASQSAEIRIAKAALTVCF  
LFVASWTPYGVMLIGAFGDQQLLTPGVTMIPAVACKAVACIDPWVYAISHPKYRQELQR  
RMPWLQINEPDDTTSTATSNTVSSAPPAAPA

>Bmoropsin1

MISLDPGPGMAALQAWGGQVAAYGAANQTVVDKVPDMLHMVDPHWYQFPPMNPLW  
HALLGFTIGVLGFISISGNGMVIIYIFMSTKSLKTPSNLLVVNLAFSDFLMMCAMSPAMVVN  
CYNETWVFGPFACELYACAGSLFGCASIWTMTMIAFDRYNVIVKGIAAKPMTNNGALLRI  
LGIWAFSLAWTLAPFFGWNRYVPEGNMTACGTDYLSKDWFSRSYILIYSVFVYFAPLLLII  
YSYFFIVQAVAAHEKAMREQAKKMNVASLRSSEAANTSAECKLAKVALMTISLWFMWAWT  
PYLVINYTGVFESAPISPLATIWGSLFAKANAVYNPIVYGISHPKYQAALYARFPSLQCQSAP  
PDDGGSVASGATAVSEEKPA-

>Bmoropsin-Rh3-like

MDTVPKGINNLTYLKRDDHALFSSKYDDETLTKGDIKLWKRRRRMSEILDRRSNVSGEVK  
ETRLPIKYSKYEVNELVSSEANNEVLIKKFKELWPVNLWRRFGLFTDDYLHLVNPYWLSF  
APPHPLLHYGLGAFYIMMTTVGSTGNALVMFMYFSLPICLVNFRCSRSLRTPGNILVANLAL  
SDFMMLAKTPIFIFNSFNLGPALGKTGCVIYGFVGGTLGTTSAILTAISLDRYWAVRPLEP  
LRALTAIRARLMAIAAWIYATLFAIIPALDIGYGRYVPEGFLTSCSFDYLTEELPPRYFIFVFFC  
AAWLAPFCTISYCYISIFRVVCSRNITTKNQEQLSTRHVKERTKRKAEIKLAFLVIVVIAL  
FFISWTPYAIVALLGIFGKKDLIKPLTSMIPALFCKTAACINPFYIITHPKFRKEFKRMLSRDK  
TERSGTIKTIGYYTEASKFHRPSKDFSDTEVEIVEMKDIPIYRNEDTTNTVEEKINTVSAKLA

KREGSQKSQSSISMKSFEENVVSPPSWYCKPKFAKKKSFHRRSTHSMVVSQNTDPTV-

>Bmoropsin-Rh-like

MRSALYSSLNILWKSNSRAVYHVPTRQAGSGLAEYPGTPLASHGRPGFEDTHVMIFIGFGF  
LMTFLKKYSYSALGFNWLLAALVIQWALLCQSFYHMKNNTIYVTKKSLLEADIMSATVLI  
TFGALLGVASGLQLLFIAIVETAACLNMWLVDVFKASDVGGSAIHTFGAYFGIGVSMAL  
LKSKNKDTPTTNGNTTPSVDLNAPSYISDVTAMIGSIFLWIYWPSFNSGLTNTDAEYQRA  
VVNTYLSLAAATVTTFLVSSALNEHKGKFDMVHIQNSTLAGGVAVGSVNCMQIGAGGAV  
AIGIGAGILSVLGYRYLTPKLTGKIGILDTCGVNHLHGMPGIYSGVLSVLFAGLATSDAYGAE  
LGTVFSGIGQNGRTIGQQALNQFLALVVTLVLSLNGRTIGQQALNQFLALVVTLVLSLVSG  
FLTGKKQFVSTSEVPKRL-

>Bmoropsin5-like

MGVFGALLNGWLFATFIHSHLLIFKSHILVFNLC AASLGRNLLGFPFSGSSAVAKRWLFGPS  
CCQLFAFFNQFFGVFQMTSIFVLILERYIQVKFYKREKSVYIRLYWTLIAVSWINSFLFATPP  
LFGYGLYSCDTTGTSTFLWPSMSSGAKQLGYAVPYILICGLPIVAMFYVMGKALRLEKIF  
YKGEQQREQKCLTQSAHAVCVGTLALWIPAAVLAGWQWVPLLIKGYRPHVPPTLALIASI  
ASEAATTVPVLCYLAVDERLRAALLGRMRKQYALLQPERAKIYKRV-

>Bm\_Pteropsin

MTSFLENMNDTVTKAYDEGFLLMPRWGYVASAFVFLFLIGFFGFFLNLMVILLMFKDRQL  
WTPLNIIILFNLCSDFSVSVLGNPFTLISALFHRWIFGHTMCVLYGFFMALLGITSITTLTVIS  
FERYLMVTRPLTSRHLSSKGAVLSIMFIWTYSLALTPPLLGWGNYVNEAANISCSVNWHE  
QSTNTLYIMFLFAMGQILPLSVITFSYVNIIRTLKRNSQRLGRVSRAEARATAMVFIMIIAF  
TVAWTPYSLFALMEQFATEGIVSPGASVIPALVAKSSICYDPLIYVGMNTQFRQSIKRIFGIH  
TKSKNSHTERGYNNTLMSPAHKLSLNNTKFNSETNSSTATKALKDKR-

>Bmorparapinopsin-like

MTSFLENMNDTVTKAYDEGFLLMPRWGYVASAFVFLFLIGFFGFFLNLMVILLMFKDRQL  
WTPLNIIILFNLCSDFSVSVLGNPFTLISALFHRWIFGHTMCVLYGFFMALLGITSITTLTVIS  
FERYLMVTRPLTSRHLSSKGAVLSIMFIWTYSLALTPPLLGWGNYVNEAANISCSVNWHE  
QSTNTLYIMFLFAMGQILPLSVITFSYVNIIRTLKRNSQRLGRVSRAEARATAMVFIMIIAF  
TVAWTPYSLFALMEQFATEGIVSPGASVIPALVAKSSICYDPLIYVGMNTQFRQSIKRIFGIH  
TKSKNSHTERGYNNTLMSPAHKLSLNNTKFNSETNSSTATKALKDKRVFYEDASDVTNQE  
YHRQYTRNPDLCTIQENKTVSDTRSGESAYDDSSSNRKIDMFGESCRVNEKSPVLTIMD  
SERLLFSKVPCKRDETEASSSNVYGNTAFEEHATDDTMNDNSNAENDYKNYVRHKMIR  
QSFSLDFPRYSSENKRRKLSIETKLESMLQPKSFLKGTISKLFDFHEYKQGHDSFKSYLCKDKS  
GTGNDEL-

>Dpleopsin-LW

MAITSMDPGPGAAALQAWGGQMAAFGSNETVVDKVLDPMLHLIDPHWYQFPPMNPMPW  
HGLLGFVMGVLGFISITNGMVVYIFTTKTLKTPSNILVVNLAFSDFCMMAIMAPPMLIN  
CYNETWVFGPLACQLYACAGSLFGCGSIWTMTMIAFDRYNVIVKGLAAKPMTINGALLR  
VLGIWAFSLAWTVAPMFGWGRYVPEGNMTACGTDYFDKSFANRSYIVIYSVFCYFAPFLI  
IYSYFFIIQAVAAHEKAMREQAKKMNVASLRSSDQANTSAECKLAKVALMTISLWFWMAWT  
PYLVINFCGIFDGAPISPLATIWGSVFAKANAVYNPIVYGISHPKYRAALYARFPALSCQASS  
DDNVSAASAATACTEEKPSA-

>Dpleopsin-BL

MATNFTEDIGPMAYPIKMVSQEVVEHMLGWNIPPEHQDLVHEHWRNFPVSKYWHFGLA

FIYTLMLASMTGNGIWIWIFSTSKSLRSPSNMFVINLAIFDFMMLLEMPLLVLSNFHQRL  
GYQLGCDIYAVLGSLSGIGGAINAVIAFDKYKTISSPLDGRLNHTQAALLILFTWVWATPF  
SFLPAFRVWGKYVPEGFLTTCSEDFLDEDEDTRVFMCFVWSYVIPMCCICYFYSKLFSAV  
RLHERMLKEQAKKMNVKSLAANKDDSGKSVEIRIAKVAFTIFFLVCAWTPYAFVAMTG  
AFGDRSILTPVATMIPAVCAKVVSCLDPWVYAINHPRYRAELQKRVPMWGVREADPDNTS  
NVSGATAQTQNPAAEA-

>Dpleopsin-UV

MIPTITMDNDTDNINVYGAYFAPLRSSEGTKMLIDGLTGEDLAAPVEHWHTYPSPPASAHT  
ALALLYCFFTAALIGNGMVIFIFLTTKSLRTSSNLLILNLAISDFIMMAKAPIFIYNSALRGF  
AAGPVGCCQIFSVMGAYSGIGASMTNACIAYDRHSTITRPLDGRLSQGKALLMIAFVWIYAT  
PWSLLPLFKVWGRFVPEGYLTSCTFDYLSNTFDTKLTVACIFTCYVFPMTMIIYFYSIVK  
QVFAHEAALREQAKKMNVESLRSNQNASAEIRIAKAALTVCFVSWTPYGVMAI  
GAFGDQRLTPGVTMIPAVACKTVACIDPWVYAIHPKYRQELQRRMPWLQINPDDNVS  
NTTNGTTNSTAAPT-

>Dmelopsin1

MESFAVAAAQLGPHFAPLSNGSVVDKVTDPMAHLISPYWNQFPAMDPIWAKILTAYMIMI  
GMISWCGNGVVIYIFATTKSLRTPANLLVINLAISDFGIMITNTPMMGINLYFETWVLGPMM  
CDIYAGLGSAFGCSSISWCMISLDYQVIVKGMAGRPMTIPLALGKIAYIWFMSIWC  
PAFGWSRYVPEGNLTSCGIDYLERDWNPRSYLIFYSIFVYIPLFLICYSYWFIIAAVSAHEK  
AMREQAKKMNVKSLRSEDAEKSAEGKLAKVALVTITLWFMWTPYLVINCMGLFKFEG  
LTPLNTIWGACFAKSAACYNPIVYGISHPKYRLALKEKCPCCVFGKVDDGKSSDAQSQT  
ASEAESKA-

>Dmelopsin2

MERSHLPETPFDLAHSRPFQAQSSGNGSVLDNVLPDMAHLVNPYWSRFAPMDPMMSKI  
LGLFTLAIMIISCCGNGVVYIFGGTKSLRTPANLLVLNLAISDFCMMASQSPVMIINFY  
TWVLGPLWCDIYAGCGSLFGCVSIWCMIAFDRYNVIVKINGTPMTIKTSIMKILFIWM  
MAVFWTVMPLIGWSAYVPEGNLTACSIDYMTRMWNPRSYLITYSLFVYIPLFLICYSYW  
FIIAAVAHEKAMREQAKKMNVKSLRSEDCDKSAEGKLAKVALTTISLWFMWTPYLV  
CYFGLFKIDGLTPLTTIWGATFAKTSAVYNPIVYGISHPKYRIVLKEKCPMCVFGNTDEPKP  
DAPASDTETTSEADSKA-

>Dmelopsin3

MESGNVSSSLFGNVSTALRPEARLSAETRLGWNVPPEELRHIPEHWLTYPEPPESMNYLL  
GTLYIFFTLMSMLGNGLVIWVFSAAKSLRTPSNILVINLAFCDFMVMKTPIFIYNSFHQGY  
ALGHLGCQIFGIISYTGIAAGATNAFIAYDRFNVITRPMEGKMTHGKAIAMIIFYMYATP  
WVVACYTETWGRFVPEGYLTSCTFDYLDNFDFRLFVACIFFFSFVCPTTMITYYYSQIVG  
HVFSHEKALRDQAKKMNVESLRSNVDKNKETAIRIAKAAITICFLFFCSWTPYGVMSLIG  
AFGDKTLLTPGATMIPACACKMVACIDPFVYAIHPRYRMELQKRCPWALNEKAPESSAV  
ASTSTTQEPQQTAA-

>Dmelopsin4

MEPLCNASEPPLRPEARSSGNGDLQFLGWNVPPDQIQYIPEHWLTQLEPPASMHYMLGVF  
YIFLFCASVGNMVIWIFSTSKSLRTPSNMFVLNLAVFDLIMCLKAPIFIYNSFHRGFALG  
NTWCQIFASIGSYSGIGAGMTNAAIGYDRYNVITKPMNRNMTFTKAVIMNIIWLYCTPWV  
VLPLTQFWDRFVPEGYLTSCTFDYLSNDFDFRLFVGTIFFFSFVCPTLMILYYSQIVGHV  
SHEKALREQAKKMNVESLRSNVDKSKETAIRIAKAAITICFLFFVSWTPYGVMSLIGAFG

DKSLLTPGATMIPACTCKLVACIDPFVYAISHPRYRLELQKRCPWLGVNEKSGEISSAQSTT  
TQEQQTAA-

>Dmelopsin5

MHINGPSGPQAYVNDSLGDGSVFPMGHGYPAEYQHMVHAHWRGFREAPIYYHAGFYIAF  
IVLMLSSIFGNGLVIWIFSTSKSLRTPSNLLILNLAIFDLFMCTNMPHYLINATVGYIVGGDL  
GCDIYALNGGISGMGASITNAFIAFDYKTIKSNPIDGRLSYGQIVLLILFTWLWATPFSVLPL  
FQIWGRYQPEGFLTTCSEFDYLTNTDENRFLVVRTIFVWSYVIPMTMILVSYYKLFTHVRVHE  
KMLAEQAQKMNKSLSANANADNMSVELRIAKAALIYMLFILAWTPYSVVALIGCFGE  
QQLITPFVSMPLCLACKSVSCLDPWVYATSHPKYRLELERLPWLGIREKHATSGTSGGQE  
SVASVSGDTLALS VQN-

>Dmelopsin6

MASLHPPSFAYMRDGRNLSLAESVPAEIMHMVDPYWYQWPPLEPMWFGIIGFVIAILGTM  
SLAGNFIVMYIFTSSKGLRTPSNMFVFNLAFSDFMMMFTMFPPVVLNGFYGTWIMGPFLC  
ELYGMFGSLFGCVSIWSMTLIAYDRYCVIVKGMARKPLTATAAVLRLMVVWTCGAWAL  
MPLFGWNRYPVEGNMTACGTDYFAKDWWNRSYIIVYSLWVYLTPLLTIIFSYWHIMKAVA  
AHEKAMREQAKKMNVASLRNSEADKSKAIEIKLAKVALTTISLWFFAWTPYTIINYAGIFES  
MHLSPSTICGSVFAKANAVCNPIVYGLSHPKYKQVLREKMPCLACGKDDLTSDSRTQAT  
AEISESQA-

>Dmelopsin7

MEAIIMTTLPLNTTDAGDSSFWLTGALSLEMLANSSSHSHSTGTTSTAGSSATESSAVNVG  
KDHDKHVNDVSTGLSNYSNPSYIHYRDKYDLSYIAKVNPFWLQFEPPKSSTFLIMAAL  
YCLISVVGCVGNFVIFMFANRKSRLTPANILVMNLAICDFLMLIKCPIAIYNNIKEGPALG  
DIACRLYGFVGGLSGTCAGTLTAIALDRYVNVVHPLQLRRCRSLRSYLIILLIWCYSFLFA  
VMPALDIGLSVYVPEGFLTTCSEFDYLNKEMPARIFMALFFVAAYCIPLTSIVYSYFYILKVVV  
TASRIQSNKDKAKTEQKLAFIVAIIIGLWFLAWSPYAIVAMMGVFGLERHITPLGSMIPALF  
CKTAAACVDPYLYAATHPRFRVEVRMLFYGRGVLRVSTTRSSYMTRSRSSTHRLRTSTTG  
EGMGMDHRMENYLMNMMVPEETEENEEIVVVAEINNSISSVMEQSKF-

>Hmelopsin-BL

MATNYTDDIGPVAYPLKMVSQEVVEHMLGWNIPPEEHQDLVHEHXRNFPVSKYAHFVLA  
LIYSFLILASVSGNGIVIWIFSTSKSLRTASNMFVINLAVFDMMMMIEMPMLVLNSFYQRLV  
GYQLGCDIFAVLGSLSGIGGAINAVIAYDRYKTISSPLDGRLNRVQASLLILFTWLWALPFT  
IMPAFRIWGRFVPEGFLTTCSEFDYFTEDQDTKVFMCFAWSYCIPMLLLCYFYSKLFGAV  
RLHERMLKEQAKKMNKSLAANKEDAGKSIEIRIAKVAFTIFFLVCSWTPYAFVAMVGA  
FGDRSILTPVTMIPAVCAKIVSCIDPWVYAINHPRYRAELQKRLPVMGVREADPDTVSTS  
SGATAQTQNPTAEA-

>Hmelopsin-LW

MAITSLDXGPGAAALQAWGGQMAAFGSNETVVDKVLDPMLHLIDAHWHQFPPMNPLW  
HGLLGFVIGVLGFISVTGNMNVYIFTTTKSLKTPSNILVFNLAFSDFLMMFMMPMPPVIN  
CYNETWVFGPLACQLYACAGSLYGCVSIWTMTMIAFDRYNVIVKGIAAKPMTINGALLRV  
FFIWAFLAWTVAPXFGWGRYVPEGNMTACGTDYFDQSISSNMTYILLYSIACYAPFLIIY  
SYFFIVQAVAAHEKAMREQAKKMNVASLRSSDQANTSAECKLAKVALMTISLWFMWTP  
YLVINYAGIFKMTISPIVTIWSVFAKANAVYNPIVYGISHPKYRAALYARFPALSCQTAPE  
DTGSVASAATATEEKPSA-

>Hmelopsin-UV

MENETQNHNVY GAYFAPLRSSDGVKMLVDGLSSAELEFIPEHWLSYPAPPASAHTALALM  
YCFFTAALIGNGLVIYIFATTKSLRTSSNLLILNLAVFDFIMMAKAPIFIYNSAMRGFAIGSL  
GCQIFALVGSYSYGIGAAMTNLCIAYDRHSTITRPLDGRLSRGKALLLIACVWIYTTPWSLLP  
LFRIWGRFVPEGYLTA CSFDYLTNTFDTKLFVACIFAYAIPLCLIMYYYSGIVKQVFAHEA  
ALREQAKMNVESLRSNHNAAESAEIRIAKAALTVCFLYVASWTPYGVMSLIGAFGDQ  
QLLSPGVTMIPAACKGVACIDPWVYAI SHPKYRQELQRRMPWLQIREPDDNVSTGTNNTT  
NSAAPAATA-

>Harmopsin-BL

MASNYSEDIGPMAYPLKMVSKEVVEHMLGWNIPPEEHQDLVHDHWRNFPVSKYWHYVL  
ALIYTMLMTTSLGNGIWIWIFGTSTKSLRSPSNMFVINLAVFDLMMMLEMPLLVINSFYQR  
LVGYQLGCDIYGVLSLGGIGAITNAVIAFDRYKTISCPLDGRINKVQAFILIAFTWFWAL  
PFTILPALRIWGRFVPEGFLTTCSDYFTDDQDTKVFGCIVVWSYCIPMTLICFYFYSQLFG  
AVRLHERMLSEQAKMNVKSLAANKEDASRSVEIRIAKVAFTIFFLCAWTPYAFVTMTG  
AFGDRNLLTPIATMVPVAVCCKVVSCIDPWVYAINHPRYRAELQKRLPVMGVREQDPDSVS  
TTTSVATAQSTAQPAAEA-

>Harmopsin-LW1

MPLTLDPGGIAALQAWGGQVAAYGASNQTVVDKVPDMLHMVDPHWYQFPPMNPLW  
HGLLGFTIGCLGFISISGNGMVIYIFMSTKSLKTPSNLLVNLAFSDFLMMCAMSPAMVVN  
CYNETWVWG PLACELYACAGSLFGCASIWTMTMIAFDRYNVIVKGIAAKPMTNNGALLR  
ILGIWVFLSLAWTLAPFFGWNRYVPEGNMTACGTDYLSKDWFSRSYILIYSVFCYFMPLLLII  
YSYFFIVQAVAAHEKGMREQAKKMNVASLRSEAANTS AECKLAKVALMTISLWFWMAWT  
PYLVINYTG VFESAPISPLATIWGSLFAKANAVYNPIVYGISHPKYRAALYQRFPSLSCQASP  
DETGSVASGATAVSEEPAA-

>Harmopsin-LW2

MADSGPGMAALQAWGGQAVTHGAANQTVVDKVPADMLHMVDAH WYQFPPMNPLWH  
ALLGFTIGVLGFISIAGNGMVIYIFSSTKSLKTPSNLLVNLAFSDFLMMCAMAPAMVINC  
YNETWVFGPFACELYGCAGSLFGCASIWTMTMIAFDRYNVIVKGIAAKPMTKSGALQRIL  
GIWVFLSLAWTLAPFFGWNRYVPEGNMTACGTDYLSKDWFSRSYILVYSIFVYFLPLLLIIYS  
YYFIVQAVTAHEKAMREQAKKMNVASLRSEAANTS AECKLAKVALMTISLWFWMAWTPY  
LVINYTG VFESAPISPLATIWGSLFAKANAVYNPIVYGISHPKYRAVLYQKFPALACTVSPDE  
GGSVATGATVVSDEKPAA-

>Harmopsin-UV

MYNQ TENSYYDAHFAAYKSGGAGDTEMLGAGLTGEDLAMVPEHWLSFPAPPASAHTAL  
ALLYIFFTAAALVGNGLVIFIFSTTKSLRTSSNLLILQLTILDFIMMAKAPIFIYNSAMRGFAT  
GTFGCQLFALMGAYSGIGAGMTNACIAYDRHSTITRPLDGRLSRGKVLLMIAFVWIYSTP  
WALLPLFKIWGRYVPEGYLTSCTFDYLTNTFDTKLFVACIFACSYVFPMSMIIFYSGIVKQ  
VFAHEAALREQAKMNVESLRANQNAGAESA EIRIAKAALTVCFLFVASWTPYGVMALI  
GAFGNQQLLTPGVTMIPAVACKAVACIDPWVYAI SHPKYRQELQRRMPWLQIQEPDDTAST  
ATSNTVSSAPAAAPA-

>MS|comp149511\_c0

MSLSLDPGGIAALQAWGGQVAAYGASNQTVVDKVPDMLHMVDPHWYQFPPMNPLW  
HGLLGFTIGCLGFISITGNGMVIYIFMSTKSLKTPSNLLVNLAFSDFLMMCCMSPAMVVN  
CYNETWVWG PLACELYACAGSLFGCASIWTMTMIAFDRYNVIVKGIAAKPMTNNGALLR  
ILGIWVFLSLAWTLAPFFGWNRYVPEGNMTACGTDYLSKDWFSRSYILIYSV FVYFMPLLLI



IYSYFFIVQAVAAHEKGMREQAKKMNVASLRSSEAANTSAECKLAKVALMTISLWFM  
AWTPYLVINYTGVFESAPISPLATIWGSLFAKANAVYNPIVYGISHPKYRAALYQRFPSLSCQAS  
PDESGSVASGATAVSEEKPA-

>MS|comp158503\_c0

MAENGPMAALQAWGGQAAVYGAANHTVVDKVPADMLHMVDAHWWYQFPPMNPLWH  
ALLGFTIGVLGFISITGNAMVIYIFMTAKNLKTPSNLLVVNLAFSDFLMMVAMAPAMVINC  
YNETWVFGPFACELYGCAGSLFGCTSIWTMTMIAFDRYNVIVKGIAAKPMTKTGALQRIL  
GIWLFSLAWTLAPFFGWNRYVPEGNMTACGTDYLSKDWLSRSYIIVYSVFVYFLPLLLIY  
SYYFIVQAVTAHEKAMRDQAKKMNVASLRSSEAANTSAECKLAKVALMTISLWFM  
AWTPYLVINYTGVFESAPISPLATIWGSLFAKANAVYNPIVYGISHPKYRAVLYQKFPALACTVSP  
DEAGSIATNATVVADEKSEKPA-

>MS|comp163867\_c0

MATNYTEDIGPMAYPLKMVSKEVVEHMLGWNIPPEEHQDLVHDHWRNFPVANKYYHYVL  
ALIYTMLMVTSTFLGNGIWIWIFGTSKSLRSPSNMFVINLAVFDMMLLEMPLLIMNSFYQ  
RMVGYQLGCDIYAVLGSLSGIGAITNAVIAFDRYKTISCPLDGRINRVQAFILIAFTWFWA  
LPFTILPALKVWGRFVPEGFLTTCSEFDYFTDDQDTKVFVVCIFVWSYAIPMTLICFYFSQLF  
GAVRMHERMLSDQAKKMNVKSLAANKEDASRSVEIRIAKVAFTIFFLVCWTPYAFVT  
MTGAFGDRNLLTIATMVPVAVCCKVVSCIDPWVYAINHPRYRAELQKRLPVMGVRSDP  
DSVSTTTSVATAQSTAQPAAEA-

>MS|comp164210\_c1

MYNQ TENSYYDAHFAPFKSGGPSGVEMLGEGLTGDELAAPPEHWLSFPAPPASAHTALAL  
LYIFFTAAALVGNGLVIFIFSTTKSLRTSSNLLILQLAILDFIMMAKAPIFIYNSAMRGFASGT  
FGCQLFALMGAYSIGAGMTNACIAYDRHSTITRPLDGRLSRGKVLLMIAFVWIYSTPWA  
LLPLFKIWGRYVPEGYLTSCFTDYLTNTFTDKLFVACIFACSYPFMSMIIFYSGIVKQVEA  
HEAALREQAKKMNVESLRANQNASAESAERIAKAALTVCFVAVSWTPYGVMLIGAF  
GNQQLLTPGVTMIPAVACKAVACVDPWVYAI SHPKYRQELQRRMPWLQIQEPDDSVSTAT  
SNTVSSAPPAAPA-

>MS|comp165164\_c0

MQTLFEDLEDECPWYYFDGSYKLLLGACLFIFGVFGVLLNGWLFATFIHSHLLVFRSHILV  
LNLCTASLGRNLVGFPPFAGSSAVAKRWLFGPSCCQLFAFLNQFFGVFQMTALFVAVLERYL  
LANYYRRERTLYTRFYWSLVGLSWFNSVIFSTPPLFGYGKYSKDYSTGTTCTFLWPSTHSGA  
KHIGFSIPYILVCGVIPVIAVFYMGKAVRLERIFYKGEVQKEQTRLTQTIHAVCVATLALWI  
PAAILVGWQWLPLLIYGYRPHVPPALAVIAPIASEAATSVPVLCFIAGDERLRAALLGRMR  
KHYALLQPERAKRYNRA-

>MS|comp156702\_c0

LDDLKQWKRRRRSADNFKKLNDESGILKVTVGAVKELASYQNSVDIVETTALSVDNK  
LALIAKFIERWPVERWRSGLFSDDYLLRINSHWLEFPDPDSWIQYTLGSTYVLLAGTGAF  
GNVLVLLMYIRCSLRTPGNILVANLALSDFLMLAKTPIFIFNSFNLGPALGKTGCVIYGFV  
GGLTGTTSIATLSAIALDRYWAVVRPLEPLRALTAIRARLLAIGAWLYACIFAIIPALNIGYGS  
YVPEGYLTSCSEFDYLTEDFSPRCFIFVFFCAAWLAPFCTITFCYISIFRVVFNRSMSYGNQD  
QRLSSRHVKERTKRKAEIKLAFLVMAVIALFFISWTPYAVVALLGITGRKDLVTPITSMIPAL  
FCKTAACINPFYIITHPKFRKEFKMLYRDKSKRMRGTLRTTDYCTDTRMHRPSKDLSD  
TDVEIVEMKDIPYQTDDEKRDVKIKTISSKVAERQDSQTSMQTIKSLQDSVSPPSWYMKPQ  
FKKKRSFHRRSTRTNSSQTSTSDPII-

>MS|comp41007\_c0

VESLRANQNAGAESAERIKAALTVCFVSWTPYGVMLIGAFGNQQLTPGVTMIPA  
VACKAVACIDPWVYAISHPKYRQELQRRMPWLQIQEPDDTASTATSNTVSSAPAAAPA-

>MS|comp44349\_c0

ENSYYDAHFAAYKSGGAGDTEMLGAGLTGEDLAMVPEHWLSFPAPPASAHTALALLYIFF  
TAAALVGNGLVIFIFSTTKSLRTSSNLLILQLAILDFIMMAKAPIFIYNSAMRGFATGTFGCQ  
LFALMGAY-

>Pxylopin-BL

MATNYTMADYGIVAQPMKMVSQEVVEHMLGWNIPPEHQDLVHMHWRAFPAVSKFWHY  
GLALIYTCLMLTSLTGNISIVIWFSTSKSLRTASNMFVINLAVFDLMMMIEMPLLIMNSFQQ  
RMVGYQLGCDIYATLGSLSGIGGAISNAVIAFDRYKTISCPDGRINKVQAALLLFTWLWS  
VPFTALPLFKIWGKFVPEGFLTTCSEFDYFTDDQDTKVFVAAIFVWSYCIPMSLICIFYSQLF  
GAVRLHERMLKDQAKKMNVKSLASNKDDAGKSVEIRIAKVAFTIFFLVCGWTPYAFVA  
MTGAFGDRSLLTPVATMVPVAVCCIVSCIDPWVYAINHPRYRAELQKRLPVMGVREADPD  
SVSTNTSLATAQAANPEA-

>Pxylopin-LW

MGFANMDPGPGMAALQAWGGQVAAYGASNQTVVDKVLPMIHMIDPHWYQFPPMNPL  
WHGLLGFTIGVLGFVSITGNMVIYIFTSTKSLKTPSNLLVVNLAFSDFLMMCCMSPPMV  
VNCYNETWVFGPLACELYACAGSLFGCASIWTMTMIAFDRYNVIVKGIAAKPMTINGALL  
RILGIWLFSLAWTLAPFFGWNKYVPEGNMTACGTDYLSKDWFSRSYILVYAVFVYFMPLL  
LIISYFFIVQAVAAHEKGMREQAKKMNVASLSSEAAANTSAECKLAKVALMTISLWFMA  
WTPYLVINFTGVLDGAPLTPLATIWGSLFAKANAVYNPIVYGISHPKYRAELYKKFPSLAC  
QASPDESGSVASGTTTATEEKPA-

>Pxylopin-Rh3

MRLTHASAVITTLIITLQLSQTKNVTNPNCDTCACAVKSDASCENCFKVELDSLKQWKRR  
RRLCRVERSFDSDMLDVPNMVGSRRHQPVLATSLSTVAKFKQQWPVELWRQYLFTDDY  
LLLINPHWLKFPFPHAADVNSMGALYILMMLAGGTGNGLVLMYLRCRSLRTPGNILVAS  
LALSDFLMLAKTPVFIFNSFNLGPALGKTGCLYIGFLGGLTGCTSIATLAAIALDRYWAIAR  
PLEGLGTLTAVRARVLAVAAWLYAALFASVPAFDIGYGRYVPEGYLTSCSEFDYLTDEVKPR  
YFIFVFFCAAWVTPFATITFCYINILRVVICKRNVSTSSNDHRLSTRHVKEQAKKAEMKL  
AVLVIAVIALFFVSWTPYAIIALMGIFGNRDLITPTSSMIPALFCKTAACINPFVYIITHPKFRK  
EIKNLFSKGSRQYGGTMRTIGYTTDATTYHRPSKDSSETDVEVVEMKDIPFQEGEKRGK  
EGVKS VSGRLSEREGSQR SINESMKS YEGDVVSPPSWFRQPQFSKRSFHRRSTRSVVSFD  
TNAVL-

>TcasPteropsin

MANTLLLICLALLASAIALPATNDQLDKVTVNDVAANAVSPESKTDDSNDRDAATVEIT  
GITTVETPDPSSTPFHPQRAGSMFARFIDDIFQIPINVLQNVARLITSPFVQNKKTPEASAA  
SLKSQFRMKNFNSTEIGDELLIPVEGYIAAAVVLFCIGFFGFSNLTVIIFMLKERQLWSPLN  
IILFNLVVSDFLVSVLGNPWTFFSAINYGWIFGETGCTIYGFIMSLLGITSITTLTVLAFERYL  
LIARPFRRNALNFHSAALS VFSIWLYSLSLTIPPLIGWGEYVHEAANLSCSVN WEEKSPNST  
SYILYLFAFGLFLPLVIITFSYVNIILTMRRNAAFRVGQVSKAENKVAYMIFIMIAFLTAWSP  
YAIMALIVQFGDAALVTPGMAVIPALLAKSSICYNPVIYIGLNAQFQQAWMQKWKKNRRG  
SDALGTSRVMLETIHQACRDEKTDKLEKKTCKFCDFETDVSML-

>Tcasopsin-UV

MLHNLATPFHQARTMETMANHLGWNVPKDELIHIPQHVLVYPEPEASMHFLALIIYIGF  
FIMATIGNGLVIWIFSTSKSLRTASNMFVVNLAICDFAMMIKTPIFIYNSFYRGFALGHLGCQ  
IFAFIGSLSGIGAGMTNACIAYDRYTTITRPFDGKITRTRKALVMIIFVWGYTIPWAVMPLLEI  
WGRFAPEGFLTACSFYLDLTFDNHMFVTSIFICSYVIPMSMIIYFYSQIVSKVFSHEKALRE  
QAKKMNVESLRSNQSQASQSAELRIAKAAIACSLFVASWTPYAVLALIGAFGDQSLTTP  
GVTMVPACACKFVACLDPYVYAISHPKYRLELQKRLPWLAIKETAASETQSTTTENTTTQS  
ATTTT-

>Tcasopsin-LW

MSVMGEPNFIWAAQRSGYGGNLTVVVDKVLDPDMLHLVDAHWHYQFPPMNPLWHGILGF  
VIGVLGFVSIVGNGMVIYIFSSTKALRTPSNLLVVNLAFSDFLMLC MSPAMVINCYNETW  
VLGPLVCELYGMSGSLFGCASIWTMTFIALDRYNVIVKGLSAQPLTKKGAMLRILIIWVFS  
TLWTIAPFFGWNRYVPEGNMTACGTDYLTQDWVSRSYILVYAVWVYFVPLFTIIYSYWFIV  
QAVAAHEKSMREQAKKMNVASLSRSEAAQTSAECKLAKIALMTITLWFFAWTPYLVNFT  
GIFEGAKISPLATIWCSLFAKANAVYNPIVYGISHPKYRQALQKKFPSLVCAGEPDDTTSTA  
SGVTNVTTDEKPATA-

>Agamopsin1

MAAFVEPHFDAWTQSGGNMSVVDKVPPEMLHMVHPHWNQFPPMNPLWHSILGFAIFML  
GMISMTGNGCVMIYIFTNTKSLRTPSNLLVVNLAFSDFMMFTMGPPMVINCWHETWTFG  
PFACELYAMLGSLFGCASIWTMTMIAFDRYNVIVKGLAGKPMTNNGALLRILGVVWFALF  
WTLAPLFGWNRYVPEGNMTACGTDYLTQTWLSRSYIIYAIFVYWLPLLTIIYSYTFILKAV  
SAHEKNMREQAKKMNVASLRTQEAQNTSTEMKLAKVALVTISLWFMAWTPYLVINFTGIF  
KAAPISPLATIWGSFLFAKANAVYNPIVYGISHPKYRAALYQKFPSLSCQDAPVDDGQSVAS  
GATQASDEKA-

>Agamopsin2

MAAFVEPHFDAWTQSGGNMSVVDKVPPEMLHMVHPHWNQFPPMNPLWHSILGFAIFML  
GMISMTGNGCVMIYIFTNTKSLRTPSNLLVVNLAFSDFMMFTMGPPMVINCWHETWTFG  
PFACELYAMLGSLFGCASIWTMTMIAFDRYNVIVKGLAGKPMTNNGALLRILGVVWFALF  
WTLAPLFGWNRYVPEGNMTACGTDYLTQTWLSRSYIIYAIFVYWLPLLTIIYSYTFILKAV  
SAHEKNMREQAKKMNVASLRTQEAQNTSTEMKLAKVALVTISLWFMAWTPYLVINFTGIF  
KAAPISPLATIWGSFLFAKANAVYNPIVYGISHPKYRAALYQKFPSLSCQDAPVDDGQSVAS  
GATQASDEKA-

>Agamopsin3

MAAFVEPHFDAWTQSGGNMSVVDKVPPEMLHMVHPHWNQFPPMNPLWHSILGFAIFML  
GMISMTGNGCVMIYIFTNTKSLRTPSNLLVVNLAFSDFMMFTMGPPMVINCWHETWTFG  
PFACELYAMLGSLFGCASIWTMTMIAFDRYNVIVKGLAGKPMTNNGALLRILGVVWFALF  
WTLAPLFGWNRYVPEGNMTACGTDYLTQTWLSRSYIIYAIFVYWLPLLTIIYSYTFILKAV  
SAHEKNMREQAKKMNVASLRTQEAQNTSTEMKLAKVALVTISLWFMAWTPYLVINFTGIF  
KAAPISPLATIWGSFLFAKANAVYNPIVYGISHPKYRAALYQKFPSLSCQDAPVDDGQSVAS  
GATQASDEKK-

>Agamopsin4

MLKTEVLIFPDMAAFVEPHFDAWTQSGGNMSVVDKVPPEMLHMVHPHWNQFPPMNPL  
WHSILGFAIFMLGMISMTGNGCVMIYIFTNTKSLRTPSNLLVVNLAFSDFMMFTMGPPMV  
INCWHETWTFGPFACELYAMLGSLFGCASIWTMTMIAFDRYNVIVKGLAGKPMTNNGAL  
LRILGVVWFALFWTLAPLFGWNRYVPEGNMTACGTDYLTQTWLSRSYIIYAIFVYWLPLL

TIISYTFILKAVSAHEKNMREQAKKMNVASLRTQEAQNTSTEMKLAKVALVTISLWFMA  
WTPYLVINFTGIFKAAPISPLATIWGSLFAKANAVYNPIVYGISHPKYRAALYQKFPSLSCQ  
DAPVDDGQSVASGATQASDEKA-

>Agamopsin5

MMDHRPVGIFGPKSPQALTWTISVANLTVVDKVPPEMLHLVDTYWYQFPPLETKWHAAL  
ATTIGLLALISIVGNVCVILIFSSTKGLRTPSNLMVINLAFADFMMMFTMAPPLIINSYHETW  
VFGPLMCEIYGMFGSLSGCVSIWSMTMIAFDRYTVIVKGLSAKPLTYVGSVMRILVFWAN  
SLVWTLAPLFGWNRYPVEGNMSACGTDYLSKDWISVSYIYAYSVFVYWLPLLLIICYTYI  
LKAVSAHERNMREQAKKMNVASLRSSDASKTNAEIKLAKVALVTITLWFMAWTPYLVIN  
YAGIIDSSPISPLQTIWGSVFAKANAVYNPIVYGISHPKYRAALYKRFPALQLRKENATDQN  
SVASCTTAADQCET-

>Agamopsin6

SVDNRTPLCLVVGNCQRRETEMAAFAEPHFAWTQTVVSNVTVVDKVPPEMLHMVDAH  
WYQFPPMNPLWHSILGFAIFVLGVVSIIGNGCVIYIFTNTKALRTPSNLLVNLAFSDFLMM  
FTMAPPMVINCWHETWVFGPFACELYAMLGSLFGCASIWTMTMIAFDRYNVIVKGLAGK  
PMTNNGALLRILGIWAFSLLWTLAPLFGWNRYPVEGNMTACGTDYLSQDFTSRSYILYSG  
FVYYLPLFSIIYSYIYIQAUSAHEKNMREQAKKMNVASLRSQEAQNTSTEMKLAKVALVTI  
SLWFMAWTPYLVINYTGFKAAPISPLATIWGSLFAKANAVYNPIVYGISHPKYRAALYQKF  
PSLSCQDNSDDGQSVASAATGVSEEKPA-

>Agamopsin7

MPYYGPMQQPGLWGQPVANLTVVDKVPPEIMHLVDPHWSQFPPMNPLWHSIIGFVIFVLG  
VVSIIIGNGMVIYIFSTAKSLRTPSNLFIVNLALSDFLMMGTNAFTMVYNCWFETWSLGLL  
MCDLYAFFGSLFGCCSIWTMTMIALDRHNVIVHGLSGKPLTNTGAILRILLCWLIGVWGI  
LPMLGWNRYVPEGNMTACGTDYLTDDWFHKSILVYSVFVYYTPLFTIYAYFFIIKAVSA  
HEKNMREQAKRMNVQSLRSSDDGKSTEMKLAKVALVTISLWFMAWTPYTVINYTGVFK  
TASITPLATIWGSVFAKANAVYNPIVYGISHPKYRAALLRRFSLACSDGPPADDKSLASEA  
SGITSAGNPPTA-

>Agamopsin8

MGLVQLDNQTAYRPEALIGADQSGRLRYLGNVNPPEELVHIPEHWLQFPEPEASLHYLLGL  
LYIAFTIFSLVGNGLVIWIFIAAKSLRTPSNVFINLAICDFFMMAKTPIFIYNSFTKGFILGN  
LGCQIFGFVGSLTGIGAGATNALIAYDRYNTITRPFEGRLTQTKAIIFICLIWAYTIPWGVLP  
LEIWGRYVPEGFLTCTFDYLSGTFDTRLFVASIFTFSYVLPMSLIYYYSQIVSHVNVHEKS  
LREQAKKMNVESLRNQNQKASVEIRIAKAAITVCFLFVASWTPYAVLALIGAFGDKSLL  
TPGVTMFPACACKFVACLDPYVYAISHPRYRIELQKRLPWLAITETLPAENASTCTEQQDG  
NATTQS-

>Agamopsin9

MFLGNESISEGAMLMPMARTAGEMPKLLGWNLPPEEQYLVHDHWKGFPSPPYYMHLML  
AMIYFVLMNTSLIGNIVLWIFGTSKSLRNGSNMFIINLAIFDLLMMCEMPMFLVNSFSERL  
VGYGVGCSVYAALGSMGIGGAISNAVIAFDRYRTISNPLDGRLSRVQAGLLICTLWLWTM  
PFTLLPLFEIWGRYIPEGYLTTCSFDYLTDDPDTRVFGCIFTWAYVIPMIFICYFYARLFGH  
VRQHEMMLKNQARKMNVESLTANRSEKAQAVEMRIAKAAFTIFFLVCWTPYAIVTMI  
GAFGDRTMLTPFVTMVPVAVCCKIVSCLDPWVYAISHPKYRQELERRLPWMGIKEADDSVS  
TTESKATVVVDGAAGNGGDNAAN-

>Agamopsin10

KYVVRSGYVLPVDPLFVAKINPFWLRFDPSPAGEHYGLAVFYFLMMLFGVIGNALVVFMM  
YRYSRLRTPANYLVINLAVADFIIMMEAPMFIYNSIHQGPALGSIGCTVYALMGAVGGTVAI  
ATLTVISIDRYNVVVYPLNPNRSTTKLKCXYFLIAFTWAYGLLFASFPALIEIGLSRYTAEGYLT  
ACSFYLDRTYKARVFMFVYFVFAWLIPFAIISYCYARILIAVINANAQSSKSKNKTEVKLA  
GVVVGIIGLWFAAWTPYAVVAMMGVFGYEQYLTPLNSMIPAVFAKIAASIDPYFYAMNHP  
RYRQMLERMFCNRGADQGNSQYQTSHYTRGASRGGDSEGGGGGEESSGGGGVGRAPGG  
GNAGLGRGGTVRGGGGGRLIAGKGGGGANATGSTGGGGVKALKKQISNGDETSLEVS  
LEM-

>Amelopsin-BL

MLLHNKTLAGKALAFIAEEGYVPSMREKFLGWNVPPEYSDLVHPHWRAFPAPGKHFHIG  
LAIYSMLLMSLVGNCCVIWIFSTSKSLRTPSNMFIVSLAIFDIIMAFEMPMLVISSFMERMI  
GWEIGCDVYSVFGSISGMGQAMTNAIAFDRTYRTISCPIDGRLNSKQAAVIAFTWFWVTP  
FTVLP LLKVGWGRYTTEGFLTTCSDFLTDDDDTKVFVTCIFIWAYVIPLIFILFYSRLLSSIRN  
HEKMLREQAKKMNKSLVSNQDKERSAEVRIAKVAFTIFFLFLAWTPYATVALIGVYGN  
RELLTPVSTMLPAVFAKTVSCIDPWIYAINHPRYRQELQKRCKWMGIHEPETSDATSAQT  
EKIKTDE-

>Amelpterosin

MSLNRSTMEHVIYEDQVSPVMYIGAAIALGFIGFFGFTANLLVAIVIVKDAQILWTPVNVIL  
FNLVFGDFLVSIFGNPVAMVSAATGGWYWGKMLWYAWFMSTLGFASIGNLTVMAVER  
WLLVARPMQALSIRHAVILASFVWIYALSLSLPLFGWGSYGPEAGNVSCSVSWEVHDPV  
TNSDTYIGFLFVLGLIVPVFTIVSSYAAIVLTLKKVRKRAGASGRREAKITKMVALMITAFL  
LAWSPYAALAAQYFNAKPSATVAVLPALLAKSSICYNPIIYAGLNNQFSRFLKKIFDARG  
SRTAVPDSQHTALTALNRQEQRK-

>Amelopsin-LW2

MDTLNITTSFFIEVMPSNISTLTTTGPQFARQLMRFNNQTVVSKVPEEMLHLIDLYWYQFP  
LDPLWHKILGLVMILGIMGWCGNGVVVYVFIMTPSLRTPSNLLVVNLAFSDFIMMGFMC  
PPMVICCFYETWVLGSLMCDIYAMVGSGLCGCASIWTMTAIALDRYNVIVKGMSTPLTIK  
RAMLQILGIWLFGLIWTILPLVGNRYVPEGNMTACGTDYLSQDWTFKSYILVYSFFVYY  
TPLFTIISYYFIVSAVAHEKAMKEQAKKMNVTSLRSGDNQNTSAEAKLAKVALTTISLW  
FMAWTPYLVINYIGIFNRSLLITPLFTIWGSLFAKANAIYNPIVYGISHPKYRAALKEKLPFLV  
CGSTEDQTAATAGDKASEN-

>Amelopsin-LW1

MIAVSGPSYEAFFSYGGQARFNNQTVVDKVPDMLHLIDANWYQYPLNPMWHGILGFVI  
GMLGFVSVMGNGMVVYIFLSTKSLRTPSNLFINLAISDFLMMFCMSPPMVINCYYETWV  
LGPLFCQIYAMLGSLFGCSIWTMTMIAFDRYNVIVKGLSGKPLSINGALIRIIAIWLFSLG  
WTIAPMFGWNRVYVPEGNMTACGTDYFNRLLSASYLVCYGIWVYFVPLFLIISYWFIIQ  
AVAAHEKNMREQAKKMNVASLRSENQNTSAECKLAKVALMTISLWFMWTPYLVINFS  
GIFNLVKISPLFTIWGSLFAKANAVYNPIVYGISHPKYRAALFAKFPSLACAAEPSSDAVSTT  
SGTTTVDNEKSNA-

>Amelopsin-UV

MSNDSIHWEARYLPAGPPRLGWNVPAEELIHIPEHWLVYPEPNPSLHYLLALLYILFTFLA  
LLGNGLVIWIFCAAASLRTPSNMFVVNLAICDFFMMIKTPIFIYNSFNTGFALGNLGCQIFA  
VIGSLTGIGAAITNAIAIDRYSTIARPLDGKLSRGQVILFIVLIWTYTIPWALMPVMGVWG  
RFVPEGFLTSCSFYLDTDNEIRIFVATIFTFSYCIPMILIIYYYSQIVSHVNVNHEKALREQAK

KMNVDLSRSNANTSSQSAEIRIAKAAITICFLYVLSWTPYGVMSMIGAFGNKALLTPGVT  
MIPACTCKAVACLDPYVYAISHPKYRLELQKRLPWLELQEKPIDSTSTTTETVNTPPASS-  
>Ceraopsin-LW

MAITSMDPAPGVAAMQAWGGHAEAYSANQTVVDKVLPEMLHLIDAHWYQFPPMNPLW  
YGLLGFTICTLAFISVTGNGMVIYIFTTTSKSLKTPSNMLVVNLAFSDFLMMAMMAPPLCIN  
SYYQTWVFGPVACQFYACFGSLFGCVSIWTMTAIAFDRYNVIVKGIAAKPLTVNGALLQIF  
GVWAFSLAWTLAPIFGWSRYVPEGNMTACGTDYLSKDLLSQIYIITYSIACYFLPLALIVYS  
YFFIVQAVAAHEKAMREQAKKMNVASLRSEQANTSAECKLAKVALMTISLWFMWTPY  
LVINFAGVFETAPISPLSTIWGSVFAKANAVYNPIVYGISHPKYRAALYQRFPSLACQPSPSE  
ETGSVASAATACTEEKPSA-

>Ceraopsin-V2

MAHNHTVDHGPLAYPFBKMSAEIQEGMLGWNIPPEHQDLVHEHWRQFPAVDKSSHYLLA  
LIYATLTIFISITGNGLVIWIFGTSKSLRSASNMFIIINLAIFDLTMMLEMPHLIVNSFYQRMLGN  
RLGCDIYSVFGSLSGIGGAINAVIAYDRYKTISCPIDGRINRVQASILIAITWLYALPFTIVPM  
TGAWGRYVPEGFLTTCSEDFLSEDPDKTFVACIFVWSYVIPMSLICTFYSKLFIAVRHHEK  
MLKEQAKKMNVKSLASNKDDGGKSVEIRIAKVAFTIFFLFCISWTPYGIVAMIGAFGDRAL  
LTPVVTMIPAVFCKSVSCIDPWVYAINHPRFRVELEKRVPMGMVREPDPAQSTNASTATT  
PAEA-

>Ceraopsin-V1

MAENFTENEPIAFPYKMVSHEIQKMLGWNIPQEHQHLVHEHWRQFPDVRSSHYLLALI  
YTILTISVTGNGLVIWIFSTSKSLRTPSNMFVINLALFDLMMGEMPHLILNSFYQRMLGY  
ELGCDIYAVLGSLSGIGGAMTNAVIAIDRYKTISSPIDGRINRAQATLLVIFTWLYAMPFTVF  
PLTKTWGRFVTEGFLTTCSEDFLSDDVKTFLCISIWVYVIPMTLICTFYKLFSAVRHHER  
MLKEQAKKMNVKSLASNKEDAGKSVEIRIAKVAFTIFFLFCISWTPYGIVATIGAFGDRSLL  
TPVVTMIPAVFCKAVSCLDPWVYAINHPRFRVELEKRVPMGMVREPDPAQSSTGSAVTN  
SAEA-

>Ceraopsin-UV

MIPTQDMDNRTEYYNIYGAYFAPLRSGGERMLGEGLTGEDLAMIPHEHWFKYPEPPASAHT  
ALCLLYCFFTAALIGNGMVIFIFASTKSLRTASNLLILNLAIFDFIMMLKAPIFIYNSAMRG  
FAAGALWCKIFAVMGSYSGIGAAMTNACIAYDRHSTITRPLDGRLSRGKVLMIICIWIYTT  
PWSLMLPLFRVWGRFVPEGYLTSCTFDYLTNSFDNKLFGCIFTCSYVFPMLCIIYFYSIVK  
QVFAHEAALREQAKKMNVESLRSNQNAGAESAIEIRIAKAAALTVCFVSWTPYGVMSLI  
GAFGDQELLTPGVTMIPAITCKAVACIDPWVYAISHPKYRQELQRRMPWLQISEPDDNTSN  
TSNTTTNSAAPA-

>Ceraopsin-BL

MFNNVNDFSAEAGPVAYPFBKMSDEVQQNMLGWNVPSEYQDLVHDHWRNFAAIDKFW  
HYCLALIYMILWISSVCGNGIVVWIFSTSKSLRSASNMFIVNLALFDMVMMIEMPHLIINSF  
YQKMIGYQVGCIDIYATLGSISGIGAAISNAVIAYDRYKTISCPIDGRINKVQASILIAFTWFW  
TLPFTILPLLKVGKVFVPEGFLTTCSEDFYFTDDEDTKVFCIFVWSYCFPMALICIFYSKL  
FTAVRLHEKMLKEQAKKMNVKSLASNKEDAGKSVEIRIAKVAFTIFFLFCVCAWTPYAIVT  
MIGAFGDRSLLTPHVTMIPAVFAKSVSCIDPWVYAINHPRYRAELQKRLPWMGMVREPEPET  
QSSNASTTTQSQAEEA-

>Pglaoopsin1

MALDSLDPAAATFGHAWAGKMEAYGSNQTVIDQVLPPEMIHLIDPHWYQFPPMNPLWHGLL

GFVIAVLGFISLSGNGMVIYIFTTTLTKLTPSNLLVLNLAVSDFLMMTCMAPPLVVNSYHET  
WVFGPLACALYAAAGSLFGTISIWTMTMIAFDRYNVIVKGIAAKPMTNNGALLRILAIWV  
SSLAWTVAPMFGWNRYPVEGNMTACGTDYLNKDWFSRSYIVAYAIFCYFTPLALIISYFF  
IIQAVAAHERAMREQAKKMNVASLRSSSEAANTSAECKLAKVALMTISLWFMWTPYLVIN  
FTGIFETATISPLGTIWGSVFAKANAVYNPIVYGISHPKYRAALYQRFPSLACQPAADDNTS  
QASGKTTVCEEKPSA-

>Pglaopsin2

MAIANLDPGLGAAAEVWGGQAAAFSSNQTVDKVSFMMHLIDPHWYQFPPMNPMWH  
GLLGFTIGVLGFISITGNGMVVYIFTSTKSLKTPSNLLVNLAFSDFLMMMLCMAPPMVNC  
YYETWVFGPLACELYACAGSLFGSISIWMTMTMIAFDRYNVIVKGIAAKPMTINGALLRILGI  
WLFLSLAWTIAPIFGWNRYVPEGNMTACGTDYLNKSWLSRSYILVYSIFVYVYMPLLLIISY  
FFIVQAVAAHERAMREQAKKMNVASLRSSSEAANTSAECKLAKVALMTISLWFMWTPYL  
VINYTGVFETAISPLATIWGSVFAKANAVYNPIVYGISHPKYRAALYQKFPPLACQPSPEE  
TGSVASGATTACEEKPSA-

>Pglaopsin3

MALDYLNLTGAAKMGTWNGQMSAYGANQTVVDKVLPEMLHLIDPHWYQFPPMNPLWY  
GLLGFTIACLAITSITGNAMVIYIFTTTLKNLTPSNLLVNLAVSDFLMMACMAPPLIINSY  
NETWVFGPLFCAIYACGGSLYGTVSIWTMTAIAFDRYNVIVKGIAAKPMSINGALLRILAI  
WLSSLAWTVAPIFGWNRYPVEGNMTVCGTDYLSKDMLRSYIIAYAVFCYFLPLGLIISY  
WFIIQAVAAHEKAMREQAKKMNVASLRSSDAANTSAECKLAKVALMTISLWFMWTPYL  
VINFAGVFETAPISPVSTIWGSVFAKANAVYNPIVYGISHPKYRAALYQRFPSLACQPSDES  
GSVASGNTAVCEEKPPA-

>Pglaopsin4

HLIDPHWFQFPPMNPLWHGLLGFTIGVLGFISMVGNMVIYIFSATKNLTPSNLLVNLAV  
SDFLMMFTMSPAMVVNCYNETWVFGPFACELYGCAGSLFGCISIWMTMTMIAFDRYNVIV  
KGIAAEPMTKKGALLRILFVWAASLAWTLAPLFGWNRYPVEGNMTACGTDYLT KDWFSR  
SYILVYGGFFVYFAPLFLIISYFIVKAVAAHEKSMREQAKKMNVASLRSSSESANTNAECK  
LAKVALMTISLWFLAWTPYLIINFMGIFESMPISPLTTIWGSLFAKANAVYNPIVYGISHPRY  
RAALYKKFPLSLSCQAASDEVDSVASNVTAVSNEKPA-

>Pglaopsin5

MIAPAAMDNHTENNYNYGAYFAPYRSDEPVEMLGAGLTGADLAAIPEHWLAYPAPPASA  
HTMLALVYVFFTAALIGNGLVIFIFSASKSLRTPSNLLVVQLAILDFLMMMLKAPIFIYNSIK  
RGEAAGVIGCQIFAFMGSVSGTAAGLTNACIAYDRHSTITRPLDGRLSRGKVLMMVCVW  
VYTAPWAILPQLQIWGRYPVEGFLTSCFTDYLTTFDNKLFVASMFCVYVFPMLAIMYFY  
SGIVKQVFAHEAALREQAKKMNVDSLRSNQNASAEIRIAKAALTVCFLYVASWTPYG  
VMSLIGAFGDQNLTPGVTMIPALACKGVACIDPWVYAISHPKYRQELQKRMPLWQIDEP  
DDNVSNTTNTANSSAPA-

>Pglaopsin6

MAANYSDDIGPMAYPMKLVSSSEIVEHMMGWNIPPEHQAMVHAHWRSFPAVSKYYHFILA  
LIYTMMLVTSLIGNGIVIFSTSKSLRSASNMFVINLAVFDLMMMIEMPLLIANSFYQHPI  
GFQLGCDIYAVLGSISGIGGAINAVIAFDRYKTISCPLDGRINKVQASLLIVFTWFWSLPFTI  
LPALKVWGRFVPEGFLTCSFDYFTDDQDTKVVFACIFVWSYAIPMALICYFYSQLFGAVR  
LHEKMLQEQAQKMNVKSLASNKEDASKSVEIRIAKVAFTIFFMFVCGWTPYAIVTMTGAY  
GDRSLLSPVATMIPAVCKIVSCIDPWVYAINHPRYRAELQKRLPWLVGQDPDSVSTSN

SVTTTQSHTPNAET-

>Pxutopsin-UV

MIPAAVMDNHTENNYNYGAYFAPYRLEGVELLGAGLTGEDLAAIPEHWLSYPAPPASAHT  
MLALVYVFFTAAALIGNGLVIFIFSASKSLRTPSNLLVVQLAVLDFLMMLKAPIFIYNSIKRG  
FASGVIGCCQIFAFMGSVSGTAAGLTNACIAYDRHSTITRPLDGRLSRGKVLMMVCVWLY  
TAPWAILPQLQIWGRYVPEGFLTSCFDYLTTFDNKLFVASMFCVYIFPMIALLYFYSGIV  
KQVFAHEAALREQAKKMNVDSLRSNQNAAESAEIRIAKAALTVCFLYVASWTPYGVMS  
LIGAFGDQNLTPGVTMIPALACKGVACIDPWVYAI SHPKYRQELQKRMPWLQIDEPDDN  
ASNTTSNTANSSAPA-

>Pxutopsin-BL

MAANYSDDIGPMAYPMKLVSSEMVEHMMGWNPIEEHQAMVHAHWRSFPAVSKYYHFIL  
ALIYTMLMVTSLVGNIGIWIWIFSTSKSLRSASSMFVINLAVFDLMMMIEMPLLIANSFYQHP  
IGFQLGCDVYAVLGSISIGGAINAVIAFDKYTISCPLDGRINKVQASLLIAFTWFWSMPF  
TILPALKVWGRFVPEGFLTTCDFYFTDDQDTKVFVACIFVWSYAIPMALICYFYSQLFGAV  
RLHERMLQEQA KKMNVKSLASNKEDASKSVEIRIAKVAFTIFFMFVCGWTPYAFVTMTG  
AYGDRSLLTPVATMIPAVCKIVSCIDPWVYAINHPRYRAELQKRLPWLGVREQDPDTVSN  
SNSVTTTQSHTPTAEA-

>Pxutopsin-LW1

MAMDSLDPGAASAPAWAGKIEAYGSNHTVIDQVLPPEMLHLIDPHWYQFPPMNPLWHGLL  
GFVIAVLGFISLSGNGMVIYIFTTTLTKLTPSNLLVLNLAVSDFLMMTCMAPPLVVNSYHET  
WVFGPLACALYAAAGSLFGTISIWTMTMIAFDRYNVIVKGIAAKPMTNNGALLRILAIWV  
SSLAWTVAPMFGWNRYPVEGNMTACGTDYLNKDWFSRSYIVAYAIFCYFTPLALIISYFF  
IIQAVAAHEKAMREQAKKMNVASLRSSEAANTS AECKLAKVALMTISLWFMWTPYLVIN  
FTGIFETATISPLGTI WGSVFAKANAVYNPIVYGISHPKYRAALYQRFPSLACQPAADDNTS  
QVSGKTAVCEEKPSA-

>Pxutopsin-LW2

MAIANLEPGMGASEAWGGQAAAFGSNQT VVDKVT PDMMHLIDPHWYQFPPMNPMWH  
GLLGFTIGVLGFISITGNM VVYIFTSTKSLKTPSNLLVVNLAFSDFLMMMLCMAPPMLINC  
YYETWVFGPLACELYACAGSLFGSISIWMTMIAFDRYNVIVKGIAAKPMTINGALLRILGI  
WLFSLAWTIAPMLGWNRYVPEGNMTACGTDYLSKSWLSRSYILVYSIFVYYTPLLLIISY  
FFIVQAVAAHEKAMREQAKKMNVASLRSSEAANTS AECKLAKVALMTISLWFMWTPYL  
VINYTG VFETAPISPLATI WGSVFAKANAVYNPIVYGISHPKYRAALYQKFPSLACQPSAEE  
TGSVASGATTACEEKPSA-

>Pxutopsin-LW3

MALNYLNTGAAKMDTWNGQMSAYGANQTVVDKVLPEMLHLIDPHWYQFPPMNPLWY  
GLLGFTITCLAITSITGNAMVIYIFTTTLKNLTPSNLLVVNLAVSDFLMMACMAPPLIINSY  
NETWVFGPLFCAIYACGGSLYGT VSIWTMTAIAFDRYNVIVKGIAAKPMSINGALLRILAI  
WLSLAWTVAPIFGWNRYPVEGNMTVCGTDYLSKDWLSRSYIIAYAVFCYFLPLGLIVYSY  
WFIIQAVAAHEKAMREQAKKMNVASLRSSEAANTS AECKLAKVALMTISLWFMWTPYL  
VINFAGVFETAPISPVSTI WGSVFAKANAVYNPIVYGISHPKYRAALYQRFPSLACQPSDES  
GSVASGNTAVCEEKAPA-

>PxutopsinRh3

YLYFRCTRLRTPGNILVANLALSDFIMLAKTPIFIFNSFNLGPALGKTGCVIYGFLGGLTGTT  
SIATLTAIALDRYWAVVRPLEPLTALTAVRARLLAVGAWTYAAVFSAVPAFDGFGHYVPEG



YLTS CSFDYLTEDLRPRYFIFAFFCAAWLVPFCTIFFCYTSILQVVVCKRNMPSKNQEQRLS  
SRHVKEQTKRKA EIKLAFLVIVVIALFFISWTPYAIVALLGIFGKKNLITPTASMIPALFCKTA  
ACINPFYIITHPKFRKELQKIIYRDKSKRMSGTLRTTGYYTDS SRMHRPSKDLSDTDVEILE  
MKDIPFRTGLNRNTSYNLETISSRV SEREGSQRSASLKS FEDSVVSPPSWYSKPQFSK KRSF  
QRRSSQKSGQ-

>Pglaopsin-LW1

MALDSLDPAAATFGHAWAGKMEAYGSNQTVIDQVLP EMIHLIDPHWYQFPPMNPLWHGLL  
GFVIAVLGFISLSGNGMVIYIFTT KTKLTPSNLLVLNLAVSDFLMMTCMAPPLVVNSYHET  
WVFGPLACALYAAAGSLFGTISIWTMTMIAFD RY NVIVKGIAAKPMTNNGALLRILAIWV  
SSLAWTVAPMFGWNRYVPEGNMTACGTDYLNKDWFSRSYIVAYAIFCYFTPLALIISYFF  
IIQAVAAHERAMREQAKKMNVASLRSS EAANTS AECKLAKVALMTISLWFMWTPYLVIN  
FTGIFETATISPLGTIWGSVFAKANAVYNPIVYGISHPKYRAALYQRFP SLACQPAADDNTS  
QASGKTTVCEEKPSA-

>Pglaopsin-LW2

MTIASLDPGLGPAMLDVWNGQTA AFGSNQTVVDKVPDMLHLVDPHWYQFPPMNPMW  
HGLLGFTIGVLGFISIAGNM VVIYIFTT KSLKTPSNLLVNLAFSDFLMMCFMSPAMVVN  
CYYETWVFGPLGCDIYACTGSLFGSVSIWTMTMIAFD RY NVIVKGIAAKPLTINGALLRIL  
GIWLFSLLWTVAPIFGWNRYVPEGNMTACGTDYINKSWFSRSYILVYSVFVYYAPLLLIYS  
YFFIVQAVAAHERAMREQAKKMNVASLRSS EAANTS AECKLAKVALMTISLWFMWTPY  
LIINYM GIFETAPISPLTTIWGSVFAKANAVYNPIVYGISHPKYRAALYQKFPSLACQPSPEES  
GSVASGATTACEEKPSA-

>Pglaopsin-LW3

MTIERQEVGAMTMRAW DGAMAPYTSNQT VVDKVLPEMLHLIDAHWYQFPPMDPLWYS  
LLGCTIAVLCLISVTGNAMVIYIFTT KHLKTPSNLLVNLAVSDFLMMACMAPPLMINSY  
NQTWVFGPLFCAIYACGGSLYGT VSIWTMTAIAFD RY NVIVKGIAAKPMTINGALLRIFAV  
WLSSLAWTVAPILGWNRYVPEGNMTACGTDYLSKD LLSRSYIVAYAIFCYFLPLALIISY  
FIIQAVAAHERAMREQAKKMNVASLRSSDTANTSTECKLAKVALMTISLWFMWTPYLV I  
NFAGIFETAPISPLGTIWGSVFAKANAVYNPIVYGISHPKYRAALYQRFPALACRPSAEENG  
SVASANTAVCEEKPA A-

>Pglaopsin-Rh4

HLIDPHWFQFPPMNPLWHGLLGFTIGVLGFISMVGNMVIYIFSATKNL KTPSNLLVNL A  
FSDFLMMFTMSPAMVVN CYN ETWVFGPFACELYGCAGSLFGCISIWMTMTMIAFD RY NVIV  
KGIAAEPMTKKGALLRILFVWAASLAWTLAPLFGWNRYVPEGNMTACGTDYLT KDWFSR  
SYILVYGGFVYFAPLFLIISYFFIVKAVAAHEKSMREQAKKMNVASLRSS ESANTNAECK  
LAKVALMTISLWFLAWTPYLIINFMGIFESMPISPLTTIWGSLFAKANAVYNPIVYGISHPRY  
RAALYKKFPSLSCQAASDEVDSVASNVTAVSNEKPA A-

>Pglaopsin-BL

MAANYSDDIGPMGYPMKLVSS EIVEHMLGWNIP EEHQEMVHEHWRNYP AVNKYWHFCL  
GFIYSLLMILSLVGN GTVIWIFSTSKSLRSASNM FVINLALFDLTM MLEMPLIMNSFYQYP  
VGFQLGCDIYGIIGSLSGIGG AITNAVIAFD RY K TISCPLDGRINKVQAYLLILFTWIWAMPF  
TVLPVRVWGRYVPEGFLT TCSFDYFTDDQDTKVFVAAIFIWSYGIPMSLICFFYSQ LFGAV  
RLHEKMLQEQA KKMNVKSLASNKEDANKSVEIRIAKVAFTIFFMFVCSWTPYAFVALTGA  
YGDRNLLTPHATMIPAVCAKVVSCIDPWVYAINHPRYRAELEKRIPWLG VREQDPDTASER  
ASVATAQSHTPNAEA-

>Pglaoopsin-UV

MIPPAVMDNHTEINYNYGAYFAPYRSEGPVEMLGAGLTGEDLAAIPEHWLKYAAPVSAH  
TALALVYVFFFTGAALIGNGLVIFIFSTSKSLRTPSNLLVLQLAVLDFIMMLKAPIFIYNSANR  
GFATGVIGCKIFAFMGSISGIGAGMTNACIAYDRHSTITRPLDGRLSRGKVILMIVCVWMY  
TLPWAILPLLQIWGRYVPEGFLTSCSFDYLTDTFDNKLFGVGCIFVCSYVFPMTAILYLYSGIV  
KQVFAHEAALREQAKKMNVDSLRSNQNASAESAEVRIAKAALTVCFLYVCSWTPYGV  
SLIGAFGDSSLLTPAVTMIPALACKGVACIDPWVYAISHPKYRQELQKRMPLWQIDEPDDN  
VSNTTNTANSAAPA-

>Aipsopsin-UV

MYNQTENAYYDAHFAPFKSGGPSGVEMLGDGLTGDDLAMVPEHWLAFAPPASAHTAL  
ALLYIFFTAAALVGNGLVIFIFSTTKSLRTSSNLLILQLAILDFIMMAKAPIFIYNSAMRGFAS  
GTIGCQLFALMGAYSGIGAGMTNACIAYDRHSTITRPLDGRLSRGKVLLMIAFTWIYSTPW  
ALLPLFKIWGRYVPEGYLTSCFDYLTNTFDTKLFCVACIFTCVYVFPMSMIYFYSGIVKQV  
FAHEAALREQAKKMNVESLRSNQNANAESAERIARIAKAALTVCFLFVASWTPYGIMSLIGAF  
GDQQLLTPGVMTIPAVACKAVACIDPWVYAISHPKYRQELQRRMPWLQIQEPDDTVSTATS  
NTVSSAPAATPA-

>Aipsopsin-BL

MATNYTDNIGPMAYPLKMOVSEVVEHMLGWNIPPEHQDLVHEHWRNFPVSKYAHYML  
ALIYTMLMVTSTFLGNGIWIWIFGTSKSLRSPSNMFVINLAVFDLMMMLEMPLIMNSFYQR  
MVGYYQLGCDIYAVLGSLSGIGGAINAVIAFDRYKTISCPLDGRINRVQAFILIAFTWFWAL  
PFTVLPALKIWGRFVPEGFLTTCSDYFTDDQDTKVFVA AIFVWSYAIPMTLICIFYFQLFG  
AVRLHERMLSDQAKKMNVKSLTANKDDASRSVEIRIAKVAFTIFFLVCWTPYAIVTMT  
GAFGDRGLLTPVATMIPAVCCVWSCIDPWVYAINHPRYRAELQKRLPVMGVREADPDSV  
STTTSTVGTAQSTAPSAAEA-

>Aipsopsin-LW1

MSLTLDPGGIAALQAWGGQVAAYGASNQTVVDKVPDMLHMVDPYWYQFPPMNPLW  
HGLLGFTIGCLGFISITGNGMVIYIFMSTKSLKTSPSNLLVVNLAFSDFLMMCAMPAMVVN  
CYNETWVWGPLACELYACAGSLFGCASIWTMTMIAFDRYNVIVKGIAAKPMTNNGALLR  
ILGIWAFSLAWTLAPFFGWNRYVPEGNMTACGTDYLSKDWFSRSYILYVSFVYFLPLLLII  
YSYFFIVQAVAAHEKGMREQAKKMNVASLRSSEAAANTS AECKLAKVALMTISLWFWAWT  
PYLVINYTGVFESAPISPLATIWGSLFAKANAVYNPIVYGISHPKYRAALYQRFPSLSCQASP  
DESGSVASGATAVSEEKPA-

>Aipsopsin-LW2

MADTGPMAALQAWGGQAMHGTVNQTVVDKVPADMLHMVDPHWYQFPPMNPLWHA  
LLGFTIGVLGFSIAGNGMVIYIFSSTKSLKTSPSNLLVVNLAFSDFLMMCAMPAMVINCY  
NETWVFGPFACELYGCAGSLFGCASIWTMTMIAFDRYNVIVKGIAAKPMTKTGALQRILG  
IWLFLSLAWTLAPFFGWNRYVPEGNMTACGTDYLSKDWMSRSYILVYSFVYFLPLLLIYS  
YYFIVQAVTAHEKAMRDQAKKMNVASLRSSEAAANTS AECKLAKVALMTISLWFWAWTP  
YLVINYTGVFESAPISPLATIWGSLFAKANAVYNPIVYGISHPRYRAVLYQKFPALACTVSPD  
EGGSVATGATVVADEKSEKQQA-

>Atraopsin-UV

MSKTIQLIFILLSVMQCYNLNDNSNESDVSVNENSVAKSFHTIQTVILKRLKCHQDILWGRS  
GNLKLWKKRRRTIQPVKLLSERVKREKPNYKIRRGVSEPRTIHLVHMNSGLAVSDVAPL  
SLVARFKKQWPERLWREKGLYTNDYLVLINSHWLHFPPDPVSNYVLGSLYIVMMAVGC

GNAYVLFMYLRCRSLRTPGNILVANLALSDFMMLAKTPIFIFNSFHFGPALGKTGCVIYGF  
VGGLTGTTSIATLSAIALDRYWAVVRPLEAVGAITRILAVVAWLYAAIFASVPAFDIGY  
GRYVPEGYLTSCSFDYLTEESRPRIFVFFCAAWVAPFCTIFFCYLSIFRTVVCNRNITTKNQ  
EQRLSSRHVKERAKRKAIEIKLAALVMAVIALFFISWTPYAVVALLGIFGRKDLITPLSSMIPA  
LFCKTAACINPFYIITHPNFRKEFKKLLYRDKSRRMGGTMKTIGYYTESTKMHRPSKDLS  
DTDVEIEMTDIPYQTDQLLERRGPKVKTISSRVIDREGSQKSISMKSFEEDVVSPPSWYSK  
PKFAKKKSFQTRSLKSIVSLNTDPTI-

>Atraopsin-LW1

MDEEDLINIDTSEYEFPNILWHVKPAQEIAIKTTAMLAIGFTGIFMNSIIIIIVIRNKWLWSAS  
NYLVGNLALVDLITLIFCPWFMLVRDFYQQYVLKTFGCQFEGFLQATLLLAGVAVMLVS  
YDRLAAAALSADARVTRNVAPKAIFCTWFIAIVLSLPWILRREYTERQWLDYLETFCVED  
VEVLGIYWHFTLTLVWIPLGLMVVITYGTIMWRLECSARELSTRGSGHAVTKARSRALRI  
TACVLMTAVVCRLPYTVLIYWRNNLSNDINSVEGSYDSMWFAANYLMYLNCVAVNPLIYG  
FTNTRLRKAMDRTPGVACFKFGTWCCVCTMLHRKQVVVTDKHTEKIFVIESTRPNKCLT  
HVIKNILHINKETVDFSIKNDEITMKPTRVTPV-

>Atraopsin-LW2

MDEEDLINIDTSEYEFPNILWHVKPAQEIAIKTTAMLAIGFTGIFMNSIIIIIVIRNKWLWSAS  
NYLVGNLALVDLITLIFCPWFMLVRDFYQQYVLKTFGCQFEGFLQATLLLAGVAVMLVS  
YDRLAAAALSADARVTRNVAPKAIFCTWFIAIVLSLPWILRREYTWLDYLETFCVEDVEV  
LGIYWHFTLTLVWIPLGLMVVITYGTIMWRLECSARELSTRGSGHAVTKARSRALRITAC  
VLMTAVVCRLPYTVLIYWRNNLSNDINSVEGSYDSMWFAANYLMYLNCVAVNPLIYGFTN  
TRLRKAMDRTPGVACFKFGTWCCVCTMLHRKQVVVTDKHTEKIFVIESTRPNKCLTHVI  
KNILHINKETVDFSIKNDEITMKPTRVTPV-

>Csupopsin-UV

MENRTDGYYYGAHFAPLRSGAASSVEMLGEGLTGDDLAMIPHEHWLVYPTPPASAHTALA  
LLYVFLTAAALVGNGLVIFIFSTTKSLRTSSNLLILQLAILDFVMMAKAPIFIYNSAMKGFAT  
GTLGCKIFALMGAYSGIGAGMTNACIAYDRHSTITRPLDGRLSRGKALLMMSFVWIYATP  
WALLPLFETWGRYVPEGYLTSCFDYLTNTFDTKLFGVGCIFFCYSYVIPMSFIIYFYSIGVQKQ  
FAHEAALREQAKKMNVESLRSNQTAGQQSAEIRIAKAALTVCFVSWTPYGIMSLIGAF  
GNQELLTPGVMTIPAITCKAVACIDPWVYAISHPKYRQELQRRMPWLQIDEPDDTASTTTT  
NTVNAPPAASA-

>Csupopsin-BL

MAENYTNFGIGPVAYPLKMVSQEVVEHMLGWNPIPEEHQDLVHEHWRNFPVASKYWHYC  
LALIYTMMLMVTSLTGNGIWIWIFGTSKSLRSASNMFVINLAVFDVMMMLEMPLLMNSFH  
QRMLGYQLGCDIYAILGSLSGIGGAINAVIAFDRYKTISCPLDGRINKIQAALLIAFTWFW  
ALPFTILPAAKIWGKFVPEGFLTTCSDYFTDDQDTKVFAVACIFVWSYCIPMALICYFYSQL  
FGAVRLHERMLQEQAQKMNKSLASNKEDASRSVEIRIAKVAFTIFFLVCGWTPYAFVA  
MTGAFGDRSMLTPVATMIPAVCCKIVSCIDPWVYAINHPRYRAELQKRIPWLGVREADPDT  
ASTTTSVATNQTSSQADA-

>Csupopsin-LW

MAFASLDPGPGVAALQAWGGQVAAYGASNQTVVDKVPPELLHMVDPYWYQFPPMNPL  
WHGLLGFTIGVLGFISISGNGMVIYIFTSTKSLKTPSNLLVVNLAFSDFMCMSPAMVIN  
CYNETWVFGALACEYACAGSLFGCASIWTMTMIAFDRYNVIVKGIKAAKPMTNNGALLRI  
LGIWFLSLAWTLAPFFGWNRYPVEGNMTACGTDYLSKDWFSRSYILVYSVFVYFMPLLLII

YSYFFIVQAVAAHEKGMREQAKKMNVASLRSSAANTSAECKLAKVALMTISLWFWMAWT  
PYLVINYTGVFESAPISPLATIWGSLFAKANAVYNPIVYGISHPKYRAELYKKFPSLSCQASP  
DESGSVASGTTAVSEEKPA-

>Heraopsin-UV1

MENETQNYNVYGAFAPLRSSDGVKMLVDGLSDVLDLAVIPEHWLSYTSPPASAHTALALL  
YSFFTAAALIGNGLVIFIFATSRSLRTSSNLLILNLAIFDFIMMAKAPIFIYNSAMRGFATGAL  
GCQIFSVMGSSYGIGASMTNACIAYDRHSTITRPLDGRLSRGKALLMIACVWIYATPWALM  
PLFNWGRFVPEGYLTSCTFDYLSNTFDTKLFGCIFTCSYLFPMCFIIFYSYGVKQVFAH  
EAALREQAKKMNVESLRSNQNASAESAEIRIAKAALTVCFVSWTPYGVMSLIGAFGD  
QQLLTPGVTMIPAVACKTVACIDPWVYAISHPKYRQELQRRMPWLQIREPDDNASTGTNN  
TTNSTAPAASA-

>Heraopsin-UV2

MXNETQNSNVYGAYFAPLRSGDGVKMLVDGLSSAELEFIPEHWLTYPAPPASAHTALALM  
YCFFTAALIGNGLVIYIFATTKSLRTSSNLLILNLAIFDFIMMAKAPIFIYNSAMRGFAIGSL  
GCQIFALVGSYGIGAAMTNLCIAYDRHSTITRPLDGRLSRGKALLIAFVWIYTTPWSLLP  
LFRIWGRFVPEGYLTAACSFYLTNTFDTKLFTGCIFITYAIPLILIMYYYSGIVKQVFAHEA  
ALREQAKKMNVESLRSNQNASAESAEIRIAKAALTVCFVSWTPYGVMSLIGAFGDQQL  
LLSPGVTMIPAIACKGVACIDPWVYAISHPKYRQELQRRMPWLQIREPDDNVSTGTNNTTN  
SAAPAATA-

>Heraopsin-BL

MATNYTDDIGPMAYPLKMVSQEVVEHMLGWNIPPEHQGLVHEHWRNFPSVSKYAHFVL  
ALIYTCLILASLSGNGIWIWIFSTSKSLRSASNMFVINLAVFDMMMMLEMPLLVNSFYQR  
LVGYQLGCDIYGVLSLSGIGGAINAVIAYDRYKTISSPLDGRLNRVQASLLILFTWLWAL  
PFTILPAFRIWGRFVPEGFLTTCSEYFTEDQDTKVFVCMIFTWSYCIPMLLXCIFYSKLFG  
AVRLHERMLKEQAKKMNVKSLAANKEDAGKSVEIRIAKVAFTIFFLVCSWTPYAFVTMT  
GAFGDRSILTPVATMIPAVCAKIVSCIDPWVYAINHPRYRAELQKRLPWMGVREADPDSVS  
TSSGATAQTQNPTAEA-

>Heraopsin-LW

MAITSLDPGPGAAALQAWGGQMAAFGSBETVVDKVLDPDMLHLIDPHWHQFPPMNPLWH  
GLLGFVIGVLGFISVTGNGMVVYIFTTTLTKTPSNILVVNLAFSDFLMMFMAPPVINC  
YNETWVFGPLACQLYACAGSLYGCVSIWMTMIAFDRYNVIVKGIAAKPMTINGALLRVF  
GIWAFSLAWTIAPLFGWGRYVPEGNMTACGTDYFDQSFSNRSYILLYSIACYAPFLIIS  
YFFIVQAVAAHEKAMREQAKKMNVASLRSSDAANTSAECKLAKVALMTISLWFWMAWTPY  
LVINYAGIFKTMTISPIVTIWGSVFAKANAVYNPIVYGISHPKYRAALYARFPGLACQSAPE  
DNGSVASAATATEEKPSA-

>Lrubopsin-UV

MIPSLMDTKNESYHLYGAYFAPLRSSDEPEMLVDGLTGEDLEAVPEHWLSYTAPPASAHT  
ALALLYIFFTAAALIGNGLVIFIFATTKSLRTSSNLLILQLAILDFIMMAKAPLFIYNSAMRGF  
ATGVLGCQIFALMGSSYGIGAGMTNACIAYDRHSTITRPLDGRLSRGKVILMIACIWIYATP  
WSLLPLFKVWGRYVPEGYLTSCTFDYLTDTFDTKLFCIFVCSYVFPMSMIIFYSYGVK  
QVFAHEAALREQAKKMNVDSLRSNQNAAAESAEIRIAKAALTVCFVSWTPYGVMAL  
IGAFGDQRLLTGVTMIPAVACKAVACIDPWVYAISHPKYRQELQRRMPWLQINEPSDTAS  
TGTTNTNSTAPAASA-

>Lrubopsin-BL1

MEGNFTDNIGPLAYPFQMVSKEEHLVGLWNYPEEYQFMVQDHWRSYPAISKYWHYGL  
AFIYTMLFLASVTGNGIWIWIFSTSKALRSPSNMFVINLAVFDVMMMLEMPIFILNSFHHR  
VGYQTVCDIYATLGSISGFGGAIITNAVIAYDRYKTISCPLDGRVTKTQALLLIFTWVWALP  
FTILPAFKLWSKFVPEGFLTTCSFDYLTEDSDTKVFMSCCVWSYFIPVILCYYYFQLFGA  
VRTHEKMLREQAKKMNVKSLASNKEDGGKSVEIRIAKVAFTIFFLFCAWTPYAFVTLVGA  
FGDRSILSPVATMVPVAVCAKTVSCIDPWVYAINHPRYRAELTKRLPWLGVRESDPDTASSSS  
TATSQTQHHTAEA-

>Lrubopsin-BL2

MAYNFTDDDFGPVAHPLKMSSEAEHMLGWNIPPEEYQYFVHEHWRNFPVASKYWHYGL  
AFIYTLMLCASCLGNGIWIWIFSTSKSLRSPSNMFVINLALFDLMMFEMPLLIVNSFYQK  
MLGYQLSCDIYASFGAMSGIGGAMTNAIIAFDRYKTISCPLDGRITKVQALILIAFSWVWSI  
PFTFLPAFKVWGRFIPEGFLTTCSFDYLTDDPDTKLFVCMCFCWSYMIPMIFLCFFYSKLFSA  
VRMHEKMLREQAKKMNVKSLASNKDDAGKSVEIRIAKVAFTIFFLFCVSWTPYAFVTMT  
GAFGDRNILTPVATMVPVAVCAKIVSCIDPWVYAINHPRYRAELEKRVSWLGVKEXNPDTVS  
TSSTATSQAPADA-

>Lrubopsin-LW

MSITSLDPAGVAAMQAWGPQAMAYGGNETVIDKVLPEMLHKIDAHWYQFPPMNPLWH  
GLLAFVISIICIIATTGNGMVIYIFSTTKSLKTPSNLLVNLALSDFLIITMSPVVVNTYYET  
WIFGPLACDIYACCGSLFGCVSIWTMTMIAFDRYNVIVKGIAAKPLTINGALLRILGIWLF  
LAWTITPLFGWGKYAPEGNMVCVGTDYLDKSWVHRSYIILYSVACYFAPLLLIYSYWFIIQ  
AVSAHEKAMREQAKKMNVASLRSSDAANTSAECKLAKVALMTISLWFMWTPYLIINWA  
GIFKTSLSPLVTIWGSIFAKANSIYNPIVYGISHPKYRAALYARFPSLACQPSPDESGSVAST  
GTAVQEEKPSA-

>Msteopsin-UV

MANQSDNLYYGAAHFEALKSAGPVEMLGDGLTGEDLAAVPEHWLSYPAPPASAHTALALL  
YTFFTFEALIGNGLVIFVFTTAKSLRTSSNFLILQLAILDFIMMAKAPIFIYNSAMRGFATGAV  
GCQVFALMGSSYGIGASMTNACIAYDRHSTITRPLDGRLSKGVLMIALVWIYATPWSLL  
PLFKIWGRYVPEGYLTSCTFDYLTNTFDTKLFVACIFTCSYVFPMTMIIFYSGIVKQVFAH  
EAALREQAKKMNVESLRANQGGASQSAEIRIAKAALTVCFVSWTPYGVMLIGAFG  
NQELLTPGVMTMIPAVACKAVACIDPWVYAI SHPKYRQELQRRMPWLQIDEPDDSASTATSN  
TTNSGPAATA-

>Msteopsin-BL

MATNFTQELYEIGPMAYPLKMISNEVAENMLGWNIPPEEHQDLVHEHWRNFPVASKYWHY  
CLALIHTILVITSLTNGIWIWIFGTSKSLRSASNMFVINLAVFDLMMMLEMPMLVNSFYQ  
RLVGYQLGCDIYGVFGSLSGIGGAIITNAVIADRYKTISSPLDGRINTVQASLLIAFTWFWA  
LPFTILPATRIWGRFVPEGFLTTCSFDYFTDDQDTKVFVACIFVWSYCIPMSLICIFYSQLFG  
AVRLHERMLQEQAQKMNVKSLASNKEDASRSVEIRIAKVAFTIFFLFCVSWTPYAFVAMT  
GAFGDRGLLTPVATMVPVAVCCVSCIDPWVYAINHPRYRAELQKRLPVMGVREQDPDS  
VSNTTTSVATTQSAPTEA-

>Msteopsin-LW

MTISMDPGPLAAMQAWGGQVAAYGASNQTVVDKVTDPDMMHLIDPHWYQFPPMNPLW  
HALLGFTIGVLGFISICGNGMVVYIFMSTKSLKTPSNLLVNLAFSDFLMMCAMSPAMVV  
NCYYETWVWGPFACELYACAGSLFGCGSIWTMTMIAFDRYNVIVKGIAAKPMTNNGALL  
RILGIWLFSLAWTVAPMFGWNRVYVPEGNMTACGTDYLSKEWLSRSYILVYSVFVYFLPLF

LIISYFYIVQAVAAHERAMREQAKKMNVASLRSSEAANTSAECKLAKVALMTISLWFM  
WTPYLVINYTGVSAPISPLVTIWGSLFAKANAVYNPIVYGISHPKYQAALYARFPALQCA  
PSRDDSASTASATTAVSDEKPSA-

>Mbraopsin-UV

MYNQTESSYYDAHFAPFKSGGPGSGVEMLGEGLTGDDLAAPPEHWLAFPAPPASAHTALA  
LLYIFFTAAALVGNGLVIFIFSTTKSLRTSSNLLILQLAILDFIMMAKAPIFIYNSAMRGFATG  
TFGCQFALMGAYSGIGAGMTNACIAYDRHSTITRPLDGRLSKGKVLLMIAFVWIYSTPW  
ALLPLFKIWGRYVPEGYLTSCSFDYLTNTFDTKLTVACIFACSYVFPMSMIYFYSGIVKQV  
FAHEAALREQAKKMNVESLRANQNASAESAERIKAALTVCFVSWTPYGVMLIGA  
FGDQQLTPGVTMIPAVACKAVACIDPWVYVAISHPKYRQELQRRMPWLQIQEPDDTTSTAT  
GNTVSSAPAAAPA-

>Mbraopsin-BL

MATNYTNDIGPMAYPLKMSKEVVEHMLGWNIPPEHQDLVHEHWRNFPVANKYWHYC  
LALIYTMLMVTSLGNGIVIFGTGSKSLRSPSNMFVINLAVFDLMMMIEMPLLIMNSFYQ  
RMIGYQLGCDIYAVLGSLSGIGAITNAVIAFDRYKTISCPLDGRINKVQAFILIAFTWFWAL  
PFTILPALKIWGRFVPEGFLTCSFDYFTDDQDTKVFVACIFVWSYAIPMALICYFYSQLFSA  
VRLHERMLSDQAKKMNVKSLAANKEDASRSVEIRIAKVAFTIFFLVCAWTPYAFVTMTG  
AFGDRNLLTPVATMIPAVCCVVCIDPWVYAINHPRYRAELQKRLPVMGVREQDPDSVS  
TTTSVATAQSTAQPAAEA-

>Mbraopsin-LW

MSLTLDPGPIAALQAWGGQVAAYGASNQTVVDKVPDMLHMVDPHWYQFPPMNPLW  
HGLLGFTIGCLGFISITGNGMVIYIFMSTKSLKTPSNLLVNLAFSDFLMMCAMPAMVVN  
CYNETWVWGPLACELYACAGSLFGCASIWTMTMIAFDRYNVIVKGIAAKPMTNNGALLR  
ILGIWFLSLAWTLAPFFGWNRYVPEGNMTACGTDYLSKDWFSRSYILIYSVFVYFLPLLLII  
YSYFFIVQAVAAHEKGMREQAKKMNVASLRSSEAANTSAECKLAKVALMTISLWFM  
AWTPYLVINYTGVSAPISPLATIWGSLFAKANAVYNPIVYGISHPKYRAALYQKFPSLSCQASP  
DESGSVASGATAVSEEKPA-

>Msexopsin1

MDPGPGLAALQAWAAKSPAYGAANQTVVDKVPDMMHMIDPHWYQFPPMNPLWHALL  
GFTIGVLGFVSGNGMVIYIFMSTKSLKTPSNLLVNLAFSDFLMMCAMPAMVVNCYY  
ETWVWGPFACELYACAGSLFGCASIWTMTMIAFDRYNVIVKGIAAKPMTSNGALLRILGI  
WVFLSLAWTLAPFFGWNRYVPEGNMTACGTDYLSKSWVSRYSYILIYSVFVYFLPLLLIISY  
FFIVQAVAAHEKAMREQAKKMNVASLRSSEAANTSAECKLAKVALMTISLWFM  
AWTPYLVINYTGVSAPISPLATIWGSLFAKANAVYNPIVYGISHPKYQAALYAKFPSLQCQ  
SAPEDAGSVASGTTAVSEEKPA-

>Msexopsin2

MNNQSENYYHGAQFEALKSAGAIEMLDGGLTGDDLAAPPEHWLSYPAPPASAHTALALL  
YIFFTFAALVGNMVIYIFSTTKSLRTSSNLFVNLAILDFIMMAKAPIFIYNSAMRGFAVGT  
VGCQIFALMGAYSGIGAGMTNACIAYDRHSTITRPLDGRLSEGKVLLMVAFVWIYSTPWA  
LLPLLKIWGRYVPEGYLTSCSFDYLTNTFDTKLTVACIFVWSYAIPMALICYFYSQLFSA  
HEAALREQAKKMNVESLRANQGGSSESAERIKAALTVCFVSWTPYGVMLIGA  
FGNQQLTPGVTMIPAVACKAVACISPWVYAIRHPMYRQELQRRMPWLQIDEPDDTVSTATSN  
TTNSAPPAATA-

>Msexopsin3

MATNFTQELYEIGPMAYPLKMISKDVAEHMLGWNIPPEEHQDLVHDHWRNFPVASKYWHY  
VLALIYTMLMVTSLTGNNGIWIWIFSTSKSLRSASNMFVINLAVFDLMMMLEMPLIMNSFY  
QRLVGYQLGCDVYAVLGLSLSGIGGAINAVIAFDRYKTISSPLDGRINTVQAGLLIAFTWF  
WALPFTILPAFRIWGRFVPEGFLTTCSEFDYFTEDQDTEVVFACIFVWSYCIPMALICYFYSQL  
FGAVRLHERMLQEQAQQKMNVKSLASNKEDNSRSVEIRIAKVAFTIFFLCAWTPYAFVMT  
TGAFGDRTLLTPIATMIPAVCCCKVVSICDPWVYAINHPRYRAELQKRLPVMGVREQDPDA  
VSTTTSVATAGFQPPAAEA-

>Picaopsin-UV

MIPPIDMDKNETYHLYGAYFAPLRSSDAIEMLGEGLTGEDLAQVPEHWLSYPAPPASAHTA  
LALLYTFFTAALIGNGLVIFIFATTKSLRTSSNLLILQLAILDFIMMAKAPIFIYNSIMRGFAT  
GAMGCKIFGLMGSYSYGAGMTNACIAYDRHSTITRPLDGRLSQGKAILMVAFIWIYATPW  
SLMPLFEVWGRYVPEGYLTSCFTDYLSNTFDTKLFGCIFLCSYVFPMTMIIYFYSGIVRQ  
VFAHEAALREQAKKMNVDLSRNSQNAESAERIAKAALTVCFVSWTPYGVMAI  
GAFGDQNLTPGVMTMIPAVTCKAVACIDPWVYAIHPKYRQELQRRMPWLQINEPSDSAST  
GTTATANSAAPASA-

>Picaopsin-BL1

MAFNLTDDFGPVAALKMVSDEAEHMLGWNVPEEYQYFVHDHWRAYPAVSKWWHYGL  
AFIYTILMFCSCNGIWIWIFSTSKSLRSPSNFFVINLAIFDTLMMFEMPMLIVNSFYQTML  
GYQLSCDIYAAFAMSGIGGAMQNAIAFDRYKTISSPLDGRITNVQAMILIVFTWIWTLPF  
TFLPFFRVWGRFIPEGFLTTCSEFDYLTEDTDTKVFVCMIFLWSYVTPMTFLCFFYSKLFNAV  
RAHERMLREQAKKMNVKSLASNKDEAGTSVEIRIAKVAFTIFFLVCWTPYAFVMTGA  
FGDKGILTPVATMVPAAKIVSCIDPWVYAINHPRYRAELEKRVSWLGVKEPSPDTSQSS  
TATSQVPQEA-

>Picaopsin-BL2

MDNSTGNIGPMAYAFQMVEEETKEHILGYNYPEEYQFMVQDHWRSYPAINKYWHYSLA  
LIYTMLFIASITGNNGIWIWIFSTSKALRSPSNMFVINLAVFDVMMMLEMPIFVLNSYHHHIG  
YQAVCNVYATLGSISGFGGAINAVIAYDRYKTISSPLDGRVTKSQALALIVMTWVWVSLPF  
TILPAIQVWGKVFPEGFLTTCSEFDYLTEDYATRMFVLVCCIWNVYFLPVFILCYYYALLFGAV  
RTHEKMLREQAKKMNVKSLSNKDDGGASVEIRIAKVAFTIFFMFVCAWTPYAFVTLVGAF  
GDRSILTPVATMVPVCAKTVSCIDPWVYAINHPKYRAELTKRLPWLGVREKDPDTASSSS  
TATSQTHHPTAEA-

>Picaopsin-LW

MTIMNLD PAPGVAALQSWGPRASALFNNETGVDKVLSEMLHRIDPHWDQFPPMNPLWH  
AILAFITSVILIIASTGNMGVIYIFTTKTKLTPSNLFINLALSDFLIITMSPVNVNTYYET  
WIFGPLACDIYACCGSLFGCVSIWSMTMIAFDRYNVIVKGIKPLTNGGALLRILGIWLF  
LAWTITPLFGWGKYAPEGNMVCVCGTDYLDKSWVHRSYIILYSFAYYFMPLFLIISYWFIIQ  
AVSAHEKAMREQAKKMNVASLRSSDQANTSAECKLAKVALMTISLWFMWTPYLIINFA  
GIFKTERISPLATIWGSVFAKANAIYNPIVYDISHPKYRAALYARFPALACQPSADESGSVAS  
SGTAVQEEKPSA-

>Sexiopsin-UV

MYNQ TENSVDYDAHFAPFKSGSPSEVEMLGAGLTGDDLAAPPEHWLSFPAPPASAHTALAL  
LYTFFTAALGNGLVIFIFSTTKSLRTSSNLLILQLAILDFIMMAKAPIFIYNSAMRGFATGT  
VGCQIFALMGAYSIGAGMTNACIAYDRHSTITRPLDGRLSRGKVLLMMAFVWIYSTPWA  
LLPLFKIWGRYVPEGYLTSCFTDYLTNTFDTKLFGVACIFLCSYVFPMSMIIYFYSGIVKQVFA

HEAALREQAKKMNVESLRANQSSGAESAEIRIAKAALTVCFLFVASWTPYGVMALIGA  
FGDQQLTPGVTMIPAVACKAVACIDPWVYAISHPKYRQELQRRMPWLQIQEPDDTVSTATSN  
TNAPPAAPA-

>Sexiopsin-LW

MSLTLDPGPGIAALQAWGGQVAAYGASNQTVVDKVLDPDMLHMVDPHWYQFPPMNPLW  
HGLLGFTIGVLGFISITGNGMVIYIFMSTKSLKTPSNLLVNLAFSDFLMMCCMSPAMVVN  
CYNETWVWGPLACELYACAGSLFGCASIWTMTMIAFDRYNVIVKGIAAKPMTNNGALLR  
ILGIWAFSLAWTLAPFFGWNRYVPEGNMTACGTDYLSKDWFSRSYILIYSVFVYFMPLLLI  
YSYFFIVQAVAAHEKGMREQAKKMNVASLRSEAANTSAECKLAKVALMTISLWFWMAWT  
PYLVINYAGVFESATISPLATIWGSLFAKANAVYNPIVYGISHPKYRAALYQKFPSLSCQASP  
DESGSVASGATAVSEEKPA-

>Sexiopsin-BL

MATNFTDDIGPMAYPLKMVSKEVVEHMLGWNIPPEEHQDLVHDHWRNFPVANKYWHYV  
LALIYTMLMVTSLGNGIVIWIFGTSKSLRSPSNMFVINLAVFDLMMMLEMPLLIINSFYQR  
LIGYQLGCDIYAVLGSLSGIGGAINAVIAFDRYKTISCPLDGRINKVQAAILIAFTWFWAMP  
FTILPALKIWGRFVPEGFLTTCSFDYFTDDQDTKVFVGCIFVWSYAIPMALICYFYSQLFGA  
VRLHERMLSDQAKKMNVKSLAANKEDASRSVEIRIAKVAFTIFFLFCAWTPYAFVTMTG  
AFGDRSLLTPIATMVPVAVCCKVVSCIDPWVYAINHPRYRAELQKRLPWMGVREQDPDSVS  
TSTSVGTAQSTAQPTAEA-

>Slitopsin-UV

MYNQ TENSYYDAHFAPFKSGGPSDVEMLGAGLTGEDLA AVPEHWLSFPAPPASAHTALA  
LLYTFFTA ALLGNGLVIFIFSTTKSLRTSSNLLILQLAILDFIMMAKAPIFIYNSAMRGFASG  
TVGCQIFALMGAYSGIGAGMTNACIAYDRHSTITRPLDGRLSRGKALLMMAFVWIYSTPW  
ALLPLFKIWGRYVPEGYLTSCTFDYLTNTFDTKLFVACIFTCSYVFPMSMIIFYSGIVKQV  
FAHEAALREQAKKMNVESLRANQSSGAESAEIRIAKAALTVCFLFVASWTPYGVMALIGA  
FGDQQLTPGVTMIPAVACKAVACIDPWVYAISHPKYRQELQRRMPWLQIQEPDDTVSTAT  
SNTVSNAPPAAPA-

>Slitopsin-BL

MATNFTDDIGPMAYPLKMVSKEVVEHMLGWNIPPEEHQDLVHDHWRNFPVASKYWHYVL  
ALIYTMLMVTSLGNGIVIWIFGTSKSLRSPSNMFVINLAVFDLMMMLEMPLLIINSFYQR  
LVGYQLGCDIYAVLGSLSGIGGAINAVIAFDRYKTISCPLDGRINKVQAAILIAFTWFWAM  
PFTVLPALKIWGRFVPEGFLTTCSFDYFTDDQDTKVFVGCIFVWSYAIPMALICYFYSQLFG  
AVRLHERMLSEQAKKMNVKSLAANKEDASRSVEIRIAKVAFTIFFLFCAWTPYAFVTMT  
GAFGDRSLLTPIATMVPVAVCCKVVSCIDPWVYAINHPRYRAELQKRLPWMGVREQDPDSV  
STTTSVATAQSTAQPTAEA-

>Slitopsin-LW1

MSLTLDPGPGIAALQAWGGQVAAYGASNQTVVDKVPDMLHMVDPHWYQFPPMNPLW  
HGLLGFTIGVLGFISITGNGMVIYIFMSTKSLKTPSNLLVNLAFSDFLMMCCMSPAMVVN  
CYNETWVWGPLACELYACAGSLFGCASIWTMTMIAFDRYNVIVKGIAAKPMTNNGALLR  
ILGIWAFSLAWTLAPFFGWNRYVPEGNMTACGTDYLSKDWFSRSYILIYSVFVYFLPLLLII  
YSYFFIVQAVAAHEKGMREQAKKMNVASLRSEAANTSAECKLAKVALMTISLWFWMAWT  
PYLVINYTG VFESAPISPLATIWGSLFAKANAVYNPIVYGISHPKYRAALYQKFPSLSCQASP  
DESGSVASGATAVSEEKPA-



## 2.CSPs

>BmorCSP1

MKVLIVLSCVLVAVLADDKYTDKYDKINLQEILENKRLLESYMDCVLGKGKCTPEGKELK  
DHLQEALTEGCEKCTEAQEKGAETSIDYLIKNELEIWKELTAHFDPDGKWRKKYEDRAK  
AKGIVIFE-

>BmorCSP2

MKLLLVFLGLFLAVLAQDKYEPIDDSFDASEVLSNERLLKSYTKCLLNQGPCTAELKKIKD  
KIPEALETHCAKCTDKQKQMAKQLAQGIKKTHPELWDEFITFYDPQGKYQTSFKDFLES-

>BmorCSP3

MKSLIVLSCLLAACLAADLSKYENFDVEPIVTSRLLKAYINCFLDKGRCTPEASDFKKAL  
PDTIATNCGKCTEKQKANVRKVIKVIQKQKSTEWELVKKHDPGKHRADFDKFLGGS-

>BmorCSP4

MFMLFIISFIIVPVLKCCGTETSTYTTQYDEVDIKEIMGNERLLVAYIGCLLDKNPCTPEGKE  
LKRNPDALQSDCSKCSKQRENADAWIEFMIDNRPEDWTKLEERYNPDGSYRTKYLEGK  
HNATSNVDESK-

>BmorCSP5

MKFLVTAVLLSLAIAIQAGSYSDRYDNINVAEILGNKRLLTAYIKCVLEEGKCTAEGKELK-

>BmorCSP6

MKCLTIAALLFVAGLSIAEKYTDKYDNIDVDEILENRKLLVPYIKCVLDEGRCTPDGKELK  
AHIKDGMQTACAKCTDKQKVSARKIVKHIKQHEADYWEQMKAKYDPKDEFKEIYEGFL  
AGQN-

>BmorCSP7

MKSVILICFLGVATVVIARPKTPFDNINIEEIFENRRLLLGYINCILERGNCTRAGKDLKSSL  
KNVLEENCCKCEDQRKSIKVINYLVSSEPESWNQLKSKYDPEGKYLIKYEAKMESN-

>BmorCSP8

MNSLIAFCLFAVLAVALARPDDKYTDRYDNVNLDEVLSNSRLLQPYIKCILDKDRCAPDA  
KELKEHIREALETECAKCTEAQKKGTRRVIGHLINNESKSWNELTAKYDPENKFTAKYEK  
ELREIKA-

>BmorCSP9

MKTIVIVCLLALTAVALARPEQYTDKYDTVLDLQSLISNRLLIPYVHCILEKGQCTAEGKEL  
KSHIKEALETNCACKCTKAQKGGTEKMIGHLINHEAEFWEELKAKYDPTNEFTKKYETELK  
RVTA-

>BmorCSP10

MRAVIFLYTCVFFVVVGQDINAMMSMPKYDERYDYLDVDDIFRNKRLVRNYVDCLINAQR  
CTPEGKALKRILPEALRTKCIRCTERQKRTSVKVIIRLKNEYPEEWAKLASRWDPTGDFTR  
YFEDYLAKEHFNTIPGSGL-

>BmorCSP11

MKTILILCALVSVVVCRPEEYSSQYDNFDVEQLVGNLRLLLKNYAKCFLDQGPCTAEGTE  
FKKRIPEALRTKCAKCNPKQRHLIRTVVKAFQTKLPDLWEELAIKEDPKGQYKHEFTAFIN  
AMD-

>BmorCSP12

MKGFYVLCFALFAAVYCKETYSSSENDLDIEALVGNIDSLKAFIGCFLETSPCDAVSGDFK  
KDIPEAVAEACGKCTPAQKHLFKRFLEVVKDKLPQEYEAFTKYDPQGHFDALLSAVAN  
S-

>BmorCSP13

MKFVLLALIALAVVVAARPNDLDFYDKKYDNFNVDEIIDNPRLLKAYTFCFNDKGGKCTAEG  
NDFKKWIPESLQTS CGKCSEKQKYLVAKFVHAIKDKMPDEFDILRKLHDPKGEYTENLDK  
FLETYGH-

>BmorCSP14

MKILIIVVMACVAVTWARPESTYTDKWDNINVDEILES NRLLKGYVDCLLGKGRCTPDGK  
ALKETLPDALEHECVKCTGKQKSGADK VIRHLV NKR PDLWKELAVKYDPDNIYQARYKD  
KIDAVKGS A-

>BmorCSP15

MKLTSFLLVGMAMVSAEFYSSRYDDFDVKPLVENDRILQSYTNCFLDKGPCTPDAKEFKK  
VIPEALETT CGKCS PKQKQLIKTVIKAVIERHPEAWEELVNKYDKDRKFRPSFDKFINEDD-

>BmorCSP16

AHITDALQTGCTKCTGAQRKGIRRVIKHLIDSEPGYWDRLVDMYDPKRVYTGKYEKELRT  
IKA-

>BmorCSP17

MKSSLFCVLVLTVVVSSSRQQSYP RNDNINAILQNDRILLGYFKCVMDRGPCTKDGKTF  
KRALPEALPTACARCSNKQKA AFRTLLLAIRARSEPSFLELLDKYDPSRSNRELLYTFLATG  
L-

>BmorCSP18

MNLLIAIALALTL PFSIW CYDEKYDKIDVDKILSDDKLFTDYINCMLDKGPCEVEYSSEFK  
ELLPEVIATSCAKCTPIQKTGLRKT VKALS VKRPDDFSQFRAKYDPKGEYEKQFAAFVVAT  
D-

>BmorCSP19

MIENFYKCTISKSVLFLCLIFLPYALNQKYYDSRYDYDIDHLVQNPRLLKKYLDCFLGK  
GPCTPIGRFLKQVMPEVITTACAKCTPTQKR FARKTFNAFRRYFPETLMELRRKFD PESKY  
YDAFEKVITNA-

>BmorCSP20

MIEWKRFKILHFLSYLGLLVVVCAAQQNR PQVTD TALDEALNDKRFIQRQLKCALGEA  
PCDPIGKRLKTLAPLVLRGACPQCSPQETKQIQK TLSYVQRNFPQHWAKLVRQYAG-

>BmorCSP21

MPPNLKNIVFIGVCTCLVLTVLAAPQMSDAQLEKTLADKGTMQRHLCALGEGPCDMVG  
RRLRTLAPFVLRGACPQCSVQESRHIRT LAYIQRNYPWEWARIVRQYG-

>BmorCSP22

MNLLIAIALALTL PFSIW CYDEKYDKIDVDKILSDDKLFTDYINCMLDKGPCEVEYSSEFK-

>BmorCSP23

GNPKLLQTYFNCLLDKGECAPDAKELKIKLSTAKHLSIESIETVCAKCTEAQKKGARRVVIT  
VGSGLSLPLALMKSMGDGNHSPSGGPSVVSES-

>BmorCSP24

GNPKLLQTYINCLLGK GKCAPDGKELKIKLLVLLHTRCQVVF KINK-

>DpleCSP-1

MSDMQLERTLADRVMMQRHIKCALSEGPCDPTGMRLRTLAPLVLRGSCPQCSSQETRQIR

RTLAFVQRNYPWEWTKILSHVIVIFAMAALCFAETQRPAVSDTALEDALNDKRFIQRQLKC  
ALGEAPCDPIGKRLKTLAPLVLRGACPQCSPQETKQIQRTLSYVQRNFPQQWAKIVRQYSG

-

>DpleCSP-2

MLDKFKGGGPKAIFDIVTAHSAKRTVEYLAMAGLVIESNPPYCTELAPCDFYLFQELKIKIE  
VFILGALKMRSTINMKIVILLSLLSVVAANDHFYYNLIPLEVTALAKNPKQIFEFLDCLLDK  
GPCNDVFEGYRAVSLEAVQQACKRCTADQKRFGNIFLMLLRKLLPQEYHNFRYKYDPKN  
KYFDALEAELSKYKYLPC-

>DpleCSP-3

MKVVIILATLITLVLTQDTYSSDLENFDIDELLENDRLLESYGKCLEYKGPCTSQGREFRKL  
MPEAIRTNCLKCTLKQREMVRKAAKALNVKLPKIWNELVKQEDPKGEYKQKFEDFLQRS  
D-

>DpleCSP-4

MKTFVVFAMCLAAALALPADTYNPEYDNFNAKELVENPRLKKNYGKCFDQGPCTAEGS  
DFKKTIPREALRTTCAKCTPKQRELIRTVVRGFQKDLPEMWSSELVKKEDPKGEYKESFEKFL  
NGSD-

>DpleCSP-5

MKIVILLSLLSVVAANDHFYYNLIPLEVTALAKNPKQIFEFLDCLLDKGPCNDVFEGYRAV  
SLEAVQQACKRCTADQKRFVQRRLQMNRYKMKIFITLAALVINAVVAEEELYDLPLDMR  
EIARNPDQLKSFLDCLLDRAPCNPLYQGYRDLAPESIRESCRKCTPALKIFAYVFFTTLKTFL  
PEEYQNFRNKYDPDNIYIDRLEEEVRKYAFGTFSG-

>DpleCSP-6

MFDNIKALSLSAAASSLGCIESKRIIKMRTFVVLACLVSILAAEKYNSKYDNFDVETLVSN  
DRLLKSYINCFLEKKGKCTAEGTDFKKALPEAVETVCGKCTDKQKVNIRKVIKAIQKQKHT  
QWEELVKKNDPTGQHRANFEKFIQES-

>DpleCSP-7

MKIFILLLCVFAAVIAEENSIDLSTENIDLTEVVGNDKLIESYANCLINKGPCTPEMEKIKGLL  
PEAIATKCSKCTEKQKEVGSQLIKGVREKHPEIWKLLTTYFDPEEKYRESVEEFLKA-

>DpleCSP-8

MATLYIFIFATISTLVLAEFYSSRYDDFDIQPLENDRILFSYTKCFLDQGPCTPEAKDFKKAI  
PEALETTGKCSKPKQKQLIRKVIKAIIEKQPQAWQLVEKYDTEKKYRESFNKFIEEN-

>DpleCSP-9

MKSCVLLALLSLVAVAWGRPQHYTDKWDNINVEILESQRLLRGYVDCLVDKGRCTSDA  
KTLKETLPDALENDCKKCTEKQKTSADK VIRHLV NKR PDLWKELAGKYDPKDIYQQKYK  
NKIEAVKEKH-

>DpleCSP-10

MYLALETSQLSKTKIVKSQSVFLKVTREFYIVACIGAFDFEALVALVAARPEDNYDRYENF  
DVDELVSNLRLLLKSYAACFLGEGKCTAEGNDFKKWIPEAVQSNCGKCSHDQKHLVGKVI  
KACIDKLPEEWNKLNAIHNPDKYDEKLDLPGKIRKLNKMKFLVILALVALAAARPEAN  
YEKYENFDVDELVSNLRLLLKSYVACFIGEGKCTPEGSDFKEWIPEAVQSNCGKCSDNQKH  
LVGKVIKACMEKLPPEWKKLNALHNPDKYDEGLKNFLDNYGH-

>DpleCSP-11

MAVCYCRPDTYTDYDSIDLDEILRNRRLLVPYIKCILEEGRCSADGKELKSHIKEALEND  
CAKCTKAQQDGTKKVIGHLINKENDYWQQLVEKYDPEHKYVEKYEKELRA-

>DpleCSP-12

MDQGRCTPEGNTLKVHVTDIAIQNSCSKCTEIQKTKARKVVNYIRENNKDVWDELICKYD  
PKDEYKEKYEAFLEGKF-

>DpleCSP-13

MKSIFLVFLLAFVLNCAIADEQYYVLQKVNLSSESDIIGVMKNLMNCFLESPCSEAFESY  
RVRIFEAFQQACKKCSPEQKRFAAEFIQSLKAEMPEDYNDFIKKYDPENKYFDALEAELN  
KFI-

>DpleCSP-14

MDLFPISVLLVACFTAINQTYEKRYDSVNIDDVLSNKRLLAAYVKCVLDQGRCTPEGKEL  
KSHIADALQSGCDKCTETQKDGVRKVIKHLIKNERDYWKQLVEKFDPEGVYAEKYEDEIR  
DV-

>DpleCSP-15

MVIIIILAALVINAVVAEQEKYNSSLFDLEEVVNLAPESIRESFRKWTPALKIFAYVFFSTLKT  
FLPEEYQNFRNKYDPDNIYIDRLEEEVRKYAFGTFSG-

>DpleCSP-16

MGMRHFPKNCYKMMIIITLAALLINAVVAEEKYDLPLDMKEIAGNPNQLKSFLDCLLD  
RAPCKDVYQGYRDLAPESIREACRCKCTTELKIFAYIFFYTLKTFLPEEYQNFRNKYDPDNIY  
IDRLENEVSKYRLAAIAS-

>DpleCSP-17

MKTIIFLAVIAFAVADPELYDVVTLDMDKMEKDPQEFNSLIDCLDRGPCTPVFQTYRGIV  
QEATENICKKKNPYQKRAYWHFLRILRTTNPDYENFRQKFDADNVYVDILESVLRGFAN  
LK-

>DpleCSP-P10

MGIWLSSNNYVILRDLYKSLIMSTQYSFLLFEIFYVFWVWGDIDEMSEASYLLFTQTSVCY  
KASVFIINKKNLIVLLVSMKAKIFEPQSSIHYGILYRNARVVKNLCAVFLMSAITTCSLWTIM  
PLFDAAETRFPPFKIWMPVDPRDSPQYELGYIYQVMSIYISALLFVAVDNITLGMIMFGCA  
QLEIVIDKIKQLKNASSKHNERKERRKLICENKLLDECIKQHQS VIRFIETLENTYHANIFFQL  
TATVGIIICIGLRISIVEPRSVQFFSMLNYMVTMLSQFLYCWCGSHLTTKSEELREWLYQCP  
WYNQDPRFRKSVFIAMERMKRPIIFKAGHYIPLSRPTFVSVLRLSYSYFAVLNQAQNK

>DpleCSP-P12

MMPCVGYLFVAIAKFYKIERYKPVFINLISELREMWPEDNVTDEEQVISSALNRLRLVTKT  
YFYCNLILAFIFTL PANINLIKSLFGIEVPRILPFVYWMPFDPSKKVVFVVLIVQNIHCFLSA  
AYMLAGDLLFFVFLSHITTQFSL LAVRIQKMFYVPIDGQLPESYPLGYNNKENS LNPNQD  
TANNRCKVEEELKNIVIRHKALIRVVILIDHFQSTGVGEALYNSAWYVSSNSIKKSILIMIH  
RSQRRVHITTFGFSTVSMECYATVSVNITAVTLH-

>DpleCSP-P12-2

MAKIYKIKRYKPVFINLISELREMWPEDNVTDEEQAISSALNRLRLVTKTYFSCNSILGLIF  
TLPSIINLIKPLFGIEAPRILPFVYWLPDPYQEVIFEVVVIVQNSHCFLSAAFMLAGDLLFFS  
FLSNITTQFSL LAVRIKMFYAPIDGQLPESYPLGCSNEGILLNLSQDTSTNRSKVKEEELK  
EIKRHRSLIRLSNDVENMYSFSLVNFLNSSIIICFLFCCAVSTKTVKNY-

>DpleCSP-P20

MYPNPVYDEKRKKLIVMAILSVLPAFTLAGNDIRLRILNNDMANVVRQSILVSITFVIIFII  
SIARKDEFRSLLEEIDADYERFNGMSEYQQLVEDTIRKTRKVEKSWCFVLLVTTASYPVL  
AGACTIYSQLFSDYPRRYMVHELKAILISEEQYQSPYFEIVSLYTMIVIFLFIGFTGFDGM

FSVCLLHVSLKLIYQENLRNLFNEKDIQKIKYNI GLFVKNHCGVLRRIAQTCFEVWLV  
GIFINAVVQIGMAFTQITNQTESDINQMYLYALATVVHIYLP CYFASDVTYNAAEIANVAY  
SSSWERVQDSKIRSSICFIIAKCQTPVRLTALDMLTFNMELFVSVGHQM-

>DpleCSP1

MDSPYGCRVHRV LQGEASTVPGTSDPGV VSMKTLTPFSLFFMAKLCLGDNSYTTKYDGIN  
LDEILASHRLLTGYINCLLDKGPCSPDGKELKNNLPEAIDNDCHKCTQRQKEGADKVMHF  
IIDNRPEDWDKLEEKYNSDGSYKLYLTTKLSENSEDEVSKNYDEDDEEVNESRDHTSDND  
HDTEMENH-

>DpleCSP4

MGQPEGCNLS DQKMILKSCVVLCCVLCV LGDEKYTDKYDNVNLQEILENKRLL EAYVN  
CILDKGKCSPEGKELKEHIQDALETGCEKCTDKQMEGTTT MIDHLVKHERAMWKELTDK  
FDPKGIWRKKYEDRAREKGIVIPED-

>DpleCSP7

MADSPCLPPWILLIEKGGGHERAADALLSFGLVGSMG LLLSALCRIRRRLVSLKSIRVIFN  
GSPFLFLRQIFNMRTLILALVAFAAANSQYYVLEKLDMDLLVKNLDELKIFTNCLLEKIPCN  
KVHESYRVKTLEAVQEACKKCNPHTKHMFWEYLQALKADLPKEYIEFRHKYDPDNKYF  
DIHEAEISKYAIE-

>DpleCSP7-2

MYHRYIWFEVCDTTLTSRKNARATNPVQSGPQSSWKKLDREMLLEVVLVQSWLSASEDV  
EVEVEALWFRISMQRNLLEVLLNLMFKMKSVMILALFAFVAADKDYVLDKIDLSKIENN  
IEELKIFMDCVLDKGTCSDLNSYKVHIDESFKTACGKCTPEQKQFVSQFFKLYRKVLPQD  
IEELINKYDPERKYIDDLAEVDKYNV-

>DpleCSP7-3

MLKGATWQSAYLMVVPSPMDSLIGEEERRKRWENGGKSKRGKGGQPALT LIGRSEAI  
KNYFTPIFCERVYKKERGLKHRHTRLYQAHYIKGIKSKKKMKLLFLLVLVSFAAAEEQFYS  
LQKIDLSKAEENIGEFKKFTDCLLEKGPCSDVYESYRVRVNESLQSACGKCTPELKQFAAK  
FFEILKNYLPQEYDGFLLKYPENKYVDVFMAEVLKYKV-

>DpleCSP11b

MKVIIVLSALLVLSSAETYNSENDLDIEKLVSDPASLGAF LDCFNKDGACDELSGDFKKD  
LREAVEQACEKCTAAQKHIFKRFLVIVKQKADDDYKIFQQKYDPENKYLPALEAAIAKY-

>DpleCSP12

MILTVTCVLSYDEKYDRLDVDAILADDQHFTSYLDCFLDKAPCTTEYSKEFRELLPEVIKT  
ACEKCSDTQKVKVRKFVKAI FEKKAEMAQEFRTKFDPTGEYEP AFLAFLKQNK-

>DpleCSP13

MRCLLLALCALT VVASGVAQQNQFLHRYDNFNPD SIIQNERILLAYYKCVMDKGPCTKDG  
KNFKRVLPELTLSTACGR CSPNQKIVVRKMLLGIRAKSEPRFFELLDKYDPTRVNREALYSF  
LITGDERNF-

>DpleCSP15

MKIVYFIFFIVFGVFADNKYYDSRYDYDIDHFVQNP RLLKKYIDCFLDKGPCTPIGRVFK  
LVLPEIVITACNKCSPSQKRFAHRTFEAFRNISPQNYAELRRKLD PQNKHFNTFLKSIATNS-

>DmelCSP1

MLLNKNRVISLVVNFILILISSSVQADERNINKLLNNQVV VSRQIMCILGKSECDQLGLQ  
LKAALPEVITRKCRCNSPQQAQKAQKLTTF LQTRYPDVWAMLLRKYDSA-

>DmelCSP2

MKASLALVFCVGLAAAPEKTYTNKYDSVNVDEVLGNNRVLGNYLKCLMDKGPCTA  
EGRELKRLLPDALHSDCSKCTEVQRKNSQKVINYLRANKAGEWKLLL NKYDPQGIYRAK  
HEGH-

>DmelCSPA7a

MGPITLLLSILLVHSCRAEKPYVELNTFTMDDTIENQENWVDWGTLSMKKVSRNQFVVS  
GDFEFKLNMADEQKIVLMVYVYDSNANQRGSMVMAVKKPFCQFIKEDEDSYPSIQKASN  
LPDQDTCPPFKGKYTIDNYELETNFLPDNAPKGDYLLQLSLLDREVPVAGLVATVTLT-

>DmelCSPA29a

MWHCELKVFLILWTVSQVYIPCWGKKFISRFESINGIEGKETLFTCSVRLVGRERMLNGS  
IMHQVDLDDSFVWMDILHFKNGEWAQGNIKVVRTKPCDWFTNYFGKYFLPLVKDSNLPP  
IQEMCVFPKGEYYLRITKIEPQNWPPIYRGLNQFNINYVRDYGKSTGGIQFVIDLEDSTL-

>DmelCSPB38a

MISISTILALVSSVWATDYTFEFSDLYSECSEKLPGAIGLREAFDMRNIVTELDIDGLHL  
SGNCTTIWDVPSTDRISLRMTVMHFDRGTWQPTVFNTYARDFCAVMFDKELSWYKYWL  
KYFANREEISEKCIGTKGTVLVYKPFIVKPLIQNVIGPIYRGRVKAIFNFESFDKNNVKGATD  
VCFEVRGQVEKIK-

>DmelCSPB38b

MIRGLVILV LALANTWATDYNALIDDEGIYVKCSEAPAGTLGPRDVFNIDNMVMHMEPEG  
IYVSGNMTVKLNFLPSDRISARFSVMHYERGSWQPTMFNLHSPNFCEVMFDEDQYWFKY  
WFRYIRNKEEIREKCLKVKDTVLYDEFLMVLHLENVNTSNLQGRYKAVITLFAFDEHNV  
RRPSSLCVEIRGDLERVT-

>DmelCSPB38c

MFATLLILGSTDILATDYILLVEDPDIYTPCTDGPPGSVGLNEAFDVSEM QVEMDEEGIH  
VSGNITTRWSLPPTYRISARMSVLHFNRGNWEPTVFNTLTPDFCDAMFNPNLFWYKYWF  
KNFENREEIQEKCLATQGTVLVYNPFVVVPRLNNVLGPTLKGRYKVVFLFEAFNEQDERQ  
PSSVCFEITGDAEKIKN-

>DmelCSPB42a

MKATFTILVLQVVICLAGATEYQLTLDKDGLLAPCENQPGNPSGFAMVDTSSLKVHNLG  
SKVRIEGEQKVWVKDVQPGDTLKVFGQVYRLDKGTWQKTMFTASSNNFCKNMFDKNQ  
YWYNFWTKYISNSDEIKEKCLTPGAVLKYKDYELDLKTSLNVPNL DGRYKLVVQIEAFD  
KRNVRPVPICIEFRGTAGQV-

>DmelCSPB42b

MIFVLLLLLGVTSWATDYELLEDPDFSTCTDGPPGSINIRQALNLDDIVIDQKGDILHVS  
GNATVVWDVQPTDRITARLDVFHFNRGTWEPTVFSMATQNFCSIMYDKNQYWKYWTR  
FITNRHEVEKKCFRGPDTVLVHEPFDLILKFENFRGPLLRGRHKLVLFNALDERNIPRPNI  
CLEIIGEPLKLQ-

>DmelCSPB42c

MRTLMLFVFGFASSWAADYELLEDPDFSPCTEPPPGSIGFHDAFDIGDLVVDQDMDIIHL  
SESVTSIWDVEPTDRISARFAIMHYNRGSWEPTVFSMATPDFCASMFDENQSWFKYWTKH  
ISNRDEVMEKCFKTRGTVIMHNPFDLQLRLTDIRGATLRGRYKAVVTFEAVDEKDVPRRN  
SICFEIRGEAEKIN-

>DmelCSPA46a

MSLELHKVLLVLSIAHSALVRAGLECRISISKVFGDNETLFEFNFRVIGRQRLNGLTNFH  
VDLDDDYEMSNEVLALKDGEWESTSVSARFKTCKYMAVIYDKYFAVSFKDSNIPKGTEA

CPIKKGEYYARNVEVIADNWAHYAKLGLVRSNMLVRKNNV VYGGFDIVLVLSQKIV-

>DmelCSPB53a

MLELILILNVVHLSLQISYEFEIEDESIYSDCSDVPPGTLNISGLFDLTNYTTTITADGLSVSG  
NMTSVFNAQPTDRIELTGNLLFFDRGAWQPTTLNMMVRDFCAV MYDKKQLWYTDWSSH  
VVNRDEIKDNCIKVPGTLFLIESYNMMLVFGSGIPLGTGRYSIRVQVFAYDQKGKKRPNNV  
CYEVKGNFYKESNICISKPILITINVLAESLKSQMSSTNHANI-

>DmelCSPB53b

MSQQLFRIWQLLVMAFIPHSIEVSYEFTMEDERITSDCQNEPPKTLNIDGLFDM SNIDFEM  
AEDGVQLSGYKTVVWDIQPTDRVELQGSVQYFDRGTWQPTTLNMLVKDFCHVLFDKKQ  
VWYDAYSKHITNSAQINNTCFRVKGSVIEFETYTIGLEFGSGIPLHRGRYAIRLKFRAF DKN  
GKVRPNEICFEIKGQFSKKS LG-

>DmelCSPA56a

MSFWWMIQSLILWTVSVGSKKSNYEVRFESIDAVKGSTETFLYQLRLLGRNRMINGTLI  
FLEDLDETFDVL FESHAFKNGYWVKGIVNAAASKPCEFFNRYYSFFLVKSTESNLPTTGA  
EMCPFRKGT YFVKNGVVSTEDWPPIVFKGLNRFTISYLKNGECVGGVQLTISIAE IIT-

>DmelCSPB74a

MDFQFSVLCQILIFLTA AQPSIGGYFEYVLDDSEVFSECFNTPPGYANVSGLFDVSTVNFEM  
GPEGVHIDGHVTSTWDIQPTDRIEGRNLNVHMDRGTWQPTVLMVCKDFCKTFLDPNQ  
YWYNVFPKHIINKDEARQKCLNYKGT VYFVEPYTLQMHFGLGLTLPSGRNRMVINLVAID  
ENNVTRPNGICFEVKGDFFKIE-

>DmelCSPA75a

MKWLVIIVLLQLEKIKCEQS YEVTNERLEPFEGDSQTLVLF DGLKTIGRERALNGSFKFLG  
EMNNDDFKVSVELYSSPNGDGEFKRMVMDVPQTSICECFKKFYVQFVQPSLKTGETT NFP  
VVDDDFCPVPEGEFYVKNVILNTQDWPSQVPRGIVKAIITFFSGGKNVGG LIVEVKIEDRQ  
S-

>DmelCSPA84a

MKQFLFCVLIMLIGKTCALIPRTYETRFISITSNGTNLFD FSQIRFLGRERMANGTFELKEDL  
DNESFSVVG ETFIDSVGDGEYKQLPFTAPKQSVCTALKAYWSYFEP SIKYGVKTD FPAHTH  
PCPLPKGIYYIKDVVLKNDNWPVIMPRGYLKAVANL FKNDEYGG SLEIVSQISDLS-

>DmelCSPA86a

MLKYTVLVLLIGIPKLLLQAQMSYEAIFVSVTSEENSKPFDLSNLRLIGRERILNGT FEILED  
LDDEHFQISVEIYTN PARDGNYKLLPMSVPRQGVCTFFK KYGFYFRDCIKNGINTDLFLNT  
TSCLFPKGHYLKNVTINVQNWP KIMQRGLCRHIAFFYKNNVPMGSYNLTSSIEDRAPNF  
NLRPL-

>DmelCSPA87a

MGSSLCPVSYLAVLAIIVLTSNITVQAKRTFRIQKLEKV TEDTSYLRSRLRIA ESEENELKVS  
GYLDLNQRLDNDWT VVLKVS RSPSDGDYEVLT FEMQLCDFMKSYYKDIF YERIKEYS  
NAPHPSSCPLPKERYVLEDY PFNVKLLK KLMSPGFYRIKYTLKNEETKILSYVLDLELEEN-

>DmelCSPB93a

MGCETSVLCTLLIFFQIIGRSFEMSHDFVPIKDDLLSKCEDKPEM GYLDAFVDLSNFSRKR  
GPGGVNISGNITTIWDVDP SDVVEIDVSILKFEGDKWIPTIIKGNVKDFCKSFYDKNTLYYS  
YSTKHVVNKKEAKEKCITTPGAILLWEPYLLKISFSYAVPLNVGRHKAVLIFTAIDKAGVK  
RDRDICMEIVGDIVNA-

>DmelCSPB93b

MDRQQVTLNLIISLTLQIISPSFALNHFFIPEREELFSECLDKPGFSYVNELADLSRFNRKK  
DADGAMNISGNITMLWDVEPSNRVAVEVNIEKFEGGTWNPTLFGGDKDFCKNFYDKNT  
IYYPFSTKHVINKQQVKDKCITTPGTVLVLEPFILKILINFAVPLSPGIHKAVIIFS AFDKSGVK  
RPRDTCIEIVGEIVNI-

>DmelCSPA98a

MDAKIIILALVSLFYKANGAFYELSVADEEIFSSCPNPEPGTLDIHGLFDFSEFSTSLEADGLT  
VSGNQTLVWDIQRGDRVQLFIKLFYFDRGTWTSTAFSILSQDFCKTMYDKSNVLYEPWTG  
HVMNDVKDQCINAPGTKLILDYFLSLSASVTVPLREGRYKTTIKFRAFDSKGTERPTSIC  
CEVIGDVFKIRN-

>HarmCSP

MKVLLVLCLFAAAALADDKYTDKYDNINLDEILENKRLLLAYVNCVMERGGKCSPEGKEL  
KEHLQDAIETGCSKCTEAQEKGAYKVIEHLIKNELDIWRELA AKYDPKGDWRKKYEDRA  
RANGIQIPE-

>HarmCSP1

MRAVLVFCALVYAVAAQDVSDMVNMPKYDSRYDYLDVDAVFTNKRLVRNYVDCLINAV  
RCTPEGKALKRILPEALRTKCVRCTERQKRTAVKVIKRLKNEY PDEWAKLASRWDPTGDF  
TRYFEEFLAKEQFNTIPGSAGIGSEIPTSSPLAPPRAPTVAPT VATPTAAATEPTPPRPVVLNR  
FGDEGELMMGSPSSAGITPRPMTQATTRPTTMRPVNTRPVPPRPTMMTWAGAASNTQPT  
RFPLRPSPSDVPPPYSTAITLIDQIGYKIIKTTELVTDLLRNTVRAVVGR-

>HarmCSP2

MKTAIVLLLALFGVLTARFDNIDIDKVLGNQRVLESYLKCMYDEGPCTPEGRDLREKAP  
EALETNCKDCTDNQKALVRKASFLIKNRPDDWKKLSDKFDPEGKYKKA FDEFLKEKN-

>HarmCSP3

MKAVFLLCLVVAVSARPEAQYTNKYDNVNLDEILVNKRLLPYIKCALDQGGKCSPDGRE  
LKSHIREALENYCAKCTPVQQDGTRRVIAHLIKHKLEEWELKAKYDPEGKYTHKYEKE  
LEEYQH-

>HarmCSP4

MQTRYAVVLCCVVAACVAQTQRPPVSDSALEDALQDKRFIQRQLKCALGEAPCDPIGKRL  
KTLAPLVLRGACPQCTPQETKQIQRTLSYVQRNFPQQWAKIVRQYAG-

>HarmCSP5

MKSLLLLCLVIAAVWARPETYDTRYDDFDAETLVENVRLKAYGHCFLGTGPCTPEGSDF  
KKTIPDALRTGCGKCTAKQRHLIRVVVQGFRSKTPDLWQQLVKKEDPNGQYKEVFTRFLN  
GSD-

>HarmCSP6a

MKLIVAVALLCLVAESWAASTYTDKWDNINVDEILESQRLLKAYVDCLLDRGRCTPDGKA  
LKETLPDALENECSKCTDKQKSGSDKVIRHLVNKRPEMWKELSAKYDPNNIYQDRYKDK  
IEAVKGQ-

>HarmCSP6

MKADCFLFVTLIAVVAADFYNKYDSFDVQPLENDRILLSYTKCFLDQGPCTPDAKDFK  
KVIPEALETTCGKCSPKQKQLIKTVIKAVISRHPDAWDQLTEKYDKDQKYKESFDKFLAEQ  
D-

>HarmCSP7

MNSLIVFCVLSLAALTIARPDGATYTDKYDNVDLDEILGNRRLMVPYIKCMLDQGGKCAPD  
AKELKEHIREALENGCAKCTDKQKEGTRRVIAHLIKHKNADWQKLKAKYDPEGKYTHK



YEKELEEVQH-

>HarmCSP8

MKCIYVLSFLLALAAVQAEDKYSTENDNLDIDAVVANVDTLTSFVACFVDQEPDAVAAD  
FKKDIQEAVTTRCAKCTDAQKHIFYKFILGLKEELPRGYEEFGRKYDPENKHFSALNAVS  
PA-

>HarmCSP9

MNSLIVFCVLSLAALTIARPDGATYTDKYDNVDLDEILGNRRLMVPYIKCMLDQGKCAPD  
AKELKEHIKEALENECGKCTEAQKKGTRRVIGHLINHEADFWNELAAKYDPERKYTTKY  
EKELKEVEA-

>HarmCSP10

MKVLVLSCLIVAAFAADKYNKYDNFVDVTLITNDRLLKAYINCFLDKGRCTPEGSDFK  
KTLPEAIETTCKGCTDKQKNNIRKVIKAIQQKHPKEWDALVKKNDPSGKHRANFDKFIQG  
SR-

>HarmCSP11

MNSAIVLCVVALAGMVLARPDGGTYTTKYDNVDLDEILANDRLLIPYIKCLLDEGKCAPD  
AKELKEHIREALENGCAKCTDKQKEGTRRVIAHLIKHKNADWQKLKAKYDPEGKYTHK  
YEKELEEVQH-

>HarmCSP12

MNSAIVLCVVALAGMVLARPDGDGDKYTSKWDNIDLDEILGNDRLLVPYIKCALDEGKC  
APDAKELKEHILEALETGCDKCTDKQKEGTHRVAIAHLIKYKLEEWELRAKYDPEGKYA  
KKYEKELEELKRA-

>HarmCSP13

MKVLLVLCVFAAAALADDKYTDKYDNINLDEILENKRLLLAYVNCVMERGGKCSPEGKEL  
KEHLQDAIETGRSKCTEAQKEGAYKVIEHLIKNELDIWRELA AKYDPKGDWRKKYEDRA  
RANGIQIPE-

>HarmCSP14

MNSAIVLCVVALAGMVLARPDGDGDKYTSRWDDVDLDEILENDHLLIPYIKCSLDEGKC  
APDAKELKEHIQEALLETGCAKCTDKQKEGTRRVIAHLIKKQLQEWELKAKYDPEGKYA  
KKYEKELEEVKNA-

>HarmCSP15

RPESQYTNKYDNVNLDEILVNKRLLVPYIKCALDQGKCSPDGRELKSHIREALENYCAKC  
TPVQQDGTRRVIAHLINHEPDYWRQLSVKYDRDGKFAVKYKELRTIA-

>HarmCSP16

MKILVLLLA AVVTAQYEEDTYGTDHDDL DIVALVEDKDQFNSFIDCFIDEAPCDDVAETFK  
SVIPEAVLEVCAKCTPAQKHIVRVFNESFKKMPKFKQKFNKYDPEGKYFENFEAAVGA  
F-

>HarmCSP17

ASTYTDKWDNINVDEILESQRLLKAYVDCLLDRGRCTPDGKALKETLPDALENECSKCTD  
KQKSGSDKVIRHLVNKRPEMWKELSAKYDPNNIYQDRYKDKIEAVKGQ-

>HassCSP

MKVLLVLCVFAAAVLADDKYTDKYDNINLDEILENKRLLLAYVNCVMERGGKCSPEGKEL  
KEHLQDAIETGCTKCTEAQKEGAYKVIEHLIKNELDIWRELA AKYDPKGDWRKKYEDRA  
RANGIQIPE-

>HassCSP15

RPESQYTNKYDNVNLDEILVNRLLVPYIKCALDQGKCPDGRELKSHIREALENYCAKC  
TPVQQDGTTRRVIAHLINHEPDYWRQLSVKYDRDGKFAVKYEKELRTIA-

>HassCSP16

MKILVLLLAADVTAQYEEDTYGTDHDDLIVALVEDKDQFNSFIDCFIDEAPCDDVAETFK  
SVIPEAVLEVCAKCTPAQKHIVRVFNESFKKMKPEKFQKFKNKYDPEGKYFENFEAAVGA  
F-

>HassCSP17

ASTYTDKWDNINVDEILESQRLLKAYVDCLLDRGRCTPDGKALKETLPDALENECSKCTD  
KQKSGSDKVIRHLVNRPEMWKELSAKYDPNNIYQDRYKDKIEAVKGQ-

>HassCSP18

RPDPTDKYDNVDLDEVLSNRLLVPYVHCLLEQGKCAPDAKELKEHIREALENACGKC  
TDAQSGTTRRVIGHLINKEPEFWKQLNAKYDPNNKYTKKYEKELKEVQEDKQNH-

>MsexSAP1

MKMLAVLCLFVLGALSAPERDGDLYDMFDAEMILEDDKLRKAIDCLLDRGVCCDYQPI  
RDKGPRLIKTRCEDCTPEQKAVFEESMKILEEKFNDFKEIIAKYA-

>MsexSAP2

MKYLLVLCVVAAVVCDDKYTDKYDNVNVDEILANERLLKGYVDCVLERGKCTPEGKE  
LKEHLRDAIETGCKKCTKPQEEGATKVIDFLIKNKLEVWRELVAKFDPEGKWRKKYEDRA  
RANGIVIPE-

>MsexSAP3

MKTFVALCLLSVVAVTLARPDHYTDRYDNVNLDEILDNHRVLPYIKCILDQGKCAPDAK  
ELKEHIREALETECSKCTNAQKNGTRRVIQHLINHEPEYWQELGDKYDPERKYTVKYEKE  
LREIKA-

>MsexSAP4

MKMLLVISCCVALPWALSASTYTDKWDNINVDEILESDRMLKGYVDCLLDKGRCTPDG  
KALKETLPDALEHDCSKCTEKQKVGSEKVIRNLVNRPALWKELSAKYDPNNLYQEKYK  
DKIDSIKGQ-

>MsexSAP5

MKPVTAAILISLACMVQCGKDMYTSRYDSMNVDVIGNHRLLHAYIKCMLDEGRCTAEG  
RELKKHITDALQTGCSRCTDAQKKAIRHVIKHLIEHEHDFWALLVEKYDPHRIYTTKYEAE  
MKRTMRSKEQMSESGAGHEKADMKMMGDGPGYKADMKMMEGGSGHEKADMKMM  
EGGPGHEKADMKMMEGGPGHEKADMKMMEGGPGHEKADMKMMDKMSSKTGMAEK  
KGA-

>MsexCSP-1

MKCICLLFLVVAVYAEKYTEENDDLIEGVIKDADTMKAFTGCFMDTADCDHVSADF  
KKDLPEAIQTACAKCTDKQKHITKRYFEGLEEKYPELYQAFKNKYDPENKYFAALKAAIA  
KF\*-

>MsexCSP-2

KTLLPEVIATSCSKCNEIQRQNVKRVKALSNKKPDEFNEFRKKYDPNREHEKDFAAFVL  
AVD-

>MsexCSP-3

FWLNPNFTLDRWDSVDIDSILANRLLNPNYISCILEEGKCTPEGKELKSHIRDAMQTDCA  
KCTPVQKAATERVIAHLLKHEHESWNKLTAKYDPTGAYTKAHHDLKSLAA\*-

>MsexCSP-4

MQVTYVLLVCVVVASCVAQQAQRPVTDTALEDALNDKRFIQRQLKCALGEAPCDPIGK  
RLKTLAPLVLRGACPQCSPQETKQIQRTLSYVQRNYPQQWAKIVRQYAG\*-

>MsexCSP-5

KSHCSLLANKKHIFVTMKTLVFFLCLVLAVLADEKYETINEDFDVAQVLENERLLNSYA  
KCLLNKGPCTPEVKKVKDKLPEALETHCAKCTDRQKAMGKQLAQEVQKRYPDLWKELV  
ALYDPEGKYQDAFKEFLAN\*-

>MsexCSP-6

MKWQIAIALMVVAVVSCDEKYTTKYDNINYKEILENKPLLHNYIKCTLDKGRCTAEGNE  
LKSKIKDALQTGCIKCSKQKQR\*-

>MsexCSP-7

MKTILVLFALVA AVACEEYYSTQYDNFDANELVSNVRLKKNYGKCFLEGPCTVEG-

>MsexCSP-8

MKTWLLCLVLTVVVSRSTQQNYPRNENININAIMQNARILLGYKCVMDK-

>MsexCSP-9

TLNDKATMQRHLKCALGEGPCDPVGRRLRTLAPLVLRGACPQCSPQETRHIRRTLAYVQR  
NYPWEWARIVRQYG\*-

>MsexCSP-10

MQILLTHAEENSTYTTEYDGFDIRVMRNERLLTSYVNCCLDKGPCTAEGKELKKNLPDA  
AQNDCKKCTQRQKENADLMIQYMEENRPADWNKLELNTSGERVAGASERHISVNTKRA  
LFHT-

>MsexCSP-11

NLNRQRKYFRFTLKTMEAKCTLFILLVAMVSADFYSSKYDDFDVQPLENDRILLSYTKCF  
LDEGPCTPDAKDFKKVIPEALETSCGKCTPKQKLIKQVIRAVIDRHPESWDKLVHKEYDE  
DNKYKDSFNKFLAEKD\*-

>MsexCSP-12

LYLVKMRLLVIMSLFALSVAARPDASKYPSRYD TVDLDMIVNNKKVLESYKCVLDEGK  
CTPEGKEL-

>MsexCSP-13

MRTVIVLTLVAACFAAEKYNPKYDNFDVDTLISNERLLKAYINCFLDKGRCTPEGTDFKK  
ALPEAVETCAKCTEKQKVNIRKVIKAIQQKYPKQWEELVKKNDPSGKHRANFDKFIQGS  
\*-

>MsexCSP-14

MLDTMNAIRVLVFCVCMYVVVGQDINQMANMPKYDSRYDYLDVDAIFTNKRLVRNYV  
DCLINAQRCSPEGKALKRILPEALRTKCIRCTERQKITAVKIIERLKYEYPEEWAKLSSRWD  
PTGDFTRYFEEFLAKESFNTIPGSGSTVNEVSVTTATP-

>MsexCSP-15

RLETYCAKCTEPQKEGTRFVIGHLVKNEKEWWRKLSDKYDPERKYVTKYEAEKLSIS\*-

>MS|comp116602\_c0

MKTFLICALVVAVCARPEEQYTTEYDNIDIDEILNNDRLFKSYFECLVGEKCTPAGKELK  
SHMPDALQTECSKSPKQKEGTTKVMKFLINNKPEQWKRLCAKYDPEGKYASKYEKEL  
KEVSQ-

>MS|comp141234\_c0

MRVLIVLSCLVLAFAAEKYNKYDNFDVETLISNDRLLKAYINCFLDKGRCTPEGSDFK  
KTLPEAIETCAKCTEKQKGNIRKVIKAIQQKHPKEWDDLKKNNDPSGKNRANFDKFIQG

SR-

>MS|comp142679\_c0

MKFVVLVLCFLFAAATLADDKYTDKYDNINLDEILENKRLLLAYVNCVMERGKCSPEGKEL  
KE-

>MS|comp147733\_c0

MNSAIVLCVVALAGMVLARPDGGTYTTKYDNVDLDEILANDRLLVPYIKCLLDEGKCAP  
DAKELKEHI-

>MS|comp148349\_c0

MKTWLLCLCVLTVVVSCYSQGPNNRYENFNADAIQNDRILLAYYKCVMDKGPCTRDGKN  
FKRVLPELATAACGRCNPAQKTIVRKLKLLGIRTKSEPRFLELLDKYNPDRSNRDALYTFLLT  
GQ-

>MS|comp148423\_c0

KEHIREALENGCAKCTDKQKEGTRRVIAHLIKHKNADWQKLKAKYDPEGKYTHKYEKE  
LEEVQH-

>MS|comp149055\_c0

MQIKYALLCCVAASLAQTQRPAVSDTALDDALQDKRFIQRQLKCALGEAPCDPIGKRL  
KTLAPLVLRGACPQCTPQETKQIQRTLSYVQRNFPQQWAKIVRQYAG-

>MS|comp149356\_c0

MKADCVLLATLMAVVAADFYSSKYDSFDVQPLENDRILLSYTKCFLDEGPCTPDAKDFK  
KVIPEALETTGKCSPKQKQLIRMVVKAVIERHPEAWQQLSDKFKDKRKFKDSFDKFLAE  
ED-

>MS|comp149520\_c0

MKVVLLTLCLALGVLAQDKYESANDDFDVSEVLSNPRLNLSYSKCLLNQGPCTPEVKQV  
KEKLPEALETRCAKCTDKQKQMGKALAEVKKNHDPDIWKQLVAMYDPQGKYQQAWQD  
FLKE-

>MS|comp152291\_c0

MKLLIVLALVAAALARPDDSHYDEKYDNFNIDEVITNERLLKNYAHCLIGDGKCTPEGNE  
FKKLLPEATKSNCGKCTDKQKVHVAKAIKAIKEKLPTEYETLRSQIDPEGHAEDINKYVA  
KYAP-

>MS|comp152624\_c0

MNALLIAIFALAVPTALAYDEKYDKIDVDKILGDDAMFTAYINCMLDKGECTQEHSADFR  
KLLPEVIATSCAKCNAIQKQNVKRTVKALSEKRPDDFVAFRAKFDKGEYKDFTAFTVMG  
TD-

>MS|comp154103\_c0

DGKELKTHIREALEQDCAKCTKAQRDGTQVMGHLINHEVDYWNELKAKYDPKNLYST  
KHEQELRKLKQ-

>MS|comp154103\_c1

MNSFTVLCLFALVALAVARPDGKYTDRYDSVNLDQILSNRRLVPYIKCMLDQGKCTPDG  
KELKTH-

>MS|comp154133\_c0

MKFVLLLCVMVAAVVADDKYTDKYDNIDLDEILSNKRLLEDAHYKCVMDKGGKCTAEGKE  
LKDHLTEAIENGCAKCTENQEKGAQKVIDHLIKNELDMWRELA AKYDPTGNWRKKYED  
RARAAGIVIPAE-

>MS|comp154647\_c0

MKLIVAVALLCVVAMAWGKPASTYTDKWDNINVDEILESQRLLKAYVDCLMDRGRCTPD  
GKALKETLPDALENECSKCTEKQKSGSDKVIRHLVNKRPDWLKELSTKYDPDNIYQDKY  
KTQIESAKQ-

>MS|comp154792\_c0

MMMMYSSLAMMLLTYLTIQSNATETSTYTTKYDGDLDLDEILNNERLLIGYVNCLMDNGPC  
TADGKELKKNIPDAIENDCKKCTDRQRDGS DRV MHYLIDHRPDDWVKLEEKYNSDGSYK  
MKYLSSKKTEDSKETNVTKSDEETKNSKE-

>MS|comp155046\_c0

MNFLVLSVVVTLAAFATADLTYTDYDHDVNVDEILDNRKLLVPYIKCTLDQGRCTPDGKE  
LKAHIKDAMQTGCAKCTKKQKKAACKVVKHIRAKEQDYWKQIVNKYDPGNEYTETYE  
AFLASPDESK-

>MS|comp156988\_c0

MKSYIALLVLSVAAMALARPEEAKYTDYDNDVLDLDEILSNRLLVPYVKCILDQGKCAPD  
GKELKEHIKEALENECAKCTETQKSGTRRVIGHLINHEDAYWNETAKYDPQRKFTAKYE  
KELKEIKQ-

>MS|comp158640\_c0

MQIIILTALCVGLVAGLHVQAGPQMTDAQLEQTLADKNTMQRHIKCALGEGPCDPVGRRL  
RTLAPLVLRGACPQCSMQETRQIRRTLAFVQRNYPWEWAKIVRQYAEFKLRTLSVT-

>MS|comp160411\_c0

MVNLFLKMRVFLCVLVYVVVGQELNDMGNMPKYDSRYDYLDVDAIFTNKRLVRNY  
VDCLINSVRCSPEGKALKRILPEALRTKCVRCTERQKRAAVKVIRRLKNDFPPEWSKLASR  
WDPTGDFTRYFEEFLAKESFNTIPGSGSAIPTSSPLAPPRPIPTMPPTIASPAPGPTEPTPPRPA  
ILNRFGEDELMQGSPPSSGVMTPRPMQTATPRPTTMRSTVNSRPVPPRPTMMTWAGAAS  
NTQPTRFPLRPVSDLPPYSTAITLIDQIGYKIIKTTELVTDLLRNTVRAVVGR-

>MS|comp160989\_c0

MKTILVLCVLIAAVCARPEATYDTRYDNFDVESLVENVRLKSYGHCFGLTGPCTAEGSAF  
KKTIPDALQTGCGKCSQRHLIRVVVNGFQTKTPDIWKQLVKKEDPNGEFKETFTRFLK  
ASD-

>MS|comp599465\_c0

MKLIVAVALLCLVAESWAASTYTDKWDNINVDEILESQRLLKAYVDCLLDRGRCTPDGKA  
LKETLPDALENECSKCTDKQKSGSDKVIRH-

>Pxy|CSP1

MKSAAFIALFLIGKAVCEDKPTYTTKYDNIDLDEILSSERLLTGYVNCLLDQGPCTPDGKE  
LKHTLPDAIDNDCRKCTQKQKEGSDRVMGYIIEYRPNDWAKLEKKYLSDGSYKKKYLEK  
KNAENNGDSKSTEAKNKDDEEKKSKGDGEEK-

>Pxy|CSP2

MQKLTACLVAVAAAAARPNDSHYTDYDNDVNLDELISNRLLVPYVKCVLDQGKCS  
DGKELKEHIQEALENNCGKCTDKQREGTRKMIGHLINHEQEFWDQLIAKYDPERKYVSK  
YEKELKEVKASCCWL-

>Pxy|CSP3

MNSLVLVCLALVAVAAARPQATYTSKYDGVNVDEILANDRLMMPYIKCALDHGRCSPEA  
KELKSHIKEALENNCAKCTDKQKPAVRKVIAHLINHKPAEWRQLSDKYDPAGKYTAQYE  
DQLRAVKA-

>Pxy|CSP4

MQTVTLLCCLLA AVAAAAA APADTYDAKYDSFN AHEL VQNQRLLKSYGKCFLSKGPCTAE  
GSDFKRVIPEALKTTCGKCTRKQRELVRVVVKGFQEQLPQVWTEIVSKEDPKGEYKDSFA  
KFLEGS-

>PxyI CSP5

MKVVFLVFLTAVVYSHPHDSHYTDKYDNIDLDEILNNKILTSYINCCLDLGKCTPDGKE  
LKSHIREALENKCGKCTEAQKNGTRKVMTHLINFEPDYWNQLCAKYDPEGKYKAMYEK  
EYKTLVH-

>Tcas CSP20

MRFFVIFVACVSVALARPEDQYTIKYDNVNLKEILQSDRLTENYVNCLEKKPCTPDGEE  
LKRVLDPALKTSCAKCTDKQKQGAKTVIQHLYKNKQDWWKQLEAKYDPEHTYVKAHE  
DELKAL-

>Tcas CSP19

MKFFIAFLMLLGAVWCEQYTTKYDNINVDEILASERLLKNYFNCIMDRGACTPDADDELKR  
VLPDALKSDCAKCSEKQKEMTKKVIHFLSHNKQMQWKELTAKYDPDGIYFEKYKDKFDS

-

>Tcas CSP18

MLFTVFLVLTCAHVVFLEEYVIPDNIDIDILSNERLLKNYVNCLLDKGRCTPEGKKLKSTI  
PEALSTDCAKCNEKVKANVRKVLHHLIDNKPDMWKQLEAKYDPSGEYRSKYKDELEKN  
GIHV-

>Tcas CSP17

MFKVLVVFVACVQAYVYAEYTVPNIDIDEILKNDRLTKNYLDCILEKGKCTPEGEELKK  
DIPDALQNECAKCNEKHKEGVRKVIHHLIKNKPSWWQELQEKYDPKGEYKSRYNHFLEE  
EGLN-

>Tcas CSP16

MTAIVFLALACLKTYVSSQEYLVPNIDVDEILKNDRLTRNYLDCVLGKCKTPEGEEL  
KKDIPEALQNGCAKCNEKHKEGVRKVIHHLIENKPNWWQELESKFDPQGEYKKKYDELL  
KKEGLAN-

>Tcas CSP15

MIFKIHFLVFGALLTYVSSVEYLILREIDTILKNDQMTRNYLDCVLGKCKTKEAEKLLKG  
ITETMKNCGVKCEQKQKEDVHKVFQHLMIHRPNWWHELETKFNPHHEIKLQHLHQSKF  
NPHEEVKLQHLHQFPHHDFLEREGFIR-

>Tcas CSP14

MFATSALFACIQGLVSAEYLVPNIDVDEILKNDRLTRNYIDCILGKCKTPEGEELKRD  
IPEALQNECAKCNEKHKEGVRKVLHHLIKNKPNWWQELEAKFDPKGEYKQKYNKLEK  
EGLQA-

>Tcas CSP13

MFLAIVLVVCACTNVLSEEYTNQYNDELDAALKSERLMKSYFECLLGTGKCTPSGEELKK  
DIPDALKNECAKCNDKHKEGIRKVIHYLVKQKPEWWEQLQKQKFDPPQGIYKKRYQNYLD  
KEGLKA-

>Tcas CSP12

MKTLVLVLFVAVLSVVFADKYTTKYDNIDLNQILKSDRLLKNYVNCLLDRGKCSPDGQE  
LKNNLADALQTSCSKCSQRQKDGSRTHIRYLIKNRDWWNELEAKYDPTGIYKNKYADEL  
KAEGIVL-

>Tcas CSP11

MKTLVPLFFVIAIASSLAENSKYTTKYDNVDLDEIISKDRLLKKNYVNCLEKGGKCTPDGA  
ELKRHLPDALHTECSKCSETQKNGSKKIMRHLIDHKRDWWNELEEKYDKEGEYRKKYE  
AEIKGKKD-

>TcasCSP10

MKTFVLVAFAAVLGLALARPQEKYTTKYDNIDLEEILKSDRLLKKNYFNCLMERGTCSPDG  
EELKKALPDALHSGCSKCTEKQKEGSRKIIHYLIDNKRDDWWNELEAKYDKDGVYRQKY  
KDVIEKEGIKL-

>TcasCSP9

MTAIVFLLALACLKTYVSSQEYLVPQNIDVDEILKNDRLTRNYLDCVLGKGGKCTPEGEEL  
KKDIPEALQNGCAKCKNEKHKEGVRKVIHHLIENKPNWWQELESKFDPQGEYKKKYDELL  
KKEGLAN-

>TcasCSP8

MPLVKSLVVVLLIGVVYVQVQGLAGNNYIEKQLLCALDKAPCDALGNQIKGALPEII  
GKNCERCDSRQVANARRIARYVQTKHPDVWNALVKKYSV-

>TcasCSP7

MKLISAVILCAFLVAVSAAENKYTNKYDNVDVDKILNDRVLTNYIKCLMDEGPCTSEGR  
ELKKTLPDALSSGCTKCNQKQKETAEKVIRHLTQKRARDWERLSKKYDPQGQYKKRYEE  
HVATSRAA-

>TcasCSP6

MIPLIAIAGILAVSAAPEFYESRYDHLDESILNRRMVNYAACLLSKGPCPPQGVDLK  
RVLPEALQTNCAKCTEKQRTAAAYRSIKRLKKEYPKIWEQLRAVWDPDDVFIRKFFETSFESG  
KPSGVISTNTSPPSPILSNRFGENEEADAASNVISSTPLPPTTSTTTTRTLTKFTTKPSTKPT  
NKPVVVTKPPQAPPFATVGANLQATVSFGTNLVGGIVRSLGTLGSRVVEGSKLANMVISIA  
AIRP-

>TcasCSP5

MKTFVILFFGVFFIIFSDVNGKTLHRSTRDDKYTTRYDNVDVDRILHSKRLLNINCLLE  
KGPCSPEGRELKILPDALVTNCSKCSEVQKKQAGKILTFVLLNYRNEWNLVAKYDPDG  
IYRKQYEIDDDYDYSELDSAKK-

>TcasCSP4

MYSYLIPLYLFLFVHYGWS EDTTHKYTTKYDNIDLENVVKNERLLKS YVDCLEKGRCS  
DGLLEKKNMPDAIETDCSKCSEKQKEGSDFIMRYLIDNKPDIWKALEAKYDPDGTYKKR  
YFESQKDEVSKVEA-

>TcasCSP3

MLFTVFLVLTCAHVVFLEEYVIPDNIDIDILSNERLLKKNYVNCLLDKGRCTPEGKKLKSTI  
PEALSTDCAKCKNEKVKANVRKVLHHLIDNKPDMWKQLEAKYDPSGEYRSKYKDELEKN  
GIHV-

>TcasCSP2

MKIILAVLIATAVAATYDVYPTKYDNVDIDAILHNKRLFDNYLQCLLKGKCNEEAAILRD  
VIPDALITGCRKCNHDKVSVKVIKERNSDWQQLISVYDPKGEYQTQYAHYLEKI-

>TcasCSP1

MLILQIAHLCAQFCLLAAIFTCVKPOLTRISDEAIESTLNDRRYLLRQLKCATGEAPCDPVG  
RRLKSLAPLVLRGSCPQCTPQEMKQIQKVLAFVQKNYPKEWNLKHQYAG-

### 3.OBPs

>BmorGOBP1

MWKLVVVLTVNLLQGALTDVYVMKDVTLGFGQALEQCREESQLTEEKMEEFFHFWNDD  
FKFEHRELGCAIQCMSRHFNLLTDSSRMHHENTDKFIKSPNGEILSQKMIDMIHTCEKKF  
DSEPDHCWRILRVAECFKDACNKSGLAPSMELILAEFIMESEADK-

>BmorGOBP2

MFSFLILVVASVADSVIGTAEVMSHVTAHFHGKTLLEECREESGLSVDILDEFKHFWSDDFD  
VVHRELGCAIICMSNKFSLMDDDVRMHVNMDEYIKGFPNGQVLAEKMVKLIHNCEKQ  
FDTETDDCTRVVKVAACFKKDSRKEGIAPEVAMIEAVIEKY-

>BmorPBP1

MSIQGQIALALMVYMAVGSVDASQEVMMKNLSLNFQKALDECKKEMTLTDAINEDFYNF  
WKEGYEIKNRETGCAIMCLSTKLNMLDPEGNLHHGNAMEFAKKHGADETMQQQLIDIV  
HGCEKSTPANDDKCIWTLGVATCFKAEIHKLNWAPSMDEVAVGEILAEV-

>BmorPBP2

MKLQVVLVLTVMVCGSRDVMTNLSIQFAKPLEACKKEMGLTETVLKDFYNFWIEDYE  
FTDRNTGCAILCMSKKLELMDGDYNLHHGKAHEFARKHGADETMKQLVDLIHGCSQS  
VATMPDECERTLKVAKCFIAEIHKLKWAPDVELLMAEVLNEVSWKS-

>BmorPBP3

MARYNIVVAVLVLGVVGARGSSSEAMRHATGFIRVLDECKQELGLTDHILTDMYHFWKLD  
YSMMTRETGCAIICMSKKLDLIDGDGKLHHGNAQAYALKHGAATEVAACKLVEVIHGCEK  
LHESIDDQCSRVLEVAKCFRTGVHELHWAPKLDVIVGEVMTEI-

>BmorOBP5

MKQRLRVLLRFCILQTVLSESGVDVVKNLSSLFARFFLECDEERHFQPEVRLKVMTFWY  
SESSTWDRDVGCAFLCIFKKMEIDNPQDPSYRTHLELLSFANSEDNKIANQMVEIFYACGE  
NTETDPCLWALEQVKCYKNRINQLGLTPTF-

>BmorOBP7

AVTEELKIEFTKLVKCTKDHPVDMSELMQLQQLIAPKKTESKCLLACAYKLNQVMTS  
QGLYNLEHAYKIAEMSKNGDEKRENGKKVADICVKVNDVEVSDGEGKCERAALIFKCT  
LENAPKVFKFGSSEYNCQ-

>BmorOBP8

MLRVVICVCFVLIAPYGINASSLDDLKVVYKNVIKECVGDYPITAADLKLKARQIPNDD  
IKCVFACAYKKTGMMTEEGMLSVEGIKDMSQKYLSDNPEQLRKSKEFAEACSSVNDQQV  
SDGTKGCERAALIFKCSTEKITNFGFEL-

>BmorOBP9

MLRVVICVCFVLIAPYGINAVSYEQKIKIRDQLDRAGFECFKDHKITEDDIKNLRANKPA  
TGENVPCFIACVMKKTGVMNDQGVIRKGPVLELAKKVLADDKDIKKLQDYIHSCHVNS  
ETVHDKGKGCEFAMQAYTCMSANASKFGFNI-

>BmorOBP10

MLRVVICVCFVLIAPYGINAVSDEQKIKIREQIDKSGFECFKDHKITEDDIKNLRARKPATG  
ENVPCFIACVMKKTGVMNDQGVIIHTEPVLQLAKKVLTDKDIKKLQDYIHSCHVNSKT  
VHDKGQCEFAIQTYTCMSANASKFGFDV-



>BmorOBP11

MSANSFVVLAFCALAVGVNALTEEQKAEITKSSLPLIAECSKEFSVNQGDIDAAKCLGDPS  
GLNSCFVGC FMKKAGIINASGLFDVAATIEKSKKYLTSEEDLKAFEKLTETCAPENDKPVS  
DSDKGCERAKLLLDCFVANKGSFSVFL-

>BmorOBP12

MTSFMVFFVLSVLTLYSDALTDEQKNKIQSKFIEIGAECIVEHPISIDDINSFKNKKFPSGV  
NAGCFVACIFNKIGLFDKGNLSHNSALEKAKGIFNADEEVKNLEEF LNRC AKVNGEAVG  
DGVKGCERAKLAYNCLIENSLEFGFNIDF-

>BmorOBP13

MLKIHVLLCFGMAILYFGSAKAVTPEESKAFAFAKPVIEQCQKDFGMDKESFAQKNLDEI  
DECLIACVVEKFGITNDEKIDGDALKALVTKFVGNEEERNKINKIVEECTEDANKSGDGTC  
NTSTILFLCLLNKNGKDLWGF-

>BmorOBP14

MSRQQLKNSGKMLKKQCMGKNDVTEEEIGDIEKGGFIEQKNVMCYIACIYQMTQIIKNN  
KISYEASIKQIDLMYPPELKESAKASAGRCKDVSKKYKDICEASYWTAKCMYEDNPKDFI  
FA-

>BmorOBP15

MFLKNIFIECVLLYFVMLNTSFVNTMTKQQIKNSGKILKKACISKNDVTEDEQISDIDKGGFI  
EDKNVMCYIACVYSMSQVVKNNKFVHDAMVKQVDMMPFTEMRDAVKASIANCRGVAK  
NYKDICEASFWTAKCMYEFDPANFVFA-

>BmorOBP16

MRISFLFLISVTIITFDSVFAMTRAQVKKMTIMKNQCMKNGVTEDEQVKGIEEGIFLENH  
NVMCYIACVYKTIQVVKNDRLDKDLISKQIDVLYPQEIRESTKKAVGDCINLQEKYDDWC  
EGIFRSTKCLYEKDPANFIFP-

>BmorOBP17

MTRQQLKNSGKIMKKTCMPKNDVTEEEIGQIEQGKFLEQRNVMCYIACIYTVTQVVKNN  
KLSYDAVIKQVDVMFPAEMRPAVKAAAENCKDISKTFKDICEASYWTAKCMYDFDPKNF  
VFP-

>BmorOBP18

MILVIAKFLILISLCETMTMKQIKNTGKMMRKSCQPKNNVDDEKINPINDGVFIEENEVK  
CYIACIMKMANTMKNGLNFEAAMKQADLLL PDEMKEPTKEAIVACRKVADSYKDVCD  
ASFHVTKCIYNHNPSVFFFP-

>BmorOBP19

MTSAKTDVEIKAWFLGQAVECSKDHPVTTEELRMHKHELPDSKNAKCLMKCVFRKCNW  
LDSKGMVDINAAYASSTKDFSDDKTKQENANKLFDTCVNEENVGDGEEGCDRSLLLA  
KCLTKAAPQVSIYYS-

>BmorOBP20

MAVHIFLILASYMALAAHGQLDDEIAELAAMVRENCADESSVDLNLVEKVNAGTDLATIT  
DGKLCYIKCTMETAGMMSDGVVDVEAVLSLLPDSLKTKNEASLKKCDTQKGSDDCDT  
AYLTQICWQAANKADYFLI-

>BmorOBP21

MITASLHVIFALLAFVYGGKDKPVLSEEIKEIQT VHDECVGKTGVSEEDITNCESGIFKED  
VKLKCVMFCLLEEAGLVNDDGTVDYEMFTSLIPEEYFDRATKMIFSCKELDTPDKDKCER  
AFEVHKCSYEKDPDFYFLF-

>BmorOBP22

MLKVFVVVVCTLGASQLCAALYTQKVAVSFPKDKTTIVVEAMKSCIAKTGANPNVIEVIS  
SGKVSEDEKFKEFFYCACNDIGVVNPDGHIKVKECIELFPKETQPLVEPVIKNCCKEYVNVK  
YDTLTKYKCFQETSPVVRTLA-

>BmorOBP23

MTSKVLLSCVVLAVLATTVLAEDSRKLVSFAPVAKKLVLIQECLNENGLGEDAIEVIRA  
GEYREDEPFQNLVYCAKFKFGALDENNRIISQVAAASFPKDIDVVTVIESCGKEDGNTPVE  
QVFKYFKCFQKNSPVRMQLY-

>BmorOBP25

MKSVVLLICLAFVFNCGADNVHLNEDEREKANWYTAECGVETGVSTEVINAAKIGKYSK  
DKAFKKFVLCFFKKSAILNSDGTLMVVALAKLPSGVNKSEAQSVLEQCKNKTGQDAAD  
KAFAILQCFHKGTKTHILF-

>BmorOBP26

MKSVVLLICLAFVFNCGADNVHLAETQKEKAKQYTSECVRESGVSTEAINAAKIGKYSKD  
KAFKNFVLCFFNKSAIFNSDGTLMNDVALAKLPPGVNKSEAQSVLKQCKNKTGQGAADK  
AFEIFRCYYKGTTHILF-

>BmorOBP27

MKSVVLLICLAFVFNCGADNVHLETQKEKAKQYTSECVKESGVSTEVINAAGTQYSED  
KAFKKFVLCFFNKSAIFNSDGTLMNDVALAKLPPGVNKSEAQSVLEQCKDKTGQDAADK  
AFEIFRCYYKGTTHILF-

>BmorOBP28

MLKVFIVTFFAFQLSAIARLQANGCVAVPFPKDKTIIIVEAMKSCIAKTGANPNFIDVIRSGK  
VSEDEKFKEFYCTCNDTGFVNPDGHIKVKECIELFPKETQPLVEPVIKNCCKEYVNVKYD  
TLFKFLKCFQETSPVRVALA-

>BmorOBP29

MTGPAAAALLLALLAAAGQATTGCKNCVILGKEERAMFRSHSDACLAQSRVEPRLLES  
MNGELIDDAALRKHVYCVLLSCKMIGKDGKLLKAAAILGKLAARPAGRDVTKVLEACAE  
QPGASPEDVAWNIFRCGYNRKAVLFDYMPAGGASSGNTENHP-

>BmorOBP30

MRSFVILLNYGLCCGQFMAEDYYYDIVTRDPDDLREKENEVRALRAFQADCAEDVQ  
VKPDLVVNLKSGDWQTEDVSLKKWALCVLMKLGMLTAQGVFKMNEAMSKIPDMNDKII  
AEKLIDDCLSLQATTPHDAAWNYIKCHHQKDPEGNFSSLNIF-

>BmorOBP31

MKTFIVFVVCVLAQALTDEQKENLKKHRADCLSETKADEQLVNKLKTGDFKTENEPLK  
KYALCMLIKSQLMTKDGKFKKDVAKVPNAEDKLVKVEKLIDACLANKGNSPHQTAWN  
YVKCYHEKDPKHALFL-

>BmorOBP32

MYSHKYLNDFTNIPEILILLSSVALMSYGYNTKLFSSHSLGSEPSLSILYARDKKSVDKVTNEC  
LMEYMPKNLYKYPLRIDRNDIPCIHCVLKKFGIISNDGFINIKNYRRVQAIHRYDPRILIS  
DVGETCAQNINGMNLDDHVDVCKKAKVFNDCTQLYAIYREPEDW-

>BmorOBP33

MYAHDKLSDMIADQCLNEMYPRSKRLEIEESDEPCIIFCVLKFKGIMSPTGVINLEAYRKR  
VQLPEQLAQRNSINDFGSACLESAEATQHKQDVCKKAKVFNECTHLYKILLK-

>BmorOBP34

MEKMILLNVFAVVLPCVLASRTRGSSGTLVDFTDPKVQGHLDALVRMAQSCVIKVRATPK  
DVRAYFTNSSPVSRSGQCFATCMLEQSDIINHGKVNDRDLLVHLAGLVNGKNSRVVRKLN  
VSRCLCLDSISGMTDRCLASTYNDCLNENMIEFAFLDIAEEAVRKMPFHLLIQPK-

>BmorOBP35

GMSTHVLDLDFKRNMTTECLKEVQNNDKRPIKRLSPKQESPIHGECLACVLKKNQVVIQNGKV  
NKDNLMALVSKFHAKETKLMKKLEKNLDRCLINISVKNHDECSLASQLNDCTNDIMASSK  
QKILFNY-

>BmorOBP36

MAVSEISRILFTLIVSFIYIVYSFKPLTKDEHIERYNKMNEDIEPFRKNLTECARQVKASMA  
DVEKFLKRIPQSNMEGKCFVACILKRNSLIKNNKLSQENLLEVNRAVYGDDSEVMSRLKT  
AILECSKIVEDIFEICEYASVFNDCMHMKMEHILDKITMERRMEALGQMSSNPDEWSEEE  
DEMLKLVKDEL-

>BmorOBP37

MFYPPFRFTLLFYGLFVIYLVRAEPEKENHFTLALKKTLFSTARSCMSHVNANETDLEYLRK  
DPPFPDKAACIIKCLLEKIGVVKNKYSKMGFLTAVSPLVFTNKKLDHYKSVSENCEKEI  
NHDQTTECELGNEVVSCIFKYAPELHFKT-

>BmorOBP38

MANLVLLLTFVLMTLSMARLKSTEAPKSKTALFNDQDNMGYEELDMEEIMSACNESFRIE  
YAYLESLNDSGSPDETDPKCYIRCVLEKTEILSENGVLNPATAALVFAGERNGKPMSD  
LEEMAVACADRHEKCKCEKAYNFVKCLMYMEIDKYEKKN-

>BmorOBP39

MVRKISALLCCFCVLGISMCDISAISTDNEQRCKNPPTAPQKIERVITLCQDEIKLSILREALD  
VIKEEHTMPAERKRNRKREVPFTHDEKRIAGCLLQCVYRKVKAVDGFQFPFTLEGLVGLYSD  
GVNERGYFMAVLEASRECLMKNHDKFSRTPMDNGRNCVDFDIFECISDRIGEYCGTSG  
L-

>BmorOBP40

MSEFIQPSWRTQCNFRLNWDNRNRLSIDISHGAATTQTPVPTTKPKALRDFMVVPQSCDK  
TTCVFKKLNIVSDKGVVDVKSFIKLLDKFTNSYPVWNSAKARVITTCRKSLLIAYDGGCEL  
NNILACTFDVLSENCPLNGNNQTC-

>BmorOBP41

MLTILFLLPIVVGVLSGNIPEQPRVYCGELPNTIYSLGNPKIIQPEVSEKCNKPISECDKTRC  
IFKESGWAKNNVIDKKKVSDFEYQFAKDNPDWSAAVQNFKTTCLSDSLKPGVDTNCPA  
YDIIHCALISIFIKFASPSQWSTSEQCVYPRQYAGACPVCPERCFAPSVPNGSCNAACLALLRT  
P-

>BmorOBP42

MMGYACVFVILAVLQAISAEDPPGLPPFLKDAPEKCKSPPRVKNPNECCISEPFFKEADFIE  
CGIEKPGSERGPPDCSKQNCLLKKYNLLKNDETDPDIEAIKSLLDKYIEKNPSFKSSVEKAKE  
CLREDLPGPPQICLANRMTLCIGTVLLMECPDEKWNTTDDCKAFKDHMTECQKYFPK-

>BmorOBP43

MKVCVLFAlFTVAQAAKATLKPISACCNIPELGNPEPLAECSPKLPGPCKDIQCVFEKSGF  
LTENKTLIKEAYKTHLRQWAKEHEGWSVAVEKAISDCVDKDLRQYLEFPCSAYDVFTCTG  
IAMLKKCPNEHWTC-

>BmorOBP44

MSRLVLFFTILVVLQEFIINLYFNFITEIDSCCVKKYPKLFDFSEFITECYNTQRKANDKCERD

MCVARKLNLTEEDSINKDALLRFVEEGFKTEIDLVNAIKKKCFEEDISNIGKPEMCEVAK  
YKICITSRMAEDCPKWDSKGICSSAQKVENFMKMLS-

>DpleGOBP1

MKKLTTGFVKAMEECKAELNLGDHIIQDFMNYWREEYELNLRDTGCAIMCMASKHDLIT  
EDMKIHHENAHEFAKSHGADDDLAKQLVQMIHDCEKQFTDITDDCSKTLEISKCFRTKIHE  
LKWAPSMETILEELMTET-

>DpleGOBP2

MAVRGLLLLSAVLAATSVTVDGTAEVMSHVTAHYGKSLEECRKETGLSKEILEEFKHFWS  
DDFEIVHRSPFTVRLPHLHDDARMHHINMNDYVKGFPEDVLADKLVQMIHKCEKEYD  
DIKDDCDRVVKAACFRADAKKEGIAPEVAMIEAVMEQY-

>DplePBP1

MARDILHIWEESYDLNHDETGCLVLCAMVRLELLDQQGNMIVENTEGFIRANGGDDSMV  
SFLIQLYSMCREKTSSISNGCKAAIELSKCFRAAIQQIGWVPDTSLLVISYD-

>DplePBP3

MNKSCVVFVAFALIFVNVQKVQSNEVMKGITSSFFKVLDECKRELGLTDNVLTDLYYFWKQ  
DHPLMHRDTGCAIVCMSQKLNLLDTIGKLHHGNAQEFAINHGAGEQMAKKLVTMVHEC  
EQQFMEQEDSCLRALDVAKCFRTAMHDVNWAPKFDIIVTEVLTEVK-

>DpleABP3

MPSLSLLLYLAMLTLCYGAKEKPELSEEIKEIIQHVNNECVGKTGVAEEDIANCENGIFKED  
MKLKCVMFCLLEEGSLVDDDGNDYDMMVSLIPDQYTDRLVNMINGCKHLDTDPKNC  
QRAFDVHKCSYSKDPDFYFLF-

>DpleABP4

MTRAQLKKTMTIMKNQCMPKHVNNNDKVGQIEQGVFIEDHDVMCYIACIYKTIQVVKN  
NRLDKDLISKQIDALYPPELKESTKEAVSKCIKEQAKYEDPCAGIFYACKCLYEDNPANFIF  
P-

>DpleABP5

MRVLVVAAVTLITLITLRCVPRTDKMQNNVKDLTSTTPNSMEEQMDKISNDLRPVMAECN  
ETFRIEMYYLETLNTTGSFPEELDRTPKCFRLRCVLEKAEVASADSQFDVSRADVFDQIRVL  
PHDDLVKMATTCSRAETCKCERAYQYLKCLMGMINKYDTT-

>DpleABPX

MAELAKMLRDNCLEETGADVALIDKVNQGATLMPDGKLCYIKCVMETAGMMSGGEV  
DVEAVVAVLPEELQRHADTMRACGTRGLDDCDTAFLTQACWQAGCPKDYILI-

>DpleABPfm18C17

MYLRLVALFFFTSYATANLASVITKCSDEDTKCLKDFTQNLIPLFAKGDPSMKVDPIDPIFV  
KTINASSPNLKLVLNDISLTGLKDCVVKKAKRDLQKNKFLFKLMCSVNLEGQYVMDGRL  
LILPINGKGRNHVSLDKALFVIETDVAENILEDGKKHWHIIPKWSYKYELKEKSNIIFENLFN  
GNEVLSKAAEEVIKDNNGNEIIQEVGEPIIEYIIGKVVDSDMRQFYTAVPVEELVQN-

>DmelObp8a

vpmrsspqsallrardqcgreltaaqrlqldrmqfedaaahrhlyhcfwsrlqlwldetgfaqrivqsfggerrlnveqalpaingcnak  
tsrsgsgaqtvdwcfrafvcvlatpvgeykrhmsdvingna-

>DmelObp19a

Gvteeqmwsagklmrdvclpkypkvsvevadnirngdipnskdtnyincilemmqaikkqflestlkqmdimlpdsykdeyr  
kginleckdstvglknappedpahallsclknkvfvfp-

>DmelObp19b

Deeegsmtvdevveliepfgdactpkpsrenivemvlnkedakhetkcrhcmleqfelmpedqlqynedktvdminmmfpdred  
dgrrivktcneelkaeqdkceaahgiamcmlremrsgfkipeike-

>DmelObp19c

Qtqafdlakllpktgtpiwavidrnlpqvqelvtarmeciqlqlprdqrpqgkvtvpsekekclvecvlkkiklmdadnklngvqve  
kltslvtqdnkmaiaivssmaqacsrgissknpcevahlfncisrqlernvklvw-

>DmelObp19d

Kpheeinrdhllelaneckaetgatedveqlmshdlperheakclracvmkklqimdesgklnkehaielkvmskhdaekedapa  
evvakceaietpedhcdaafayeeciyeqmrehgleleeh-

>DmelObp28a

Fdekealalimesaescmpevgatdadlqemvkkqpastyagkclracvmknigildangkldteaghekakqytgndpakkiald  
igetcaaitvpddhceaeygtcfrgeakkhgll-

>DmelObp44a

Sdyklrtaedlqsarkecaasskvtealiakytfdypddditrnyiqcifvkdllfdeakgfkvenlvaqlgqgedkaalkadiekcad  
kneqkspanewafrgfkflgknlplvqaavqkn-

>DmelObp46a

Rstppaladedcelnsvdtmhdfccdlhdespqfsdcqmewhekipyetdeeeqymfctaecsfnstnflgrdrslnlnvekehlesdl  
vndadikllydytvkcdkhalslmpkqvkqskrlsrlgchpypglvecvanemilhcptkrfrqtaqceetrnhlkqcmqylkyks-

>DmelObp47b

Qatidcqrppqlvdpalckdggdrdqvaeqcaqrlgtangqkagppsltaaclaeciltskyidepqklnlanirsdlsakfsndtly  
vetmtmafkscepqsrrlamimqqqqvqqqktqqqprcspfsaivlgctymeyfknpcdhrwtpnaqctlakayvtqcglga-

>DmelObp49a

Dvdcskrpfsvnpkccpmpdfvtaelkqkcikfdmtpppppdgeasgsfeskrhhphpppcffscifnetgiyqnrkldeaklna  
ylqevfedssdlqtatqaftkatkvadfeanlpprpapspppgfpmcphdaghlmgcvfrnmknpcpsirndsqqctdmkefftk  
ckpprgpppsaedm-

>DmelObp50a

Akraapksvqnvhvccsaplpnwgvfnrechksaiqasvsinrisksvnlanflikcrldcdfnassvlqgnrliqakvrpmlerafs  
neptidayesnfakestvvrskyqelsplrsqdacdrhalfyslcayarliftcpdkmwqrnnrmcqeakayakkcpwpalkmfmrn  
t-

>DmelObp50b

Vsndmgglqkctellnthklvyccgksfldkfpvgsnctpfwddygp cryeclyrhwdlldqdnkikkpelylmitlslsplsngydk  
ygaafkaahetcealgsrhadfllysnqvadkmgmasstclpyamlhaqctmvyltancprenwiddpkcnslqkllssctkkldekt  
nalkgkdeeldngcghidsegsnllmacfltlmiakfisdh-

>DmelObp50c

Dpidvdctrqdfnivkdccvyptfrfdqfsqcgympvgaprispclyecifnktntvvdgaihpdnarlmllekflgnqdfeeayfn  
glmgcsdsvqemisnrspqrkteqcspsflfygicaryvfnhpcsswsgetescemarlnmncskpsrgsshrl-

>DmelObp50d

Adpicsqrpdvtalrncklpnldfssfnksqylvngvhispcsfecifraanalngthlvmeniekmmtlgsdefvhvylgdfrsc  
gnqekvlikamkrrrvpitgkcgsmaimyglcahryvyrncpesvwsksatcneareysircddm-

>DmelObp50e

Sfnscappnfnfdintccrtpeldmgdvpqkchkyvsglksanskypsyahlcypdcyretgamvngkikvnrkvqyleehvhr  
dqeivshivqsfesclsnvkgmhkslniesykvlpghgcsfpagiiyscvnaetflncpqqmwknekpcnlakqfaeqcnplphvplps  
s-

>DmelObp51a

Lfeseanecakkgitpdyfenfphssrvkcfyhqcmekleiiangvvtpdfdkvlnispesydkygvkvpclklshrdkcelgylvfq

clkrefnl-

>DmelObp56a

Sslnsdeqkdlakqhreqcaeevklteekakvnakdfnnpnenikcfancffekvgtlkdgelqesvvlklgaligeektkaalekrt  
ikgenkcdtasklydcfesfkpapeaka-

>DmelObp56e

Vgltdsqkaeakqrakacvkqegitkeqaiarlsgnfadsdpkvcfancfleqtglvangqikpdvvlaklgiageanvkevqakcd  
stkgadkcdtsyllykcyenhaqf-

>DmelObp56f

Mkssekikaclkrqlgytitentkfdakedslqskcfyhcllevkgviandaisseqprkvlekkygitdtddelekaeekchsikasgkcel  
gyeilkyqsitkh-

>DmelObp56g

Qqanidssvskelvtcdlkengvtpqdladlqsgkvkaedakdnvkcssqeilvksqfmdstgklltdkiksyyansnfkdviekdldr  
csavkganacdtafkilsfqaan-

>DmelObp56h

Npdfrqimqqcmetnqvteadlkefmasgmqsakenlkcytklmeqghltnqgfnaqamldtlknvpqikdkmdeissgvna  
ckdikgtndcdtafkvtmclkehkaipghh-

>DmelObp56i

Gpikdqmaaagitaqdvandhetddpghsvkcfrrflenigiadnqiipgafdrvlghivtaeavermeatcnmiksetshdescef  
awqisecyegvrlsdvkkqqrtrnhrg-

>DmelObp57a

Iqslsleetnyvsdclasnnsiaefqelidrnsseddldndrykcfihlaekgnlldtngyldvdkidqiepvdelreilydckkiyd  
eedhceyafkmvtcltesfeqsdevteagkntnkln-

>DmelObp57d

Ntsvfnpcvsqnelseyeahqvmenwvppidraykcfllcvlldglidernvqidkymksgvvdwqwvaelvtriesderdl  
celsygifncfkdvklaekyvsisnak-

>DmelObp57e

Ndpchngqidediaesilgdwpanvdltsvkrshkcyvtcilqyynivtasgeifldkyydtgvidelavapkinrcryefrmetdycs  
rifafnclrqeilts-

>DmelObp58a

Lkcrsqeglseaelkrtvrcmhrqdededrgggqgrqngyeygygmdhdqeeqdrnpnggygnrrqgrlrsdgrnhtsnd  
ggqcvaqcfemnmvdngmpdrkvsylltkdlrdrelrnfftdtvqqcfrylesngrgrhhkcsaarelvkcmsyakaqcedwe  
ehgnmlfn-

>DmelObp58b

Vrvhrhmeriheenihecckhqdgddvtescakqtnfrlpsneeaidvtdqamvgtcwakcvfdhynlmenntldmdkvr  
syykryhqdpeyatelnayekchtqseeatekflslpivrafstakfckptssiimscviynffhncpasrwsnttecvetlafarkcd  
vltt-

>DmelObp58c

Ikidcentainedhihyckhpdghndliegcarentflpnqneealvditadraigtcfgkcvfsklnlmdkdnldmdavrsiflterf  
pddpeyakeminafdhchkgseentsmflskplfkqmskqfcdpkssvvlacvirqffhncpadrwsktkecedtlafskkcdslatl  
-

-

>DmelObp58d

Qdneettavaissgdltedkentsragccselyigeedlvkcfvihspklpvdgdadigktlrlfscfveclykqkkyigksdtinmkmv  
kldaektvdrpkekdyhiamfefcrkdavgvynllkaspgakvllkgacrpymvmfmcisdyhqkhecpyfrwegtakagtkdmc  
enakaecyqidgitlptkspa-

>DmelObp69a

Veintiikqvrklrmrcnqtgasvdvidksvknrlptdpeikcflycmfdmfglidsqnmhleallelveeiyktinglvsscgtqk  
gkdgcdtayetvkcyiavngkfiweeiiivllg-

>DmelObp76a

Mtmeqfltsldmirsgcapkfkktedldrlrvgdfnfppsqdlmcytkcvslmagtvnkkgefnapkalaqlphlvppemmersrk  
sveacrdthkqfkescervyqtakcfsenadgqfmwp-

>DmelObp83a

Qrdenypppgilkmakpfdhacvektgvteaakefsdgeihedeklkycmncffheievddngdvhlekfatvplsmrdklme  
mskgcvhpegdtlchkawwfhhqcwkkadpkhyflp-

>DmelObp83b

Qeprrdgewpppailkglkhfhdicapktgvdeakefsdqihedealkcymncflhefevddngdvhmekvlnaipgeklrni  
mmeaskgcihpegdtlchkawwfhhqcwkkadvhyflv-

>DmelObp84a

Lqdhakngdifiniydsfdgdvddisttsapreadyvdfdevnrncnasfitsmtnlvqfnntgdlpddkdkvtsmcyfhcfeeksgl  
mtdyklntdlvrkyvwpagdsveaceagkdetnacmrgyaivkcvfraltdarnkptv-

>DmelObp85a

Mspgsvvsmfltrpsldkgnseckslnlpahrkfnfaelytinmcieecnficgyieidppfrldanirnlqtiappqnesipflvd  
ayrkcelfrsshgrfthlpdieiepcnfpalqiticvrihamqkcpsefyvdsdeclareyftqcvgdietnla-

>DmelObp93a

Cdvqkndkainscrksllgnstnsngevrnlksdkvalhaciaecsfrtngflsngtvntqalqksyqrykndpnmsqlmlkslnc  
tdyarkrvqefqwpmpkkgdcdfypatllacvmekvynecptskwkntsdctamwkylvacddvasnkkk-

>DmelObp99a

Dyvvnkrhdmlayrdecvkelavpdlvekyqkweypndaktqcyikevftkwglfdvqsgfnvenihqqvlgnhadhneafhas  
laacvdkneqgsnacewayrgatllkenlaqiqkslapka-

>DmelObp99b

Ddwtpktgeeirvirvdelkenplsndqisqlknlifpnepdvrqyltcsaiklgifcdqqgyhadrlakqfkmldseealqiaqscvdd  
naqknptdvafghqcmmaskigdkvrafvkakaeakkkaa-

>DmelObp99c

Asvwlkptaqmvyedlecrqesqeedaatrlclvkkglwtdesgynarriakifaghnqmeelmlvvehcnrmeqdtshlddwaf  
layrcatsgqfghwvkdmsqkever-

>DmelObp99d

Dhhhhhhdyvkvthdltnyrtqcvkevvhaseelvekykkwqypddavthcylecifqkfgfydtehgfvdhkihiqlagpgeve  
sdevhqkiahcaethskegdsckayhagmcfmnsnlqlvqhsvkv-

>DmelObp73a

VEYLIRFETKKAKCLNPPRTARKVESVIRECQDEVNRNKLVNEAYEILKEQVSQNQPPIDPN  
DDSIDFIWPSVPEAPSLDHSPNISQYIYVYDEPEPQRHVARLMRNIRRLDVASSGIYHPTLV  
PLEDKRIAGCLLHCYAKNNAIDQRGWPTLDGLVHFYSEG VHEHGFFMATLRSVNLCLRT  
MTARYGVNRKELPKKGESCDLAFDVC SHMNTNIFKDLQFWAPFISYVNESRAINYL-

>HarmPBP1

MEFHRSTMMSVRLALVVAAWLFIRVDASQDVIKNSMNFAPLEDCCKEMDLPDSVTTD  
FYNFWKEGYEFTNRQTGCAILCLSSKLELLDQELKLHHGKAQEFAKKHGADDAMAKQL  
VDLIHGCAQSTPDVADDPCMKTLNVAKCFKAKIHELNWAPSMELVVGEVLAEV-

>HarmPBP2

MADSRWLFARVFCVLMMGSAMSSKELLTKMTGGFTKVVDACKTELSVGDHIMQDMY

NFWREEYQLVNRDLGCMIMCMTAKLDLIGDDQKMHHGKAEEFAKSHGADEALAKQLV  
GLIHGCETQHQAIEDHCSRALeiaKCFRTKIHELKWAPSMEVIMEEIMTAA-

>HarmPBP3

MGSRHVFFALVVLAVSVRKAEPSKDAMQYITSGFVKVLEECKHELDLNEQILADLFHFWK  
LEYSLLGRDTGCAIICMSKKLDLLDANGRMHHGNAAEFAKKHGAGDEVASKIVTIIHECE  
KKHEQDGDECLRVLEVAKCFRTGIHELDWQPKVEVIVSEVLTEI-

>HarmGOBP1

LLADINVMKDVTLGFGQALDKCREESQLTEEKMEEFFHFWRDDFKFEHRELGCAIQCMS  
RHFNLLTDSSRMLHDNAEKFIQSFPNGEVLARQMVELIHSCEKQFDHEDDHCWRILHVAE  
CFKGSCVQRGIAPSMELMMTELIMEAESR-

>HarmGOBP2

MTSKSCLLLVAMATLTGSVIGTAEVMSHVTAHFGKALEECREESGLSAEVLEEFQHFVRE  
DFEVVHRELGCAIICMSNKFSLQDDSRMHVNMHDYVKSFPNGHVLSEKLVELIHNC  
KKYDTMTDDCDRVVKVAACFKVDAKAAGIAPEVAMIEAVMEKY-

>HarmOBP1

MSKFTFFVLCVAVSLSKVYASDEDKAKLHEALKPLVEECMKDHEVSLDDLKAAKEAKS  
ADGVKPCFLACVYKKAEVLNDKGEFDADHALEKLKEFVSDDEVLAQVAEVGNTCKAVN  
DKAVSDGDAGCERAALLTACFLEHKAEILV-

>HarmOBP2

MMDRKRLLIIFLAQGS DAMSRQQLKNSGKMLKKNMKNQVTEQIGSIDKGF  
VEDKKVMCYIACIFEMTNVVKNNKLNVDASIKQIDLMYPPDLKESAKAAVEKCKDVQKK  
YKDICEASYWTAKCMYDFKPEDFIFA-

>HarmOBP3

MSKFTCFVLCVLAVSLGEVRSNALEKAAIRA AVYPLIVDCAKEHGV TLEQLKAAKASHSA  
EGINPCFQSCVYKKTGIFNDNGEYDVANAKTKLQKFV TDEDEYARIAEVGKTCASVNDKS  
VSDGAAGCERAALLTACFLEHRAQIII-

>HarmOBP4

MSKLTVCVFAAVVFSNVNADDETRASFRQVLGPLVMECRNEFGITEDDLKKAQQERSP  
DALKPCFIACVFKKFGIITSAGKYDSDASISRIKDVVKNDLLAKLKS VGEKCNVNDASV  
SDGDAGCERAALLAKCFIENKSELSI-

>HarmOBP5

MSKFTCLVLCVVAASLSQAYASEEEKAAFREAIKPIVEECSKEHGVSHDELKSAKDNQNA  
DSIKPCFLGCVYKKAEVFNSKGEYDVKALEKLLKFFVSNDEAYAKFAEVGKKCASVNDK  
AVSDGDAGCERGALLTACFLEHKAEVPL-

>HarmOBP6

MSKFTCLLLCVAVSLSKVHATEEEKEAIRAAVRPIMQECGKEHGVTLDDLKAAKAAHSA  
DGIKPCFQSCVYKKGAGIFNDNGEYDIANA KTKLQKFVTNDEEYARIAEVGKMCASVNDK  
PVTDGAAGCDRAALLTACFLEHRAQIII-

>HarmOBP7

MFRFGVLSFVLLFCMESSYALSSEEELSIKEALHPFVVECAEEYGMTEEMFEEAKKKG  
AEDIDPCFMSCFLKKTGFFDDSGKFD A EKSSIFAKEHITSESAIKFLEAGAGECVKINDEDV  
SDGENGCDRAKLLFDCLTELKKKMSE-

>HarmOBP8

MLLIEIVKFLTLVAMCEAMTMKQIRNTGKMMRKSQPKNNVADEQIDPIAEGVFNEDKEV



KCYMACIMKMANTIKNGKLNYEAAIKQADLLLPDDIKEPAKEAITACRKVADAYKDICDA  
SFHITKCIYTQNP GIFYFP-

>HarmOBP9

MCKFVFLFLYSAVMAVNIWSASCISEEDKAAIITAIAPLAQNCGSEGLDNDDFEKYKEDG  
SDMDPCFKACLMTQMGVLDKEGKYDGKGLHKAMEEADYPGDKDDAQKFLDELDRCFD  
AKGDNSGSDEEAKMKRADVLFRCMQDMKEK-

>HarmOBP13

MFTGTLPVFLATFAYGGKEKPVFSDEIKEIITQVHDECVAKTGVAEEDITNCENGIFKED  
PKLKCYMFCLMEEASLVDDDDAVDYDMLVSLIPEEYVDRTTKMIFSKHLDTPDKDKCQ  
RAFEVHKCSYEKDPDLYFLF-

>HarmOBP16

MFKSIVFCALIIVASHADV LKKRDSKGASLKPLSVCCDIPELGD PKNLEKCSNP KMPGPCD  
DIQCIFEASGFLDRNTLNADAYKNHLMKWQEEHKPWKVAVDRAIEECANNQTRQYLDFF  
CKAYDVFTCTGIAMLKKCPEAAWKC-

>HarmOBP17

MKTFVILAA CVMLVQASGLTDEQKEK LKKHRSECLTETKVDEQLVNKLKGGDYKTESEP  
LKKYALCMMMSELMTKDGKFKK DVALAKVPNAADKPTVEKLIDACLANKGNTPHQT  
AWNYYVKCYHEKDPKHAIFL-

>HarmOBP18

MKSFVFCVFLVAGAFANVSLPPKQNEKANQIATECMKESGLKPEVLAEAKKGHISDDEH  
LKKFTFCFFKKAGIVSE DGKLNTEVALAKLPPGVDKAEAEK LLETCKGKTGKDVTDTVFE  
IFKCYHHGTKTHILLGF-

>HarmOBP19

MEQCIGIKRASGEGSEELEKI QPGPKVPCKEGICLMQKANLLQENNSVDYTKLRSFLDQWA  
DTNAEFTDAILTAKKICAQDGGPAGPPVCEQDRIFFCLTSNILWNCNLRKLDGCDILQEHM  
DECRQYYVQDEPEE-

>HassGOBP2

MTSKSCLLLVAMATLTASVMGTAEVMSHVTAHFGKALEECREESGLSAEVLEEFQHFWR  
DFEVVHRELGC AII CMSNKFSLQDDSRMHVNMHDYIKSFPNGHVLSEKLVELIHNCEK  
KYDTMTDDCDRVV KVAACFKVDAKAAGIAPEVAMIEAVMEKY-

>HassGOBP1

MDINVMKDVTLGFGQALDKCREESQLTEEKMEEFFHFWSDDFKFEYRELGC AII CMSRH  
FNLLTDSRMHHDNTEKFIQSFNGEVLARQMVELIHSCEKQFDHEDDHCWRILHVAECF  
KGSCVQRGIAPSMELMMAEFIMEAESL-

>HassPBP2

MMGSAMSSKELLTKMSEGFTKVVDACKTQLNVGDHITQDMYNFWREEYQLVNRDLGC  
MIMCMVAKLDLIGDDQKMHHGKAEEFAKSHGADDVLAKQLVSLIHSCEQHQAIEDHCS  
RVLEIAKCFRTKIHELKWAPSMEVVMEEIMTAA-

>HassPBP3

MGSRHVFFAFVAVLAVSVRKAEPSKDAMQYITSGFVKVLEECKHELNLNEQILADLFHFWK  
LEYSLLGRDTGCAIICMSKLLDLLDANGRMHHGNAAEFAKKHGAGDEVASKIVTIIHECE  
KKHEQDGDDECLRVLEVAKCFRTGIHELDWQPKVEVIVSEVLTEI-

>HassPBP1

MNFAKPLEDCCKEMDLPDSVTTDFYNFWKEGYEFTNRQTGCAILCLSSKLELLDQEMKL

HHGKAQEFAKKHGADDAMAKQLVDLIHGCSRSTPDVTDDPCMKALNVAKCFKAKIHEL  
NWAPSMDLVVGEVLAEV-

>HassOBP11

FCVLVAGAFANVSLPPKHNEKANQIATECMKESGLKPEVLAEAKKGGHISDDEHLKKFTF  
CFFKKAGIVSEDGKLNTEVALAKLPPGVDKAEAEKLETCCKGKTGKDATDTVFEIFKCYH  
HGTKT-

>HassOBP19

MIRSCFVLVAVLQVLGVSAQEGPGGPPGDPRQHPILSKIPRKCWAPPPGIDIYRCCPIPKLYP  
DEIMEQCGIKRASGDPSEEPEKPQPGPKVPCKEGICLMQANLLQQNNSVDYTKLRNFLD  
QWADTNAEFTDAILAAKKICAQDGGPAGPPVCEQDRIFFCLTSNILWNCNLRKLDGCDILQ  
EHMDECRQYYVQDEPEE-

>HassOBP17

MKTFVILAAACVMLVQASGLTDEQKEKLLKHRSECLTETKVDEQLVNKLKGGDYKTESEP  
LRKYALCMMMSELMTKDGKFKKDVAKVPNAADKPTVEKLIDACLANKGNTPHQTA  
WNYVKCYHEKDPKHAIFL-

>HassOBP16

MFKSIVFCALVIVASHADVLLKRDSEKASLPLSVCCDIPELGDPKNLEKCSNPMPGPCD  
DIQCISEASGFLDRNTLNDAYKAHLTKWEEHKSXKVAVDRAIEECANNQTRQYLDFF  
CKAYDVFTCTGIAMLKKCPEAAWKC-

>HassOBP13

MFTGTLPLVFLATFAYGGKEKPVFSDEIKEIIVTVHDECVAKTGVAEEDITNCENGIFKED  
PKLKYMFCLMEEASLVDDDDAVDYDMLVSLIPEEYVDRTTKMIFSCKHLDTPEKDRCQ  
RAFEVHKCSYEKDPDLYFLF-

>HassOBP9

MCKFSVFLYSAVMAVNIWSASCISEEDKAAITAIAPLAQNCGSEGLDNDDFEKYKEDG  
SDMDPCFKACLMTQMGVLDKEGKYDGKGLHKAMEEADYPGDKDDAQKFLDELDRCFD  
AKGDNSGSDEEAKMKRADVLFQCMQDMKEK-

>HassOBP3

MSKFTCFVLCVLAVSLAEVRSNALEKAAIRAALYPLIVDCAKEHSVTLEQLKAAKAAHSA  
QGINPCFQSCVYKKTGFINDNGEYDIANAKTQLQKFVTEDEYARIAEVBGKTCASVNDKS  
VSDGAAGCERAALLTACFLEHRAQIII-

>HassOBP7

MSRFCVLSFVLLFCMENIYALSSEEELSIKEALHPFVVECAEEYGMTEEMFEEAKKKGSA  
EDIDPCFMSFCFLKKTGFFDDAGKFDAEKSISFAKEHITSESAIKFLVAGAGECVQINDEDVS  
DGDKGCDRAKLLFDCLTDLKKKLSE-

>HassOBP-8

NTGKMMRKSCQPKNNVADEQIDPIAEGVFNEDKEVKCYMACIMKMANTIKNGKLNIEA  
AIKQADLLLPDDIKEPAKEAITACRQVADAYKDICDASFHITKCIYTQNPATIFYFP-

>HassOBP-7

MCKLTCLVLAAVAVVFSNVNADDEPRASFRQMLGPFVMECKKEFDITEDDLKKAQQEHS  
PDALKPCFIACVFKFGIITSAGKYDSASISRIKDVVKNDDLFAKLKSVTEKCNVNDAS  
VSDDDAGCERAALLAKCFIENKSEISFN-

>HassOBP-6

MSRQQLKNSGKMLKKNCMSKNQVTEQIGSIEKGFVEDKKVMCYIACIFEMTNVIKNN

KLNYDASIKQIDLMYPPDLKESAKAAAEKCKDVQKKYKDICEASYWTAKCLYDFKPEDFI  
FA-

>HassOBP-5

MLNLFIVVLALCSSLVAVYALTEEELKLKFTKLIMKCNKDSEVDMQELVQLQSYVVPTKTAT  
KCVLACAYKAASVMNAQGLYDIDHAYKVAEMMKNNGDEKRLTNAKKMTDICVKVNDIK  
VSDGEKGCRAALIFKCTVDNAPKFGFKL-

>HassOBP-4

MFKLFVFLAFTVATCYGAQQGQVLCGPLPRRLTRCLNMAPAISGEIQDKCHESRTATECER  
LTCIFREYNLLDGTTVNKDRTNFLDNYVKQYPVWTTAVQHAKAACLGDELKPKQGIDL  
NCPYDTLQCIFSSLIKHATPSQWSTTSECQGYRAFAAACPICPEDCFAAQVPIGSCNACL  
SLP-

>HassOBP-3

HAGDEDKAKLHEALKPLVEECMKEHEVSLDDLKAAKEAQSADGVKPCFLACVYKKA  
EV LNSKGEFDADHALDKLKEFVSDDEVLAKVAEVGNTCKAVNDKAVGDGDAGCERA  
ALLTACFLEHKA  
EVKPIRPLLPWAHHHRH-

>HassOBP-2

MSKFSLVLCVVAASLSQAYASEEEKAAFREAIKPIVEECSKEHGVSHDELKSAKDNQNA  
DNIKPCFLGCVYKKA  
EVFNSKGEYDVKALEKLKFFVSNDEAYAKFAEVGKKCASVND  
KAVSDGDAGCER  
GALLTACFLEHKA  
EVPL-

>HassOBP-1

MSKFTCLLLCVVAVSLSKVHATEEEKEAIRAAVRPIMEACGKEHGVTLDDLKAAKAAHSA  
DGIKPCFQSCVYK  
KAGIFNDNGEYDIANA  
KTKLQKFVTNDEEYARIAAVGKTCASVNDKP  
VTDGAAGCDRA  
ALLTACFLEHRAEIII-

>MSexGOBP1

MGQDTRSLVLVVLVGLVGAVSADVQVMKDVTLGFGQALEQCREESQLTEEKMEEFFHFW  
REDFKFEHRELGCALQCMSRHFNLLTSSRMHHENTDKFIKSFNGAVLSKTMVELIHC  
ELQHDAEEDHCWRILRVAECFKISCTKAGIAPSMEVMMAEFIMELKQ-

>MSexGOBP2

MVNRLILVVVVFITDSVMGTAEVMSHVTAHFGKALEECREESGLPVEVMDEFKHF  
WREDFEVVHRELGC  
AIIICMSNKFELLQDDTR  
IHHVNMHDYIKSFPNGQV  
LSEKMVQLIH  
NCEKQYDDIADDCDRV  
VKVAACFKKDAKKEGIAPEVAMIEAVIEKY-

>MSexPBP1

MKVAVVAIVVYLAVGNVDSSPEVMKNLCLNFGKALDECKAEMNLSDSIKDDFANFW  
VEGYEVSNRDTGCAILCLSKKLD  
MIDPDGKLHHGNAMEFAK  
KHGADEAMAKQLLDIIH  
NCENSTPPNDDACLKTL  
DIAKCFKKEIHKLNWAPNMDL  
VVGEVLA  
EV-

>MSexPBP2

MVSTKWRLLVVTIAVLTMEMVSASQEV  
LKQMSVGF  
SKVLQTC  
KTELSVGDHIIQDFYNY  
WREDYDLLNRDFGCMVICMAV  
KHD  
LINDQ  
LTMHHGNAHAFKTHGADDDTAQQLV  
TILRECEAKHQSVEDVCNRALEMAKCFRT  
KIH  
ELKWAPAMEVVLEEIMTSV-

>MSexPBP3

MAIPIFTVLLMMTAVKEIAPSSDAMRHIANGFLKVL  
DQCKHELGLTDQIVVDLYQFWKLQ  
YALLNRDTGCAIICMSK  
KLDLLDSTGRMH  
HGNTQEFVSHGATDEVASKVVV  
IIRDCEKQ  
QEGEQDDCVRVLEVA  
KCFRTAIHEL  
NWAPNMEVVVDELLTEI-

>MSexABP1

MSVISFFVLCFGVLAVSVGAVSENERNQISQSILPHIVKCSQEYGVSEGOIKDAKESVNPLG  
LNPCFLGCVLKSAGIIDKNGLFDVEATKEKSKKYISSEKDVTFNFDKIIKDCTEVNQKNVSD  
GNKGC DRAKELVTCFLAKRGDFS VFTF-

>MSexABP2

MDRKDLCLLIIAFILADGVDSMSKQQLKNSGKMFKKQCMGKNKVTETEIGEIDKGRFVE  
QQNVMCYIACIYQMSQVVKNNKLNYEASLKQIDIMYPPELKDTAKGALEACKDIAKKNK  
DLCEASFKTAKCMYEYSPKDFLFP-

>MSexABP3

MITATLHVVFALLGFVYGAKNKPVFSEEIKEIQT VHDEC VGKTGVSEEDIANCENGIFKED  
VKLKC YMFCLLEVAGLADEDGTVDYDMLVSLIPEEYSERASKMIFACNHLDTPEKDKCQ  
RSFDVHKCTYEK DPEFYFLF-

>MSexABP5

MCKPMYYV VFSIVYLSIVLAQKADNGNTKIANVQRNDQGSMDDDV DVEDIMNQCNETFKI  
EMAYLQALNESGSFPDET DKTPKCFLLCVLDNTGVMTKDGD FPERTAALFAGERAGKV  
MDGIQDMAAACADRKEKCKCEKSYNYLKCLMTMEIEKYANNN-

>MSexABP6

MKVTNGLFLVFLVSVLACGIAASP KKIYRIPPQASEKIVEEV LKCVQKMGLDSTVVNLLKE  
GKYTEDDRVIETLMCSNQN VGNVNGDGKVNIDKVMNDIFS NKPEIRSALVACEKDGGKSP  
LET FKNFILCFKEKVPVKVML-

>MSexABP7

MQACLFLTLV LAVVGLNAHNVHLTDGQKEKANEP IAA CIKETGIKPEVIAEAKKGHYSED  
EAMKKFILCFFHKAGIVNADGKLNLDVAIAKLPPGV DKTEATKTLEGCKDNGGKDAADP  
AFAIFKCYKDATKTHVLF-

>MSexABP8

MKALLVLAACL VLAQALTDEQKEKLKHKSECLSETKVEEQLV NKLKAGDYKAENDNL  
KKYALCMMM KSELMTKEGKFKKDV ALSKVPNPADKPMVEKLIDTCLANKGNTPHQTAW  
NYVKCYHEKDPKHAIFL-

>MSexABPX

MISSLVHVL TLLAVGALALDEEQAELARMVRENCVHEIGVDEGLLAKVDDGADLMPDPK  
LKCYLKCTMEMAGMISDGVVDVEAVLGLLPDDV KLR TTDIVRACDTQKGADDCDTAFLT  
QTCWQQANRADYIFI-

>MS|comp141270\_c0

MTMWFRALAMLVAGLAAAQAIEMDEDMAELARMVRESCAAETGADVALVEQVNAGA  
DLMPDAKLAC YMKCTMETAGMMSDGEVDIEAVLALLPPELAAHKAPSLRACGTVHGAD  
HCDTAWKTQKCWQAANKADYFLI-

>MS|comp141612\_c0

MKLFVVL CIVLVTEIYAAYVPLPSNHTDSNLEECRKTSEFTDETLNKMKTNP FVEDGGEIF  
KKFIKCYLEKTGAITDDGKLN VDEAVPKLGNFAKKIFEHCKTHVEKVGEEFVVVPTTTAS  
DYSECFRQGVSNYIWN AKQEGFEPFTYEWQK-

>MS|comp153447\_c0

MFGFGFLSLAAVLLCLGSTSALTPEEESLKEALHPFVLECADEYGIPEEK FEEAKAKGSA  
DDIDPCFISCF LKKAEFFDGDGKLDVEKTNEFVKAHLTSEHVIKFFEAVGGECAKVND EEV  
TDGDKGCDRAKLLFD CIQELKSKIGD-

>MS|comp108141\_c0

MFKFTGLLYCAVAVSLSGVVRAGEEDAEAFREAIKPFITECAKEHGISWEDIAKAKETHTV  
SSLKPCFVGCIFKKFEIINDKGEYDLEANLDKIKIFVKNEDLLTQLRDIMKKCVSVNDESVS  
DGNAGCERAMLLANC-

>MS|comp116343\_c0

MSKFTCLVLCVVAASISRAYASEEDKAAFRAAIQPIVDECSKEHGVSSDDIESAKTAGSAD  
NIKPCFLGCVLKKAEILNAKGEYDSKALTKLKKFVPEDETKYAKYAEIGKKCESVNEKAV  
SDGEAGCERGALLTACFLENRADIL-

>MS|comp129850\_c0

MYKFTCFVFIYILYAVFTQAESDSSDSSSDEVFEKLSHECMEKFGVTEDDLNGVIKTSVDTN  
IDSCYWGCYFTKMGVLNDKGQFDMNNFQTTMKKLMKDDDEDYDNLEKLVKKCEPVKDE  
TVADGEAGCERGTLFAVCFVKNDDGDFI-

>MS|comp162075\_c0

MVLHRSATMSVRLALVVIASLLIAVECSQEIMKNLAINFAKPLEDCRKEMDLPDSVLTDFN  
NFWKEGYEFTNRQTGCAILCLSSKLELLDPEMKLHHGRAQEFAQKHGADEAMAKQLVD  
MLHSCMQTTPDDANDPCLKTLKVVTFCFKTIHELKWAPSMDLIVGEVLAEV-

>MS|comp163093\_c1

MFHGGIWTKLQGFYKWYVLGLVSIGYILGELGHYLIGTTSKVTAEDLHYGDKSCMLNLS  
HVSLSDLPVVCEKVNSSDICATLTLNGTRYCEWGYNGLGIDYQVLGPAFMAVFTVVGVI  
LGVVADKYNRARILSFCTLIFVAILIMGSVKEYWHLVLRMIMAAGESGCNPLATGILTDL  
FPEKQRALALSIFNWGIYGGYGIAPVGRYIPDVNAWGLSWRVCYYGAGIVGLVITLLTFL  
TLREPSRTTIGEEGTGNKAGDSTLESGBKMPQVTIWHVIAQPRIILLCLAASIRHCGGMCFA  
YNADLYYRDYFPDVDLGGWWLFAVTVGIGSVGVVAGGIISKYVEKMGVRSRVLVLSQ  
LIATLPAFGSVVFGPLWAMITLAISYFFAEMWFGIVFAILVEIVPLSVRSTTVGVFLFVMNNV  
GGNLPILVDPVSKIIGYREAIMIFYAGFYGISSIMFFLTMFLMDGPVDKPAATPEEPKRTGLD  
NRAFTQDELPTRNAGRSLPTAPSERL-

>MS|comp124490\_c0

VRLALVVAAWLFIRVDASQDVIKNLSMNFAPKPLEDCCKEMDLPDSVTTDFYNFWKEGYE  
FTNRQTGCAILCL-

>MS|comp158322\_c0

HELKWAPSMEVVMEEIMTAA-

>MS|comp114857\_c0

MTPTTLVLALGLAAALADVNMKDVTLGFGQALDKCRQESDLTEEKMEEFFHFWRDDF  
KFEHRELGCA-

>MS|comp118070\_c0

MIFRFLSFYLIIEFYGAQARTDQEIKAWFFQEGMECNKEHSISPKEILMLKENKIPDTENAK  
CFVACIFKKTGMLDSKGMFDAASVAMTEKDFADDPQKQENSCKLLESCKKVNYEAVTD  
GEGCERSVLLHKCFVETAPQLGIKLP-

>MS|comp121812\_c0

MDAQKLGIQRELVTVGIQCIKDHPLSLSDIRAFRNKMIPNGNDPKCFVACLKIGVMDN  
MGMISPAKAKENAKKVFKGSEEHLKNVDEI-

>MS|comp131182\_c0

ENTFLQLPFALMQVSMDCFAGQRVMDASVMFECVYDCKWENFDKANMRLVLVMLQN  
AQKTMTLSAGGVKTLFSFALSVMFRGIYSAYTTLRRTMK-

>MS|comp133839\_c0

VTLPPIQNEKADNYAYACIEESGVTTEALKESRKGFFDDEGLKKFTHCFFQKADIVTCDG  
QLNIDVALAKLPVGVDKVLAKEILEGCKTKTGKSDTKVYEMFKCYFSQTPVHIKLSFDIE  
KKTVSA-

>MS|comp133858\_c0

QIHEDEALKCYMNCLFHEIDVVDDNGDVHLETLFNTVPGTVRNQLINMAKECEHPEGDT  
LCHKAWWFHQCWKKADPVHYFLP-

>MS|comp141404\_c0

MNTSNFQSIFCILCIVGLFFSYSHAMTRQQLKNSGKLMKKSCMPKNDVTEEEVGDIEK GK  
FIENRNVMCYVACIYTMTQVVKNKLSYEAVIKQVDIMFPAEMRDAVKAAATFCKDTTK  
KYKDLCEASYWTAKCMYD-

>MS|comp141702\_c0

MSKFSCLAFCVVVSLNSVLAEDGPANEGDVLDIVFECAKENEVKASEILAVMTSRDVTL  
VNPCLWSCCLKKGFFIDDKGQYVLPGLQYVKNIVKSDQFYTFIEKSAKQCESVKDKAG  
SECELGALLAACILEQMMKM-

>MS|comp142589\_c0

MLKSSVFLCCLFCALTPYLALAMTDEQKAQIHQHFETIGKACNTGNSVITADDITNLRAR  
KIPSGPNAPCFLACMMKQIGIMDDSGMLQKETLLELAKSIFKEPEEMKLIEDYLHSCAPVN  
NESVSDGAAGCERAMLAYKCMYENASQFGIEI-

>MS|comp143661\_c0

KFTCLVLCVVAASLSQAYASEEEKA AFREAIKPIVEECSKEHGVSHDELKSAKDNQNADNI  
KPCFLGCVYKKA E VFNSKGEYDVKALEK LKKFVSNDEAYAKFAEVGKKCVSVNDKAV  
SDGDAGCERGALLTACFLEHKA EVPL-

>MS|comp145270\_c0

MWNFIVLCLALCSCTYALTEELKMQMTKLVKCNKDSQVDMMELVQLQSFVVPTKMA  
TKCVLACAYKAADVMTADGLYNIEHAYKIAEQMKNNGDEKRL ENAKKMADLCVKVNEE  
RS-

>MS|comp145826\_c0

MSKFSGLVLCVAATFISVASGESLSESLKPVIEKCSKEHGVTDADIQA AKAGSSDGINPC  
FLFCVFQNA GIFDAKGEYDAATGLKNLRQIVKDNDQYKNLEHAFNDCSKIKDKPVSDAA  
GCEKGLHL-

>MS|comp148301\_c0

MLLIEIVKFLILVAMCEAMTMKQIRNTGKMMRKSCQPKNNVEDEKIDPIAEGIFIDEKEVK  
CYMACIMKMANTIKNGKLNFDAAIKQADLLLPDEVKEPAKEAILACKKAADGHKDICDA  
SFHVTKCIYNQNP GIFYFP-

>MS|comp148423\_c0

KEHIREALENGCAKCTDKQKEGTRRVIAHLIKHKNADWQKLKAKYDPEGKYTHKYEKE  
LEEVQH-

>MS|comp150111\_c0

MDRKGLCLLIVAMFLATGSDAMSRQQLKNSGKVLKKNMKNQVTE DQIGTIDKGNFV  
EDKKVMCYIACIFEMTNVIKNGKLN YDASIRQIDLMYPPDLKEGAKAAVDKCKDVQKKY  
KDICEASFYVAKCMYEFNPADFIFA-

>MS|comp150160\_c0

MTKVLLTFLVITFALTRA ASTQMKDAMPKEAMTTTTMANQDSSIDSTDIDVIAVMNAC  
NESFRIEMSYIQAMNESGSFLDET DKTPKCFIRC VFTNVGIVSEDGKQFNPARAAFIFAGER

NGKTMDDIGDMTVACAADRQETPCERSYQFLRCLMSMEIEKYEKS-  
>MS|comp150353\_c0  
MFKSGIVYFVVAVFLGNALGISDELRSIQSKLLTVGAECIKEHPLSIDDLAAFKSRVFE  
GENAGCFSACIFNKLGLFDDKGTWAHVEAFENAKKVFNKEDLKNVQSFLTACAEVNEA  
EVTDGEKGCRAKLAYDCFIKNEYKLGFDLDF-  
>MS|comp152336\_c0  
MYARVLIRFLEAKLCAAKILNLLQMNQSYLLLLIAACVEISYGMTRAQVKKTMTIKNQC  
MPKNSVTEDQVKNIEQGFNEDPNIMCYVACVYKSLQVVKNKLDVGLISKQIDALYPPE  
LKEPTKKAVALCINSQDNYNDLCSRVFHGAKCLYEKDPACFIFP-  
>MS|comp154792\_c0  
MMMMYSSLAMMLLTYLTIQSNATETSTYTTKYDGDLDLDEILNNERLLIGYVNCLMDNGPC  
TADGKELKKNIPDAIENDCKKCTDRQRDGS DRV MHYLIDHRPDDWVKLEEKYNSDGSYK  
MKYLSSKKTEDSKETNVTKSDEETKNSSE-  
>MS|comp154997\_c0  
MADSRMRLVCLVCVIFAASSAMASKELLTKMSSGFTKVVDQCKNELNVGEHIMQDMYN  
FWREEYALVNRDLGCMVMCMAAKLDLIGDDQKMHHGKAEEFAKSHGADDALAKQLVG  
LIHECETHAGVEDACSRTLEVAKCFRSGIHELDWQPKVEVIVTEVLTD-  
>MS|comp156324\_c0  
MTSKCGLLLAVMAAVAGSVMGTAEVMSHVTAHFGKALEECREESGLSAEILEEFQHFWR  
EDFEVVHRELGCAIICMSNKFSLLQDDSRMHVNMHDYVKSFPNGEILSGKLVELIHNC  
KKFDSMTDDCDRVVKVAACFKVDAKAAGIAPEVAMIEAVMEKY-  
>MS|comp156380\_c0  
MMFFCSTVFFYPFLQMTREQVKSSGKMIKKTCSVKNNLSEDQVKDVKGNFIEDKNFMC  
YVACVYKMGQTIKNTINHDMLLKQVEMMFPTKAPVKAIEHCRPVAKKYKDVCE  
AAYWTAKCTYEFDPANFMFP-  
>MS|comp156923\_c0  
MFKWLIIVALVAASYGDPISERDNKSATLKPLSVCCDIPELGDPKHLAKCSNPKLPGPCND  
IQCVFEESGFLTDVNTLNKEAYKNHLKQWEENHAGWSVAVDKAIKDCVSDPRQHLNYP  
CKAYDVFTCTGIAMLKKCPAAAWKC-  
>MS|comp158230\_c0  
MFGSKTVFYLLTVFSACFGAVDIKKYLKVCDRNAIDVNDCMADAVQKGIAMVIHGPELG  
VPPIDPYLQKEFRVEYKNNQILAKMILKNIYVEGLKEAKVHDARLRADDDKFHLEVDLTS  
PMVAVKAQYYGEGQFNSLKIVAYGDFNTTMTDLVYTWKLSGVTEKNGTETYVRIKDFYM  
RPDLASIVTEFRNENPESREFTDLGTRFANENWQTLYKEFLPYAQANWKRIGIKVANKLFL  
KVPYDQLFPSSS-  
>MS|comp158329\_c0  
MKTFLVLAACILLAQGLTDEQKEKLLKHNTTECLTETKVDEALVNKLKTGDYKTESEPLKK  
YALCMLMKSELMTKEGKFKKDVAKVPNAADKPNVEKLIDSLANKGNTPHQTAWNY  
VKCYHEKDPKHAIFV-  
>MS|comp158921\_c0  
MFKFCVFLAFCVAASYAAPGGTYCGETPSVIYQCLNSPKVISAVPAKCAKYDDECEKLT  
VFRESKWLGDGTAVDKAKVLAHLDQYERDHAEWGPAVQFAKTA CLGPELKAQGVFLNCP  
AYDVTHCILSSFIKHATPTQWSSSASCYPHAYAAACPVCPSPDCFSQPYPYGCNACYLQP  
RTP-

>MS|comp159796\_c1  
MYRLVILSIVAVSALADEMGMRRECGRMFHPSVRCCCKTSELKDKFMLS EDLKECFQMR  
GNPVTCENEVCIAKKKGFATDDDKLDYTKLEEVMTKEIDDKDLLADMINKNCVNGDLEKY  
GPPDFCEFMKMRHCISMQMLNHC PDWDDAGECSK LKGAVADCVKLFA-

>MS|comp160581\_c0  
MIRSCLVLA AVFQV LFGQESGPDPRDGRQPVPHYCLSPPPGTDLHKCCPIPKLFPDGDME  
RCGIEKASVDQSKSPPKPRIPCKESICLMQNaNMLLANHSVDYEKLRTFVDIWADSNPEFT  
EAILEAKKAKAKDGGPSGPPVCEQDRIFYCLTSNVLWNCKLRDFEDCRVLKAHMDECRP  
YYWKKREDEANAQTS-

>MS|comp161014\_c0  
MSRHFNLLTDSSRMHHDNTEQFIQAFPNGEV LARQMVSLIHGCEKQFDHEEDHCWRILH  
VAECFKQACVQHGVAPTMMMMTEFIMEAEAR-

>MS|comp161605\_c0  
MRAGGLCGQYSQELYKMKS FVVFCLVLVGVYANVTLPPTQQEKAQKLA AE CVKESGV  
STEVLAEAKKGHIVEDENLKKFTFCFFKAGIVSDGKLNVEVATAKLPPGVDKEDAKKV  
LEGCKSKTGKDTADTVFEIFKCYHKGTKTHILLAGL-

>MS|comp393373\_c0  
MSRLKTAIAECTKVVESIFEVCEYASVFND CMHIKMEHILDQVMMERRLEAIGKITTDPEQ  
WGDTEDEILKLVKDEL-

>MS|comp427468\_c0  
MFVYRYMIAFH TLCV VYVVGQHEKESKFGEIVKRTVIATAHTCMDHVNATVKDLENLR  
DREEN-

>MS|comp502645\_c0  
MKS FV VFCVLVAGAFANVSLPPKQNEKANQIATECMKESGLKPEVLAEAKKGHISDDEH  
LKKFTFCFFKAGIVSEDGKLNTEVALAKLPP-

>MS|comp60723\_c0  
MFTGTLPVVLCLVAAAYGGKEKPVFSDEIKEIIQTVHDECVGKTGVAEEDITNCENGIFKE  
DTKLKCYMFCLMEEASLVDDDGTVDYDMLVSLIPDEYYERTTKMIFSCKHLDTPKDKC  
QRAFEVHRCSYKDPDLYFLF-

>MS|comp672758\_c0  
LEKIGVVKSNKYSKLGFMTAVTPLVFTNRKKLDHMKTVSENC DREVNHKQETPCQLGNE  
VTTCIFKYAPELHFKS-

>MS|comp71248\_c0  
KKMADLCVKVNEEKVSDGEKGC DRAALIFKCTVDNAPKFGFKL-

>MS|comp141177\_c0  
MIKFSVCLYFV VAVHFVNVKCMTKDQE QEIIKAMKPLAE ECASYCGLKDEDLKKYQG  
GDDMNPCFKKMMQKLG LLDQEGKYDKATLHETMSQYGEDKEKAQKIEDQIDSCFMA  
NADNNGDDEEAIKRVDVMFN CIKELKE-

>MS|comp152359\_c0  
MSKFTCLVFFIVAASISKAYASEEEKAAFREAVKPIIECSKEHGVSIDELKAAKAAASADGI  
DNCFLGCVFKKAEVINAKGEFDL DNALTKLKG FVSNE DHFAKFEDIGK KCASVNEKPVSD  
GDAGCERAAML TACFLEHKGEMPLNF-

>MS|comp161583\_c1  
MNIKTSFIDYPAHNIPEVIRVGQLFQVATY LADGHK DICDASFHVTKCIYNQNP GIFYFP-



>MS|comp167844\_c0  
MSKFTCLILCVVAASLSSFYVRAHTPTFRDSLQPLIEACSEEYPGVTSDMVNVQAAKEGNPN  
IIHPCFNGCVFKKAGFINEKGEYDTNSALTNLRKLVTHEEQYRKLAEIARQCTSVKDTVTD  
GEAGCERGARISACFLQQKDNVSL-

>MS|comp173090\_c0  
MSKFTCIVFCIVAASLTKVSHAVTEEEKAAFREVMAPIIDECSGEHGVSKADIQAAKEAGS  
ADGIKPCFLGCVMKKTETLDDKGLFDAETALSCLRFTVKSDEDFAKFEEIGKACMSVNEK  
SVSDGEAGCERAKLVLACFLEHKADIPF-

>MS|comp152974\_c0  
MFNVYFCVFCVGLSLNIKASSLDDLKLYVEVIECSNDYPITVADMTELRRKIMPDPSEPI  
KCLFACVYKKTGMMNEKGELSDVGVNEMSRKYLADDPKIKKSEEFTEACKSVNDVAV  
NDGERGCERAALIFKCTVEKAPDFDLI-

>Pxy|OBP19  
MYNSCVLFLLLCVSLTHGNLFLEELRKKGASLKPLSACRDIPDLGDPEHLAACSSPKLQGP  
CNDIQCVFEKSGFLVDKQTLTDLKEAYRTHLRRWAEHQGWSEAAEKAVRDCVDRELRLQYL  
DHPCRAYDAFTCTGIAMLLKCCPEEAWKCSHKK-

>Pxy|OBP9  
MFPYIFTYVFIGVYFTCTTGTLMKDEERVKFHKTIQSCAQQHPISPEDQGSLVNWRIQSDTQE  
VKCFIACIFQGIGMIDEKGRFDAHVNDITKLMTEDDPDVLQQTQDITESCKYVNDRHV  
GDPHETCERAASLFRCAAKWTGKKDS-

>Pxy|OBP3  
MFLASLTLVLTITLSSGKMAEEPRTREMPDMSSSSSVSFHDGNDEHAEDDMMGIMTH  
CNETFRFDPAYWQSLNESGTFPDENDKNPKCFIRCIVLEGTRVASLDSVFDAARAAEVFAGE  
RGGPRMDDLETLAKNCADDRRETCKCERAYGFMKCLMEAEIETYEYKADDS-

>Pxy|OBP32  
MKFLVVFAICLVAAQALTDEQKEKLLKHKTECLAETKPEVEHVDKLNKGDYTTENEALK  
KYAHCMMIKSELMTKDGKFRKDALAKVPNPADKPMVEKLDITCLANKGDTPQQTAWN  
YVKCYHEKDPKHAIFLKLG-

>Pxy|OBP23  
MFRAHSDQCLASSGATAADVDSLSSGALVDTPALRRHVYCILLRCKAIGKDGKLQKAAVL  
GRLARIDDKNATKVLNCFEQTGETPEDLAWNLFKCGYDKKSIVFEYMPNASPSSGEN-

>Pxy|OBP13  
MTDEKAKLQFTKIAMNCTKKYPLEVHEILDQLKLVPTKKTAKCLLACAYRLEGSMNEK  
GLLDYEHMMKTADLLADGDEKRLKNAKAVADICIKVNDETVNDGEADCRAALLFKCA  
TETAPKYGFKV-

>Pxy|OBP12  
MKDEERLKFHKTIQTCVQRHPISPEDQGSLVNWQISDTQEVKCFIACIFQGIGMIDEKGRF  
DAAHVNDITKLMTEDDPDVLQQTQDITESCKYVNDRHAGDP-

>Pxy|OBP6  
MTRAQLKKTLSMPKKQCMTKHGVTEDMVGGIEGGKFVEDRKVMCIYACIYQTIQVMKN  
DRLNKDLVIKQVDLLYPPELKAPTAAVKQCMVPQDKYPMCEGVFWSVKCLYEQDPAS  
FVFP-

>Pxy|OBP31  
MEGHKVLTPLLFGVLVSVSAMDEEMAELAKMIRDNCGAETEVDMGLIDQVNGGADLM

PDGKCLKCYIKCVMETAGMMSEGEVDVEAVLALLPEDFKAKNEKSLRACGTQKGADDCD  
TAFQTQACWQKANKADYFLV-

>PxyGOBP71-like2

MRVLVLCFSFALLDLLFHANALTCRSDGGPKEEELKIIYMNCLKSQDGKNSSNSRDYSDDY  
SSREKRKHSKGSNFGRRRENAFGGREGSYGSRDEWSDRDWTRSRDQTQSRGDWSSRDDK  
VSSGSTQYGRSESGSSRDSMNNMRTSTNNMRNNMNSRDSRMGGGRDDYADNDYYESYTH  
GYNNRQQQSRMRKRERSGHRSQYNPNTSRSGSGSGSGHDDSYRNNDKNSENSSSR  
DSDHKACALHCFLEEMTGDNMMPDRYLVTQVITKDVKNEDLRDFLQESIEECFQILYN  
ENMQDKCDFSKNMLCLSEKGRANCDDWKDDIKI-

>PxyGOBP56d-like2

MKTIVFVCLVATAAAAAANVKHAHLTKDQSARVHEYGMECMKKTGVNPELVAKAKKGEF  
TDDEALKKFTLCFFQKTGIITSDGKLNNEEVALSKLPAEVDKAAVKKVLDECKKKTGKDMA  
DSAFEVFKCYHKATPTHVSF-

>PxyGOBP28a-like

MANYIRAICFLTFFVLFSKGSALTNAQNSAVLSTLLSGAIQCFGEHPLSAAEMDAIKNKKTP  
ETENAKCFAACVFKRVGIMDNKGNISGTQAVQNAKKVFDKDSVKKLEDFIGECTKVNQ  
HVNDGAKGCDRAKLAFPCFVNNAQKYGVSLNF-

>PxyGOBP56a-like

MKMGSSMYVAFLAVAFVAIFGNIHAISDENREKLLKEMGPIFMECAKEGALNLDDLKQYK  
GVKELPADEGVTCFFACAFKKIGMIDDKGMFAVEESVERGKKYMDSEEKQKHLEEAANT  
CASVNDESVDGDKGCERAKHLYECLIKQAEKFGLELPTSAV-

>PxyGOBP72-like4

MFQNILKLVVLELLLFYGVADAMTRQQLKNSGKMMKKSMPKNDVTEEQVGDIEKGHFI  
EERNVMCYVACIYSMSQLVKNKLNYESVIKQVDMMPPELREPTKAAAEEKCKDVGECP  
TPPLESQKPYKTKTKDNSGLNPVLDY-

>PxyGOBPlush-like

MFLKNHWLIVMVVATGICVVSITRKQMKNTSKIMKKSMPKNNVTEQVGNIEQGEFL  
EERKVMCYIKCIYAMGGAIKNDKFVYDAMIKHVNLVFPPEIKEPTLAINQCRDVKQYA  
DSCEAAYWVAKCMYEGPEQFFFP-

>PxyGOBP72-like3

MERREFGLLIIVILTSGAEAMTRAQLKNSAKMMKKSCLGKVDVPEENIVDIEKGFIEEK  
NVMCYIACIYQMSQIVKNNKLSYEASIKQVDLMYPSDIKDAVKKISIEQCKDVSKKYKDL  
EASYWTAKCIYDHPKIFIFA-

>PxyGOBP72-like2

MVLLVLIKAYVLFVALCDAMTMKQLKNTGKMMRKSCQPKVNAEDAQIDGLKDGVFLEE  
KETMCYIACIMKMANAIKNGKLNIEAAMKQADLLLPEEIKEPAKAAITSCRKVADQYKDI  
CEACFYSTKCIYTQNPDIFFFP-

>PxyGOBP72-like1

MARSLPVLHPEHSCFNGLAVMTMKQLKNTGKMMRKSCQPKVNAEDAQIDGLKDGVL  
EEKETMCYIACIMKMANAIKNGKLNIEAAMKQADLLLPEEIKEPAKAAITSCRKVADQY  
KDICEACFYSTKCIYTQNPDIFFFP-

>PxyGOBP70

MVCRLSALACFCMFAISLCGSSIPSESDTRCKNPPTAPQKIERVITLCQDEIKLSILREALD  
VIKEEHTMPAQRNRNKREVPFSHDEKRIAGCLLQCVYRKVKAVDGYGFPTLEGLVGLYSD

GVNERGYFMAVLEASRGCLMRHHDRFSRTVPMDNGRNCVDFDIFECISDRIGEYCGNSG  
L-

>PxylGOBP56d-like1

MIAGCHAHLTKDQSARVHEYGMECMKKTGVNAELVAKAKKGEFTDDEALKKFTLCFFQ  
KTGILTSDGKLNEEVALSKLPAEVDKAAVKKVLDECKKKTGKDMADSAFEVFKCYHKAT  
PTHVSF-

>PxylGOBP83a-like

MLIAAVFGGKSKPEFSEEIKEI IQHVHNECVGKTGVAEDDITNCENGVFKDDQKLKCYMF  
CLLEEASVADENGVVDYEMMISLIPEDYTERVSKMIMACKHLDTPDKDKCQRAFDVHKC  
SYEKDPDLYFLF-

>PxylGOBP71-like1

MIYMNCLKSQDGKNSSNSRDYSDDYSSREKRKHSKGSNFGRRENAFGGREESYGSRDEW  
SDRDWTRSRDQTQSRGDWSSRDDKVSSGSTQYGRSESGSSRDSMNNMRTTTNNMRNNM  
NSRDSRMGGGREDYADNDYESDTHGYNHRQQSRRMKRERSSGHRSQYNPNTSRSGSG  
SGSGSGHEDSYRNNDKNSSENNSSRSDSHKACALHCFLEELEM TGDNGMPDRYLVTQVI  
TKDVKNEDLRDFLQESIEECFQILYNENMQDKCDFSKNMLCLSEKGRANCDDWKDDIKI

-

>PxylGOBP1-like2

MWFPVRLSAAVLLTLAAMDAEGSKETMKDITSGFFKVLNECKHELNLDPHLVGDYFHY  
WRQEYALLDRDLGCAILCMSRKLELIDASGKLHHGNTQEFKAEKHGADNSMASKLVEVLH  
SCEKQHEAVSDDCQRALEVAKCFRSSVHELGWAPTIDVIIIEVLTDM-

>PxylGOBP1-like1

MADSTVSRWRRFALLVAIQVKKSESSADIMQKLTIGFTEALEHCKKDLQISNEVMQD  
FYNFWREDYALVNREMGCVLMCMAARLDLVTEDLKMHHGNAHEFAKKHGADDTMAK  
QLVSIIECEQGAASVPDECARTLEMAKCFKTRIHCLKWAPSMEVVLEEVITELKN-

>PxylOBPPA10-3

MKFLILSVVVAALARPEDLYDDSNIQLDVDELISNERLMKAYAACFLSKGPCTTEGSKV  
KQLLPEAVENICGKCTAKQRGMVRKMVVMRERLPSEWEQLVATYDPEGKYQPKFEDFL  
ALNE-

>PxylOBPPA10-2

WVARPGDLYDDSKSNLDIDELVSNERLLKGYAHCFLGTGPCTPEGNNIKKIPEALENVCK  
KCTPKQRVMVRKMIAAFKEKLPAEWSELAKTYDSEGKYKENVKTFLAQSD-

>PxylOBPPA10-1

MKVAVIIVSMLVVAACAQEKYKSDLEGDFDVTELLNNERLLLSYTRCLIDKGPCTPEVKAV  
KDKLPEALATKCAKCTDKQKELGKKLAVELKRTHPAVWAQLVAKYDPQGQHQAQAFQEF  
TKQ-

>PxylOBP-2

CGLMVAALPAARGTAEVMSHVTAHFGKTL EECREESGLS GEIMEEFHFWREDFEVVHR  
ELGCAIICMSNKFQLMQDDARMHHENMHDYIKSFPKGDLLSETMVRLIHNCEKKYDDID  
DERSRVVKTAAAC-

>PxylOBP-1

VTLGFGEALEHCREQSQTGEMMEEFYHFWREDFKFEARAVGCAIHCMSRYFNLLGGQQ  
RMHHDNTHKFIQSFPNGEVL SHQMVGIHTCEQQHDAETDDCWIRLVAECFKRESQAQG  
LAPSMEMMLMA-

>PxylGOBP2

MASVLSLVVCGLMMAALPAVRGTAEVMSHVTAHFGKTLLEECREESGLSGEIMEEFHHFW  
REDFEVVHRELGCAIICMSNKFQLMQDDARMHHENMHDYIKSFPKGDLLSETMVRLIHN  
CEKKYDDIDDECSRNVKTAACFKKDAQAEGIAPELTMIEAVLKKY-

>PxylGOBP1-2

MERRWCLLVLA AAAAGLPGVVRGTVEVMKDVTLGFGAELEQCREQSQLTEEMMEEFYH  
FWREDFKFEARAVGCAIHCMSRYFNLLGEQORMHHDNTHKFIQSPNGEVLSHQMVGIH  
TCEQQHDAETDHCWRILRVAECFKRESQAQGLAPSMEMMLMAEFIMEADV-

>PxylOBP36

MASVWSLVVCGLMMAALPAARGTAEVMSHVTAHFGKTLLEECREESGLSGEIMEEFHHF  
WREDFEVHRELGCAIICMSNKFQLMQDDARMHHENMHDYIKSFPKGDLLSETMVRLIH  
NCEKKYDDIDDECSRNVKTAACFKKDAQAEGIAPELTMIEAVLEKY-

>PxylOBP24

MIPATVLLAVLPSVLGLSPLLFESLKSEPTISTLYTTDKKADKITNECLVEMYPRNLNYPL  
NIDKNDVPCILHCVLKFKGIMSNDGKIIKNYRVRVQIHRYPRIISDVGDTCAQKIKSM  
DLSRDVCKKAKVFNECTQLFAVSLKDSGR-

>PxylOBP18

MNLPQVSPFQPFKKEQLTRIKMNEEVFPFRKNLTECAHQVKAKATDVEDFLKRIPQSTA  
QGKCFVACILKRNQLIKNNKIQKESLIEVNRAVYGDDSEVMARLKTAIIECEEVFDIFEICE  
YASMFNDCMHMKMEHILDKVTMDRRMKALGQKASADAYTDDCTEHDDEILQLLKDEL-

>PxylOBP35

MERRLRLVRVLVAASLPMLVLSSVEVMKDVTLGFGALKHCREQSQLTEEMMEEFFHFW  
RDDFKFEQREVGCAIHCMSHYFNLLDDTHRMHHQNTHKFIKSPNGEVLSSQMVGIHHTC  
EQAHDKEPDNCWRILRIAECFKKECQAQGIAPTMEMLMAEFIMETDV-

>PxylOBP28

MSECLKEVQASDTRTVKRLSPSIHSPHGECLACVLKRNGVIENGKVNKGNLIALVKNFY  
AKNTKVMKKLDKNLDRICIGASVQVRDECSMAELLNQCTNELMANNKHKLTVDY-

>TcasOBP01

MKTAVALLFLALAACTKQEDDDRQETIRQYRDDCIAETKVPALIDRADNGDFTDDAKL  
QCFSKCFYQKAGFVSETGDLLFDVIKDKIPKEANREKALAIIDKCKELKGADSCETVYLVH  
KCYFLHSYGTDKKTE-

>TcasOBP02

MKAFIVLVAVAVCAQALTDEQKEKIKNYHKECSAVSGVSQDVITKARKGEFIEDPKFKEHL  
FCFSKKAGFQNEAGDFQEEVIRKKNLNAELNDLDATNKLIKCAVKKDSPQQTAFETIKCY  
YENTPTHVSLA-

>TcasOBP03

MKFLVVISTVLMANIVQGLTDEQKSKLEEYSKECLKESKVDESVLKEAEKGVYLDLDPKL  
MNHVYCLVKKINSQKDKGELEVTQIKEKLMQINDEKEVDKLIQLCLVQEKSARYSLGK  
CEVSS-

>TcasOBP04

MRASAVFLSSFIISIQAAAFNNPEDELRRSAACLEQSKVSSSESIKNLQIGNFDDDERLKEYLF  
CVSKNAGYQDPAGHLQHEMIRLRFKGGRYSDDTINEVLQQCGHQKDTQPETAQFMKCA  
YQNAFPRNYK-

>TcasOBP05

MKTIICFVFLAGAWFCFQALTKEQIDKLEPISKECRELNGISEDILKVRERGEAVNEPKLK  
NHVLCVSKKTGLASETGETNVEVLRTRKLRKVSSENDDEVNSIIQKCVVKKSTPEETAFAEIFV  
CLRKVKPNFSPAN-

>TcasOBP06

MNFVCVIFILVAIIGAHLSEQQTEKLNQLSKECRALTGVSQETITNARNGNFEEDPKLKLQ  
VLCIGKKVGIMNESSQIDENVLKAKLRKVSNDDEEVNKIYNKCAVKKPAPEETAFAETIKCV  
MKNKPKFSPVE-

>TcasOBP07

MKFLVCLLFVIVAANALTKEQKEKLDKISKECKNQSGVSQELIDKARTGELINDPKLKAQI  
YCVSKKAGLATEAGEINMDNLKTKLKKVAANDDEVNKKIQCVCVKKPTPEETAFAEVYKC  
LHANKPNFVVD-

>TcasOBP08

MENRLVLLIVINTLLLAQAAAKQDFHKKCLASSGANADTIAKVRNGKFSNDPQTQKYFG  
CMLRSVGVVNQAGQLQVAALRKQVPKDMKRDEAMKIYMSCKDKKGANNDETAYLLYK  
CFWEASPRHVKIDGQ-

>TcasOBP09

MKYLLFLTITLTCGIFAFSLSNREQAIFLSTYSTCLETSKVDSERALRTASGIIDDEPKLKEF  
LFCINKQNGVQDDAGNFVKDAVRKRIEHPLLDKTMETIIVNKCTRKRETGEETAYQFLKCS  
YFTIMNEKHQ-

>TcasOBP10

MNIYTCLVLVIAASAQHLTEEQKNNWRKWSNECKVLIGVSQEAINKIRNNEFDSVDDKI  
KKHGLCFAKKASLADSSGNIINQIKIKLRVIEDDEEVDRIVTKCTIRKNTPEETTFETFR  
LRENSSKFVPV-

>TcasOBP11

MKQIYCLITVVVLIPTLTALENEGQNPDTANCVLGGQRIKDSEIAKMAHCILTKTNLMTD  
KGTFNNSLLKERLRQSVHSDELVDKVVMMCTVEKETPLKSAFSGYKCLRYLVPWFPLD-

>TcasOBP12

MKIVLCLLALATVALAKKFLAEDTDKLEVMINECKTKTGVPDDILQKARNGEKIDDPKL  
REHALCMMKKSEMMNDAGEMQMDKIRARIKHAVSNEAEGTRIMNECAVKKDTPLATAY  
EMICCLIRNKNSVDE-

>TcasOBP13

MKVVFVCLAVFALVAAAQAETAKEKLRKYSDCKSVSGVSELLNKVRNHEDVHDPKLDE  
HGFCILKKAGFMNEAGDILADTIKTKLKENSEHPDVTVDALVEKCKNEKKDTPQHTASHLFT  
CLVDKVKVHSH-

>TcasOBP14

MKLFILLSLLSVCYARKWFDKDPQDVAKWQKECFEASGVSMESMNKLPNITLSEDPKLGE  
NAFCLLKKLGFISEDGTLIEKLRSLKNQWGDEIANKLVNECARQKSTPQETAHEMFLCI  
PAKPK-

>TcasOBP15

MKIVLICVLIGLVVAKQKQDQTLDEEKEKMKKWTQECIQESGVTSEILQQLRNQKRVEDP  
KLKEYTFCTFKKNGFMNEDGKLQYDVIKSTLMKVSSEEEANKVVKDCVVEKSTPQDTA  
FETVDCWYRYKKN-

>TcasOBP16

MIRYYIVLLLYFFAPPGISEEMQELVNLHSTCVAETGVSEDLINKVNSDKVMIDDEKLKC

YIKCLLTETGCISDDGVVDVEATIALLPEDMKAKTTPVIRSCGAKMGANPCESAWLTHKC  
YLETSPADYVLI-

>TcasOBP17

MSPLLLIFISCLFPRGISEEMQELANTLHATCVDETGVSEDAIESARKGNFAPDDKLKCYM  
KCIMEQMACIDDEGIIDVEATIAVLPEEYQAKAEPIVRKCGTKIGANACDNAFLTNKCWYE  
EDPEVSLQLN-

>TcasOBP18

MYKTRVIYVLFALCLVEIFVSRAIEMDDDMKELINNLHNTCTGETGATDDQIENARKGNF  
AEDDSFKCYFKCVFDQMGCMDDGKVDSEAVIAVMPPELADKIASTVRGCTEVGANPCE  
TAWLANKCYQKSNPDVSKVSSNVRSD-

>TcasOBP19

MSRMLPAALFVVLATLTFATAEIVVPDDLKDYINELHDHCLKEMGLTEGDHKNYNIHVKD  
PKMMCYMKCLMTTSKWMNMDESIQYDFILSSVHPAVKNILLPALDKCRDIPKGTMECEK  
AYNFMCLFNADPENWFFI-

>TcasOBP20

MMPLKNIILIVCPLFVDIPPDLQAEIDGYYDICYKQIGLTKDDLKAYKIGDRDPKIMCFMK  
CVFVEAKWMDENENLQYDYIKNTIHSIRHITLPELENGGKKAEGDKCEKSFSFFNCMNK  
AEPEDWVLIQ-

>TcasOBP21

MMHLKNFVVLVVCPLFVEIPDLEAEIDEYFEQCPEPNGVTMDDIKAYKMGDKDPKIMCF  
MRCLFVSGKWMMDENENMQYDYIKETIHHAIRHITPELENGGKEAQTGDKCEKSFNFFMC  
MNRAEPEV-

>TcasOBP22

MKMCVIFTLLLLVVLASAEEDNVGKIESVEKKCQEKTVSEESLQKIMRLEEVDPLVKE  
NALCTLKAYGVMDDDGNIKFKFEEKLEKPEIGADEAKRVAEKCAVKKDSPEETAHQTLW  
CATEENALTDTSQEQ-

>TcasOBP23

MKISTLVAILVLAGSAVCADEDNLNTENVQSIEEDCQKETGVSESLQELSETGDSDDPLV  
KKNALCILKAYGVIDDQGEISEDKLEEKLEPDRGKEEAEKVAKSCAVKKDSPEETAHEALL  
CMQQKSQK-

>TcasOBP24

MKSFVIFVLIIVITGQINATPSLDDFKKVQKDCQKKTGVSEDESINKVNNLEPVCDLLLQE  
NALCILKTYEVMDEEGKICPDKLMEVLEPKFGKEKAELIEKCTLEKDTPQLLAHATLFLCL  
SVQKYVV-

>TcasOBP25

MNSVLFLLVCALLDKEFLMQFLQKIKKVSIEDCIAETQATKNDIKTLLEHKIPDSHEGKMI  
FCFHKHFQIQNEDGSLNKVAAISLLEPIKDHSQDIYDKVVKIFNTCFDSAERDDDSCIYASN  
LAECAIRESKSVSVQ-

>TcasOBP26

MKLFILAGILFTGVCARDQEFVEKFLQKMEKIGEECAEETHATSDDIADLIEQRDPKTHEG  
KCLIFCYHKKFNTMKEDGSLDKVGSVLALAEVRDADFELYKNILTIFVTCGDKAKIYDDP  
CETATALTMGRDEAKAVSWAYFA-

>TcasOBP27

MKSTWFFLLLACSLTCAFLEKMQEFGAQCAEETDATSDDIAELIARKLPPSTHEGKCMIFC

MQKKFNMMKENGIDRAGAIAALKPLQKADPELHQVVKIFVTCGMRVKPSPDPCDTAT  
ELALCGKKEAEAVFCRLGWKTLS-

>TcasOBP28

MKYFVVFASLFLATNALSQDFIDKFVAKVKSIGETCVPETNASKDDISSLLAHKMPDSHEG  
KCLIFCFHKQFQIQNDDGSINREGAIKALEPLKADDAELYEKVISIFKKCESTPVDGDSCLY  
AASLAECAVKEGRAVSFWKNTNFKLI-

>TcasOBP29

MKFLLVFLSVAILCTFAMDESFLQQTRDRVKAIVKECVTEEKATDSDFDDIMALKIPTSHE  
GKCVFFCSHKKFNMQHPDGSINKEGALDTFEVVKDVDAAEFHDKVITVYNHCLSTPVDPD  
PCVYSVNLQCFMKEAKAVRK-

>TcasOBP30

MKLLITLATLVVATY AIDKEFVQELRQKLRSHVEACAKEVNAGPDDVSAIFAHKLPATHEG  
KCIFFCMHKLYNAQNEDGSLNMAGALANLELIKMDPDVYTKVSTSFKNCESAPFSDSP  
CLYAAANLVTCIVKEGRAVSNNFSGFFF-

>TcasOBP31

MQLLVVVLAVCVLGANAGVSIILDPKFLEKLTQEVQAVGTSCGEKEHATADDMIEIMEEK  
PPTSHEAKCVVACFYKHYKMMKEDGTFDKDAVKA FDEIKAQDAEIHAKILKVIDACDA  
KKQMSDDHCVSAASMAGCVKTEAIAV-

>TcasOBP32

MLILIAVNCHKCIIVSALSLSATVFGQSLSEDEMRENARKLMTSCKDKVGASDADVEALK  
MHQMPESEREGFCMLECVFDSA KIMQDGKFSKSGMIEGFKPLIGDDKAKLESLEKLSATCE  
SELGDGEDKCETAKRLVECVIKNGKTHGFVPPP-

>TcasOBP33

MNFFAICLCFVASTVGVSSSEENDINEIRSVEENCQKQTGVSVEKVNNFELVDDPLVKENAL  
CILKAYGIMDEDGNIYEDKLKEQITSELGEKNAEQVAKKCTIKKESPQETAHESLWCVGEQ  
KPIPGASPDEKN-

>TcasOBP34

MSKTVFIFVIFFYLD FYATGDES VYLSNHEACVKLSGVDETLL ETIYEGDVFEDMKFKTYI  
HCFFKKSGFQDENGVMHFDAIKSSFHKDFSQTENIDKTITECEEKKLNGESALET AFLHFK  
CFMGEL-

>TcasOBP35

MKAILLLL VATLSFYHMSEAQMKAALKLVRNVCQPKTKATNEQIEAMHTGNWDLKNG  
KCYMWCILNMYKLI GKDNSFDWEAGIATLKAQAPESVRDPAIASVNNCKDAVKTTSDKC  
EAAYEIAHCMYLDNPEKYFLP-

>TcasOBP36

MKYFPHLCLCLIFFELSEAAMSEAQLKAAVKLVRNMCQPKSKATNEDIEKMHHGDWNID  
RTAMCYMHCALNSNKLITKENVFNRDYAITLAEKNLPTALKTASIEAANLCKDSAKTLDD  
KCVAAYEISKCLYESNPEKYFLP-

>TcasOBP37

MILKASIFLILAVATFGAILEDSELMKVVENCVKKTNANESEFSSPNFLETTSPQALCTAKC  
LLESLEIVNSEGNINMETLKEYAQPFESPAREAVATCGEEIKSVTTCDDMEKYRKCVEPLIK  
NS-

>TcasOBP38

MAKKQLVLFFLAFIFLQKFAEVREECLSENSMTMDELHEGWK MENLPESHLCFLKCLLEK

REVIDENGVPQKEKIDEILTVKQLSDEKREEISTCITNVEKIENCETMSEIMRCFPKKRRD-

>TcasOBP39

MAKMCRLFFVLSLFFVASQALDLMADKNFVELRNKCLDKLGLKEEDLRDLKFDGDVSED  
LMCFGKCIQEEDGLLDSEGNLNEEKLEKKIETMPFLSRVSDDTKNNIMECLKEIGKIETCQ  
DFGKQRDCIHKYV-

>TcasOBP40

MNPITSVILTFLFVFSFGEKESEEAQIFTELDGPAAELRDQCLEKNSMKVTDLKYNTSNDI  
PEKELCFYKCFYEGVEFIDANGNLNVNNMKEIPASELGDEVLEITACVEKIGKIRCCGDL  
RKIEQCYQNITM-

>TcasOBP41

MWSFVTLFLSFLVLAASAQGYWTTISECLTEHSMGVEDMKKFDLPAEKMSEEMLCFNKC  
FYDKLLITDENGENTDNLMSIPLVNAIDASKHDDLVTCLKKVKGKIEEDGVKKIEQCFVE  
FI-

>TcasOBP42

MATRFVCFGLLILFVGTVLVHEILEVRALCMNETGVSEETARNYKPAEDPASEEILCMVKCIF  
EKIGCLKDDGDFVDTMKKKNYIMDVINEENEEKIYECLRGVVGKITNCRDMAAVEECFVK  
NDSK-

>TcasOBP43

MSFLILLICVIPAIFCRSFSHDELDTDLSEFIKTCNRTSPISMSKFGLFLTEFNLTEPGTMNECF  
HCLFMKYGWMDSDGGFLLHDIKQTLSESDVEIASLEFILYKCTATESNNRCERAFVFTQCF  
WDKMAEQQPSQFFYNIQEDKK-

>TcasOBP44

MKKTILLCLLSQLLLLKAAELQPEDRHQIALQCIDIVGIDQKVVEDAINIEIPKNNPKYKEF  
LACSYKKQGYQNGEILMENIKKFLQKFYHPSDLQELNSCSGHNGTNHAENAYQALQC  
IYNRLSNMTVVGN-

>TcasOBP45

MKPIFAITLTLCTTVHSAIRPWRTCGTWPPCPPNGKMLQNFRIKRASVRLTNTETNETTPE  
PKAVSSEAQATENCIIQCIFDNLQMTDSTGYPVHTKILDGLLKNTTNRELDFLQDTTDECF  
QVMDKEDTMDPCSYSNKLVTCLAEKGRSNCADWPVGELPFKP-

>TcasOBP46

MLWRRGRFLYGENLDMFDPAGLQACMKKLSVGETELAKALEDKSKDPPEKIMCLFKCAL  
EDSGFLQDGVVDKSKWPMPECVQDVVKITNCNDMVALKHCFD-

#### 4. ORs

>BmorOR1

MLLSFKDDSRSPDIQKPQNFQYMKILRFNLKIICAWPEKQLNEIRSLGHSIHRVILPIQSVVC  
LACGILYIHFHFNEIPFFILASTFITVMMNLVTCRSTALVMLFERYLVLTGRFITVMHLNFQ  
KNSDYAYKLCFTVNRMSHFYTYLVLFSMFMGLGLFNLLPLYNNYVSGAFSDPYGPNVTFE  
HSVYFAFPDYSHNFRGYIIMALFNSYVSVTCSIGLVMFDLLMCLMVMHVWGHLKILSHN  
LINFPRPKASHVITTPNGPTNVETYTEESKEVFARLRECIKHGTVDVDFANDMSETFGVIL  
LVYYGFHQVSLCMLLLECSDLSTKAMLRYPGLTLIMIQLIQSIIFELLSVADRIPDAVYQ  
LPWECMDVKNRRVVYGLRRTQNPVRFKAMGMLDVGVTMASILKTSISYFVMLRTVAT



-  
>BmorOR2ORco

MMTKVKTQGLVTDLMPICIRLLQAAGHFLFNHADTSGMNMLLRKIYSSAHAVLIVVHYI  
CMGINMAQYKDEVNELTANTITVLFFAHSIIKLAFNAFNSKSFYRTLAVWNQSNHPLFTES  
DARYHQISLSKMRRLLYFICGMTVFSVISWVTLTFFGESVRMIASKETNETLTPAPRLPLK  
AWYPFKTMSGGGYVFAFIYQIYFLLFSMALANLLDVIFCSWLIFACEQLQHLKAIMKPLME  
LSAALDTPNTAELFRVSSDKTEKVPDAVDMDIRGIYSTQQDFGMTLRGAGGKLQNFN  
AENPNGLTAKQEMLARS AIKYWVERHKHVRLVASIGDTYGTALLFHMLVSTITLTLA  
YQATKINGINVYAFSTIGYLVYTLGQVFHFCIFGNRLIESSSVMEAAYSCQWYDGSEEAK  
TFVQIVCQQCQKAMTISGAKFFNVSLDLFASVLGAVVTYFMVLIQLK-

>BmorOR3

MIFVDDAVIGIKDPREYRHLRVLRTSLRLLGAWPGHYLGEETGSKYECAPMFLLMFIKIAC  
LYLTIVYLRNNADVLFGLFELGHVYLTIFMTFVTLRSGFSLTWNPNYHKVVKKFIEMHLLY  
FKDNSEYAMKTHRRVHKISHFYTVFLKVQMIAGLTLFNVIPMYNNYRQGNYSRDRPANIT  
YDLSIYYETFDILNTPNGYIFICVFNWFASYICCSFFCSFDLILSLMISTVSGHFRIHNLTF  
PLPEAITASKKFVDKHCNGNRSEFVLEEA KLYSPAEMWQVTDRLRQCIDYHRKLVLEFTG  
DISEAFGPMLFVYYLFHQVSGCLLLLECSQLNTAALVRYGVLTVVLYQQLIQLSVIVESVG  
TVTGRLLKDAVYEVPEYMDTSNRKTVAIFLMNVQEPLHVNALGLAKVGVQSMAILKT  
SFSYFTFLRTVSE-

>BmorOR4

MFKIIKNIIVENDALKQVEKPQEFQYMKWVQYHLKYIDGWPNMDMNKKNVSKIRFHKR  
HLLVVEQTITFLSQMFYIVKNYGKLSFFEIGHSYITALMTIVIFSRSVV TALGRYRKIARYFV  
SSLHLYHYKDISEYALQTHLLVHRLSHYYTVYLISLVVTGMLLFNITPLYNNISSGVFNSPR  
PENMTFQHAVYLGPFDYTTDIKGYFVVFILNWHLSHIAASYFCTFDLFLSLLILHLWGH  
RIILNNLKTFFPKPYTNNSMYTEENQVLLKLQECIRYHNFIISFTVMMSNVYDVVIVYYL  
FHQVTGCLLLQCSTLDWESLSRYGPLTLIIFQQLIQVSMIFEILGFLSDKLPNAVYSIPWEA  
MNVNTRKLVQVLLQKSQKPIQFKAMNMMSVGVQTMASIIKTSISYFIMLRTIARD-

>BmorOR5

MLLYYPNTQVKEKVNNVEEFTYIKFLKSFCIMDFWPEREEKNSKTRIFRLRYILVLQFCF  
TLVAGVLYLTNSVGKQTFYDLGHTIITVLMNVVSLRILRCFKKYDVVGQQFINKIHLYH  
YRNDSEYAMKIHTVVKISHNMTYIFSFCIFGTVTFNLTPIFNNIGSDAYKNRPPDNVTLQ  
QCVYYALPFDYTG NFKWYLLVAIFNVQKTFCTSLFILFELSLSLMIICLWGHRLRIFIHNLNH  
IPAPRNSFEYTKERQEVDDTLKKCIQHHTLIIGFVRIMSETYGLAVLIYYAFQVVGCLLL  
LQCSQMELKTVTRFGFLT VLNQQLIQISVIFELGYMSDKLQDAVYCVPEYMDTSHRK  
MVYMMFRQSQIPLQLKAMNMLSIGVKTMSVILKTSVTYYLILKTVTTD-

>BmorOR6

MKEEYLYLQHPRTQLFYKVLAVHSTIESTIDLTWWGYTFPKYVGWVYHLQCNVVRVFGKC  
VVVSQILFIILNYQTIDKSVFIIAITITPLGALVGIKAESA KAECYVNLMMKNFMDKVHIHSY  
RKNENNEFVKKKVIQIERVSRFTAYFLVILIAINCLSWMLKPTLHNIKHFEEIMNKSMEFQY  
YIYFWTPLDYKYNLRDYIIHTLCIYLGATAVTVIVTFDIFNFIAVFHVVAHIQILKNNVKS  
NSWDDFNESEKKG YLVSILEYHAYIIRIFGEVQS AFGLNVA SNYLQNLIEDGLFLYQIMNGEK  
ENVLMYGLMIILYLGGLIFLSIVLEEIRRQNYDLCEYVYALPWEGMSLENQKIFVVFLQRT  
QPDLEFETVCGMKAGVKPAFSIVKSMFSYVVMINSRF-

>BmorOR7

MLLYHPNTQVEEKVNNVEEFTYMKFLKSFCIMDFWPEREEKNSKTRIFRLRYILVLQFCF  
TLVAGVLYLKNNFGKKTfyDLGHTIITVVMNVVSVSRLILRCFKKYDVVGGQFINKIHL  
FRNDSEYSMKTYKAVHKISNNMTYIFSFSIFVCVVTFNLPVFNIGSGAYKNRPDNL  
QQCVYALPFDYTGDFKWyMLVAIFNVQKTFCTSLFILFDLLSMMIHLWGHIRIFIHNL  
NHIPAPRNSLEYTREERQEVNNTLKKCIQHHTLIIGFVRIMSETYGLAVLIYYAFQVVGCL  
LLLQCSRLDLKTITRFGFLTMMVNQQLIQISVIFELLYGMMNDKLQEAVYCVPWYEMDTS  
RKMVYMMFRQSQIPLQLKAMNMLSIGVKTMASILKTSVTYYLMLKTITANEA-

>BmorOR8

MSLSTRCLLKDFCKYVYYAGAGNFWYEDIYKETVPYKMYVVISFFTYTVMIFLENLAALF  
GKLPEVEKNSAVMFAAIHNIVLTKMFLLYHKRSISKLNCEMA AVGENLEEASIMRRQFRK  
MRLGTALYFISVYLSLVAYGVESARRTIVEGAPFYTVVTYLPDYDNTTVLASFLRIFFYITW  
LYMMLPMMSADCMPIAHLITMTYKFVTLCRHFDQIREKFQINVKIMAKTEATEILKLGFI  
GIKMHQKLMYLADEIHRVFGIIMALQVCESSAVAVLLLLRLALSPHLDLTNAFMTYTFVCS  
LFLLLALNLWNAGELTYQASLLSNAMFYSGWYFCDFEKDWCRDIRRLVLIGCAQAQKPLI  
LKAFGVLDLSYETFVSVARMTYSVFAVYKRGD-

>BmorOR9

MLALDDPLQNVNVEDFKYVKWLRNHLKTVDAWPVYKSKRRIQKRYVLPFSAACFIS  
QTVYLKNGIGTSLFVVLVHSYICFLINGSCLCRGILIATERCKRLATCYLKTVHLFHHKRS  
EHAMKIHVIVHRLSHYYTIYLSLVFVGMVLFNFMPYNNINSGAFKSPRPESVTFQHAMY  
LALPFDYTTNIKYFVVFILNWYISLVTTSHFCTFDLFI SLMIHLWGHILMCSLEDIEGFV  
LGGSFKFTIEQNRKINSILQECIRHHQFTIDFTNEMSSTFGLVILFYFFYQVSGCLLLLACS  
QMDIESLSRFGPMTFILFQQLIQLSIVFELISSLENLNAVYNVPWESMDKNNRKMIVLL  
LQSQKLTRFKATSMNVGVQAMATILKTSVSYFIMLRMTMYQEH-

>BmorOR10

MRTNAKSFLFVPSKVLTLGVPVEKTSIFSLIYRSIMLSSQFCFLVFNGIYIGLMWGD LKA  
VSDALYMMFTQTTCCSKAIGFYFNFMKIKRIVASMDDVLF TAMSIEDQATIFSHSRTVNKLY  
KGVLGFTGFTLVQWTVLSLIGSGRTL PFMEMWVPTDISKSPNYEITFVVELWMMVISAALF  
MSVDTITVATMMFSCAQLDIIMKKTQQIQEIPLSPDLSSRNSELHEKNNGILIDCIKQHQAI  
VRFSELCEGTFQVHSFFHLGGIVFMICVIGFRMAGESPVS AQFWAALS YLVILGQLYLCW  
CANELTTKSEQLRDKLYLTPWYDQDVKFRNL CIAMECMAKALTRAGSYIPLSRAMFVS  
ILRSSYSYFAFLNQANEQ-

>BmorOR11

MDEHSHFETSLNKIKVLFKYSGMNLNTVTNTYEFLNHRWVYILNHAWTLAAVTFICIGIS  
NGQNFIEMTCIAPCVAMTVLAVSKSFFHYINENAVKS LLENLIELERTDFERTKSVQRTEIVA  
TEKQLLN MVINVLVNLCSMILVFDMTPLIIIAIKYWTTNKFVRLLPYLDIFVFPYKFEYW  
VMAYILQIWAECIVLLFIGAADCLFFTCTYIRIHFRLLYDFERLTSSRRES DGLRDEDFR  
ETYTNLVKRHQGLIESSILEMIYSKSTLSNFVLSLVICLSAFNVTVVNDVTIVMTYLIFLA  
MSLMQVYFLCFFDMLMSASEEVGNVYNC SWYTEKASTGKDLLFTITRAQKPCELTAAH  
FAYVNLKAFMRVSFTSASITTLPTI-

>BmorOR14

MSNYIFKPFHETYRIITFTMIAAMIYPNPATEKRRLIYIGLMLLSVIPLAFMIVTEMYEFFMA  
SDLNNTIRHSTVIGPFIGGFVKVALMYKRRQANELVSEINRDHLAYNGLKGEDREIAASSI  
RNCQIYCELGWTLIVMSCGLSFPVIAILLKIHSFTFKLDSTKHM IHDINNPFDDPEDRFESP  
FFEIMFVYTFSSFIYIINYGYDGGFGLCINHACLKMKLYCRALEDAMRSDSRRHEKIVAV

IEEQRRTYEYIALIQDTFNIWLGLIYVATMIQMCTCMYHIVQSFNIDVRYIIFVISIIHIYLPCR  
YAANLKCMAAETPTLIYCCGWESVSDLRIKRMMPFMVARSQVIVEITA FNMFAFDMELFV  
WIMKTSYSMFTLMRS-

>BmorOR15

MMTLVYQTDIFKPNVFFWKMFQIWAADRKSSKTYKYYSFVFLFITLIMYNSLLAINLLYTPL  
KIELLIREVIFCFTEITVSTKVLMLFKRNKILDAFDLLNKNEFRGNSEESSAIIQKNSAYKT  
YWKLYAILS NFAYSSQVLGPLIVKLIWTKLELPICNYYFLNEELRHDFSGWYIYQSFGM  
YGHMMYNVNIDTFISGLLMMAVTQLKIIQTKLLSLKLNPRERKMDRGLMNITEVLKLNEL  
LKHYELVLKYCSTVQSILDVAMFVQFGVASAII CVAMCGLIMVRSSTETLLFMV TYLFAMT  
LQIFVPAWMGTQLHFQS QELVFAAYNSEWIPRCQSFKRSIIIFVERAKIPITITGLKMFPLSLA  
TFTSIMKTAYSFFTLIRNMQALQEE-

>BmorOR16

MSFNSEDLYLNRAKFVMKYLG VVPPENENFARKFYKIFMMSLQHLFLFFQIIYIVEVWG  
DLEAVSQASYLLFTQACLCKITVFQINMNKLKELLKQMNGYVFQPKNINQQNIIKVQATR  
IKRLLFAFMISQLTCGMWALKPLFDDVGSRKFPFDMWMPVSPERSPHYHLGYSFQLVTIC  
MSAYMYFGVDSVAFSSVIFGCAQIGVIKDKIMSIPKLG IYRNHKTYTKISRYNRKTLIECVK  
HHQAVISFTELVEDTYNSYLLFQLVGSVGIICMSALRILVDWRSVQFFSILCYLSVMISQLF  
VCCWCGHEL SATSEELHTILYNCAWYDQDVKFKRDLNFMMARARRPILLRAGYYISLSR  
QSFVSILRMSYSYFAVLDQTNK-

>BmorOR17

MREDKMEINNSQKFYTKMIFRYLYSVGLGDWWYQHEDRSDSHRKLYCLWAVISNAYIFL  
NICNELLANFRKDLTDVEKNDAIQFSFAHPLIFAKIASFFFNRKKIREVFGRLLEENRSVYSC  
GELEKESMKQIKRYSLAFIGVSYMTLVMSTIDGLRAHFKEGIPIRTEVTYYPSPSNSGVIVNI  
LRFLVEFHWWYIVSVMVAIDSLAVASFVFTFKFKLLQRYFKDMGLTVRRDQSNMTDEAL  
ADKFRRDFIVGVKLHENALWCAENVQKAFGWVYSVQVFETVALLVMCLV KLVTTNHNM  
IFLLANFAFMLCVIILNGSYMMPAGDVTYEASEVPTSIFLCGWELVRQTDLRFLVVVAIQRS  
QVPVIMKAFGIMTLSYSNFI AVSLFKFYVQFQINLF-

>BmorOR18

MGDRMVTRGHFFDFNIKYL FYVGLWPSNEAKRIEKIAYKIYEYQLHVLSLIFLVTTGIGTY  
KNHKDIIALLTNLDKTLVAYNFVFKVIVFVYKREELRKLIEQIVQSGDQITEDRKALMAKL  
VIVLTGISTVIITAFSCLALFEGEMTIDAWMPFDPMKSKMNLFAASQILAATFV VPCGYRAF  
AMLGIVCSLILYLRDQLVDLQNKIRD LRFATGNVEKLRDDFKLIVKKHVRLLGYSKVIEMI  
FKEYFFIQNMAVTAELCLNAMMVS VVGLEQKTLAASFLAFLSVALLNAYIYCYLGNELIV  
QSEGIAMAAYESSWILWPVDMQKDLLIVITAAQKPMKLSAGGMAVLSVQTYSQTLYNGY  
SIFAVLNDIVN-

>BmorOR19

MHEFVINVQNETTKLYDQLNIILYILGLQGIWVDEIKLSRRFHVFFKVVTFILHIMCGMFAG  
LQFFAIFTQNSLNSQKSDVIVIGISNPMAYIFCINFIRNRNEIKDLFYHLAVVLKIYYNDVEI  
EKSMVNKIKSYLSTYVFASITILVSNIIAFFQTINSDEPFLGIITAWPKD TDTSKTASYARIGF  
YLFWCIIHFFRISTVFAVIVCILISIKYQYKILCSYFESLNKIFDDETS SHEVKEAEFENAFNGI  
KIHTQIIWCVRRQCIMCRTVFSANIMLDTFVLVILMLAMVNSENDFYGLCSQMSSVLVTV  
VLMAFFMWTAGDINVQASQLPDAIYGSGWYNCRGKSSARIRSLVTISMNKAQQPILMWA  
LGFVELSHKNFVAIIKSAYSVFSVFY-

>BmorOR20

MIQASKYPNSKTKELFRKIAHIAYICGLPNFWIEELNLPKSFIRVYDKIVRIFNVATYFFLGIE  
IAAHFTQHHLTNKQKFDLLYSISHPILNGYGVIVSRQVGNVKKVLLDLIVNLKVKYNDPV  
IEEAMIKISMTYSVSFITNCVLSMLTYTFDALLMVYKKGVTFNVIITAWPDVEDTTTEASIG  
RIGFHIFWWLWVTRPFAVYVLVINLTTCLSHQYMNLSYFFHLEDIFKENLSQNEKEAKYE  
AEYKIGVMLHANTLRCTRCHMVWNGVMSGQIIFNISLIVIIAQMMSDRTLVNTFGTV  
LTASAILISTGFFMWNAGDVTVQASRLATAMYCSGWQNCRCGKSSVSIRNMVMNTIAVAQR  
PLVLRGLGVIDLSYQSYLSIVKASYTVFVSVIY-

>BmorOR21

MNKNMNKNHYILKTYCDKIFLVGSGNFWYQKTESRNDKTLTYKIYSCVLFFTYGFMTVL  
EIMAAMMGDFPEDEKRDSVTFATSHTVVMIKFISIKNKELLKTLNRKMMMICEAHEEQT  
LMDEMYRTVKINVVAYCVAVYGSATFYVFEGLRKFYNGSHFVTIVTYPSNDDDTLAATI  
VRIATTLVLLMMLLTMIIISVDTYTMAYLIMYKYKFITLRHYFKRLRENVDELVAAGKARL  
AAEKLAQGLVEGIKMHNELLSLSKDIDKAFGTVMALQLCQSSGSASVLLLQIAVTMYLLL  
ALFLCNAGEITYQASLLSDEIFYCGWHKCNSPVLSTQRNIRDIVLIAILRAQSPLVMKAFK  
MVRSTYSVFALFYAQNK-

>BmorOR22

MNKNHYILKTYCDKIFLVGSGNFWHQKTESRNDKTLTYKIYSCVLFFTYGFMTVLEIMAA  
TMGDFPEDEKRDSVTFATSHTVVMIKFISIKNKELLKTLNRKMMMICEAHEEQTLMDM  
YRTVKINVVAYCVAVYGSATFYVFEGLRKFYNGSHFVTIVTYPSNDDDTMLASIVRIAT  
LVLLMMLLSMIIISVDTYTMAYLIMYKYKFITLRHYFKRLRENVDELVAAGKARLAAEKLA  
QGLVEGIKMHNELLSLSKDIHKAFTVMALQLCQSSGSASVLLLQIALSDQLTFTMGKIF  
FFLAAMYLLLALFLCNAGEITYQASLLSDEIFYCGWHKCNSPVLSTQRNIRDIVLIAILRAQ  
SPLVMKAFKMVELTYATFILVVRSTYSVFALFYAQNK-

>BmorOR23

MRAKTEFEKTIKLTKTALFLSGINIFLGEWNHWTRTFVDSIAYYLNIVGLYFVLIGEMYWLI  
DGTITGKSFVELSLIVPCLTISVLATAKVHYLYHNKESLLDVVDKLRREIYPDEIETANDND  
QCLNDKKETVYDNDVTEVGIVNEANELLKFNFLSTVSFVVTMTFCTMPLFGMAGEFM  
ETGKFVVLYPFAVKYPFDVYNTSFWVIVYVNFQWATIIVCTNIFGVDTLIFYALCSYIGMNF  
RLLSYKFEHLEIKRNDRIINEIIVLIKRHQELIELVNKTQSLYSLSTLFNIVTSSLLICLSGFNIT  
ILSRWSYFALLKTIYS-

>BmorOR24

MPEELFLDRSIKKIESYFRWMGINIRSGDNNKDVFKIRCIYFINVLLNTDVLGAIFWFR  
SGLEQGKTFTEVTYNAPCLTFSFLANFKMLSLIFYEKTVHELIAALQKLEIKHFLRQNCAEE  
LKMLKDEKNFLHAVFKGSKIVNYASILTFGCSPLVLIASNYKYKTGRMDYLLPLIVLYPFDV  
DNITVWPIIYVRQIWSVITAVIGVCATDYLFYTFVYISTQFRLLGHSIERVVPNGLSVRTR  
LNGNLRMKFVENLKWQELIRAASLLEQIYTKSTLYNFVTSSVIICTGFNVAVVEDFAVIL  
SFLFFLFMSLLQIILLCFFGDKLMKSSTNISDAVYNSKWYLTEKNVGKVLMLMVQIRSQRAC  
RLTAYGFAEVNLRFAFMKILSTAWSYFALLQSLYSSHE-

>BmorOR25

MFEKALRSANFYMRVIGIPTDIRDGNRTLMEERLRNRWFYCNFLWLNTDVAGEITWFVKG  
LLNGSSTLIENTYLIPCLTLCILGNVKTFFTIKYANHIIDLVAIKDLEIKNNAARKNETEIVK  
ERLKFLTTSNKFLLFVIGTGIIAFGIGPLMLTASIYFSSGDMKLLPFLIWYFPDSSDIRYWP  
VYVHQVWSACIACCAVYGPDCFYFTSCTFIHIFHILQNDITNVIVESSRARKNGLYRGCH  
QAFLELTNRHKDLIRCVNLEIISKSTLVNVVSSLLICVTGFNVMTFCWFAAPFASFLA

LGLVQTYLLCYYGDTIMCSSTEVS DAVYNSTWYGTNISQMRDYLFV MKRAQKPC KLTAY  
GFSDVNLRTFSRILSTAWSYFALLITIYRGN GQQ-

>BmorOR27

MPSSFFLPNLENPDYPSLGPTLKGLKYWGMWQSGGIKRILYNSIHAFATFFVITQYVELWII  
RNNVELALRNLSVTMLSTVCVVKAGTFVCWQKYWSGIIGFVSNLEKEQLSKNDAATQAA  
IVKYIKYSRRVTYFYWSLV TATVFTVILAPLVGFLSSPERELIANGTLPYPEIMSSWVPFDRS  
RGGFYWVTALVHTLICFYGGGVVANYDSNAVVLM SFFAGQMKLLSINCSRLFDDGNEVIS  
NNEAMKRIKECHYHHVFSTIFNSLMSPVLF LYVIICSLMLCASAVQLTTDGTSNMQRIWISE  
YLMALIAQLFLYCWHSNQVLYMALEDRLGGLFEACLESGRFPSKWKTGRLVLLRKDGRP  
ADSPAGYRPVILLDEAGKMLERIVAARIVRHLTETAPDLSAE-

>BmorOR29

MFDLQNLNEDSERPLLGNFWLINKTG LLLPKTNFGKLAYILVHEIVTFFVVTQYVELYVIR  
SDLDLVLTNLKISMLSIVCIVKVN TFWFQTSWREVLEYVNEADKFERNQTDETRGMIE  
TYTKYCRRLTYFYWSLVFTTFLTTNTPLMRYWSSPIFRENLRNGTEDFP HIFSSWMPFDK  
NHSPGSYCTIVWHVLLCAYGAAIMAAYDTCIVVIMVFFGEKLNLLRERCKKMLANDLYN  
HAFVIGQLHDIHVQLIKQSRLFN SLLSPVMFLYILMCSLMLCASAYQLTSATSTAQKLLMA  
EYLIFGIAQLFVFCWHGNDVLFKNANVSLGPYESNWWSSSPRVRADVLLLCGQLRVRHV  
FTAGPFADLTLSTFIKILKGAYSYYTLLRK-

>BmorOR33

MIYYRKCKMELNFDKIFKIAIISQKFSGTYPYTKRD KKWATHFILMHGELTIICMLFIYNIIE  
FDLKAADYSQMCRNMCLSFVYMVITLLYINMLYYQSKLKMLIETMKA EYELAKTMSEEE  
QNVILEYAKKGRWLCRAWAILTTCGMAQFFLKSIVCTIYSAIQGNFRIVQY YEVICPEVIER  
HRNNPVIFITLYFCTFFYSLYTSALYTSVLP LGGPIFLLHGCAKLEIVRLNIKNLFDNDDYV VQ  
ERLKKTVLQMQDIYCY SHEINECFQILYEFLLKATSLVLPITIFAVIQALGRGQFIPEFFAFIFG  
AFMVGTTPCYYSNMLMEKSEDVRMTLYSCGWETRFDLNTRKCIILMLCRALRPVSIRTIF  
RSVSLTTLTDVVFQQA YALFNLLNAVWN-

>BmorOR34

MIYYRKSKMELNFDKIFRIAIISQKFSGTYPYTKRD KKWATHFILMHGELTIICMLFIYNIIEF  
DLKAADYSQMCRNMCLSFVYLVITLLYINMLYYQSKLKMLIETMKA EYIEIAKTMSSEEEQ  
NVILEYAKKGRWLCRAWAILTTCGMAQFFLKSII VCTIYSAIQGNFRIVQY YEVITYPEVIERH  
RNNPVIFITMYFCTFFYSLYTSALYTSVLP LGGPIFLLHGCAKLEIVRLNIKNLFDNDDYV VQ  
ERLKKTVLQMQEICY SNEINECFQVIYEFLLKSSSLVLPITIFAVIQALGRGQFIPEFFAFIFG  
AFVVGTTPCYYSNMLMEKSEDVCMTLYSCGWETRFDLNTRKCIILMLCRALRPVSIRTIFR  
SVSLTTLTG VVFQQA YALFNLLNAVWN-

>BmorOR35

MKLWQSIREFGLEYCDLPTTLQNVASLLRAITLNIDSRHTARIPFICYVMTVVITLSYFYVFL  
VSMAWFVFRSAETRDYLAAMVVLSLGISSEIGTLKFFYTFIYIKKVQRIVREYLECDH MV  
VPESRFADNVLKTMRNVKKRAILYWVVVIGNGVVVYTKPLFMSGRHHMEDRYIVYGLEP  
MFESPNEYEVAYFLMMFGLCFICYPPANVTVFLIVVVGYTEAQMIALGEEMLRIWEDAVAH  
YNNKYHTVGALTNSSSEKNKIINQYVKFRLTEI IKMHTTNIQLLRQVEFVFRSAIAMGYVFL  
VLGLIAELLGGLENTYLQIPFALIQVLVDCYTGQKVM DASSLFEQAVYDCKWENFDKSNM  
KTVLLILQNSQKSMRLSVGGITVLGFSCMMSVMKSIYSAYATLRTTMS-

>BmorOR36

MVFNSKKNIIISLFSLLEDSRHPSVGPLRLLSLTGIWYPNSKTNITLLKRACFYVIVLFFVSQ

YLKCIKFKIDSLQLILEYAPFHMGIKTCFFQKDYNVWQDLVSFISKTERDQIAKKDPKSI  
KTIQSYISRNRKITYSFWALAFIANIGVFSKPYQNNQSDVNGTVTYNHLFDGYTPFSEPPG  
YYFSMGIIETILGHVVSFYVLGWDTLVVSIMIFFAGQMMSRLQCSRMIINGSPERTHKNIK  
CHKFHTDLIKYQKQFNLSLSPVMFVYLFVSSINLSVCIVQIAEIEDDFATVLSFFIFLLACLIQ  
LLLFWHSNEVTVQSELVSYSTFESNWTSTQNKLQKEVALLGLTTSKTLVFTAGSFNHMT  
LATFISIIRASYSFYALLNSTKY-

>BmorOR37

MELGCSRHLKLPCLSHPIGISKHGNTLSELLIYFPAIPKITYAILAVLLTVYYYIYLCSITWV  
FVRCPTGDLAAASIVFSLGVSSEIGAIKLFIIAKLRDITGEYLQCEADMAPGRLRARVGRS  
LRTVRRRAFVYWLVLVNAFAYDLMFAFLPGRHLSDEVFVIYGFEPMFESPNEFIASITLMG  
VSVVFICYTAGSISAFIVIVGYSEATMLALSDEISCVWDDACASECQPNDFIRARLGKIV  
AIHTKQIRLIREVEVVFRGALAGGFACVAFGLIAALLGGLTFLQLPFCVIQISVDCFVGQ  
RLRDANVAFETAVYNCKWEYFDKSNMKTVLLILQNSQKTMGLTAGGVAALDFTSLMTIF  
KSVYSGVHHSQTDD-

>BmorOR38

MNLSQSVNEQANEYVKMRLERISKIHSPMLPFEDIQDFRELCCIPLAVYAVTGSITASYVYA  
FLISLLWFLFARCTDPEDFQVAMVVFSLGISSEIGSTKFFNSIYIKELRKLKFDYLLYDATCP  
AQGRLRLHLLTTLRYVKRRAIYWLVIIGNGFIFAIKPLLVEGRHLAQDDLVLIGLEPMRQSP  
NYEIAIYAIMTMGVCFICYPPAHVTMFLIIVGYTEAQLALSEELKHLWDAIEHYEKHSR  
TEREADAAMKSKILNSFVNFRLVQIIKSHSTNVNLIGRVENVFRGSLAVGYVFLIVGLIAEL  
LGGLENTYLQVPFALIQVAIDCFIQRVNDANIDFEKAVYDCKWENFDKRNMKIVLLLLQ  
NAQKTVSLSAGGIKLNFSCLMVIKSIYSAYTTLRRTMK-

>BmorOR39

MLWSVFSYFTRADDVLAGIVIFSLGVSSEIGLVKLCFMYANIDKIQKITEGYLKS DAASAR  
NSRFSKNILHTMQSVKRGVIFWLVIISNGVVYLVKPIVTPGRHFMEDQFIILGLEPKYETP  
NYEIGFFMMAVGVCVTCYLPANITAYLITVAGYSEAQFLALGHELANLWPDAQLHCRAM  
NLSQSVNEQANEYVKMRLRELVKIHSTNVNLLRDIEGAFRGAIAVEFLLLIVGLIAELLGG  
LENTYMQVPFALIQVSDCLTGQRVMDANLALERAVYDCRWEEFDASNRRRVLLLLQNA  
QKVATLSAGGIATLNFSCLMVAVIKSIYSAYTTLRRTMK-

>BmorOR40

MTGAGAGTFRGTGAGPGRGDGVARRGESGETTTLGRDAFAALGCFGAADGSTARARFFPR  
VTVLNPSEVPGSGLAADSNSISDSESEPELDAQAIDAGAGVGGDIGESRARTVFGIQGH  
DASDSALRMHNNVAIYAKTTMSGNSQLTFATAATIFLKNASGPNVVAIGTDYAICVVSLSLF  
FCYRFTELVEDTYSYLLFQLVGSVGIICMSALRILVVDWRSVQFFSILCYLSVMISQLFVC  
CWCGHELSTSEELHTILYNCAWYDKDKVKFKRDLIFMMARARRPILLRAGYYIGLSRQSF  
VSVSIPRIRFNAILVI-

>BmorOR41

MMGNSTDLFLDRTKRILNFFAMWRSFEKPIPLKVYMAFIMTTQYLFLIFEIIVNVWGDM  
AEVSEASILLFTQASVCYKMTAFISKTNFVILLGLIESEIFSAQTELHEKILILKARKIKRLC  
MFFLVNAVTTCSLWAVIPLDISKMLPFKIWMPVSTGESPHYELGYLYQMITYISAXLFIS  
VDSVPLSMIMFGCAQLEIIMDKIGKVKVSWSLDQQPMQKQEVLSNYELLVECVRRYQSV  
VRFIELTEKTYHANIFFQLSGSVFIICNIGFRIAIVDSNSLQFYSMILTYLVTMLSQLFYCWC  
GHELTIRGEELRETLYQSPWHEQDIRFRKVLITMERMKRPIIFKAGHYIPLSRPTFVAILRCS  
YSYFAVLNRVRNE-

>BmorOR42

MDIPKFEELLKQIKMNFWMGIPFDNPKIQIRYYVLLLPLSLMLIEEIAFFGSRMSSENFLEL  
TQLAPCICIGVLSVLKILALTAKRQKIYELTQNLECLHKKILNDTRKTELVRKNLVLKIFITKY  
FFVLNAVLFVYNFSSPVIIAYNYIVSNEVQFVLPYAVLLPFKTDSPWIPWLIVYVYSIFCGFTC  
VLYYATVDVLYCVMTSLVCNNFSLISFKLQKVNRTAHLLEKEVVKEQQYVLKLAEDLENI  
FTAPNLFNVLIGSVEICALGFNLMIGDLTQIPGCILFLSSVLLQILIMSVFGENLISESSRIAEA  
AFLCKWYEMDQKSKKTILTIMIRSHKPKKLTAYKFSVISYGSFSKIISTSWSYFTILRTMYTP  
PGTKFQDDL-

>BmorOR44

MYTYFKVLVFWLNKDKVISLQKILHCKEFKPKPEHKEIIRKSIRKARFVMTSYATMCVGA  
VSVGILPLTENFDILPTNVEYPPFDVYKNPTYAYLYLHHIYYKPATCIIDGVMdTILAAFVA  
SAIGQIEILAFNLRNFDVLAERRRKRAISGNKYIGKYTNLYFTKRILKECILLHNSIIRYVSVI  
ESAFSLASALQFMLSVMVLCLIGIQFLSIENPTSHPMQMVWMAIYLTCMLIEVFILCWFGN  
ELIWKSNDLRQAAFDGPWRNLNRKTCMFIIIFMERCKRPMRLSAGKIFTLSLDTYTVLINW  
AYKAFVAVMRNMKK-

>BmorOR45

MKVLDNVNHAVKVTMNCRLYGLFVSDDLTKRQLIIMRAFSLMLYLFFVGGFFITQSAII  
TMWGDNLMTNVGLVLGTHLTLAKVFTLHYKEKEITNVIYKNEVRLRAETREQGKYIIS  
EMNRETTLMRLFIPFGMGTVTAWLLCTPKGELYTPAWYPCNTTKSPAHEIILAHQGIIVL  
TATLEIAIVLLMTSIVAVCRCLKLVGLSFETICDDLPSNIMNKLTADEQVIVAKRVRENVIE  
HQAVLECIINDIQDCFSSAMLVHIAISTMIICATAYQLAVEKSLDLTQRMTMASFLGGMSTEI  
FLFCYQGGHLSIDSMEVATAVYSCPWYTFPTSLKRSLLVIMIRAQQPALLTAGGFAPLLD  
FVSIMKASYSFFTVLQNASE-

>BmorOR46

MAFFIRNKMLGLTITLNTLSWAGLIMRDQYTKTQRIVRVYGWLVFLYLFVAATYVQIADL  
IDIWGDLDLMAETSLLLFMELAVISKILTIFKYDKIMEIINGTEDILCSENRELEGQKIIASIDK  
ETTRFFQYYTSSVIFTFFWFLGEHSSTFFIRAKYPFNEKSPGYEFALIHQCMVMVFTGYF  
EFNINIFFASVVGCRCLKLVALSLRNICINIPVNKKNLITPEEEKLITERLHCAISQHKYAL  
DAAEDVKHCLSKVLLVQLTVSIVIICTTAYQMAVNKSTDITIQKLSMAGYLLGASFEVFLFC  
FQGQSLNASEDIADAVYECPWYTLTQPLKRTLLIIMMRAQSPAILTAGGFVTLTDITEYMAV  
LTGHGGGDFLHRTGAEPMAECHHCGLDLDTVQHTLLVCPAWKGWRRDLVVKIGNDLSS  
VLWHRCSAATSRRRCLTSASAPSRRRRRGA-

>BmorOR47

MKLVFDNFIFALKVTLNWCYRFGIFIPDELGTGRRQKLLVQAYSVFMFMLFIGFFIITQIILFIL  
VWGDLSLMTDVGVLGTNLALSAKIAVFFFKREELASILKKNDDTLRFETREEGKKIISEID  
RETNAFMKVFFCFGVGTVIAWFLSTPKGELHIATWYPCDTKRSPAYEIIIMHQLAITADLLM  
LSMIAVCRCRVCLVGLYLQTCDDLPCNVKNKLTSDVEEVIVAKRIREYVIEHQAILDCISELQ  
NHFSPLLQLLTSVVIICVTAYQLAVEKSSDLLRKFTMASFLFAMSTEMFTFGYQGGHLS  
HDSMEVATAAYSCPWYTFPTSLKRSLLVIMIRAQQPALLTAGGFTTSLLETFTVIMKASYSF  
FTVLQEATD-

>BmorOR53

MALKKMLALTKGLEDPHPLLGP TLKALS VFGLWQTGSQKSTVIYNTFHFLTFLFVITEYI  
DLYTVRKELSKMLNLSVTVLSTICMIKTL SYVCRQSHLKV LVREISELELELMKT TDKNI  
VKRLRQYTVYTRAVTYVYWFLVVGINVVLLTSPLLKYASSEIYRSEIKNGTEPPPLILCSWF

PFDSARMPGYFWATMVHIIMSIQCGVVATYDMNAVAVMSYLKGQTSILKDKCKAIFDET  
ASSRDVLNRIRDCHRHHNILLRHYMFNSLLSPIMFVYMLICSFTICCSIIQLDSSETTISQRI  
WIIQYSIGQISQLFLYCWHSNEFAAKVKKKHFPLFPINLF-

>BmorOR54

MGLNTIKEFFVNVKRRFQDVSIDSLLWIVNIVPSLAGFSIRS DRVSAPFWIVHWSLLVYVYA  
VGNAVYQWKFANEADYITSFINVSLILIGNNSWWFLANRLLKSVLHKIEVNDELSRRS  
EQSRLKHKLLKIIKRIVLVFYMSNYVNASFIYLPNRVDVLNNYAMTPCVGMEPLTVSPNR  
ELCLTILCMQEFSIMTVVLNFQALLLCFIAHTAVMFQILADEIMALNNYENLEEHQAYVKE  
MLPIFVKRHSLSAVDNYKSLYSVPLGVNFGSNALTILLILYLPVLEWFKFIPIFVFCFMLFF  
LYCFLCQKLVNASEAFETAIYCCGWENFALREMKMIYVMLHQAQKPVELLAADIVPVNM  
NTFATTLQAMYKFVTVVKF-

>BmorOR56

MKLEKLEDPDRPLLGPVVKALKFWGLLLPESRSKKYFYLFMHFAVTVFTATEYIDVWFV  
KSDLALLNLKITMLATVSVLKVTTFLWQNAWRDLIGYVSRADLEQRATSDSRKLALI  
NGFTGYCRKITYYYWFLMYTTVAIVTVQPIFKFFSSAAYRLDVQSGNGTYLQVSSWIPW  
DKNTLPGYLLASIQTYAAIYGGGWITSFDTNAIVIMVFFRAELELLRIDCAALFDDEKSFG  
DMAFMRLKECHRRHTELVKHSRFLDSCLSPIMLLYMFVCSVMLCVTAYQITIETNPMER  
FLMTEYLVFGVAQLFMYCWHSNDVLYASQDLRGPYESAWWSRDVKYRKNLYILVAQFN  
KVIVFSAGPFTKLTVAIFIRILKGAYSYYTLLSQSQMNKT-

>BmorOR57

MPSLLKTESLALTLNLTLNLSWAGLILRDDYTKTQRIIMKVYGGVFLYLFVFTAYVQIADLV  
VIWGNIDFMTETSLILFMQLAVSAKVLTMLKSKKIMEVTNEADAILNSEKKVEGQRIIASI  
DKNTTLFLKYYGFFVAFTIICWFMGENTSTFFIRSKYPFNEKSPGREFAFVHQCIVVIFTGS  
FDENVDIISLVAVCRCLKLVALSLRNLCLDIPMKNRNLITSDEEKVITERLRNIISQHKRA  
LDAEAEIKHYLSGALLVQLMVSIVVICTTAYQLAVKKSTTMQSLTMAGYLFGTSLEVFLFC  
YQGEFLRESSEEIADAAYECPWYTLTRPLKKTLLIIMTRAQRPATLTAGGFVTLDDITEYMAI  
MKASYSFFTFLQVSE-

>BmorOR58

MKLVFDNFIFALKVTLNWCYRFGIFIPDELGTGRRQKLLVQAYSVFMFMLFIGFFIITQIILFIL  
VWGDLSLMTDVGVLGTNLALSAKIAVFFFKREELASILKKNDDTLRFETREEGKKIISEY  
PCDTKRSPAYEIIIMIHQTIAVAVIASLAITADLLMLSMAIACRRCRVKLVGLYLQ TICDDLPCN  
VKNKLTSDDEEVIVAKRIREYVIEHQAVLDCISELQNHFSPLLQVLLTSVVIICVTAYQLAVE  
KSSDMLRKFTMASFLFGMSTEMFMFGYQGGHLSHDSMEVATAAYSCPWYTFPTSLKRSL  
LVIMIRAQQPALLTAGGFTTLSLETFTVS-

>BmorOR59

MDTNPSAAGDSVAPHLRRLRQVGFCQLDPTSQSRRPILALMHRVYHRLVLAATVLYIFEQL  
TYAYQARNDMERLSRVFLMLCHLTACIAKQFVHSDADKINQLVVGDDALCNQPVETH  
RLLLLETSRRAARLLMLYSGCAVSTCILWAVPLLDQLRGRTVEFAFWIPIDYRHNAFQFAV  
VLAYAFYSTSLVAVANTTMDAFIATVLYQCTTQLRILRMNFESLPERAYALS RKTRQDYHT  
VTHELLVDCLLHYKKITETCNLLEQIFGKAILVQFGVGGWILCMAAYQIVDMEILSIEFAST  
ALFMGCILTEFLYCYGNEVTVQSGLVSESVYAMSWLSLCPRERRALVVVLERARRPLR  
PAAGRVVPLTLNTYKILKSSYSFYAVLRQTK-

>BmorOR60

MVRPCRYFAIHILLRFLGLGWVHHPHENETRNYPGLYLYYSILTQLVWVVGVLVLETIDP



FVGEKMDRFRMFSLSFVITHDLTLIKLYIFYFRNVEIQDIVRTIEIDLRYRYQNDKIRATIRI  
SRIFTAAFLFFGWVTIGNANIYGIVQDLRWKDIVKNLNETTSKPLRTLQPFIPIWPYQEDK  
HYILTFILETMGLLWTGHIVMTIDTFIASVILHMSTQFAILREAVTAYDRTMIALSEALQS  
GVLCEENNGNEENNQIFLESFYKHEIESVLESTLLSCIRQHQLLIGCVEKFSKYSGFMT  
QLLSSMAGICVVMVQVSQGASSFKSVRLVTSLAFFFAMVIQLAIQCFTGNELTIQAERAD  
AVMESKWEKMPVRLRLLLVTMMRAQRPLHLTAAGFAYIDNTCFLSILKAAYSYYAVLSQ  
KQG-

>BmorOR61

MARITDVFRLNFIFWKFLGIWGKSAPSKYNMAYTALYLSASLFVYDIFLTLNLIHTPRKLET  
LLRETMFYFNHLVAMTKILKMFIRRKILVIFDLLDCEEFKPSDEDSQEIMKRKNEFYIY  
WRIVAVTSNLSCFMQVVGPLIKMLIWKSELGLPVCKYFMSDEFNRKYFVIWYIYQSFYIY  
NQMVNNLNLDTFNCGMLWMAVGQLQILKTKFVNFKLNDIENSLDLKTRDDMQTERLRK  
YLTHYEILKYCATVQDILNITIFVQLGMSSIVICVGLCGFVAMPSTETAIFMSSYLITMTM  
QIFVPSWMGTQISFECGELMSAAYCCEWIPRSKLFKRSLLIFVERAKTPVRITGLKIFTLSD  
TFTSIMKTTYSFFTLIRQLQVDEVN-

>BmorOR63

MKLWIRNANFTISLSLTLRCLGFWSPLDGLAGNKRLLYNCYSFVFFMFLGIIYLIQVVDMI  
KIWGDPLMTGTAFLLFTNFAHATKVINIVIRKNRIQRVIQQANAVLMGVQSEEARIVKS  
CDFETSIQLCLYFLLTFVTTVGWATSAEKHQLPLRAWYPYDTSKSPAYELTYIHQVAALLIA  
AYINVAKDSLVSLLIAQCRCRLRLVGLALASLGQDLKIDYQSQLSPAQENILNRLKTCVLE  
HQTVLAAVTELQACFSKPTFAQFTVSLIICVTAFLVLSQTGNLVRLLSMGTYLMNMFQVF  
IYCYQGNKLSVESSEIAGSVYFSPWYLGSVKLRALLIVMVRSSRVAKLTAGGFTTSLAS  
FMAIKASYSLFTLLQQVKQKK-

>BmorOR64

MGVSNRGTVPFLYPLVDELVDYLNIVGVHLPFEYKTPSRYPPLAYITVVIAYIYVSYFVMV  
TDLIMQAHLHLLCQFNVLADCFENMLNDCVKGFEGLVSLHEYIHLIDEFEYNLMVGL  
RLPFSFDTPRLYLFTYVIVLIAFNHTAHYVMVTDLIMQSYLIPLICQYAVLADCFENILDCS  
NDYGDHARRNDIVYSRSMELRAILSRPMLGQLASSGLLFCVGYQATTSISVNIKCLMSL  
FYLGYNMFTLFVVCRWCEEITNKSLNIGNAVYCSGWESGMTVVPTVRSTILLVILRANKPI  
VFTAGGMYNLSLTSYTSLVKGSYSALTFLRIQHE-

>BmorOR65

MRLGFEVSISEYLYRNIFYIYTLFHILLHFYIILHMIKLDLEAIFDDIDESVALLPHRDTRRIE  
VQKILNGRMKRVVTWHISVFKAVEAVSSYGPPLAYQVMFTSIAICLIAIQTQKLENGILDI  
RFTMLGVAACLQMWIPCYLGTLLRNKAFGVGEACWNSGWHQTPLGRMIRQDIIIIVLLRA  
QQPVTIKFPGLQSIQLETFSSVIFNLYGYYYFLLLRWVDELTAHLVLSGYWSP-

>DplePOR85d

MIPVYLILVQGIIKATVVCTKKTEIESIVEGLGAIWRTDEMLTKNQIEKKHYRLKKFNFYLT  
VFYWGSMVASYQNLFTTICTILFKRLVLQDPELEFAFGNAYPYEFTKNWFTYLSVAQETT  
EFLKNFSAVLALMGPIYILCYAEQLQEESVGIANAAYETLWYEGDKTFQKNIFLIILRSQR  
ACCLTSLNYAPISLNSFTKVIQHDTEMKKYT-

>DpleOR3

MVFEDRVFDIPLVKSIFIRKPGHGKLELEKLVVNSQEKLFKLTRVLLKTYVGSVWLCVTL  
YLCGPIYQMCVTKDKSLRLLAFDMWFPYGLEDFRVYVATFIFHAYAGYLCCIAYPGLQSTI  
ILFVGQIIRQLQILTILNLDLDEIAKELVGRGELWQETCIQIFSQCVDHYIQTKRFSNKLNVI

CQPFYLALIVVATMLVCVCSVKIAISCEKLEAAVTEKWYLFNSSHKTNIRIFMMAMCQKM  
PIIYIGSITLSLQTFTWFIRTGMSFFTFLLMSVLED-

>DpleOR12

MGKSIDLLSRVAPCSALCILSTAKTLPMVTNNDILKDAVLKLRRRLHQGVDLRNSFECDELM  
KTSTILKNIITVLVGVFVCAVVLFTSMGFLMAYDFFTTGTYYQLQLPFFTKYFVDVADARI  
YTFVYLHQFVSTVLVGLNIFAADTLFFAFCSYVKMHFRILGHYYENIVGQSESETRNLR  
CVRTHQVLIKLVNQINILYSKSTLVNIMTSSFIICLCGFNITITKSKDMSTYLLFIPFLMNSLTE  
IFLMCFFGDQ MIDSSYNITQAVYSSRWYDAGEDLKRSVLLILFRSQSQCKITAAANFSDLHLR  
SFTTVCVYIIL-

>DpleOR2ORco

MSAVVYFSLALCMMALYANGSVIKLQDLSLTDGVVLKLVIKEDPEQEGKAVASIKIDMDH  
PKPKNVRNLFHKLITTSIPKFEDRILITNNNCP LGQELKKSIMITKSENRLVSDLMPNIK  
LMQMAGHFLFNHSDNSGMSSLLRKYSSIIHAFILVMHYLCMAANMAKYSEEVNELTA  
NTITVLFFSHSIIKLTFFAITSKNFYRTLAVWNQSNHPLFTESDARYHQLALTKMRRLLYFI  
CGMSFFSVICWVTITFFGESVVMLVDKETNETITEPAPRLPLKAWY PFDAMSGTMYIAAFA  
FQVYWLLFTIFIANLMDVMFCSWLIFACEQLQHLKAIMKPLMELASLDTYRPNTAELFK  
VSPEKSDKTPDPIDMDIRGIYSTQQDFGMTLRGAGGRLQNFQNNNNPNGLTQKQEMLA  
RSAIKYWVERHKHIVRLVSSIGDYG TALLFHMLVSTITLTLAYQATKINGLNVYAFSTVG  
YLSYTLGQVFHFCIFGNRLIESSSVMEAAAYSCQWYDGSEEAKTFVQIVCQQCQKAM SIS  
GAKFFT VSLDLFASVLGAVVTYFMVLVQLK-

>DpleOR44

MYTYFKVAVFWLNKKKILNLLKFLYCDEFRPEEKEHTEILKKSILARFITYITICVCAV  
SVAIILPITDEFILPTNVEYPYFDVYKPPYVIAYVHHIYYKPATCIIDGAMDTICAVFITFAI  
GQIDILAYNLRNFDVLAFFKKWQRDLKHHKNTSYDCKHYVNYILKKCIVHYNAIIRYVSMI  
EDAFSLASALQLMLSVMVLCLVGIQILSIENPREHPMQMAWTAVYLSMCLQE VFILCWFG  
NELILKSTELRQA AFDGPWLKMDYRTMMLIVIFLERCQRPLQVSAGKIFILSLNTYTYLIN  
WSYKAFALMTNMKK-

>DplePOR8

MLYNINIDSFFIGLLILAIAQIDILDEKLKNIATNIWDADGMVNRDIDEICIRKLNDCILHYN  
NISKFCLLVEEVFSVTLFVQFSMSSFVICVCLYRLTQPAPLPYYLFLG SYLFIMIIQIFVPCFFG  
ARIMDKSSQLSHAVYSCDWTPRSRRFKSSMRLFVERSLRPHSITGGKIFPLSLVTFTSIMNA  
AYSFFTLTNVQSNET-

>DpleOR18

MSFFKRFTDRVCESDLDFNLKYLYYVGLWPREDWPKYKQILYKIYEFKLHLLSITFIVITG  
IGTYQQRNNVIMLMTNLDKTLVGYNFVLKIFFVVIKREKLVLINEIKNSGDKVSDDRKTL  
MAIHVIFITFISTALVSAFSLLSQYKAEMTVEAWMPFDPFKDRMSLLMAAQILAICFVVPCL  
YRAFAMQGIVCSIIMYFCDQLLHLQGNLKKLGNTKHNEMQARKEFKGIVKXHVRLMRYT  
KTFTEIFKEFFLIQNLAVTIELCLNALMVTVVGLDEKTL LASFLTFLGLALFNAYIFCYLGDE  
LIILSTGISQAAYESEWTSWPIDMQDLLIIKVAQRPLKLSAGGMAIMCIQTYSQALYNAY  
SIFAVLNDVVD-

>DpleOR42

MDIPAFNDIFEQIKINFWLIGFVCVLYFATVDALYYILTSHICSQFALLSEEIQSLDENTAYSLT  
EIIKXHQHILKLSQDLEIIFRAPNLFNVLIGSLEICALGFNLTMGDWSQIPGVILFLLSVLIQIL  
MISVFGENLIRESMRVGQA AFFCKWYTM DRASKKNILMLR-

>DplePOR9

MEVGSSIIYNSRWYKMDAKSVKSLIIHSRSLKPCCKLTAFGFFDVNLKSFMSIMSTSWSYFA  
LLKTVATPTKT-

>DpleOR56c

MHISVIVFTATEYIEIWFLKNDMNMVLTNLKITLLATVSVSKITSFLIRQKDWKGILNYVND  
TDRARRSEEEESGKKEIITKYTRYSRMITFYLLLMYITVIVICQPIYKYTSEEYRHNVRN  
GTEKYDQVVSSWVPFDKNTVLGYIFACLIQSAAIYGGGWITSFDTNAIVTMVFKSEIEM  
QIIDGRLIFGTEKEPASVKEAKRRLMRCYDRYSKLIR-

>DpleOR6

MAYTGGPILISFVVDEVKRQVVCILNLLINILINSLTYFFFLKADDLPLDVYGMWENMS  
VSNQKTAMLLLQKVQIPMEFEALGGLIAGVRPMSILKTTFSYYVMLESSMESKSA-

>DpleOR35c

MPKIFGKFRPEYCDLPTMVWNVEVLLRRTLIRSYRRLNKPISWIFYILTTLGSLFYIYSYVIS  
PVWFLMVKSRETGDFTAAIVELSLMCSLTCVPIFYMKYYSSTVMDLIDEYLRNCLIVK  
GTRFEKNFLKNMKTVMKKQATVTWAVSMLNSATYLTVPLLRPGRHFTQDMYVIYGLEPML  
ESPNEFIATFMMVLSIIFALKVIVYITLFFVIVIIIGFLESQMLALSVELTNIWEDSKKFYNYIL  
QHNEGDEYEVNRNVFVTNRDLKFKHIMNINLRNKVEKELRFIFVIDFIFMMLGLVTELL  
GGLDNTLQFSFTLGIVFIDCCIGQRLIDASIAFETAVYDCKWENFNLSNQKTVLFMLQCSQ  
KTMTLTAAGIAVLNFIFLMSVLKSTYSAYTTLASFT-

>DpleOR29

MLKALLSSIEDPTRRLLGPNYWILKNMGLVLPQNPIAKVAYIVLHEIVSFFVLTQYMELYVI  
RSNLDLVLTLNLKISMLSIVCIVKANTFVIWQVQWKEVIEYVTRADQYERDNQSVERRKIID  
SYTKYCRGIVYFYCVLVFTTFTITVTNTPLMRYLSSAQYREALRNGTELFPHIFSSWMPFDK  
YNSPGSWITVIWHVCLCAYGAGIMAAAYDTVIMVIMVFFGGKLELLRERCTHIFENTEIASD  
DNQTNEKIRKLHNIHVLLMKHSRLFNSLLSPVMFLYVVMCSLMLCASAQFQTSATNTTQK  
LLMAEYLVFGIAQLFMFCWHSNDVLIKSQKVMFGPYESEWWTVNSKQARSILITVTFV  
LLSDKQFDMDNQTNQERTVPIQYVRGSRAFRQFKNPPQPHMCIQDTIKDTTEKLYINVLG  
WQKIANPKQYSDPIPLYGGMQVHQGCGPNSNKPPLLVFAVMVNPDKANGKNAANPTD  
REALVSLLCDFVEAMNPGLLLTRNPIIMKDKDITGELKDVWLAVQNKREKGLNQDVM  
YKVYDIDGIGSEDGIEDEQALRNCQQNDTGSNRIQMSDKKNTVKSSKQILKNAGQKSEF  
DSGMNNYQLNQSSRDADTTYCTPVYGVYSSRENHNQINDIQQKFASNEITKPPSSFK  
KDWQSPHGKSTTGWDEFKRSRPPKTDNKYKRSRSDKSNKPMNSGKSHYDFYPVFDNKA  
SIVASPEYLDADKNSVIEQDIKDNSKIIIDPMQKLVHSTDNKICDNKTSALSSFS

>DpleOR56b

MIFFRGELELLRRDCRSLFGTEENPVTKEEAQKRIDHCHQRHNDILKYFRLFDSCSLPIMLL  
YVIVCSVMLCATTVQLTTESSAMQKLITFYLMFGVSQVFIYCWHSNDVFYVSQDLMLGP  
YESYWWTRTLSEQKNLHLLAGQLNKQIVLTAGPFSYINLATFINILKGAYSYYTLLN-

>DpleOR60

MPESGKTKGRRFFVHYILLRFLGLGWWSPEENNTNFPGIYLYYSILTEVVWVAGFVG  
LESMDPFIHGKDLDRMLFSLAFVVTHTLIVKLYIFFFKNQIQDIIRTLEIDLHQFYQNEEK  
NRKTVRITRIFTGLFIFFGWMTIGNGNVYGHQDLRWKAQVQLNDTSLRPFRTLPQPIYIP  
WEHQNDLSFIITFLETVGLLWTGHIVMTIDTFIGSVILHMSTQFSIMQEAISTAYDRMDK  
LIKGVIECNDPVALNDCEASLGESRRDMIVRTYCTKQEIIEIALENTLKSCFRQHQMILISVD  
KFASTYSYGFMTQLLSSMAAICSMVQVSRDASSLKSISLVTSLAFFGAMIIQLALQCFTSS

ELTHQAERVSEAVMCCCKWERMPVRLRRYLVLMIARSQRPLQLTAGGFATMNNDCFLAILK  
AAYSYYAVLSQRQG-

>DplePOR20

MYPNPVYDEKRKKLIVMAILSVLPAFTLAGNDIRLRILNNDMANVVRQSILVSITFVIKFI  
SIARKDEFRSLLEEIDADYERFNGMSEQYQDLVEDTIRKTRKVEKSWCFVLLVTTASYPVL  
AGACTIYSQLFSDYPRRYMVHELKAILISEEQKYQSPYFEIVSLYTMIVIFLFIGFTGFDGM  
FSVCLLHVSLKLIYQENLRNLFNEKDIQKIKYNIGLFVKNHCGVLRLIAKIQTCEVWLV  
GIFINAVVQIGMAFTQITNQTESDINQMYYLYALATVVHIYLP CYFASDVTYNAAEIANVAY  
SSSWERVQDSKIRSSICFIIAKCQTPVRLTALDMLTFNMELFVSVGHQM-

>DpleOR8

MASAMEEIEKENVMKQQKLRVQWGIIFYAVTVYLSLIAYGVESLRKVLVEGTPPFYTVVTYI  
PDYYDESIANALRIFFYMTWLYMMLPMMATDCMPIVHLITMAHKFKTLRHYFEDIRVEF  
DENLTMGTPEAANLLTARFLNGVTMHHKLMFLAEINRVFGIIMSLQVCESSAVAVLLLLR  
LALSSHLNLTNAFMTYTFVGSFLYLLALNLWNAGEITYEASLLSNSMFYSGWHLCQLNK  
HRHKDIRRLVLVGCAQAQKPLILKAFGIQDLSYSTFVSVARMTYSIFAVFYQRN-

>DpleOR35b

MMWNVEVLLRRTLIRSNRRFDKPIPWIIYVINISTGLCYFYTYMLSTAWFVLVRCRETGDF  
ISAMVALSLTMC SITCIPKIFYMKYYQNTVMDLVDNYLHCNELIVSGTRFEKNFFANMRTV  
KKQATIAWVILTNGVVFVTLPLRPRGRHFSQDLFALYGLDPMVESPNYEKASILLTLAVYF  
SLTVMVHITLFIIVIGFLESQMLALSVELSNIWEDSKKFYNYVVLHHNESITKYELRNLFK  
NRLRDIVKFQIMIVSLRNKVEKELRFIFVND FIFMIFALVSELVGGLENTMVQMPFTFGMV  
IDCFIQRLIDASKAFERAAYGSKWENFNLSNQKT VLFMLQCSQKTMTLTAGGIAVLDFIY  
LMSVLKSTYSAYTTLKSSA-

>DpleOR35a

MTVSKSPVSGYLNKMYQYTENIFPETGDIRRAAVELSLATASGTCVAQFLYMKLCSNRLM  
DIVDEYLSCDKLVRGTRFEKNLSWKLREIKKRALVVWIVLIGNAALYVTVPIFIPGRHFTE  
DLFVLYGLDPMVESPNYEKASILLTLAVYFSLTVMVHITLFIIVIGFLESQMLALSVELSNI  
WEDSKKFYNYVVLHHNESITKYELRNLFKNRLRDIVKFQIMIVSLRNKVEKELRFIFVND  
FIFMIFALVSELVGGLENTMIQMPFTFGMV FIDCFIQRLIDASKAFERAAYGSKWENFNLS  
NQKTKKYEV LGNNTTYLKEDLHLVCYRNVQNSRKN SNEDDRQEGEWENFNLSNQKT VLF  
FMLQCSQKTMTLTAAGIAVLNFIFLMSVLKSTYSAYTTLASFT-

>DpleOR27

MAILFVLSQYVELYFIRNDLAMALKNLSVTMLSTVCVVKAGTFIIWQKYWKDIFNYVSKL  
EKNQLYKPDYLTKN TIRKYTEYSRFVTYFYWTLV TATVFSLILAPLASYLSSFQNKELGDS  
GASSYPEIMSSWVPFDKTQGGCYLVLTLIHVLCIFYGGGIVANYDSNAVVL MCFFAGQLKI  
LKINCERLFGNGEEIAGTTSMQQIWIAEYLI ALVAQLFLYCWHSKVLHVMNIFIH-

>DpleOR56a

MILYVLVCSVMMCCSVVQLSLGHLSTSEKLWVIEFTTALITQLFLYCWHSNEITYESNLVD  
RGVYASNWWRGDVKVKRQILILAGKLAPSLILKAGPVTTLSMATFISILKGSYSFYTLVTQ  
MQENQI-

>DplePOR12a

MAKIYKIKRYKPVFINLISELREMPEDNVTDEEQAISSALNRLRLVTKTYFSCNSILGLIF  
TLPSIINLIKPLFGIEAPRILPFFYWLPDPYQEVIFEVVVIVQNSHCFLSAAFMLAGDLLFFS  
FLSNITTQFSL LAVRIKKMFYAPIDGQLPESYPLGCSNEGILLNLSQDTSTNRSKVKEEELK

EIIKRHRSLIRLSNDVENMYSFLLVNFLNSSIIICFLFCCAUSTKTVKNY-

>DplePOR12b

MMPCVGYLFVAIAKFYKIERYKPVFINLISELREMWPEDNVTDEEQVISSALNRLRLVTKT  
YFYCNLILAFIFTLPANINLIKSLFGIEVPRILPFVYWMPFDPSKKVVFVVLIVQNIHCFLSA  
AYMLAGDLLFFVFLSHITTQFSL LAVRIQKMFYVPIDGQLPESYPLGYYNKENS LNPNQD  
TANNRCKVEEEELKNIVIRHKALIRVVILIDHFQSTGVGEALYNSAWYVSSNSIKKSILIMIH  
RSQRRVHITTFGFSTVSMECYATVSVNITAVTLH-

>DpleEOR30

MVIVGITVIFKHSILINCNSIKQLLKILDEYKAAELYGEREKDILKSAMSGVKICRFWL  
SATLTCFMFPAKAIEMGNLYMRGEFKLVPMFDFTYPNFIEVHKESTVAYTVLFLMCLSF  
DLSLSIYIGFDPLVPIFMLHTCGQLELISNKLNVFSKDASRQDIVDDLKRINSLRNREISLEFI  
FFFSGACLHFYMPCYYSNLLMEKSESLRNAIYFSGWESRRDIGIRKTILLMLTRTYVPLGIK  
TVFYPLICLDTFAEMVRQAYGIYNIMNAAWG-

>DpleOR1

MRVLKGLKLVIFCYPHIEGELQSKYVILGKIWVTLLSIATLSGQILYLYHKTGKIIFLKL  
GHTYITTAMNSVVS DPDALTRYGILTFVVEQLIQVSAFEILETMSSKLEKAVYYLPWECMN  
V SQRRVVLIMLMAQRGGTVKALDMVNVGVQTMAAVGLKHKY-

>DpleEOR15

MAIFIVNFIIYNSLLILNLVFTPRKIEYMIREVIFLFTEVAVTGKVLMMFKRKKILSVFDILN  
CEVFKGEDDISRRIVESHVSKYKTYWSLYAILS NFAYSSQVFPVPIVYFIFNTNIKLPICKYYF  
LDEEYVRRYFVFLYLYQSLGIYGHM QYVNVNIDALISGLLILAI AQVKVLKYELKNIKPDSPL  
KDKRETERSQIFKLHKHLKHYEELLYCSGIQDIVGLSMFVQFGIASIIICVVL SGLRFTASV  
EALMFMVTYLFTMILQIYVPAWLG TQLNYESQELVFAAYSSQWIRRSEKFKRSLKLFMER  
ANTNIVLTGWRIFFPLSLDTFTSVITRNI-

>DplePOR18

MIYPNRENIQTRFKVIFS VIAINGVMLYWFLYLWKICCNHDMY NVSRNLTIGILVTLFFFK  
SFYVTNKTHRFAQLLEKISNDLLKGNMDDSYQEIYEKYIKLGKLGQTCWIFIPILLTSQFP  
IYAGVSTIYESLKTDTGQKYM IHEMDLKYLEDKQYDSPIYELTFAYHLITCLT LSPNFAGFD  
GSFCIATNHLRLKLLAHKVERAFKDAKNKWELHTMIKETIRDHQEALS FYEDLQEVY  
G SWLFTVFAVTSLLISLNIYQIYLSERVDPKYAIFAISGIIHMFAPCYFASNLMKTSEELSLDLY  
SVEWEVWAYPAVTKQLIFMIAKSQQTILTGNGIVYFNMQLFISLPPTIAKVS VDRGLPLPR  
SAWGVPPPAPPTFARCSAQPM TARPEPAKGFYK-

>DpleOR54

MSLIDRFKTKLV DYEKTFMDYRIESIILLNFIPSMAGFSILNKKNSVIFWIVHFFLVLYVYV  
LGSIMYQVNVADGPIDLIKSYVNLTLVILIINNSYWFIVKRATLTKLMENVIENDTQSHQLD  
FLKPKHTKLLRTIKIIVYIFYAFNILDVIFVYIPRRIDVTNEYYSNVACVGMKPLTHFPKKQL  
CQLVLFATEISICTVVLNYQALIFFLISHTAAMYRLLCEEIFALDDDNMDTATVKKRLVVLIG  
RHTLTLTITKTIKDLYSMPIGINFGSNAICILSFALPWEEWVNLSPVYIYCFVFLYCHLCQ  
MLINASEQFEYAVYSCGW EKFDLKEQKTAYVMLLQAQKPVTLAADIVPVNIYTFATTMQ  
AMFKFITVFKF-

>DpleOR16

MADIKSEDLFLNRAKFVMKLLGVWIIYVQVWGDLEAVSQASYLLFTQASLCFKVTVFQV  
NVKSLRELLKRMNDKIFLPQSSKQNRILSLQAKRIKRLLLAFMISSQTTCGLWALKPLFDD  
PGSRKFPFDMWMPVTPQSSPHYEFGYAFQLLTICMSAYMYFGVDSVALSMVIFACGQIDII

KDKILKINSIRKESGDEMSRRIVASDNNKKLIECIRQHQAVVLFKELLENTYHTYLLFQLVG  
SVGLICMSALRILVVEWRSIQFFSIVTYLSVMISQLFVCCWCGHELTATSEDLHTVFYRSTW  
YEQDVRFRQCLCFAMMRLGQPLVLRAGHYIPLSRQTFVSILRMSYSYFAVLNQTK-

>DplePOR10

MGIWLSSNNYVILRDLYKSLIMSTQYSFLLFEIFYVFVWGDIDEMSEASYLLFTQTSVCY  
KASVFIINKKNLIVLLVSMKAKIFEPQSSIHYGILYRNARVVKNLCAVFLMSAITTCSLWTIM  
PLFDAAETRFFPFKIWMPVDPDRSPQYELGYIQVMSIYISALLFVAVDNITLGMIMFGCA  
QLEIVIDKIKQLKNASSKHNKERRKLICENKLLDECIKQHQS VIRFIETLENTYHANIFFQL  
TATVGIICIGLRISIVEPRSVQFFSMLNYMVTMLSQFLYCWCGSHLTTKSEELREWLYQCP  
WYNQDPRFRKSVFIAMERMKRPIIFKAGHYIPLSRPTFVSVLRLSYSYFAVLNQAKNK-

>DpleOR63

MPFPYSQTFLTSSYSLLFLLPQQLGLPQTSTSLMLQMYLGDGDYFPLSSPYDTSVSPAYE  
LTYMHQTLSIMIGAVLNISKDSLVTLLAQTRCRLGLVGLALTTVCSGLLPEKWGRKSLQN  
PEISVLMGNVLEEATAKDINKCGKMLDTPAMKKAIVLEQKMLEVQKEKQKPVKYKEDII  
MGLIVQNINFSRLRSLTALKIAGLWAPDGMQTRKKALYCYTFVLLMFLGTFIILQ MIDLY  
LIWGNLSLMTGTALVFTNISQVTKIINLLARRKHIEFLIKDTNDGLEVMTSSRARELIKSC  
DHETRNQQVIFLLVTFVTTVGWATITDKNGLPLPAWYPYDTSVSPAYELTYTHQTLSIMIVA  
VLNISKDSLVTLLAQTRCRLGLVGLALTTVCSDLVPEEDNTYSGGYSNKLFTAQQEMIAK  
NRLRICVQQHQRALRAAKILQECFSVPTFAQFSVSLIICVTAFAQVLSSEELARRAYEMPWY  
MCSVSVRRSIQIMMIRCHRIVKFTAGGFTTSLATFTAVIKLSYSMLTLLQQVNEKI-

>DpleOR64

MCKRCEDLKIQSTKVGEAVYFSSWEEVVVTIPRVRTTVLLILLRAHKPIGLTGGGMYELSL  
EAYGNVRVLEKKYIF-

>DpleOR1b

MVAEILKRFTSKLSSTFGPVLLHYYIFHIVTLCILLECSKMDPDALTRYGILTFLVVEQLIQ  
VSVAFEILETMSSKLEKAVYYLPWECMNVSQRRVVLIMLMQAQRGGTVKALDMVNVGV  
QTMAAVGLKHKY-

>DpleOR58

MSLLFTHIKSSLKFTNVIFTVFGVWPPPGLNDLARRVYSLYSFLLLFLTIGVYIIIQTGDLVQ  
VWGDLTLMTASVFMFLTNIAYAIFIALSINA AVNLCCDVLVATLIAQCRCRLRLIAQSLRT  
LCDDVDVDKKGRITADSEKVVSSRVGIVMRHQLVLAQVEQLQCFSVPILGQFAVASFII  
CVTAYQMAFVTNLYRLISMASFEIAVTIQVYIYCVAGTNLTIDSDEVSRAAYECPWYEFPAS  
IRRLLLIVMVRCKRATVITVAGIVEISLDTFMSLTSTRCVKTLTDLHSQI-

>DpleOR1a

MRVLKLGKLVIFCYPHIEGELQSKYVILGKIWVTLLSIATLSGQILYLYHKTGKIIFLKLGH  
YITTAMNSVVSDDPDALTRYGILTFLVVEQLIQVSVAFEILETMSSKLEKAVYYLPWECMN  
VVSQRRVVLIMLMQAQRGGTVKALDMVNVGVQTMAAVGLKHKY-

>DmelOR

MQDQLDHELERIDKLPKLGLLWVEYSAYALGVNIAPRKRSSKYCRLTRILVLIVNLSIIYSL  
VAFIMENY MISFETYVEAVLLTFQLSVGVVKMFHFQNKVESCSQLVFSTETGEVLKSLGLF  
QLDLPRKKELLSSVSLILLNNWMIIDRQVMFFFKIVCMPVLYYCVRPYFYIFDCYIKDKD  
TCEMTLTYPAIVPYLQLGN YEFPSYVIRFFLLQSGPLWCFFAVFGFNSLFFVLTRYESGLIKV  
LRFLVQNSTSDILVPKDQRVKYLQCCVRLFARISSHHNQIENLFKYIILVQCSVSSILICMLLY  
KISTVLEVGWVWMMGMIMVYFVTIALEITLYNVSAQKVESQSELLFHDWYNCSWYNESRE

FKFMIKMMLLFSRRTFVLSVGGFTSLSHKFLVQVFRLSANFFLLLRNMNNK-

>DmelOR1a

MSKLIIEVFLGNLWTQRFTFARMGLDLQPDKKGNVLRSPLLY CIMCLTTSFELCTVCAF MV  
QNRNQIVLCSEALMHGLQMVSSLLKMAIFLAKSHDLVDLIQQIQSPFTEEDLVGTEWRSQ  
NQRGQLMAAIYFMMCAGTSVSFLLMPVALTMLKYHSTGEFAPVSSFRVLLPYDVTQPHV  
YAMDCCLMVFLSFFCCSTTGVDTLYGWCALGVSLQYRRLGQQLKRIPSCFNPSRSDFG  
SGIFVEHARLLKIVQHFNYSFMEIAFVEVVIICGLYCSVICQYIMPHTNQNF AFLGFFSLVVT  
TQLCIYLF GAEQVRLEAERFSRLLYEVIPWQNLPPKHRKLF LFPPIERAQRETVLGAYFFELG  
RPLLWIFRTAGSFTTLMNALYAKYETH-

>DmelOR2a

MEKQEDFKLNTHSAVYYHWRVWELTGLMRPPGVSSLLYVVYSITVNLVVTVLFPLSLLAR  
LLFTTNMAGLCENLTITDIVANLKFANVYMVRKQLHEIRSLRLMDARARLVGDPEEIS  
ALRKEVNIAQGTFRTFASIFVFGTTLSCVRVVVRPDRELLYPAWFGVDWMHSTRNYVLINI  
YQLFGLIVQAIQNCASDSYPPAFLCLLTGHMRALELRVRRIGCRTEKSNKGQTYEAWREEV  
YQELIECIRDLARVHRLREIIQRVLSVPCMAQFVCSAAVQCTVAMHFLYVADDHDHTAMII  
SIVFFSAVTLEVFVICYFGDRMRTQSEALCDAFYDCNWIEQLPKFKRELLFTLARTQRPSLI  
YAGNYIALSLETFEQVMRFTYSVFTLLLRK-

>DmelOR7a

MAVSTRVATKQEVPESTRRAFRNLFNCFYALGMQAPDGSRPTTSSTWQRIYACFSVVMYV  
WQLLLVPTFFVISYRYMGGMEITQVLTSAQVAIDAVILPAKIVALAWNPLLRRAEHLAA  
LDARCREQEEFQLILDVAVRFCNYLVWFYQICYAIYSSSTFVCAFLGQPPYALYLPGLDWQ  
RSQMQFCIQAWIEFLIMNWTCLHQASDDVYAVIYLYVVRIQVQLLARRVEKLGTDSDGQV  
EIYDPERRQEEHCAELQRCIVDHQTMLQLLDCISPVISRTIFVQFLITAAIMGTTMINIFAN  
TNTKIASIYLLAVTLQTAPCCYQATSLMLDNERLALAIQCQWLGQSARFRKMLLYYLHR  
AQQPITLTAMKLF PINLATYFSIAKFSFSLYTLIKGMNLGERFNRTN-

>DmelOR9a

MSDKVKGKKQEEKDQSLRVQILVYRCMGIDLWSPTMANDRPWLTFVTMGPLFLFMVPM  
FLAAHEYITQVSLSDTLGSTFASMLTLVKFLLFCYHRKEFVGLIYHIRAILAKEIEVWPDA  
REIIEVENQSDQMLSLTYTRCFGLAGIFAALKPFVGIILSSIRGDEIHLELPHNGVYPYDLQV  
VMFYVPTYLWNVMASYSAVTMALCVDSLLFFFTYNVCAIFKIAKHRMIHLPAVGGKEELE  
GLVQVLLHQLKGLQIADHIADKYRPLIFLQFFLSALQICFIGFQVADLFPNPQSLYFIAFVGS  
LLIALFIYSKCGENIKSASLDFGNGLYETNWTDFSPPTKRALLIAAMRAQRPCQMKGYFFE  
ASMATFSTIVRSASVSYIMMLRSFNA-

>DmelOR10a

MSEWLRFLKRDQQLDVYFFAVPRLSLDIMGYWPGKTGDTWPWRSLIHFAILAIGVATELH  
AGMCFDRQQITLALETLC PAGTSAVTLLKMFLMLRFRQDLSIMWNRLRGLLFDPNWERP  
EQRDIRLKHSAMAARINFWPLSAGFFTCTTYNLKPILIAMILYLQNR YEDFVWFTPFNM TM  
PKVLLNYPFFPLTYIFIAYTGYVTIFMFGGCDGFYFEFCAHLSALFEVLQAEIESMFRPYTD  
HLELSPVQLYILEQKMRSVIIRHNAIIDLTRFFRDYTIITLAHFVSAAMVIGFSMVNLLTLG  
NNGLGAMLYVAYTVAALSQLLVYCYGGTLVAESSTGLCRAMFSCPWQLFKPKQRRVLQ  
LILRSQRPVSMVPPFFSPLATFAAILQTSGSIIALVKSFQ-

>DmelOR13a

MFYSYPYKALSFPICVWLKLNKSWPLTESSRPWRSQSLLATAYIVWAWYVIASVGITISY  
QTAFLNNSLDIIITENCCTTFMGVLNFVRLIHLRLNQRKFRQLIENFSYEIWIPNSSKNNV

AAECRRRMVTFSIMTSLLACLIIMYCVLPLVEIFFGPAFDAQNKPFPYKMIFPYDAQSSWIR  
YVMTYIFTSYAGICVVTTLFAEDTILGFFITYTCGQFHLLHQRIAGLFAGSNAELAESIQLER  
LKRIVEKHNNIISFAKREDFFNPIILLANLMISSVLICMVGFQIVTGKNMFIGDYVKFIIYISS  
ALSQLYVLCENGDALIKQSTLTAQILYECQWEGSDRIEIQSFTPTTKRIRNQIWFILCSQQP  
VRITAFKFSTLSLQSFTAILSTISISYFTLLRSVYFDDEKKLD-

>DmelOR19a

MDISKVDSTRALVNHWRIFRIMGIHPPGKRTFWGRHYTAYSMVWNVTFHICIWVSFSVNL  
LQSNSLETFCESLCVTMPHTLYMLKLINVRRMRGQMISSHWLLRLLDKRLGCDDERQIIM  
AGIERAEFIFRTIFRGLACTVVLGIIYISASSEPTLMYPTWIPWNWRDSTSAYLATAMLHTTA  
LMANATLVNLSSYPGTYLILSVVHTKALALRVSKLGYGAPLPAVRMQAILVGYIHDHQIIL  
RLFKSLERSLSMTCFLQFFSTACAQCTICYFLLFGNVGIMRFMNMLFLLVILTETLLLCYT  
AELPCKEGESLLTAVYSCNWLSQSVNFRLLLLMLARCQIPMILVSGVIVPISMKTFTVMIK  
GAYTMLTLLNEIRKTSLE-

>DmelOR19b

MDISKVDSTRALVNHWRIFRIMGIHPPGKRTFWGRHYTAYSMVWNVTFHICIWVSFSVNL  
LQSNSLETFCESLCVTMPHTLYMLKLINVRRMRGEMISSHWLLRLLDKRLGCADERQIIM  
AGIERAEFIFRTIFRGLACTVVLGIIYISASSEPTLMYPTWIPWNWKDSTSAYLATAMLHTTA  
LMANATLVNLSSYPGTYLILSVVHTKALALRVSKLGYGAPLPAVRMQAILVGYIHDHQIIL  
RLFKSLERSLSMTCFLQFFSTACAQCTICYFLLFGNVGIMRFMNMLFLLVILTETLLLCYT  
AELPCKEGESLLTAVYSCNWLSQSVNFRLLLLMLARCQIPMILVSGVIVPISMKTFTVMIK  
GAYTMLTLLNEIRKTSLE-

>DmelOR22

MLSKFFPHIKEKPLSERVKS RDAFIYLDRLMWSFGWTEPENKRWDLHYKLWSTFVTLIFI  
LLPISVSVEYIQRFKTF SAGEFLSSIQIGVDMYGSSFKSYLTMMGYKKRQEAKMSLDELDK  
RCVCDEERTIVHRHVALGNFCYIFYHIA YTSFLISNFLSFIMKRIHAWRMYFPYVDPEKQFY  
ISSIAEVILMGWAVF MALCTDVCPLISMLIARCHITLLKQRLRNLRSEPGRTEDEYKELAD  
CVRDHRLILDYVDALRSVFSGTIFVQFLLIGIVLGLSMINIMFFSTLSTGVAVVLFMSCVSM  
QTFPFCYLCNMIMDDCQEMADSLFQSDWTSADRRYKSTLVYFLHNIQQPIILTAGGVFPIS  
MQTNLNMVLAFTVVTIVKQFNLAERFQ-

>DmelOR22a

MLSKFFPHIKEKPLSERVKS RDAFIYLD RVMWSFGWTEPENKRWILPYKLWLAFVNIVMLI  
LLPISISIEYLHRFKTF SAGEFLSSLEIGVNMYGSSFKCAFTLIGFKKRQEAKVLLDQLDKRC  
LSDKERSTVHRYVAMGNFFDILYHIFYSTFVVMNFPYFLLERRHAWRMYFPYIDSDEQFYI  
SSIAECFLMTEAIYMDLCTDVCPLISMLMARCHISLLKQRLRNLRSKPGRTEDEYLEELTEC  
IRDHRLLLDYVDALRPVFSGTIFVQFLLIGIVLGLSMINLMFFSTFWTG VATCLFMFDVSM  
ETFPFCYLCNMIIDDCQEMSNCLFQSDWTSADRRYKSTLVYFLHNLQQPITL TAGGVFPIS  
MQTNLAMVLAFTVVTIVKQFNLAERFQ-

>DmelOR22b

MLSQFFPHIKEKPLSERVKS RDAFVYLDRVMWSFGWTVPENKRWDLHYKLWSTFVTLIFI  
ILLPISVSVEYIQRFKTF SAGEFLSSIQIGVNMYGSSFKSYLTMMGYKKRQEAKMSLDEL  
KRCVCDEERTIVHRHVALGNFCYIFYHIA YTSFLISNFLSFIMKRIHAWRMYFPYVDPEKQF  
YISSIAEVILRGWAVFMDLCTDVCPLISMVIARCHITLLKQRLRNLRSEPGRTEDEYKELA  
DCVRDHRLILDYVDALRSVFSGTIFVQFLLIGIVLGLSMINIMFFSTLSTGVAVVLFMSCVS  
MQTFPFCYLCNMIMDDCQEMADSLFQSDWTSADRRYKSTLVYFLHNLQQPIILTAGGVFP



ISMQTNLNMVKLAFTVVTIVKQFNLAKEFQ-

>DmelOR22c

MTDSGQPAIADHFYRIPRISGLIVGLWPQRIRGGGGRPWHAHLLVFVAFAMVVVGAVGEV  
SYGCVHLDNLVVALEAFCPGTTKAVCVLKLWVFFRSNRRWAELVQRLRAILWESRRQEA  
QRMLVGLATTANRLSLLLSSGTATNAFTLQPLIMGLYRWIVQLPGQTELPFNILPSFAVQ  
PGVFPLYVLLTASGACTVFAFSFVDGFFICSCLYICGAFRLVQQDIRRIFADLHGDSVDVFT  
EEMNAEVRHRLAQVVERHNAIIDFCTDLTRQFTVIVLMHFLSAAFVLCSTILDIMLNTSSLS  
GLTYICYIIAALTQLFLYCFGGNHVSESSAAVADVLYDMEWYKCDARTRKIVILMILRRSQR  
AKTIAVPFFTPSLPALRSILSTAGSYITLLKTFL-

>DmelOR24

MDSFLQVQKSTIALLGFDLFSENREMWKRPYRAMNVFSIAAIFPFILAAVLHNWKNVLLL  
ADAMVALLITILGLFKFSMILYLRDFKRLIDKFRLLMSNEAEQGEEYAEILNAANKQDQR  
MCTLFRTCFLAWALNSVLPVLRMGLSYWLAGHAPELPPFCLFPWNIHIIRNYVLSFIWS  
AFASGTVLPAVSLDTIFCSFTSNLCAFFKIAQYKVVRFKGGSLKESQATLNKVFALYQTSL  
DMCNDLNQCYQPIICAQFFISSLQLCMLGYLFSITFAQTEGVYYASFIATIIIQAYIYCYCGE  
NLKTESASFEWAIYDSPWHESLGAGGASTSICRSLLISMMRAHRGFRITGYFFEANMEAFS  
SIVRTAMSYYTMLRSFS-

>DmelOR24a

MLPRFLTASYPMERHYFMVPKFALSLIGFYPEQKRTVLVKLWSFFNFFILTYGCYAEAYYGI  
HYIPINIATALDALCPVASSILSLVKMVAIWVYQDELRS LIERVRFLTEQQKSKRKLGYKKR  
FYTLATQLTFLLLCCGFCTSTSYSVRHLIDNLRTHGKDWIYETPFKMMFPDLLRLPLYPI  
TYILVHWHGYITVVCVFGADGFFLGFCLYFTVLLLCLQDDVCDLLEVENIEKSPSEAEEAR  
IVREMEKLVDRHNEVAELTERLSGVMVEITLAHFVTSSLIIGTSVVDILLFSGLGIIVYVYVY  
CAVGVEIFLYCLGGSHIMEACSNLARSTFSSHVYGHVSVRVQKMTLLMVARAQRVLTIKIPF  
FSPSLETLSILRFTGSLIALAKSVI-

>DmelOR30a

MELKSM DPVEMPIFGSTLKL MKFWSYLFVHNWRRYVAMTPYIIINCTQYVDIYLS TESLD  
FIIRNVYLAVLFTNTVVRGVLLCVQRFSYERFINILKSFYIELLQSDDP IINILVKETTRLSVLI  
SRINLLMGCCCTCIGFVTYPIFGSERVLPYGYMLPTIDEYKYASPYEIFFVIQAIMAPMGCC  
MYIPYTNMVVFTFLFAILMCRVLQHKLRSLKLEKNEQVRGEIWC IKYQLKLSGFVDSMN  
ALNTHLHLVEFLFCFGAMLCVLLFSLIIAQ TIAQTVIVIAYMVMIFANSVLYYVANELYFQS  
FDIAIAAYESNWMDFD VDTQKTLKFLIMRSQKPLAILVGGTYPMNLKMLQSLLNAIYSFFT  
LLRRVYG-

>DmelOR33a

MDSRRKVRSENLYKTYWLYWRLLGVEGDYPFRRLVDFTITSFITILFPVHLILGMYKKPQI  
QVFRSLHFTSECLFCSYKFFCFRWKLKEIKTIEGLLQDLDSRVESEEERNYFNQNPSRVARM  
LSKSYLVAAISAITATVAGLFSTGRNLMYLGWFPYDFQATAAIYWISFSYQAIGSSLLILEN  
LANDSYPPITFCVVS GHVRLIMRLSRIGHDVKLSSSENTRK LIEGIQDHRKLMKIIRLLRST  
LHLSQLGQFLSSGINISITLINILFFAENNFAMILYAVFFAAMLIELFPSCYYGILMTMEFDKL  
PYAIFSSNLKMDKRYNRSLIILMQTLV PVNIKAGGIVGIDMSAFFATVRMAYSFYTLALS  
FRV-

>DmelOR33b

MDLKPRVIRSEDIYRTYWLYWHLLGLESNFFLNRLLDLVITIFVTIWYPIHLILGLFMERSL  
GDVCKGLPITAACFFASFKFICFRFKLSEIKEIEILFKELDQRALSREECEFFNQNTREANFI

WKSFIVAYGLSNISAIASVLFGGGHKLLYPAWFPYDVQATELIFWLSVTTYQIAGVSLAILQN  
LANDSYPPMTFCVVAGHVRLAMRLSRIGQGPEETIYLTGKQLIESIEDHRKLMKIVELLR  
STMNISQLGQFISSGVNISITLVNILFFADNNFAITYYGVYFLSMVLELFPCCYYGTLISVEM  
NQLTYAIYSSNWMSMNRSYSRILLIFMQLTLAEVQIKAGGMIGIMNAFFATVRLAYSFFT  
LAMSLR-

>DmelOR33c

MVIIDSLSFYRPFWICMRLLVPTFFKDSSRPVQLYVVLLHILVTLWFPLHLLLHLLLPLSTAE  
FFKNLTMSLTCVACSLKHVAHLYHLPQIVEIESLIEQLDTFIASEQEHRYYRDHVHCHARRF  
TRCLYISFGMIYALFLFGVQVISGNWELLYPAYFPDLESNRFLGAVALGYQVFSMLVEG  
FQGLGNDTYTPLTCLLAGHVHLWSIRMGQLGYFDDDETUVNHQRLLDYIEQHKLVRFH  
NLVSRITISEVQLVQLGGCGATLCIIVSYMLFFVGDITISLVYYLVFFGVVVCVQLFPSCYFASE  
VAEELERLPYAISSRWYDQSRDHRFDLLIFTQLTLGNRGWIIKAGGLIELNLNAFFATLKM  
AYSFAVVVRAKGI-

>DmelOR35a

MVRYVPRFADGQKVKLAWPLAVFRLNHIFWPLDPSTGKWGRYLDKVLAVAMSLVFMQH  
NDAELRYLRFEASNRNLDAFLTGMPTYLILVEAQFRSLHILLHFEKLQKFLEIFYANIYIDPR  
KEPEMFRKVDGKMIINRLVSAMYGAVISLYLIAPVFSIINQSKDFLYSMIFPDSPLYIFVPL  
LLTNVWVGIVIDTMMFGETNLLCELIVHLNGSYMLLKRDLQLAIEKILVARDRPHMAKQL  
KVLITKTLRKNVALNQFGQQLAQYTVRVFIMFAFAAGLLCALSFKAYTNP MANYIYAIW  
FGAKTVELLSLQIGSDLAFTTDSLSTMYLTHWEQILQYSTNPSENRLKLNLALEMNS  
KPFYVTGLKYFRVSLQAGLKILQASFSYFTFLTSMQRRQMSN-

>DmelOR42a

MDLRRWFPTLYTQSKDSPVRSRDATLYLLRCVFLMGVRKPPAKFFVAYVLWSFALNFCST  
FYQPIGFLTGYISHLSEFSPGEFLTSLQVAFNAWSCSTKVLIVWALVKRFDEANNLLDEMDR  
RITDPGERLQIHRAVSLSNRIFFFMAVYVMVYATNTFLSAIFIGRPPYQNYYPFLDWRSSTLH  
LALQAGLEYFAMAGACFQDVCVDCYPVNFVLVLAHMSIFAERLRLRGTYPYESQEKY  
ERLVQCIQDHKVLRFVDCLRPVISGTIFVQFLVVGLVLGFTLINIVLFANLGSAAALSFMA  
AVLLETTPFCILCNYLTEDCYKLADALFQSNWIDEEKRYQKTLMYFLQKLQQPITFMAMN  
VFPISVGTNISVTKFSFSVFTLVKQMNISEKLAKSEMEE-

>DmelOR42b

MVFELIRPAPLTEQKRSRDGCIYLYRAMKFIGWLPPKQGVRLRYVYLTWTLMTFVWCTTYL  
PLGFLGSYMTQIKSFSPGEFLTSLQVCINAYGSSVKVAITYSMLWRLIKAKNILDQLDLRCT  
AMEEREKIHLVVARSNHAFLIFTFVYCGYAGSTYLSSVLSGRPPWQLYNPFIDWHDGTLKL  
WVASTLEYMVMMSGAVLQDQLSDSYPLIYTLILRAHLDMLRERIRRLSDENLSEAESYEEL  
VKCVMDHKLILRYCAIIPVIQGTIFTQFLIGLVGLFTLINVFFFSDIWTGIASFVITILLQ  
TFPFCYTCNLIMEDCESLTHAIFQSNWVDASRRYKTTLLYFLQNVQQPIVFIAGGIFQISMSS  
NISVAKFAFSVITITKQMNIAADKFKTD-

>DmelOR43b

MFGHFKLVPAPISEPIQSRDSNAYMMETLRNSGLNLKNDFGIGRKIWRVFSFTYNMVILP  
VSFPINYVIHLAEFPPELLLQSLQLCLNTWCFALKFFTLIVYTHRLELANKHFDELDKYCV  
KPAEKRKVRDMVATITRLYLTFFVVVYLYATSTLLDGLLHHRVPYNTYYPFINWRVDRTQ  
MYIQSFLEYFTVGYAIYVATATDSYPVIYVAALRTHILLKDRIIYLGDPSSNEGSSDPSYMFK  
SLVDCIKAHRTMLNFCDAIQPIISGTIFAQFIICGSILGIIMINMVLFADQSTRFGIVIYVMAVL  
LQTFPLCFYCNAIVDDCKELAHALFHSAWVQDKRYQRTVIQFLQKLQQPMTFTAMNIF

NINLATNINVAKFAFTVYAIASGMNLDQKLSIKE-

>DmelOR45a

MDASYFAVQRRALEIVGFDPSTPQLSLKHPIWAGILILSLISHNWPMVVYALQDLSDLTRLT  
DNFAVFMQGSQSTFKFLVMMAKRRRIGSLIHLHKLNQAASATPNHLEKIERENQLDRYV  
ARSFRNAAYGVICASAIAPMLLGLWGYVETGVFTPTTPMEFNFWLDERKPHFYWPIYVW  
GVLGVA AAAWLAIATDTLFSWLTHNVVIQFQLLELVLEEKDLN GGDSRLTGFVSRHRIAL  
DLAKELSSIFGEIVFVKYMLS YLQLCMLAFRFSRSGWSAQVPFRATFLVAIIIQLSSYCYGG  
EYIKQQLAIAQAVYGGINWPMPKRRRLWQMVMIRAQRPAKIFGFMFVVDLPLLLWVI  
RTAGSFLAMLRTFER-

>DmelOR45b

MYPRFLSRNYPLAKHLFFVTRYSGLLGLRFGKEQSWLHLLWL VFNFNLAHCCQAEFVF  
GWSHLRTSPVDAMDAFCPLACSFTTLFKLGWMWWRREQEVADLMDRIRLLIGEKEKREDS  
RRKVAQRSY YLMVTRCGMLVFTLGSITTGAFVLRSLWEMWVRRHQEFKFDMPFRMLFH  
DFAHRMPWFVVFYLYSTWSGQVTVYAFAGTDGFFFFGFTLYMAFLLQALRYDIQDALKPIR  
DPSLRESKICQRLADIVDRHNEIEKIVKEFSGIMAAPT FVHFVSASLVIATSVIDILLYSGYN  
IIRYVVYTFVSSAIFLYCYGGTEMSTESLSLGEAA YSSAWYTWDRRETRRRVFLIILRAQRPI  
TVRVPFFAPSLPVFTSVIKFTGSIVALAKTIL-

>DmelOR46a-A

MSKGVEIFYKGQKAFLNILSLWPQIERRWRIIHQVNYVHVIVFWVLLFDLLLVLHVMANL  
SYMSEVVKAIFILATSAGHTTKLLSIKANNVQMEELFRRLDNEEFRPRGANEELIFAAACE  
RSRKL RDFYGALSFAALSMILIPQFALDWSHLPLKTYNPLGENTGSPAYWLLYCYQCLALS  
VSCITNIGFDSLCSLFIKLCQLDILAVRLDKIGRLITTSGGTVEQQLKENIRYHMTIVELSK  
TVERLLCKPISVQIFCSVLVLTANFYAIAVLSDERLELFKYVTYQACMLIQIFILCY YAGEVT  
QRSLDLPHELYKTSWVDWDYRSRIALLFMQRLHSTLRIRTLNPSLGFDLMLFSSIVNCSY  
SYFALLKRVNS-

>DmelOR46a-B

MVTEDFYKYQVWYFQILGVWQLPTWAADHQRRFQSMRFGFILVILFIMLLLFSFEMLNNI  
SQVREILKVF FATEISCMAKLLHLKLSRKL AGLVDAMLSPEFGVKSEQEMQMLELDR  
VAVVRMRNSY GIMSLGAASLILVPCFDNFGELPLAMLEVCSIEGWICYWSQYLFHSICLLP  
TCVLNITYDSVAYSLLCFLKVQLQMLVLRLEKLGPIEPQDNEKIAMELRECAAYNRIVR  
FKDLVELFIKPGSVQLMCSVLVLSNLYDMSTMSIANGDAIFMLKTCIYQLVMLWQIFIC  
YASNEVTVQSSRLCHSIYSSQWTGWNRRANRRIVLLMMQRFNSPMLLSTFNPTFAFSLEAF  
GSIVNCSYSYFALLKRVNS-

>DmelOR47b

MNDSGYQSNLSLLRVFLDEFRSVLRQESPGLIPRLAFY YVRAFLSLLCQYPNKKLASPLY  
RWINLFIMCNVMTIFWTMFVALPESKNVIEMGDDLWISGMALVFTKIFYMHLRCDEIDE  
LISDFEY YNREL RPHNIDEEVLGWQR LCVIESGLYINCFCLVNFSSAAIFLQPLLGEGLPF  
HSVYPFQWHRLDLHPYTFWFLYIWQSLTSQHNLMSILMVD MVGISTFLQTALNLKLLCIEI  
RKLGDMEVSDKRFHEEF CRVVRFHQHIIKLVGKANRAFNGAFNAQLMASFSLISISTFETM  
AAA AVDPKMAAKFVLLMLVAFIQLSLWCVSGTLVYTQSVEVAQA AFDINDWHTKSPGIQ  
RDISFVILRAQKPLMYVAEPFLPFTLGT YMLVLKNCYRLLALMQESM-

>DmelOR49a

MEKLSYEDFIFMANMMFKTLGYDLFHTPKPWRYLLV RGYFVLC TISNFYEASMTTR  
IIEWESLAGSPSKIMRQGLHFFYMLSSQLKFITFMINRKRLLQLSHRLKELYPHKEQNQRK

YEVNKYYLSCSTRNVLYVYYFVMVVMMALEPLVQSCIMYLGFGKADFTYKRIFPTRLTFD  
SEKPLGYVLAYVIDFTYSQFIVNVSLGTDLWMMC VSSQISMHLGYLANMLASIRPSPETEQ  
QDCDFLASIIKRHQLMIRLQKDVNYVFGLLLASNLF TTSCLLCMAYYTVVEGFNWEGIS  
YMMLFASVAAQFYVSSHGQMLIDLSTNLAKAAFESK WYEGSLRYKKEILILMAQAQRP  
LEISARGVIIISLDTFKILMTITYRFFAVIRQTVEK-

>DmelOR49b

MFEDIQLIYMNIKILRFWALLYDKNLRRYVCIGLASFHIFTQIVYMMSTNEGLTGIIRNSYM  
LVLWINTVLRAYLLLADHRYLALIQKLTEAYYDLLNLNDSYISEILDQVNKVGKLMARG  
NLFFGMLTSMGFGLYPLSSSERVLPFGSKIPGLNEYESPYYEMWYIFQMLITPMGCCMYIP  
YTSLIVGLIMFGIVRCKALQHRLRQVALKHPY GDRDPRELREEIIACIRYQQSII EYMDHINE  
LTTMMFLFELMAFSALLCALLFMLIIVSGTSQLIIVCMYINMILAQILALY WYANELREQNL  
AVATAAYETEWFTFDVPLRKNILFMMMRAQRPAAILLGNIRPITLELFQNLNNTTYTFFT VL  
KRVYG-

>DmelOR56a

MFKVKDLLSPTTFEDPIFGTHLRYFQWYGYVASKDQNRPLLSLIRCTILTASIWLSCALML  
ARVFRGYENLNDGATS YATAVQYFAVSIAMFNAYVQRDKVISLLRVAHSDIQNLMHEADN  
REMELLVATQAYTRTITLLIWIPSVIAGLMAYSDCIYRSLFLPKSVFNVPARRGEEHPILLF  
QLFPFGELCDNFVVGYLGPWYALGLGITAIPLWHTFITCLMKYVNLKLQILNKRVEEMDIT  
RLNSKLVIGRLTASELTFWQMQLFKEFVKEQLRIRK FVQELQYLICVPVMADFIIFS VLICFL  
FFALT VGVPSKMDYFFMFIYLFVMAGILWIYHWHATLIVECHDEL SLAYFSCGWYNFEMP  
LQKMLVFMMMHAQRPMKMRALLVDLNLRTFIDIGRGAYS YFNLLRSSHLY-

>DmelOR59a

MAEVRVDSLEFFKSHWTAWRYLGV AHFRVENWKNLYVFYSIVSNLLVTLCYPVHLGISLF  
RNR TITEDILNLTTFATCTACSVKCLLYAYNIKDVLEMERLLRLLDERVVGPEQRSIYGQVR  
VQLRNVLYVFIGIYMP CALFAELSFLFKEERGLMYPAWFPFDWLHSTRNY YIANAYQIVGI  
SFQLLQNYVSDCFPAVVLCLISSHIKMLYNRFEEVGLDPARDAEKDLEACITD HKHILELFR  
RIEAFISLPMLIQFTVTALNVCIGLAALVFFVSEPMARMYFIFYSLAMPLQIFPSCFFGTDNE  
YWFGRLHYAAAFSCNWH TQNRSFKRKMMLFVEQSLKKSTAVAGGMMRIHLD TFFSTLKG  
AYSLFTIIIRMRK-

>DmelOR59b

MAVFKLIKPAPLTEKVQSRQGN IYLYRAMWLGWIPPKEGV LRYVYLFWTCVPFAFGV FY  
LPVGFII SYVQEFKNFTPG EFLTSLQVCINVY GASVKSTITYLFLWRLRKTEILLDSL DKRLA  
NDSDRERIHNMVARCN YAFLIYSFIYCGYAGSTFLSYALSGRPPWSVYNPFIDWRDGMGSL  
WIQAIFEYITMSFAVLQDQLSDTYPLMFTIMFRAHMEVLKDHVRS LRMDPERSEADNYQD  
LVNCVLDHK TILKCCDMIRPMISRTIFVQFALIGSVLGLTLVNVFFFSNFWKGVASLLFVITI  
LLQTFPCYTCNMLIDDAQDLSNEIFQSNWVDAEP RYKATLVLFMHHVQQPIIFIAGGIFPIS  
MNSNITVAKFAFSIITIVRQMNLAEQFQ-

>DmelOR59c

MTKFFFKRLQTAPLDQEVSSLDASDYY YRIAFFL GWTPPKGALLRWIYSLWTLTTMWLGI  
VYLPLGLSLTYVKHFDRFTPTEFLTSLQVDINCIGNVIKSCVTYSQMWRFRMNELISSLD  
KRCVTTTQRRIFHKMVARVNLIVILFLSTYLGFCFLTLFTSVFAGKAPWQLYNPLVDWRKG  
HWQLWIASILEYCVV SIGTMQELMSDTYAIVFISLFRCHLAILRDRIANLRQDPK LSEMEH  
YEQM VACIQDHRTIIQCSQIIRPILSITIFAQFMLV GIDLGLAAISILFFPNTIWTIMANVSFIVA  
ICTESFPCCMLCEHLIEDSVHVSNALFHSNWITADRSYKSAVLYFLHRAQQPIQFTAGSIFPI

SVQSNIAVAKFAFTIITIVNQMN LG EKFFSDRSNGDINP-

>DmelOR63a

MYSPEEAAELKRRNYRSIREMIRLSYTVGFNLLDPSRCGQVLRIWTIVLSVSSLASLYGHW  
QMLARYIHDIPRIGETAGTALQFLTSAKMWYFLFAHRQIYELLRKARCHELLQKCELFER  
MSDLPVIKEIRQQVESTMNRYWASTRRQILIYLYSCICITTNYFINSFVINLYRYFTKPKGSY  
DIMLPLPSLYPAWEHKGLEFPYYHIQMYLETCSLYICGMCAVSFDGVFIVLCLHSVGLMRS  
LNQMVEQATSELVPPDRRVEYLRCICIYQYQRVANFATEVNNCFRHITFTQFLLSLFNWGLA  
LFQMSVGLGNNSSITMIRMTMYLVAAGYQIVVYCYNGQRFATASEEIANAFYQVRWYGE  
SREFRHLIRMMLMRTNRGFRLDVSWFMQMSLPTLMAMVRTSGQYFLLLQNVNQK-

>DmelOR64

MKLSETLKIDYFRVQLNAWRICGALDLSEGRYWSWSMLLCILVYLPTPMLLRGVYSFEDP  
VENNFSLSLT VT SLSNLMKFCMYVAQLTKMVEVQSLIGQLDARVSGESQSERHRNMTEHL  
LRMSKLFQITYAVVFIIAAVPFV FETELSLPMPMWF PFDWKNSMVAYIGALVFQEIGYVFQI  
MQCFAADSFPLVLYLISEQCQLLILRISEIGYGYKTELENEQDLVNCIRDQNALYRLLDVT  
KSLVSYPM MVQFMVIGINIAITLFLIFYVETLYDRIYYLCFLLGITVQTYPLCYYGTMVQE  
SFAELHYAVFCSNWVDQSAS YRGHMLILAERTKRMQ LLLAGNLVPIHLSTYVACWKGAYS  
FFTLMADR DGLGS-

>DmelOR65a

MTELRSERKNGNWDRLFGPFFESWAVFKAPQA KSRHIIAYWTRDQLKALGFYMNSEQR  
LPRIVAWQYFVSIQLATALASLFYGISESIGDIVNLGRDLVFIITII FICFRLVFFAQYAGELDVI  
IDALEDIYHWSIKGPATKEVQETKRLHFLLFMALIITWFSFLILFMLIKISTPFWIESQTLPFH  
VSWPFQLHDPSKHPIAYIIIFVSQSTTMLYFLIWLG VVENMGVSLFFELTSALRVLCIELRNL  
QELCLGDEDMLYRELCRMTKHFHQIILLTDRCNHIFNGAFIMQMLINFLVSLSLFEVLAA  
KKNPQVAVEYMIIMLMTLGHLSFWSKFGDMFSKESEQVALAVYEAYDPNVGSKSIHRQFC  
FFIIRAQKPLIMKASPFPPFNLENYMFILKQCYSILTILANTLE-

>DmelOR65b

MDIQRFLKFKYKVGWKT YRDPLMEASHSSIYYWREQMKAMALFTTTEERLLPYRSKWHT  
LVYIQMVIFFASMSFGLTESMGD HVQMGRDLAFILGAFFII FKTYYFCWYGDEL DQVISDL  
DALHPWAQKGNPVEYQTGKRWYFVMAFFLATSWSFFLCILL LLLITSPMWWHQQLPF  
HAAFPFQWHEKSLHPISHAIIYLFQSYFAVYCLTWLLCIEGLSICIYAEITFGIEVLCLELRQI  
HRHNYGLQELR METNRLV KLHQKIVEILDRTNDVFHGT LIMQMGVNFSLVSLVLEAVEA  
RKDPKVVAQFAVLMLLALGHLSMWSYCGDQLSQKSLQISEAAYEAYDPTK GSKDVYRDL  
CVIIRRGQDPLIMRASPFPSFN LINSAILNQC YGILTFL LKTLD-

>DmelOR65c

MDIRGNVHRFVKFYIDGWKHFRDPTMESSYS AVYYWREQMKAMFLYTT SKERQMPYRS  
SWHTLVIIQATVCFLTMCYGVTESLGDKVQMGRDIAFIIGFFYIAFKIYYFQWYGDELDEV  
VEALET FHPWAQKGP GAVDYRTAKRWYFTLAFFLASSWL VFLCIFILL LITSPWVHQQLP  
LHAAFPFQWHEKSIHPISHAFIYLFQ TWNVMYFLTWLV CIEGLSVSIYVEITFAIEVLCLELR  
HLHQ RCHGYEQLRLETNRLVQFHQKIVHILDHTNKV FHGT LIMQMGVNF FLVSLVLEA  
MEARKDPKVVAQFAVLMLLALGHLSMWSYFGD LLSQKSLTISEAAYEAYDPIK GSKDVY  
RDLCLIIRRGQEPLIMRASPFPSFN FINYSAILNQC YGILTFL LKTLD-

>DmelOR67a

MDNVAEMPEEKYVEVDDFLRLAVKFYNTL GIDPYETGRKRTIWFQIYFALNMFNMVFSFY  
AEVATLVDRLRDNENFLESCILLSYVSFVVMGLSKIGAVMKKKPKMTALVRQLET CFPSPS

AKVQEEYAVKSWLKRCHIYTKGFGGLFMIMYFAHALIPLFIYFIQRVLLHYPDQAKQIMPFY  
QLEPWEFRDSWLFYPSYFHQSSAGYTATCGSIAGDLMIFAVVLQVIMHYERLAKVLRFKI  
QAHNAPNGAKEDIRKQLQSLVANHIDILRLTDLMNVEVFGIPLLLNFASALLVCLVGVQLTIA  
LSPEYFCKQMLFLISVLLLEVYLLCSFSQRLIDASENVGHAAYDMDWLGS DKRFKKILIFIS  
MRSQKPVCLKATVVLDSLMPMTMSIFLGMSYKFFCAVRTMYQ-

>DmelOR67c

METAKDNTARTFMELMRVPVQFYRTIGEDIYHRSTNPLKSLLFKIYLYAGFINFNLLVIGE  
LVFFYNSIQDFETIRLAI AVAPCIGFSLVADFKQAAMIRGKKTLMILLDDLENMHPKTLAKQ  
MEYKLPDFEKTMRVINIFTFLCLAYTTTFSFYPAIKASVKFNFLGYDTFDRNFGFLIWFPP  
DATRNNLIYWIMYWDIAHGAYLAGIAFLCADLLL VVVITQICMHFNYSMRLEDHPCNSN  
EDKENIEFLIGIIRYHDKCLKLCEHVNDLYSFSLLL NFLMASMQICFIAFQVTESTVEVIIIYC  
IFLMTSMVQVFMVCYYGDTLIAASLKVGDAAYNQKWFQCSKSYCTMLKLLIMRSQKPAS  
IRPPTFPPI SLVTYMKVISMSYQFFALLRTTYSNN-

>DmelOR67d

MLKMAKVEPVERYCKVIRMIRFCVGF CGNDVADPNFRMWWLT YAVMAAIAFFFACTGY  
TIYVGVVINGDLTIILQALAMVGS AVQGLTKLLVTANNASHMREVQNTYEDIYREYGSKG  
DEYAKCLEKRIRITWTLIGFMLVYIILLGLVITFPIFYLLILHQKVLVMQFLIPFLDHTTDGG  
HLILTAHVILITFGGFGNYGGDMYLFVTHVPLIKDIFCVKLTEFNELVMKRNDFPKVR  
AMLCDLLVWHQLYTRMLQTTKKIYSIVLFVQLSTTCVGLLCTISCIFMKAWPAAPLYLLYA  
AITLYTFCGLGTLVENSNE DFLSVIYTNCLWYELPVKKEKLIIMMLAKAQNEVVLTADM  
APLSMNTALQLTKGIYSFSMMLMNYLG-

>DmelOR69

MQLHDHMKYIDLGCKMACIPRYQWKGRPTERQLNASEQRIVFLLGTICQIFQITGVLIYW  
YCNGLRATETGT FVAQLSEMCSFCLTFVGF CNVYAISTNRNQIETLLEELHQIYPRYRKNH  
YRCQHYFDMAMTIMRIEFLFYMILYVYYNSAPLWVLLWEHLHEEYDLSFKTQTNTWFPW  
KVHGSALGFGMAVLSITVGSFVGVGFSIVTQNLICLLTFQLKLHYDGISSQLVSLDCRRPGA  
HKELSILIVHHSRILQLGDQVNNIMNFVFGSSLVGATIAICMSSVSIMLLDLASAFKYASGLV  
AFVLYNFVICYMGTEVTLAMQLQDFMRYPDLCQAAQLPRYTWNRRSLEV KRNLA KRI  
IFWLGAVNLVYHNIGCVMYGYFVDGRTKDPIEYLAELASVASMLGFTIVGTLNLWKMLSL  
KTHFENLLNEFEELFQLIKHRAYRIHHYQEKYTRHIRNTFIFHTSAVVYYNSLPILLMIREHL  
SNSQQLGYRIQSNTWYPWQVQGSIPGFFAAVACQIFSCQTNMCMVNMFIQFLINFFGIQLEIH  
FDGLARQLETIDARNPHAKDQLKYLIVYHTKLLNLADRVNRSFNFTFLISLSVSMISNCFL  
AFSMTMFDGFTSLKHLGLLLFITYNFSMCRSGTHLILTSGKVLPAAFYNNWYEGDLVYR  
RMLLILMMRATKPYMWKTYKLAPVSITTYMATLKFSYQMFTCVRSK-

>DmelOR71a-B

MDYDRIRPVRFLTGV LKWWRLWPRKESVSTPDWTNWQAYALHPFTFLVLLLWLEAIK  
SRDIQHTADVLLICLTTTALGGKVINIWKYAHVAQGILSEWSTWDLFELRSKQEVDMWRF  
EHRFRNRVFMFYCLCSAGVIPFIVIQPLFDIPNRLPFWMWTPFDWQQPVLFWYAFIYQATTI  
PIACACNV TMDAVNWYMLHLSLCLRMLGQRLSKLQHDDKDLREKFLELIHLHQRLKQ  
QALSIEIFISKSTFTQILVSSLIICFTIYSMQMSPVLQDLPGFAAMMQYL VAMIMQVMLPTIY  
GNAVIDSANMLTDSMYNSDWPDMNCRMRRLVLMFMVYLNRPVTLKAGGFFHIGLPLFT  
KTMNQAYSLLALLLNMQ-

>DmelOR74a

MSFHRYRPRLP GGELAPMPWPVSLYRVLNHVAWPLEAESGRWTVFLDRLMIFLGFVLFCE

HNEVDFHYLIANRQDMDNMLTGLPTYLILVEMQIRCFQLAWHKDRFRALLQRFYAEIYVS  
EEMEPHLFASIQRQMLATRVNSTVYLLALLNFFLVPVTNVYIHRREMLYKQVYVYFDNTQL  
HFFIPLLVLNFWVGFIIITSMFLGELNVMGELMMHLNARYIQLGQDLRRSAQMLLKSSSL  
NVAIAYRLNLTHILRRNAALRDFGQRVEKEFTLRIFVMFAFSAGLLCALFFKAFTNPWGNV  
AYIVWFLAKFMELLALGMLGSILLKTTDELGMMYYTADWEQVIHQSDNVGENVKLMKL  
VTLAIQLNSRPFITGLNYFRVSLTAVLKIIQGAFSYFTFLNSMR-

>DmelOR82a

MGRLFQLQEYCLRAMGHKDDMDSTDSTALSLKHISLIFVISAQYPLISYVAYNRNDMEK  
VTACLSVVFNTMLTVIKISTFLANRKDFWEMIHFRKMHEQSASHIPRYREGLDYVAEAN  
KLASFLGRAYCVSCGLTGLYFMLGPIVKIGVCRWHGTTCDKELPMPMKFPFNDLESPGYE  
VCFLYTVLVTVVVVAYASAVDGLFISFAINLRAHFQTLQRQIENWEFSPSEPDTQIRLKSIVE  
YHVLLLSLSRKLRSIYTPTVMGQFVITSLQVGVIIYQLVTNMDSVMDLLLYASFFGSIMLQL  
FIYCYGGEIKAESLQVDTAVRLSNWHLASPKTRTSLSLIILQSQKEVLIRAGFFVASLANFV  
GICRTALSLITLIKSIE-

>DmelOR83a

MKSTFKEERIKDDSKRRDLFVFRQTMCIAAMYVPGYYVNGSGVLAVLVRFCDLTYELFN  
YFVSVHIAGLYICTIYINYGQGDLDFFVNCLIQTHIYLWTIAMKLYFRRFRPGLLNTILSNIND  
EYETRSVGFVFMAGSYRMSKLWIKTYVYCCYIGTIFWLALPIAYRDRSLPLACWYPF  
DYTQPGVYEVVFLQAMGQIQVAASFASSGLHMLVLCVLISGQYDVLFCSLKNVLASSYV  
LMGANMTELNLQAEQSAADVEPGQYAYSVEEETPLQELLKVGSSMDFSSAFRLSFVRCI  
QHHRIVAALKKIESFYSPIWFKIGEVTFLMCLVAFVSTKSTAANSFMRMVSLGQYLLLV  
LYELFIICYFADIVFQNSQRCGEALWRSPWQRHLKDVRSDYMFMLNSRRQFQLTAGKISN  
LNVDRFRGTITTAFSFLTLLQKMDARE-

>DmelOR83bORco

MTTSMQPSKYTGVLADLMPNIRAMKYSGLFMHNFTGGSAFMKKVYSSVHLVFLLMQFTF  
ILVNMALNAEEVNELSGNTITTLFFTHCITKFIYLAVNQKNFYRTLNIWNQVNTHPLFAESD  
ARYHSIALAKMRKLFVLMLTIVASATAWTTITFFGDSVKMVVDHETNSSIPVEIPRLPIKSF  
YPWNASHGMFYMISFAFIYYVLFMSIHSNLCDVMFCSWLIFACEQLQHLKGMKPLMEL  
SASLDTYRPNAAALFRSLSANSKSELHNEEKDPGTDMDMSGIYSSKADWGAQFRAPSTL  
QSFSGNGGGGNGLVNGANPNGLTKKQEMMVRSIAIKYWVERHKHVRLVAAIGDITYGA  
ALLLHMLTSTIKLTLAYQATKINGVNVYAFTVVGYLGYALAQVFHFCIFGNRLIESSSV  
MEAAYSCHWYDGSSEAKTFVQIVCQCQKAMSISGAKFFTVSLLDFASVLGAVVITYFMV  
LVQLK-

>DmelOR83c

MSTSESPSRFRELKYSINSLTNLLGVDFLSPKLFNRYRTWTTIFAIANYTGFTVFTILNNGG  
DWRVGLKASLMTGGLFHGLGKFLTCLLKHQDMRRLVLYSQSIYDEYETRGDSYHRTLNS  
NIDRLLGIMKIIRNGYVFAFCLMELLPLAMLYDGRVTAMQYLIPGLPLENNYCYVVTY  
MIQVTMLVQGVGFYSGLDFVFLGLTQILTFADMLQVKVKELNDALEQKAEYRALVRVG  
ASIDGAENRQRLLLDVIRWHQLFTDYCRAINALYELIATQVLSMALAMMLSFCINLSSFH  
MPSAIFVVSAYSMSIYCILGTILEFAYDQVYESICNVTWYELSGEQRKLFGLLRESQYPH  
NIQILGVMSLSVRTALQIVKLIYSVSMNNMRA-

>DmelOR85a

MIFKYIQEPVLGSLFRSRDSLIIYLNRSIDQMGWRLPPRTKPYWWLYYIWTLVVIVLVFIFIP  
YGLIMTGIKEFKNFTTTDLFTYVQVPVNTNASIMKGIIVLFMRRRFSRAQKMMMDAMDIRC

TKMEEKVQVHRAAALCNRV VVIYHCIYFGYLSMALTGALVIGKTPFCLYNPLVNPDDHFY  
LATAIESVTMAGIILANLILDVYPIIYVVVLR IHMELLSERIKTLRTDVEKGDDQHAYAE LVEC  
VKDHKLIVEYGNLTPMISATMFIQLLSVGLLLGLAAVSMQFYNTVMERVVSGVYTAILS  
QTFFPCYVCEQLSSDCESLTNTLFHSKWIGAERRYRTTMLYFIHNVQQSILFTAGGIFPICLN  
TNIKMAKFAFSVVTIVNEMDLAEKLRRE-

>DmelOR85b

MEKLMKYASFFYTAVGIRPYTNGEESKMNKLIFHIVFWSNVINLSFVGLFESIYVYSAFMD  
NKFLEAVTALS YIGFVTVGMSKMFFIRWKKTAITELINELKEIYPNGLIREERYNLPMYLG T  
CSRISLIYSLLYSVLIWTFNLFCVMEYWVYDKWLNIRVVGKQLPYLMYIPWKWQDNWSY  
YPLLFSQNFAGY TSAAGQISTDVL LCAVATQLVMHFDFLSNSMERHELSDGWKKDSRFLV  
DIVRYHERILRLSDAVNDIFGIPLLLNFMVSSFVICFVGFQMTVGVPPDIVVKLFLVSSMS  
QVYLICHYGQLVADASYGFSVATYNQKWYKADVRYKRALVIIIARSQKVTF LKATIFLDIT  
RSTMTDLLQISYKFFALLRTMYTQ-

>DmelOR85c

MKFMKYAVFFYTSVGI EPTYTIDSRSKKASLWSHLLFWANVINLSVIVFGEILYLG VAYS DGK  
FIDAVTVLSYIGFVIVGMSKMFFIWWKKTDLSDLVKELEHIYPNGKAEEEMYRLDRYLRS  
CSRISITYALLYSVLIWTFNLFSIMQFLVYEKLLKIRVVGQTLPYLMYFPWNWHENW TYYV  
LLFCQNFAGHTSASGQISTD LLLCAVATQVVMHFDFYLARVVEKQVLD RDWSEN SRFLAKT  
VQYHQRILRLMDVLNDIFGIPLLLNFMVSTFVICFVGFQMTVGVPPDIMIKLFLFLSSLSQ  
VYLICHYGQLIADASSLSISAYKQNWQNADIRYRRALVFFIARPQR TTYLKATIFMNITRA  
TMTDLLQVSYKFFALLRTMYIK-

>DmelOR85d

MLTKKDTQSAKEQEKLKA IPLHSFLKYANVFYLSIGMMAYD HKYSQKWKEVLLHWT FIA  
QMVNLTNLVLISELIYVFLAIGKGSNFLEATMNL SFIGFVIVGDFKIWNISRQRKRLTQV VSR  
LEELHPQGLAQQEPYNIGHHLSGYSRYSKFYFGMHMVLIWTYNLYWAVYYLV CDFWL G  
MRQFERMLPYYCWVPWDWSTGYSYFMYISQNIGGQACLSGQLAADMLM CALVTLV V  
MHFIRLSAHIESHVAGIGSFQHDLEFLQATVAYHQSLIHL CQDINEIFGV SLLSNFVSSSFIIC F  
VGFQMTIGSKIDNLVMLVLF LFCAMVQVFMIATHAQR LVDASEQIGQAVYNH DWFRADL  
RYRKMLLIIKRAQQPSRLKATMFLNISLVTVSDLLQLSYKFFALLRTMYVN-

>DmelOR85f

MEPVQYSYEDFARLPTTVFWIMGYDMLGVPKTRSR RILYWIYRFLCLASHGVCVGMV F  
RMVEAKTIDNVSLIMRYATLVTYIINS DTKFATVLQRS AIQSLNSKLAELYPKTTLDRIYHRV  
NDHYWTKSFVYLVIYIGSSIMVVIGPIITSIIAYFTHNVFTYMHCYPYFLYDPEKDPVWIYI  
GIYALEWLHSTQMVISNIGADIWLLYFQVQINLHFRGIIRSLADHKPSVKHDQEDRKFI AKI  
VDKQVHLVSLQNDLNGIFGKSLLSLLTTAAVICTVAVY TLIQGPTLEGFTYVIFIGTSVMQ  
VYLVCCYGGQVLDLSGEVAHAVYNHDFHDASIA YKRYLLIIIRAQQPVELNAMGYLSISL  
DTFKQLMSVSYRVITMLMQMIQ-

>DmelOR87

MTIEDIGLVGINVRMWRHLAVLYPTPGSSWRKF AFVLPVTAMNLMQFVYLLRMWGD LPA  
FILNMFFFS AIFNALMRTWLVIKRRQFE EFLGQLATL FHSILDSTDEWGRGILRAEREAR  
NLAILNLSASFLDIVGALVSPLFREERAH PFGVALPGVSMTSSPVYEVYLAQLPTPLLLSM  
MYMPFVSLFAGLAIFGKAMLQILVHRLGQIGGEEQSE EERFQRLASCIAYHTQVMRYVWQ  
LNKLVANIVAVEAIIFGSII CSLLFCLNIITSPTQVISIVMYILTMLYVLFTYYNRANEICLENN  
RVAEAVYNVPWYEAGTRFRKTL LIFLMQTQHPMEIRVGNVYPMTLAMFQSLLNASYSYF



TMLRGVTGK-

>DmelOR88a

MKPTEIKKPYRMEEFLRPQMFQEVAQMVHFQWRRNPVDNSMVNASMVPFCLSAFLNVL  
FFGCNGWDIIGHFWLGHANQNPPVLSITIYFSIRGLMLYLKRKEIVEFVNDLDRECPDLV  
SQLDMQMDETYRNFWRQYRFIRIYSHLGGPMFCVVPLALFLLTHEGKDTPVAQHEQLLG  
GWLPCGVKDPNFYLLVWSFDLMCTTCGVSFVTFDNLFNVMQGHLMHGLHARQFS  
AIDPRQSLTDEKRFFVDLRLLVQRQQLNGLCRKYNDIFKVAFLVSNFVGAGSLCFYLFML  
SETSDVLIQAQYILPTLVLVGFTFEICLRGTQLEKASEGLESSLRSQEWYLGSRRYRKFYLL  
WTQYCQRTQQLGAFGLIQVNMVHFTEIMQLAYRLFTFLKSH-

>DmelOR92a

MLFRKRKPKSDDEVITFDELTRFPMTFYKTIGEDLYSDRDPNVIRRYLLRFYLVLGFLNFN  
AYVVGEIAYFIVHIMSTTTLEATAVAPCIGFSFMADFKQFGLTVNRKRLVRLDDLKEIFPL  
DLEAQRKYNVSYRKHMRVMTLFTILCMTYTSFSFYPAIKSTIKYYLMGSEIFERNYGF  
HILFPYDAETDLTVYWFSYWGLAHCAYVAGVSYVCVDLLLIATITQLTMHFNFANDLEA  
YEGGDHTDEENIKYLHNLVYHARALDLSEEVNNIFSFLILWNFIAASLVICFAGFQITASN  
VEDIVLYFIFFSASLVQVFCYYGDEMISSSSRIGHSANQNLWPCSTKYKRILQFIIARSQ  
KPASIRPPTFPPIFNFMKVISMSYQFFALLRTTYG-

>DmelOR94a

MDKHKDRIESMRLILQVMQLFGLWPWSLKSEEEWTFVGFVKNRYRFLHLPITFTFIGLM  
WLEAFISSNLEQAGQVLYMSITEMALVVKILSIWHYRTEAWRLMYELQHAPDYQLHNQE  
EVDVFWREQRFFKWWFYIYLISLGVVYSGCTGVLFLEGYELPFAYYVPFEWQNERRYWF  
AYGYDMAGMTLTCISNITLDTLGCYFLFHISLLYRLLGLRLRETKNMKNDTIFGQQLRAIFI  
MHQRIRSLTLCQRIVSPYILSQILSALICFSGYRLQHVGIKRDNPQGFISMLQFVSVMLQIY  
LPCYYGNEITVYANQLTNEVYHTNWLECRPPIRKLLNAYMEHLKKPVTIRAGNFFAVGLPI  
FVKTINNAYSFLALLLNVS-

>DmelOR94b

MESTNRLSAIQTLVQRWIGLLKWEENEGEDGVLTLWKRIYPFVHLPLTFTYIALMWYEA  
ITSSDFEEAGQVLYMSITELALVTKLLNIWYRRHEAASLIHELQHDPAFNLRNSEEIKFWQQ  
NQRNFKRIFYWYIWGSLFVAVMGYISVFFQEDYELPFGYYVPFEWRTRERYFYAWGYNV  
VAMTLCCLSNILLDTLGCYFMFHIAASLFRLLGMRLEALKNAAEKARPELRRIFQLHTKVR  
RLTRECEVLVSPYVLSQVVFSAFIICFSAYRLVHMGMFKQRPGLFVTTVQFVAVMIVQIFLPC  
YYGNELTFHANALTNVFGTNWLEYSVGTRKLLNCYMEFLKRPVKVRAGVFEIGLPIFV  
KTINNAYSFFALLLKISK-

>DmelOR98a

MLFNYLKPNPTNLLTSPDSFRYFEYGMFCMGWHTPATHKIIYYITSCLIFAWCAVYLPIGII  
ISFKTDINTFTPNELLTVMQLFFNSVGMPPKVLFFNLYISGFYKAKKLLSEMDKRCTTLKER  
VEVHQGVVRCNKAYLIYQFIYTAYTISTFLSAALSGLPWRIYNPFVDFRESRSSFWKAAL  
NETALMLFAVTQTLMSDIYPLLYGLILRVHLKLLRLRVESLCTDSGKSDAENEQDLIKCIKD  
HNLIIDYAAAIRPAVTRTIFVQFLIGICLGLSMINLLFFADIWTGLATVAYINGLMVQTFPFC  
FVCDLLKKDCCELLVSAIFHSNWINSRSYKSSRLRYFLKNAQKSAFTAGSIFPISTGSNIKVA  
KLAFSVVTFVNQLNIADRLTKN-

>DmelOR104

MASLQFHGNVDADIRYDISLDPARESNLFRLLMGLQLANGTKPSPRLPKWWPKRLEMIGK  
VLPKAYCSMVIFTSLHLGVLFTKTTLDVLPTELQAITDALMTIYFFTYGTYWCLRSR

RLLAYMEHMNREYRHSLAGVTFVSSHAAFRMSRNFTVVWIMSCLLGVISWGVSPMLL  
GIRMLPLQCWYPFDALGPGTYTAVYATQLFGQIMVGMTFGFGGSLFVTLSSLLLGQFDVL  
YCSLKNLDAHTKLLGGESVNLSSLQEELLGDSKRELNQYVLLQEHPTDLLRLSAGRKC  
PDQGNAFHNALVEICIRLHRFILHCSQELENLFSPLYCLVKSQITFQLCLLVFVGVSGTREV  
RIVNQLQYLGLTIFELLMFTYCGELLSRHSIRSGDAFWRGAWWKHAHFIRQDILIFLVNSR  
RAVHVTAGKFYVMDVNRLRSVITQAFSFLTLQKLAACKTESEL-

>HarmOR1

MKILSDGSDLEGVEKVEDIFYINLARKSMWILDSWPKTPNESVTYRYFVLALNVATLVGG  
AVYLRNNTGVLSSFELGHTYITVFMNCITCSRCIMILSREYNEVMLSFVNKIHLFHRHKS  
EYAYKTHIFIHKISHFYTVYLLGLALNGLLLFNMIPIFYNCYSRGMFRDVIPANATYDHSVYF  
SVPFDYTTKFKGYIAMTSFNCFISYTCYSYFCVVDLTVSLVIFHLWGHMRLTYHLANFKK  
PASVLESNENTDAIKDHSYTQEELKEVFGKLRERYIRHHNLILNFSAEMSNAFGPALLAYMV  
FHQVSGCILLECSQLDMKTLVRYGPLTVVIFQQLIQISVIFELGSSNDKLIDAVYLVPEWY  
MDTKNRKLVFVMLRQSQRSIDLKMMSMLTVGVQTMTAILKTSFSYFVMLKTVAEEEQ-

>HarmOR2

MYAGNAVITGITGPMYKYMKVLRFLVRIISGWPGKALGEKTLRIEGMGHAYYNTILSLVY  
LALGIAYLKKNFHRFDLELGQLYIVLLMNMLSTSRAFTLCLSQKYREVAKIFIQIKIHLFYF  
KEKSDFAMKIHITVHKISFISAVYLSVLLFIAACMFNLIPMYNNYSAGRFASFDNLENTTYE  
QAISCLYPWNFETNFNGYLAATLSGWYGTILCGSSVSMFDLFLCLMIFNLWGHFKILIYNL  
EHFPRPASEVVDAAEGEERSGRTVGSEMYSQSELEEVAVLLRDCIQYHMLIYNFTNNMSDA  
FGMALFIYYSFHQITGCLLLECSQMTAAALTRYLPLTIIMFGELVLLSIIFETIGTMSEKLD  
AVYKVPWEYMDTKNRRTVLIFLIKVQEPHVKAGGLVDVGVTTMASILKTSFSYFAFLRTF

-

>HarmCOR3

MGLRQFLFENEAVEGINSASDYLYIKVLRFMILLIVNSWPRKEIGEPESPKFSAFVKYFYLVV  
TVSGSAGFILYLVKHNSELTFLETGHMYIVLLMSLIDVSRVATLTMSTTYREVARDFLTKIHL  
FYYKDRSKQAMETHRAVHKIAHLFTLWLVSQMLSGLSLFIIPMYSNYAAGRFSGEVSKN  
STFEHSMYYPPFNTSTDIRGYSIACIIHWIISYLCSTWFCMFDLFLSLMVFHLWGHFKILN  
YTLNDFPRPSSEVEAAKYSDEELVEVAARLKDCILYHREIILFTDRMSNVFGPMLFLYYMF  
HQASGCLLLECSQMTAQALIRYVPLTIILTQQLIQLSVIFELVGSSEDKLKHAVYGVPEWEC  
MDVKNRRSVVIFLANTQEPVHVKAMGVANVGVTSMAAILKTSMSYFTFLRSL-

>HarmOR29

MGYQQIDCFDIHLKILRILGVWPHDNPSIYYIYFSRIFVFTFTVLYVVIYTMNFYFLPQQLE  
VFADELIFYFTNVGALSALAFIFLRDKVKKMLFMLESEIFQSDDP EEIKLIKEGKEKSNFY  
WKITAGLSVSANTVNVCLPLLVHIIFSVELEFPVCRYSFIPKEYEAMFAYPAYFYQSIGITTH  
MLYNVNIDTFLLGVMFLAMTQLDILDRKLRKVTDV CINPDAARGSVDKFIDDQNAVLEII  
KCIKHYDAICEYCKLIQDAFSEILFVLFSSGSKICMCLFRFTMPATTGYFVFLYTYVTVM  
LQVMVPCWFGSRLMDKSSQITIAAYDCDWTPRCRRFKSNLRLLLVERANRPITIGGKMFL  
SLGTFTAIMNSSYSFFTLMRHMQR-

>HarmOR20

MDEELEFKPFHETYRLITFSLCIAMIYPNPRTEKWRLFSIPILIATVAPVAIMIFLDMYKCWK  
NGDIVNIIRHSTVVGPFLGGFFKMILMYHKRVQAKQILDEFDRDHLMFNTVAETYKDIAR  
ASIRNCQIYSERLWACLVTTCVMTFPVMAIVLNIYNFMFKSEPTKYMIIHLEKPFKEPEE  
RFESPYFELLFVYMFYAAAILYVVNFTGYDGGFFGLCVNHARLKMELYCKALEEAMMADRE

EVYGRVIAVIREQCRMFRYVDLIQDTFNIWLGIIFIATMIQICTCLYHITEGYGFDIRYMIFVY  
GAVVHIYLPCTRYAAKLKAMSMETSNRFYCSGWERVDDERVRKMIVFMIARAQVPNEITAF  
NMMAFDMELFLSILQTSYSMFTLLRS-

>HarmOR18

MEMKVDVLPEKKYKGFNETFKLCAFLAFAFLYPNRTTALRRCITITLIVTFCGGQLFWFIT  
YTFKCLYTLDIYNFARNMTLAVVVLVFFIKTYVVIYATSKFAPLLDKISDDLLEANNLEEEF  
QVLYDDHIKIAKVGEISWLLIPTIMSALFPIYAGALMTIESIQTDDYERRMVHDMELLFVED  
IQSETPFFQCMFAYNCVQC VVLVPNYCGFDGSCFIATTHLRRLKLMKLVNKAFKYSKS  
RQELRMRLYDSIKDHQDALDFYVQLQNVYGPWLFVAVLLTSFMISFNLYQIYLLQRIDPKY  
TSFGVVGVLHIYLPCTRYASDLTRVSEEIPDDLYLAQWEAWADPSITKLLMFMITRAQKEMI  
VTGMGLVVFNMEMFKSILQTSYSFFTLITA-

>HarmOR17

MFLRSECARSVAPHVRVLRVCGFLRGAALSSRGRAERLALRSYHALALAATSLYVLQAV  
YAYQERGMMDKPSQVMFLMLCHVTCVVKQIAFHVDADRIDLRIASLDEPLLNCAGERG  
ALLRGTARGAARLLRXYAGCAVATCVLWIVFPVINRIQGISFEFPFWTGFSYDHNNAVFTLV  
LQSFYCTNLVAIGNTSMDAFMATILDQCKTQLRILRINFESLPERARALHVESGENYDITLD  
KLFVDCLVHYNKITEMCTELHDVFAVPLLQFGVGGWIPCAAYKIVSLDVLSEFASITLF  
ITCILIELFICYGNEVTVESERSQSLYSMEWRRARLTFRRSLVLMERAKRPLRPAAGR  
VIPLSLDTFVKILKSSYSFYAVLRQTK-

>HarmOR14b

MAGLRDFFNYEANEAITPKNYPYLIIMRISLSLIKCWPKKTENLAAGAKMKAKVWG  
MVQNVLHLAFCVLTIVGTATYVMIHKKNMFTFELGHLYITLMLSCVVFSRLATLTFNEEYQ  
VVANEFLNKIHLFYKDNSEFSMQTHKQIHRVSHLFTLYVTGQMLGGLSLFNLTMPYNNY  
SAGKYSKGGKLNSTFDHSLYSSYPFDVSTGVRGYIFSNILHWFFSYIVSTWICTLDFLSVI  
VFHIWGHFKILLHDIDNFKPSKMVSFKLKNTNVTISNENYSTEELEQLADKLLKCIDYHR  
EISFTNKISEVFGPMLLAYYGHFQASGCLLLECSQMTPEALARYLPLTLILFQQLIQLSIVF  
ELVGTVSSKLNDAVYGLPWEDMDVKNRKTVAFFLLNVQEPVHVKALGPADVGVTSMTKI  
LKTSMSFFTFLRSM-

>HarmOR14a

MGGIRDFFINLEAKEGITKPTDYPYMLCRHLLTVITCWPKPEKGLDTRAKLKARIWVTF  
QKIFHLNGCFITTIGMAMYIALHKNSMSFFELGHLYISLLMTVVIFSRVTTLWCWNPEYQAVA  
TDFLTKIHLFYKDDSDFSMQTHKQVHKISHLFTLLTGQMVAGMSLNFNLTMPHNNFSTG  
KYKKGGLKNSTFEHSLYFSYPFNASSDVRGYILSNIFHWIISYLCSTWFCTLDFLSIVVFH  
VWGHFKILIHDLNHFPRSLNTISFRLDQSNITLTTEMYSSRELQVSRNLNKSVEYHRRIVS  
FTDKMSEVFGPMLFVYGFHQTSGCLLLECSQMTVEALVRYLPLTILFQQLIQLSIIFELV  
GSVSDKLDKDAVYGLPWEDMDTKNRKTVAFFLMNVQEPVHVKALGLADVGVTSMTAILK  
TSMSYFTFLRSM-

>HarmOR12

MEDEPLLIDKTVKNIEFLFRCTGINIKSGTKTRKDMIKSRTVYIINFLWLNIDLAGAVMWFF  
TGIANSKSFTELTYVAPCITLSFLGNLKSFLILREKHVDKLIQVLRDLEINEKARPKSEETD  
AIIKYEHNFTVTTVISVLNVLYFVLLVAFALSPVSLVALKYFTTNELELLLPLIVYFPDPYDIR  
YWPWVYLRQIWSEVVIIIDICTADYLFYTFCTYIRMQFRLLKHYIERVIPEDDGGGRLTNIE  
QVRAEFVLLIKWHQDLISSANMLETVYTRSTLNFVSSSVLICLTGFNVMAISDVAFVATFL  
SFLFMSLLQIFFLFCFFGDLLMTSSTEISEAVYNCRWYLADTSLGKDLLLQTRAQTCKLTA

SDFSEVNLKAFMKILSTAWSYFALLQTLYGAPT-

>HarmOR10

MAVKNTSLFLGRPKKILSAHGVPWPHNNFVILRKLYMLFVMWTQYSFLLFEIYYIADVWG  
DIDAVSEASYLLFTQASLCYKSTAFMVKQSLLELLEIMDCEIFEPKSAEHEKILAAQARKI  
KRLCLFFLTSATTTCTLWAMIPLFDAASKRSFPFRIWMPVTPLKSPDYELGYLYQMVSIIYS  
AFLFISVDSVAVSMIMFGCAQLEIIMDKIQKIKYVFESADSEEGRRNIKTNNEFLVECCKQH  
QTVRFIQLCEDTYHANIFFQLTGTVAIICNIGLRISIVEPNSVQFFSMLNYMVTMLSQFLY  
CWCGHELTIRSENLEWLYQCPWYEQDTEFKRALFIAMERMKKPIIFKAGHYISLSRPTFV  
AILRCSYSYFAVLNRVNT-

>HarmOR9

MLDQFDRCLKSVNLYLKFLGLYLESKDTDKTFVERTRSHRLYFAHLFSLNLEVVAQVLWV  
LEAVITGKSFVEITRIPCLILCLISNFKTSLLYYGRHNNEFIVTMRSLLNQMQVEEKEHR  
FRKNLIDKHVLIITSISKISYVIVLDLLMFALAHAFIIPHYFKTDEVKLEMPFIAYYPFNEF  
DLRVYPWVYFHQVYSAVIAMIMVYGPDCFFFTCCTFIHIQFSLNNDMERIVTEETPRYDK  
TKFKKLAVRHIELMRCVNLEKIFSKSILFNALTSSVIICVTGFNVLVVDNIVMMASFTAFLI  
FGLMQIFLYCYYGDTIMRSSMEVSTSIYNSLWYNIPAADRKGFLIVIIRAQKPCALTADGFF  
KMNLSAFASILSKSWSYFALLKTMYPH-

>HarmOR7

MKIKMSKPLIFDQSIKLGVLFRFSGMNIKNKIVTPLDTIKYRWLYTLNFLVVFSAIIGSVYY  
VILGIKQGKNFIEVTSVAPCLTFSILSMIKSLYHLMYEEHIQELIDLLEHEIRENNREKCKIEK  
EEIIANETGFLNKVINVLYVLNCSMIVVFDMTPIVMIAVKYKTNFEMLLPYLDVFSFIPY  
ELKYWPFAYIHQIWSECVLLDMAAADYLFFTCCTYIRVQFKLLQYDFERMIPDRSISKGL  
FFEENELRNKFTELLKWHQDIIYSSTILEIYKSTLNFNLSLVICLTGFNVTVDDIVIIITFL  
TFLSMALMQVFFLCFFADLMMTASLEITNSVYNCKWYSANIKVKGKILFVQTRAQEPCKL  
TAAGFADVNLNAFMRVLSSAWSYFALLRTVYGAK-

>HarmOR6

MSFRKFLFENEAVDGIKSPSDYLYIKILRFTLDVIRSWPRKELGEPESASFTVFMKYFYLVLT  
IATVVGSIYVHVHSELSEFLAAGLMYLILMSFLDALTVMMLTFSKRYVLAKDFLTKIHL  
FYYKDRSKAAMEIHKKVHLISHLFLSWLLFQMLSGLSLNLTPMYSNLAAGKYRRGGLG  
NTTFEHSLYLYLPFNTSTDVFGYIVACILHWIISYLCSTWFCMFLNFISLMVFNLWGHFKILI  
ITLEEFPRPKSIGTSESAYKYSQEELVEVAERLKDCCINYHREIKNFTNRMSDVFQPMFLVYY  
SFHQASGCLLLECSQMTAQALMRYLPLTIILTQQLIQLSVVFELVGESEKLDKAVYSVPW  
ECMDTKNRKMRFFLMNVQEPHVKAMGLANVGVTTMAAILKTSMSYFTFLRSM-

>HarmOR3

MTLVLDLRFYLIDDGFFSFNLKYLFFVGLWPEKTLTRNQKILYKMYEHFISFLTTTFFIVLAGI  
GTYQHKDDLTVVFCNIDRCLVYNFFFKTIFFIKRNQLRDLIDEIEMSGDEVTEERKCLM  
ANYVMFITGVTAAVIGAFSLLALFEGTMSIEAWLPSPDPMESLMNQILSLEILAFVFPGLCR  
AFAMQGLVCSMIMYLCQDQIHLQKELRDLYVKETEMVMRTKFKNAIRKHIRLMGYSGR  
MENIFKEYFLVQNLAVTVELCLNAVMMTVVGVQQITLLITFLAYLMLALVNAYIYCYLGN  
ELIQSQGIALAAYESTWTSWPVDLQKDLLIVILAAQRPLKLSAGGMALLCIQTFSQALYN  
GYSIFAVLNDAVN-

>HarmOR83bORco

MMTKVKAQGLVSDLMPNIKLMQMAGHFLFNYHSENAGMSNLLRKIYASTHAILIFIHYAC  
MGINMAKYSDEVNELTANTITVLFHAHTIIKLAFFALNSKSFYRTLAVWNQSNSHPLFTESD

ARYHQIALTKMRRLLYFICGMTVLSVISWVTLTFFGESVRMVTNKETNETLTEVVPRLPLK  
AWYPFNAMSGTMYIVAFQVYVLLFSMAIANLMDVMFCSWLIFACEQLQHLKAIMKPL  
MELSASLDTYRPNTAELFRASSTEKSEKIPDVTVDMDIRGIYSTQQDFGMTLRGAGGRLQNF  
GQQNPNPNGLTPKQEMLARS AIKYWVERHKHVRLVASIGDITYGTALLFHMLVSTITLTL  
LAYQATKINGINVYAFSTIGYLSYTLGQVFHFCIFGNRLIESSSVMEAAAYSCQWYDGSEEA  
KTFVQIVCQQCQKAMSISGAKFFTVSLDLFASVVGAVVTFMVLQIK-

>HarmOR13

MKILSDGSDLEGVEKVEDIFYINLARKSMWILDSWPRTPNESVITYRYFVLALNVATLVGG  
AVYLRNNTGVLSSFELGHTYITVFMNCITCSRCIMILSREYNEVMLS FVNKIHLFHHRHKS  
EYAYKTHIFIHKISHFYTVYLLGLALNGLLLFNMIPFYNCYSRGMFRDVIPANATYDHSVYF  
SVPFDYTTKFKGYIAMTSFNCFISYTCTSYFCVVDLTVSLVIFHLWGHMRPLTYHLANFKK  
PASVLESNENTDAIKDHSYTQEELKEVFGKLREYIRHHNLILKFSSEMSNAFGPALLAYMV  
FHQVSGCILLECSQLDMKTLVRYGPLTVVILQQLIQISVIFELLGSSNDKLIDAVYLPWEY  
MDTKNRKLVFVMLRQSQRSIDLKMMSMLTVGVQTMTAILKTSFSYFVMLKTVAEEE-

>HarmOR11

MHLAGNAVGTGITGPM DYKYMKVLRFLRIISGWPGKALGEKTLRIEGMGHAYYNTILSLV  
YLALGIAYLKKNFHRFDLELGQLYIVLLMNMLSTSRAFTLCLSQKYREVAKIFIQKIHLFY  
FKEKSDFAMKIHITVHKISFISAVYLSVLLFIAACMFNLIPMYNNYSAGRFASFDNLENTTY  
EQAISCLYPWNFETNFNGYLAATLSGWYGTILCGSSVSMFDLFLCLMIFNLWGHFKILIYN  
LEHFPRPASEVVDAEGEERSGRTVGSEMYSQSELEEVAVLLRDCIQYHMLIYNFTNNMSD  
AFGMALFIYYSFHQITGCLLLECSQMTAAALTRYLPLTIIMFGEVLLSIIFETIGTMSEKLN  
DAVYKVPWEYMDTKNRRTVLIFLIKVQEPHVKAGGLVDVGVTTMASILKTSFSYFAFLRT  
F-

>HassOR1

MKILSDGSDLEGVEKVEDIFYIRIARKSMWILDSWPRTPNESVIYRYFVLALNITTLVGGAV  
YLRNNTGVLSSFELGHTYITVFMNCITCSRCLMILSRKYNEVMFSFVQKIHLFHHRHKSEY  
AYKTHIFIHKISHFYTVYLLGLALNGLLLFNMIPFYNCYSRGMFRDVIPANATYDHSVYFYS  
VPFDYTTKFKGYIAMTSFNCFISYTCTSYFCVVDLTVSLVIFHLWGHMRLLTYHLANFKKPA  
SVLESNENTHAIKDHSYTEEELKEVFSKLREYICHHNILNFSSEMSSAFGPALLAYMVFH  
QVSGCILLECSQLDMKTLVRYGPLTVVIFQQLIQISVIFELLGSSNDKLIDAVYLPWEY  
DTKNRKLIVYMLRQSQRSIDLKMMSMLTVGVQTMTAILKTSFSYFVMLKTVAEEE-

>HassOR1(2)

GLITWFM LCGDLLFCIFLSHITTQFDLLAVRVRRLVYVPVDKQLVDITYPLGEYCKDYAGR  
NKEMINIFDDNDWEVKHQRELSDIIVRHRALIRLSGDVEDMFSFALLVNFNSSIICFCGFC  
CVIVEKWNEFVYKSFLTALSQTWLLCWYGQRLLLESSEGLSDALYESGWYRASKSVKSSI  
LIMLHRAQKDVHVTTYGFSIISLASYTTHIKTSWSYFTLLLNIYKK-

>HassOR2ORco

MMTKVKAQGLVSDLMPNIKLMQMAGHFLFNHSENA GMSNLLRKIYASTHAILIFIHYAC  
MGINMAKYSDEVNLTANTITVLF AHTIIKLAFALNSKSFYRTLAVWNQSNHPLFTESD  
ARYHQIALTKMRRLLYFICGMTVLSVISWVTLTFFGESVRMVTNKETNETLTEVVPRLPLK  
AWYPFNAMSGTMYIVAFQVYVLLFSMAIANLMDVMFCSWLIFACEQLQHLKAIMKPL  
MELSASLDTYRPNTAELFRASSTEKSEKIPDVTVDMDIRGIYSTQQDFGMTLRGAGGRLQNF  
GQQNPNPNGLTPKQEMLARS AIKYWVERHKHVRLVASIGDITYGTALLFHMLVSTITLTL  
LAYQATKINGINVYAFSTIGYLSYTLGQVFHFCIFGNRLIESSSVMEAAAYSCQWYDGSEEA

KTFVQIVCQQCQKAMSISGAKFFFTVSLDLFASVVGAVVTFYFMVLVQLK-

>HassOR3

MTLSVLDRFYLIIDDGLFSFNLYLFFVGLWPEKTLTRNQKILYKMYEHFISFLTTTFIVLAGI  
GTYQHKDDLVLVFCNIDKCLVDLQFFFKTIFFIKRNQLRDLIDEIESSGDEVTEERKKLMA  
NYVMFITGVTAAVIGAFSLLALFEGTMSIEAWLPFDPMESLMNQILSLEILAFCVFPGPCRA  
FAMQGLVCSMIMYLCDQLIHLQKELRDLTYVKETEMVMRKKFKNAIRKHIRLMGYSGR  
MENIFKEYFLVQNLAVTVLCLNAVMMTVVGVHQTLLITFLAYLMLALVNAYIYCYLGN  
ELIISQGIALLAAYESTWTSWPVDLQKDLLIVILAAQRPLKLSAGGMALLCIQTFSQALYN  
GYSIFAVLNDAVN-

>HassOR4

EDIYHETKPYKLYSIVTFSIYTIMIFLENVAALFGKFPVEVEKNSAVMFSAIHDIVLTKMFLLL  
YHKQSIRKLNNDMSTVGSSEEDHVMRQYKLTTVGIWLYVISVYLSLGAYGVESARRSI  
VEGAPFYTVVTYLPFYDDNSVVALIFRIFFYITWLYMMLPMSADCMPITHLITMTYKFIT  
LCHHFERIRTEFDEDTKIMNKREAIKHRAGCLEGIRMHQKLLCLADEIHRVFGIIMSLOV  
CESSAVAVLLLLRLALSPHLDTNAFMTYTFVCSLFLLLALNLWNAGEVITYQASLLSNAM  
FQCGWHLCELEKDNHRDIR-

>HassOR6

MSFRKFLFENEAVDGIKGPDTDYLYIKILRFTLNVVRSWPRKELGEPESAFTVFIKYFYLLIT  
IATVVGSILYVVVHVTELTFLAAGLMYLILISILDAITVMSLTFSKYRVLAKDFLTKIHLFY  
YKDRSKHAMEIHKKVHLISHLFSLWALFQMLSGLSLFLNTPMYSNLAAGKYRRGGLNR  
TFEHSLYLYPFNTSTDFVGYVACILHWIISYLCSTWFCMFSLSLWVFNWGHFKILIT  
LEEFPRPKSIGNLQTAYKYSQEELVEVAERLKDCINYHREIKNFTDRMSDVFRMLFVYYL  
FHQTSGLLLLECSQMTAQALMRYLPLTIILTQQLIQLSVIFELVGESEKLDKAVYGPWE  
YMDTKNRRMVRFFLMNVQEPHVKAMGIANVGVTTMAAILKTSMSYFTFLRSM-

>HassOR7

MKIKMSKPLKFDQSIEKLGVLFRFSGMNIKNKIVTPLDTIKYGWLYTLNFLVVFSAIIGSVY  
YVILGIKQGNFIEVTSVAPCLTFSILSMIKSLYHLMYEEHIQELIDLLEIRENNREKICIE  
KEEIIANETGFLNKVINVLYVLNCSMIVVFDMPVIMIAVKYKTNFEMLLPYLDVFSFIP  
YELKYWPFAYIHQIWSECVLLDMAAADYLFCTCTYIRVQFKLLQYDFERMIPDRSISKG  
VFYEENELRNKFTELLKWHQDIYSSSTILEIYKSTLFLNLSLSSLVICLTGFNVTVDDIVIIIT  
FLTFLSMALMQVFFLCFFADLMMTASLEITNSVYNCKWYSANIKVKGKILFVQTRAQEP  
KLTAAGFADVNLNAFMVRLSSAWSYFALLQTVYGAK-

>HassOR8

LVQDVFSRSLFVQFGMGSCIICLMRLTMPAPLGYIYIFLGTYLFLVMVLQFIVPCWFGQRII  
DKSNLLAFSAYACEWTSETRQFKSNMRFFIDRAKKPLSITG-

>HassOR9

MLDQFDRCLKSVNLYLKFLGLHLESKDTNKTFAQRSRSHRLYFAHLFSLNLEVAQAQVLWV  
LEAVITGKSFVEITRILPCLILCLISNFKTSLLYYGRHNDEFIVTMRSLLLNQMQVEEKENR  
FRKELIDKHLVILTSISKISYVIVLGLLMFALAPAFIIPHYFKTDEVKLEVPFIGYYPFNEFD  
LRIYPWVYLHQVGTAVAIIMVYGPDCFFFTCTFIHQFSLNNDMERIVTEETPRYDKTK  
FKKLAVRYIELMRCVNLLEKIFSKSILFNALTSSVVICVTGFNVLVVDNIVMMASFTAFLIFG  
LMQIFLYCYYGDSIMRSSMEVSTSIYNSLWYKIPAADRKGFLIVIIAQAQKPCALTANGFFNM  
NLSAFASILSKSWSYFALLKTMYPHE-

>HassOR10

MAVKNTSLFLGRPCKILSAHGVWPHPNFVILRKLYMLFIMWTQYSFLLFEIYYIADVWGD  
IDAVSEASYLLFTQASLCYKSTAFMVNKQSLELLEIMDCEIFEPKSAEHKKILAAQARKIK  
RLCLFFLTSATTTCTLWAMIPLFDAASKRSFPFRIWMPVTPKSPDYELGYLYQMVSIYISA  
FLFISVDSVAVSMIMFGCAQLEIIMDKIQKIKYVFESADSEEGRRKIIKTNNEFLVECIKQHQ  
TVERFIQLCEDTYHANIFFQLTGTVAIICNIGLRISIVEPNSVQFFSMVNYMVTMLSQFLCY  
WCGHELTIRSENLEWLYQCPWYEQDTKFKRALFIAMERMKKPIIFKAGHYISLSRPTFVA  
ILRCSYSYFAVLNRVNT-

>HassOR11

MYAGNAVITGITGPMYKYMKVLRFLVRIISGWPGKALGEKTLRIEGMGHAYYNTILSLVY  
LALGVAYLKNFHRFDLELQGLYIVLLMNMLSTSRAFTLCLSQKYRQVAKIFIQKIHLFYF  
KEKSDFAMKIHITVHKISFISAVYLSVLLFIAACMFNLIPMYNNYSAGRFASFDNLENTTYE  
QAISCLYPWNFETNFGYLAATLSGWYGTILCGSSVSMFDLFLCLMIFNLWGHFKILIYNL  
EHFPRPASEVVDAGEEERSGRTVGSEMYSQSELEEVAVLLRDCIQYHMLIVDFTNNMSDA  
FGMALFIYYSFHQITGCLLLECSQMTAAALTRYLPLTIIMFGELVLLSIIFETIGTMSEKLD  
AVYKVPWEYMDTKNRRTVLIFLIKVQEPHVKAGGLVDVGVTTMASILKTSFSYFAFLRTF  
-

>HassOR12

MEDEPLLDKTVKKIEFLFRCTGINIKSGTKTRKDMIKSRTVYIINFLWLNIDLGAIVWFFT  
GIANSKSFTELTYVAPCITLSFLGNLKSFLILREKHVDKLIQVLRDLEINEKSRPKSEETDAI  
IKYEHNFVTTVISVLNVLYFVLLVAFALSPVSLVALKYFTTNELELLLPLIVYFPDPYDIRY  
WPWVYLRQIWTEVVIIIDICTADYLFYTFCTYIRMQFRLLKHYIERVIPEEDDAGRLTNIEQ  
VRAEFVLLIKWHQDLISSANMLETVYTRSTLNFVSSSVLICLTGFNVMAISDVAFVATFLS  
FLFMSLLQIFFLCFFGDLLMTSSTEISEAVYNCRWYLADTSLGKDLLVQTRAQTPCKLTAS  
DFSEVNLKAFMKILSTAWSYFALLQTLYGAPT-

>HassOR13

MKILSDGSDLEGVEKVEDIFYINLARKSMWILDSWPKNPNESTTYRFVVLALNVTTLIGG  
AIYLRNNTGVLPSFELGHTYITVFMNCITCSRCLMILSKKYNQVMSSFLNKIHLFHHRHKS  
EYAYKTHIFIHKISHFYTVYLLWLALNGLLLFNMPFYNCYSRGMFRDVIPANATYDHAUF  
YSVPFDYTTKFKGYLAMTSFNCFISYTCTSYFCVVDLTVSLVIFHLWGHMRLTYHLANFK  
KPASILESDNTDAIKDHSYTEEELKEVFSKLRREYIQHHNLILNFSSEMSSAFGPALLAYMV  
FHQVSGCILLECSQLDMKTLVRYGPLTVVIFQQLIQISVIFELLGSSNDKLIDAVYLPWEY  
MDTKNRKLVYVMLRQSQRSIDLKMMSMLTVGVQTMTAILKTSFSYFVMLKTVAEEEQ-

>HassOR14

MSGIRDFFIFNLEAKEGITNPTEYPYMILCRHLLTVITCWPKELKEGLDTRAKLRAKIWVTF  
QKIFHLNGCFITTIGMAMYIALHKKSMSFFELGYLYISLLMTVVIFSRLTTLWCWNPEYQAVA  
TDFLTKIHLFYKDDSDFSMQTHKQVHKISHLFTLLTGQMVAGMSLFLNTPMYNNFSTG  
KYKKGGLKNSTFEHSYFSYPFNASSDVSGYILSNIFHWIISYLCSTWFCTLDLFLSIMVFH  
VWGHFKILIHDLNHFPRPLSMISFRLDHSNITLTNEIYSSRELQVSRNLNKCVEYHRRIVSF  
TDKMSEVFGPMLSVYYGFHQTSGLLLECSQVTVEALVRYLPLTIIVFQQLIQLSIIFELVG  
SVSDKLDKDAVYGLPWEDMDTKNRKTVAFFLMNVQEPVHVKALGLADVGVTSMTAILKT  
SMSYFTFLRSK-

>HassOR14b

MAGLRDFFFNFEANEAITTPTNYPYLIIRRSLSVIKCWPKKTENLEAGAKLKAKVWGM  
QNVLHLGFCIFTATYIAIHKKNMTFFELGHLYITLMISCVVFRLLTLTFQEEYQVVV

NEFLNKIHLFYKDNSEFSMQTHKQIHRISHLFTLYITGQLFTGLSLFNLTPMYNNYSAGK  
YSKEGLKNSTFEHSLYYSYPFDVSTDVRGYIFSNILHWFFSYIVSTWFCTLDLFLSVIVFHI  
WGHFKILLHDIDNFRPSKMVSFRLENTNVTISNENYSTKELEQLAAKQCIDYHREIISF  
TNKISDVFGPMLFAYYGFHQASGCLLLECSQMTPEALARYLPLTLTLFQQLIQLSIVFELV  
GTVSSKLNDAAYGLPWEDMDVKNRRTVAFFLLNVQEPVHV KALGLADVGVTSMTAILK  
TSMFFTLRSM-

>HassOR15

YLSGQMMLGLFLFNVTMYSNYSAGKYKSGGLKNSTYEHALYFPWPFNASTDFRGYVV  
SNILHWLLSYSCSSWFCVVDFFLSLMVFHIWGHFKILLHDLNHFPRPSNKISFMIEDSCVTI  
TYEMYSRNELDQVFHRLNKCIDYHREIVSFTDKMSEVFGPMLLAYYGFHQASGCLLLECS  
QMTVAALVRYLPLTILFQQLIQMSIIFELVGSVSDKLDKDAVYGLPWEAMDTKNRRIVAFF  
LMNVQEPVHV KALGLADVGVTSMSAILKTSVSYFAFLRSL-

>HassOR16

MGLRQFLFENEAVEGINSASDYHLHIKVLRFMLVIVNSWPRKEIGEPESPKFSEFVKYLYLVV  
TFLLSAGFILYVVKHNSLFTLETGHMYIVLLMSFIDVSRVATLTMSTTYREVARDFLTKIHL  
FYKDRSKQAMETHRAVHKIAHLFTLWLCQMLSGLSLFLNIPMYSNYATGRFSGEVSKN  
STFEHSMYYPFDTSTDIRGYSIACILHWIISYLCSTWFCMFDLFLSLMVFHLWGHFKILN  
YTLNDFPRSSKVEAAKYSEEELVDVAARLKDCIVYHREIILFTDRISNVFGPMLFLYMFH  
QASGCLLLECSQMTAALIRYVPLTVILTQQLIQLSVIFELVGSSESDKLDKHAVYGVPEWEC  
MDVKNRRSVAIFLANTQEPVHV KAMGVAKVGVTSMAILKTSLSYFMFL-

>HassOR17

MFLRSECARSVAPHVRVLRVGFRLGAALSSRGRAERLALRSYHALALAATSPLYVLQAV  
YAYQERGMMDKLSQVMFLMLCHVTCVVKQIAFHVDADRIDRLIASLDEPLLNQCAGERG  
ALLRGTARGAARLLRITYAGCAVATCVLWIVFPVIDRIQGISFEFPFWTGFSYDHNAVFTFVL  
LQSFYCTNLVAIGNTSMDAFMATILDQCKTQLRILRINFESLPERARALHVESGENYDTILD  
KLFVDCLVHYNKITEMCTELHDVFAVPLLQFGVGGWILCMAAYKIVSLDVLSIEFASITLF  
ITCILIELFICYGNEVTVESERSQSLSMEWRRARLTFRRSLVLMERAKRPLRPAAGR  
VIPLSLDTFVKILKSSYSFYAVLRQTK-

>HassOR18

MEMKVDVLPKYYKGFNETFKLCAFSLAFALYPNRTTALRRCITITLIVTFCGGQLFWFIT  
YTFKCLYTLDIYNFARNMTLAVVLVFFIKTYVVIYATSKFAPLLDKISDDLLEANNLEEF  
QVLYDDHIKIAKVGEISWLLIPTIMSALFPIYAGALMTIESIQTDYERRMVHDMELLFVED  
IQSETPFFQCMFAYNCVQC VVLVPNYCGFDGSCFIATTHLRLKLMKLVNKAFKYSKS  
RQELRMRLYDSIKDHQDALDFYVQLQNVYGPWLFVAVLLTSFMISFNLYRIYLLQRIDPKY  
TSFGVVGVLHIYLPARYASDLTKVSEEIPDDLYLAQWEAWADPSITKLLMFMITRAQKEMI  
VTGMGLVVFNMEMFKSILQTSYSFFTLITA-

>HassOR20

MDDELEFKPFHETYRLITFSLCIAMIYPNPRTEKWRLISIPILIATVAPVAIMIFLDMYKCWT  
NGDIVNIIRHSTVVGPFLLGGFFKMILMYHKRIQAKQILDEFDRDHMFNTVAETYKAIARA  
SIRNCQVYSERLWACLVTTCVMTFPVMAIVLNIYNFMFKSEPTKYMIHDLEKPFKEPEER  
FESPYFELLFVYMFYAILYVNFYGYDGGFGLCVNHACLKMELYCKALEEAMMADREE  
VYGRVIAVIREQCRMFRYVDLIQDTFNIWLGIIFIATMIQICTCLYHITEGYGFDIRYMIFVYG  
AVVHIYLPARYAAKLMKAMSMETSNRFYCCGWERVDDERVRKMIVFMIARAQVPNEITAF  
NMMAFDMELFSLQTSYSMFTLLRS-



>HassOR21

YKSSNTTEFLINLNKFGFIFGLPNFWIEELDFSDTFLKIIIGRLNKYGNWLVFGLILAEYGYF  
TQKNLDERQTSDFILFIISHTIITGFRVRISHQEVQIRNVMYKLGIALKEVYNDSEADQMIK  
RSKFFSYALVLCIMSVMYTVAAVMRVRIRAGVTFTTITVYPTVEDRSTLSDVVRAIFYII  
WCIYLTRVFAVYTLVICLTIAMSHQFKNITSYFYSLSNIFEDEQMTQTEKEQEYERSFRAGIK  
IHSETLNCTGDIQRMCRDVFSGQIIFNLTLIVLMYQMVNSPRNLTNALTLVIAGLTILLSTG  
FFMWNAGDITVEAQLLPTAMFSSGWENCGRDSSVRVRKLVIAMMQAQEPVVLTLGLLI  
ALSYQSYVSIVKSSYSVFSVLY-

>HassOR25

DAIQNVFSATLFFQFSFGAMTTCVIMCSLLMPATMEYRVFLVIYLISMAGQILVPSLLGTLT  
HESAELVTAAYNTEWIGRSESFKKSLMLFRQRAATPITITGLKMFPLSLVSFIAMKTTYEFF  
TLIRNAQET-

>HassOR26

EVESIFGEAMVVQFFVMAWVICMTMYKIVGLSIYSAEFVSMAYLGCMLAQLFIYCYFGT  
QLKVESELVNQSIYCCDWMKLSPRFRKQLLVMMQFCDRPIAPRTAYVIPMSLDTYIAVLR  
SYTLFTFLNR-

>HassOR27

FFVATLTLCSVAVRLKSEDMSVMQLVSLIQYMCGLTQLFLFCRYGDAVLHESTMGMGEG  
PFAAASWCLSPRVRDLMLSLAGMMSQRHLRAGPFSFIDLPSFIQVVRAAYSYYAVLGKK  
E-

>HassOR28

LVSGYVEAQMLALTEELLHLYEDAEAEYKTNQAVSVLDHNNERNLKSKAINEYVEKRL  
KEIIQSHGRNINLLHKLEHVFSGAIALEFLLLIGLIAELLGGLNTYLEVPFALMQVGMDC  
FTGQRVMDASVKFE-

>HassOR30

SVDRKHGTKEALSQNYKKLVDCIKHHQAIVTFTTELVENAYHPYLLFQLVGSVGIICMSALR  
ILVVDWRSMQFFSILTYVSMISQLFVCCWCGHELTATSEDLHTVLYKCIWYEQDVKFKRE  
LCFAMMRISRPLVLRAGHYIILSRQTFVAILRMSYSYFAVLNQT-

>HassOR33

PMLLPGRHFMDVVLLYGLEPMFETPNYQISFVLMGSSCVLICYLCANISAFIIVTGYVQ  
AQLALSEELTHLWEDAENYRGTELEDITDDGDHNDKNKDAILNDYVTVHLKDIKSH  
AENINLLGQIEGTFRGAIAIEFCLLVIALIAELLGGLQNTYMEVPFALMQVGMDCCLIGQRV  
MDAGAVFEDAVYDCKWERFNKKNMKTAMVLLLNAQRPMPTISAGGVTTLSYVSFMTIIS  
IYSTYTLRSTMHEP-

>HassOR35

GGLAETIANMLTVLNAVFTIFLLSLSGQFLCDTSSEVADAAYESYWYESDHKVKKLILSIIR  
AQRPSYLSALGFSELTKSFSKILI-

>HassOR37

WKSMDLAKAAFEGPWMNSDRQTNMFIILLERCKRPLRLSAGKIFTLSDTYTVLINWSY  
KAFVMRNMKK-

>HassOR38

MYTYVKIAVFWMNKDKVISLLEYLYCKEFKPEPEHRDIITKSIKSARFVMTYYSTMCVG  
AVSVGIIIMPLTENFDILPTNVEYPPFDVYRSPAYEAVYIHHIYKPATCIIDGVMMDTILAAFV  
SAIGQIEILAFNLRNFDLVAERQRRDLAQNKYIEEYPAQHYVRSVLKECIRHHNCIIRYVS

MIESAFSLASALQFMLSVMVLCLIGIQFLSIE-

>HassOR39

ICHSLFIFLVYCYQGQRLTTASEKLEMAVYYCGWENLRVKERKQVLMMLKRAQEPVIVYA  
AKVIPIRLSTFAT-

>HassOR40

LEMAMRNLSLTMSTVCVFKACNLVIWQNSWKELIDYVSELERSQLSKNDAVVNKIISGY  
VKYARRVTYLYWALVTATVVTVILAPLFIYLSSPNYQESIKNGTAPYPEIMSSWTPFDRSRG  
LGFCGATLYQMLACFYGGTVVANFDSTAVVIMTFFTGLKVLVSVNCERLFGDGNELVDYD  
EAVKRIKECHLHHYYMVEFSSVLNSLLSPVFLYVIICSLMLCASAVQLTTEGTGNMQRIWI  
AEYLMALIAQLFLYCWHSNDVLYMSNKVDDGVYSSA-

>HassOR41

CVTAYQITIETSPMQRFLTTEYL VFGVAQLFIYCWHSNDVLFASADLMRGPYESIWWTRSV  
RYRKDLYLLAAQFNKT VVFSAGPFTKLT VVATFISILKGAYSYYTLLSQSQMK-

>HassOR43

PYDTSKSPAYELTYINQSSAVTLAALVNVCLDTLVTSLIAVCRCLRLVALSLRSLCDGIPLP  
DKQLISPTTEERIVLSRLSQCIIKHESALKAARQIQRCFSLPILAQFAVSVVIICVTAYQLAMEL  
NNRNWFRSIPMVAYLLCMALEVFLYCYQGNELLEESSEIAGAAYECPWYQCSVRMRRTLL  
IVMVRTRRELRLTAGGITLSLACFTSIIKASYTFFT VVKQVEDRNP-

>HassOR44

VIMSEVIMQAHLIPLVCQFNVLANCFENVFECAAEPDINKHELKNNTFVEKYRKRLG  
DLVKQHREILDQTTDLKTILSAPMLGQLACSGLLICFVGYQATATIAENLGKFMVSLFYLG  
YNMFTLYIICRWCEEITIQSQRIGQSAYFSGWESGVSHVPGARATIILVIARSNKPLVFLAGG  
MYTSLTSYTSLVKASYSALNILLTTKHE-

>HassOR51

EALARYLPLTLTLFQQLIQLSIVFELVGT VSSKLNDVYGLPWEDMDVKNRRTVAFFLLNV  
QEPVHV KALGLADVGVTSMTA-

>HassOR53

EVKERQGS AIVIMSMFGCDSL FYGLCVYIKTHFQLLGLRFENIVGATKSETQRNLAKAVVR  
HQELIDL VNMELLYSKSSLVNIIT-

>HassOR54

KHHQFLMNFHGKIREMYKVIFGAHFLSMTVVLVTTLQTMNVWDYRNTILTGMMSGIMPLF  
LYCFGGEKLISAGLQMSSAVYSCGWEMMEAKQAKVVLLMLCLLQRPLYLTAADIFIMNR  
ETFGDGAQVVYKIYAVFN-

>HassOR55

CSMTICGSVVQFTSKEATASQKLWVIQYTCGLVLQLFLYCWHSNEVTLQSKVVDGGIYNS  
NWWKSDVRVRKQLILLAGKLNRPVLVDAGPYTTLSVPT-

>HassOR59

SHFVMITDLKMQTHLLHLLCQFTVLVDCFQNVLRDCRIGFEDVAENNLVYEKRFAEKYTK  
RLGDLVKQHKLILSQT MNLRD TLRSPMLGQLAASGILICFIGYQATTTIAESPFQGLMSAFF  
LGYNLFGFYIICRWGEEITNQSEKIGEAIYCSGWECGLTKLPGVVRSTIMYVIARANKPLVLT  
AGGMYNLSLTSYTSLVKTSYSALT VLLQFRHE-

>HassOR60

AAYLNVAKDTLVAALIAQCRCRLRLLLGYALRTLDKGMENEAYTFSPEQEKTLSLRLGSCV  
VQHQKALDVGKELQECFSEPTFAQLTVSLIICATAFQLSMGP-

>HassOR62

LWAAWVCVFSVYGPDCFFFTCCTFINIQFRILQDNLKEIVKVDARNRPDVTTETFKAELVQ  
LVNDHRELIRCVNLETTYSRSTLFNVVTSSLIICAAGFNLMVIENLALMAPFTSFLTFLGL  
QVFFYCYYGDY-

>MsexOR-1

MIFMDDPLSKSIKDPDRDYRYMKLFRSTLRLIGSWPGRDLKEEGATKYEIAPLYWVLVIKIT  
CFLLTIIYLIENTNKLGFVEIGHVYITVFMITLSRSITLSLNPKYRRVMTKYITKMHLFY  
KDMSDIALKTHIRVHKLSHFFTMYLSTQVVLGTVTFNIVPMYNNYKVGRFENNILVNDY  
ELSIYFKTPTKFLSTLNGYIAITTFNWySSYICSNFFCMFDLALSLLIFTVSGHFKILHNLN  
FPLPAVVSDDSSKVLKTDEIQAPLYNKTEKKDITLRLKQCIDYHREVLEFTQDISEAFGPMLF  
VYYLFHQVSGCLLLLECSQMDAAALMRYGLLTAVLFQQLIQLSVVSVGTVTGYLKDA  
VYNVPWEYMDTQDRKTVCIFLMNVQEPVHINALGLAKVGVQAMAGILKTSFSYFAFLRT  
VSN\*-

>MsexOR-2

MTMLLRKMYSTVHAILIFVQFVCMGVNMAMYADEVNELTANTITVLFFAHSIIKLGFLAF  
TSKSFYRTMAVWNQNSHPLFTESDARYHQIALTKMRRLTYFICFMTVMSVVSWVTITFF  
GESVRMIANKETNETLTPAPRLPLKAWYPFDTMSGSMYVVFVVFQIYWLLFSMSMANLL  
DVLFCAWLIFACEQLQHLKAIMKPLMELSASLDTYRPNTEAELFRVSSDKSEKVPDPVDM  
DIRGIYSTQQDFGMLRGTGGKLQNFVQNTVNPNGLTQKQEMLARS AIKYWVERHKHV  
VRLVASIGDTYGTALLFHMLVSTITLTLAYQATKINSINVYAFSTIGYLCYTLGQVHFHCF  
GNRLIESSSVMEAAAYSCQWYDGSSEAKTFVQIVCQCQKALTISGAKFFTVSLDLFASV  
GAVVTYFMVLVQLK\*-

>MsexOR-4

MKFFVDGSEIAHITKPQDIQYMQMLKFFTNSLAGWPPIEAVEGIDGKKNFYWRNGLVVIAY  
AYFFGQVFYIYRYINDYTFLVMGHSYITVLMTIVTIARHTLPYFKCYDDTTADVFHNIHLF  
NYRNKPGYYKEFHLKIHKISHAFSVYLCTLLVTGPSMFNGIPLYNNYASGAFSFRNSPNT  
YEQAVSLLLPFDDTNNFKGYFVFLANCCVSYISSCCLCIYDLLLSLMVFHLWGHLKILTK  
TLDNFPKPGFLNPQAIADPNKSLKFSDEELKVIHKKLGECVAHHQLISNFSTRMSNTFGLS  
LFIYYGFHQLSGCLLLLECAQLEAAAICYGPLTLVVFQQLIQLSFIFELIGTVNEGLTDSVY  
CLPWEAMDQGNKKIVFTFLRQSQKSMNLKALNMLSIGVQTMAKILKTMTYFLMLQTIA  
KDES\*-

>MsexOR-5

MKVPLKFRPTETTKLLDELNKLFIYFAFRGFVVEEVKLPKTFVKIYDAMY PALNVSLVIF  
CALQIGAHFTQKHLNIQKININIMGIAQPLTKLCCLNCMYYKEECKQVLYHLFVAVKEYI  
NDEETEKMLVKKLKFSLWVYMFSSVSTLLYGMALIEMVRSSTFGVGTVAWPDTTDT  
ALAACARVYLYFFWIVYTSTGSMVILMVLTFMGLTYQYKNLQKYFENLNSIFEDKQVTH  
EELEMNFEKALQKGIAHSDTLWCVNQCQTICKRINMAIVLINTGILIVLMQGF LSKDDI  
LKVGTCCLIVLGMCLMILAFFMWNAGDVTVEAQKLSDAIYSSGWYNCYGKRSARIRSLV  
IAMIQAQEPVVFTAFGVIELSYETYVAIISAYSVFSVLY\*-

>MsexOR-6

MEETKKYAPTDTTKLLDKFNKILYVFGFRGFWMGDVKLPKTMKIIDILYPVLIITQGTFG  
TLQLGAYFTQKHLNSVQKIDALVMGFGQPMMLLYCLNCRYKKACREVFYHLFVVLKT  
VYNDKETEENMVKRLKLYFGAYLIFSLLVLLYGSYASVETVRKGATFVTVAWPDPVTD  
TSKLASYARVGIFMYWSVYSFTTSVVIIIIVLIIFLGLTYQYINLQRYFENLNSIFENDRLSHEE

MEKNFEKALQNGIKAHSETLWCVKQCRMICSAINAGVILLTTGTLVILMPAILGSKDDLLE  
AMMYLMVSNIVLMIMAFFMCNAGDTTVEAQKLPNAIYSCGWYNCYGKRSARIRSLVVV  
AMIQAQEPVVFTGFGVIELSYENFVTHIKSAYSLSLVFH\*-

>MsexOR-7

MDEPEFKPFHKTYQIITFALSVGMIYPNPATDKMRLASIPISILTILPLACMIFLEMYQCWTQ  
GDIVNIIRHTTVLGPFLGGLFKMFLMYHKKRQAKQILDEFERDYHLYNSFTGDYLNARD  
GIRNSLIYSEGWAITVTTCVMTFPVMAILLNMYNYTFKFQATKYMIHDLNKPASPEAR  
FDSPLYEIMFFYMMYCSLLYVINFIGYDGGFGLSINHACMKTNLYCKMLEDAWKAEPNER  
YRRVVAVIDEQCRMFEFVNLIQDTFNIWLGIIFLATMIQICTCLYHITEGYGFDLRYMIFVSG  
ATHIYLPARYAAKLKAMAAETATHFYSSGWERNDRRLRNMLLFMVARAQTPLOITAFN  
MITFDMELFVSIMQSSYSMFTLLRS\*-

>MsexOR-8

MAQTLFDKSLSKLSMVFRWSGTNIAIGEAAPTNNTKRNRCIYSFNFILQNTNVLGGIYWFIS  
GLKTGKSYTELTFIAPCIISILSVMKMSMIIYEKKVYQLMENLRMMEAHERNRENTAERR  
KIIKGVNFLNLVINVLCGLYLIMFVCFAFSPLVLMILKYMKMNEIEFKLPFFIAYPFDYNI  
KVWPMVYLRQLGTEIVTVSNMCVADFIFCFCYSITIQFRLQYDIEHVITGTRESIYNDEM  
HGGKIRNKLVEIKWHQELIMCVNLENISISMLFNFISSSVIICLTGFNV TENHDIVLVITFI  
TFLFMGLVEIFLLCFFGDMLIDASSDVSDAVL\*-

>MsexOR-9

MTSPDSKIKEFFRKFTLITYLCGLADFWIEDLDLPTQFIKCYDTFCKIFNNFLYLYVIAQILSL  
FTQHNLTQKQRNYQLMFCVAHPFVVTFTPLIAKHRKKLQSVLFRLLVSLKLVYNDLDIEKE  
MIKRIKFYLFVSAFPWISMISYCVDSYVQVVTSGTTFNIMILAWPLVDDHSVIASLARFIY  
HIIWILFETRVTAAYVMVISLTTICISYQYRNLRSYFESIHRVFEEDLTQKEKEKKYEKLLKIGI  
QAHSDTLRVTKDGTACSAVLSAQVLFNTVFLVILMYQAVVNNENRSLVKMFSTLCTVIT  
LLFSTWFFTCNAGDVTYEASLIGTAMYTSGWQNCRGLSSLSIRKLLVIALARAQEPILKGF  
WILTLSHQSFSLIVKFSYSIFSLLY\*-

>MsexOR-10

MALHFDDTIKKNDFVFRYAGINIKSGERKKNDIAKSRRMYVFNFFWLNIDVYGSIFWFDG  
LRMGKDFIGLTYIAPCISLSTLSLIKSLFLISSEKHMFKLIDNLRELETRENARPRS VQKEEII  
NTEIKFLNYVLKTINILYVVLVMTFALSPLIIIAIKYMQTGEVELILPFLILYPFDYNIKLWPF  
VYLHQFWSECVTLNICCSYIRIQFRLQHDFERIISAPSGNRRVRENDFKAKFIELVKWHQ  
DAIESVSLETIYSKILFNFMSSSLIIICLTGFNITVVNDFAFVVTFLSFLFMGLVQVFFLCFFA  
DLLSESSVEVSNVYNSQWYMADSNIGKQLLLVQTRAQKPKCLTAWGFADVNLNSFMRV  
LSTAWSYFALLQTVYGGQ\*-

>MsexOR-11

YSFRKVFLNETLGYPHILPCWAVLDELSFLGYLLTIVAEAVAAIYCVVVHITFDITAVGIMIFI  
CGQFESLRRCSESIGGKGVKVCNVTAEARARFRIKKCHRIVILIHSEIKELKELIKNILGVY  
FFVATFKLCSLAVRLKTENMSKMQLVTLVQYLGASITQLFLLCYGDAVFNESAITMGQGP  
FGAAIWCVSPKIRRDIVILGMGMMKPHSLQAGPFVNLNLPFIQIVRTAYSCYAVIGPK\*-

>MsexOR-12

MEQAKREIDESLKLSAFCMRRIGLSFEKHKNASAHLRQQLMFALSVCISICYHVFSEIMYIG  
LTLANSRVEDVPLFHTFGYGALSIAKVFWALWYKKDVFSQLLRELVGIWPTPPLEDEAQA  
IKDKSLDALRITHKWYFAVNVLGWVFNVTPIAVYFYRLWQDGAQVGYVWVSWYPFD  
KHQTIAHVAVYIFEIFAGQTCVWIMVSTDLLSGMASHISMLLRMLKRRLESLASTEKTDD

EYYHEILENIKLHQRLITYCYDLEDAFSLSNLVNIVLSSLNICCVFVIVLLEPFVAVSNKLF  
LGSALIQIGMLCWAYADDIFHANADVAAAAYNSGWYSTNARCRRALLFLMQRAQKPIAFT  
AMKFTNISLVTSAILTRSYSYFALLYTMYNEN\*-

>MsexOR-13

MENNRNFRQAIYSCGWEEKQPDKGVRQLILFMMTRASLTLGITTVFYEICLDTFAEMCRQS  
YAIFNLMNAAWS\*-

>MsexOR-14

DRWIQWKVTAVSAFIGVCALMEHILSMMSAIGLHCAPSQYLRKYILNSHGFLLRINEYSLW  
FAIPIFILSKISTMLWNFQDLMIIIVISMGLTSRYNRLNMYVGHIIKIERKLSDSPKTGSDLHVH  
NEIWRRIRESYVRQAELVGMVDKEFGALILLSNINLFFICLQLFLGLNATARGALINKLYY  
FISLGWMLFRACTVVLAASNVHMHSKKALVFLYSCPKSGFNIEAKRLKHQLIHDHVGLSG  
MGLFSLKRQLLLQVAAVVMKYELVLIQYDK\*-

>MsexOR-15

MLYIYTRWNNIAFSTHGTIFTIVPITFLILTQVLSAQKESYRRLMKTFLQEIHLNFGSNSYM  
KQRAVEVEKYSRYLATFFFVFLVVYRALWTIVPIVFNLKNKAIENKEIPLKTCFYMWLPP  
DYEHEYKYWVITHIANSTLIALGCIVVTSYDTINYSIVFHLIGHIKSLKHLIKTNISQNLSD  
ETKRGLVEVIRYHCFVLKIFGEIERAFGINVTGNLYNLIADSLLYHMLGDKENKLMYG  
VMLLVFMGGLIVMTLILEEVRRTFDIPQTVYDMPWEKMSVSNQKIVVIMLARTQPTLEY  
KSAGGLKAGVNPTIQIISTFSYYVMLKSSL\*-

>MsexOR-16

MGIFVQNVNRSRFLCTMLKLTGFLVPNGVIEFTVFHNIYWFFWMMFVVGINVTQTGDLI  
QVWGNLSLMTSAAFLLLSDVAMMMKIINVVMRGRVIQTVIDGMDLELRSEARAKGRKII  
KECDDQTRHLYLFLCLSGVTVLGWAGSAEHNKPLRAWYPYDTSTSPAYELTYIQNQL  
ITTGQNTIDLRLRSCVLKHQAALRAASQIQECFSEPIQTASTVVICVTAYQLRIEIHQSNL  
VRVISMAYLLCMMLQVFLYCLQGNQLAEESSNIAEAVYECPWYRLPLPLRRSLLIMVR  
SRRVAQLTAGGIATLSLACFTSIIKVSYTFFTVLQSVED\*-

>MsexOR-17

ELDDLGDAMLLTYIFGSVFICLTAFTATVVGDIYMTVRYVSFFLSLLVEVFVQCIIQILID  
HSEKFERAIYSADWPHSELKTKKMLLILLTRAQKPFVYSANGYLVMNLDTFGCICLSYQF  
FNLLRTAYN\*-

>MsexOR-18

MLSFLKNLEDSERPLGPNYWILKKMGLLLPKNKISKIFYILVHEIVTLFVVSQYMELYVIR  
SDLDLVLTNLKISMLSVVCVVKVNTFVFWQSDWKQVLEYVTKADMFERQNQDVPKSNII  
NSYTKYCRRLTHFYWGLVFTTFLTTNTPFMRYLSSSNFRNNFANGTEMFPHFSSWMPFN  
KNHSPGCWITILWHVLLCAYGAAIMAAAYDTCVVVIMVFFGGKLYLLRERCSNMFKNSDE  
NASEATVKQLHGIHIQLIKYSRLFNSLLSPVMFFYVMCSLMLCASAYQLTSATNAAQKL  
LMAEYLVFGVAQLFLFCWHSNDVLIKNENVTLGPYESNWSASLRQKKNVLILSGQLRIS  
NKFSAGPFADLTLATFITIIKGAYSYYTLLRK\*-

>MsexOR-19

DLIIACIKHHQAVKRLVLKIEDTFHSSVFCQLCTAVLIICIIGIRLSQDSPNNASFYGIVSYLTL  
ILSPLYLNCWCGTEITDRSLDFRDWLYEVPWYDQDKRFTSTLSVLLQCTKKPLEFRAGHY  
VLLARATFVSVLRCSYSYFAVLQQANEG\*-

>MsexOR-20

MAVSVLKRLTYGDNIFEFNKYLMVGLWHNENWTRNQKLLYKIYDNTLDVLGLIYLTL

TAIGHGNMDDITAALAGVDKSLVAYNFMLKIIVFHFRKHQLRKLVEIISGDVVPPEEHKI  
LVAKLSLATTITITTIIVTIFTGISVLGELPAKVWLPFDTSKNFMNLLAGVQICLVTFGVPCY  
RGLALKCFVSTMI FYLRDQLIDLQVKFKELDNFKDAEEVVRTNFKKIVKKHIRLIRYSKTID  
NLLREYFLIQNLAITIEVCMNSVTLLTSEGISSAAYNTSWTSPVDMQKDLLTVIIVAQSHF  
KLTAGGMAVMSLETYAQTLYNGYSIFAVLIDAVN\*-

>MsexOR-21

MLVGFWHNENWTRNQKLLYKIYDLTMHVFGITDIALSAVGIYQTKHDLTVALAGVDKAL  
VAYNFMFKIIGFHTKDQFKKLVKEMIASGDVVPENHEILMAKLSLATTITSTIIVIFTGSS  
MMVGDLPARVWLPFDISKSMHLLAGVQFCLVIFAIPVCYRGLALQCFVSTLIFYLRDQLI  
DLQDKFKELENFQNVETELRRNFKKIVKKHIRLIRYSKEMDYLLREYFLIQNVAFTTEVCM  
NAVILTLIGFSQKTLAINFIAFLITALIHAFVYCYLGDEIIEQSKAYRLLLLTIQAGPRGPSTMQ  
KNLLTVIIAAQSHLKLTAGGMAVMSLETYAQTLYNGYSIFAVLADAVH\*-

>MsexOR-22

MGWIERIKGFILKKSFDLDRPDICLYNFHPQLRILFALKGIFFNKQNSKLKIILPTYFNLLTIL  
GMVFEGMFAHRGLTIKDYSAIESFLYFIILTSTPLVYLCLFYHKDKIQLDDMNNEEFKFC  
SLGPRHRTPFLKGQLLIWKLCYAWYTLSTGTAFMMFPVMALVYQTLFVTHTEKTIRPLA  
FTMWLPNDPPYRTPNYEIFLFFEMNYCVIIVQTFGVYIYTLFHLLLHHYFILDMMILDFEAI  
FDGLDESVAALPSKHPRRREVQLILNARIKRIVTWHNSVIKTINTLSIVYKPALVFQILLSSI  
MVCLIGYQIAESLDNGVIDFLFIMLVCTCMQVWIPCYLGTLLRNKVFVAVREACWNCGW  
HRNSLGTILRLDILIIIQRTQVPLLIKLSDMSTVELETFSSIMSAAYSYFNMLRNSN\*-

>MsexOR-23

MSSFCQTDIFKPNFFFWKCFGIWGGRTENKNYKYYSFSYLFVTLFVFNILLTINLIYTPLKIE  
SLIREVIFYFTEIAITVKVLMILVMRSKILDVFNLLDCKEFQGDDEESKQIETNHSFYRTCW  
KLNAVLSNISFASNVFAPLFINLIWTAKIEFPVCKYYFLSDEMMDKYFIFWFIYQSIGIYGHM  
MYNVNVDSFIAGLLLMAITQLKVLNAKFTKFKLEKRHEKHHILIQNKIQILRLNRYLKHY  
DCVLRyceiiQDLLSVTMFVQFGMASAIICAIMCGLLLPSTTETFMFMVTYLFAMTIQIFVP  
AWLGTQLSHESCG\*VFAAYNCEWIPRSMFSKRSIMIFVERANNPIQLTGLKMFPLSLATFTS  
IMKTAYSFFTLFRNLQDHDDGAN\*-

>MsexOR-24

LLSLTKYFFVLNAVLSVYNFSSPIIMLYQYIAKNKVVVFLPYAVLLPFPTDGWLSWFLAF  
VYSATCGCICVLFFTTIDVLYCVLTSHVCNNFSIISDQLQHLQVNNVNIIGNIVKEHQYILKL  
ADDLEDIFTAPNLFNVLVGSVEICALGFNLTTGNLAQLPGTILFLTSVLLQILVMSVFGENIIT  
ESRKIGESAFLCKWYEMDEKSKKMILTIMIRSRKPQILTAYKFSIISYGSFSKIISTSWSYFTIL  
QTVYKPELIVKNNIN\*-

>MsexOR-25

MELCKTIWRIITPTKALQSSGHLETFFESVYRVSYLMGLSTSDHDMFYLLYSTTVKFM  
TLLVCGELWYIFTETSSLDGIASSINVTLIQFITIYRYKNMMDHKDIYKKLATSMESPYFDTS  
NEKRKQLVFWAKRNEKYLKLLLFLGNCTLAAWYLYPLVDDIEYNLIIGFHTPFSEKTPLR  
YPVVYLVVIAFTYISHFVMVTDLIMQAHLIHLQCFTVLADCFENLLDDCQHGFEDVPR  
NMLVNNKQFAAKYIRRLGHLVEQHKKILKHTVNLNRTLSPMLGQLAASGTLICCIGYQA  
TTTMTESIVKCLMSLFYLGYNSELYIICLWCEEITQSMNIGDAIYCSGWECGVTKLPGVR  
STIMLVLARANKPLVLTAGGMYNLSLTAYTTLVKTSYSALTVLLRFRHE\*-

>MsexOR-26

ITYLYLFGLPNFWIEDFKLPKWFMRSDIFTKIINNVLYFFILMEMIAFFTQENLSERQKSDL

LVYGISHPILYSYRVFISYKEDNLRVLLDLVVTLKRVYNDVKVERQMIKKSLLYSSALVFS  
CILAMFFYTFDSILHVIRTGATFNVVITTPKVEDRSTLANAGRIVFYILWWFFMSRVSGAY  
TTVICLTCLSHQYTNLRSYFENLNNIFETNFDQAVKEQKYEDGFKVGIALLHDLTRCTRE  
CHSICQGVFSGQIILNILLVVLMSQMVNSERTLVAFATASSASAVLISTGYFMWNAGDVT  
VEASRLSSAMYLSGWHNCHGRSSITIRKLVVITMFNAQKPVILKGLGIVDLSYQSYLSIVK  
SSYSVLSLLY\*-

>MsexOR-27

MYTYVKVVVFWFNKKKVVNLEFLHCKEFKAKEMEHREIIHKSIRKARFVMTFYSTMCV  
GAVSVGIVMPLTENFNILPTNVEYPHFNVYNSSTYVAIYLHHIYYKPATCIIDAVMDTMLAA  
FVASAIGQIEILTNLRFNFDVVAERRRKAIAKGNKYIGLQNNNNYFMKCILKECIVHHNHI  
MRYVSMIENAFSLASALQFMLSVMVLCLIGIQFLSIENPSGHPMQMVWMAIYLTCLMVEV  
FILCWFGNELIWKSTGLRQAAPDAPWLATDPKNAKYIILFMERCKRPMKVTAGKIFTLSLD  
TYTALINWSYKAFVMSNMKK\*-

>MsexOR-28

MAWFGFIHTPHTGDLLAAMVVLSLGISVQIGTLKFFYTFVYINKETNIVKYYLECDSLIVP  
GGRFSGNLLRALRNVKKRAIVYWLVIINGITYVTKPMFMRGRHHMEDRYVIYGLEPMFE  
SPNYEFAYFLMTAGLCFICYPPANVTVFLIVVGYTEAQMLALSHELLHLDANEHYQK  
NINQHETTLINAQASKNKIINDYVRYRLKEIIMHAFNIHLVRQVEFVFRGAIAIGYVFLTL  
GLIAELGGLENTYLQIPFALIQVAVDCYTQKVTASLIFERAVYDCKWENFDKMNMKMKT  
VLLLQNSQKTMISAGGITMLNFSCLMSVIKSIYSAYTTLRRTMK\*-

>MsexOR-29

MKNYYILKTYCSKIFLLGSGDFWYENKVIIGDDKRILYRMYSICALFFIYGFMTVLEIMAAL  
MGEFPTDEKRDSVTFVAVSHAIVMFKIISVVFQKELVKTLNRKMTICEHYEEQALMSEKY  
RIMKINVIVYFLIVYGSAACFVFEGLRKLFDGSHFVTVVTYYPDYEDNSMFANSVRILATVI  
LFLMLNMIVCVDSFTMVYLIMYKYKFITLRHYFENLSVTIDKLNTPGNEEVVAKMLTDG  
LVEGVEMHSKLLRLSKDIDKAFGTVMALQLCQSSGSASVLLLQIALSDQLTFVASLKIVFF  
VMALFFLLGLFLCNAGEITYQAAQLSDAIFYSGWHVCRPRHSSRHVRKIVLLAIMQAQQP  
LVMKAFKMLELTYGTFILVVRATYSVFALFYAQDK\*-

>MsexOR-30

LENAERPLLGPVVKALQFWGLLLPKYRLKRYFYLTMHILVTLFTFTECVDVYFVKSDMNL  
LLNMLKITMLATVSVCKVNTFLYWQKRWTDIIAYVTRADLNQRNTKDEKKLALIKKFTLY  
CRKITYLYWFLMYTTVVIVVAQPIFKYAFSKNYRDNVRMGTEYTLQVVSSWVPFDKNTII  
GYIAASIYQTYAAKPNASADIIHTGGRSSMHLEGPIRPIVSRITIHWPSPFYNVVTGKTLALPN  
LIALQHI-

>MsexOR-31

MAQNTELFLGRPKILTFFGIWLPSKQYQDLVKIYMILVMITQYSFVLFVYIINVWGDIE  
VVSEASYLLFTQASVCYKTTAFLIKKRKLVLLLEHMEQEIFASQSKDHEKILLELSLRIKRL  
CTFFLTSAITCTLWAMIPLFDDAGHKTFPFRIWMPVTADESPGYELGYLYQMVSIYISAF  
FIAVDSVALSMIMFGCAQLDIKDKMQKVREVPICLVNDEKKEKLSNNDLFTFCVRHYQ  
NVISFVELVEETYHANIFFQLSGTVAIICNIGLRISIVDHSVQFFSMLNYMVTMLSQFLYC  
WCGNELTIRSEVLRDWMYQCPWYDQDTKFKRTLWITMERMKKPIIFKAGHYISLSRPTFV  
AILRCSYSYFAVLNRANT\*-

>MsexOR-32

MSCIMYLAVSEQLTMTLNSEDLYLNRAKFVMKFLGVVWVPPNDENIIRKLYRYFMISLQYL

FLIFQIYYIIQVWGDLEVVSQASYLLFTQACLCKFKVTVFHVNVDLLKELLQMNGETFRAQ  
SFDHEKILESQAARIKRLLLAFMISSQLTCGMWAVKPLFDDVGSRKFPFDMWMPVTPESP  
HYHIGYTFQLVTICMSAYMYFGVDSVALSSVIFGCAQIEIHKDKLMSIQPVDKNANDAINAF  
SDNYQQLVNCIKHHQAIVRFTDTVENAYHTFLLFQLVGSVGIICMSALRILVVDPRSMQFF  
SIVSYLSVMISQLFVSCWCGHELTATSEDLHTTLYMCAWKDQNTKFQKELCFAMLRMSRP  
LVLRARHYIALSRQTFIMILRMSYSYFAVLNQTVN\*-

>MsexOR-33

MAETLLDKSLSKINILFRCSGTNIAIGKAAPTNTKRNRCIYVINFILLNTDVLGAACWFISG  
LKIEIVAVFSICAADFVFNLCYITIQRLLQYDIEHVITGTRKSIYNDEMRRGGRIRNKLVEI  
IKWHQELITCVNLLNIYSISMLYNFISSVIICTGFNVTSIEVSNVYNSKWYLVPKTRK  
TILLILTRAQKPYKLTAYGFADVSLKAFMKVLSTSWSYFALLKTVYSTE\*-

>MsexOR-34

MKIFIDNANGTLWLSLNLRRWVGFLVPDNFEGRKKKLLPFYSFFWFMFIVGIYVIVQTGDL  
IQVWGDITLMTGTSFLLFTNMAFITKIINVMVRRDAVLAIIIDEGDEVLRSERRIEGKAIKVS  
SNQETSRLLYLYGLLTVVTVFGWAASAEGSLPLRAWYPYDTSKSPAYELTYLHQSVAVIL  
LAFLNVSLDVLVTSAAVCRCRFQLLALSRLTLCHDIPIDEKHLVSPEHKQIVHERLRLCVL  
QHQSILESAKIKTCFSGHILAQFTVSIIVICVTAYTLALETDRNPRIAMFSYLLGMMM  
QVFLYCYQGDYLSEESSDIADAAYECPWYACPIPLRRSLLVIMARSCRVAITAGGFSTLSLA  
CFVSIKASYSFFTTLQTSRRMSDHESTCCTNSTHHPKIFGSSSF\*-

>MsexOR-35

MVVIEKILSFLEDPYPSVGPHIRLLSLTGLWHPDLKSPKSRFKIIIIFLTVAFFLSQYVKCIK  
FNTDDLKILQYAPSHMGIKTCFQKDYKIWEELIDFISSVELKQISRKDENLDKVMKAYI  
RRRRVSYFFWALAFFSNFSIFTEPYQKNFNVTSTYLYIFDGYTPFSREPNGYYFSMCI  
QTMLGHIVSAYVIAWDTLVVSIIFAGQLKITRLYCTRMITANNEESHARNIAECHRFTSL  
VKYQKTFNCLISSVMFVYLVVISVNLGVCIKQIAEIEDDLPTLVSSCVFLMACLIQLLLFYW  
HSNEVTIESDLVSYSTFQSNWAQSNKNIQKEVALLALTRKKLFRAGPFVMSLSTFVSIL  
RASYSFYTLLKGTN\*-

>MsexOR-36

MAETLLDKSLSKINILFRCSGTNIAIGKAAPTHTKRNRCIYSFNFIWQNTDVLGAIYWFISG  
LKSGKSFTLTIAPCIILSFLSVMKSIISIIYEKKVYQLIKNLRMMEAHERNRENTTERGKIT  
EKGVNFLNLVINVLVFNMLVLVCFALNPLILMILNYMKTNEIDFILPFIAYPFDYPIKIV  
WPMVYLRQIWTEIVVLNTIAPDFVFCIFCSHITIQFRLQYDIEHVITGTRKSIYNDEMRRG  
GRIRNKLIEIHKWHQELITCVNLLNIYSVSALYNFISSVIIICLSGFNVTENKDIVLVISFIAFL  
FMGLLQIFFFCFFGDMLIHASIEVSDAVYNSKWYLVPPKMRKDFTSNSNSCPTSL\*-

>MsexOR-37

MKIFIHNANGTLWLSLNLMMWVGFLVPYNFECQKNNLLPLYSFFWFMFIVGIYGSFRTRN  
LIQVWGDITLMTGTSFLLVTNMAFITKIINEMVPRDAGLSIFYEGDEVLRQRRIEGKAIK  
SSNRETSRLLYLYGLLTVVTVFGWAASAEGSLPLRAWYPYDTSKSPAYELTYLHQSVAVI  
LLAFLNVSLDVLVTSAAVCRCRFQLLALSRLTLCHDIPIDEKHLVSPEHKQIVHERLRLCV  
LQHQSILESAKIKTCFSGHILAQFTVSIIVICVTAYTLAETHDNPIRIAMFSYLLGMMM  
QVFLYCYQGDYLSEESSDIADAAYECPWYACPIPLRRSLLVIMARSRRVAITAGGFSTLSLA  
CFVSIKASYSFFTTLQQVEE\*-

>MsexOR-38

LSLPLQSSHVTMDLNFDMYILTVMFAMRINRSHPSIAKDTKWFLQLLPMYGIFSIMFALLIN



CIIHYDLKAKDFSSTCRNGCLCVLYFISTLSYYVMLVHQTTLKIINTMNEDYAQALKFKA  
DEQKVVLDYAKKGLYVCRQWLAMSIMGVGLFFVKNVLLYAYNYVDDMKLVPLHDMT  
YPRIIIEKRDDIIYASLYALTYYGVFAAIMYMSFVPLGPVFMHCCGQLELIVMRLENLF  
IKYTHEEANEKLDIIRHLQNIYGFVKNIEKCFYELTLKATTITLPIAVYEIIESCHRREL  
RMEFLVFIFGAMIISNSPCYYSHLLMENGEQVRLAVYCSGWEVVPPIRRLALLSW\*-

>MsexOR-39

HVVSVEFGQLQGLHRLVYARRVRRQPVLHFIIRIPIYHHPPGGTGYPASHPYLHSAESDE  
LVIELVGNKNPSWQTHCTSVLVQCCKHYIKLRFSNRLNYICRPFYLTLLVSTMLVCMCS  
VKIATSEKLSPTTKYYVHEFCFIQVVHMFCLLGQHVENECEKLEAVLEKWHIFNKPHQ  
TNVRIFHTAVSQRMPIYIFGTIPLSLPTFTWFMKTGSSFFTLVMSVLEEENA\*-

>MsexOR-40

MTYKNRQHQELEMELSHLPGDYKPLIACFDLLARCNIGFFHGNSSYFKKYWRYSYIISC  
VVAYYSSLTVYALKIFLGQMEFELAYVVPVVFVCTQAILKAIIVIIHKGEIRALVLQGET  
WRTDNLTRQLNKNLLKLNFCYGVFRIVYSYLGTEFLLISLCSHLSTEFCLLREDLLN  
VKPVGNNRRFRILQDSSNIELHDIVVKHQKLIKSEQLNEIFNKMIFVNLSSVTITVCFFAFAT  
KVARGPVDMANFMAMALILPIFNLCYYAEMLINASAGNKQESAYHSLWYVANKQYQ  
MSIWFIIRRSQKPCCLTSLKFSVALHTFTAVLSTTWSYFSLASSLFENEN\*-

>MsexOR-41

DLIIEELVIFYFTELA AISKVLTFVFFRDKLAKILDALEDPMFQAANGREQKIIDGAKRFNKR  
YWKIVATVSLTSHATHILSPIVEHLFLSVPLQLPTCRYSFLENTIQQFIYPLYLYQTLGMHSH  
LWFNANIDSSFFGLMILIAQLQILDRLRLRTVTDVKKNDDIGQANTSEARANYSLTQLNKCI  
VHFDEVGKFCGLVEDTFSMTLFMQFSMSSCILCVLFRFTLPAPFEYYIFLGTVMCMISFI  
FVPCWFGTRVMELSVLLCSSVYECDWTAMPKKFKSNLQLFVERAKRPLTITGGKMFMLS  
LTTFTSIMNSSYSFFTLRLNVQTHD\*-

>MsexOR-42

MASLWRKYFTKEIQVLKRVYEKSDYEDTYETPRKYLKWSGIRMKHNISKSLSICWLVIY  
WFCFVNIVFASVAEIIAMCMTASAGTFDDAIAIFQMMPCNGFCGLSLVKSFKMVKHRPVFE  
NLITEIGNMWPQRLVDEEEHKKIASSALREIKIFVKGYHWCNNYLMLSFLYPPFWELIKRLSG  
EKWEPKLHFIYWLPFDPLQPVYYECMLALQTWQAMTVIWTNMSGDFMFLFLSHITTQF  
NLLSVRIRKLIYVPVDQQLIESYPLGQYSEEYLRKNKEPVDSYTPQQWEEKHFKEITEIVLQ  
HQALIRLSRDIENMYSLTLLVNVNSPLVICFCGFCVVVEKWNETAYKSFLVTALSQTWF  
VCWYGQKLLDSSEGVAEAVYNSGWYRASKKIRRSMLMIMLHGSQKGVGVTTYGFSIISLAS  
YSTIIKTSWSYFTLLLNFNSNK\*-

>MsexOR-43

MLERLSKYLENPNHPLLGP TLCGLKCWGMWQPLGVNRIIYNAIHFFAILFVISQYVELWFI  
RSNMELAIRNLSVTMLSTVCVIKAGTFVFWQKSWNDVIDYVSGLENIQLSKRDITNSVIS  
EYTKYSRSITYSYWVLVTATVFTVILAPLVGFLSSDKDLMLNGTLAYPEIMSSRPFNRSR  
GFGYWVAEIEHSLICFYGGGVVANYDSNAIVLMSFFAGQLKLLSINCARLFNDNEVLKYS  
DTMKRIKDCHHHHVEIVKFSMVLNSLLSPVMFLYVIICSLMICASAIQLTAEGTSMQRIWI  
SEYLMALIAQLFIYCWSNEVLHMSSKVDEGVYPSHWSAQNVRRRSVAPRRRATAQAH  
RLHSRTLYQAHYIYFCSYSEGIVQLLYAAKQERRLRT\*-

>MsexOR-44

FCTIAKTRAKPVNYKINKKKYNFTSITRTRIHFRILISIQPVDKNANDAINAFSDNYQQLVNC  
IKHHQAIVRFTDTVENAYHTFLFQLVGSVGIICMSALRILVVDPRSMQFFSIVSYLSVMISQ

LFVSCWCGHELTATSEDLHTTLYMCAWKDQNTKFQKELCFAMLRMSRPLVLRAGHYIAL  
SRQTFIMILRMSYSYFAVLNQTVN\*-

>MsexOR-45

MDVCIMYLAVSEQLTMTLNSDLYLNRAKFVMKFLGVWVPPNDENIIRKLYRYFMISLQY  
LFLIFQIYIIQVWGDLEAVSQASYLLFTQACLCKVTVFHVNVDLLKELLQMNGETFRA  
QSFDEKILESQAARIKRLLLAFMISSQLTCGMWALKPLFDDVGSRKFPFDMWMPVTPES  
SPHYHIGYTFQLVTICMSAYMYFGVDSVALSSVIFGCAQIEIHKDKLMSIQPVDKNANDAIN  
AFSDNYQQLVNCIKHHQAIVRFTDTVENAYHTFLLFQLVGSVGIICTSALRILVSEDLHTTL  
YMCAWKDQNTKFQKELCFAMLRMSRPLVLRAGHYIALSRQTFIMILRMSYSYFAVLNQT  
VN\*-

>MsexOR-46

MVGVSPLPKYNTPFYVITYILVGI AFNYTSHFCMVTDLIMQSHLIPLICQYSVLADCFTNL  
VSDCEVGFEGIAREHLVNNKKFVKLYLRKLGNLVEQHKFILNHSIELRTILSVPMLGQLAA  
SGILICFVGYQATTTISVNITKCLMSLFYLGYNMFTLYIICRWCEEITIQSQNIGEAICYSGWE  
QGMSKIRGVRTTILLVMLRSSKPLIFSAGGMYKLSLTSYTTLVKTSYSALTFLLRIRRE\*-

>MsexOR-47

PSPSLRMVRQRGLHSRLLRRSHGLQLPLVLV FCHHRDPERVAGCVLCSHLPCRCGTGLKP  
QDSSLDRIICMGILTVQEITSIMVVASYDMTLLFLFSHTTAMFQILYEDVTNFRELAENYYD  
SSEMKS AVFERLKNLLIRHSSILRTVQKMQDVYSVVVGIGFGLNAISMCLFFVLPIDVCLNF  
APLIFHSLFVFFLYCYQGQRLTTASEKFEIAVYSCGWEHLGVRDQKTILLMLIQAQKPVIM  
MAAGVIPIRIRTFAYTLQNIYKFVTLFKI\*-

>MsexOR-48

SLDHSQSSNKEVSVICSFQILTVLLDFPHFHYENFSIFNHTHSQSLDFRDWLYEVS WYDQD  
KRFTSTLSVLLQCTKKPLEFRAGHYVLLARATFVSVLRCSYSYFAVLQQANEG\*-

>MS|comp957466\_c0

WIMGLHQIDCFKIHMKFWRFLAIWPGDDDSRSYNRYSKIFISTFV FVYVYVLF TINFYFLPRR  
LDIFIDMMFYFTDCSVVSKVLTFLMRHKIVAILDVLESEIFQPDDDDGRAIIA-

>MS|comp163536\_c0

RRVAMENQNPPERVVPVQYGRGSRAFRQFKNPPQPHMCIQDTIKGTTEKLYINVLGWQKI  
ANPKQYSDPIPLYGGMQVPQNYGPNAGRPPMIVFAVMVNPDILKANGKNATSPDREALV  
SLLCDFVEAMNPGALARNPVIMKDRDLAGELKD VWLAVQNKREKGMNQDVMYKV  
YDIDGIGEDNMNEDDNNQMKQGGSPNRGSGDKKPKVKSSKQILLNAGQKSEFDSGMNNC  
QINQSHLNRDNKTGNTPTTYCTPVYGGQIVSTREHNQINDIQKFASNEIKPSSSFRKDW  
NPMHGKTTEGWDEFKRNISTIKNDEKKRCIKDKSKISNGKSHYDFPYFDNKT VNETDV  
PEEEDSMNKEQNSNEENSKIIDPMQKLV LHSTDKNICDNNTSALSSISS-

>MS|comp165911\_c0

MSRKCNDPNSFCYVCGILTFKKQRQNFTNLVLECYHQCFGFSVAHQDKFWAPHVCCITC  
VKNLTDWKKGARAMPFAVPMIWTEPRDHVSDCYFCLTDIKGINYKKKKQLSTLLPPLHIK  
LGLIKNFVKGMDRSGSGVLYLKEKFPKISDAKIKEGIFVGPQIRELIKDSTFEEKLSGLEKC  
AWNAFKNVVANLLGNHKGDSYRELSELLLSYQALGCNMSLKIHFLD SHLDFPDNLGA  
VSDEHGERFHQDISSMEKRYQGKWSPNMLADYCWTIKRDQPEAKHSRKS-

>MS|comp11107\_c0

YAYLIMMRHLLSVISSWPLKILDPLDTGAIQRRKIWVSIQRFFHMAVCLSTVVGGMVYVM  
LHKKSMTFFELGHLYISLLMTFVIF-

>MS|comp111125\_c0  
EEEQLFIDITVKKIEFLFRCAGFNIKCSPKTHMDTIKSRTIFIVNFIWMNIDFVGCVVWFITGI  
VNSKSFVELTFIAPCVMP-

>MS|comp143892\_c0  
VGIRLPLFYYPMPERYPLAYTIVVISFFYISHFVMVTDLKMQTHLMHLLCQFTVLGHSTT-

>MS|comp1530192\_c0  
MSQVVSTCDVLVVVATAGAGVYGAPRRMRKMLKFMENIASVDTSIGGQYSLVTERKLCG  
IILGILIFFSVLIADDFTFYALQAKKLDREWEVVTNYLGFYLLWFVVLILELQFAFTALSVRA  
RFSAVNDALALTA-

>MS|comp1754988\_c0  
KAKKFNKIYWKAVAFVSITSNCTHTMAPLMLHFGKGMELIFPVCSYAFFSESFRHMFYPI  
YFYQSVGITFHMLYNL-

>MS|comp1789939\_c0  
NSTPKYIIFKLQGIPGWSGLAPAFGSGRDPGVPGSSPTLGS LHGACFSLLLCLCLSL-

>MS|comp1802501\_c0  
MVVLSLGISSEIGILKLLYMFLYIDNIRGLTDAFLDFDALTPGSRQASNLLRYMRDVKKRA  
IFYWMVLMVNGTIYVFMP LAIP-

>MS|comp2429514\_c0  
MKSFKALKETLVETKRLVKEDSLESVMFIVNVVFNFGFSYKKDGKVTSWFWILHLSLLF  
YVYA-

>MS|comp43532\_c0  
KYKGFNETFKLCAFSLAFAFLYPNRTTAIKRCVIITAIVTFCGGQLFWFITYTFKCLYTLDIY  
NFARN-

>MS|comp790023\_c0  
EETKTWITFLSSISKLLLSQTILGVLAFAFGPFSLISSNYLKTGEIKLVLPFIVWYPFDELDR  
W-

>MS|comp102652\_c0  
CAQLDIVKEKILSITSINGQRGTREVD EALAKNYNKLVNCKIKHHQAIIKFTELVENAYHPYL  
LFQLVGSVGIICMSALMILVVDW-

>MS|comp102652\_c1  
VSSQITCGMWALKPLFDDADRKFPFDMWMLNPEKTVQYYIGYTFQLVTICISAYMYFGV  
DSVAFSSVIFGCAQLD-

>MS|comp1032844\_c0  
KFLGVVWVPGENG SFLHTGYRAFMMTLQYLFLIFQIYIIQVWGDLD AVSQASYLLFTQACL  
CLKVTVFQVNMGM LKDLP-

>MS|comp104640\_c0  
VGKLEAIYRV TIGIGFLDAISLCLFFVLPLEVCLNFAPLIYHSLFIFFLYCFQGQRLTASEK  
FEIAVYCCGWENLRVKEQRQVLLMLKQAQKPVIVYAARVIPIRIHTFASTMQSIYKF-

>MS|comp107793\_c0  
QTRAQT PCKLTASNFAEVNLKAFMKVPKPNFY-

>MS|comp110478\_c0  
LTLVV TALTILCSTGFFMWNAGDITVEAEVLPTAMFSSGWENCWHESSVRVRKLV IAMIQLQ  
AQEPVALTGLGIIVLSYQSYVSIVKSSR-

>MS|comp110712\_c0

MLRRIAEQLSKIFGVVIFIHMVSAASLVICFFGFLAVVYSGLADTVANLMTVFNAMTTIFFLT  
LSG-

>MS|comp116110\_c0

LSFQSENLEWLYQCPWYEQDTKFNRALFIAMERMKKPIIFKAGHYISLSRPTFVSILRMS  
YSYFAVLNQTR-

>MS|comp116394\_c0

LRNVKKRAMLYWVVVAGNGVLYVMKPVAMRGRNLPENYFIIYGLEPMFDTPNYQIAYF  
MMIAGVFFICYVPATVTAFLIVITGYAEAQMLALTEE-

>MS|comp1239304\_c0

FWQKYWREVLDYVTEADKFERQSGDPIKTMIVDTYTKYCRRLSYFYWAIVFTTFWTTTG  
TPLMTYLSSFTFRENMRN-

>MS|comp124817\_c0

KWERIPTSQRRPLLMMMRAQRPLRLTAAGFTHMDNACFLAIMKAAYSYYAVLSQRQE-

>MS|comp133273\_c0

KVRQIVSECLASDAAVVAGSRFSSNLLSALRHVKERAMVFWMVIIIFNGVVYIVKPLLTGR  
HFTEDKFIKFGLEPMQENPNYQIANMLFAAGVFFTVYVPANITAFIVVTGYVEAQMLSL  
EELLHLWEDAEEHYKTEQAISIFDSNKTDLKDAMNEYVAKHLKDIIRSHGRNINL-

>MS|comp1348560\_c0

KFDMITVEYLAVALDTFVYCYGHQIILQADRVSTAAAYQSMWHTMGVLP RRVL-

>MS|comp1355432\_c0

RISEAVMECKWECIPTSQRRPLLMMIMRAQRPLKLTAAAGFKDIDDVCFLSIMKAAYSYYAV  
LTQKQEK-

>MS|comp139413\_c1

GGNRFVHLVQRYEAVTWYTKAVSEVFNGSMSFEFFSCSAIVCVITYRMSFVSFLFLLVSY-

>MS|comp142810\_c0

LWRFFAMLTREIEHEIRKFGLEYCDLPTMLENVSILLRVLTVNIDSNYHKGIKIYSYILTAV  
TAVCFYVFLFSMSWFVYRCRITGELVGAMVVLISLGSSEIGPFKLFYMCFHMDKTQKI-

>MS|comp147212\_c0

LKALSVETSNRFYSSGWEQIDDQVRMILFMVARAQAPIAITAFNMLAFDMELFTSILQS  
SYSMFLLRS-

>MS|comp150812\_c0

SSVIICLDGFNVMAINNIATITCLSFLFTSLLQIFFLCFFGDLLMTSSIEVSDAVYNCRWYLA  
DTRLGKDLLMQTR-

>MS|comp150812\_c1

VISVLNVFYFVLAVMVALSPLSLMALNYYTTNELELLLPLLAVYPFDHYNIRYWPWVYLR  
QVWSTVIVTIDICTADYIFYFCTYIRMQFRLLKQNIETFIPDDVIDGRLRNNEAVRTEFVVL  
VKWHQDLISSTKMLEAIYTRSTLLNF-

>MS|comp150890\_c0

CYLVDNKIFQAFEVGDAGWTCGWHEPGLMIRDDIIIIIRAQQPVTIKFTGLPHVQLETFS  
SCMSSSYSYFNMLRQYSK-

>MS|comp1523813\_c0

DKIQMTRLNKSLEHYEVILTFCDTVQDILSVTLFFQYGVSTLIICVVMTGLALPSSIEFRAFL  
AMFLFTMLRIFVPGFLGTQLSHESEEL-

>MS|comp152388\_c0

MADEELEFKPFSPTYRKITFALSVGMIYPNPKTEKWRLASIPILVTSIMPLACMILYDMYKC  
WMVKDIVNIIRHSTVVGPFLGGFFKMILMYHKRIQAKEILDEIDRDHELFDNDISDIYKDIAR  
ASIKNSQIYSERGWVITVSTCVMTFPVIAIVLNINFTFKSEPEKYMIDHLVIPMSESEMRFE  
SPYFE-

>MS|comp152487\_c0

DLKNRTYEQAINCLYPWNFETSLSGYIVANLSGWYGTFLCGSSVSMFDLFLCLMIYNLWG  
HFKILIYNLENFPRPAAEVVDAAGEERSGMRIGSEMYSQSELDEVAIQLKDAIQYHKLIVD  
FTNNMSDAFGMALFLYYSFHQVTGCLLLLECSTMTAAALTRYGPLTIIMFGELILLSIIFETI  
GTMSEKLDKAVYDVPWEYMDTKNRRTVLIFLIKVQEPVHVKAGGLLDVGVTTMASILKT  
SFSYFA-

>MS|comp157094\_c0

MKLVSDASELEGVEKTEDIPYMQILRKSMWILDAWPKTPNESRIHRYYMVFIKICCLIPGII  
YLRNNTGKLSSFEMGHYITVFMNTIAFSRALMVLSKKYNDILFYFLNEMHLFNRYRNKSD  
YSYQTHILVHKISHFFTMYLLMMCLGILLFNLTMPYNNYTDGMYREVKPPNATFDHSVF  
YSLPFDYTTNLRGYLALFTFNWYMSCTCSSYFCVVDLTISLLVFHLWGHMRILQYNLQNF  
PKPASLLVESKDGEIKDHKYNEQEIQIDHNRLENLHYHSVIIDFQRRMSDSFGAVLLIYFL  
FHQVSECLLMLECSQMDKKALLRYGPLTVVIFQQLIQLSIIFELLGSSNDKLIDAAYCVPWE  
YMETKDSKMLVMLIQSQVSMNLKAMSMLTVGVQTMIAILKTSFSYFVMLQTVAEEEE-

>MS|comp164245\_c0

MMTKVKAQGLVSDLMPNIKLMQAAGHFLFNHSENAAGMSNLLRKYASTHAILIIVHFAC  
MGINMAQYSDEVNELTANTITVLFTHHTIILKLGFFALNSKSFYRTLAVWNQNSHPLFTESD  
ARYHQIALTKMRRLLYFICGMTCLSVVTWITLTFGGESVRMITSKETNETLTEVVPRLPLKA  
WYPFNAMSGTMYIVAFQVYWLLFSMAIANLMDVMFCSWLIFACEQLQHLKAIMKPL  
MELSASLDTYRPNTAELFRASSTEKSEKIPDAVDMDIRGIYSTQQDFGMTLRGAGGRLQNF  
GQQNANPNGLTPKQEMLARSIAIKYWVERHKHVRLVASIGDITYGTALLFHMLVSTITLTL  
LAYQATKINGINVYAFSTIGYLSYTLGQVFHFCIFGNRLIESSVMEAAAYSCQWYDGSSEA  
KTFVQIVCQQCQKAMSISGAKFFTVSLDLFASVLGAVVTYFMVLVQLK-

>MS|comp1998815\_c0

FVFLTYTVVMTLQVMVPCWFGSRLIEKSSQITFSVYDCDWTPRCRRFKSNLRLLLVERAN  
RPITIRGGKMFLLSLATFTAV-

>MS|comp2023556\_c0

IVMVASFTAFLVFGMLQIFLYCYYGDTIMRSSMQISSAIYNSNWYNVGVVAERKSFLIVLIRA  
QKPCELTANG-

>MS|comp33920\_c0

KKDFEYICSEGEKYRAQYFEEQLLTKICIVMCTFNAGIGIAMNIFAYLSLFYFMATHDAD  
TEESRPLLPFWIPNVDLT-

>MS|comp35555\_c0

SFCIATTHLRLKLLTLKVEKAFKNSRSRHELRMKMNEAIRDHQDAYDFYVQLQNVYGP  
WLFVAVLLTSFMISFNLYQIYLLQRIDPKYTSFGVVG-

>MS|comp360965\_c0

AIVYKLLLIFEQIICGPVVCLTAYCIAEVFFFTIMNLLVFCCHFFSYF-  
YFQKIDKGEFQAILLLLCIATIVMYFTPSLLCTYLSIKVRILN-

>MS|comp3974\_c0

LMSYLCVSFCMLDLFSLMVFNVWGHFKILLHDLATFPLPAKNMSSNNYG-

>MS|comp447468\_c0  
LEISDAVYNCKWYFATPRVSKQLLLVQTRAQEPCKLTAAGFADVNLNAFMRVLSSAWSYF  
ALLQTVYSGK-  
>MS|comp50905\_c0  
EKWNEVAYKSFLVTALTQTWLLCWYQGKLDSSKRLADALYDCGWYNGSKRAKSAILIM  
LHRAQKGIYVTTTHGFSIISLASYSTIIKTAWSYFTLLLNFVKD-  
>MS|comp55130\_c0  
LTFILLHMNELVLEMTGIQDHRWRVYCTVVLSQCVDHYVKIKSFSNRLNVICRPFYLALIL  
VAIMLVCMCSVKIAISNK-  
>MS|comp611033\_c0  
KSKESVMKINKCILHFDEVGKFCDLVEDVFSATLFVQFGMASCIICVCLMRFTMPAPMSYF  
VFLGTYMCMILQILVPCYYGTRITDKSSLLAFSIYNCDWTPGSRQFKS-  
>MS|comp633077\_c0  
FIPENSNTTLTYEMYTENEQKNVGKLGELINYHRDIISFTDKISEVFGPMLFAYYGFHQAS  
GCLLLECSQMTAAALIRYLPL-  
>MS|comp638207\_c0  
AYVVGWDTLVVSIMIFFAGQLKITCYCRMMIDA AKLDKSHRNIADCHRFYTTLVEYTHL  
FNSLISPVMFVYLVVISVNLGVNIIQIVEIQDDIPTLVSSVLFVVACLIQLLLFYWFANEVTIE  
STFVSY-  
>MS|comp79584\_c0  
QFKSNMRIFVERANKPLSITGGKMFCLSLPAFTSIMNSAYSFFTLQMKD-  
>MS|comp80641\_c0  
DKRVRQIVLFMLMRARIPMGITTVFYVINLDTFAEMCRQSYTLFNLMAAWE-  
>MS|comp813906\_c0  
GSISDRLKFAVYGLPWESMDKKNRRTVAFFLMNVQEPVHV KALGLADVGVTSMTAILKT  
SLSYFTFLKSM-  
>MS|comp892037\_c0  
MELWHQIRKFGLEYCDLPTMLWNVSVFLKLLTLNIYGKNKSGIP-  
>MS|comp90072\_c0  
LSLMVFHLWGHFKILINLLNDFPRSSGSNFTTEDGFLIRAEKYSKEELQQVSERLAECIY  
HREIVNFTNTMSDVFQVPLFVYYVFHQVSGCLLLECSQMTTQALIRYVPLTLTL-  
>MS|comp904167\_c0  
LMQVGMDCFTGQRVMDANVKFERAVYDSKWENYSLSNMKIVLTMQLSAQKTMKLSAG  
GMIMLSFSCLMQVIRSIYS-  
>MS|comp926109\_c0  
MRLKIIRDFLKESFDFDRPDIDLYNFHPQLRIFLAVKGVFFSNRNSRLRYIWPACIQLSVV  
A-  
>MS|comp94306\_c0  
FAQLTVSLIICVTAQFQLSIAHPDNMVRLLSMGTYLLNMCQVFIYCYQGNQLSEESSEIAG  
AAYESPWYKCSLRVRRSLLIVMVRTRRALRLTAGGFTTSLASFMAIIKASYSLFTLLQQV  
DE-  
>MS|comp94444\_c0  
EITNQSAAKVGAIYCSGWECGLSKLPGVVRSTILFVIARANRPLVLTAGGMYDLSLTSYTTLV  
KTSYSALTVLLRFRHD-

>MS|comp948927\_c0

RSRQFKSNMRLFVERTNKPLSITGGKMFCLSLPAFTSIMNSAYSFFTLQQMND-

>MsepOR

MKLVSDASELEGVEKTEDIPYMQILRKSMWILDAPKPNPESRIHRYYMVFIKICCLIPGII  
YLRNNTGKLSSEFEMGHTYITVFMNTIAFSRALMVLSKKYNDILFYFLNEMHLFNRYRNKSD  
YSYQTHLVHKISHFFTMYLMMCLGILLFNLTMPYNNYTDGMYREVKPPNATFDHSVF  
YSLPFDYTTNLRGYLALFTFNWYMSCTCSSYFCVVDLTISLLVFHLWGHMRILQYNLQNF  
PKPASLLVESKDGEIKDHKYNEQEIQIDHNRLENLHYHSVIIDFQRRMSDSFGAVLLIYFL  
FHQVIECLLMLECSQMDKKALLRYGSLTVVIFQQLIQLSIIFELLGSSNDKLIDAVYCVPWE  
YMETKDSKMVLVMLIQSQVSMNLKAMSMLTVGVQTMIAILKTSFSYFVMLQTVAEEEE-

>MsepOR2ORco

MMTKVKAQGLVSDLMPNIKLMQAAGHFLFNHYHSENAGMSNLLRKIYASTHAILIIVHFAC  
MGINMAQYSDEVNELTANTITVLFTHHTIILGFFALNSKSFYRTLAVWNQSNHPLFTESD  
ARYHQIALTKMRRLLYFICGMTCLSVVTWITLTFGGESVRMITSKETNETLTEVVPRLPLKA  
WYPFNAMSGTMYIVAFQVYWLLFSMAIANLMDVMFCSWLIFACEQLQHLKAIMKPL  
MELSASLDTYRPNTAELFRASSTEKSEKIPDAVDMDIRGIYSTQQDFGMTLRGAGGRLQNF  
GQQNANPNGLTPKQEMLARSIAIKYWVERHKHVRLVASIGDITYGTALLFHMLVSTITLTL  
LAYQATKINGINVYAFSTIGYLSYTLGQVFHFCIFGNRLIESSSVMEAAAYSCQWYDGSEEA  
KTFVQIVCQQCQKAMSISGAKFFTSLDLFASVLGAVVTYFMVLVQLK-

>MsepOR1

MAYTPRSLRDFLDYEPPEGVSSPADYAYLIMMRHLLSVISSWPLKILDPLDTGAIQRKRW  
VSIQRFFHMAVCLSTVVGVMYVMLHKKSMTEFFELGHLYISLLMTFVIFSRISTLCFSDEY  
VVVARNFLEKFFHLFFYKDRSEYSMQTHKQVHRIAHLFTIYLINQMLAGLFLFNVTMPYNN  
YSAGNYASGGLKGNATYEHALYFSYPFNASGDLKWYILANIFHWIISYLCATWFCMHDCF  
LSLMVFHIWGHFKILLYNLENFPRPANRISFIPDNSNTTLTYEMYTQNEQKNVGVKLGELIN  
YHRDIISFTDKMSEVFGPMLFAYYGFHQASGCLLLECSQMTAAALTRYLPLTILFQQLIQ  
LSIIFELIGSISDRLKFAVYGLPWESMDKKNRRTVAFFLMNVQEPVHVKALGLADVGVTSM  
TAILKTSFSYFTFLKSM-

>Pxy|OR1

MRVFFLTDGSDLEGVEKLEDIKHIKVVKWTLTSLNSWPHPPHRRRRAYVEQFFLNQSFCLC  
IPFIVYLLRNTGKKDFFRMGHVWITFFMNIVASTRLLLPLTKNYQTLTKSFIEELHLFYHRH  
TSEYSMKIHLEIHKLSHFFTMYLTMGMVGGIVLNFATPLANNIFSGAFKKDKPPDLEFEHA  
VYYGLPFDSETKYSYIPVFLYNWFISYFCSSFCIYDLILSLLIFHLWGHKLILNYNMRTFP  
RPGCVAPHIKDTSRLRYDDEEMVIVGRMLREQIDYHRFISDFSDHMSATFGPMLAIYYSFH  
QVSGCLLLECSQLDADALIRYGPLTVILFQQLIQLSIVFELIGSSSEKLDKDSVYSMPWECL  
DDKNRKILLIFLKKVQTPHILKAMGIADIGVQTMAGIITSLSYFAFLRSK-

>Pxy|OR2(ORco)

MMNKVKAQGLVSDLMPNIKLMQMAAGHFLFNHYHEENGGMSMLLRKIYASVHAFLVVIHY  
LCMLLNMAQYSDDVNELTANTITVFFFAHTVIKLLYFAINSKSFYRTLAVWNQSNHPLFT  
ESDARYHQALTKMRRLMYFICAVTVLSVISWVTLTFFGGESVRFIPDKETNETLTPAPRLP  
LKAWYPPFDAMSGMYIVAFAYQVYWLLFAMAIAIANLMDVMFCSWLLFACEQLQHLKAIM  
KPLMELSASLDTYRPNTAELFRANSADKEKVPDPVDMDIRGIYSTQHDFGMTLRGAGGR  
LQNFQQVNNPNGLTQKQEMLARSIAIKYWVERHKHVRLVASIGDITYGTALLFHMLV  
STITLLAYQATKIDGLNVYAFSTIGYLSYTLGQVFHFCIFGNRLIESSSVMEAAAYSCQWY

DGSEEAKTFVQIVCQQCQKAMSISGAKFFTVSLDLFASVLGAVVTFYFMVLVQLK-

>PxyIOR3

MPAGAVYLDYVRILRRFLWFNGCWPGQLFGEEVPLFIRYHKYHVVLGQFTVNLMAQINFL  
WKFHKDISFLMMGHVYITTFLLTSVSLVRSLLPHFEEYRNIVNTFLTEFHLYYHKQDKYEA  
EISAYWDKFSYWFSLCQMALMLLGMTSFNVLPIYKSIQAGAFTTRDIDRDNVEFAVYFAIP  
GIDCYDYFYILTALNVYFSYITACVICVLDLLLSLIVFQIIGHIQILNYNILNIPMPEGLKYNKE  
ENSVIGKHLISIIDQHRYIVRFAATISSFFGPMLAMNYMFHLVSGCILLECARPDPETLARF  
GPLTIIVFGQLIQLSIIFEFVGYISEKLIDAVYCMWPWASMDVSNQKTVKFFLSRIQTPIQLTAM  
GIVPVGVTMLKILKTTMSYFALLKSIRAE-

>PxyIOR4

MKPGALS LDYVRTVRRFLWFSGAWPGEVFGEAVPRFIRCHKYLILVQYVVLGLIGQVNFLW  
KFNKEISFLMMGHVYITTFLLTSVTLVRSLLPFFQEYKNITEEFLTEFHLYYHKAKGKYEA EI  
CAFDWDLSSWFALYQMALMVLGMTLFNALPVYKSVQAGAFTTTDLHNVTVEFAVYFDI  
PGFHCYDHFCILTALNFYFSYITSCSVCVLDLLLSLIVFQIIGHIQILNYKIENIRTPPEGLKYNE  
DENMQVGKTLIAIIDHHRDIVRFAASISSFFGPLLAINYMFHLVSGCILLECARPDPETLAR  
FGPLTVIVFGELIQLSVIFEIVGYKSEKLIDAAVCMWPWESMDVSNQKTVKFFLSRIQTPIQLT  
AMGIVPVGVTMLKILKTTLSYFALLKSISE-

>PxyIOR5

MSRKAGALDLQYIQILRRFLWFNGAWPGDVLGEPVPLLIRYHKYQIQVQSILVLIAQVNYL  
WKFNDEMSFLMMGHVYITTFLLTAVTLVRCSLPFFQEYHNISKTFLEFHLCYHKHKGKYE  
AEICAFWDWLSYWFALYQMALMVLGMTLFNALPVYKSIQAGAFRTMNLQNKTFEFAVY  
YTLVPYHCADHFYISTTMNVYFSYVTSCSVCVLDLLLSLIVFQIIGHIQILLYNIENISVAKG  
LKYNKEENMAVGKKLIEVIDHHRDIVRFAASISSFFGPMLAINYMFHLVSGCILLECARPD  
PETLARFGPLTVIVFGELIQISVIFEIVGYISEKLIDAAVCMWPWESMDVSNQKTVKFFLSRIQ  
TPIQLTAMGIVPVGVTMLGILKTTLSYFALLKSISE-

>PxyIOR6

MIQTGERSKALEVKYIKALSKFLWSIGAWPGEEFGDSVALPIRFQRLTLPYQCAGILAAQIY  
YLVNHR TNIRFFDVGHVINCFLTLATGTRTALPSFKGYTLIVKKFINDFHLIHFKDKGEYDE  
KVYKITDFVSYYFTIMQMTLMVCGMTLFNMSPLYNDYRMGAFSRHRPPNITMDFAVFYE  
FPGATQDEHFYAATFLNLWLSWNCSSVCSIDL LLSLMV FQIIGHIRILMYDFENLERPKSS  
ESVKTEGEESLPVTVLVELFDRQENMRVHRKLIDM VIRHRLIVEFADDISFFGPLLALTYSF  
HLVSLCILLECSQNDPQALARFLPLTAIIFGELVQISVVFEVVG YMG EKLIDSVYLSPWEC  
MNVSNQKSMKFILSRIQLPLQVTAMGMVPVGVETMTAIIKTMSFFAILQSIND-

>PxyIOR7

MNEKYLDLSYIRLLKKYLWYTGFWPGEALGEHIPLYIKWHRIQIVVQNVIGFVQGAWYIV  
ENFTQMPFV VAGLLYIVASLTVLMAAKCSLTNFKGYQE IIRKLLQEFHLIHHSRGGAYEKKI  
IAKVDKISHYCTVYHMAIIFVLT FNGIPIFNSYKAGAFRGRNLSGMKLELAIYFRYPGFEC  
LDYFYLLSFLNIYFTYIGAVAMFAIDAIVSAIIFQIIGHILILKHDIENLPEPKRETVVVPHTG  
YEGHLGARVRLRLYDDEENKYIHNVLVGIKHHKYILGYVNEVSGFFGPTVGLNYMFHLV  
AGCVLLECI RCDQDVLRLNLT LVGVSLVNLAVHSVT FEIVGSYSEQLIDAVYSMPWESMD  
ISNQKCMKFLSRVQTPIRVTTMGVIVGVIQTMGAILRTSCTYCTFLVTVDEG-

>PxyIOR9

MFKPKESSTINNDRILNYTHYSELPLKLVGCWDWFPDAVDMKKIIANYVYLCLVIFVLIN  
VTAMLMVSLYSEWVDIMSSLDMLADSLPYVASVLV VAYFAVYRAELYELNDFMNKNFKF



HSARGLTNMTMLKSYKMAKSFAYTYTVCSLCSSTMYAVVPMIIHWWTRTPVQGWFFMD  
VTRSPFLEISFLRQILSQIFLGLALGQLGVFFASNSILLCGQLDLICCSARNARFTALLQNGV  
KHASLVSQYHDILKDEEHNYIYNTSEMVDSIYHYDEKVTNDFSRIDFDIYSATHDAHTAAA  
LTAVARQGGQVAAAYKRRFERFASPLLVLRVVQVTLYLCTLLYAASRKLDTMTVEYLLAVSL  
DIFIYCYGNQIIIQADRSTAAAYQSSWHTMGLKPRRLLLNNILLANKRQMIVRAGGFLPMD  
LRTYVNIKTSFSYTYLLVNVNEHK-

>Pxy1OR1-like

MGFFVDNRNRSIRISLTALKFAGFWAPDDLDPKPKTFYHIYSAISFMFLGTYLIIQVVDMC  
LIWGDQLMTGTAFVLFTNLAQAAKLVNLVLRRLRAMLADADAVLRGAAGEEARRIV  
DRCDRGTSQQQLYFCLTTVTVAGWAGSAEKNQLPLRAWYPYDTSKSPAYELTYCHQVG  
ALFIAAYLNVAKDTLVSTLIAQTRCRLQLLTLALS KLHDGMASGSATLLSPAEESSLAASRLR  
ACVGAHQAAALRAAAELQACFSAPTAQFAVSMVVICVTAFLAAVTQTKNYVRLISMGT  
LMNMAFQVFIYCYQGNELREESASVAGGAYECLWYRAAPAPRRALLVMLRTRRPAALS  
AAGFTTSLASFMIIKASYSFFTFLQVVEEKV-

>Pxy1OR1-like(2)

MTFFGVWLPPKRHIILHNIYMLLMVMSQYSFLLFEFIYLFVLDLDDLEAASEASYLLFTQAS  
LCYKTTVFLVNRHLIELLELMRCMFAPETEVEHEKFLSLLAVRIRRLCLFFMTSAITTCTL  
WAMIPLFDNQGRRSFPFRIWMPVTPERSPOYQLGYLYQVAAYISAFLFIAVDSVAVCMIMF  
GCAELDIIMDKVTKVWVWRRLXSKEKRELLDKNYKLFVDCIRHHQGVIEFMVKVEN  
NFHANIFFQLSGSVAIICITGLRISIVSPDSVQFFSMCNMVTMLSQFLYCWCGHELTIRSE  
KLREVVYQCPWYQGGTKFNRLWIAMERMKKPIIFKAGHYIPLSRQTFIAILRSSYSYFAV  
LNQANSK-

>Pxy1OR1-like(3)

MKFLGVWLPMENERYRKHRTITLSTQYLFLLFQIIDIRVFGDLEAVSQASYILFTQACLV  
FKITLFLATKNSLRLLLEQMNSQVFMPOQSTEQERILKLQALKIKRLLLAFAVSSQATCGMW  
ALKPLFDDAGEREFPRMWPVGTESLEYIAGYAFQLLSVCTSAYIYFGVDSVALCMVI  
FGCAQLDVIKDKIVKIKPVTMEDRAAKRALNIFKDNKILVECIHQKIVKFTERIENTYH  
TYLLFQLSGGVGLICMSALRILVVDWQSMQFFSIITYLSVMIMQMYVCCWCGHELTASE  
ELYWVLSEGPWYEQSVQFQRALCFTMLRMRRPMVFRAGHYVPLSRQTFVSILRMSYSYF  
ALLRQTHKN-

>Pxy1OR2-like

MKNTSCLKISIAAMVVTGVIDDLEETAEVSLLLLTHLAQVAKVMTIWGRQARIKHLLYLL  
DDPSFDRSDPAKKAILESTCRFAWFVSKFLVASTLFTALMWGVFPMKPTLTVPLNYPYMT  
SDSPFFIMMFIYQLTCIVLNALGDTAEDFLVGGGLIVLASAQLDVLSFELSHIGQHNDIDINYT  
EAVNCVKYHMKIISFVNELEAIFGLPVFIQFVASCIVIGLTAFKIVMTNEPIQLLTLVLYLVC  
LSELLVYCYFGNIIMHKRGGGGGGVQRQLGTHPACASAGPAASAGGGGRPPLPTQRMLLL  
LMRRAQRPLAMSAGNMFHLSLLTFTAILKSSYSYFAVRE-

>Pxy1OR2-like(2)

MFEKLLSKLEDPNYPLLGNPKLKFVGLLLPEEKTFMRKFYICVHSCMFCFMITEFIDIW  
YIGSDMNQLITNMKSTMLAIVSVNKVVTYLWVQKDWKNIMAYVTKADIEARTCTDEEN  
REIITVYTRYCRRISYLYWLLTYTTAAVIALPMSYWFSSSTYRDNVRDGTEDYYQVSSW  
VPFNKNKLGGLAASAVQSFATTYCGGWISSYDTNAIVIMVFFKAELQLIKNRCSKIFEVD  
DEEIMNRIKECHRRHNVLVKYVKQFDSCLSPVMFLYMIACSVMLCSSLYQTTQSASFTQ  
KLLTTPYLLLGVSQLFMYSWHGNEVSFMSNELIRGIYESGWWKATVRREIILLVGTDRP

IEFTAGPFFNLTIAVFVRIVYKTRLILSKDDQDTMSSAVLSPNSILKGAYSYYMIIKK-

>Pxy1OR2-like(3)

YLAASAVQSFATTYCGGWISSYDTNAIVIMVFFKAELQLIKNRCISKIFEVDDEEEIMNRIKE  
CHRRHNVLVKYVKQFDSCLSPVMFLYMIACSVMLCSSLYQTTSQASFTQKLLTTPYLLLG  
VSQLFMYSWHGNEVSFMSNELIRGIYESGWWKKATVRREIILLVGTLDRIEFTAGPFFNL  
TIAVFVRILKGAYSYYMIIKK-

>Pxy1OR2-like(4)

MIKSFLRSLEHPKHPLLGNICVLVSSGMLQYSEGIMKYFINSIHLFASLFILTFQFYDLWLNR  
ADVEKSLRDLSYVILSVNGSVKTVAFILCQKYWKDILESVSSELSQLSKHDRKATMIIRQ  
YTDYARKFTYFYWTLVTATVSVVVLAPFVSYFLSSKFRQDLSDGTVTYPEILSSWTPFDKT  
SGIGLVIIYITTDVLCIIGGAVIASYDTSIVLLIFFAGQLKLLKTNCARIFGEDCAISPTDIYTN  
LRDCHRHHVFLVKYAKILNSLLSPVLFYVITCSLMICASAVQFTMDTISLMHKLWVAEYL  
VALISQLFFYCWHGNYVVKSEQVCQGIYESAWWQHCVPSRKSILLGGQLRKRIVFTAG  
PFATLTIPTFITVMKGAYSYYTLLSKKEK-

>Pxy1OR2-likeisoformX1

MIAMAGQLEALSEMFRRALDTDSEEDQYRNLINCYKRYADILFTQKRLNKIMSPILFMYL  
LIASINMSLILFSLANLKKSSKIASQVLVVSLLVVEAFYYYWHGHQVMHQSENISAAYDSD  
WVDKSPKIRRLVYIMSSTVNRKRVYNAGPFNEVTVITFIQVGNDSIILVSYLIKENGHFSKA  
P-

>Pxy1OR2-likeisoformX2

MIAMAGQLEALSEMFRRALDTDSEEDQYRNLINCYKRYADILFTQKRLNKIMSPILFMYL  
LIASINMSLILFSLANLKKSSKIASQVLVVSLLVVEAFYYYWHGHQVMHQSENISAAYDSD  
WVDKSPKIRRLVYIMSSTVNRKRVYNAGPFNEVTVITFIQVIVKVTVSFYKLMCTTTLS DAG  
S-

>Pxy1OR2a-like

MARETSLDTFNQNKLFWKITGIWVTQVKNKRFKYAIPVIAIVFVAYDLFLTLNLVYTPKK  
LEVFMPELIFFCEVQNAFKVYVMVMFKSEQIIQAFNMMDTEEFIGESEEHKRITKKAKLLFI  
KAFKVYFVLCNAGFGCISVLPFVNFVLFVFGKPNLPVCNYYFLSDEWRDQYFWWILLYQT  
YSVYNHMMYNISIDTFMSGLILMGLAQFRALNDSLKNIKCESNKVNDPAEEWRLRTELK  
CLKHYDSLRYKCTHIQDLYDPAMFVQISVGAASNCVILASLLSMSNDKSFIIYGSVMAI  
EILMPGYLGSQYQYECDELVRSVYSCDWIERPESFKSIMKLLCERAKQPIILTTWYIPLSLN  
TFISIMKTAYSSFTILRAVHTRNMVE-

>Pxy1OR2a-like(2)

MPPETISSAFYSNVRGWKIFALWIREVNNKYYKYAALSFLYFLYDGLLTLNLIYSPKNL  
NTFIPELVFLTSFVLVFKINMVMFKSKLILRAFSIMDSIFSGETVEQKRITKRYVEIDKER  
DANIYLYWCYQSLGNFAHMNYGVNIDTFIPGLIMIGIGQFKALNVRLSNIKTYSKXNLVDI  
EQEKKLEEELIKCLKHYDLLREYCSLIEEFDTAMFVQFGVGAAINCVTLVAMLQLPNEM  
FFLILYGVIMAIEIFTPGYLGTQLEHESERTTSAVYECDWMDRSPRFKRNMMMLLVERANTS  
VELTALTMFPLSLETFSIMKGAYSCFTLVRAMNGREDTK-

>Pxy1OR4-like

MAETAGGGSFQDAVDIFRMMPCVGYLLMAMSKSYKMVVHRPVYENLVSELAMWPRG  
PVSKEEHEIISGALRTLNYVVQGYWCNNALLVIFLSPPFVEIGRRLAGLEVPLILPFFYWF  
PFDPFQKGYEYVLAFTQWHGLITWFMFCGDLFCVFLSHVTTQFDLVAARARRLVYVP  
ADRQMPGEYPLGVYSSAYLLEDKASVESFSYQDWETRHHQKELTEIVQRHHALIRLAGDVE

RMFSFALLVNFNSSFITLFCFCGFCCVIVEKWNEMIIKYSFLTALSQTWLFWCWYGQRLLLESS  
EGISDSLYKSGWYLAACKIKSSIIYIMIHRSQKEVHVTTYGFSVICLASYYTTIIKSAWSYFTLL  
LNVYKK-

>Pxy1OR4-like(2)

MEIPSFQDLVGQIKVNFRTYGMAYERPQHSIIIFYIPFIVITGVVIEETAFFVSRMSENLELT  
ELAPCLAMGLLSQLKILPIFLKKEKVYKLEALEILYNSIRNDPAQVVVYKNDVVQIKILIK  
YYFILNVILIVCYNFWPLLIMLYNYAVNGEIQFLVPYAILVPFSYDSLYTWFPVFFHLISGGFI  
CVLYFTTVDALYFFLTSQVCIQFLVLSNELEKLQNEQTKLKDIVKKHQYILSLSDDEDIF  
SLPNFFNVIVGSTLICALGFNLTTGELAKMPKFLFLSSVLLQILMMSVFGEHLIQESGRIAD  
AVYLCRWYEMDQSTKNSILIMRRARRAQKMTAYRFSVISYGSFTKIISTSWSYFTILRTVY  
KPDIN-

>Pxy1OR4-like(3)

MFPNGDYKESEDIDEEAESDIVDSLKLSRKVVVFLFWTNLLILLFDLRPLIVLAFKYFA  
HGQLELSLPMFMNYPFDPYDLRFWPIAYGHQCYSSACCIYNLIGPDTLFFVCCTHLYMQF  
RILKRRLEIFITGSEIGGELEVAKKFSILAKRHQKLIELVGRLERVYSTSIFLNYGCSSFLICFT  
GFNVTTLNDAWSVLNVLVFFSSNVSQIFLICLFGDLIMNSSREVADGIYNCKWYATTPKIRR  
SILFYLVRSQKPKLTAINFADVNLISFTTILSRWSYFALLRTVMSTRSQDQQTAAIA-

>Pxy1OR4-like(4)

MDDFIEISNTFAVTFVVLQAVVKSIAVVHRNEDITYIIRQMAALWPKEEHLNTRQTVVKMK  
HLKRLNVCVTVYYLNVIGSWQYILVPLELTLFRIFVLNQQSMLKFPFGCSFPDPTESWS  
RYLMVYAYETFAMIKLVYFLVGTLLITMTAHLILFTLLSDDLILQPSSRVDGEARDDEI  
TYFEADRHEKRIGDIVRRHQKLIKLSKMFDDIFNKVIFYNVTVSTVSICFFGFVAKIAKNPG  
EIANNVGVIA SILPIFNLCYQGQLLTDASSSLALSAYLNIWYAKDTRFQKMLGLIMLRSQ  
APCCITSYKYAPVTLNMFTGVMSTTWSYFSLICSVYEE-

>Pxy1OR7a-like

MRLSNIKSKSKVKDLQHEKHLEKELVQCLKHYDMIREYCSLIEELFDSAMFVQFGVGAL  
INCVAFIGLLQQPTEGRFFMMLYDVMMTSGLTTSAAYS CDWISRSASFKRSLVLLVERANQ  
AVELTACSMFPLSLATFISIMKGAYSCFTLVRAMNIREENE-

>Pxy1OR10a-like

MTSAFTPAAFSCLIVGIVLTTTFVYVGNVSQVMYLLRVLPDRLEAFKACNCISATSVPLST  
FVFMWTARNLQKVFAMCRLGLTFASKESLAHAALLRTLHKSQRLAWLVIANQGFSHFYI  
LVAPLLLITFGNGRYLPTTPGDTYGLSPKYESPFFEITFILTTIATAFSAINQTYIILFITLVGH  
ELGNFYAISETLNHLHETMLDRNIPEDKRTTIHDTLVFCIKHHQFVRKYHAMLKDLYQTI  
FGAHFLMMTIVLVTTLQTLNAWDVRNTILTGTGILPLFLYCFGGELVISAGEEMAAALYS  
CGWELMPATQARLVLMMLRVMQKPLHLTAANIFVMNRETFGDVAQTVYKIYTVFN-

>Pxy1OR13a-like

MESLWQNFRSILRRFLPYGVLDSDWDDLNPRLYLAVHIYWLKFFGMWYNKHSPRSLLYWL  
QLLYGAVVLFILTCILPTFGEVYLLQHTDDVDGIAEGLYFLSEIYTFKISVFWWNKAAAIL  
SLLRYLHCPEFRATEPEHRPALRRRVAARFVMTYYSTMCVAVSVGQIEILAFNLQNF  
MLAERRRRRDADAGRVDVGKGVVARPDDYYVMAVLKDCIKHHNSIISYVALIERAFSL  
ASVLQMLSAMVLCVGVQFLSIENPASHPMQIMWMVIYLSMCLIEVFILCWFGDDLWK  
SSSLRQA AFDGPWRRCGRRAARCVLLMTRCQRPLAVTAGKIFPLSLQTYTLLINKFKAFL  
SL-

>Pxy1OR13a-like(2)

MTVMSMGYKGCWKPRALSLDYVRVRLFLWFNGAWPGDELGEHVPLFIRYHKYHVLG  
QFTLGLAGEVNFLRKFYKDISFLMLGHVYITTTFLTLVTLVRSSLPHFREYRNIKIFLTFEHL  
CYHKHKGKYEAKICAFWDWLSYWFSLYQMALMVLGMTLNFALPVYKSIQAGAFRTTDL  
HNKTLEFAVYYTTPLFHCYDHFYLATTLNLYVSYLTSCSVCAQDLLLLSLMIFQIIGHIQILNN  
SIENIPIAKGLKYNMEENTEVGIKLIAIIDHHRDIVRFAANISSFFGPMLAINYMFHLVSGCIL  
LLECSRDPETLARFGPLTVIVFGELIQISVIFEIVGYISEKLIDAAYCMPWESMDVSNQKTV  
KFFRSRIQTPIQLTAMGIVPVGVQTMLKILKTTFSYFALLKSMNE-

>Pxy1OR13a-like(3)

MRLTRYISRKPGALSLDYVRTVRRFLWFNGAWPGEVFGAEVPRFIRCHKYLILVQFVLGLI  
GQVNFLWKFNKEISFLMMGHVYITTTFLTSVTLVRSLPPFFQEYKNITEEFLTEFHLYYHKTK  
GKYEAEICAFWDWFSSWFALYQMALMVLGMTLNFALPVYKSVQAGAFRTTDLHNATVE  
FAVYFDIPGFHCYDHFYILTALNFYFSYITSCSVCVLDLLLCLIVFQIIGHIQILNYKIENIRTP  
EGLKYNEDENMQVGKTLIAIIDHHRDIVRFAASISSFFGPLLAINYMFHLVSGCILLLECAR  
PDPETLARFGPLTVIVFGELIQLSVIFEIVGYKSEKLEAVYCMPWESMDVSNQKTVKFFLS  
RIQTPIQLTAMGIVPVGVQTMLKILKTTLSYFALLKSISE-

>Pxy1OR13a-like(4)

MVPAGAVYLDYVRILRRFLWFNGCWPQGQLFGEVPLFIRYHKYHVLGQFTVNLMAQINF  
LWKFKDISFLMMGHVYITTTFLTSVSLVRSSLPHFEEYRNIVNTFLTEFHLYYHKQKGYE  
AEISAYWDKFSYWFSLCQMALMLLGMTSFNVLPYKSIQAGAFTRDIDRDNVEFAVYFAI  
PGIDCYDYFYILTALNVYFSYITACSVLDLLLSLIVFQIIGHIQILNYNILNIPMEGLKYNK  
EENSIVIGKHLISIIDQHRYIVRFAATISSFFGPMLAMNYMFHLVSGCILLLECARPDPETLAR  
FGPLTIIVFGQLIQLSIIFEFVGYISEKLIDAVYCMPWASMDVSNQKTVKFFLSRIQTPIQLTA  
MGIVPVGVQTMLKILKTTMSYFALLKSISAD-

>Pxy1OR13a-like(5)

MEPSKVLVSPGHKYFEFNLKFLFAVGLWPHKEWCRNKLELYKMYETNLHILSVVYLIISSI  
GTYNIRGNMEILMSNLDKSLIGYVVFVKIFAFAEIKRKELRSLVNDIMQSGDKITKKCEDRM  
TSLLMFVMILVTMIVSAFMSALYDGMTVEAWMPFDPLQSKHLLMAAQILAVTFMPC  
ALRGVGLQGIVCSVIMYFCEQLQDVQMKIRHLHYSRDEEVRQEFKDIVKKHVRLIRYA  
KSIENVFNSFMLFHNLAHSVCLNALMISVVGTEEKKTLVNFLAFFGIALNTYILCYLG  
NEMIIQSEGISQAAYEASWSFWPIDMQRDLLTLITVSQRPLKLSAGGIAVISLQTYCQILYNG  
YSIFTMLHDM-

>Pxy1OR16

MSVDPTVQEQAQAEILQSLNLSIFSMRQFGLSFDKPPNRRAFIKQKLILYLCFFGISYHIFSD  
IVNIGVTLATTPRVEFVPLFHTFGYALSSFKLWSVWYKDVFEQRIADLVDIWPVPLA  
PELQAIKDKSLLALRIAHRFFGLNVSAVWIFNLTPVMYVYESWWQGRPDAVVGFPWTC  
WYPFDKWDPTNHVVFVYLFEILSGVTCVWAMSASDLMLTGMASHICMLLRILHQRLTSLA  
ASEQPPPDHYRDIWSCIKLHQRLIVYCNDEEAFSIVNLVNIVLSSINICCVFVIVLLEPLSA  
LSNKMFLGAALIQVGVICWYADDIYHANSAAAAAYSCQWHKTSQSCQALMFLIKRSQ  
KPIALTAMNFTNINLTTFSILYKSYSYFALLYTMYKEN-

>Pxy1OR17

MEITVNNEKKQKYQNFNGTFRYCTFALAIALIYPNPSRRVKKIKFMVFCLILSVSFVLLWFI  
SYLYFCYIARDMFNFTRNMTVGIVIFLFFFKTFYLNKSDGFGVMDAISDDLKANDMD  
EVYQEIFDQYIKKGLVAQMIWIFIVQTCIFPVHAGLTMFFNLINVPQPRVMVLEMDILM  
VRSKQMESPWFEIVWFYITLGGFVLPNFIGFDGSYCVNHLCLKLRVLTEKLRRFAETT

TDEQLEKRVKEVIKEHQASLVYYNLLQDVFGGWMFVVFITSLEITFNLYQLSLGGMDPK  
YLIFAFSTVVHNFVPCYFCTRLIEHGDDFCEALYMMMPWEARHCQSVTRALAFMIARTQGP  
LFLTGMGMVTFNMELFVSVMQSSYSFFTLIRD-

>Pxy1OR18

MARETLSDTFNHNKLFWRITGIWFRQVKNKRFKYYAIPLIAIVFVAYDIFLTLNLVYTPKKL  
ETFMPELIFYFCEVQNAFKVYMVIFKSHQIVQAFNMMDSDFIGESEEHKRITKKAKLLFIK  
AFKVYFWLCNAGFACNSIVPFISFLIFRTKLYLPVCNYYFLSDETRDHFWYILTYQTYCV  
YNHMMYNISIDTFMSGLILMGLAQFRALNDSLKNIKCVSKNKITDEAEERLRTELVKCL  
KHYDYLREYCSLIEEYDPAMFVQISVGAASNCVILASLLSMSNDKSFIVLYGSMALIEI  
LMPGYLGSQLTYESEELVRSVYECDWIERPESFKRILKLLVERAKQPIILTTWYIVPLSLNTF  
ISIMKTAYSSFTILRAVSTRNAEESS-

>Pxy1OR23a

MGHFSTFECFRPHFNALARVGYFKIVMRDIPRHKYMLHSAYRAVAFCLVLLYNLQHVVKV  
YKSRHSTDMIINVLVLLTTLNLSKQLAFNLSRRVDRLIRVIDGPLFACSKPNHDQSMSQ  
NATEMSSLLTLYHGAIFTCGTLWAVFPLVNRALGVDVAFTAYFPFDTSMTPRFELAIAYLTV  
LITFQAYGHVTMDCTIVSFYAQGKTQLQIFRYNLEHLVDAHDESVKIDGNLNCNNNDLVG  
YKDMGYEARERLKKRFVRCLLHFRQIVWFINEVELIFFEAMVLQFLVSAWVICMTLYKIV  
SLSILSAEFVSMAYVLGCILAQLLSYCYGTQLKVESEMVNQSIYCCDWLQLSPGFRLLL  
VLMERCRAIVPRIAFVIPLSLETYIAVLRLSYTLFTVLDRK-

>Pxy1OR24a

MLKLIQSKLEDPNEPFLAPNLKSLHFWGIIIPNNAFKRKIYMCMHASLLLFASIVYVDIWF  
RSDFDLLLKSIKYNLLTTINCVKIVTFVAWQGEWLDVIKYVSNADKKSRAKNNEVQNGHIQ  
SYTRYCRVVYTSYWFLLTCTVTLVVLQPIAKYCFSPAYRESVRNGSELFDQVLSHKAPFNY  
DHFVEYIIALTYTPWATYAGGLINSFDTISICIMVFFKGGELQLLESSCTMLFEGGDKGSVFR  
NVKECQNRHAELVKYASVFNGCLSPIMFLYVLVTSFGLCASVYQITIETSTMQRLLTAEYAI  
FGVAQLLFYCWHGHVDVIHASHSPMRGVFESGWWKHNHCRKEILLTGQLDQRVYFTAGP  
FFNLTLGSFVNILKGAYSYYTLITQKQ-

>Pxy1OR30a-like

MEFENDFSLKEWAKDKPLSILQLDPADRAVLRIAGEPEKKFKPIAETYRKFTLAMVMGMM  
YPNPRTERRRLIYLLIISISFWPVYVMWFYDVFHCLQRLDVDNLTRQLSLGVPIFCQFKM  
FLVTILRKKMQNLIEEINADYERYNCMDAGYQAIMENQKSLKLEKVVTYMVLATVAA  
FPLMALYQTTEHHLFKEGQRFMVHDVDVPWLKEQRFESPYFEILFVYMVYIALVLVLCYT  
AYDGMFFLCIFHACLKMKIISHQLMGALRDHDDVEQMKNIAVVVEDQCETFRFVDRIRE  
EYEFWLQVFGLTGIQICMNMYYQIITSDAAEVSNSAYCAGWEQLADSGVRRSIAIMIARA  
QIPVQVQALNMVTFNMELFVSVMQTSYSVFTLLRS-

>Pxy1OR43a-like

MEKLSYKSLSPHVRMLQVSGILPLARDAPPWKYRLHQAYTALMTVIPYLYALQNLGHMY  
KSDKILNSAYSMDWLQLPVTHRRSLLIFLERVRTPIQVVAGHIIPLSAATLVQRRVNPPISAS  
PVSKQAMSELAFFSMEPHLRVLRASGSYHLDRASPPWRYRLHRVYMGFVIFLPYLYVAQ  
ELAYVYTVRGNPDQVIYGLFKLFSYIDFIYKKMVLKADRVENLLNTMKGPLFNQEGH  
HREILLTQVASAKSTLYIFNFMGNLSCLVLLVPIVQYSRGHEIRFLLFPVEINKAPNFYII  
MVYLSVQWVNHAYINSTLDVFMSCLLGQCTAQIRILRLDLETAVARSHEKARQESISFSEA  
FHKVFTVSLHHKEIVRMAVNIEDIFGGAMFCQIVVTGWIFCTTAYRAVDMNPASVEFCSM  
ITYITCVMVELVLYCLFGNRLAIESDKIPNSAYSMDWLQLPVTHRKSLFILERVRTPIQVVA

GYIPLSASTLVQVLKSSYTFYAVLNKSKEI-

>Pxy1OR47a-like

MYAASFQVRLSEAMVVDKQPEMEYQVMKTLLKIWKDKFIHENMSRKDIKCTLMHGYYIF  
VLISVFLPIVFEDDIKVMLEILVPVFTLVESLSCYYPFLVYRKEYYAIMRDFQVFYEKHKHQ  
PAYRQLIQTCDGNASSMVRIFRVGLGACVVLVPAYPALKHALQAGPRRVEPPVAAYYPVEI  
GEPANLIITYTSQCVCYFMQSICLSNISAPIYYFMAVVAHFQVTRQKFKEIEDAKDSQEAL  
HLQRC AVRTHQQTLEFLQRVQRVGSASYFILISCAAIGYSFAFFQLASTDDLATIIYYAQFSA  
GLSSHTFLLCYYGQKVIDEINALTFSIYSVPWYRYNAGVTRSLVLSLSRAQGTAPVHAWKF  
ATVSLITFQSVITTAYSYLAFLLETMMTQN-

>Pxy1OR49b-like

MSTYRQIDCFNINVKYWKFLGIYPRRDTRLYEYYSFLFISFFFVYFISLTTLNFWFIPGPM  
LFIEETIFYTTEVALLAKVFTFVCMKDKVVKLLDILESDFQPDNHRKIVKDAKKFNITY  
WKVMAAISYLSNSTHVLSPLFTHLLTGADLVPLCSYLFLADDFRNAYIYYCYTYQSIGM  
HFFMLVNVNVDSDFIQGLIILAIAQLDLLDDKLRKVTENNNIDKDSRNESDTNEDIDYVRQL  
NKCIHFVKVAKYCGLIEEVFSLVLFVQFSIASVILCVCLFRFTLPAPREYYIFLVTYVFVMV  
GQILVPCWFGTRVIYKSSQLSLAVYDSDWTPRSRRFKSNLRLLLVERLNRPLTIIGGKMFP  
LVTFTSIMNSAYSFFTLRHMQSREDEAN-

>Pxy1OR49b-like(2)

MARETLSDTFKHNVLFWKFLGLWIFQVDDKRYRYYAIPVVSIVFVAYNILLTLNLVYTPKK  
LDTFPELIFFFCEIQNAFKVHMVMFKSKQIVEVDFMMDSDVFIGEKEEHNRTIKSKLLFIK  
VFKIFFVGCNMSYICHNPLISFLVFGTELNLPVCNYYFLSDESARKHYFWWILVYQTYGIY  
HHMMYNLSIDTFMSGILVGLVQCRALNHGLQNIKSSAPKKENDTEDEKRLRMELVKCIQ  
HYDSIRKYCAHIQDLYDPAMFVQMGVGAASNCVILASLLSMPSEKALYVSVLMYGTV  
MAEILMPGYLGSQTHESEQIVRSVYSCDWDRPESFKRILKLLLERAKRPIILTTGYIVPLS  
LNTFISIMKTAYSSFTILRGIHKRT-

>Pxy1OR67a-like

MQLLSSIWRKLTQTRALEYSSGSYETQFFETVYRVMFLAGVSSHDRGLRLAYSYLKLT  
VVFVGSSELWYLFSTADLDHVIDNINVTLIHLIAMRYRDMMRHKAIYKRLAGAMESPH  
FDVSTPARRALLQAWARRSERYLQLLLALGTCTLAAWYVYPLVDDLDYNLTVAVRLPYD  
YRTPQLYAATYLATLVAFNYTSYFVMVNDLIMQVHLMHLLCQYTVLADCFRNILEDCKEN  
KNENYHSLAWGDKYVKRLGDLVNQHKFIMSNTLELKRIWSTPMLMQFLASSMLICLAGY  
QVTATIKLSITKFLMSLLYLAYNMFELFIFCRWCDEIKIQSENIAEAVYCSGWERGAAARGG  
VRARLMLVLTRARRPLVLTAGGLYDLSLASYSTLVKTSYSALTVLLRVSD-

>Pxy1OR67c-like

MSLPSFFCTLVQRNLIFFTAPNVGVC MISALKYSIIYNNKPYDRFFKHYGEDIWQTIPE  
SKENAKVISKYTFISKVINRVFCYSLPLVLYVDSFPWLIMKFQTKFLGKEKQLLYPFDGW  
YPFDKTVWYFAAYSWEGLMTGIVVMIYMYSDMINIFS VTSICMEFRILGISLKNLVSDEDIQ  
QMKGKDAEQVNRRIKNDLKTILAKHDVLAGMCKELDQLLGNTMFANYTSGCGFICLTAF  
TFTVDDDFYQSIRCFFFLSLLAAVL DHCIGQIISDHSMQLADAIYSSNWITHADQSTKRTL  
LILLMRTQKPFELTAKGFVTMDLNTFTDIMSTSYQFFNLLRTCYLPQMGEI-

>Pxy1OR85d

MSATEKFDHSLYRTKMALLASGIKFSEGYMKNKFLDHIINYWLFYFNCFWLYMDVIGELIW  
TYEGIQEGRSFEEISVMAPCITVCLLATAKSMPLYLQRGILTNNVKELREIHPD TDGDESED  
DDGERRNDEDVVLERDIAKAAIKHFDSIMQLFLFCVSVFTFFSLIVSLN VYGSDSL FYA

CCNFIQMHFRLQCQIEFLIGRQWGPNDSTLNEKFKGIVRRHQGLTEIVRQLEFLYSYSSL  
FNFVTSSFLICLSGFIVTTSKETRLVLCFVTFLFMSLAQISIFCYGGDLIMQSSKDVSAAGDR  
SRWFVADERLKRSMFIVLARAQRPKLTAANFADLNLSAFATVLRRSWSYFALLKTMNDQ

-

>PxyIOR94a-like

MEENLAISVFRPHLKVLRSTGLFQLDPRTPRSTFLLHQAFMRFSLLVPLVYATQEVVYMY  
QVRSDTDKVIDSMYLFSLFVASVYKQVILWLYADEVEGLMDIVKGPLFNRRDDEQKVILR  
DLARRAKFIHNWAFGLTQVTCVLWTLKSMVMHLSGSEVDFAIWLPFDHNRHTYFYFVLF  
YYWLVTSWLGCNDCNADLFASALLAQCMYQLSYLRIDLETLVETSKEKALKEGRVFHDV  
FQEKFKMLLLHYNEIIRLAKGMEYIFGGSIFFLVTGWIFCTSTYRCVNINPMSIDFASMV  
SYMICVLIEIALYCYFGNGLSYESEQLLYSAYNMDWLQLDTRHRRSLLIFMERVKRPVHT  
MAGTIPLSAGTFLSILRSSYTFYAVLKTTTSVSEHI-

>PxyIOR94a-like(2)

MEEKLAFSGLKLNLRRCMRILGTMFLDPGAGLLQYRIHRVYMRMAILLPFLFIGQQLINYQ  
VRDDADMVMDCMFNLLTFVNNINKQMTLIWKKDQLQALLDDLKGPLFNQDDVRHHRIL  
LDFYRWSRVVFWVCLSMPIITMVMWSFLSRLPTHRGGNAVEFGIWLFPDPNDDAYFTLV  
MLYEFTQLTWLGCNDCNVDTFVTILLQQCTTQIRILRLDLETAVERAQENAASEGITFDEAF  
HKVFTLSLRHYNEIIRLSKNIGHIFGRPIFFQFLVTAWIICIVYRIVDVNPTSVLFISMIAYS  
CIVVELFLYCYFGTILTYESMKLTAAYYMDWLRLPSRHRRALVIFMERVKSPIELLAGNIV  
PQSTNTFVSIMKSSYTFYAVLKSTNQIDAAIP-

>PxyIOR94a-like(3)

MEENLAISVFRPHLKVLRSTGLFQLDPRTPRSTFLLHQAFMRFSLLVPLVYASQEVVYMY  
QVRSDTDKVIDSMYLFSLFVASVYKQVILWLYADEVEGLMDIVKGPLFNREDERQKTILR  
DLARRAKFIHNWAFGLTQVTCVLWTLKSMVMHLSGSEVDFAIWLPFDHNRHTYFYFVLF  
YYWLVTSWLGCNDCNADLFASALLAQCMYQLSYLRIDLETLVETSKEKALKEGRVFHDV  
FQEKFKMLLLHYNEIIRFVINPMSIDFASMVSYMICVLIEIALYCYFGNGLSYESEQLLYSAY  
NMDWLQLDTRHRRSLLIFMERVKRPVHTMAGTIPLSAGTFLSILRSSYTFYAVLKTTTSVSE  
HI-

>TcasOR1

MMKFKVTGLVADLMPNIRLIQASGHFMLNYHADNSGALHTLRLGYCCMHLVFVLVQTFE  
CNFVNLVLERGDVNDLAANTITVLFTHCVTKFVYFAVRSKLFYRTLGIWNQPNSHPLFVE  
SNNRYHGIALKKMRRLYIIIIWTSFSAIAWTGITFVGDSVHNIKDPENENLTITEPIPRLLVK  
AWYPWDAMSGMPYITLVFQVYVFFSLAHANLLDSLFCSWLIFACEQLQHLKEIMKPL  
MELSATLDTYVPKSADLFRAPSATSQDQLIENGTPAKKNEDLKGVYSTRQELGGHFRGG  
ALQNFSGGGVGNGLTKKQELMVRSAIKYWVERHKHVRLVTAIGDAYGVALLHMLTS  
TIMLTLAYQATKITGVDKYAATVLGYLLFALAQVFHFCIFGNRLIEESSVMEAAYSCHW  
YDGSEEAKTFVQIVCQQCQKAMSISGAKFFTISLDLFAVVLGAVVTFYFMVLVQLK-

>TcasOR3

MKLSSVTTCLFSSDFHTRMNFDWKDTIKLNFLMMKIVGLWPKEYKINFYTLTYLISVNL  
FICGHVIFHTVAVFVVGRLDKHLIGALYMSLTETLLLKICYFIKNSRLVKSLLTSLDGDIFQ  
PKNEKQLELTPSLIFWKKVHKSFAILVANTVFLFVSLPILSKSTKLYRPLEAWYPYNTQK  
SPNYEITYLYQFISTLFRGMASVSMDTFIAALNMYIGVQCDILCDNLRNLNETNFMENLSL  
CIKHHKAIVSFARECNKFYNGIVLGQFFSTIALGLAMFLLSLVTPPLSTESNTLLFYLGATTS  
EIFLYCWFGNEVDVKSSKIPYSAFESDWTGAPIEAKKNLLIFILRTQKPIKMSAINLFSLSLE

TFTTILRTSWSYFAVLRQVNGQA-

>TcasOR7

MNKLQKFDWKATIRPNIAFLHYLGIWPEGEEYYKLNFYTLKTILYIIILVISTIVFQVINIFFT  
LDDLTSLTANIYVLLTEILYFIKLCFLVKNMPALKLLMKTLDHKLFPKANQIVIIQPLLNF  
KLIFLAFVITCSFTVLFWAIFPILDSSEEEKRLPLLAWYPYDTKISPNEYELTYLHQVASIYIC  
YSHLNIDTFITALNTYIQCQFDILCDNLKNIKSDTKNVDTKLAKCIKHLLILMFANTSNEF  
FSWIIFQFTSSAAITGMTLFQLTVVKPFTEFYNFMAYVTAEVVQIFMYCWFQNEVQVKS  
SNIPYAAFSDWTEFSPNKQKSLFLITRSQKSVKMSAFNVFDLTTDSFILKSAWSYFALLN  
QVNS-

>TcasOR17

MDDFNWISTVKTNLLLLHIGGIWPRGDGTHKLNLYTIYAIFITFTFTTYHCFSQIINFFVDD  
LQALTESIFISLIQSMALVKAFYILKNMRILKNILKNLETNKMLQPRNLKQIKMVQPSLTQW  
RLLSQMFWISAVFAMCLFGAFPIVESTYKEFRLPYLAWYPFDTKSSPFYEIMYLHQFVSSY  
TIAIVDIGADTLIAALNVFVATQCEILCDNIRNINGSVEEMDSKWKECFTHHKEILKVARHC  
QKFFNWIVLMQFCASVICGLTMFQTLTVVSFSSEFFSSLFYFGAITVQIFMYCWFQNEVEL  
KSSKILYATFEANWVEAPHQVKKNILFAIRCQNPIKMSSLNVFYLTLETMAIFRTSWSYFA  
VLRQIQNRISEE-

>TcasOR20

MNSFNWQESIKTNLALRLVGLWPKSDFYKFDLYTFCTSLTVGVIVCGHNLSQIVYILQVY  
SDLKALTATIFVASINFLGAVKMYFFIKHIKTVKILFKMLKTYQFKPKNIHQTLIKPFLNLW  
KILYVGYSINVYLIVAMWSLLPVLNGWTWQKLPFPARYPFDVTKSPYELAYVYQFICI  
WYITVANLNLDTINIALMMYTSCQCDLLCDDLKNLTETRFHKKLIECIKHHKAILVFAEK  
SNGLFNMIVLSQIATSTVVLALTMFQLSMVSPLSSEGLNHLFYIGGIIMQILLYCWFQNEVE  
AKSSNILYAIYESTWFEASKNSKKNLLIFSIRCQRPIKATAVKLFALSLRTFITIVRSWGSYFA  
VLYNVGSK-

>TcasOR24

MEEDFDLSSSLQTTFLCLRCVGTWPSNTYKLDAYTLYATASITICLFGHNFFQTVNIFFIFND  
LNTLTGVIFVALTCLVAILKSLFIFNMRRLLKLLLVDIRQKLFKPRNRQQVVMVQSRVNF  
WKKIYFMFTGMGVATMFFWALFPIMDGTVKEHRLPFLAWYPFSVKNKSPFYEITYIYQIVSV  
FFIVIVNMNSDMLLVALMNLGVQCDDLCDNLKNIQFRERINEEFLRCVNHMMQILSYASD  
CNKFFNTIVLAQFFTTVVSGLTMYQLTIVTPFTSEFYSFIVYGGAVLMEIFLYCWFQNEVE  
FKSLNIPFASFGFDWTIGSVGLQKNLIIFIAKSQRPIRMSALNLFHLSLETFFVKILRTAYSYFA  
LLNNVNSLN-

>TcasOR46

MSKSEKIHTLATYFDSNIAFLKLTAFWIYDDETTRRKKYLQHAYNIFWIFYLVAYQPAELL  
YVYYSFNDLSVFLRALRDIGNHVSLEYKAFNYFIMRRDILKLMETLQHGNHYHEDCGDF  
QPKLIVDEEKKEALKWTKYFLNFCNAICLSMFANGVFTFIFLSDKQYVERNQRVYHQEQ  
PVNTVSPFGSGTKLRFVTFIYTMIALTFYAWTIVALDSLFTIMSCISSHLKILQGAFKTVRA  
RFIKLCASLSKLLISVSGKLESIYSTQTFVQTFISLGEMCFSLYLLSETADQNIGNEITYLIATG  
FELLMYCWFQNRITEASLKISYALYESDWFPSTLSFKKQIIFTMTRMQKPINVTIGKITPLAF  
STFLTIARGAYSFFTFLKQRHGINH-

>TcasOR58

MPFTIKDYDLRNAFETERTLLTSLSGFYPRRTKKYNFFYNTSALINLFIAYGQLFSMVVQMVI  
DRNELSKLSETLLFFMTHFTFLCKLTNFVYYKKKMFIEDNLSRKIFYGFELWQIKPKIDSC



KFIAKIFRILCILVFLFYTLVPLYDDKEDLSLPLPGWLPYNTKKYYYPTVIFQVMSVSVSAY  
NNSSIDVLCMLITVASAEFNLLKGALKTIDFHPKGHNTKQLIEAKFENCVNHHEIVKFA  
YQIETIFSKGIFLQFFASIIVICFTGFQMIVVPIPSMQFIFLIYFSCMMMCQVAMYCWYGHDIIT  
TDSIGQAFYMSNWEYSDVKIRKNICIFLERTKKPVILTAGKFVTLSTTTTLRSSYSYFAV  
LQHLYKEDS-

>TcasOR59

MDEEFLIGTFETEKFLRYGSFYPCGKRIKFIFLGLFMFVYSWTEFLSMITVLFVERDNLTK  
LSETLLFCMTQAAFLKLVNFLYHNKTMLRIESILKNPILNCLDQFEKNIIEKYMIRVKYLA  
RLFRILCILTVSFYGLFPFIDEDPDHMLPLPGWFPFDVKTHQIELVIAQTCGIAIGAFLNSTLD  
ILPTILITLGSAQFDILKIRLENITSVDTSKSWLVKKAIKKCVIYHTILLNYITQIEILFHKGIFV  
QFTASVVVICLTGFQMLVISVRSIQFILLMIYFSTMTCQIALYCWYGNELMYRSMGLSDAC  
YMSEWNKCDTSVCKSLAIIMERGKRPVVLKAGNIFSLKLTTLMTVLKSSYSYFAVLQRLY  
ATSE-

>TcasOR60

MSEDYTFRNVFAREKKILTISGFYPLREYEKNYFHFFSGTIQWIISLGMFLFSMIIQSVIKRND  
LMVLSETLYFLTTHLTFVCKLANLEYHKKLLLDIEDMLKTTRFQKTLSDLIEKTGMNEKI  
RKFNLVAKTFRIVCVWCVVLYVLVYPYFDPGKSKTLPTPGWFPFNWTDKYYYGYFFFEVA  
GISITAHMDSSIDILSWLLVTIASFQCDILKENLNKIYNYDKEHDIRETFKDCIRHHEEIIKF  
TTKVEQSFSQGILLQFLCSALVICFTGFLMLVVPVLTQFANTIMYFCCMMIQLGMYCWYG  
HEIMTTSDEIGQYFYLANWYDSSLTLRKDFAIFLERAKRPITLTAGGFVVLSTLNTFRILRSS  
YSYFAVLKHLYNKS-

>TcasOR61

MGDYDFRAAFAFEKAIFSLSGYYQRQAGFSSLIICAIASLITIAQFLSMVMQIIVAGNDLTVL  
SETLLFFMTHFTYMCKLVNLLFYKSKLLHIEDLLSRPRFYGFSQNELTIKDGIEATNTVANL  
FRIFCVLACIAYGLVPYLDHTKAMALPLPGWLPYDTTKYYYPTYFFQMVAVSITASVNSTI  
DILTWKLITIASVQFDILKRKLDLDYKLETTSLQIQFKTCVKHHKEIVNYVKNVEKTFSK  
GIFIQFFASVIVICFAGFLIITPVLSMQFLYLTLYFMCMISQVAIYCWYGHYVMTSDEIGQD  
FYMSNWEYSDVAFRKDIIFMERVKKPVTFTAGNFITLSLVTLTRILRSSYSYVAVLQHLYNE  
V-

>TcasOR63

MGFMIQDYDLRNAFSLERKLMVVGFPYKRDNKHEILYWLSAFFNLLISYGQLTTMIIQM  
VFDRSDLKLTESLLYFFTHFTFLCKLLNFQYYSKDLIEIENFLTDPIFYGYSFEQLDIKAKI  
RSCAFISNAFRICCTFTCSFYCLVPFIDESRKKILPLPGWFPYDTTNYYYSTFFVQSLSLFISA  
YCNTAIDILTWKLITLASAQFEILKENLTKIDYEGGFNETKGALVRCITHHAKIVNYTERVE  
AIFSKGIFLQLFGSVIVICTTGFQLIVVPIPSVQFAVLGTYLCGMITQVATYCYYGHEVMTTS  
DAIGMSLYLSNWEYASHVKIRKIVMIFLEKTKKPTIVKAGNFITLSLATLTQILRSAYSYFAVL  
QRLYKDS-

>TcasOR64

MMSDEYVKDVFIANRWMLRCAGLWTPSTRSKLVQIPYKIYAIVVFLFVNVYFTSTEFSLF  
YTHKNLYNFIKVNFFLTHFMGAVKVFVFFKGHVLRDLMRTLESPEFHYEPCEGFQPLI  
WRKYRRIGFKYSLGFLALAHMTLSSSYIPPLTKLPYFSWMPFSYSTPRSYLLALGYQAGP  
MFSYAYSIVGMDTLFMNIMNFIAAHLVILQGAFASSKMRVLDPGQMNNEMKRNCRHLQTI  
LRVSEDLERVHRYLTLGQLTATLFICTSLYLSTTPASSKQFYAELVYMVAMGFQLYLYCW  
FGNEVTLMASEIPVNVWKADWYDCDQSFKKSMIFTMTRMQKPIYMTVGKFAPLTLQTFV

YILRTSYSIFAVIKNTSI-

>TcasOR65

MTATKSLKEIPPIYLRVHLLTVLQILGIDILPVESVPQNLFYTYTALIISTMCLFTIAEFLDMVL  
NYEDIYRLTFGLCYCVTHVLGTVKMFLMLYLRRKKLWGNLTTLEEGIFKPNPTRGGPEELQI  
VNDAITMCNRQGYVFYTLVFLIIGARLLYASLANWPYDKHNYFDGNVTVIVNTKEMPYTT  
WMPFDYNDSPLYETIFAFQIFSTTVYGFYIGAADAVICGFMMLIKAQFLIVKRELETLIERA  
QKAAIAENPDNEDNFGREIERIELLDKRTQDYVAKYANECVYHHQELIALCDHAEEDFCY  
LMLLQFISSLLIVCFQLFQVSTLSPDSVEFFSMVCYLLLMLFQLLCYCWHGNEVQIVSGEL  
SRYAFGINWIIMRESPKKTLLLLMMRAQRPCYFTAGKFSLLSLQTFMTIVRGAGSYFMFLR  
QMNI-

>TcasOR66

MSKNLKEIPPVYLKVHLLTVLQILGIDILPNERIPQTLFYTYSVLLIATMVVFTTAECLDLVLN  
YEDIYKLTFLGCCCVTHVLGAAKMFLMLYLRRKKLWGYFTTLENGIFKPNPCRGGAEEFEI  
VTSAINMCKRQGYVFYVLTGVGTGGQGLYAALANLPYDKHNYFDGNVTVVVNTKQMP  
YATWTPFDYNDSPLYEIMFAFQIFSTTLYGFYIGAADAVICGFLMLIKAQFLIVKRELETLVE  
RAQRAGNPDRGDFGGGINRIEMDDGTQVFVEKCANECVYHHQELIALCEHAEEDFCYL  
MLLQFISSLLIVCFQLFQLSTLSPGTFFFFSMACFLFILFQLLCYCWHGNEVQFVSGELSR  
YAFSINWIIMRESPKKTLLLLMMRAQRPCYFTAGKFSLLSLQTFMTVVRGAGSYFMFLKQ  
MNT-

>TcasOR67

MDFTIRDFDLRNSFSLERKLLLVLGFYPIRDKEKHRILHQLSAFLNLLLYYGQLLTHIQMVI  
DRNDLSKLT DSTLYFLTLFTFLCKLFNFQYYGKDLIEVEKSLTDPIFYGYSFHKLQIIKAKVR  
SCTLVCLAFRISCTCSCFIYSVVPFIDRSGQKTL SIPGWFPYDTAKHFYITFFLQSLSLFISAH  
CNSATDTLPCKLISLATAQFELLKDNLR TIDYENSFEETKHALVKCITHHRKIVNYTKRVETI  
FSKGIFLQLFASVLVICTTGFQLVIVPFGSLKFAIHGIYLCAMTAQIAIYCYGHVDMITSDEI  
GTSLYMSN WYASHIKIRKIMVIFLEKTKKPTIVLAGNFITLSLVTLTQILRSAYSYFAVLRRL  
YADD-

>TcasOR72

MAKLEYLTGATFTLKCAVLYPIDSNNPKIKKILYAVWAIFILTFVTGFIQCFVFCINPFDLV  
QEAMIIMS L V FYSTTFFYFIVFYKNWQNMVALVTNINKNFHRATDNVIEKISMDQASELSD  
KLAYVWTSSLA VGSVVPVVLAIATGNLEMPMPAWFPYDYNKSPVFEITYLWQVFCLITLAI  
IYGASDMFFPCITIIIGQQFKILASNFKNNFYTSLIKLGAESIVQNFSDIKTHEFRSFYIKY  
GNIFKILNNAKFQTLNRAFLKRNKHHKLLLRFCEDLNKILNTFLLIRVSAIVFNLI FIGFNIII  
NADFLWTL Y ECPWYLCDVTYQKMLILVQMRVKRMVSTKAGNFFTMIAPSFIAFQRAVFS  
YITLLKEVTDLGKD-

>TcasOR73FIX

MTRKHIFLNFTVTILKLSFLWPSNDNYDQWRLVKDASLIVSLMPCALPILAHFVLQITGDV  
YNMV TITENLIALICIIGMIYMTICFVKNRKLVKTLVKNLPAFTKYSKTTDIILTDKKNLYT  
KIFV FYGVIGNVVY MIMPYL NIEKCQQRQNDVPCGLVTRCWFPFKFDYSPVFEIVFVHQ  
FYTCLMVS V IILDLTMLICGFLMHITNQLKHLRGFIKRFDCSSQKIAEDVIYCVKFHTAITY  
SEKTNEAFGTMMMLHITLTSLVISALGFEILVDNFNDSL RFTLHLLGWLVL LLL LICYYGQL  
LIDESIAVAEDIYYVPWHLAPVDVQKDIYMILMRSQKPLTLNAANIGVMSFPTFLRVISSAY  
SYFTLLLNIKS-

>TcasOR76

MMESTVTRLKRMYLWPTASVTSRKPFFLITFSCFLLYGSVMHLIVNDISMEEVHVIETTA  
GQFGVLYYLTFTIYRKGILEIYADLSNFTKFGKPYNFDKRNKQLNQWSRWFSVVLYFFVI  
SVFAWPGIFTQSCEDLNVALNKTEVCGVWVSPVWLPFRFDYKPMKQFVYFWQSFCCLYSN  
GGAGTISFAMSETIEHLILRVEDLKILFPKIVAERSPEVRRKMLAKWVDYHLWLLSIGKLM  
NDTYRYSFSVIVLCAGTLFGCIGYTMKNASTNFNSSIFFGWMESVVICVCGQRLMDA  
FHSVGTTVYNSEWCDDVDFQKGVILITIRAQKPVRIYAGPFSYVSHLLILTVFQTSYSYIN  
LLNASS-

>TcasOR77

MKYILMKKTIAFLSVTGFWPKTKESTKTRAFILFSSSFLFGSLGYLIVYRKFGSDDIDSIE  
TATSHFGVLYFMFFWILKRDGLVHIVNLLSDFSKFGEPFFNDRNRQLDYLLQYCFVLSVA  
TGGVFLCPIIFVKNCEMVKQEKNLTKVCGLVSNVWAPFDYSEYPMKRVVSLWESYCCFIN  
FGCGGIMSFTMIKTMEHLHIRVEQLKDMFPDVVNEKNLAVRKQKLEKWKYHLHLYDIG  
ELMNNTYRYCLSVIVLCVILFGCIGISTMQPGSSHNSLFLFMGWQFQSIICLMVGQRLLD  
VFLSVGVMAYDSAWYEKDVDFQKAVLMIMIRARRPVLIYAGPFTNLSHLLILGVLQTSYS  
YINLLNAK-

>TcasOR78

MGHAIMTEILTYLTLMGFWRSPKSSKASAFLIILSTSFLFFGILFYLVNRRQFGSSEIDSJETI  
TSQFGVLYYLILFTWKRNDIVEIVELLSDFSKFGKPPFFDQRSTRNLNYRLSCIVLILIVANIVV  
AALPVIYIDSCHKANEQLNLTCTGLIAPVWLPFDYNEYPRKHLVFAWEVYCCVMNYVG  
SGIGALTMVGTMEHVIRIEQLKYIFPKILDQPNPIREQMLKNWVRYHLALFEIGRLMND  
AYKWSLSVIVLCVGFALFACIGISMLQSTASQINSICLFFGWFPFIAFLCMWQRLDSSLSV  
GTAVYSSRWYDMDVAFQKSVLMILIRSQKPIRISVGPFTHLSMLLLLGVFQSAYSYINLLNA  
TS-

>TcasOR79

MGHVIMNEILTYVTLGLWPRSRKSTKTISYLIILSSSFLFFGSLLYLVVHRKFGSNEIDSJET  
VTSQFAVLYYMTFFTLKREGTVRIIDQMSDFSKFGKPPFFDQRNRRLNYLLSYFVLCFVAI  
VGVVALPAIYTGSKHANEQLNLTCTGLVAPVWLPFDYNGYPLKFLVFAWEGYCCIIYA  
CSGISSLVLVGTMEHLIRIEQLKLMFPEILNEANRHIREQKLNWVQYHLALFGIGKLMTA  
TYTYCLSVIVLCVILFGCIGVSTMQSASSNNSVFLFLGWQFSLIVLSVCGQRLIDTCLSVG  
IAVYNSRWYDMDVSFQKSVLMILIRSQKPIIYAGPFSYLSHLLILSVLQTAYSYINLLSARG  
-

>TcasOR80

MGHVIMNEILTYLTLGLWPRSRKSTKTVAYLIISSSFLFFGSFLYLIHRKFGSNEIDSJET  
VTSQFGILYYWVLFLLKREGTVEIVERLSDFSKFGKPPFFDQRNRRLNYLLSYFVLVLMVA  
IGGVVALPVVYIDSCHKANERLNLTCTGLIAPVWLPFDYNEYPRKNFVFAWEVYCCIMT  
YACCGIAALVLVGTMEHLIRFEQLKLMFPEILDEPDRHTRQQKLNWIEYHLTLFDIGKL  
MTSNYTYCLSVIVLCVILFGCIGVSTMQSASSHNSVFLFFGWQFQSIGVLCIWGQRLDTC  
LSVGIAYSSRWYDMDVSFQKSVLMILIRSQKPIIYAGPFSYLSHLLILSVLQTAYSYINLL  
GAKG-

>TcasOR84

MTEEKELRLCLWSCYYLKLMLWPLKREEFKSSKGLYLRLLVFVIISGSTFTAMIFMHLK  
SLKVGSYDVSEDLAILASNIGYVLMMTMYVSRQKDLELLLLDLSDFKTYGKPPNFDKVR  
KRMDLYAHLIFFYSMFGSFVYNMDKIILIDKCKEARRINEVCGSAIPFWTPFETEDLFTLTL  
VITYVLINIFVVVKVAMTVSVQVLEISSHINLRIEQLKIFIAGCFDRDFKASRERLDFCIRYH

NVIIDFSERFSRCFSYVMFIHLAITGIIIGCLENQIVQEHQPEAMLHMGGWSTATFIACYGGQ  
LLMDASTSIADDEFYNCPWYEADV KMRKDLILILRAQKALFVSTGPFNVLSFALFVSIMKL  
SYSIFTVLS-

>TcasOR86

MALNQEDAICSKSCFYLRYSFLWPPEAPTRSFYAKFILVLILSFLTAFLPLFIHFLILVERGLD  
PSEDLFVIISYTGFEALIMIIYVIHVKKTSYLIVQLSDFEKFVKPRGFDYWDKKFRLISSGVYY  
YVLIASSGLNLGRWVGMAECKERDFQVCGIVIPYWLPWKVDSWLFILLDLYVLKMTL  
VVNCALFLIIIQILEITTHLKLRLIDHLKEMLVKCFDSDSQTNRKQLVNCIRYHTYIINCSKLF  
KKCFTHAMFSLIVTMALSCGCLESQVVKFDLWALPPISAWIFILFIACMAGQILMNASLSIG  
DAGYHSKWYQTDANFRKYLILVLMRSHKALVLSAGPFNILCFELFVAIMKFSYSVFMLLN  
QN-

>TcasOR87

MKHVIMDELLIFLTLGLWPRTPTSPKIISYLMYIYSTSFLFFGSSIYLILHRKFGSDEIDTIEIIT  
SQFGVLYYLLLVVVRDGTIKIVNLLSDFSKFGKPPFLDQSRRLNLLLRLFVTVLLAATVA  
IVSVPVVFINSCKNLQNLQNLATKICGLAAPVWLPFDYTNPRKYFVSAMEIYCATMNYAG  
SGSGAFLVIGTMEHLVIRIEHLKKNMFPEILNEPKQIREKRLKKWIEYHLSIFEIGELMNETY  
KWPLSVIVLCVILFGCIGVSTMQSVSFQNSSVFLFFGWFQSIFVLCFWGQRLLDSDSLSIRK  
AVYNSKWHEMDVSFQKSVLMILRSERPVLHAGPFSYLSNLLVLGVLQTAYSINLLNAR  
S-

>TcasOR88

MTEEKQLRICLSSCFKWSFMWPTKSEEFRTSKGLYFRLLAFVIISGLTFTAMIVMHLKLS  
VEAGDYDISEDIAILATNTGYILMMLLYIIRQKDLESLLVDLSSFKKYQKPPKFDEVNRKLE  
WCTRMVFGYCVFGSVFYNLVKILAI PSCCKSRRINEVCGVAIPYWVWFDTENWSIKLPLIL  
HTFLVIIIIVDKVTLLVSLQVLEIACNIKLRDLQNLNMLVSCFDGDVEASRRRLNECIKYHKE  
IISYSEIFSKCFSIEMFTHLTTTGIIICGLENQVVQEHPEAILHIGGWITAFVSSFGGQILIDS  
SLSVAEAAAYSSAWYEADVSLRKDLILVILRAQKALFVSTGPFNVLSFALFVSIMKMSYSILTI  
LQ-

>TcasOR89

MKEAVLQQSKKEMHLLNLWPKGHVKHFRFRYVITLIIVSPFTLGLTLTHFINVLKENLDVDL  
SGDISVIAVVTGLHFMLITFVWGHKKIAYLWENLGPHEYFGKPDNFEKRCCKQLNFYSRLYA  
YYCYLGLTVYIIMKNRGGIECRRLNVERNLTICGLVTTFWAPFDIDFFPFRQILFVDQVFAT  
YFIVKGGAAISFTTLEVGEYIILKIKHLKRLVKEVFDDPREEVQRKKLVFCIKYHQYIISIQE  
LYDGRYKHCNGCYILMVGIIIASLSNEIMKNHNIEALLHLVGVVFSFYICCFSGQSLLSESL  
TIPDAAFESKWYEAPVYMQKDLLMMLRSQKPLMLHATPIGVMSLSLFLITLVKTSYSYFT  
LLNQST-

>TcasOR90

MAKDTSPVLRESIEVMKYLLQWPQNERTNLRRRYFIVIFLCSPLHLGLATHLVVCLKDNLD  
VDLSANIAVLSAVTGLTYMLIVFVWSQDKLVHLLAKLDTHEIFGTPDNLTKRSRRLNFYAK  
LYSYCYFGIVYISLVQIIEMPQCRKMNEEKGLSEICGMIVPFWAPFDIDWFPLKQIFWLNQ  
LLGIYIIKGGAAVSITTFEVAQYICLKIKHLNRLLEAFDDPCDVVVEQKLLHCIRYQQHIIR  
TNELFNVCFKHCNGCYVVMVGIIIASLLNQILKEKSVGALVHFAGWICSFFICCHAGQAVIS  
ESLTIPEAALDSHWYEAPVKYKKVLLLLLVRSQKAFNLQATPIGIMSFDLFIALLKTSYSYF  
TLLHKST-

>TcasOR92

MKNQEIKICRATLTVLKYSLIWPSEADEMNPWKWYYIRVVTFILFTCPWVLSVFMHLIVSIR  
NNADIHLSEDAVMVAFTGVYYMTIIVVKKQPKVAFLLRDLSYFQFGKPPGFDETERILGF  
LSKLTFCYSVMAVVIYNYIKYRQKPECERMNKLKGLKENCGLTPTWWPFEINYSPAFLQ  
IFLYIFTSTQVMMKLSLMISFNVLEMAHHILRINHLKTMILESLDEQDYEASKRKIKTCILY  
HLEILGFAERMDDCFNSGMFAHLTITAICGCLEKQFVDGDNQLGSLHIFGWILALFLAC  
LGGQHNLINASETISDAIWSSKWYDADLRLRKDLIFMMARSQVGLYLVNCGGFGILSYALFLS  
VIKMSYSILAMLTS-

>TcasOR93

MTNLEIKICRATLKILKYSLIWPNEADEMNPWKWYYIRVATFLLITSLWVLSVFMHIVMSII  
HDADVHLSEEVAFCVAFCLYMTIIVVKNQPKVALLLRDLSKFQFGKPPGFEEKERILG  
FLSQFFFYCVMAVMVYNLVKLLQKPDCEKMNEIKGLKENCGLTPTWLPFDINYFPAFH  
LTFLYVFISTQILMKLALIISFNALEMAYHVILRIDHLKIMITECLDQRNYEVSRRKLKTCILY  
HLEILSLSNRLNDCFSNIMFAHLTITAICGCLEKQFVDGDNRLGALLHVCWISALFVACI  
GGQHLLNASLIPDAIWSSKWYEADVRIRKDLLFMMAKSQVGLHLNVGSFGVLSFSVFFS  
VLKMSYSILAMLTS-

>TcasOR94

MAIKICKFTRKNMQISLIWPREFEINPGKWYYIRIVIFLITYGVFPFCTFLHAVVVIHNNLDI  
RISEDIGAVVSNIGISYMAIIVVQQNQIAYLLKDLSDFKDFGKPPFFEEENKRLNFWISICTF  
IYPTCGASLYNLSKILEKSECNKINEENGLPATCGFIFPIWVPFNINYFPLFHIMLISTWFCTT  
MFVRLHLSISYNAFEIAHHILRIKHLNGMIITCFDCQDYKISRQKFTTCVLYYKQILDLSNR  
LNQSFSSIMFVHFTMTSAVCGCLEKQFVDGEYVGGFIHLVGVIIISLFIASVGGQDLVNASQ  
SISEAIWSSKWYLADIRLKKDVLFMLMRSQKDLHMSVGSFGVLSYAFFVSVLKMSYSILA  
MLTS-

>TcasOR95FIX

MVVKESEIKVSRVTRKILQYSLIWPKEGDEINPGKWYYIRIFTFLSFTSLWCIAICMHFIIVL  
KDKIDWDVTEEIAIIAIYGTYYMVLAYVKNQKKAARILRDLSNFERFGVPPGFEEEEKRL  
KVYIIGIFIYAFLTITFYNFFKLSQKGACERFNEEHLDENCGLLSPVWIPFKVDRFPQFELV  
FLYLFTCCHELLMKLPLVVSYNALMVMHHILRINHLKIMITECFDEPEYEISRRKLTQCILYH  
IEILEFATRVDDCFNSCMFAHLTLTGAICACLEKQIVAGISRFGAILHFIGWILALFIGCLGGQ  
HFINASDTIPESIWASKWYNANLRLRKDLLMMMRQRDLHITAGPFGVVSALFLSVLK  
MSYSILCVLTS-

>TcasOR97

MNNQKIQISNMTRKVLRYSLWPKTNEELNPGIEYQFSVLGFFLVTVGLVLCITIRFFITIKA  
VHEVDAEVLAILIASYGSYMICAHKLNQHKVALLMRDLSVFNNFGKPPNFDKRNNQLN  
FVAKLLALYSFLATIFYNGEQLINKTECKRINKEKGLSDHYCGLLAPCWLPFEIDYFPVFHL  
ILYAFSTGYLLIKMAIHISYNAFEIVSNIVLRIEHLKAMILETFENRNKQVCHKKFLQCILYH  
IEILDFAARLDDSFNSMFGHLALTGGICACLEKQIVSGVNVVAGTLHFIGWILALFIGCVA  
GQYLINASEILPSAIWTAKWYDADLELKKKVLFMLARSQKSLFIRAGPFGILCYPLFVTVL  
KTSYSILCMLTS-

>TcasOR98FIX

MVKKESEIKISRVTRKLLQYSLLWPTEGEELNPGKWYFRIFAFLSFTSLWCIAICMHFIFV  
MKDKPDWDPTEEIAIIAIYGTYYIVLAYVKNQRKAAGILRDLSNFDKFGVPPGFEEEEQRL  
RVYIICVFIYGFITITFYNFYKMSQKKSCERFNIENLHENCGLLSPVWIPFRIDKFPYELVF  
LYLLTCHELLMKLPLIVSYNALEMVMHHILRINHLKIMITECFDDPDYEISRRKLTQCILYHT

EILEFATRVDDCFSNCFMFAHLTLTGTICACLEKQIVAGFSRFGAILHFFGWILALFIACLGQG  
QFINASDTIPEALWASKWYNADLRLRGDLLLLMMRSQRDLHITAGPFGVVSYALFVSVLK  
ASYSILCVLTS-

>TcasOR100

MSPKDKIKICGITRKYVLRYSLLWPVENDELSPGIRYKLTILAFFSITGILVFSISVYSVLEIKQG  
YDIDVEDVAILIAVYGTYMVSAYLNNQHQIALLERDLSQFYKFGKPPGFEQLNSQLNFAV  
KVLIIYSFLGTFVYNGTKMLLREECKKNSQEKGLSDNHCGLIATFMFPFRVDYFPVFYIVL  
VITFLLAHTLIKLCMHISFNAYEIVNHIVLRIEHLKEMILSCFNERNQTIVQKKLRVCILYHIE  
ILDMAARLDKNFFNTMFGHFALTGAICACLEKQIVLGVNIVAGTLHFHIGWIIALFVGCVAG  
QCLLNASEIIPNALWAAKWYHADLRTQKTLLFMLARSQKELTIKAGPFGILCFPLFVSVLK  
TSYSILCMLTS-

>TcasOR102

MQNQSKPCQLDMMDETYLQFFVKSFTYLNMLPEKTTTCTTIQQYYVSVIITITTFPILADL  
VSQFYEESISFTSVNENFVALSALFAVIYVSVCFINRKHKIRALIADLALFETFSSKAVITETD  
KSVKFYTKLFIVYGIVGNLCYGLLPILGYKKCHESKSVHMTRYGIPCGLVVRFLFPFKFDY  
SPLAELVALYEILVCILGTSVVIVVTTLICGVLIHITVQLQCLRKIILDLSQVNDLEILEHKMK  
FCVKYHTAILDYGIRTDLAFNQMMLLHITWTGFIISVLGFEISTDDYVEAFRFFMHLLGW  
LGMLFVVCYYGQKILDESLAIADAVYTFWLWYKKSIVVQRYVLLILLRSQKPLTLRACGVK  
VMSLATFLGVLYSAYSFYFTLLLKLP-

>TcasOR103

MKQALKLADVLGFNPLKNDNLTKLKKYSSLICMISVVVSAILEFVSNFSALETYESAPESL  
VPQFQTLAKISSLLLSQKDITELIDEIKYFWKLDQFGDFHTRKLLKIYKYVTIFFYFYTLML  
SGACVLFITTTVIFTPEKPLFLCYGGLHGLPSPQFEIYFVVDLAAIVIMSGVAAYDGIFFYF  
AFHVYAEFKLVKVAFKGKSTFIEAVKHHDFLLKYLRKLNIEYSPIFLCQFFSNLLGICFCLF  
MLSRSGMPPELTSFSKYFISLVAFTVQTYIFCLIGDLVSELSLDISNVIFYVDWLDDEVYKSK  
TARLVIMNKAQSPVKTIGKFTGMDLRTFLLIVRNAYSFLAFVNNALD-

>TcasOR105

MKPALKLANVGLDPLRNDNYTQLKMMFCALCIVSLFVSAYLEFFSNFTTFETYETAPESL  
IPHFQTMFKMYSLIFSRTEIVELIQMAEQFYKFSQCORDERKCLKLYKRVDLFFYVYASLVAA  
ACVLFIVTLIFKPGKPIFLCYGGLHGLSPFEIYLVVDLIGIVIISVTPAFDGLFFYFALYI  
YTEFKLLKIAFKTMSGQELREAVKHHDFLLKYIKLNSVYSPIFLYQFFCNLLAICFCLFML  
SRSGIPPEMVSFSKYFLCLLAFLVQSYTFCSIGDLITELSEDVSNAIFYTDWLDDEAYENKT  
ARLIIMSRAQNPVMLTIGKFANMNLRTFILIVRNAYSFLAFVNHALN-

>TcasOR106

MESALKLIDIIGLHPLKSDKYSTMRTISFLSLVVILISAQLEFLSHLSVFEVYNSGPHSTIPP  
LQSLLKMATLHFYKNELIDLMEKSKSFWKLDKFGDLYKQELSKLHRLVTIIVYIYIALLTAT  
CVQLAVLTLIFRRGKPIFLCYGGLYGLSPHYEYISILDAIGIGVISIAVSGYDAMFFFFALDI  
YTEFKMIKSAFKRHSQTVSSYNKQFIEAVKHHDFLLQYINQVNDIFSPMFLQFFSGLLGI  
CFSLFMISRGLQDINTLSIYSAGLLGFTAQSYTFCLVGEVISELSEDISNEIFYTDWLDDEV  
YRNKTAILVMNRAQESPKLTIGKFADMNLRTFIMIVRNAYSFLAFINNALD-

>TcasOR107

MENPLKLLHIIGLDPRQSDKYSTIKKVISFLIVLAVLLSALIEFFLHHNESQVYDTAPQSTVP  
NLQALLKMFALIYKKEIDLFTKGNHFWKLDKFGDCHKQKLTCLHXYVDLFFYVYAVIIT  
GAFLQLALLILIFEPGKPIFLCYGGLYGLSPQFEFYAVLDFLAIGVIAISVTAYDSIFFYFALY

IYTEFKMIKIAFKRENCAQFIEAVKHHDFLLQYISKVNEVFSVIFLTQFFSGLLGICFNLFMIS  
TQGTRDMKSFSTYFVGLVGYTAQSFTFCLIGELISELSEDISNEIFYTDWLDDEVYRNTTAR  
LIVMNRAQESPKLTIGKFADMNLRTFIILRNAYSFLAFINEVLD-

>TcasOR108

MGSILLNSVLKMEKALKLVNIGLDPRKNDTFSKFRSIFCFTILISASFSSHLEFFLNFKG  
LETCEAAESIIPQYQTMCKMATFLLYKTEMLDLIKKSERFWKLDREFGDLQAKNLHSTYPI  
FQIFFYVYVILFLTCAMFALVNWIFDTGKPISLCYGESEGLETPWVEFYIVLQSVVEVTIIFL  
GITGYDMVFLYAGSVCIQFQMLKMAFAERKMNERQFLKAVKHHEFFLLQYVEQLGDIYS  
MWFLQYFSSFLGICFGLFLISKEGLPTEPERLSKYFPYIFSFTMQSFTFCMTGTMUSDWSS  
EISDEIFHSDWSDDQVYKNKTARLIVMNRAQRPAKISIGKFLDLNLRSFILLMRSVFSFLAF  
VNNILNRIN-

>TcasOR109

MGKVKFTEPLEFLNVVGLNPENCSNFSLFRRVISLGFLLVITLGLLELLHFEGLTCSRA  
SEAMIVQYQLFIKIAVLLKHRKNLVVLMQKTRKFWPLDKFGQDAKIERPHKLLKAFFAY  
KLIMILMALQYILRKFSKNGKPLAIAFGESKGLSPKVDHLYFVLHSTSTFVVLHAVTGFD  
RLFFFLIGHVTELKLVKKSRYRLTQNRREKFLQVQHHAFALEFVRKLNRIYSQVLLNQHL  
SCLFGICFGLFLVSKDGIIPDLGHVTKYVPYVISFITQTFTEFCFIGSLLITWSLQVPDAIFYND  
WGKNQAYKYKTDKIIAMIRGQRAAKLTLGGFGDLDESFNLVVKNAFSFFTFVNAMNQK  
-

>TcasOR110

MDKVEFSDPLFFLNIVGMHPFKADKFSKFRSLAFSIAVYFAVIFSGVLELIVNSQGLETYARA  
SDTLIPQCQLVCKIFVLAKYKKQIARLLNGSQRFDLGGQFGARYGNSFGKTHKYLSFFL  
LYKVMLTFTCLQFLAVKIIFKIPKPIAISFGETKGLEPLYDHLVYLVHAMITLVTLNIVNGFDG  
LFFYFIGHVTELKMKVAVAFGDSPINETNWSEEKRFKFAVRHHRFVLDIEQFNIVYCTMLLV  
QHLTCLFGICFGVFLMTKDGVPDDLDRASKYLPYIVTFIFQTFTEFCFAGNLLSWSLEIPNEI  
FYHDWAKKTTYENKLAKIISMKRGQRAARLTLGGFANLDDLSFRMVLKNALSFFTFVNA  
MMNKKAVTSV-

>TcasOR111

MEKVRLEPLFLLHIVGMSPHDSGTFARIRKIFSILVYTSTVVLSMAELFFNYKDLETVIRAT  
ESFFTQYGLAWKIAVYVYKTELAQIIRLCDNLWPLDEFGTGHNQFLHKLRRFFLLYTG  
NLALLCTQFAVTAFFDDQFKSVMVYYGEKESRSQIYDNFVFTLQVIYLYVGCFFVAGFDC  
FFFYLLGHAVTELKMLTISFSCKEIGRNWGYEERFKCSVKHHIHVLELLDKINKVYSVMLL  
NQHLCSLFGICFGIFLMTKDGIPPNDHFSKYSTYIFTFILQVWTYCFAGDQIMHWSLKIPD  
EIFYDNYWNKYSLKNGLNKIIAIQRGQKAAGVSLGGFAMLDIESFNVVIKNAVNFMMFMD  
KMYKRE-

>TcasOR112

MITRLMAQFAIKGRVGTGGYIMDKVKLAQPLAHLNIIGLDPLKNDRFSKIRTVITVAVFALC  
NVFSSELFLHYNNPHVIVRSSEVVPFFQNDWKIAIMLVYKKNLAQLIQNTSRFWQIDAF  
GKNYQYSMGIKHKYVRIFYLVYRLMLMFSCSYILLTIGSDRPMILSFGETGGLGSGALLF  
YLIFHIVYLLIIFNVINGFDGLFFFLVAHVLSLQMVKVAFSSSKVITFWNHKRRFKSAIQHH  
RFVLDYINRLNSIYISILLNQHISCLFGICFGLYLFISDGFPPDYEHISKYVPYVIYYITQVWV  
FCFAGQLIIDWSVNISDEIFYHDWTLNRTYENKTDKLIQRAQHAARLSLAGYGNLQLQSF  
NLVLKNGLSFFTFVNAVIHK-

>TcasOR159

MRGKTIESTTNPYSSLKKVFIDFAYSKLVISYTKASLTFHVLSLLEVYYLVTNFSVELICRY  
GMMCLMTYMYSKKLLLEKPCLLDFWKVYNSSTATQRLISEKSSKTNRRLYCALTCCFF  
LAILFPWIWGDLEFFIFSQVYEKYFTSWAPAFCYFYVSTLLWCCFYCFHLPGIIMYLTLHLD  
LQFKLIKDKITEIDKNCSQKEIYQILRLCISHHVALKKWMDKLDLVTIMPPFFLFGALNSI  
ATSFFVLYTLQNTTMILKIRLGTTLTLCNFIIVSTFAEVGQIFSGQNNSLFEQLMDCSWYLWNI  
KNRKTLLMFMLNCMKPKTFSWGGITLNYSFVLFILKTSLSYASVLFKLRGETF-

>TcasOR160

MSGKTKRITTKTIHLSNPYSSFKKVFSDFAYSKIMIFYTIATLAFHMLSFLQIYYVATNYSV  
ELICRYGPMMLAIYVVTAKVVGVFYKFTFMLENQCFLVWKT CNSSPTTQRLILNKSL  
KMNQKLHLALMSYFLLAIVMLPTWGDLELFFIFSQVYERYFKFWAPVLYYFYISTFLWCS  
YYSFHLPGCILYLTLLLDVQIKLINDKITEIDQNFSQNEISETLRLCISHHIALKRWMSTLAK  
MVNSVMPVFLVLLGALSTVAVSFFVLNTLQNTTMILKIRLAILTVCNFVIVSTFAELGQIFSD  
QNNSLFEHLIDCPWYLWNVKNRKTLLMFMANCMKPKTFSWGGITLDYSFAISILKTSFSYA  
LILFKLRGETIRN-

>TcasOR164

MSGKTKRTTTRKINLANPYSSLKKVFIDFAYSKIMMFYTKATLAFHVLSLLELYYVATN  
FSVDLICRYGCMICLMTYVVTAKVVGIMFSKPFKLEKQCLFVFWKTYNSGPTTQRLILD  
DSLKMNRLYLALMFYLLAIVLLPVWGDLEIFIFNQVYETYFKFWAPVLYYFYISTFLW  
CCYYSFHLPGSIFYLTLHLDLQIRLINDKITEIDQNFCQNEISETLRMCISHHIALKSWMSKL  
AKLVDVAVMPVFLVLLGALSTVAVSFFVLNTLENTSLILKIRLTTLTVCNFVIVSTFAELGQIFS  
NQNNTVFEHLMNCPWYLWNTNRKTLLMFMLNCMKPKTFSWGGITLDYRFALTILKTSF  
SYALVLYQLRGETN-

>TcasOR165

MSDNTKKATTKSLDLTNPYSSLKKVFINFAYSKIMIVYTSATLIFHILSLMLEIYYLATNFSV  
ELICRYGMMCLITYMVTAKFFGMLFSNQKFLEEQCLDFWKAFNSGPTTQRLILKESSK  
MNRKIHLALTFYVILAIIMLPWEDVNDFFMFSQVYENYFANWAPVLYYFYISTFVWCSYY  
SFHFAGVIMYLTLLLDLQFRLINDKITEIDQNSTQNEICGTLRLCISHHIALKRWMNKLANS  
VDTAMPVFILLGALSTIAVSFFVLNTLQSTSILKIRLATITVCNLIVVATFAELGQIFSDQNN  
SLEHLMDSPWYLWDVENRKTLLMFMANCMKPKTFSWGGITLDYSFALSIFKTSFSYALV  
LYQLRGNTF-

>TcasOR167

MAKTGDIFPVRDPVKRCLFIPKLLLESTNFWPEKRNFLTGFANWVMLIICVLIESGQIAFVV  
VNIKDITKIASAMSTVSTTFQAITKLTVLYIYNDKLRLLILKSVWYEFWPSYTAGREINTKLE  
TYNKIVIVSFLTILISGICFAFGFLSSPLISGERILPFETVYPFDWTKSPYIEIYVTEWMTNIA  
FILIGICGHDFLMGLCSNVVGQFTLLRELFYLGTKNVAQIIKKGHDTNIEPNRQLLRICI  
IHHVRVTEICKEIAEIFSFCFIQLLSSVTALCVGALIMTFADIDAALFTVSSAYIVGHLLQLF  
LYATLGNEVIYYASRLPNAIFHSHWYNIDLEVKKDILFVLQRAQKEVKISAMGVSVDLYQT  
FIQVLRLSFSFYTMLSKVTDH-

>TcasOR171

MVKLFLLLKHLTMKAQSDNPYIVLRRVFDFAFTSHMIIYTKITFVHFLLTLLLETYYMIT  
NFNVELFSRYGMMCLMTYSNVQIVLAKLLEILFARHIKFLLEEERLSHFWKLEESSEETQK  
VVNAESSKIRKKTFFVLSWFVALGFVLFPIFGDLNDFMFRVYRNYFGSWAIIPCIVYST  
FPSIAYNSICLPAVVSYFIFHLNLQISLINDKLGKISEKSRQSEIYQKLCSCVAHHVRLRRWT  
NIFQNELESALPFYFLGAINSIASFFILYNLQNMTLIFEIRLVVISVCNVLILWIFAEAGQEF



SDNSDSIFDAVVACPWYSWNAQNRKIMLIFMLNCLKPMTFWSGGVKLDYQFTVTIVKMS  
YSYALVLYNWRYEK-

>TcasOR172

MSFQALKHLLKMCAEKTPDLNPNYLTLRRVFDIFPYSKSMKIHTCITLLFHFLSLILEIHYL  
VTNFSFELSSRYGCMMLMTYVISVKIFVIMFAKPLKILEEQRELHFWKIGDSSHAMQOSV  
ATEALQVKKQTYFALSFCVLLAVILYPVWGHVNDLFMFSQVYEKYFGDWSVIPYYFYVFT  
FMSSSFNSFQLPGVILYFTLHLNLQISLINEKITKISGENYCQDEVFKQLRDCISYHVALERW  
MARLIDLTKTAMPVFILLGALSSIAVSFFVLYSLENTRFILKIRLTVVAICNVLIVATFAKAGQ  
RFSDKTGLIFDAIATCPWYSWNVPNRKIVLIFMANCLKPKTFWSWAGITLNYQFAIKIVRTSC  
SYALVLYKLRNGNY-

>TcasOR187

MSTKREVVKNFPPYYLFFKICIDFGYSNVVKRLNICCITMIVMFHLTQIHVMQENFSKELIL  
KYGSGIALGIYTILSMSVQMLIEHEIKDLIAEALFSMWAVDSCGPQVEKLILRRAKVMNIY  
CSIFAWFALMATVMLPMWGDHSEWLLYDPILVEDVKTRLKIIYYLSTFIIFPMIAFSAIRLPG  
ILLYGILQIHMQIMLINHKLQVQVSEDLDDLNNVKKIDQDDYQERIYKELCLCVEHHIKIKL  
WLNKLMKIVQLLMPYFLLGSINAIYLLFFVYNDTSNILKVRCLLIVGGQILCMFAEAG  
QALGEETGRIFDTLVNCPWYLNKKNKQALTIFLSNSFQPYTIAFAGFTLNYSLALALLRS  
SVSYALVLYNMRN-

>TcasOR188

MFVKRQVLEGFPYYLLQLCLDVGYSKMMKIANIFCIINLLNVLAQIGYIKQNF GKELL  
RYACGIQLTIYTIVTMLFEFLVEQNVKMLMDEALSEMWPIDFCGLEIKKILKRSTVMNSIF  
YFMFAWFALIAIVMLPMWGDQSEWLLYDRICKEFFATWWKIPYYFYFTTFPVVAFSGIRLP  
GLLLYTIQTHMQIILINQKLVQISGGLDGINDVRMIDQKNYQKRIYKGLRLCVAHHVAIKR  
WLQKPKIVQSLMPIYIIMGSTIFISLLFATVYSFRDSSNILKVRMSVVLMICCLILCMGAEA  
GQALSNETSRVFDTLVNCPWHLWDQKNKKALTIFLPNTLQPVTTITLAGITLNYSFVGLLK  
SSASALVLYNMRN-

>TcasOR189

MEKMFPQIRTEDMKKFPYYLLKICIVFGYSKIVKLLNVVCIITSSSTIVLQVYYLKQNF SK  
ELILKYGCGISLTIYTIASMLVEFLIEQKTKKLLNEAGTILWPVNFCGVKVEKLILKRVTVM  
NIIYYFMSAWFALMGIIMLPWGDHSEWLLCDVISNEYFETRWKILYFACSCFSFPVIAFSSI  
RLPVILLCTILQTHMQIILINQKLNQISEQMGNLNNIKLVDDKCYQKRIFEDLRLCVSHHGK  
IKKWLNVKLVKLVQSIMPLYIILGCLNFISLLFFASDGLQNASNILKARLCVVLIVCCLVLSMF  
AEAGQALSDETSGVFDTLTCPWYLDKNNKKVLSIFLSNSFQPDSISVAGITLNYDFAVA  
LLKTSSSYALVLYNMKN-

>TcasOR190

MSTKKQDLLKHFPPYYLWVFINFGYSKLTCLVTISCIHSSSLFVEIYYIYCNYNKEIIFKY  
GCMMSLLGYITISMVVELLEKDTNNLVCEARSLFWTIDSCGVQAQQIHKRAVVMNATF  
GFILMWVATLGVIMFPIWGDQSEWVLCVKIFENYFENWSQMANFVFFSTFPMVAYSTIRLP  
AMLLYGILQTHMQIFLINQKITEISRSKDQEKIYKELCLCVSHHVEIKRWLQRFLKMOVLT  
MLMLIPLGVLSCVCLFFVIYSFLDTSNILKMRLTVVACTVLIVYIFAEAGQDFSEDEISCIF  
DTLVTCPWYFWDQKNKKALVFLANSLKPYTLIAKITLNYDFAVALVRTSVSYALVLYN  
MKN-

>TcasOR191

MRLEIEALKNFPPYYLLKICIDFGYSKIVKCNVVCIIINSSTLFIQVYYVQQHFNKELIFKY

GCGMALTIIYTIASISVEFLIEKNAKNLVNDATAFVWPVDFCGEKVKKLILKRATVMNKICY  
FMSAWFALMGIIMLPVWGDHSEWLLCDLLSKEYFETRWKILYFACSCFSFPVAFSSIRIPG  
ILLCTILQTHMQIILINQKLNQISEQMGNLNNIKLVDDKCYQKRIFEDLRLCVSHHGKIKKW  
LNKFLKLVQSIMPLYIILGCLNFISLLFFASDGLQNASNILKARLCVVLIVCCLVLSMFAEAG  
QALSDETSQVFDTLTTPWYLDKNNKVLISIFLSNSFQPDSISVAGITLNYDFAVALLKTS  
SSYALVLYNMKN-

>TcasOR192

MVSEQTLLKNFPYLLRIFIDFGYLKITKVLVACIIHSLSTLLEIFYICQNFSELVVFQYG  
CITSLATYVITSMTTGFIENDAKNLIRETVTAFWPIDFCGPQVEQLIFKRVARINTFNFFLLA  
WFAIFGIIMFPVWGDSEWMLCVIAFKKYFPKWWRVVYVFFATYPMVAYS AIRIPAMLL  
YGILQINMQFFLISQKIIQISQKPQNKTHQPGFYQKTVYKCLKQCISQHAIEIKRWLQRFLK  
MVKSVMVVFIFVGGLCFMSILFFVVYTFQSTSNILKVR LGVILMICNLILVTFAQAGQTVID  
ESSGIFDTLMTCPWYLDWDEKNKKTLLVIFFSNSLKPITFSIASITLNYFAVALLKTSASYAIFL  
YNIKN-

>TcasOR193

MSELEKQLPYYFLMQFCINFFYSKTVKVVVTSSCIIIQSLSLLLQVYFIITNFSKELILKYGCE  
MSLATYLLTSLLDVVVENTTKQLISEGHTSFWSIDSCGHDVKNHIIANSARLSVVIYFILA  
WFAVLGISVLPVWGDQSEWILFVQIFNTWKKILCYVYLSTLAVMVFLSIRLPAMLLYGILQI  
HVQIILINQR IIQIGRENTNDIRMMNQMSYQNRIYKELGFCVSQHARIKRWLKLLGIVQS  
AMPIFTVLGGLIFISVLLFVLYSFENASCFLKIRLGMVVISCSLVLCMFAVAGQAFSDETSRV  
FDTLMTCPWYLDWQKNKTILLIFLSNSLQPINFSIANITLNYFAVALLKTSTSYALILYNMK  
N-

>TcasOR194FIX

MAMKQYPFLYKIFLDFAYAKIGKMVTYSCIIIQSLALQLQVYFIVTHFSKELIVKYGPGVLV  
VTYLVTSLVVELMIENKTRKIIDFARLTFWPTDFCGLEAKNRLIKNSSKVSIVIYLILMWFA  
AQGIVMFPVWGDQSEWRLHVEIFDQWKLFFYYIVSTFTIIVFSVRLPGILLYSIFQTHMQI  
VLINQKITQISQNDPNDIRMMNQTYQKRIYKEMCLCVSQHIAIKRFIKLLEIVRPVQPIF  
MVLGLLGVISIFFALYNLENTSNILKIRLVMVVISCILILCLFAEAGQAVSDETSRVFDTLT  
CPWYLDWQRNKALAIFLSLSLQPISFSMAGFTLNYGFGISMLRNSASYALILYKMKN-

>TcasOR195

MFRERVYDDR FIVLKTIFLEFAYCKEMKIYNMFLV FHLFSFSLQVHFIVLNFSVELITRYG  
CMLTVFLYLIAAKSFSIIIKQVRMLEMEATSFFWPIDCCGPQVKKNYDRAARQNIQNYFT  
LAWFALFGIIMLPVWGDQSEWFLCIQVFQQYFGCWKLFYFYFSTFPMIAFTAFRLPALML  
YGILHEHLQLILVNQKIVQLSVRRSLKENIVDNANYQKTVLKKLKCISHHVKLRDLSGKL  
IGVIQLAMPVFLFIGALGSI AVL YFVLYIFLSSNILKIRLVVITICNGLIVYTFSAAGQALADE  
TGRVFDLMTCPWNTWNIKNR KVLLIVMSNTIQPLTFTLAGITLDYKFGLTMLRISCSYALI  
LYNLH-

>TcasOR197

MFKKRKFD DRFIVFKKIFFEFAYS KEMKIYNMICLVFHSFSFVLQVYFIVQNFVELITRYG  
CILAVFLYLIAAMSFAIFIEKQVKMLEVETTSFFWPIDCCGPQVKKLIYDRSARINILNYFTL  
AWFTLFGIIMLPVWGDQSEWFLCIQVFQQYFGSCWKLFFYFYFSTCPMIAFTAFRLPGLM  
LYGILHIDLQLVLIYQKIAQLSARRIFSENIVDNAHYQKTVFRKCLKCISHHVKLTCLRKL  
ELIQMAMPVFIFVGA VCSIAVLFFLLYVFSSSHILKIRLAISVVS NVLIVYTFSAAGQAI  
ADE TSHVFDLMTCPWNAWNNKNR KVLLIIMSNTLRPLTFTLAGITLNYKFGLT MIRISYTYALI

LYNLN-

>TcasOR198

MPNVTNKRQKRLFSKTRTKSEDPFVMIKDVFDGGYHPVTKMLNYICLVIHSCSLLLELN  
YFVHNYHFDLMMKYCCAMSLMGYIATMLFAIFQEHS AIDLTKDILSLFWPIDYCGPRVKE  
EIVKKATKINRIHYIVLLFAGALGITMFPWGDQKEWFLCVQVYQHYFGKWSKIPYYVYFF  
TYPMLAFSSVRLPFMTMYAIVQIRMQVYLLHQHISEISGEYVYDMKNLQILCDQNYQNEI  
YDKMRLIISHHIMLKRWMRKLVTQISMPVFLVLLGTMTSISVLFYAIYSFHNINFILKVRL  
ISVSVCTVLVVYMFSEAGQALSTETTGVFDLLMTCWPYVWNINRRILLIFMANSLEPMT  
FSLAGVTLDYRFALGMLRTSCSYSLILYKLTGI-

>TcasOR204FIX

MTNFFSNFCSPLKNHWAKTKHLFSKFLSSDQPFIMIKLVCVDIGYHPVAKTINYICLAIHIS  
SFLLEMNYLRLNFSTDLIKYGC GISAVVYDISTLIVAPMIERPTIGLSEGITTSFWPIDFCGP  
KVKQLILEDTKKTSKIYYRTLVTIFGFAAVIMLPWGDQKEWFLCVQVYEHYFGKWAQIPY  
HIYFLSFMWFAFTSVRLPLMMSYAIKNIRVQVFLVNQKIAKMSKEYEAKIEDVNYQNRV  
YKNLRLCISHHVLKWWLRKLQKIVRFCLPVFVIGILTESSVVFYLIYNFKVNLKIRF  
LLLACTTGVIYFFSEAGQSLYIETSQVFDLSLPCWYSWNVKNRKLVLIFLTLNQLPMFFSL  
VGFTIDYRFALTMIRTSFSYAILYNLSSGSQIASI-

>TcasOR205

MTNIFSNFSLYFKNTWTKTKQRFSKTLPSNVPFMMIKLVFVDIGYHPVSKIINYICLAIYM  
SSFLLEMNFLRLRFSTHLLIKYGCSSLSVYFISSMTVAAMTELLAVDLSEGILSSFWPIDFC  
GPQVKQLILKQSRADKRMHYVLLVFSITGLAMLPIWGDQKEWFLCVQVYEFYNGEWS  
KIPYYIYFFTFPWVAFSSRLPFMMNYAILNLRMQVFLINQKIAKMSNAYDQTTIEDVNSQ  
KRIFKNLRLCISHHILIKWWLRKFNHVKFCIPFVIVGIATSSISVYFYLIYSFQQVNLVLKIRF  
LSIACCCWFVIYLFSEAGQSLYEYTEIFHSLISCRWYIWNVKNRILLVFLANSLEPMTFSLA  
GITLNYRFALNMMKTSCSYALILYKLNCDSQIMD-

>TcasOR213

MAKFNDPFKVFRTIIFVDMNSYKVIKTCNVLLNIYSLIHCLLIYYLCKNLEINLLIRYAPAIL  
LFILVIFGAVFSIYMDEDILEVRSVFRENRSLSVLKENSQTKLGRKCQFINIFILLVLLIVS  
TLAINAPCFGNQRELLICIQVFEEYFGEWSFIPYYFFLGFPLLYNFFRLWMTFVYGLLEG  
QLQFFILEEYLCGIYETEDSKSWKYLQDSRYQOEIEKSLRLCISHHIGLKKFLKMFVENQTL  
KVMFPYLVFGVLILICYFSFIINFADTVTTIGKIRMFMTAICMMGVAILLSWIGQQLIDVTS  
IYFTLGGAPWYYWSQKNAKLLMFLTNTCKNESVTLAGISLDFTLFVSIVHTTLSYALVLY  
NLRESSLVSSSQK-

>TcasOR229

MSARPLHLRNFPYYFLKVLVDFEQYSAGKVLVSYFCAIVHSISIFLQMHYLVKNFTKETMF  
QYGCVLTVLTYCVVALFFAIASGNFVEKLESEISSFWPLDICGEDVKAAILKRAFYTSLVA  
YITIIAFPIFSVIMFPVLGDQSDMFLCVRVFNEYFTKWSQIPISLYFYSFPVIAFSGIRLP  
GMLLYAILITHIQMFLNRRIEQISELSNQRVVFETLCSIELQAKLRLIRNVFQLVYIAMP  
IFILLGAVSSVFLFFVNSLETASYFLVLRMGCFGANVLVVFIFSQSGQSFSDETGRIFD  
TLVMCSWYNWDKRNKKVLLMFLANSLEPMSITAGITLDYKFALAMLRTSCSYALVLYQ  
MKN-

>TcasOR230

MREKPLHLSHFYYLLKIMLCDTEQYRLGRFLSYSCAVIHSISLLLQMYYLIDNFKETVS  
RYGCVVIVTTCVVALIYEILYAQPSVSMMSQQISTLWPMDACGEKVKQMILKRAFFTSV  
VTYSILFSFPIFGIIMFPLWGDQSDMFLCVRVFNEYFTKWSKVPIYLYFCSFPVLTFS  
GIRLP

MLLYAILITNIQIILLNQKIAHISDLGDQRLVFGTLCSCVSLQIKLRQMLNKVLQFVYLVMP  
VFLLLGALTAISVLFLLFYSLNPSDYL MIRLACFLGGNILVVFTFCESGQALSNDTGRIFDI  
LLTCPWYKWDKKNKNILLMFLVNSLKPMSITIAGITLDYKLA VTLIRTCCSYALVLYQMKN

-

>TcasOR234

MQQAALRNFPWHYIKRIFIDFGYHRTMKIFTIVYFILYSGSLLLDLYYLFNNFSIAAMVRYG  
CMIMLISYVIAGMLFCFIFEKQLLNLLSEAETIFWPPEMITSELPKFIHRTNVLNYFIIAWFGL  
LGVILFPVWGDQSEWFLNVWAYKAYFGSWWYIPYNLFYYSQPMAAWTCVRLPFIMMYF  
SLQIKLQIFLLNQILEIPKGHNTNSETAPDDL SYQEAVSQKMCLCISHNVKIKRWTKSFLR  
KVIQAMPVFVLLGILGSIFVTFSVLYSFESTSTILKIRLVVVVGCTILSVYMFVEGSQRLCDE  
SSQMFEMLAYSPWYLYNKNNRRILLTFMTNTLEPITITWGGIILNYNFGLTMLRMSFSYAL  
FLYNIH-

>TcasOR264

MVYLKDPFITLRVMFLNFKYKIVKCCDFSIIFYSLVFCLQIYYLISYFSANPLIRYATTILL  
VLWGIVGAILSVTLEKQILEATAFLDEMCWPLNMVRKEAQTCLERSCRIINIYITCSLLILI  
TVVFNMLCFSSQRDFFINIQIFEEYFGELSHVFNGLYFTGFPYLCYHGARLCYVFVYAILQI  
QLQFSLIEEYLLQVYEIDCLKSWRYLRDTRYQQEMGKSLRLCITHHNALKKFVKMINDMS  
LICMPFCLVLGVLLISCLAFVINFGDTLTIFVKLRILIFVV SCLCVLSVFCWVGQQLTDVSSY  
IFLTLARAPWYYWRLENIKILLTFSTNCTKNDSIVLAGIRLEYMLFVSMLRISCSYALVLFN  
LRK-

>TcasOR276

MTMQFIVKRATRGIHDLRVLKFISSDIFDIKIMKLCLFITFLIHLTACAITIHAFMFNNFSRR  
EFISCAPVLFGC FYGLLGLTILFKPSMTRTLMLELKAWDITAADDAVSSRIKFEINVITVFC  
LVNYLLALVASFFY YMSFYGDEEIFYLIRFLEDHCPNHKRVLIKLYKISFVLLGYVMV VHA  
CQVLYATQHVR FQLILCAHFMANVTKQAKNIKDEHLPDDNNYQNMIRERLKFCIIRHQEIR  
RFYFDKLEEMGNLIGGFALLGCFLGISFAMHMLTSEFLRYHFARTVSSIIAGVTTFATVIAA  
GQSVETEVDISTRV VKEVKWYTFNESNKR SYMLMLLNSMQTYKIKFSENYSINYELGLSI  
VRGVFSIVSVVVQLDY-

>TcasOR277

MDQVLEKFPENDWLRGVKFISSDIFQRKLVKAVLFMVLLVHLTASVITIRAILIKDITAKEFT  
FYGPVFFGCFY GMLAIYIILFEKNFIANLSGELKMWSFRSAGAEITRQIRFESRVVTIYAINF  
VMVVIASCLHITPLESDYETFY MIRFFEDKIPDYANVCKTSYRSTFLVMGYVMMVHVYQII  
YATQHKGKQIMLYLEYVKRVTQFNEKIGEKCLFYNESFQKMVARKLKN CVIRHNEFLKYH  
RKN TREMSHWIVAFSLCGCLLGISVFFYILSGVIYREQYFRVAVLLTTAASTFVAFIVAGQSL  
ESRVDNGYSVVSRIEWYNFSETNKKTYFLLLVMMLMQPWKIKFSDKYSINYELGLSIVRGIY  
SIISVMVNIRFDS-

>TcasOR278

MNQPQESFLKNDYLKVLKLISSDVFEPRLVRAILFVVFAVQLTASIITVRALLIKELTAKEFV  
LYGPVFFGCFY GMLAIYIIIFQSSFITNMSQELEMWSYSSGEEINRRVKFQSRVITIYALVNF  
LLAIVASYLYFSPLDSDNETFYMVRFIEEKIPDYAKICKIAYRTTFLAMGYVMIVHSYQVIY  
ASQHVRFQIIFFTEYVKKVVEFDEKISEECLFYNERFQTIVGKRLQNCVIRHIQFLKFDRIKI  
KEMSNLIAAFSLCGCLLGISISFYVLSGIFYREHFLRVALISVTAVSTFFALILAGQSMESKAN  
SAHIIMNNIKWYNFNQSNKKAYLLLLMMSMKQYKIKFSENYSINYELGLTIVRGIYSIISV  
MANMHFDN-

>TcasOR281

MDYSEKSLIQGDCLKLLKVISSDIFQPKLVKILLIVFGVHLVVDLLTLRALLVNELDFKEFI  
FYGPVFFGSFYGMMALLTLVLKDDFISNLKQEFRLWPLDCAGDEIYSQIKFENKIIKIFVVF  
NCIVTFIGSYLYFLPLSDNETFYAVRFIEENYPDHRNLLHGLYRSTFLIFGYAMTVHVYQV  
IYNSQHRLRYQIIIFTEYVASIGNPDKRKENELFYDKGFQKVYERLKFICIMRHQEFLVISNK  
KVGDMRVFIVGYSLCGCLLGISLTFYIFSGKFYREHFPRVSVACVGAVTTFWAVITAGQAIE  
SEYDSLLSTLLGKIEWYYFNDSNKKNYLIMLINLMQPWKIKFSEEYAVNYELGLAIVRAIY  
SIVSVIASMHFEA-

>TcasOR282

MHDYCFEPLTKNDYLKTVRFLCCDVFEAKIVKLGLWITFGTHLIVSVVTVRALLYDLTINE  
FVHYAPVFGVGSFYGLLALWTLFRIEMVRDVRKQFKFWTIDCAGQEAHSRIKSEIRITTVLS  
VLNFIITLYASYWYVYPIEGDKEIYYALKFFEEYCPRHKMVLVSVYRATFPLLSYAMIVQA  
YQVIYTTQHIFQAILFIEFVLNIGHQTKNLSEEKLFYD TDYQKIVGERFKFCIMRHHFIAF  
RRLKLNEMSNLIVGFSILGCLLLFSFGLFVLTGKLHREHFWRFGSLAAVCTFGSVIWAG  
QSIEIESENVVNSLNSVKWYTFDENNKRNYYIIMLVNTMQPYKLFSENFSINYSLGVSIVR  
AFFSILSVAALKLYFNHV-

>TcasOR300

MIGLTNGDYSPRPSMEGDCLKILKFFAVDIFNPKIVRFFLWIMLLYHVVFVTLVTAYFMLYVL  
SNSEIIGYTPAFLGNFYPMCLCVWSVLFISRLIYVKEDMPLWAIDTAGAKVQASIKRKIFLYT  
AFGIFNLVLSL SAGSFYLNKNSVEDVNVFLALRIFRDYFPNYYQVLDLIYRLIYFCFSYLMVA  
PSYLLIYYILHVRIQAIIFAAAYVAHIDGHSYDGTIDLDNEEFQSEVERRFKFCIKRQIEFLL  
MESKKLSQISNLIAAFSLAGCLFGISIIHFLTGTQLIQEYYFRIGLTS LAAIATFSAFIYTGQST  
EVQIELVDNAIDNLCWYNFNRSNKLLYLIKADLARVRKIKFSGQWAVNYDLGFAIVKGIY  
SIISVVVSMW-

>TcasOR309

MPFEWTIRKNKIKPILQNDVLLNLMLVPNTIISNKFLVILNYFYFGFIILQSVFVAVIIITKDE  
WKLLNGQYAGYTS GCAIVWSSYITMYTYVDKFLNLYKEIFPHLWSLDVVGGQDHFNKFSK  
MAKVLKLGKNILLVVGFLSATVGLPWYRDEYEIIITVRVYKDYVDKWTLLYFVLFSSLY  
HIALTVIFCVLCLVYMVLHLHNQCVMLNKRLEALDDEQLFLDNDNYQDFVTKELKFCIQ  
QHQLLKFARKLNDILYPTFYVLSGVVTGVSLLLFPKNDIKNLLRCVLIIVLGGGFAISF  
CFLGQILENASEELLFSAYSARWYLNINRKLKLLSVLLKTQDNIVLSSSGIITINFRLISLY  
QSIYSCLTFLLNIK-

>TcasOR311

MHHKNIQPMTDDYLKFIKIVSSDIFQLLPVKIFLAVVFLTHAVLDLLTIYFVLFVIEPHDFIT  
YISVFLGEFYAPLFAIVMMLFRGKITDSLKHKLAMWTITSTDEKTQSDIKRQIVFFNGFVVL  
NSVIISIASWFYAARLSDDVNAFFALRLIHEYFPKSIFEVIYRVTFNVLGQMMCVHVHQTLY  
YTQHINIQQVQMFKKIIRDLENESKIEQQLKFCIERHAEFIKITLTTKELRGAFVGFAGFGLL  
GVAVAFYIFSGLLTPEYYLRVGAIGLASVNVFAVTIWFQSTESHLDLMLAVGEVQWYNF  
SQRNKKVYLILLMNMVKGKRWVSEEYSVNYRLGLAIVRGVYSIISVTSSYKKS-

>TcasOR313

MEQLPKNDPLLVLRLVPELLLLHKIVRHFVVFIVCYLTATTIFCLYVLATVRGLWDLFWSQ  
YSLTFGSVIGFSCYFVAFWKGFLELRRRVFADYWALTSLGEESFQIKKLSKSANIFTV  
GTILASIATSSTCMPWVGDEYDIMFPVRVYTDYFGERAVPLLVPFYLAMYCTGFVMIATGF  
IFVHFALHLKFQFFLLNRRLDGLQTEPLVNDFSYQNRVKEELTCCIEYHQKLLKVAKEMNE

IVYYPIFIVVSSGIICSVCLIFYMKTENSIVRGTAMASISGGLITFGFGFTGQLMENESGRLFD  
TSVMLPWHLWCLSNRKLYHIFLTKSQYHVSFSSSGIINLNHTLFISLYRKVTSIFSFLMNVSN  
KNST-

>TcasOR314

MEQLPKNDPLLVLRALPEILMQHKIKEYVVLFIICYMTVTMILCSYVLATVRGLWDLFWSQ  
YSLAFGSSIGFSCYFVAFWKGSEFIKLRRRVFANYWPLTSLGEESFQKIKKLSIFANVFMV  
ATILASLATSTAGLPWVGDEYDIMFPVRVYTDYFGERAVPLLVPFYLAMICTGFVMISTGF  
IFVHFALHLKFQFFLLNKRLDGLRTEPLVNDFLYQNHVKEELTCCIEYHQKLLKVAKEMND  
IVYYPIFIVVSCGIMFSVCLVFYMKNFKNSFVRGTTMAMTGTLTTFGFGFTGQLMENESGR  
LFDTSVMLPWHLWCLSNRKLYHIFLTKCQYHVSFSSSGIINLNHTLFISLYTKITSILSFLN  
VSKKNHTK-

>TcasOR315

MTLVRKLQAAATNAFEIRIKDDILAELFNWPFLVLDKSWSTKFAVFLTVYCVFETLACALV  
YSTLDVNMGMGYAIVIARFATTFCSSFFSFTKRKQYFEIINENFPHFWPLQSLGKSTFNRIK  
MRASSVKFYSLNVVVMLIGAVILISFTQDESEVYLSVKIYKDYVNKWTGTFVMFFYVSFI  
YIGLVAAISFVLTYTAFHLIFQCFLNQLKQINDSIVENEQKQAKFDEKYQSFIYKELISC  
VKLHQRLILFGKRINHLVYAPLLVYIFGGIVVGVVALIYYLKSSVQHIFTSLILLIALINSTTF  
VINGQMLENEAENIYISLTNLPWYSLNVQNRVVYVMLMQSQKIIHMSASGLVSLNYQLTI  
VFFRCIYTGMTFLVNVGL-

>TcasOR316

MTLMRKLQTAIRNLFEIQIKDDILAELLDWPTLVLFKSKWPKNFAIFSTIYCVFDTLVCTLVY  
STLDVEMLGKYAIFIAKSTIALCSFFSFFAKRKQYHKKIINENFPHFWQLQSMGESTFDQMK  
KIATTVKFYSCLSVVAMLIGAVILIFTEDESEIYLSVKIYKDYVNKWTGTYIMFFYASFLYI  
GIVTAAVVFLTYIVFHLIFQCFLNQLKLNINSYIVKNGQKLVKLEERNQNFYKELISCVK  
LHQRLIYFSNQINDLLYAPIFMYTFSGIVVGVVALIYFLKTSIQYILTSLVLSIVSLIITTFVING  
QLEDETENIISLTNLPWYSLNVQNRVVYVMLMQSQKIIHMSASGIVSLNYQLTIVLFR  
IYTAMTFLVNMGL-

>TcasOR322

MTFHWITTPLEPILKDDPLFVLMALPNKLIGSKLQALVNYFFFVYMVILPVSCFLVIVATNQ  
WQIFYSYSGYASGVFVWSCYVSFFIFGSKYRRVYRDVPHLWSLDVAGEEHHNRLKKGIG  
KQLRTFKLVLITLAFIGATSGLPWFGDDYDFYIPIKLIVDYCDQWKLFFSIFFYLSFYHIGVT  
VLSCFFSLMFLVLHLQNQFYLLKTRLQTFATDSGTSDVFLSMKVKDEEYNRSVTQEIVFCI  
RHHQSVLMYCDRLNDLLYLPIFYFTLSFIVTGVSVILFPKYDLQALIRSLFVIVLGMCMTLL  
FCSLGQLIENESENVLYSLIEAPWYLNWNTNRRLYYLLKAQDTVNLSSSGLITINFQLILT  
LYRGIYSALTFFLNFS-

>TcasOR328

MSYNIKLTKDDRLKLLKIMASDVFSKTVKIILIVVFLVHAIANSITTYFALHVSDTKQFISY  
ASVFFSEFYPMILAITIIFKGEVVQHLLTDDINIWTIDGASKKLQSEIKLKIKILTAFFVIINSFSV  
VIGGFCFVQQLSDDVNLFAIRLIRDYFPNHSTILEFFYRMTYPICAYLMAVHAYQCLYYTQ  
HINFQLQMFTEIITELTDLKTISLPENRLFYNKQYQTVIEQRLKFCIKRSQEFIKVCVTKNKE  
IGSLIPGFAICGLFLGIGITFFLSTGKFTTEYYLRMGVTSICGLTTFALIWSAQTETMINDL  
VMVINKVSWYNFNQSNKKLYLTFLLNTMKERKIKFTEKYSVNYQLGLAIVRGIYSVISVV  
ASKRHH-

>TcasOR329

MNCENQFAKDDYLKTLKIMASEVFQSKAVKVILIFVFLVHAIANLLTIYFVLYVSDTKLFV  
NYASVFFSEFYPM LAILTVIFKQIVQHLTDEFKIWAIDSASKKLQSEIKLKIKIITAFVITNSL  
IAVWGGFLYVQPLSEDENLYFALSFIHQYFPNQSSSTLEFFYRMTYPILGYLMTVHAYQCLY  
YTQHINFQLRMFTEVVAEFAPVKRFLLEHHLFYNNKYYQTEIEQRLKFCIKRSQEFVQICVI  
KNSEIGSFIPEFAICGLLFGIGVTFFLSTGKFTSEYYLRMGVTSFGGVMTFSALIWSGQTTET  
MTSELVKALNEVRWYNFNQSNKKLYLTLVMNIMKERKIKFTENYSMNYRLGLAIVRNIYS  
VISVVVSKRRH-

>TcasOR330

MNYKKQFAKDDRLKTLKLMASDVVFQSKTVKIILT VVFLVHFIANS LTIYFVLYVFETKLFIN  
YASVFFSEFYPM LAILTIIFKGDVVQNL TDEITFWTIDSASKNLQHEIKLKIKFLTA FVIINSFT  
VVMGFSFSYVQQLSDDVNLFLAIRLIRDYFPNYSTILEFFYRMTYPICGYLMAVHAYQCLYY  
TQHINFQLQMFTEVITELNNSKTSSLLENHLFYNNRTYQTNTEQRLKFCIKRSQEFIKICVTK  
NKEIGSLIPGFAICGLFLGIGITFFLSTGTFTTEYYLRMGVTSICGATTFSAIWSAQTTETMT  
SDLVMVINEVNWYNFNQTNKKLYLTLF LNM TMKERKIKFTENYSVNYQLGLAIVRGIYSVI  
SJVASKRQH-

>TcasOR331

MNFFQKKLAKGDFFKTLKFIASDVVFQSKAVKMVLILLFLIHAIYLLTIYFLLYVLEPKQFV  
NYATVFFAEFYPM LAILTVILKGIENLTDEIKIWA IENASKNLQSEINLKIKIITTFVIVNTLI  
AVSGGFLYMHPLPEDVNLFFALRLIRDYFPNHYSLEFFYRMSFPIFAYLMTTHANQFLYYT  
QHINFQIKMFREVCLEVKAWKTVSPFENHLFYNNKYYQTEIEQRLKFCIKRSQEFVKISVYK  
NKEIASFIPGFAICGLLGVGLVFFLSNGKITWEYYLRMGFTSLGGVTTFLALVWTGQTTE  
NITSDIERAINEIRWYNFNQSNKKMYLILVMNTMRERKIKFTEKYSVNYRLGLAIVRGIYS  
VISVVLSKYQH-

>TcasOR332

MEFGNYKLMTDDYLKTIKFMSSDIFQPIPVKILLGFIFALHS AVNLVTAYYMLTTFD AKLFI  
NYSSVFFGDFYPLLATFALISKNN TVRNLD ELETWIDSAGEKLRSEIKLKIKFLNIFVVCN  
SLLVLVTGLTFIQPLPKDSDIFFAYRLIHEHFPKHGQALEFLYRTTYVLISYIVAVQPFQIFY  
CQHINFQLQISIE TLKKISDWKTLSE DGENLIDNVKYQTEIKRRLKFCIQRSQNFICLHTEKI  
KEVSTFIAGFAVCACLLGIGVIFYLISGNFTPEYYVRMGFTSVVGIIIFAATI WAGQSTESAID  
EMVTS LNEVEWYNFDQSNKKLYLIFLINS MRERTIKFTENYSFN YQLGLAIVRGIYSVISIV  
L-

>TcasOR333

MEFEVKT F MTRDY LKVVKFLASDIFLAKPMKILLLLIFIVQASVQAMTGYFMATAFNAKF  
FN NYAPIFFGTFFPLLAISILLKKNKIFHNLKNELKIWSLDNAGEKIHSGITTEIKVVTYFVIV  
NSVFLLANSTLAYPLSQDVNVFFGCYLIHKYILTYGRTFEFFYKATYLVIGHTNTGHVYQ  
LLYYTQHINYQLQLYIEFIKFLDEGKTISKNEDDL FNNPTYQTLINQRLTFLIKRGQEIVKFHI  
KKTNEIRTLIPAFS VCTCTMGIGV VFFIISDNFIREYYFRMGMSLVTVSTFAAGIWSGQSM  
ETNLNEITTALNEVKWYNFNKSNRKLYLIFLTTSMRERKIKITENYSLNYQLGLTIVRGIYS  
VISVIINMK-

>TcasOR334

MDHPDIKPM TDDSLKLRFIASDILQPLPVKIFLGVIFLFFTVGSNLLMIYFVLYVYDIREFM  
DYAPVLFASFYSGVAILS AIFKGIHTLPDDISLWALDSGGEKIHSEIRFKARMVTIFVICNT  
LLIIGGILNLIPLSDDLHVYFALRFIHEYFPNHKTCLILLKASIFPVIPHMLVHAYQILYYT  
QHSNFQIQLFNKVIAEVDWFETPLRETEL FYSKPYQKGIKLLKFCIQRLQVLINAYIVKTK





YLATASSTILILLALYKTNRFTEFLNFKAFYRNRNLDVDHLEKWNRKQKMATVIIVLCVI  
KFSTLIYTDLIGEYSTPCRGYFTEYLFYTNLFMCNARYLFEFSTACVVLHLVSEQLDYIAIS  
MDCTMFLYIDISKKNIMSSAKKRKLYFDIFKQFEKWTDAYMNVKRSANLCDTVFAQL  
AIMITTTITLYIILLYGITSFNIERGKFSVVKSLSYLISLFGFLIALLLLSKAGQRIQKSAENLR  
RKLSKFLHLSLEDPEFHRAATNLLRLVCTHHIKMRCFGFIDIDMTLLPSCLMFVTSYTVIAL  
QFNNAV-

>BmorGR13

MEDSFNRLLSIRNMIIFQNVCGFYHMCTEKLYISRIIKMYCVALAIVLSVFCFQNPDITYLS  
WDVWVWTFGYTLNVIICLRYNGNYFFQYWNLHEIDIKMNLTSIDKEKVPISRAVFTVFLI  
LRSTAFAMTIFVFGYLETGILSNTIISIYSINLTFYRNMSNIPMILMFETFYVRILKEQLCS  
ELSTVLGCNNDARQLKLILKYLRNYSLSVRHLMDTTLPFKILILVILVGSFLRSLIGYAFV  
YNSDQIILLSLPVMFSTKILSEVVEIKLICTEKLLKNKNEGLVLLDLDLSDKPTFLTSKACGEQ  
LQDALSFLNRSYSYTLQVIEFDCSLAFVFTSFCITHLIVVVQFTHVLD-

>BmorGR14

MNLHKNIPIRNNLFANKVTAIALPKTSLVLFKLIHIFLLDLGVYEEKTFKIKCIVKFLTISG  
SLTISVVCFSFMVSNLSEHTFVGWYGGFISTYIFVVLFFNLSNRMTFVEFYKTLRFDANYG  
IDSNEYKFNFKIIFVNILFIANRMVLSFVYCSYYPQNCIRPRYAQILFMLPWLTLDVLLTTNM  
FLFYATYCRIA KFPMLIKNSMNIVALRNSYKLIVDSLEKTQTSFDIVFIIALVFSVPEIMMSIY  
STLLEVISKHFLEVASILSLNYVAIAQSLLLTLAPSLCAGVLPWKTNNIKILHEKLFTEKDK  
ASAREIELFIKYIESRPLKLRACNLVPLDFSLTIIVLNICVTVYLVIIQFTHLY-

>BmorGR15

MISSSDINHCRNKVFAYNVPGIALSKTTLVLFKLLHYVLLLDVGIYEEKTFKNCIVKFLTI  
ATGVSVSIVYFCLIA TVLRKN AFFYWFYVLFISQYMIIVFIFTL SNGMSFTDYKMLLRFDA  
KYQINSNNYFNIKILVHISILNRIGMAIYCSYTKNCYEMSFSQIIFVLPWLTRDVILIMN  
VFLFYVTYCRITKFPALLENKTVGSLRNSYKLIVDSLEKTQKPFDFVFTISLVFNIPEIMLSI  
YFTLLQVIHSHFLEVAPTLSISYFSITHSVVLILAPSLCAGVLPWKTNNTIKIVLHDKLFLEKD  
KNSARNIKLFIKYIEARPLKLRACNLVPLDFSLPVIVLNL CVTYLVIVVQFSHLS-

>BmorGR16

MIMNLTTDRISKRNKVFAYNVPEVTLPTTLKVLFKLIQFTLSLDFGVYKYKTFKMKCVAK  
VLTLAGCLAASAACVSLIISNIFENQLFFGWYTLFVCQYTIVIFMFTFSNGMTFIDYKMMLL  
RFDKAYQIDSNVYHFNKIVLVVISVTSRLFLCAVYCIYSTENCIKPWYNQLLFFPWLSLD  
IVLIMNMFLFYATYCRLAKFPSLFENPKNVVPLRNSYKLIVDSLEKTKKSFDVLAALIFNI  
PEIMMSIYYTLFQVMNKHQEVAPVLSLSYFTIILSVLLILAPSLCAGVLPWKTRHMRLLIL  
EKLFAEKDKNSAREIELFIKYIEARPLQLRACNLVPLDFNLPVIVLNL CITYLVIIQFTHLF-

>BmorGR17

MGFSLGTTALSMFFFEPVVFTIIQITMIIVKPAKYKLSDFRPKDTSKLSSEIIMYFKLFHIF  
LGIDLGGFRYQNRQVKYAVRLISLIQPLAIYGLCIYALLKIIANTEFLWYTISFTEYVAMSVAI  
TLFSNEMTYCNFMINKFIDTKLKIGDESRIGVKLISSTILIGVTRCFTTTTTYCLLGFCAP  
TAAQILFQIPWLTIDLMLLQYMFIFYACYCRLVKILRILKKRNTDIEEMRRIYKTLVDVDR  
ARAPFDLAYLLGLLFSIPDVLYSIYESIIVKGEINTAKALSMSIYITNIQSLALMFAPALTAGF  
LPSLTMKMRILHDKLLEEQDKKTYRHIVLFIKYIETCPLKLCACQIIPDFSPHILNIVVTVY  
LIVAIQLTHFL-

>BmorGR18

MRRSTKVISMVNQSDKGEIKTCSRFMKIYFFVIYILTGFNFGFYTGRLNFLRVIQASVLLL

RFIIASNCIYIAFHFRLLLEAIWYSLTFSESLAIVVCFMLSRALSCKNLFEYLYSVDQELKKS  
VGPSIEVKLALYTVVVSVLRLTVYVFCIAIYYETLHEGFCVELVYNTPCYCSPLYLVIHFTI  
FHSVYCRLKALRISMNEKFDVYKGTLIYKSLIDNLEEIKKSLDVPFFVILLNAVAIAMINILV  
TLEISYGQTMKFIRTPRYLETVLLFSSAFAPVLAADMMASEAQKIKVTLNINILQRDDSSL  
EDDRRKVKQFAGYVSARPFRLRACRVLSLDCTLPVTVLSICVTYLIVVVQFTHLY-

>BmorGR22-like

MNRHDHRFSIYNPKRNEAMWKRELFVNNEGKDIKDFQIKDIYGPEITDKDGGALLDKHDSF  
YLNTKSLLVLFQIMGVMPIMRVPKSIRTTYNWISKATLWAYLVWGLECIIVVKVGQERLAN  
FQIGSNKRFDDEVYNIIFLSILIPHFLPIASWRHGPQVAIFKNMWTYQLKYLKITGKPIVFP  
NLYILTWGLCIFSWSVLSFAVVLSQHLYLQDDFELWHSFAYYHIIAMLDGFCSLWYINCNAFG  
TASRGLAINLHKALEAEHPALKLAQYRHLWVDLSHMMQQLGRAYSNMYGIYCMVIFFTT  
TISLYGALSEILEHGLSYKEMGLFVIVAYCMTLLFIICNEAYHASRKVGHFQDRLLNVNLG  
AIDRSTQREVEMFLVAIAKNPPIMNLDGFTNINRELFANISFMSTYLIVLMQFKLTLRQG  
ARKTVTAIVRAIFNTTITDNGAGGSDEDQE-

>BmorGR26

MNKTKIYRKKLDKNERLVCSVQAMFARLIVGLYDIIKVSNRVKWMIKSYCISLSSFICYL  
IIFRDDNFSLHPKLTSMMEYITYVTFSFLTCDKYLFRYLRFNPRTDGYPIFLYLCKKFEKFFKI  
IICLFVSFKILGVVMMQSWPILSTPKYIWGTLALHFLWLASHMGRLVFILVYGILFCRMRT  
IRIIFENRGFQNTQPQNLTPKRYILMYEAVLNSIESVDFPVKFLIFTFICCFAPKLVVSLFEIME  
EMKKGELSLTTFIWFVLSVSPSYLFLLSAIALDLVSEDVQELLSITIDRRLNCKNEKERSEI  
QEFFFYLRNPNFYTLWQVVSLLNRLTLVATSFSIANVIAIMQIKNSKI-

>BmorGR27

MVFKYKIMTKAPKSLPVLKILMLFRLVFGNYFRLSSNRYINFLVKSVCSTFTILLSVMCGK  
RLKNDSPYMLSLTEYILNKILNYATSEGYIFKYCNSIKTCDKIMGFKKLPITIDVFIAIITVIT  
RTAITIYFGFLFPFDKYQVVLYVGCIVFSNDLNSLTIMNVFGLLNRMNLLRKSLEAMTVPI  
NIIGKNEVAPKVRLVRNAFRYYSNLLDNLDSVNHCVQYSLSVTLLLKFPKAVLLCYDSIKT  
YFVKIDNNFAMDIVDPTTEILSIVVMSFPAMLCEMITNEVEKIKAILTKHLIQCSDNSLRFEL  
NITLLYICHRPFKYILWRAIPLDTSVPIGIVSLIITYVIVLIQLLHFST-

>BmorGR29

MYLRSKKSRFKLFSFERMIKILLMICGHYVQTDSSNVVSSIHRIFSIVITICLCPYFQFNPF  
HVIESVWYSILSQFTQYGGFFRYCSTIKTFDLLSGFKQIPLYTKRVCFFLLITLLVRLIIVLIHF  
SAHQTKLKTFC AFLIILSANTGHILMTIMFSILNTRMTLIQKLFANNPIPVNIVGKNQNASHI  
KRVKGLICYNNLLD TLKVAEKEIQFTLT VTYLCHVPTIICYVYFVITVIYKSKFSGYNLIPM  
LDMILACMAVTAPALFAELTKNTVDKIKKILGSQLLRCSDESLRYELEITLEYVIQRPFSFSI  
WRAVSLDASLPVAMTSLCITYVIVILQLTQLRP-

>BmorGR30

MYLRSKKSRFKLFSFERMIKILLMICGHYVQTDSSNVVSSIHRIFSIVITICLCPYFQFNPF  
HVIESVLYSILSQFTQYGGFFRYCSTIKTFDLLSGFKQIPLYTKRVCFFLLITLLVRLIIVLIHF  
AHQTKLKTFC AFLIILSANTGHILMTIMFSILNTRMTLIQKLFANNPIPVNIVGKNQNASHIK  
RVRKGLICYNNLLD TLKVAEKEIQFTLT VTYLCHVPKIICYVYFVITVIYKSKFSGYNLPLF  
DMILACMAVTAPAVFAELTKNTVDKIKKILGSQLLRCSDESLRYELEITLEYVIQRPFSFSIW  
RAVSLDASLPVAMTSLCITYVIVILQLTQLRP-

>BmorGR33

MCYTNFVSRQVSKCIHFFSTIRYIYLRMFCGLYINCSSSFKIRCIARLYCFIYCLNLHYS

YIFTTNVSLTNFFHTFIILAEVSVHILFSLYTGESNFISFCIEMNKLTSDPNEFIATKCVTTHFIA  
YLVIVSHILSSTLICGARASCFTFSVILTSMTFLTLLSRFTTIIMFDVWVIRMRSRKRILVNA  
LESDLAENKAKSIESFLNAYKQIIASTRITKLATRNLVIFNFVSMFGRIMTLIYFCINNPGYL  
DTYHMSLWIFGILLAGFVTCAPPVLVEMNVNELDEIKYALADQLVDYTDNRYRTAIYNAL  
DYVEVHSIRYTLWKNFPMDLTMFFGFAGFCATYIIGLLQFTY-

>BmorGR45

MKSPEYLSKDILDEDFVRVFSFPFLVQMALGSCRVHLKARFITVPTLGQKLYTVMCIICSL  
MYFNMTKLYLPLYYEHSIVYYIFVTVTGLDQLSFFANLIHLRFLNGETNTAFYIMMQRIDR  
NMKIDHNNIFNKTVTLANILTITLILHYVGLVISTIILKEYSLLSLFGLLYGQLMLMVMEMAL  
CSNLIIFFFMRVRFVNAIKNHVHPENQNQPPKLVRYFITNRITRYLAAQTHDFIVNDTDVY  
LKQIFEGFSMFIDIYRFQVCPLCIKLVLTLLNFEFCLVAIQRNVLGPNHIGNYYIIVNSVMG  
FFTALYVSGRCELFFREIRETKRLSVAVLLQYQEGPLREKATRMLKIIESTPQFSIYDMWQ  
MDGYTFVKICSLVTNLIVTLLQFAYL-

>BmorGR46

PFLVQMALGSCRVHLKARFITIPTLGQKLYTVMSIICSLLYFNITKLYLPLYYQHSIVYYLFL  
AVTGLDQLSFFANLIHVRFLNGETNTAFICIMMQRIDRNMKIDHNNILNKTVIRANIFTITFII  
LIYVVLVISTIMLNEYSLVTLFGLLYGQLIFMVERAHCSNLILFFFTRVRFVNAIKNHVHPE  
NQNQPPKLVRYFVTNRITRYLAAQTHDFIVNDTDVYKQIFEGFSMFTDIYRFQVCLFCIKI  
VVLSELLTFELCFVAVQRNLETKNLNTY-

>BmorGR47

MKIRFLFGFYCDFPNKRFQNILKFYCVLVVLLIGSWACSTGFRSDKKIVYCEYIAYFLIS  
LSTKDRYIFDYKQQLIDGSTTSKVLYKKLERLLKYFVTITIVLKMLNIFVFCGWNLTKEI  
NELDGVLFINLLWIGLLLARLSLPVIYGLLYFRLRVLRMTLESKGFNSPQNRFTPCKYITIY  
EKIMKDLLKMDYPLKYVFIIFLIGSVPKLLQNSWQFLNSLKNYGPEISKILEFTLECLHSYIV  
IILPIVVALDLSEDEIKMKIITLNKRLACLNERQKMEIQQLFLLKNNSLRYNLWRVVPVN  
LKSVLIFLSF-

>BmorGR50

MAGIRTISSKVKPLELPDVSENNFADDGLKIVQPFKFFIYIQAITGINRLYLLKCNKFMVLMFS  
YLYAIFLISFVALVYWTTEPKKNSHLVIRLFTFFEYTLACISVFLKMKKMMKFFENLSLLDK  
MLKINKNVNSTCCMKQVFFWVTGSIVYNLIEFYAMEFYDNTNKGLKTIICTYAIALAHDC  
EQIFFFTLQRVVYLRLVVKRHIQEYFKVDEDSRKKPNKYEMLSNNVQLNLTALHEVYA  
LLHNCAEKLNTVMSIPVLLMLFTSGLSTTILLKFFVRVIQLTDPSNPGSAIGVCMYLIVRCIK  
YTLLVVISCYYSSITATQVSLIRITIHDAINTVPLGKLQRRKVKAFYLMTKEYSFVYALAGVI  
KLNMSLPLSYISLCTTYLVIIIQFSKFLD-

>BmorGR51

MAMGIRTILSKVKPLELPDVSENNFADDGLKIVQRFKFFIYIQVLTGINRLYLLKCNKFMVLM  
FSYLYAIFLISFVASVYWTKEPMKNSHLVIRLFSFIEYILLICISVFLKMKKMMKFFENLSMF  
DQILKIDKNVNSTFCMKRVFFWVTGSIVYNLIEFYALEFYDNTSKGLMTIICTYTIALTHDC  
EQIFFFTLQRVVYLRLVVKRHIQEHFKVDEDSNRKKPNKYEMLSKNVQLNLTALHEVYG  
LLHNCAEKLNTKIMSIPVLLMLFTSGLTTILLRILVRVIQLADPSNPGSAIGLCVYLIVRCIKY  
TLLVVISCYYSSITATQVSLIRITINDAINTIAFGKLQRRKVKAFYLMTKEYSFVYTLAGVIK  
LNMSLPLSYISLCTTYLVIIIQFSKFFD-

>BmorGR53

MAHIKDENQSKQQKEHETLNKNKLKVVYTLKPALMLENWFGLSDFLLVNEDELVLL

MQTEKFGVILSIFVIMFAVFVDFPDTESESIMELMDEVPSMVVLSQYFIASITTSCLSAIAI  
RIFETFADLDSMLLITTTQDFYNKSRYSQTNKYLIILGVSHIISSTLDLLTDDEIVWCKFFVLP  
YFLQKLEVLTFCKLIVMIQCRLQIINKYLTFNIEEQEKNKALVFTLAESNPKKTDKFNWIGC  
PSPNNMKIRDLATMYDVIGTICSLINDLFNIQIFMTLVSTFTYIVIAIWSTLYFYRAPNFTFGT  
LTTIIWCITILSVVVMFVFCERLVSVRNNTKILVNKVMNYDLPKTMRVQAKAFMELIES  
WPLKIMVYDMFVSDISLMLKFISVATTYLIVIIQLSHFV-

>BmorGR58

MSSRRVLYRAEVLSSNNVDAHVQDMLKPLNFFQFILFFPKYTIRDGYITPNSLIRNIWSATG  
AFVFISICVFRILTMNKIAVYDTFTTMLLISKYFDVALYCIGFIVNTYVNIAYSNNVLLYLK  
LQTIKTFIPRNNEIMKNVVKWYSVILIIVLCGTLAMFSFFHLSFSYFNIFDLTDLAVFSFDLN  
LVYACSVLNFLAQLSDELNKEIWRLGNKAVTVCKDGSKPDWNGINLTYINVLDAYNYFK  
EAFRLLIFFHTFKTLTHMFIYIQSIIELCKKFYPGDDYDAITVGAVVGWVFFRNITLQCLVGV  
SCQNIFYSATSNTEICAVQVGSIVSDEHKLFLKAVRRLNNVVFYKWSMYGMFIVDATLPR  
RLIELIATYTVVFLQFAFK-

>BmorGR56

MKKIRLLRSIVFLENLLCIYRNFLFFNKKARAIILIHITIELVLYVLSIVNNSFIIYSYFHSDNR  
SMLIVFTTICCFYVVTFVSIVMGILRSEEFKDLVTSLELINKFFTNNKTYLKSLGRSNTMIIAI  
TTILYCVTCIGIAVDKITLNDFYEFSSDVIWTVSSTLLELRYQTECVVYFGIEYLFLLIFTKHL  
NLLVKEAIKKVSLDNGTVKDVPISSDAVTKNEVKRWATIYRQLMMSSKLLQACFSLQIIC  
VFVSAVINFITTAFRMVKVSVLGSIATDMNEIIVNLIFLTYQNIQGLVLIIVTGQRVWNQILL  
LNVLLARLYNGILIQPCRDTRLTKNLQRMVVKNPVQIKMLSVLPVGSYMLPMTLSVS  
YIIVMLQFGHVV-

>BmorGR57

MEEIKAIKLVTFIENCICVYRNYAMCTKRKNIISLRIIVEIIVFFVNINNILLHKKYYNGSGL  
LYIIYFLVYYINYMFCIFYGALQGKAYRQLIFCFNKINAIKRDKSYKSLARLKNMCIV  
ISIALLIISALSVDNRNSWNIYEVSLRDSLLILSKIHMDFFYHFEYVVYFTHIKIFHLTLRY  
LNSRVKMAQFEMKMTRRDVHDEGERNIRILLTKELTTEWAVLYKCLVFGTKMKSLFGLQ  
MLIAMVMSFVNFTLSLYGIIICISIEQSQTASQHNLLLILTYTATMLLIFIVAQSVYNEVEM  
LKRNLARMYNILAVDSDETQQKLVKDFLRMVYKNKVEIKMLSIFPVGMPMLTFFLSLSAS  
YVVVMVQFSNVF-

>BmorGR60

MLTPRSDLKNEKLSFSPSGKTTAADKDDTEARCQVDSSLERLLLFPNLVQHVSFIPMYSIR  
RGLVSPDGPLAYLYSLLGFCLFTSVSVYRNAIMHGTRLSSLHLFTLYSDLVSFVINYSLSLIC  
NVVNSKSNVEFVCRLQRLQTVLRRNQREQEQFARSNWAHLAVVTALYLAVVGLLNVVVL  
KQSLPDTLYLLLLFCIDVNVLYATRMLALLRCYLQLWTRKINEKAFNPVHHNMFTAYLDIL  
QEYEVYTTLFKKIITYYVLETFLHGLLYVQVAIQICKSIRRSGRFSEQLMMIVSIFTWTIKNM  
IIMTLHNVECEKFLAVEQAVAACQTQRASTTRCREEKRLYKNVCRVSRAAFSRRERGWGL  
LAAGAALTFRFMDLATTYVTVLLQFAFVSRT-

>BmorGR61

MSIRFEKDLLHNYVEIELQYFLRPFNVMSQLFFQSKYRIVDNFILPNTLTKNIMSFFVSVLC  
ALSFYIITISVWQNTATHSFHALVTSVYLSYNIYGILIGSVLIIWLSDRNIEFVLKIQDLIKILE  
FNKCFLEIYAFINSIIMAAIFILNFLLYGYFVVHLQKFALGLTFSIIVCILNQDLDIYVIFANI  
LKKCASRWTVEARQKNFNNDQGWVVKLFNAFLNLTESYQLYQKIFEFYELLRVGVIFLG  
LQLTVCRCVCSNDIKSIQCTVMLHAFQLICVWIVKKFITLSILSFEMEIFYEKLREIETVCIIIV

SSDNPSERELKIWKNIIRVSSCSVRKTTACGLCEVGAALPQWLLQATTAYTIVLLQFHITTF  
RATNDIYDLD-

>BmorGR62

MNDLFLSKIVKWTKTTKYKLDDDFQSLFRVFNIAQAMNLCPKFLIYDKYITNNAWFIHILA  
ISSFIVLVCLDSFFANFRLVLSEAMGPPFYGFYSFYFISILYENIGVIIQITMNGYLTKNNVLIIT  
KLQDTFKDFRRTDYITKSNRWTNWFIFFIYMNFIANYSYFNFYVNTFSFHKFCFAFIKMCF  
DLNIVYTIFIFKMIGDSLTMFKDTAFCSKNMKLYEVSNRVYWNKMLRLYSNILDVFEFSKR  
TLNFFIFYFVSNILLRILSHVQLAILMNSINWLQHVAYSNIVMVLTLAKEGIIIVLIAKCEK  
IYCVIGDVQTACQLALGNAACPEKRRFCKNVRSSSAAFSKIYICNILAVDAKLAVSLMSV  
TTYTIVMLQAILK-

>BmorGR63

MQIGNAVIHLKSTKLTTMNTISPPTKLLKIFALNSNIEEIDLKCSSTKLRTMTAFVLCSLIFYS  
LYYKFIYVFDYVNISIKITDCVQMVYDFCQYIVDLYFVTNYGRNISSEYFQQYKIIDKILEV  
VCYEIHKHRIVKLLWVFMCIWFSSCFDFIAWFLNYGWITPLVYSVAYIFLLIKILTTLDL  
SAHIMNVEIRLKMADLIHHYYMSCEDNFQAEETLCHKWNWLSKERAKYYELQFRIHALKQLS  
CNNNEIKLLSRCYLMLTEQVEIINRMYGFRILLNSLSLLIDMVRFTNISVRMIGSQNLAYN  
CGYFPAVSSIFRLLTCGAVIINLVSHCERVYYQRTRICNVIDHMIVNKNLSRESTEALQEFRN  
LVQNHPIEFNMANFFQLNYSLLVSIASVVVITYTIILLQSVN-

>BmorGR64

MKISLRKIVSIRNMTLIQNMFGFYHKFTDNRAIGVLLKIFCGFYSLFSLFLCINCTPRFTNDF  
LTYDIFFVIEYLTSVLVCLLYDGQYFLNYLYDLKLIDREAGIEESLEKLPISQPLFLIFITRVI  
YLLSCLLMFDGIKDSLFLPAQSSVFGANFTEFARTIGYFPRVIMFEMFYKRVNYLKSQLRN  
DLAHANLYPIGFVCSKVIMKYINFYKLLLRNLQQNSLQFKILMSMSSLYIIKALASAYAFIY  
REDGVHVFIFIEFATGVFLFFVMSSIIISIFNEIEDIRQIVLAQLRYCKQGANTKRVQDALTILN  
IRCFKYALCRIYTVDFTFILRILDVSVTYVIVLVQFTHILD-

>BmorGR66

MKRKLLKFFPNKEYNNIVEATHLWKLIRKLTGLSVLTLESKEGNRIETRFSSLGFFVFFLLWF  
TIYFYCTYKAHNEQDQILRNIYSTKLQRYGDDFERITSIIYVLYSMWKLPFQISGNRLLQEI  
VDIDKAIESVGVITIDYKKNATFALFIYIGQIATYLFRLFCVWGCLGNLNSPVPVEKLYQDIF  
TDALSLLTSQYCFSLVILRDRCRYINKILCGIENRESSRLRLFVYSSMPGAEKDITCRKIKD  
CSKIYGMIIYKAVESTNITYGFALVLTMLLYLIFIIYLMFYFMEATAAGLFLDTKKYIDFLICV  
LSELLHAMLIIFLNIYFSEETVKETRITTSFV-

>BmorGR67

MRERKKKFNKLLNTRNYNNIVEALLPSDSIRKISGVSVVYLAVNSENRIVTKFSFIGTIFFLF  
WYILYFYCTYKAHSEDQITLRTIYNTKLRKRYGDDFERIASIIYVLYSMWKVPFRMSGNQVF  
IQRIVDIDSAIENMGEAVDYNKNAKTALVISIAQLGDFLVRMFCIWLSLENLSVIVPTEKLY  
QVVYTDALS FVITSHYCFSLIVLRGRYKYINKVLSEIKTRSAWEYKV FVRNKVAPDLEKVQ  
RLQDRIVCEKIKACARIYSMLYKATEAINRMYG TALVLTMLLYLVFIILYMFYFMEATASGL  
LYDIKKYVDFLICVFWQMSHALSIIYANVYFSEITREVCKF-

>BmorGR68

MRFGKAGAAVVTILRPYNLCLKNIFKPFYVMLSLLGLFPYSIRFLGGKQFLIKPKSIYTNA  
VCALSLMLSMTLFLIFHIDHIIYKSTEDNSLTEGFMTQVNYIIEMLNLEIFCVVYFSSFLNR  
NKFVKVLNTVAVWSDRISISGIKTL SFLRLKIHF SIGILMFL LISQVCVNFTRVDSLWKKVLV  
MFTFNIPQMIQFTAILFYIILVNMVITLLVIIQENISISTRDTKTSSFIRVEHRMPLSLKQLELI

YIKAFELKRDINKAFEAPILLTTMQCFHSIVSESHIIYHGAVMEPHMVLHSIMNCSVWILYQ  
LFKLYILASTGHLLQEKIQHFSNLIHFHGKGLTVYGLFPLDGTLMFKVVASAAMYLIILVQF  
DKRN-

>DpleGR24

MGVLPTRTSPGHNQFKMLSPSMVYSIFCFLGLVSYVMYLSLHKVQILRTTEGKFEEAVIE  
YLFTVYLFPMVVPPIIWIYETRKIANILNGWVDFEVCYKKLSSRVLPIKMYKKALTMAVVI  
PILSTSSVIIITHVTMVDKVMQILPYVFLEILTYLLGGYWYLLCETLSFCAGILAEFDHQAL  
RHVGPAGKVAEYRALWLRLSKLAQDTGLANCYTFTFVNLYLFLIITLSIYGLLSQISEGFGI  
KDIGLFVTACCSIFLLFFICDEAHYASLNVRTNFQKLLMVELSWMNTDAQTEVNMFLRA  
TEMNPSQISLGGFFDVNRNLFKSLLATMVTYLVVLLQFQISIPDNTQDTYEDEKLITNDTTA  
TDATEKITTTLATTILTLAKKKKKN-

>DpleGRP59

MPLQPIKLPLKKHRKGRPRWQYLPEVPGYVPVYIRNGDTPLEEINPELAEAFHALPSGRSA  
GKQVEASEAIETEQGNPEKPSYNDRRHEKKALEKKKKYENVRPAERR-

>DpleGRP21a

MIPDHLFDEGINNSLLRNDMKHVHLNRIVYNKTQKDYERDQRNLLSSQDGDTCIEHDQF  
YRDHKLKLLVLFRALAVMPITRSRPGTITFSWKSRAITYAIFFYIVTTIIVLVVGYERLMILRSI  
KKFDDYIYSVLFVAFLVPHFWIPFVGWVAHQVAIYKTNWGKFQVRYRVTGENLKFPNL  
KTSIVIISVGCLLLAVCFLLSLCALLDGFLLRHTTAYYHIITMINMNCALWYINCKGIKIASQ  
SLSNCFSRDVSIECTASLISSYRFLWLNLSSELLQSLGNAYARTYSTYCLFMFFNITIAVYGAL  
SEIVDHGFRFSFKEMGLIVDAAYCSTLLFIFADCSHKSTLKVAAGVQDCLLSIDVLSVDRPT  
QKEVAAGVQDCLLSIDVLSVDRPTQKEIDHFIQAIEMNPAVVSLKGYAHVNRELLTSVCIN  
S-

>DmelGR5a

MRQLKGRNRCNRAVRHLKVQGKMWLKNLKSGLLEQIRESQVRGTRKNFLHDGSFHEAVA  
PVLAVAQCFCCLMPVCGISAPTYRGLSFNRRSWRFWYSSLYLCSTSVDLAFSIRRVASVLD  
VRSVEPIVPHVSILIASWQFLNLAQLWPGLMRHWAVERRLPGYTCCCLQRRARPARRLKL  
AFVLLVVSLEHLLSISVVYYDFCPRRSDPVESYLLGASQLFEVFPYSNWLAWLGKIQN  
VLLTFGWSYMDIFLMMLGMGLSEMLARLNRSLEQQVRQPMPEAYWTWSRTLYRSIVELI  
REVDDAVSGIMLISFGSNLYFICLQLLKSINTMPSSAHAVYFYFSLFLLSRSTAVLLFVSAIN  
DQAREPLRLLRLVPLKGYHPEVFRFAAELASDQVALTGLKFFNVTRKLFAMAGTVATYE  
LVLIQFHEDKKTWDCSPFNLD-

>DmelGR8a

MSGHLGRVLQFHLRLYQVLGFHGLPLPGDGNPARTRRRRLMAWSLFLLSLALVLAFLS  
GEEFLYRGDMFGCANDALKYVFAELGVLAIIYLETLSQRHLANFWLHFKLGGQKTGLV  
SLRSEFQQFCRYLIFLYAMMAAEVAIHLGLWQFQALTQHMLLFWSTYEPLVWLTYLRNLQ  
FVLHLELLREQLTGLEREMGLLAEYSRFASETGRSFPGFESFLRRRLVQKQRIYSHVYDML  
KCFQGAFNFSILAVLLTINIRIAVDCYFMYYSIYNNVINNDYYLIVPALLEIPAFIYASQSCMV  
VVPRIAHQLHNIVTDSGCCPCDLSLQIQNFSLQLLHQPDIRIDCLGLTILDCSLLTRMACSVG  
TYMIYSIQFIPKFSNTYM-

>DmelGR9a

MSLWLEHFLTGYFQLCGLVCGWSGSRGRLSSTFLVLILIELVGEIETYFTEENPDNESVP  
AYFAKVIMGVNMAKMIHAWIALSALFECRRFRYLLLEELPPVKATSFYRHLILEIILFACN  
AFLVLSEYTIRGIYLENLRYAYSLSQAVRARYLQMMVLVDRLDGLKLEQLHHRVISGSSDYKT

LRLDYAHLAKVTRSLSHLFGLSLLLLNVLCCLGDWIIVCNVYFMVAYLQVLPATLFLFGQV  
MFVVCPTLIKIWSICAASHRCVSKSKHLQQQLKDLPGQTPVERSQIEGFALQIMQDPIQIDV  
CGIYHLNLQTLAGMFFFLEALVIFLQFVSLVRT-

>DmelGR10a

MTSPDERKSFWERHEFKFYRYGHVYALIYGQVVIDYVPQRALKRGVKVLLIAYGHLFSM  
LLIVVLPGYFCYHFRTLDTLDRRLQLLFYVSFTNTAIKYATVIVTYVANTVHFEAINQRCT  
MQRTHLEFEFKNAPQEPKRPFEFFMYFKFCLINLMMMIQVCGIFAQYGEVKGKGSVSQVRV  
HFAIYAFVLWNYTENMADYCYFINGSVLKYRQFNLQLGSLRDEMGLRPGGMLLHHC  
CELSDRLEELRRRCREIHDLQRESFRMHQFQLIGLMLSTLINNLNFYTLFHMLAKQSLEE  
VSYVAVVGSVYATGFYIDTYIVALINEHIKLELEAVALTMRRFAEPREMDERLTREIEHLSLE  
LLNYQPMLCGLLHLDLRRLVYLIAVTAFSYFITLVQFDLYLRKKS-

>DmelGR10b

MRVGKLCRLALRFWMGLLVLGFSSHYYNPTRRRLVYSRILQTYDWLLMVINLGAFYLY  
YRYAMTYFLEGMFRRQGFVNQVSTCNVFFQQLLMAVTGTWLHFLFERHVCQTYNELSRIL  
KHDLKLKEHSRYCLAFLAKVYNFFHNFNFALSAIMHWGLRPFNVWDLANLYFVYNSL  
ARDAILVAVVLLLLNLSEALRLNGQQEHDYSDLMKQLRRRERLLRIGRRVHRMFAWLVA  
IALIYLVFFNTATIYLGTYMFIQKHDALGLRGRGLKMLLTVVSFLVILWDVVLLQVICEKLL  
AEENKICDCPEDVASSRTTYRQWEMSALRRAITRSPENNVLGMFRMDMRCAFALISCSL  
SYGIIIQIGYIPG-

>DmelGR22d

MFRPRCGLRQKFVYVILKSILYSSWLLGIFPFKYEPKRRRLRRSMWLILFGVVISSLLILM  
VKQSAEDREHGIMLDVFQRNALLYQISSLMGVVGVVSICTVHLRTLWRSKHLEEIYNGLM  
LLEAKYFCSNAVECPAFDGYVIQKGVVIVVGLLAPWMVHFGMPDSKLPVLNVLVSMVK  
LGTLLLALHYHLGVVVIYRFVWLNRELLSLVCSLRGNHKGSSSRVRFLKLYNKLVNLYS  
KLADCYDCQTVLMMAIFLAANIIVCFYMIVYRISLSKMSFFVMLIMFPLAIANNFMDFWL  
SMKVCDDLQKTGRQTSMLKLFNDIENMDKDLLEISISDFALYCSHRRFKFLHCGLFHVNRE  
MGFKMFVASVLYLLYLVQFDYMNL-

>DmelGR21a\_isoform\_A

MSFWAVSRGLTPPSKVVPMLNPNRQFLEDEVRYREKLKLMARGDAMEEVYVRKQETV  
DDPLELDKHDSFYQTTKSLLVLFQIMGVMPIHRNPPEKNLPRTGYSWGSKQVMWAIFIYS  
CQTTIVVLVLRERVKKFVTSPDKRFDEAIYNVIFISLLFTNFFLPVASWRHGPQVAIFKNMW  
TNYQYKFFKTTGSPIVFPNLYPLTWSLCVFSWLLSIAINLSQYFLQPDFRLWYTFAYYPIIA  
MLNCFCSLWYINCNAFGTASRALSDALQTTIRGEKPAQKLTEYRHLWVDLSHMMQQLGR  
AYSNMYGMYCLVIFFTIATYGSISEIIDHGATYKEVGLFVIVFYCMGLLYICNEAHYASR  
KVGLDFQTKLLNINLTAVDAATQKEVEMLLVAINKNPPIMNLDGYANINRELITTNISFMAT  
YLVVLLQFKITEQRRIGQQQA-

>DmelGR22b

MFGSSREIRPYLARQMLKTTLYGSWLLGIFPFTLDSGKRIRQLRRSRCLTYGLVLNYFLIF  
TLIRLAFEYRKHKLEAFKRNPVLEMINVVIGIINVLSALIVHFMNFWGSRKVGEICNELLIL  
EYQDFEGLNGRNCNPNCFVIQKCLTILGQLSFFTLNFALPGLEFHICLVLLSCLMEFSLNL  
NIMHYHVGVLIIYRYVWLINEQLKDLVSQLKNPETDFSRIHQFLSLYKRLELNRKLVIA  
YEYQMTLFIIAQLSGNIVVIYFLIVYGLSMRTYSIFLVAFPNSLLINIWDFWLCAACDLTEK  
AGDETAILKIFSLEHRDDKLEMSVNEFAWLCSHRKFRFQLCGLFSMNCRMGFKMIITTF  
LYLVYLVQFDYMNL-

>DmelGR22f

MKMFQPRRGFSCHLAWFMLQTTLYASWLLGLFPFTFDSRRKQLKRSRWLLLYGFVLHSL  
AMCLAMSSHLASKQRRKYNAFERNPLLEKIYMQFQVTTFFTISVLLLMNVWKSNTVRKI  
ANELLTLEGQVKDLLTLKNCNPNFCFVIKKHVAAGQFVVISIYFCLCQENSYPKILKILCCLP  
SVGLQLIIMHFHTEIILVYRYVWLNETLEDSSHLSRSSRIHALASLYDRLLKLSLVVACND  
LQLILMLIYLIGNTVQIFFLIVLGVSMNKRYIYLVASPLIINFWDWFLNIVVCDLAGKCGD  
QTSKVLKLFDTLEHDDEELERSLNEFAWLCTHRKFRFQLCGLFSINHNMGFQMIITSFLYL  
VYLLQFDFMNL-

>DmelGR22e

MFRPSGSGYRQKWTGLTLKGALYGSWILGVFPFAYDSWTRTLRRSKWLIAYGFVLNAAFI  
LLVVTNDTESETPLRMEVFHRNALAEQINGIHDIQSLSMVSIMLLRSFWKSGDIERTLNELE  
DLQHRYFRNYSLEECISFDRFVLYKGFVVLELVSMVLVLELGMSPNYSAQFFIGLGSCLM  
LLAVLLGASHFHLAVVFVYRYVWVWVRELLKLVNKMAIGETVESERMDLLLYLHRLLDL  
GQRLASIYDYQMMVMVMSFLIANVLGIYFFIISISLNKSLDFKILVFVQALVINMLDFWLN  
VEICELAERTGRQTSTILKLFNDIENIDEKLEERSITDFALFCSHRRLRFHHCGLFYVNYEMG  
FRMAITSFLYLLFLIQFDYWNL-

>DmelGR22a

MSQPKRIHRICKGLARFTIRATLYGSWVLGLFPFTFDSRRKRLNRKRWLLAYGLVLNLTLL  
VLSMLPSTDDHNSVKVEVFQRNPLVKQVEELVEVISLITTLVTHLRTFSRSSELVEILNELLV  
LDKNHFSKMLMLSECHTFNRYVIEKGLVILEIGSSLVLYFGIPNSKIVVYEAVCIYIVQLEVL  
MVMVHFHLAVIYIYRYLWIINGQLLDMASRLRRGDSVDPDRIQLLWLYSRLLDLNHRLT  
AIYDIQVTLFMATLFSVNIIVGHVLVICWINTRFSLLVIFLLFPQALIINFWDLWQGIACDL  
AESTGKKTSMILKLFNDMENMDQETERRVTEFTLFCSHRRLKVCHLGLLDINYEMGFRMI  
ITNILYVVFLVQFDYMNLKFKTD-

>DmelGR28a

MAFKLWERFSQADNVFQALRPLTFISLLGLAPFRLNLNPRKEVQTSKFSFFAGIVHFLFFVL  
CFGISVKEGDSIIGYFFQTNITRFSDBGTLRLTGILAMSTIFGFAMFKRQRLVSIQNNIVVDEIF  
VRLGMKLDYRRILLSSFLISLGMLLFNVIYLCVSYSLVVSATISPSFVTFTTFALPHINISLMV  
FKFLCTTDLARSRFSMLNEILQDILDAHIEQLSALELSPMHSVVNHRRYSHRLRNLISTPMK  
RYSVTSVIRLNPEYAIKQVSNIHNLCDICQTIEEYFTYPLLGIIAISFLFILFDDFYILEAILNP  
KRLDVFEADEFFAFLMQLIWIYIIVLIVEGSSRTILHSSYTAIVHKILNITDDPELRDRLF  
RLSLQLSHRKVLFTAAGLFRLDRTLIFTITGAATCYLIILIQFRFTHHMDDTSSNSTNNLHSI  
HLGD-

>DmelGR28b\_isoform\_A

MIRCGLDIFRGCGRFRYWLSARDCYDSISLMVAIAFALGITPFLVRRNALGENSLEQSWY  
GFLNAIFRWLLAYCYSYINLRNESLIGYFMRNHVSQISTRVHDVGGIIAAVFTFILPLLRK  
YFLKSVKNMVQVDTQLERLRSPVNFNTVVGQVVLVILAVVLLDTVLLTTGLVCLAKMEV  
YASWQLTFIFVYELLAISITICMFCLMTRTVQRRITCLHKVLKNLAHQWDRSLKAVNQKQ  
RSLQCLDSFSMYTIVTKDPAEIIQESMEIHHLICEAAATANKYFTYQLLTIISIAFLIIVFDAYY  
VLETLLGKSKRESKFKTVEFVTFSCQMILYLIAIISIVEGNSRAIKKSEKTGGIVHSLNKT  
KSAEVKEKLQQFSMQLMHLKINFATAAGLFNIDRTLYFTISGALTTYLIILLQFTSNPNNGY  
GNGSSCCETFNNMTNHTL-

>DmelGR32a

MSPNTWVIEMPTQKTRSHPYPRRISPYRPPVLNRDAFSRDAPPMPARNHDHPVFEDIRTILS



VLKASGLMPIYEQVSDYEVGPPTKTNEFYSSFFVRGVVHALTIFNVYSLFTPISAQLFFSYRE  
TDNVNQWIELLLCILTITLTVFVCAHNTTSMRIMNEILQLDEEVRRQFGANLSQNFGFLV  
KFLVGITACQAYIIVLKIYAVQGEITPTS YILLAFYGIQNGLTATYIVFASALLRIVYIRFFHIN  
QLLNGYTYGQQHRRKEGGARARRQRGDVNPVNPALMEHFPEDSLFIYRMHNKLLRIYK  
GINDCCNLILVSFLGYSFYTVTTNCYNLQVITGKGMVSPNQLWCFAWLCLHVSLLALLS  
RSCGLTTTEANATSQILARVYAKSKEYQNIIDKFLTKSIKQEVQFTAYGFFAIDNSTLKFIFSA  
VTTYLVILIQFKQLEDSKVEDPVPEQT-

>DmelGR33a

MIQIMNWFMSVIGLIPLNRQQSETNFILDYAMMCIVPIFYVACYLLINLSHIIGLCLLDSCNS  
VCKLSSHLFMHLGAFLYLTITLLSLYRRKEFFQQFDARLNDIDAVIQKCQRVAEMDKVKVT  
AVKHSVAYHFTWFLFCVFTFALYVDVRSYLYTFGNLAFIPFMVSSFPYLAGSIIQGEFIYHV  
SVISQRFEQINMLLEKINQEARHRHAPLTVFDIESEGKKERKTVTPITVMDGRTTTFGNEN  
KFAGEMKRQEGQQKNDDDDLDTSNDEDEDDFDYDNATIAENTGNTSEANLPDLFKLHD  
KILALSVITNGEFGPQCVPYMAACFVVSIFGIFLETKVNFIVGGKSRLLDYMTYLYVIWSFT  
TMMVAYIVLRLCCNANNHKSQASAMIVHEIMQKKPAFMLSNDLFYNKMKSFLLQFLHWE  
GFFQFNGVGLFALDYTFIFSTVSAATSYLIVLLQFDMTAILRNEGLMS-

>DmelGR36a

MFDWVGLLLKVLYYGQIIGLINFEIDWQRGRVVAQRGILFAIAINVLICMVLQISKKF  
NLDVYFGRANQLHQYVIVMVSLRMASGISAILNRWRQRAQLMRLVECVRRLFLKKPHV  
KQMSRWAILVKFSVGVSNFLQMAISMESLDRLGFNEFVGMASDFWMSAINMAISQHYL  
VILFVRAYYHLLKTEVRQAIHESQMLSEIYPRRAAFMTKCCYLADRIDNIAKLQNLQSI  
TQLNQVFGIQGIMVYGGYYIFSVATTYITYSLAINGIEELHLSVRAAALVFSWFLFYYS  
LNLVFMKLFDHDKEMERILEERTLFTSALDVRLEQSFESIQLQLIRNPLKIEVLDIFITR  
SSAAMIGSIITNSIFLIQYDMEYF-

>DmelGR36b

MVDWVVLKAVHIYCYLIGLSNFEFDCRTGRVFKSRRCTIYAFMANIFILITIIYNFTA  
HGD TNLLFQSANKLHEYVIIIIMSGLKIVAGLITVLNRWLQRGQMMQLVKDVIRLYMINP  
QLKS MIRWGILLKAFISFAIELLQVTLSDALDRQGTAEMMGLLVKLCVSFIMNLAISQHF  
VILLI RAQYRIMNAKLRMVIEESRRLSFLQLRNGAFMTRCCYLSQLEDIGEVQSQQLQ  
SMVGQL DEVFGMQGLMAYSEYLSIVGTSYMSYSIYKYGPHNLKLSAKTSIIVCILITL  
FYLDALVNC NNMLRVLDHDKDFLGLLEERTVFASSLDIRLEESFESLQLQLARNPLKIN  
VMGMFPITRGS TAAMCASVIVNSIFLIQFDMEFF-

>DmelGR36c

MDLESFLLGAVYYYGLFIGLSNFEFDWNTGRVFTKKWSTLYAIALDSCIFALYIYHWTG  
NT NIVNAIFGRANMLHEYVVAILTGLRIVTGLFTLILRWYQRCKMMDLASKVVRMYVAR  
PQ VRRMSRWGILTKFIFGSITDGLQAMVLSAMGSVDSQFYGLGLQYWMFVILNMAMMQ  
QHMIML FVRTQFQLINTEL RQVIDEAKDLLSPRHQGVFMTKCCSLADQIENIARIQS  
QLQ TIMNQMEEVFGIQGAMTYGGYYLSSVGTCLAYSILKHGYENLSMTLSTVILAYS  
WCFFY YLDGMLNLSVMLHVQDDYWEMLQILGKRTIFVGLDVRLEEAFENLNLQLIRN  
PLKITVV KLYDVTRSNTMAMFGNLITHSIFLIQYDIEHF-

>DmelGR39a\_isoform\_A

MSKVCRDLRIYLRLLHIMGMMCWHFSDHCQLVATSGSERYAVVYAGCILVSTTAGFIFAL  
LHPSRFHIAIYNQTNFYEAIVFRSTCVLFLVYVILYAWRHRDYLQVHILRLNRR  
CASSC TNQQLHNIILYGMLTILCFGNYLHGYTRAGLATLPLALCMLVYIFAFVLCLLL  
MFFVSLK

QVMTAGLIHYNQQLCQGDLSGLRGRQQILKLCGGELNECFGLMLPIVALVLLMAPSGPF  
FLISTVLEGKFRPDECLIMLLTSSTWDTWPMIMLVMLRTNGISEEANKTAKMLTKVPRTG  
TGLDRMIEKFLLNLRQKPILTAYGFFALDKSTLFLKFTAIFTYMVILVQFKEMENSTKSN  
KF-

>DmelGR39b

MLYSFHPYLKYFALLGLVPWSESCAQSKFVQKVYSAILIILNAVHFGISYFPQSAELFLSLM  
VNVIVFVARIVCVTVIILQVMVHYDDYFRFCREMKYLGRLRLQCELKIHVGRLKWQSYAKI  
LALGIGFLVTVLPSIYVALSGSLLYFWSSLLSILIIRMQFVLVLLNVELLGHVSLGIRLQN  
VLECHLMGANCTLDGNANRLCSLEFLLALKQSHMQLHYLFTHFNDFGWSILGTYYVLF  
SDSTVNIYWTQQVLVEVYKYLYATFSVFPVSPFNILVFCRCGEFCQRQSVLIGSYLRNLS  
CHPSIGRETSYKDLLMEFILQVEQNVLAINAEGFMSTDNSLLMSILAAKVTYLIVLMQFSS  
V-

>DmelGR43a\_isoform\_A

MEISQPSIGIFYISKVLALAPYATVRNSKGRVEIGRSWLFTVYSATLTVVMVFLTYRGLLFD  
ANSEIPVRMKSATSQVVTALDVSVVVMAIVSGVYCGFLSLNDTLELNDRLNKIDNTLNAY  
NNFRDRWRALGMAAVSLLAISILVGLDVGTWMRIAQDMNIAQSDTELNVHWYIPFYSL  
YFILTGLQVNANTAYGLGRRFGRLNRMLSSSFLAENNATSAIKPQKVSTVKNVSVNRPAM  
PSALHASLTKLNGETLPSEAAAKNKGLLLKSLADSHESLGKCVHLLSNSFGIAVLFILVSL  
LHLVATAYFLFLELLSKRDNGYLWVQMLWICFHFLRLLMVVEPCHLAARESRTIQIVCEI  
ERKVHEPILAEAVKKFWQQLLVVDADFSACGLCRVNRILTSAIAIATYLVILIQFQRTNG-

>DmelGR47a

MAFTSSQLCSLLTKFTALNGLNTYYFDTKTNAFRVSSKLKIYCAIHHALCVLALAHMSYST  
ASNLRVSVTVLTIGGTMACCVKSCWEKAQGIRNLARGLVTMEQKYFAGRPSGLLLKCRY  
YIKITFGSITLLRIHLIQPIYMRLLPSQFYLVNGAYWLLYNMLLAAVLGFYFLLWEMCRIQ  
KLINDQMTLILARSGQRNRLKKMQHCLRLYSKLLLLCDQFNSQLGHVAIWWLACKSWCQ  
ITFGYEIFQMVAAPKSIDLTMSMRVFIIFTYIFDAMNLFGLTDISELSTFRADSQRILRETSR  
LDRLLSMFALKLALHPKRVLVLLNVFTFDRKLTLLAKSTLYTICCLQNDYNKLKA-

>DmelGR47b

MQRDDGFVYCYGNLYSLLLYWGLVTIRVRSRDRGGAFSNRWTVCYALFTRSFMVICFMA  
TVMTKLRDPESAAMFGHLSPLVKAIFTWECLSCSVTYIEYCLSLDLQKDRHLKLVARMQ  
EFDRSVLMVFPVQWNYRRARLKYWYGTIVVGFVCFSSISLIFDTTRCTCGIPSTLLMAF  
TYTLLTSSVGLLGFVHIGIMDFIRVRLRLVQQLLHQLYQADDSSSEVHERIAYLFEMSKRCSF  
LLAELNGVFGFAAAAGIFYDFTIMTCFVYVICQKLLEREPWDPEYVYMLLHVAIHTYKVV  
ITSTYGYLLLREKRNCMHLLSQYSRYFSGQDVARRKTEDFQHWRMHNRQAAMVGSTTL  
LSVSTIYLVYNGMANYVILVQLLFQQQIKDHQLTSGKDVDIVGPMGPITHMD-

>DmelGR57a

MAVLYFFREPETVFDCAAFICILQFLMGCNGFGIRRSTFRISWASRIYSMSVAIAAFCCFLGS  
LSVLLAEEDIRERLAKADNLVLSISALELLMSTLVFGVTVISLQVFARRHLGIYQRLAALDA  
RLMSDFGANLNYRKMRLKNI AVLGIVTTIYLMAINSAAVQVAGHRALFLFALCYTIVTG  
GPHFTGYVHMTLAEMLGIRFRLQQLLQPEFLNWRFPQLHVQELRIRQVVSMIQELHYLI  
QEINRVYALSWAAMAHDLMSTSELYILFGQSVGIGQQNEEENGSCYRMLGYLALVMIP  
PLYKLLIAPFYCDRTIYEARRCLRLVEKLDWFPQKSSLRPLVESLMSWRIQAKIQFTSGLD  
VVLSRKVIGLFTSILVNYLLILIQFAMTQKMGEQIEQQKIALQEWIGF-

>DmelGR58a

MLLKFMYYIGIGCGLMPAPLKKGQFLLYKQRWYLIYTAACLHGGLLTVLPFTFPHYMYD  
DSYMSSNPVLKWFNLTNITRIMAMFSGVLLMWFRKRILNLGENLILHCLKCKTLDNRS  
KKYSKLRKRVRNVLFQMLLVANLSILLGALILFRIHSVQRISKAMIVAHTQFIYVVFMMT  
GICVILLVLHWQSERLQIALKDLCFLNHEERNSLTSENKANRSLGKLAKLFLFAENQR  
LVREVFRTFDLPIALLLLKMFTNVNLVYHGVQFGNDTIETSSYTRIVGQWVVISHYWSAV  
LLMNVDVTRRSDLKMGDLLREFSHLELVKRDFHLQLELFSHDLRCHPSTYKVCGLFIF  
NKQTSLAYFFYVLVQVLVLVQFDLKNKVEKRN-

>DmelGR58b

MLHPKLGRVMNVVYYHSVVFALMSTTLRIRSCRKCLRLEKVSRTYTIYSFFVGIFLFLNLY  
FMVPRIMEDGYMKYNIVLQWNFFVMLFLRAIAVVSICYGTLWLKRHKIIQLYKYSLIYWK  
RFGHITRAIVDKKELDLQESLARIMIRKIIILYSAFLCSTVLQYQLLSVINPQIFLAFCARLT  
HFLHFLCVKMGFFGVLLNHQFLVIHLAINALHGRKARKKWKALRSVAAMHLKTLRLA  
RRIFDMFDIANATVFINMFMNTAINILYHAVQYSNSSIKSNGWGILFGNGLIVFNFWGTMAL  
MEMLDSVVTSCNNTGQQLRQLSDLPKVGPKMQRELDVFTMQLRQNRVYKICGIVELDK  
PACLS YIGSILSNVILMQFDLRRQRQPINDRQYLIHLMKNKTKV-

>DmelGR58c

MNQYFLLHTYFQVSRILGLCNLHYDSSNHRFILNHVPTVVYCVILNVVYLLVLPFALFVLT  
GNIYHCPDAGMFGVVYNVVALTKLLTMLFLMSSVWIQRRLYKLGNDLMKMLHKFRFN  
LGNDRCNRCLCKGLLTSSRFVLLTQQLLTRDSVVNCESSSLRQAMVPYQSAIVYALIMI  
LLMSYVDMTVYMVEVAGNWLLVNMTQGVREMVQDLEVLPERNGIPREMGLMQILAAW  
RKLWRRCRRLDALLKQFVDIFQWQVLFNLLTYIFSIAVLFRLWIYLEFDKNFHLWKGILY  
AIIFLTHHVEIVMQFSIFEINRCKWLGLEDVGNLWDINYSGRQCICKSSGTILSRKLEFSLLY  
MNRKQLNPKRVRRHLIVGLFDLSNLTVHNMTRSITNVLVLCQIAYKKYG-

>DmelGR59a

MKRIGQAYNVYAVFIGMTSYETMGGKFRQSRITRIYCLLINAIFLTLPSAFWWSAKLLSTA  
DWMPYSYMRVTPYIMCTINYAAIAYTLISRCYRDAMLMDLQRIVLEVNRREMLRTGKKMNS  
LLRRMFLLKTFTLTYSCLSYILAVFIYQWKAQNWSNLCNGLLVNISLTLFVNTFFYFTSLW  
HIARGYDFVNQQLNEIVACQSMDLERKSKELRGLWALHRNLSYTARRINKHYGPQMLAM  
RFDYFIFSIINACIGTIYSTTDQEPSLEKIFGSLIYWVRSFDFLNDYICDLVSEYQMOPKFFA  
PESSMSNELSSYLIYESSTRLDLLVCGLYRVNKRKWLQMVGSIVVHSSMLFQFHLVMRGG  
L-

>DmelGR59b

MVYWMIKLYFRYSLAIGITSQQFSNRKFFSTLFSRTYALIANIVTLIMLPIMWQVQLVFQQ  
KKTFPKLILITNNVREAVSFLVILYTVLSRGFRDTAFKEMQPLLLTLFREEKRCGFKGIGGV  
RRSLRILLFVKFFTLVLCVTDVLFLLYSTDALIWVNVLRFFFKCNTNNILEMVPMPGYFLA  
LWHIARGFDCVNRRLDQIVKSKSTRKHRELQHLWLLHACLTKTALNINKIYAPQMLASRF  
DNFVNGVIQAYWGAVFTFDLSTPFFVWVYGSVQYHVRCLDYIDLNMCDVAVEYHDSA  
KHSWSEVRWTKISSYVIYANSTKLQLWSCGLFQANRSMWFAMISSVLYIYLVLVLLQFHLV  
MRK-

>DmelGR59c

MVDLVKTILLIAYWYGLAVGVSNEVDWLTGEAIATRRTTIYAAVHNASLITLLILFNLGNN  
SLKSEFISARYLHEYFFMLMTAVRISAVLLSLITRWYQRSRIFIRIWNQILALVRDRPQVVVRG  
RWYRRSIIKFCVLSDSLHTISDVSAQRKRITADLIVKLSLLATLTTIFNMIVCQYYLAMV  
QVIGLYKILLQDLRCLVRQAECICSIRNRRGGVYSIQCCSLADQLDLIAERHYFLKDRLDE

MSDLFQIQSLMSLVYFFSTMGSIYFSVCSILYSSTGFGSTYWGLLLIVLSTASFYMDNWLS  
VNIGFHIRDQQDELFRVLADRTLPHYRELDNRLEAAAFENFQLQLASNRHEFYVMGLFKMER  
GRLIAMLSSVITHMTMVLVQWEIQNDES-

>DmelGR59d

MADLLKLCRIAYAYGRLTGVINFKIDLKTGQALVTRGATLISVSTHLLIFALLYQTMRKS  
VVNVMWKYANSLHEYVFLVIAGFRVVCVFLVSRWSQRRTFVRLFNFRRLYQRNPDII  
QYCRRSIVSKFFCVTMTETLHIIVTLAMMRNRLSIALALRIWAVLSLTAIINVITQYYVATA  
CVRGRYALLNKDLQAIVTESQSLVPNGGGVFVTKCCYLADRLERIAKSQSDLQELVENLS  
TAYEGEVVCLVITYYLNMLGTSYLLFSISKYGNFNGNLLVITLCGIVYFVYVDCWINAF  
NVFYLLDAHDKMVKLLNKRTLFPGLDHRLEMVFENFALNLVRNPLKLHMYGLFEFGR  
GTSFAVFNSSLTHSLLLIQYDVQNF-

>DmelGR59e

MDSSYWENLLLINRFLGVYPSGRVGVLRWLHTLWSLFLMYIWTGSIVKCLEFTVEIPTI  
EKLLYLMEFFPGNMATIAILVYAVLNRPLAHGAELQIERIITGLKGKAKRLVYKRHGQRTL  
HLMATTLVVFHGLCVLVDVVNYDFEFWTTWSSNSVYNLPGLMMSLGVLYAQPVHFLWL  
VMDQMRMCKELKLLQRPPQGSTKLDACYESAFAVLVDAGGGSALMIEEMRYTCNLIEQ  
VHSQFLLRFLGLYLVLNLLNSLVSICVELYLIFNFETPLWEESVLLVYRLLWLAMHGGRIWF  
ILSVNEQILEQKCNLCQLLNELEVCSRLQRTINRFLQLQRSIDQPLEACGIVTLDTRSLGG  
FIGVLMIAIVFLIQIGLGNKSLMGVALNRSNWVYV-

>DmelGR59f

MRSSATKGAKLKNSPRERLSSFPQYAERYKELYRTLFWLLISVLANTAPITILPGCPNRF  
YRLVHLSWMILWYGLFVLGSYWEFVLVTTQRVSLDRYLNAIESAIYVVHIFSIMLLTWQC  
RNWAPKLMNTIVTSDLNRAYTIDCNRTKRFIRLQLFLVGIFACLAIFFNIWTHKFVYRSILS  
INSYVMPNISSISFAQYYLLLQGIAWRQRRLTEGLERELTHLHSPRISEVQKIRMHHANLID  
FTKAVNRTFQYSILLFLVGCFLNFNLVFLVYQGIENPSMADFTKWVCMLLWLAMHVGK  
VCSILHFNQSIQNEHSTCLTLLSRVSYARKDIQDTITHFIIQMRTNVRQHVVCGVINLCLKFL  
TLLVASADFFIFLLQYDVTYEALS KSVQGNVTRYK-

>DmelGR61a\_isoform\_A

MSRTSDDIRKHLKVRQKQRAILAMRWCAQGGLEFEQLDTFYGAIRPYLCVAQFFGIMP  
LSNIRSRDPQDVKFKVRSIGLAVTGLFLLLGGMKTLVGANILFTEGLNAKNIVGLVFLIVG  
MVNWLNFVGFARSWSHIMLPWSSVDILMLFPYKRGKRSLSKVNVLALS VVVAVGDH  
MLYASGYCSYSMHILQCHTNHSRITFGLYLEKEFSDIMFIMPFNIFSMCYGFWLNGAFTF  
LWNFMDIFIVMTSIGLAQRFQQAARVGALEGRHVPEALWYDIRRDHIRLCELASLVEAS  
MSNIVFVSCANNVYVICNQALAIFTKLRHPINYYVFWYSLIFLLARTSLVFMTASKIHDASL  
LPLRSLYLPSDGWTQEVQRFADQLTSEFVGLSGYRLFCLTRKSLFGMLATLVTYELMLLQ  
IDAKSHKGLRCA-

>DmelGR63a

MANYYRRKKGDVFLNAKPLNSANAQAYLYGVRKYSIGLAERLDADYEAPPLDRKKSS  
DSTASNNPEFKPSVFYRNIDPINWFLRIIGVLPVIRHGPAPAKFEMNSASFIYSVVFVLLAC  
YVGYVANNRIHIVRSLSGPFEEAVIAYLFLVNILPIMIIPILWYEARKIAKLFNDWDDFEVLY  
YQISGHSPLKLRQKAVYIAIVLPILSVLSVVITHVTMSDLNINQVVPYCILDNLTAMLGAW  
WFLICEAMSIHAHLAERFQKALKHIGPAAMVADYRVLWLRLSKLTRDTGNALCYTFVFM  
SLYLFFIITLSIYGLMSQLSEGFGIKDIGLTITALWNIGLLFYICDEAHYASVNVRTNFQKLL  
MVELNWMNSDAQTEINMFLRATMNPSTINCGGFFDVNRTLKGLLTMVTYLVVLLQF

QISIPTDKGDSEGANNTVVDFVMDSLDNDMSLMGASTLSTTTVGTTLPPPIMKLGKRGK-  
>DmelGR64a

MKGPNLNFRKTPSKDNGVKQVESLARPETPPPKFVEDSNLEFNVLASEKLPNYTNLDLFH  
RAVFPFMFLAQCVAIMPLVGIRESNPRRVRFAYKSIPMFVTLIFMIATSILFLSMFTHLLKIGI  
TAKNFVGLVFFGCVLSAYVVFIRLAKKWPVAVVRIWTRTEIPFTKPPYEIPKRNLSSRRVQLAA  
LAIIGLSLGEHALYQVSAILS YTRRIQMCANITTVP SFNNYMQTNYDYVFQLLPYSPHIAVLI  
LLINGACTFVWNYMDL FIMMISKGLSYRFEQITTRIRKLEHEEVCE SVFIQIREHYVKMCE  
LLEFVDSAMSSLILLSCVN NLYFVCYQLLN VFNKLRWPINYYFWYSLLYLIGRTAFVFLTA  
ADINEESKRGLGVLRRVSSRSWCVEVERLIFQMTTQTVALSGKKFYFLTRLLFGMAGTIV  
TYELVLLQFDEPNRRKGLQPLCA-

>DmelGR64b

MPQGETFHRAVSNVLFISQIYG LLPVSNVRALDVADIRFRWCSPRILY SLLIGILNLSEFGAVI  
NYVIKVTINFHTSSTLSLYIVCLLEHLFFWRLAIQWPRIMRTWHGVEQLFLRVPYRFYGEY  
RIKRRIYIVFTIVMSSALVEHCLLLGNSFHLSNMERTQCKINVTYFESIYKWERPHLYMILP  
YHFWMLPILEWVNQTIAYPRSFTDCFIMCIGIGLAARFHQLYRRIA AVHRKVMPAVFWTEV  
REHYLALKRLVHLLDAAIAPLVLLAFGNNMSFICFQLFNSFKNIGVDFLVM LAFWYSLGFA  
VVRTLLTIFVASSINDYERKIVTALRDVPSRAWSIEVQRFSEQLGNDTTALS GSGFFYLTRSL  
VLAMGTTIITYELMISDVINQGSIRQKTQYCREY-

>DmelGR64c\_isoform\_A

MQQSGQKGTTRNTLQHAIGPVLVIAQFFGVLPVAGVWPSCRPERVFRFRWISLSLLAALILFV  
FSIVDCALSSKVFDHGLKIYTIGSLSFSVICIFCFGVFLLLSRRWPYIIRRTAECEQIFLEPEY  
DCSYGRGYSSRLRLWGVCM LVAALCEHSTYVGSALYNNHLAIVECKLDANFWQNYFQR  
ERQQLFLIMHFTAWWIPFIEWTTLSMTFVWNFVDIFLILICRGMQMR FQQMHWRIRQHVR  
QQMPNEFWQRIRCDLLDSDL LGIYDKELSGLIVLSCAHNMYFVCVQIYHSFQSKGNYAD  
ELYFWFCLSYVIIRVLNMMFAASSIPQEAKEISYTYEIPTEFWCVELRRLNEIFLSDHFALS  
GKGYFLLTRRLIFAMAATLMVYELVLINQMAGSEVQKSFCEGGVGSSKSIFS-

>DmelGR64d\_isoform\_A

MLSTKIVLNDGLQLYTMGSL SFSVICIFCFGSFIKLSRRWPHIIRETALCERIFLKPCYANQEG  
LNFTRFLRRWALILLVAALCEH LTYVGSAAWSNYVQIRDCNLKVG FVENYFLRERQELFS  
VFEYRAWMVFFIEWNTMAMTFVWNFGDIFLFLMCRGLKIRFQQLHWRIRQNLGKPM AK  
EFWQEIRSDFLDLDL SLLKLYDKELSGLILVCCAHNMYFICVQVYHSFQVKGAFMDELYFW  
FCLLYVISRLMNMMLAASSIPQEIKDISNTLYEVRSSPWCELGRLSEMLRNETFALS GMG  
YFYVTRRLIFAMAGALMGYELV LFRQM QGAVVQKSICSRGPGSSMSIFFS-

>DmelGR64e\_isoform\_A

MARTTGDPAKRRRCMSRIKFWRRSRV GSEVVEKDTKRFKLSLIKAWLLRIRQEDYKYS GS  
FQEAIKPVLIIAQIFALMPVRKVSSKFAEDLTFTWFSVRSYALVTILFFGVSSGYMVA FVTS  
VSFNFD SVETLVFYLSIFLISL SFFQLARKWPEIAQSWQLVEAKLPPLKLPKERRSLAQHIN  
MITIVATTCSLVEHIMSMLSMGY YVNSCPRPDRPIDSFYLSFSSVFYFVDYTRFLGIVGK  
VVNVLSTFAWNFNDFVMAVSVALAARFRQLNDYMMREARLPTTVDYWMQCRINFRNL  
CKLCEEVDDAISTITLLCF SNNLYFICGKILKSMQAKPSIWHALYFWFSLVYLLGRTLILSLY  
SSSINDESKRPLVIFRLVPREYWCDELKRFSEEVQMDNVALTG MKFFRLTRGVVISVAGTIV  
TYELILLQFN GEEKVPGCFEN-

>DmelGR64f

MKILPKLERKLRRLKKRVTRTSLFRKLDLVHESARKKAFQESCETYKNQIENEYEIRNSLP

KLSRSDKEAFLSDGSFHQAVGRVLLVAEFFAMMPVKGVTKHPSDLSFSWRNIRTCFSLLF  
IASSLANFGLSLFKVLNNPISFNISIKPIIFRGSVLLVLIVALNLARQWPQLMMYWHTVEKDL  
PQYKTQLTKWKMGHISMVMLLGMMLSFSAEHILSMVSAINYASFCNRTADPIQNYFLRTN  
DEIFFVTSYSTTLALWGKFQNVFSTFIWNYMDLFVMIVSIGLASKFRQLNDDLRFKGMN  
MAPSYWSERRIQYRNICILCDKMDDAISLITMVSFSNNLYFICVQLLRSLNTMPSVAHAVY  
FYFSLIFLIGRTLAVSLSYSSVHDESRLTLRYLRCVPKESWCPEVKRFTEEVISDEVALTGMK  
FFHLTRKLVLSVAGTIVTYELVLIQFHEDNDLWDCDQSYYS-

>DmelGR66a

MAQAEDAVQPLLQQFQQLFFISKIAGILPQDLEKFRSRNLEKSRNGMIYMLSTLILYVVLY  
NILIYSFGCEEDRSLKASQSTLTFVIGLFLTYIGLIMMVSDQLTALRNQGRIGELYERIRLVDER  
LYKEGCVMDNSTIGRRIRIMLIMTVIFELSILVSTYVKLVDYSQWMSLLWIVSAIPTFINTLD  
KIWFAVSLYALKERFEAINATLEELVDTHEKHKLWLRGNQEVPPPLDSSQPPQYDSNLEYL  
YKELGGMDIGSIGKSSVSGSGKNKVAPVAHSMNSFGAIDAASRKPPPPPLATNMVHESEL  
GNAAKVEEKLNNLCQVHDEICEIGKALNELWSYPILSLMAYGFLIFTAQLYFLYCATQYQSI  
PSLFRSAKNPFITVIVLSYTSKGKCVYLIYLSWKTSQASKRTGISLHKCGVVADDNLLYEIVN  
HLSLKLLNHSVDFSACGFFTLDMETLYGVSGGITSYLILIQFNLAQAQAKEAIQTFNSLND  
TAGLVGAATDMDNISSTLRDFVTTTMTPAV-

>DmelGR68a

MKIYQDIYPISKPSQIFAILPFYSGDVDDGFRFGGLGRWYGRVALIILIGSLTLGEDVLFASK  
EYRLVASAQGDTEEINRTIETLLCIISYTMVVLSSVQNASRHFRTLHDIKIDEYLLANGFRE  
TYSCRNLTLVTSAAAGGVLAVAFYIHYRSGIGAKRQIILLIYFLQLLYSTLLALYLRTLMM  
NLAQRIGFLNQKLDTFNLQDCGHMENWRELSNLIEVLCKFRYITENINCVAGVSLLFYFGF  
SFYTVTNQSYLAFATLTAGSLSSKTEVADTIGLSCIWVLAETITMIVICSACDGLASEVNGTA  
QILARIYGKSKQFQNLIDKFLTKSIKQDLQFTAYGFFSIDNSTLFKIFSAVTTYLVILIQFKQL  
EDSKVEDISQA-

>DmelGR77a

MPLPLGDPLALAVSPQLGYIRITAMPRWLQLPGMSALGILYSLTRVFGLMATANWSPRGIK  
RVRQSLYLRIHGCVMILFVGCSPFAFWCIFQRMAFLRQNRILLMIGFNRYVLLLVCAMT  
LWIHCFKQAEIIGCLNRLKCRRLRRLMHTRKLDKSDMDCLATKGHLLEV VVLLSSYLLS  
MAQPIQILKDDPEVRRNFMYACSLVFSVCQAILQLSLGMYTMAILFLGHLVRHSNLLLA  
KILADAEHIFESSQKAGFWPNRQELYKGQKWLALWLLHVHHQLLKLHRSICSLCAV  
QAVCFLGFVPLECTIHLFFTYFMKYSKFILRKYGRSFPLNYFAIAFLVGLFTNLLLIVLPTYY  
SERRFNCTREIIKGGGLAFPSRITVKQLRHTMHFYGLYLKNVEHVFAVSACGLFKLNAIL  
FCIVGAILEYLMILIQFDKVLNK-

>DmelGR85a

MYSLIEAQLLGGKLVNRVMASLRRIIQRSLGYFCALNGILDFNTDIGTGNLRRYRVLFMYR  
LLHNFAVISLTLKFLDFTDHFKEYIESSTLITVNNFFTYFTLVFFALLSSMGSCYQWQNRILAV  
LKELKHQRDLRHRMGYRVPRSKQNSIDYLLFALTVLLILRLSIHLATFTLSARMGFNHPCN  
CFLPECMIFSMNYLLFAILAEITRCWWSLQSGMKMVLNLRQLSTVAFNLWEIERLHTRFQC  
LIDLTSEVCSIFRYVTLAYMARNLWSGIVAGYLLVRFVIGNGLQDVELVYLVFSFITCIQPL  
MLSLLVNSMTSTTGLSVEVTRDILKISHKKS VNLERSIEWLSLQLTWQHHTVTFGVFRINR  
SLAFRSASLILVHVLYMVQSDYISITN-

>DmelGR89a

MLRFPHVCGLCLLLKYWQILALAPFRTSEPMVARCQRWMTLIAVFRWLLTSMAPFVLW

KSAAMYEATNVRHSMVFKTIALATMTGDVCISLALLGNHLWNRRELANLVNDLARLHRR  
RRLSWWSTLFLWLKLLLSLYDLLCSVPFLKGAGGRLPWSQLVAYGVQLYFQHVASVYGN  
GIFGGILLMLECYNQLEREPTNLARLLQKEYSWRLIQRVFKLQGLIFLLVLSFVNMIV  
NIYAFMSYYVSLHGVPLTISNNCLVLAIQLYAVILAAHLCQVRS AKLRKKCLQLEYVPEGLT  
QEAMASTPFPVLTPTGNVKFRILGVFILDNSFWLFLVSYAMNFIVVILQTSFEHINHGEI-  
>DmelGR92a

MFEFLHQMSAPKLSTSILRYIFRYAQFIGVIFFLHTRKDDKTVFIRNWLKWLNVTHRIITF  
TRFFVWYIASISIKTNRVLQVLHGMRLVLSIPNAVILCYHIFRGPEIIDLINQFLRLFRQVSD  
LFKTKTPGFGGRRELILLLNLISFAHEQTYLWFTIRKGFWRFLIDWWCDFYLVSATNIFIH  
INSIGYLSLGVLYSELNKYVYTNLRIQLQKLNSTSGSKQKIRRVQNRLEKCSLYREIYHTSIM  
FHKLFVPLFLALIYKVLIIALIGFNVAVEFYLSNFIFWILLGKHVLDLFLVTVSVEGAVNQF  
LNIGMQFGNVGDLSKFQTTLDLTLFLHLRLGHFRVSILGLFDVTQMQLYQFLSALLSGLAFI  
AQYRMQVGN-

>DmelGR93a

MFSSSAMTGKRAESWSRLLLLWLYRCARGLLVLSSSLDRDKLQKATKQGSRRNFLHIL  
WRCIVVMYAGLWPMILTSAVIGKRLESYADVLALAQSMSVSILAVISFVIQARGENQFREV  
LNRYLALYQRICLTTRLRHLFPTKFVVFFLLKLFFTLCGCFHEIPLFENSHFDDISQMVGTG  
FGIYMWLGTLCVLDACFLGFLVSGILYEHMANNIAMLKRMEPIESQDERYRMTKYRRMQ  
LLCDFADELDECAAISSELYHVTNSFRILQWQILFYIYLNFINICLMLYQYILHFLNDDEV  
VFSIVMAFVKLANLVLLMMCADYTVRQSEVPKPLDIVCSDMDERWDKSVETFLGQL  
QTQRLEIKVLGFFHLNNEFILLILSAIISYLFILIQFGITGGFEASEDIKNRFD-

>DmelGR93b

MSGLLVMPRILRCLNVSRI SAILLRSCFLYGTFFGVITFRIERKDSQLVAINRRGYLWICLVIR  
LLASCFYGYSYDAWSGQYEDMYLRAFFGFRLIGCLICSVIILVMQFWFGEELINLVNRFLQ  
LFRRMQSLTNSPKNRFGDRAEFLMFSKVFSLLFVMAFRLMLSPWFLTLVCDLYTSVGT  
GMITHLCFVGYLSIGVLYRDLN NYVDCQLRAQLRSLNGENNSFRNPNQPTRQAISNLKDC  
LYLYDEIHQVSRSFQQLFDLPLFLSLAQSLAMSMVSYHAILRRQYSFNLWGLVIKLLIDV  
VLLTMSVHSAVNGSRLRRLSFENFYVTDSSQSYHQKLELFLGRLQHQLRVFPLGLFEVSN  
ELTLFFLSAMVTYLVFLVQYGMQSQQI-

>DmelGR93c

MIERLKKVSLPALSAFILFCSCHYGRILGVICFDIGQRTSDDSLVVRNRHQFKWFCLSCRLIS  
VTAVCCFCAPYVADIEDPYERLLQCFRLSASLICGICIIVVQVCYEKELLRMIISFLRLFRVR  
RLSSLKRIGFGGKREFLLLFKFICLVYELYSEICQLWHLPSLSL FATLCEIFLEIGSLMIIHI  
GFVGYLSVAALYSEVNSFARIELRRQLRSLRPVGGPVGRKQLRIVEYRVDECISVYDEIER  
VGRTFHRLLELPVLIILLGKIFATTILSYEVIIRPELYARKIGMWGLVVKSFADVILLTLAVHE  
AVSSSRMMRRLSLENFPITDHKAWHMKWEMFLSRLNFFEFRVRPLGLFEVSNEVILLFLSS  
MITYFTYVVQYGIQTNR-

>DmelGR93d

MKATKYSVGILRFMSFYARFLSLVCFRLRKQKDNVWLEEIWSNRSRWKVISVTLRIVPL  
CIYAFTYAEWISNRMLITEKFLHSCSLVVSIPCYSIIHLKICHGPEVTCLVNQYLHIFRLGTL  
DIRRSQFGGRELFLILSVCCQIHEYVFILVIASRLCGFQHIIWWVSYTYVFIICNSIMCFG  
FIWHLSLGVLYAELNDNLRFESGFQTAFLRKQQRIRVQKSMALFKEISSVVTSLQDIFNVHL  
FLSALLTLLQVLVWYKMIIDLGFSDFRISFSLKNLIQTLLPVLAIQEAANQFKQTRERAL  
DIFLVGKSKHWMKSVEIFVTHLNLSEFRVNLGLFNVSNELFLIIVSAMFCYLVFVTQCVIV

YRRRYVI-

>DmelGR94a

MDFTSDYAHRRMVKFLTIILIGFMTVFGLLANRYRAGRERFRFSKANLAFASLWAIASFSL  
VYGRQIYKEYQEGQINLKDATTLYSYMNTVAVINYVSQMIISDHVAKVLSKVPFFDTLKE  
FRLDSRSLSYISIVLALVKTVAFPLTIEVAFILQRRQHPMSLIWTLYRLFPLIISNFLNNCYFG  
AMVVVKEILYALNRRLEAQLQEVENLLQRKDQLKLYTKYYRMQRFCALADELDQLAYRY  
RLIYVHSGKYLTPMSLSMILSLICHLLGITVGFYSLYYAIADTLIMGKPYDGLGSLINLVFLSI  
SLAEITLLTHLCNHLLVATRRSAVILQEMNLQHADSRYRQAVHGFTLLVTVTKYQIKPLGLY  
ELDMRLISNVFSAVASFLLILVQADLSQRFKMQ-

>DmelGR97a\_isoform\_A

MRFLRRQTRRLRSIWQRSPLVFRFRGKLTHTQLVTICLYATVFLNILYGVYLGRFSFRKKF  
VFSKGLTIYSLFVATFFALFYIWNINYEISTGQINLRDTIGIYCYMNVCVCLFNVTQWEKT  
LQIIRFQNSVPLFKVLDISAMIVWRAFIYGLLKIVFCPLITYITLILYHRRSISESQWTSV  
TTTKTMLPLIVSNQINNCFFGGLVLANLIFAAVNRKLHGIVKEANMLQSPVQMNLHKPYY  
RMRRFCELADLLDELARKYGFTASRSKNYLRFTDWSMVLSMLMNLGITMGCYNQYLAI  
ADHYINEEPFDLFLAIVLVFLAVPFELEVMVARISNQTLTRRTGELLQRFDLQHADARFKQ  
VVNAFWLQVVTINYKLMPLGLLELNTSLVNKFSSAIGSLLILIQSDLTLRFSLK-

>DmelGR98a

MEQMSGELHAASLLYMRRLMKCLGMLPFGQNLFSKGFYVLLFVSLGFSSYWRFSFDYE  
FDYDFLNDRFSSIDLSNFVALVLGHAIIVLELLWGNCSKDVDRLQAIHSQIKLQLGTSNS  
TDRVRRYCNWIYGSIIIRWLIFIVVTIYSNRALTINATYSELVFLARFSEFTLYCAVILFIYQEL  
IVGGSNVLDELYRTRYEMWSIRRLSLQKLAQLQAIHNSLWQAIRCLECYFQLSLITLLMKF  
FIDTSALPYWLYLSRVEHTRVAVQHYVATVECIKLEIVVPCYLCTRCDAMQRKFLSMFYT  
VTTDRRSSQLNAALRSLNLQLSQEKYKFSAGGMVDINTEMLGKFFFGMISYIVICIQFSINF  
RAKKMSNEQMSQNITSTSAPI-

>DmelGR98c

MEMEAKRSRLLTTARPYLQVLSLFGLTTPPAEFFTRTLRKRRCFCWMAGYSLYLIAILLMVF  
YEFHANIVSLHLEIYKFHVEDFSKVMGRTQKFLIVAIATCNQLNILLNYGRLGLIYDEIANL  
DLGIDKSSKNFCGKSHWWSFRLRLTSLIGLWVMIIGVIPRLTLGRAGPFFHWVNQVLTQII  
LIMLQLKGPEYCLFVLLVYELILRTRHVLEQLKDDLEDFDCGARIQELCVTLKQNQLLIGRI  
WRLVDEIGAYFRWSMTLLFLYNGLTILHVVNWAIIRSIDPNDCQLNRLGSITFLSFNLLT  
CFFSECCVKTYNSISYILHQIGCLPTAEFFQMLKMGLKEYILQMQLKLLFTCGGLFDINIK  
LFGGMLVTLGCVIIIIVQFKIQDFALIGYRQNTSDTS-

>DmelGR98d

MEANRSRLLAAARPYIQIYSIFGLTPPIQFFTRTLHKRRRGIVILGYACYLISISLMVIYECYA  
NIVALQKDIHKFHAEDSSKVMGNTQKVLVWAMFVWNQLNILLNFRRLARIYDDIADLEID  
LNNASSGFVQGRHWWRFRLALS VGLWVLLVGLTPRFTLVALGPYLHWTKVLTETIILI  
MLQLKCTEYCVFVLLIYELILRGRHILQQISVELEGNQSRDSVQELCVALKRNQLLAGRIW  
GLVNEVSLYFTLSLTLFLYNELTILQIVNVALIKSVNPNECCQYRRVGTCLLLSINIFLSCLY  
SEFCIQTYNSISRVLHQMYCLSAEYDYLILKMGLREYSLQMEHLKLIFTGGLFDINLKFFG  
GMVVTLFGYIIILVQFKIQFFAQSNFMQNINSTEKAYTA-

>DmelGR98b

MVAQKSRLARAFPYLDIFS VFALTPPPQSFGHTPHRRRLRWYLMTG YVVFYATAILATVFIVS  
YFNIIAIDEEVLEYNVSDFTRVMGNIQKSLYSIMAIANHLNMLIN YRRLGGIYKDIADLEMD



MDEASQCFGGQRQRFSFRFRMALCVGVWMILMVGSMPLRTMTAMGPFVSTLLKILTEFV  
MIMQQLKSLEYCVFVLIYELVLRRLRRTLSQLQEEFQDCEQQDMLQALCVALKRNQLLG  
RIWRLEGDVGSYFPTMLLLFLYNGLTILHMVNWAYINKFLYDSCCQYERFLVCSTLLVNL  
LLPCLLSQRCINAYNCFPRILHKIRCTSADPNFAMLTRGLREYSLQMEHLKLRFTCGGLFDI  
NLKYFGGLLVTFYIILIQFKVQAIAANRYKKVVN-

>HarmGR1

MIDYCSFCTRLSRGSFYPTDATSIPLSIFGNKGTSMNKEEHGFRVYNTNTVHKNETRKREM  
FQRIDEKDGKEYDAKDLYGPEITDKDGALLDAHDSFYITTKSLLVLFQIMGVMPIMRVPK  
NAQTTKRTTFNWISKATLWAYLVWSLECIIVVKVGRERLANFQSSANKRFDEVIYNIIFLSI  
LIPHFLPIASWRHGPQVAIFKNMWITHYQLKYLKITGTPIVFPNLYSLTWGLCVFSWGLSF  
AVILSQHYLQDDFELWHSFAYYHIIAMLDGFCSLWYINCNAFGTASRGLAMNLHKALEAE  
HPALKVAQYRHLWVDLSHMMQQLGRAYSNMYGIYCMVIFFTTTISLYGALSEILEHGLSY  
KEMGLFVIVGYCMTLLFIICNEAYHASRKVGLFQVRLNVLNLAGAVDRSTQREVEMFLVA  
ISKNPPIMNLDGFTNINRELFANVSFMSTYLIVLMQFKLTLLRQSARKTLKTIVRAVNTT  
TTILDDDFTDEVDEE-

>HarmGR2

MTIPDHLFDEGINNTLLQHDMRHVQQNRIVYEKTQREYEQEQRDMLSSQDGDTCIHDQ  
FYRDHKLKLLVLFRALAVMPITRSRPGTITFSWRSTATMYAVCFYIAATAVVMIVGYERIMIL  
RSIRRFDEYIYAILFVIFLVPFWIPFVGWVVAHQVAIYKTNWKGKQVRYRVTGENLKFP  
NLKTTIVMISVGCLLLAVCFLSLCILMDGFLLRHTTAYYHIITMINMNCALWYINCKGIKI  
ASQSLSECFRRDVEAECSAKLISRYRLWLNSELLQSLGNAYARTYSTYCLFMFANITIAV  
YGALSEIVDHGFGFSFKEMGLFVDAAYCSTLLFIFVDCSHNSTLTVAAAGVQETLLSIDVLSV  
DRPTQKEIDHFIQAIEMNPAVVSLKGYAHVNRELLTSAISMIAYLIVLLQFKISLPRDPQIVA  
T-

>HarmGR3

MSFHTSNLSLFPMTVPIPNFGFPVQINSKPKNKIIFLDVTPVSTPIKPHSPNVVPMRNNLVAPH  
ISNDIYENIKPVFTLLRIMGVLPITRPSACVNQFQIASSSMLYAILVFLSLVSYVLYLSLHKV  
QILRTAEGKFEEAVIEYLFTVYLFPMIAVPLLWYETRKIANVLNGWVDFEMVYKQLSGRTL  
PVKLYKKALAMAVIIPILSTTTVIVTHVTMVHFKPMQLVPYVFLEILTYMLGGYWYLLCET  
LSICANILAEDFQNALRHIGPAGKVAEYRALWLRLSKLSRDTGIANCYTFTFVNLYLFLIITL  
SIYGLLSQISDGFGIKDIGLALTAFCISILLFFICDEAHYASHNVRTNFQKLLMVELSWMN  
TDAQTEVNMFLRATERNPSQISLGGFFNVNRTLFKSLLATMVTYLVLLQFQISIPDESQN  
RDEEEVPYNITSATTEAMTTSTTTIMTTVLTTLAKKKKKKN-

>HarmGR4

MLNLCVSEIENKSVRNISSMREVLIDKIVKQKLDGLIGRLSGAIFYGNALISLFLSSKFVHS  
WRSLSNYWLRMETSTALDFPPDVRIRKRTIYITAFVVSVAVVEHILSMISATGVGFPEEFLY  
RYVTLSHGFILKAQDYTIWKAIPFVLSKLATALWNFQDLIILISMGLSSRYNRLNLYVRHI  
VSVEKQFESKQRFGTLYLQIQVWRRLREAYVRQSTLVRMVDRLNLSLVLLSNINLYFIC  
LQIYLGIIHKSSGSTISRCYFLFSLGWLIFRACSVVLAASDVHLHSQRALKSLHACPSAAYN  
VEIKRLQYQLAHDFVALTGMGFFSLRRELLLEVAAILKYELVLIQYDK-

>HarmGR5

MQNGWNNVISNISVGSVNTVNYLFRWTWERLAPNRNMDLYSLEKFKKYKNDWNYPVHVR  
YQDQVMAEKEKPRTTFTQAMKVTLTIGQCFGLNPVQGIREKDASKLRFKLLSGRCLFTFFS  
LIGQFIMAFVLFSLFKETSSTVDTATALIFYSFGFTTTILFFRIATNWPKLCMHIAKVESVDP

NTDNKLGKKFNACISILFLALMEHLFSELHGISIALDCFPDTPVYESFMKLSFQWLFQFIPY  
SDFAGGMAHFSNLQCTFNWNFADVVICMSMYLTARLEQVNQRIIAAKDKNSPSSFWRT  
MREDYNRSVHLVRQVDKIIGGVVFMFSANLFFVCSQLLHTLAGGIKASQRCKPEIGADR  
RFFYGYEHSIYFVFSFSLVIRSLAVSLTASKVHAASLEPAYSLYDVSSANYCVEVERFLDQI  
HGDTVALSGLQFFHVKRGLVLTIACTIVTYELVLMQFTGITPTTSPESVSGVIK-

>HarmGR6

DCSLTRKCNITCAVVLILALCEHILSLLSAFAGASACYSGMDTYEGFVTHFYPPWVFSYLPY  
SIVLGVITQFLHFQSTFIWNFSDLFVICMSYYLTSRLEQVNRKLLAAQGKYLPEIFWRATRE  
DYCRATQIVRKVDEVISGVVVFISFANNLFFICLQLFNTLEDGLKGTGECTPKLKKIVVSKSG  
PLGGHEAAAYFLFSLVYLLSRSVAVSLIASQVNSASSVPAPVLYDVPSVYCVQVQRFLDQ  
VNGDKVALSGLQFFSVTRGLLLTVAGTIVTYELVMFQFNSSTPTLNITSP-

>HarmGR7

AILSVLSSRLYRSWGQLSALWARVERIMAVKAPDKTLKRRMYFFLGFMTVCSLLEHIMS  
VVAIGLDCPPALIIKRYVLISHGFMLRHEYSWYALPLIFMSTLASLLWNFQDVLIVLISM  
GLTSRYSRLNQCLAKICALERKQMSDKKNETTKVYAWRKLREAYVKQAMLVRKVDDA  
IGGIILSCFCNFYFICLQLFLGITQSKASEPIKTAYYFMSLGWICFRVICVLAASDINVHSRL  
GLKYIYTHDSHSYNIEMGRLQDQLSKDYVALSGKGFYLSKSIILLQMAGAIITYELMLIQF  
DDQGTDDV-

>HarmGR8

YNWRTNIAGLWGKVERS VGVKIPVDKTLKCRMSFVAGLMTFCFFEHALSILASVGFDCP  
PSLILKRYVLVSHGFIFMGQDYSEWFAMPLVIISTIATLLWNFQDQLIVLISMGLTSRYRRLN  
ECLAKFCELEKQHMSDKKVEAVKVYTWKIREAYVKQAMLVRKIDVALGGIILSCSCN  
FYFICLQMFLGITQGMSTDFLTGLYIMVSLAWLCIRVLSVLAASGVNTHSKLALNHLTY  
YETHCYNVEVERLQDQLTKDYIALSGMGFFYLNKTILLQMAGAIITYELVLIQFDDQGS  
DGIALNA-

>HarmGR9

MGVESAKVEEVTAAPVPSESGARPSRPTHCVVGGAHAFILRISSFFGLAPLRFESRSNGFTV  
SISGAMCVYSYILVTVLICTIFGLVAEINVGVELSVRMSRMSQVVSTCDVLVVVATAGAG  
VYGAPRRMRNMLKFMENIASVDTSIGGQYSLVTERKLCGILAILIFFSILIADDFTFYALQA  
KKLDREWDVVTNYLGFYLLWFVVLILELQFAFTALSVRARFSVNDALALTARQVSIPVE  
KPKSSSPLNIYAIRVAPVDSQRSANVSLVDVTMTGREHVVIKRTASGEPRLVSPCDAVRR  
LAALHGTLCVNSIDDSYGLPLVILISTLLHLIVTPYFLIMEIIVSTNRIHFLVLQFLWCVT  
HMLRMIVVVEPGHYTIAEGKRTEGLVCRLMTSAPSTGVLPRLSRLQMLQSVSYAPM  
GMCTLHRPLIASVIGAVTTYLVILIQFQRYDN-

>HassGR1

MGQTSFRRNMSFWIPVKKNKVDVAKPKVKNITSFQDALRATLIIGQVFSLLPFVGVFTNVA  
SNVKFVKTSWKCVYSLSLIGQMFMVLCINKLAKTTVSLNGTSPVIFYVTTCVTMMLFF  
QVARRWPALVQHISKAEDMDPNFDCSLTRKCNITCAVVLILALCEHILSLLSAFAGASACYS  
GMDTYEGFVTHFYPPWVFSYLPYSIVLGVITQFLHFQSTFIWNFSDLFVICMSYYLTSRLEQ  
VNRKLLAAQGKYLPEIFWRATREDYCRATQIVRKVDEVISGVVVFISFANNLFFICLQLFNTL  
EDGLKGTGECTQKLLKIVVSKSGPLGGYEAAAYFLFSLVYLLSRSVAVSLIASQVNSASSV  
PAPVLYDVPSVYCVQVQRFLDQVNGDKVALSGLQFFSVTRGLLLTVAGTIVTYELVMFQF  
NSSTPSLNMSTPTVVTHTVTTLAT-

>HassGR2

GYERIMILRSIRRFDEYIYAILFVIFLVPFWIPFVGWVVAHQVAIYKTNWGKFQVRYRVT  
GENLKFPNLKTTIVISVGCLLLAVCFLLSLCILMDGFLLRHTTAYYHIITMINMNCALWYIN  
CKGIKIASQSLSECFRRDVEAECSAKLISRYRYLWLNLSSELLQSLGNAYARTYSTYCLFMFA  
NITIAVYGALSEIVDHGFGFSFKEMGLFVDAAYCSTLLFIFVDCSHNSTLTVAAGVQDTLLS  
IDVLAVD RPTQKEIDHFIQAIEMNPAVVSLKGYAHVNRELLTSAISMIAIYLIVLLQFKISLPR  
DPQIVAT-

>HassGR3

MTVPIPNPQVQINSKPKNKIIFLDVTPVSTPIKPHSPNVVAPMRNNLVAPHISNDIYENIKP  
VFTLLRIMGVLPITRPSACVNQFQIASSSMLYAILVFISLVSYVLYLSLHKVQILRTAEGKFEE  
AVIEYLFVYLFPMIAVPLLWYETRKIANVNLGWVDFEMVYKQLSGRTLTPVKLYKKALA  
MAVIIPILSTTTVIVTHVTMVHFKPMQLVPYVFLEILTYMLGGYWYLLCETLSICANILAE  
FQNALRHIGPAGKVAEYRALWLRLSKLSRDTGIANCYTFTFNLYLFLIITLSIYGLLSQISE  
GFGIKDIGLALTAFCSSILLFFICDEAHYASHNVRTNFQKLLMVELSWMNTDAQTEVNMF  
LRATEMNPSQISLGGFFNVNRTLFKSLLATMVTYLVVLLQFQISIPDESQNRDEEEVYPYNI  
TSATTEAMTTSTTTIMTTVLTTLAKKKKKN-

>HassGR4

MLWIQTHHYIGVESAKVEEVTAAPVPSESGSRPSRPTHCVVGGAHVFILRISSFFGLAPLRF  
ESRNGFTVTISGAMCVYSYILVTVLICTIFGLVAEINVGVELSVRMSSRMSQVVSTCDVL  
VVVATAGAGVYGAPRRMRNMLKFMENIASVDTSIGGQYSLVTERKLCGIIAILIFFSILIA  
DDFTFYALQAKKLDREWDVVTNYLGFYLLWFVVLILELQFAFTALSVRARFSVANDALAL  
TARQVSIPVEKPKSSSPLNIYAIRVAPVDSQRSANVSLVDTVTGREHVVIKRTASGEPLV  
VSPCDAVRRLAAPHGTLCDVVNSIDDSHGLPLVILISTLLHLIVTPYFLIMEIIVSTNRIHFL  
VLQFLWCVTHMLRMIVVVEPRHYTIAEGERTEGLVCRLMTSVPSTGVLPSRLEIFSRQLL  
QSVSYAPVGMCTLHRPLIASVIGAVTTYLVILIQFQRYDN-

>HassGR5

MSSKEFKQFMQKLLLPQQPIHDDFLDVIEKVFHWSCFYGVFVSKRFISLIWSTLILGSLV  
IEALAIWKVIRVLGVARMSGHRSVTARLAGTIFYISISLSLVLISKLYYNWRTDIAGVW  
GKVERSVGVKIPVDKTLKCRMSFVAGLMTFCFFEHALSILASVGFDCPPSLILKRYVLVS  
HGFIFMGQDYSEWFAMPLV IISTIATLLWNFQDQLIVLISMGLTSRYRRLNECLAKFCELEK  
QHMNSDQKVGAVKVYTWKIREAYVKQAMLVRKIDVALGGIILSCSCNFYFICLQMFLGI  
TQGMSTDFLTGVYYVVS LAWLCIRVLSVLAASGVNTHSKLALNHLYTYETHCYNVEVE  
RLQDRLT KDYIALSGMGFFYLNKTILLQMAGAITYELVLIQFDDQGS DGIALNATNI-

>HassGR6

IGQMFMVAVLCINKLAKTTVSLNGTSPVIFYVTTCVTMLLFFQVARRWPSLVQHISKAEDM  
DPNFDCSLTRKCNITCAVVLLALCEHILLSAFAGASACYSEMDTYQGFVTHFYPPVWFS  
YLPYSVVLGVITQFLHFQSTFIWNFSDLFVICMSYYLTSRLEQVNRKLLAAQG-

>HassGR7

APPDKTLKRRMYFFIGFMIVCSLLEHLSMVVSSIGLDCPPSLIIRYVLISHGFILRHEYS  
WYALPLIFMSTLATLLWNFQDVLIVLISMGLTSRYSRLNQCLAKICALERKQMDSDKNE  
ATKVYAWRKLREAYVKQAMLVRKVDDAIGGIIILSCFCNFYFICLQLFLGITQSQASEPIKT  
AYYFSLGWICFRVICVLAASDINVHSRMLKHIYTHDSHSYNIEMGRLQDQLSKDYVA  
LSGKGFYLSKNILLQMAGAITYELVLIQFDDQGTDDVQP-

>HassGR8

RKIDVALGGIILSCSCNFYFTCLQMFLGITQGMSTDLTGYYMISLAWLCIRVLSVLA

SGVNTHSNLALNHLYTYETHCYNVEVERLQDQLTKDYIALSGMGFFYLNKTILLQMAGAI  
ITYELVLIQFDDQG-

>HassGR9

VRARFSAVNDALALTARQVSIPVEKPKSSSPLNIYAIRVAPVDSQRSANVSLVDTMTGREH  
VVIKRTASGEPRLVVSPCDAVRRLAALHGTLCDVVNSIDDSYGLPLVVILISTLLHLIVTPY  
FLIMEIIVSTNR-

>HassGR10

VVNILDISIRVTDMTQMICDFFQYSVDLFFVYKFGRNLYIEYFRQFEIIDVCLETSCYAEMK  
RRLKTMFFLVIWFISFTDLGAWVITYGWMIPVVHLSYLYLLIKILATLDLIANIIQVEV  
RLRIINNFINKCYNYNASACPVGMLADCIRNKNWLYGEDGSPDQSLKARSIDSHEIKRLSKC  
YLMLTEQVMFINKMYGFRVSTYIDTIIIRSYGSCTTTDDIKQCNCNRNKKFLSFPDIEQDT-

>HassGR11

HFAAIFLWIMNDLVLDVFCNSCERFYLTVEEAQMTCIQLLKNVTCPKSQRHLYKDVLYA  
NRCFTKMTACGLFTIDAMLPISCIGAVGYALVLLQF-

>HassGR12

MLKSQLVNWFNNFIDKDLQSMMLPISLMQNFTFCPKFRIKNNRITPISSVHKFVALVGTIMF  
IYFYVQRVYIQSVGNLKNNFFEYVYTCYYSIGIAMNFIDSVIQSKLYVDFILLIQKVHRL  
NDENHFRLYVISNWLRIIAVYSFFIFILIEVSIWIRLPSYYIASCYPMVAFDLNSVYAI  
SLITLLKDKIILWNLRVSNLQAMQEENEPKKMYQIYINILKCYEYAKCFER-

>HassGR13

ARFLDVESVVKLCQNLQKVDNLRKQFKRYNEQQYYWNIIVLVFIITSFECGFLVHIWYT  
VEYPILAFFAGIGLLNVYMELVLAASLIVYLAIRLKLKITHHNFKIKDYNNTRA  
AVVDEHLLVNSDVKDANIDLANFLICMKE-

>HassGR14

LNIHSDCSISLITLQKVFDLDFSDKIMVITRWNWFAMCIAFGTNI  
SLYMLYYVTYHYFNPVDLVM  
DIMFITFDLNLVYGILVITWLRKFLEKWIEDVLA  
FDDGDAEFYSDYFQIYRNILNAYNLYKTLFQLLVRI-

>HassGR15

IFVILLGLDYLVIQKYDKILFDRETIYYLSICVTGLQTITFLCNIINVR  
FINGDANVELLVNLQQIDRRMNINR  
NKSITLLVKANVISLVVLMFIALLG  
VASAKGTAAFWPYIGIAYSQFSFVIEL-

>HassGR16

ITVPLPYFIQRVEIFIFCGAVYMLKCRVKIINNYLKEFIQKQDKKSVMVFTV  
GKAKPKPDTTLNYIGLPSIRNAKIRDLATAYD-

>HassGR17

NNSSNKVTEMFLENRLDKEVERTAFS  
FNPLNLLFSKYRLKDNRIYPNGIKYGIYALLCTL  
FLGVLCFYRIYTS  
DITNASMSSIERAILTVVPIIFIIYFLGYVIVFVSDIMYKDN  
NVLLILTIQT IHRGISF-

>HassGR18

FSKTIHSFNMW  
SHISFATVILVNLITRATFYLT  
CRYPYVSDLISDIIRDFSFITVDVNMVIATRII  
ILLKQYIDLWIKAILTVNMAQETDLYCQNLFGVYMNILKAYNIYR  
KVFQVLVSF-

>MsexGR1

MNKDNHRFRIYNPHQHERVRKTDASRKS  
DGGKDIKDYEA  
KDVYGPQITAKDGPLLDKHDS  
FYLTTSLLVLFQIMGVMPIMRVSKNAQT  
TKRTTYNWISKATLWAYLVWGLECIIVKVG

KERLANFQNSSNKRFDDEVYNIIFLSILIPHFLPIASWRHGPQVAIFKNMWTHYQLKYLKIT  
GTPIVFPNLYSLTWGLCIFSWALSFGVILSQHYLQDDFELWHSLAYYHIIAMLDGFCSLWYI  
NCNAFGTASRGLAINLHKALES DHPALKLAQYRHLWVDLSHMMQQLGRAYSNMYGIYC  
MVIFFTTTISLYGALSEILEHGLSYKEMGLFVIVAYCMTLLFIICNEAYHASRKVGLFQVRL  
LNVNLGVIDRSTQREVEMFLVAIAKNPPIMNLDGFTNINRELFAANISFMSTYLIVLMQFKL  
TLRQGP RKVIKNLVKAIFNTTTTLAVDYDDEENEE-

>MsexGR2

MMMIPDHLFDEGINNSMFENEMKYVQNKKT VYDRTQRDYEQEQRDLLNSQDGDTC EIH  
DQFYRDHKL LLLVLFRALAVMPITRSRPGTITFSWKSSATMYAICFYIAATAVVLVVG YERL  
MILRSIQRFDDYIYAILFVVFLVPHFWIPFVGWGVANQVAVYKTNWGWKQFVRYRVTGEN  
LQFPNLKTSIVIISVGCLLLAVCFLLSLCALLDGFLLRHTMAYYHIIIMINMNCALWYINCK  
AIKIASQSLAESFRRDVERECSAKLISRYRFLWLNLSELLQSLGNAYARTYSTYCLFMFFNI  
TIAVYGALSEIVDHGFGFSFKEMGLIVDAAYCSTLLFIFADC SHKSTLKVAAAGVQDTLLSID  
VLAVDRPTQKEIDHFIQAIEMNPAVVSLKGYAHVNRELLTSAIRMIAIYLIVLLQFKISLPKE  
PQAAAIV-

>MsexGR3

MTFYTSSSLYTTHAIPNGIPVRMEEKPKNKMIFLDVTPSRTPKASPNAV VPMKNNLIDPHI  
YKDIVYENIKPVFTVLRMLMGVLP LTRPSPGVNVQFKIASPSVVYSLILYIALISYVLYLSLHKV  
QILRTAEGKFEEAVIEYLFTVYLPMLVVP IHWYETKKIAGVLNGWVDFEVAYKDLSGRAL  
SIKLYKKALIIAVIIPILSTG SVIVTHITMVHFKAMQIIPYVFLIILTYILGGYWYLLCETLSVC  
ANVVAEDFQQALRHVGPAGKVAEYRALWLR LSKLARDTGLANSYSFTFVNLYLFLIITLSI  
YGLLSQISEGFGIKDIGLALTAVCSIFLLFFICDEAHYASQNVRTNFQKKLLMVELSWMNTD  
AQTEVNMFLRATERNPSQISLGGFFDVNRTLFKSLTTMVTYLVVLLQFQISIPDESHSWES  
HDNELVSNATSSVTETTTTTVMTTIMTTLAKRKKKN-

>MsexGR4

DEFLPTIANIFKIARIFGISKYGFNLAFMWTLMIFITLISVEVTSFWK FVKVLDGWAEDKFA  
RRGFTERVSGSVFYGNATLSLILSCKFVNSWKRLSRRWRKVEIEGSLRFP PDRWIQWKVTA  
VSAFIGVCALMEHILSMMSAIGLHCAPSQYLRKYILNSHGFLLRINEYSLWFAIPIFILSKIST  
MLWNFQDLMIIVISMGLTSRYNRLNMYVGHIIKIERKLSDSPKVRSDLHVHNEIWRRIRES  
YVRQAELVGMVDKEFGALILLSNINLFFICLQLFLGLNATARGALINKLYYFISLGWMLF  
RACTVVLAASNVMHSHKKALVFLYSCPKSGFNIE-

>MsexGR5

EETCGQKTQSQQINVTKIYAKNKVSDLKNTNEDGNQFLSFQEAMKIMLIYGQCLG LLPVS  
GIFEKDVTKMRYRWFTWKVFYSLAIGFLQGTAAILCVENIINLFTIRGLAHIFFYLITCSCT  
FMFLRVAVKWPSLMKELYNCGLQYYIDPKTKSKCHWACYFILFLAIYIFIICISYLS SILNSII  
KKIDSVYKNNYLPPSFWRSLREDYNRATQLVRSFDD SISGVVFISYANNMFFICLQLYYS LG  
NGLKGRQNYFRTACPNYPSGPFGGYEASIIYITVAFIFSKFLAVSLITSDVHTSSMKAAPA  
LYNIASSMYCEEIQRFLDQVHSDTVALSGFQFFVYV TREIILSVVGTIVTYELVMLQFGS-

>MsexGR6

MGRQNTQKNLAFWVPVKRNKVHPANLKKQTPATFQKSLRATLLIGQAFSLLPVVGIFSND  
ANNVKFIITSWKCFYSFLSFFGQIFIVVMCIIRV VSTEATLNATPIIFYGTTCTFMLMFFRVA  
TAWPDLVQHVAKTEELYPNYDNKLTRTCQITCAV VLLLALSEHILLSLAFAGAIMCFPNKS  
VYEGFARHFYPWFNCLPYSPLLGMITQFLHFQSTFIWNFSDFVICMSYYLTSRLDHV NK  
KLAAAQ GKYLPEIFWKSTREEYCRATQLVRKVDEVISGIVFVSFANNLFFICLQLFNTLED

GIKGNGDCNSRSKKTTPLSGYEAATYFLFSLVYLISRSVAVSLIASQVNTASMPVAPILYDVP  
SPVYCVQEVQRFLDQVNGDKVALSGLQFFSVTRGLLLTVAGTIVTYELVMFQFNSPTADTDT  
TTLIPPNISSATP-

>MsexGR6.2

SQNKLNVSASIIFYTSNCLTTVVFLRIATQWPNLCREISSAETTPNMDTNLMKKCNRSQVI  
VLILALLEHTLADLKGIAVAVDCEPHRPLYEGFIIHSFPWMFSIIPYNTALGFFSHFINLQCTF  
NWNFVDLFIICMSLYLVSRLQVQVNRIVAVKGRYLPPSFWRMREDYNRAAHLVKVDDII  
GSVIFISFASNLFICLQLLHTLADGIKPVPRCRVGVDPKRPLRGYEQAVYFVYSFLFLVARS  
VAVSLTASRVHTASREPAYALYEVSSETYCIEIQRFLDQIHGDTVSLSGLQFFNVKRGLALT  
SMFYY-

>MsexGR8

MSPERMAWSSNSVLREKRLNNGGFYKTIRLTLTSTRFAGVLPISGLTNHSSKLTRYTWKSFYS  
LIYVPRLLLQVLLFSYLLVDLIRGGISIQKLVCKYMGTFIIESITLRLCIKWRTMITEVEAIE  
RKLPPVVKPRKAVFVANLTMFAIQLCWAVCHWLYLMFLAKMTLICYLQDDADSYIKSYL  
LVNYSWLYDQIRFSYFSGLLQVFAQASFISNFITILVAITSMYLRNRFQTFNRIFQRQHK  
RHSKPSWELQMYARLRLACVVNDYIHPFVFTTFWSDLFFISFQTYTTLNKLTLDNFY  
FNKCFESHFRDKESVAFVYFIFSVLKLSLVWFLAAELHETSRKPLNALYTVSSKAYTVE  
MQRLMTQIYRNKICLSGLNLFDIRGTILTITMATILTYELVLLQI-

>MsexGR9.1

MSEDDDFDGLSTKVEGATAESSPSTDHGTDYPSYCIVGGAHAFILRISSLFGLAPLRFKP  
HEKGFVSLSAMCVYSYILVTLVILAVFGMVAEIQVGVFVSVMRMTSRITQVSTGDMLV  
VVVTACAGVYGAPKMRIMLGFMEKVASVDNSIGCQYSGLTERKLCAILLAILFFTVLIA  
DDFCFYALQATKVDREWDMVINYIGFYLLWYVVMILELQFAFTALSVHARFRAVNEALAL  
TARQVAVPVDLPRCPPLNIYAIRVSPVVSQRSANVSLLDVSMPTKESTVIKRVSGEPLVV  
APCEAIRRLAVLYGTLCEVVHSIDDSYGLPLIVIIISTLLHLIITPYFLIMELIVSTNRIHFLVQ  
FLWCGTHMLRMFVLVEPCHYTANEGKRTEGLICRLMTSTPSNGVLPVSRLELFSRQLMLQS  
VNYSMPGMCTLDRPLVASVIGAVTTYLVILIQFQRYGT-

>MsexGR9.2

MSEDDDFDGLSTKVEGAAAESSPSTDHGTDYPSYCIVGGAHAFILRISSLFGLAPLRFKP  
HEKGFVSLSAMCVYSYILVTLVILAVFGMVAEIQVGVFVSVMRMTSRITQVSTGDMLV  
VVVTACAGVYGAPKMRIMLGFMEKVASVDNSIGCQYSGLTERKLCAILLAILFFTVLIA  
DDFCFYALQATKVDREWDMVINYIGFYLLWYVVMILELQFAFTALSVRARFRAVNEALAL  
TARQVAVPVDLPRCPPLNIYAIRVSPVVSQRSANVSLLDVSMPTKESTVIKRVSGEPLAV  
APCEAIRRLAVLYGTLCEVVHSIDDSYGLPLIVIIISTLLHLIITPYFLIMELIVSTNRIHFLVQ  
FLWCGTHMLRMFVLVEPCHYTANEGKRTEGLICRLMTSTPSNGVLPVSRLELFSRQLMLQS  
VNYSMPGMCTLDRPLVASVIGAVTTYLVILIQFQRYGT-

>MsexGR10.1

MFKSKSRPPECVVPKSGVVLRLISQAFGVAPVRLTVKPDGYVVQFSPVSLYGYAIIAFSL  
TSVIALGFDLSVPLGQSVRMRSETRRVVWVVDLAIVTILGIVGGYQAPAHMKSLLIDVNRV  
QKISSELKVSVKSPKTSNDRQYRYVIIALILFTIMIFDCFNIIYITLTKEHRVWVAAMYSCYY  
CSYIITQLLEIQFILLAAAYILSALKLINSRLRNQLKKYNHYLFSPAKGEDAQTIRHLSLSYGA  
VCEIIEKMNKSYSTVLLLIGSFLHLIVTLYIITNIFFKDIEYCMFEKIITPILQVWVCAFHT  
WDLVMVVEPCHRTHEEMERTKELISQFMCTLTLKVSDPMQVELELFCRRLMFSQVKYSP  
HQVCTLTRSILIATVLSITTYLVVIIQL-

>MsexGR10.2

MFKIKKWLPEECVVPKSMGIFLWMSRAFGIAPVRLTVKPDGYVVRFSKSICLYGYAIIFTFS  
LITMLALGFDLAIPLGTTTRPSETRRVMWVIDLAVVTIIAIVGGYQAPAHMKRLIDFVSRVQ  
QITSDLNASSKCPKSSDDRMYYCCVVFALIFLFTILFGDLLSYIYIAIEKEERVWVAVMYSGY  
YCSNVITRLIKVQFMLTATYVLSALRLNSKLNKQKQYDQYHVTSAGESDAQTIRHLSLS  
YGAVCKIIEIDKSYGTVLLLLLGMFLHLIVTLYYIINDIIGIDSTGYDKFETFTKPILQAIW  
CAFHTWNLFMIIEP SHKTHEEVERTKELISQFMCTLRRLQMSDPLQMELEVFGKRLLLDCVA  
YSPHQVLTTRGLVVTIFGSMTTYLVVIIGL-

>MsexGR11A

MLDIKAIKIFLIENILCIYRNYTFYKKKTQKIVLFHVIITLSFCVAVVANDIYVTYEYFRGNL  
STLFLILYHFQFTVYTMLSIVCGISQSSSFEELINTLEKMHNFKDDVYHANSKKMNTNTH  
CILPVVYFIVLTLVLYERMNYVFLDHLIVFDVLQYISEIAMSICYLTQYFVYSLYLTHIYEL  
FKRFYILLNEVKT KLDEKIVAGEKITDNINLKIIIEWAEMYGDLVKISKAFRKCFSGQNFKG  
KGGGV TMMMTMFFDITYHLTAVTTAMLA AQRVQNGVPVLKRILASFYNILTAYPNRPELG  
RIKNFSRMVAQNPLSTA EHRPPLKRATLFGPQLS SVHRRSYEYRRTSGTEVVLR YELYH  
DPESPHLRPPIDPKDFKASNTPKEKIREKSVLEQVHHFFVRMRQFDLLLNGVGSNRMTT  
KDDYPSAVATILPACWNRIYTGCSWNA AHLNSRLMELENQYHFARLGIRFRDLRVASYRA  
FKSSDDYLPPWDGREGVSDFY-

>MsexGR12

MCDIKPINTIIFVENMLCIYRNYIFYSENAKRIRILRITIEIILYA AVTFVDV IILYHHFQKSSET  
VLLIILNNILFLGYSILCMINGMRNSNYFKELIDTFGKLRNCGNDITYNKSLNCLNLTFFV  
ASVTYSVILSVVLTQDKINHEILLIWKIWKYR VISEYLVYYILVTILHIFFKRFNGSLDKT  
QRLNENIIVGDMTDQTNLKIIESTEMYTIPV-

>MsexGR13

MRSISTISKVSPQVKYNNFLYKSITIKQIKYLIYVQCVLGLSRLYLLQSKKICLYTSYLYAFFI  
ILSTLYHESSTIGSPYHTFVLIQGVMCFEYILLVINALLTKKKKMHN YFKNLSQFDQTLKVS  
SDNETLNAKKGSLIWIFIIFYNAIEICMILFKIMNSNEVTEYVNMIFYIISLVHDMEQIFFFT  
LLRTIFTRLKLLRAHVRKTFRVNDAGTSDMKTDKIETLSNNAQLDIGSLHKVYELLHKCSE  
QLNSIMSFPMMLMFTSGFSTLLKILVKIIQVQETMDPKIVTIAVIYLVVRCVKYTLVV  
MPCYYSSITSSQVATIRTTLHDSLNTMPLDKLERRRVKAFLLTKESEFVYALAGFIRLNMT  
LPLSYTSLCTTYLVIIIQFSKFLD-

>MsexGR14

MAPKIYNMIPKIYNSKARSRCYEAIFILLCGYNYNYFDKNMFYKITAKFYCLILV SVMV  
YTTFACRNTQNWP HIWLLLEYVFSAL IILFYRTKMNLFLQKLKLIDMYLRINRHYNWEL  
WKIIGFTIVLWVLRIGHMYLYCAKDWCYDIFSIFLISQFSTIALDVNGVWRCAIFDIIRYRLK  
ILRIRLEESPENNFYLYVNKNKTLKENKIRLMLFIYRTIADVLAMISPELDATVSITFYLEPTL  
LFVCGFLMLHTLQIILFLFTPFLIVEFY SIEVERILLFLIHKVIDETDPGTVDAKLFIKYIQR  
SFRYKIWRILRVNADLPFELINVCVNFVLVLRNFMHLY-

>MsexGR15

MSAYQKMVQLSSYVTVLNIKLWRLACFQYLHTEHFRIIVWPFKLYCVILEIFILYGSYDSF  
TIPFFLNTVQYICISLHSLKTGDEYLYKYILAANTNDVIVGR RTPVFDKEIRFAIIFLIISRFITI  
CISTSKFHSIFLCVQIVILSTRLTGLVLIIFLMLYVRMKYLR RRRFERNTIPVNIHKNGVVSKT  
REMRKCLIIYNNLLDNFSDIDQELQILTWFVFSDESLRFELEIALEYVERRPFNFVICRVFPV  
DISMPISIVTLCITYVIIIQFAEI-

>MsexGR16

MFTYKEKIKSYSKHMILNLIKTWLFCCGHYVVTITAKPLIYVHKVFCIVFAGVVAETIFVK  
GNVSFFILGIEYILSVTLSLMFGHEYLSRFYRAIKINDVMMGIKKESIFDDVIRIILFIFLTVRI  
SLTCLEIYFQSGFEYQMSCVCITVVSSNMICMIISIILYTCYVRMRLRRRFEETIPVNIINEV  
GAMCKVREVRRLQHYHNLLDIMKDIDREFKYLVNIFKPCFSLSVMWQHDTLAKEEHL  
PRSLDIFHDESVRFELQRALQYITIRPFYLLWGAVPLDVTFFVVKLITLCITYVIVALQIVKF  
TGMI-

>MsexGR17

MNSELTKYFTKHLTILKMLKFLRILMGYYNPTNLSQPLVWTARAYSFTIWLITLYSLIKYFF  
VLYVFHIADITLSLYTGDEFFFKYYRATETNDIIIIGNKLSVFNIGIKFIILVTIAFRLLLTCLKIR  
HFKSHTNFNLNFFTINFVIIASRLTCLLVTTVLVVLVYVRMKYLRQRMERNTVPVNIISKNFIL  
SKVREVRRLCLLYNTLLDSVADIDRELQCSVNIYILTRLNLTCLGYENHLQMFT-

>MsexGR18

MSSFKAVDIWIYKNVSILGLIKVLKFITAHYFYTGSCKFVKCVYLLYCVLVCVVSAYGAFP  
LIPFRSIEYVLSVIISLLTADDYIFRYFRSLETLDVVMGIKRSIFNKNVRCVAYMTLFRILFL  
FIHYSGEDDEVYLLSYNIPLLNQRIDSFVSVVIFYTLLVRMKILRVRFERNPIVINVKNNV  
MNNINEVRRCLLDYNNLLDNFHDIEEELQYLMAMIIIFCMPKLITLDVELIGSVLLETWDFS  
KLMLQIEVTQGFILVCLPAVIADLLRHEVAKIKKTLRQAISCSDESRLYELELALDYVTRR  
PFNFVLFVAVPLNMDVPVGIISTCITFIIVTIQFTHFNNI-

>MsexGR19

MLRKVNNLKFTEEVKISKPITMIMKIIHILYSLDMGGFNIKTKKVKRITKVLSLAKCLIVGII  
TVVTMYMSHKNVTSSMYVQIGHNVIATLTFAYFDSGMTYCDYQKILLKFDALRINRKK  
QYLDIKMFIFAITGVALRSLFVYCSFFDASCVRPLLARQLSIFLISFDLILIVYFFIFYTTY  
WRLSNIVSIIDNSSTSIVFLQYLYKGLIDAIQTAKSAFDVVVSYINLLAFARGFARVKVFSRI  
KFHYKNTYSDIKRFISYVEARPFKLRACRIPLDTSPLVHALNIFITYLIIIVQFTHLF-

>MsexGR20

MFEKMTTKERKLKSLDLQKTTVSKAMFIFVLIHVIFCLDFGFIRFKSSKAKLVFKALTFL  
SAVIVSTCFISFYLLSSDIHTHITSSMHLRYIIVFILLSFRNDSTLFDLQETLNIINSKYGYTSF  
KLDIKIILCTLSIFMFDTVLAIMKYTLIDPNCEILKPLSLLIIVPIAIDFVLIVYFFLFYSVFCH  
LRVFSLHLPKSDIVVSQTVYKEFVDITEKTRKVFDACCSQIKFRILSFVIKMAILTFAPVLA  
CEKLAFAQAEDIKAILHDRLLLEEKNECNVYIKRFINYVAARPIASRALKIVPLNFSLLIILQL  
CIDYIITIQFSHLY-

>MsexGR21

MPDQLVCNIDFYSTRFFCGFYHEFQTSTPVRWLARLYCSLICASITFCYNLLVYDHIVLKI  
LACISSMEYILYMLISLLKSNKYLLQYYKKTPLIDISVSTYRLMRVCLVGYICVMFLLTLY  
FTQNLILHEESNVAKYVCALINFIMWFIGIIGRSPLLFFVAFVYTRVRLMPQTLQSNDFDCRI  
LGQQHPRRYIQMYEAIMDGLEAIDGTVKLQTFNFCRRARPRGDPEAVPIPETQPVPVQLV  
ARGAAQRAQSVVFLLLYCHYRYRDFANTNLDYIIQFIYAVYGLIR-

>MsexGR22

MADQLACDINFFYYIRFFFIFYHFKQSSRQIRWLAKCYCCLIVNIIFFNYLKYRIYPKL  
FIYFISVEYLVFISISLLEGNKYLLKYKPKPLIDASASTYGPMRVCLFAYMCLMLLVKLLFI  
IEVSIVHREYTTLEHLNIFGLITWYVIIIIGRSPSLFVFALLYTRVRLMRQTLNNDDFDCRNQ  
GKNHPRRYMQMYEAIMDGLKEYEGPKKLQRDHEEIQKLFQFLESNTLEYCVWRVPLNL  
RSLLSFLSFTITNSIAILQIQDWAA-



>MsexGR23

MADSPVCNMNFYWYTRFVFGFYHEFQTSKPVRWLAACYCCLICASISFFYLYLPSDAFYT  
KKFLFLVSTEYFMYILISFLNTNKHLLQYYKKTSLIDASASTYRQMRLCLVGYLCIMFFIRL  
LGFIVLILREEYNLQQIYFSFIDFIMWLVVLIGRSPLLFFVALLYTRVRLMRQTLENNDFDC  
RIQGNHPRRYIQMYEAIIDRLEANNETVKLQVTNTH-

>MsexGR24

MCLDERDRAEIQKLYQYLKSNPFRYVWVWGAVPLNVHCILSFTSSCITTHAILQINDWVA-

>MsexGR25

MPDQLVCNIKFYLYTRFFLGFYHEFQTSKPVRWLARCYCFLICACVIFCFNFLIYSDLYPQT  
LINLFSMEYSVYMLISLLKNNRNLQYYKKTPLIDASACTYHPMRIRLVGYTCMMFLIRFS  
SFMKVVFINGPYTKNELECWFSLDFDVFVFINIIGRSPLLFFVFLYTRVRLMRQTLESNDF  
DCRILGLHHPRRYIQMYEAIMDGLEASNTDLKLEVIDISPIHGTKARIYRDREEIQKFLFL  
KRNPFEYSLWRVPLNVCSLLSFFSFTVTTHAILQIQTWNI-

>MsexGR26

MPDQLACNIDFYLYIRFFCGFYHEFQTSMPMRWLARLCCLLICASITFCYNLLVYDYIVLKI  
LACISSMEYILYMLISLLKSNKYLLQYYKKTSLIDASVSTYRMLRVCLVGYICVFLMMLSY  
FSRILILHEENNAKCVDALIDFIMWFSMIIGRSPLLFFVFLVYTRVRVMRQTLQSNDFDCR  
ILGQHHPRRYIQMYEAIMDGLEAIDGTVKLQVTDILHICSTRDREEIQKFLFLKRNPFEYS  
LWRVPLNVCSLLSYLSFTVTTHAILQIRTWTT-

>MsexGR27

MPDQLVCNIDFYLYIRFFCGFYHEFQTSNPVRWLTRLYCWLICASITFSYNLLVYDHIVSKT  
LVCISSVEYVLYMLISLLKSNKYLLQYYKKKPLIDASPSTYRQMRVCLVGYNCVMFLTTLS  
YLLIPITLARGEYTGPLYIYGLFYFLTWFIIIGRSPLLFFVALLYTRVRLMRQTLENNDFECD  
ILGKHHPRRYIQMYEAIMDGLEASDGTMKLQVTVTRYFNWLYIYFRRLIFCIDERDREEIQ  
KFLYLYKRNPFEYSVWGVVPLNVRSLLSFFSFIITTHAILQIQTWTT-

>MsexGR28

MADHLACDINFFFYIRFVLGFYHEFQISPRMRRLTRCYCCLVFFVYLILTYSTNPNYHSVVF  
IFVLSSELSFYIVYSLLMADRYLLQYYKKTPLIDEGANYRSIRVSLMIVMCTMTALKILITI  
NLAYKKGLTIYELYGFLKIVAWICIIMGRLPGLFVALLYSRVRLMRLKLENNDFDCRTLG  
QHHPRRYIQMYEAIMDRLEATDGAVNILGGRHYICKHNER-

>MsexGR29

LCVVERDREEIQKLFQFLKNNPFQYNMWRVPLNVRSLLSVLSFTLTTSIAILQIQG-

>MsexGR30

MLFKPLLIQAPLGCARINDFGISIQPLKTWQKIYSICYMILCALAYILYTTNKEGAPTLKSGI  
VEFIFSAQLITNTVVNCAVVIVNLIYTKENVYIFNCLQHIDTKLVVGVKPEHYNAVFNFI  
ICALIFNSFFHVYIIGVKSPLISKWVPLLSHLMIVDDLEMIFVSVVFLMYKRVKYINKI  
LNQFSSTKWRHSTHVNESVFRRMWEAFIATTVRCLNTSSY-

>MsexGR31

MWPRFDGVNKHPLRTLKPLLIQAPLGCARINDFGISIQPLKTWQKIYGISYMILCALAYIL  
YTTNKEGAPTLKSGIVEFIFSAQLIANTVVNCAVVIVNLIYTKENVYIFNCLQNIDTKLK  
VIGKPEHYNAVFNFIICALIFNSFFHVYIIGVKSPLISKWVPLLSHLMIVDDLEMVIFV  
VVFLMYKRIKYINEILNKFSSTKWRHSTHVNESIVFRRMWEAFIATTVRCIEKTSSVYV-

>MsexGR32

MSANDNSKLILIAQIPKDLFFASIKFMLLCRFFCGLYYEMSSSRVVQLLGQLYCVSMLFMR

VTLLISLLPFMNLIPLYLFIFILIVLSVTVSVASLLSKDIYFMEYLSDLEGHAANVTQKTLTSF  
IPFIITLIIFGNVLISHTFSINMVIKPTIIPVSMFTFYAYFYPVIVMLHIHYNEIKELQHKL RVN  
LNEDLIEDEKINAIPSFLNEYRFLFSVGVLSQSARMLCTIYYYLSEELGIEVRFLNGFFDVI  
MSIGITFMPVMLLEMSMHITNDIQRMLSRHLLQYKGPRLREAIYDSL DYIEIHGMKVTLW  
AHFPMDL SFFF SFVSLVTAYAI AVLQFKY-

>MsexGR33

FCSYNVISVREEEVRARSRYRRVKHIEIETDILKYLNISKMLKVISSIKFVLLYRFCLGLYYE  
MGPSKV VQYFGKMYCILLFLKEALYTYDLLINSYSFSILFHLISMILILVPLASV VNKEI  
HFMKYMLELNDHSRDFRENLSIIPFIVTVTGLTYKITMAVFIYTKHTYFMKFLPSFIAMFS  
YYPYYTYIVMYHVLYNEMKVLQRKLRVGLTEDLTEDEKINVIQRFRSSSVPSVIRFLFKT  
LNKPSKTIRITLSFGVVTQWLRMMNMAYYNI SENFQGITDALFGVFYESMVIFLPAILLEM  
SHNVADDFKHILSKQLLQYQDYRLRQSVYDSL DYINTHSMKFSLWFQYSMDISLLIRYATF  
GTFIISLLQFKY-

>MsexGR34

MTREINRVLFARTAFVTKEKVPKEV MLGTQRILDAFADFMNLF EYTVFSFVYQVMVCNLI  
AVQNLISLKPQGIGDIRVFICIVSVLLSMIIMSIYDIYTFGIRLPLNLF AVTASYTTDTRIKKC  
EYVSKDILEEDFVKSFKLLIYIQMTL GSCR VYNKDRFLTSP TIFQKIYTILCIITITLYAVILND  
YSWKYGKTSYLYYLITAVFLVDLITYICNMIQVRFLNGDANIDFFIHLQNM DRLMKIEHNG  
TIWTTLRKINNVS LIYFIAGLFGYLIFAIYKGG LINWSYSSLVNSQLTLMLEIGNCSNFVAHFI  
IRLYIVNYIMCNHLNPNKSKRPKVYLTVTGLKRWIRYTTAKTHNFALNDTEKYLKAIFDG  
FKKFQEIYKFQCVFCFKIVIMSLITFEFVLTGVQNNLLKLA EIITVVMFSVINYLVALVLSVR  
YELFFREVKRTKRLSISMLRQYQEGPLREKAKRMLKMIEESPPSFSVYDMWYMDASIFLK  
MINLVTSLIVTLLQFAFL-

>MsexGR35

MSNIKKSELEKTVDILLNNAIGKDIQSIMRPLNLIQNIYCAPKYRIKDNFIIPNGIYENLISFS  
AVLALLIICVSNIAFSSCPIKILSADLICISDVLNEVISLMGFIINSWVSITQSNNNVQLLLLQ  
TNHRLMEFAERDV SLLKISNWKIVIALYSCSLGVYTS LHMYFHIPYIHTVFFDVI VLCFDM  
NMVYAIFIMKLIVKNLIHWHKEIQKPENALILYKDRMFHLYMNIMLAYKLFKKAQQLLVSS  
SIHDFY-

>MsexGR36

MPDQLVCNINFYLYTRFFVGFYHEFQTSTPMRWLARLYCSLICASITFCYNLLVYDHIMSK  
MLARIISMEYTM SVLISLLKSNKYLLQYYKKTPLIDASP TTYRPMRVCLIGYNCVMFLMTL  
PYFLQISFATCGENIRPKYIFALIDFIVWIIYIIGRSPVLFV FALLYSRVRLMRQTLESNDFDCR  
ILGKHHPRRYIQMYEAIMDGLEACDGTVKLQTN IYRRFFCTDERDREEIQKLF LFLKRNPF  
QYSLWRV VPLKVR SLLSFFSFTVT TIIAILQIQSWNT-

>MsexGR37

GTAANIFKTYVNICEMADPLVCNINFYWYIRFFF GFYHEFLDVSSKPVRWLAKCYCCLICV  
SVIFFYLYIPSDGFYSKYL LYLITTEYFIYVTISFLNTNKSLLQYYKKMPLIDASPSTYKPMR  
VCLVGYLCIMFFIRLSGFIKVLILHGEYNLQQIYFN FIDFIMWL VVLLGRSPLLFMFALLYTR  
VRLMRQTLENNNFDCRN LGKHHPRWYIQMYETIIDMLEEDNDTVKLQYYFYMYIRRLDL  
CVDERDREEIQKLF LFLKRNPF EYSLWRV VPLNVR SLLSLLSFTVT TTSIAIMQIHGWIA-

>MsexGR38

MADQLVCNINFYLYIRFLFGFYHEFQTSKLV RWLARCYCCLICANIIFLSYFHTYKLYPKIF  
IYLLSMEYFMHMLMSLLKSNKYLLQYYKKSPLIDTSVSAYRQMRVCFVRYISV LFFIRLCG

FLKIFICHGELNLHQYIFSMDFIMWVTIVIGRSPLILVFALLYSRVRLMRQILESNDFFDCRN  
QGKHHPLRYVQMFEAIMDRFEASDKYYIHMFISSLTIDERDREVIQKFLFLKRNPFYSL  
WRVVPLNVRSLLSFFSFTVTTHAILQIQSWNA-

>MsexGR39

MPDQLACDINFYLYTRFFVGFYHKFQTSTPVRWRLARLYCWLICASITFCYNLLVYDHIMSK  
MLVWILTMEYIMYELISLLKSNKYLLQYYKKTPLIDASPSNYRPMRCLVGYICIMFLMRL  
YSFINNLILHGERSVADHLYGLIDYIMSGFIIGRSSVLFVFALLYSRVRLMRQTLESNDFFDC  
RILGKHHPRRYIQMYEAIMDGLEACDGTQDREEIPKLFLFLKRNLFQYSLWRVVPLNVRSL  
LSFYSTVTTHAILQIQSWNT-

>MsexGR40

MTDQLACNIDFYLYTRFIFGFYHEFQTYKPVWRWLRGFCGLMSTCIFFYDSFFIRSLNAVFI  
MYLQNIYVLYVLISLLKGNHDLHFYKKTPLIETRATNYTPTRVRLMVYICLMFLIRSGV  
IKTIFIHRDKSVTEHHFAIDFIMWFTMLLGRSPLLFVFALLYSRVVMRQTLESNDFFDCRIL  
SKHHPRQYIQTYEAIMDRLDENTNSMKLQVLHRYDLCPDERDRVEIQKLSQMMRSRPNF  
TLCGVVSLNVRVSVFSISFTLTTFIAILQTKQWST-

>MsexGR41

MNNSQQNTYKTFTPLIWILKIFAINSNVEDARMTLSSIIIRIIVTASILGTLIISFYFKVKYIFSD  
IISIKLTDIAIQMVYDYCYIVDLYFVYKYGRRISAEYFKQYDKLKVLMNSYQTIKKRII  
KLILLFTGLWIVSSSFDMFAWVLSYGWRTPLVYSVAYIYLYIKIATMLDFTSHVIHAEVRLKI  
IGDLVQVHYNDTECSTDIGDCIFNKNWLYANENSSTSKRKLHPDPIKSLPHPGHHEVKS  
TRCYLMLTEQVVVNSMYGLRILLNSLSDIDMVRYTNIGVRIVLKSQDTPYDSGYLPAVS  
NLIRLLTCAAIFVNADHCENVYRKRERITIDHLLIYKSPSKNLSTEASELRALITNRPVYF  
NMANFVCINYSLLASIASIVTTYTMILLQSPN-

>MsexGR42

MPRKKTKTSKNLGLQEVLNNRVDEDIQKLLFPMDLIQRLLIPKYKIRDNFITPNGLWAN  
IINIIFTCIVTMIFLHYTMYTKRIIDVTDVYVQVQVQVQVQVQVQVQVQVQVQVQVQVQVQV  
LLLKIQESHRRLYSEKFQSFVKNWVFCVILVIYQIKEAIIHVLYLNGNMIVTAMTQYLLSS  
IDFNILIAIRWMQFINLKFEVWLKEFRIYTNIKESSYGRKSELMWKRMVHMYSKITKCYN  
LFKKSQYVV-

>MsexGR43

MFIKSKYLNQIHSLEPVENNKVDEDIQSLLAPMRLIQNICLLPKYQMSKKIIPNGFWLNF  
TCVIGTSLTIAVLAFDYIVTDESLNHSTLNVLRKSLFDMIYYAVGLIVCCSVCVFLSKWYV  
LLILKIQEIHRKLYDTRFRFCVRRNWSVIFLVLCYMTFYFLAQLTFYEEGTFLARLIALVN  
FDFNIVTVIRLMKFINMKFDIWIKKFKIYSSIGIYGHNTNKILWTKMYHTYWCVMQSYSL  
VKKLFQYLV-

>MS|comp134624\_c0

GTASRGLAMNLHKALEAHPALKVAQYRHLWVDLSHMMQQLGRAYSNMYGIYCMVIFV  
TTTISLYGALSEILEHGLSYKEMGLFVIVGYCMTLLFIICNEAYHASRKVGLFQVRLN  
LGAVDRSTQREVEMFLVAISKNPIMPNDGFTNINRELFTANVSFMSTYLIVLMQFKLTLLR  
QSARKTIKSVIKAVFNTSTTMLDDDISEDEEEA-

>MS|comp636901\_c0

MRACGLFCVDVCLILHLAELLRTYSIVLLQFAFL-

>MS|comp19407\_c0

CANELPKKLLMVELSWMNTDAQTEVNMFLRATMNPQSISLGGFFNVNRTLFKSLLATM

VTYLVVLLQFQISIPDESQ-

>MS|comp121176\_c0

AILFVIFLVPFWIPFVGWVAHQVAIYKTNWGGKQVRYRVTGENLKFPNLKTTIIVISVG  
CLLLAVCFLLSLCILMDGFLLKHTTA-

>MS|comp1194584\_c0

MGVESAKVEEV TASPVPTESGTRPTRPTHCVVGGAHAFILKISSFFGLAPLRFESRSNGFTV  
S-

>MS|comp82756\_c0

QLLHTLAGGIKATQKCRPDSSDHRLMGGYVHSIYFVFSFAFLVVRSLAVSLTAAKVHAAS  
LEPAHSLYDVSSANYCVEVERFLAQIHGDTVALTGLQFFQVKRGLVLTIA GTIVTYELVLM  
QFTGVSPASTEVS-

>MS|comp1687776\_c0

IYSEERVSSNMVDKDVQSMLLPLNLMSHTMFCPKYRIKDNIISPNSLISKFVSMIAALLSIFT  
F-

>MS|comp109140\_c0

LSLHKVQILRTAEGKFEEAVIEYLFTVYLFPIIAPILWYETR KIANVLNGWVDFEMVYNQL  
SGRTL PVKLYKKALAI AVIIP-

>PxylGRP2a

MLLNFLIYASAFIHADRHRVRLNTVSAAWTELPFVPNSQITNSIRYNIKRRGFLGLAAVTAA  
HILLISTEVESQDTVIVNTLSIFGVFIQYLMIVHFYCLIQLAISILQNTENAAHFMNLKKS  
VLGNNDCWSEDWEGKSGTTLSRLEVNYSKAYVAVAEVNACFQLPALASTVQAFHAMVGEA  
HALYHG VVVVDHVG PQAIIIFCTVLSQVFKIYLLGHIGSILKDEASKIGPALHDIPTDKQD  
LRLMLEIQHFSNQIQFEEMELTVYGYFPLDATLLYNIITAAMMYLIIFVQFSDA-

>PxylGR22

MNDNRFRVYNPNQNEEIRKRDMMGKNGSTDLMGNGSYQAKDLHGPQITAADGYMLDE  
HDSFYLTTKSLLVLFQIMGVMPIMRVSRHAKTTKRTTFNWISKATLWAYLVWSLECIVVVK  
VGRERLETFQNSSNKR FDEVIYNIIFLSILIPHFLPIASWRHGSQVAIFKNMWTHYQLKYL  
KITGTPIVFPNLYSLTWGLCIFS WGLSFAVILSQHYLQDDFELWHSFAYYHIIAMLDGFCSL  
WYINCNAFGTASKGLATNLHKALEADHPALKLAQYRHLWVDLSHMMQQLGRAYSNMY  
GIYCMVIFFTTTISLYGALSEILEHGLSYKEMGLFVIVGYCMTLLFIICNEAYHATR KVGHEF  
QVRLN NVNLGSIDRNTQREVEMFLVAIAKNPPIMNLDGFANINRELF TANISFMSTYLIVLM  
QFKLTLLRQGARKMLKTIVMAVFNSTTTLADDDDEEEEPDVGQ-

>PxylGR22-like

MIPDHMFEDGINNSLLRRDMRHIQQSKTVCEKSLRDYEQEQRDLLSSQDGDTC EIHQDFY  
RDHKLLLVLFRALAVMPITRSPGTITFSWRSSATIYAVCFYIAATAVVLTVGYERIMILRSIR  
RFDDYIYAILFVVFLVPFWIPFVGWVAHQVAIYKTNWGGKQVRYRVTGENLKFPNLR  
TLIVVISVGC LLLAVCFLLSLCALLDGFLLRHTAAYYHIITMINMNCALWYINCKGVKIASQ  
SLAECFRRDVDAECSAGLISRSRYLWLNLSSELLQLLGNAYARTYSTYCLFMFANITIAIYGA  
LSEIVDHGFGFSFKEVGLFVDAAYCSTLLFIFADC SHKSTLMVAAGVQETLLSIDVISVDRA  
TQKEIDHFIQAIEMNPAVVS LKGYANINRELLTSAIAMIAIYLIVLLQFKISLPKDPQVN-

>PxylGR24-like

MSLYSSNAIFPKTEMPIPNGFPPHLNGNRNPKNKMIFLDVKPPRTPNMKSSAPTIRTLKNNL  
TVPQINRDIYENIKPVV TILRVLG VFPVSRPRPGVNL FHLASPSMLYSVIAFFSLVTVYLYLS  
LHKVQILRTAEGKFEEAVIEYLFTVYLFPM TAVPILWYETRKIAGVLNGWVDFEVAYKSL S

GRVLPVKLYKKALIISIIPLLSTASVIITHVTMVHFKLTQIIPYVFLEILTYILGGYWYLLCET  
LSVCANILAEDFQQTLRHIGPAGKVAEYRALWLRLSKLARDTGIANCYTFTFVSLYLFLIIT  
LSIYGLLSQISEGFGIKDIGLALTACCSIFLLFFICDEAHYASHNVRTHFQKKLLMVELSWM  
NTDAQTEVNMFLRATERNPSQISLGGFFTVNRHLFKSLLATMVTYLVVLLQFQISIPDDSQ  
GQLMAPPEVVSNTAQSAAEPLSTTMMTILTTVVSKKKNKSLV-

>PxyGR28b

MPKTKKSTPKKVIKPEIISKQTVLVLQLIGISVFEVYYDKSGKLAKRVSYLGFGLFWLG  
SFGFSAIHACVNDHTILRAYDYDTKLKNYGDAYERITSLYSETVILKVALQVSSCLPFTQYI  
VDIDKTLASRGVKVDYQHKKTFFITLQLIPVVLRAITCATLWDAVAVIPVDRIFQLTLTDG  
VSLMATTFFYCHYLYLLMDRYKHINEILSGVKEEATRKRVIDAATIILENDLNENARRAEDF  
CERIRLSSKVHSMFLKATATVNEVFGMILLVTSLLPLSYIILNMFYFMEATSAGLAHDVKRY  
VNFLLYIAWAVLYNVLVIFMNVYFSESTVSEAKKTNIIVHDILNSEVSSQVKKEARQLSLQL  
LHQTPAFTAWGLITLDYALILEVPTLTSITLLRFNCHCGLLVEALLHNS-

>PxyGR43a-like1

MTVQVQDHHKRPIQRQRGVRQGDVISQKLKTDALDVFKTLDWNGHMSMSHLCYADDI  
VNMAECLPELSWMLMLITYTGLLYDLSVGPARGVVRVQSNMSLVVWACDLSCIAAAACLAG  
AATAPARVKQMLVVIREVDSINAALNSDLNERGERKKKALCVLIVAALLLFFVLDFRHMT  
EEAYNEGREWRSFFYLSFYCLYIIMFILELQFVLAVAHVNCALRAVNDALARELRDMEYIE  
LKPPTSNAIHIRLSQLHGAAAAAARALDRGWGPVFLITANLVHLVETPYVITDMFQI  
NGVEPTFLMIQLMWCFTHTINMYGVIEPCHTTVEMSETRELVSQLRRADSPSDALRRQ  
LALFAEQLMLSRAEYAPLGVVTLHRPLIATVSL-

>PxyGR43a-like2

MQQLLVGGPMLMHFEDSKSMKITVIGIDPVKEGAAVPRARSVEKGTCVVDGAHAFILR  
VVSTCDVLVVAATAGAGVYGAPARMRSMLRYMESVASLDVSLGAQYSSVSERKLCVLL  
SVLFLFSVLIVDDFCFYARQASRFDRTDVVTNYIGFYLLWFVVILELQFAFTALSVRAR  
FRAVNDALAHATASCVAVPLEKVKEAHHMNMFAIRVAPADSTRPTNVSLVDSMSPQDHTV  
IIRNAVSGEPRLAVPPCEAVRRLGALHGSLCEVIQRVDCSYALPLVVILISTLLHLVTPYFLI  
MEIIVSTNRVHFLVLQFLWCAMHMLRMFVVVEPCHYTITEGKRTEELVCRMLTHAPSTGV  
LPSRLELFSRQLMLRSVQYSPLGMCILDRPLVASVIGAVTTYLVILIQFQRYDN-

>PxyGR64a-like

MNEIGKVFEGDKESGPHQNDKNKFKKQAHNSVRVDDVDFIRTMHVSFSAARCFGVPV  
CGGGAARAWAALLLALHVCIEGGSVYKLVKNLAGLTAYSTGNRSVVARLSGAIIFYGNALL  
SLVFWRLRAAWARLLRDWAGAERGGALPLPPDKALRRNLWLVAVAVCSCVEHGMS  
MAANINLDYPPPIVFKEYILNSHAFLIIPSDYSLPLGIAIFVSKAATILWNFQDMVILVSLGL  
ASRYGRLNKYVHHLTKMESISGHTGSENDSCMDEYASLQSWRRVREAFVCCQAALSCMDE  
YASLQAWRRVREAFVRQAALVRRADAELGSLILLSNSNNFYFICLQVFNGAGGEDGMSLN  
KVYYLTSVAWLCARACAVLAAAENVRSRTALGFYIYEPDRSYNVEVQRLEKQLTKDV  
VALSGKGGFFYLNRGILLEVVSSIKEYELVLEFDKK-

>PxyGR64e-like

MHAHKTYDVIGYVFFYSSVFNNSIMFCRISVKWPALAAVEETEEADPLKDPVTSRCN  
RAVVVIATLALTEHLLMWISKVARLSDCYPEPRRSYQTFIHSNYPFVFEGLPFSPLAFAL  
QYVTFITMNWNYSDFIICISYYLRARFHQLNNKINDAKGKYVGAWFWRRARSEYTRL  
VELVHRVDDVISPVVFSFASNLFFICFQLYYSIAIFFGYERETLVFSVTLLLLSVAVSLIA  
AGVHTATLEPAAALYSVPSPVFCIEVQRFDIQVHGSIVALTGLRLFNVTRGLFLSVAGTVVT

YELVLFQFSAAADRHHGDPGDDNSTFFVPHMD-

>Pxy1GR64f-like1

MERVAGRAAARGASFQESLRVLAIGQLFAVMPIYGVSSRHSEEVKFVKVSWKCVYTAL  
MLSGQLFMTLTCVIEVFYADDVMQSITSTVFYGTACLTMVAFAQTARRWPALLRFIGRVEE  
VDPASDGRLVWRCNVTCVILSMSFLEHLLSILSDVYWANACSPSPVDTQEEFYRLLYPWI  
FRSLPYNPLLAVMCQIFHIQATFTWNFSDLFVICISYYLIRRLQLVNNKLLHAICGKKYGESF  
WRSTREQYGRATQLVRRVDRVISGVVVFISFANNLFFICLQLFHTLETGKRGKSVCLHPVPE  
VQPVAGFITTLYFSFLVYLLTRSVSMSLIAAQVHTASTVPAPVLYNVSSSEYCEEVQRFVS  
QVNGEKVALSGLQFFSVTRGLLLTVAGTIVTYELVMFQINSPGSRNYVTPGPPTVTNISSVF  
ST-

>Pxy1GR64f-like2

MGQKNKKNVSWIPTKKNRVSVPAVKPAAAVATLQAALRTLLVGQAFSLIPVQGVAASTA  
KNVKFEKSKWKCVYSFLLGQIFITVMCFYKIVYSDSSLKATTSVIFYGTTTCITMVMFYQ  
VARVWPRLAHFVARTEQLDPSLDQRLARRCNATCAVVLTLALMEHILLSLQAFAGAAHCF  
PDAPVYEGFVRHFYPWVFNFLPYSPYLGIMTQFLHFQSTFIWNFSDLFVICMSYYLTSRLD  
LVNQKLLNAQGKYLPELFWRSTREEYGRATQLVRKVDEAISGVVFMFANNLFFVCFQLF  
NTLENGFKGRVECSGTTSSSTTGAGPGKGYEAAAYFLFSLVYLISRSVAVSLVAAQVHSAS  
AVPAPVLYDVSPVYCIQEVQRFLDQVNGDHVALSGLQFFSVTRGLLLTVAGTIVTYELVMV  
QFNAPSSASPASATAATLLNLNESSTLMP-

>Pxy1GR64f-like3

MFERLRRKSTQIVMAKNVVLEKKLQILSDEGGVQGFHRLRLTMLAPRLLGMLPLCGLT  
CPDSSQLRFRLLISPYLPFIFALFGQLFMITCNLYRMFDIGCSLGTITNCLFYASGCFSTIFMIR  
IGQRWPDTVQFIEAVERRLPPLPSQVTRQCNGIMIFVLTAALVEHVLCVYLYKEASACHD  
GDIWRKYFTDNIPWIYNYIPYSPWKAVVTEMFNIHSTFMWSFNDALVMVCSIYLTTHFLN  
HNRLLENVMGQETFHLKEFRIQYKNMMNLVNIINKEIGVVIVISFFCNLYWICMQLFNSLN  
KSDNSDNDFPSVECCQRSIANKSSLEHNMYFAFSFTFLVKALLVSFLGARIHSNSLVPLSM  
LFEVSSSNYDIEVQRVIDQVKHSHVAISGLDFFHVTRQMILTLVATIVTYELVLLQLNDSIIT  
ADGNATTTTVKPLSV-

>Pxy1GR64f-like4

MLVFSNLNYKNDKYAFTYSVYALAWLSVRCFSLVAASDVHARSRAGADYFKNIQTTSYN  
TEVRRLQFQLSKNEIALSGMGFFKLKRSLLKVLVSVIITYDLILLQYNDNL-

>Pxy1GR68a-like

MVKNTFNSTNSDLGEIFKPMYILLSIVGLFPYSITFNKSKKQFTTQPNSLYFNLLPAVTGAT  
TSCVFFCLHLHHVSQAGLEGNLSEAVVTTNYCTELVLSLLCCVAPYCCSVLRRRAPAAM  
LDRVAAAWAAPFHLASTILPQLQHNINISVAAVVFHLIVHTVIIGALNTDLWKKVLLIFSF  
NFPHFQCVFVAYLNMALLIVSVLQNIQRETVAVHAKESAALGLRKAMSAPLNVRHLEET  
YSEAHRALAELNRCYQGPILFTLLQCFHSILSNSHIYYGIMMQKDFNVLDGIDCGVWVW  
QILKIYVLGRAGSLLNIESRRIGETLHDLVVDKLESRTLLEIQHFSTQIRFKKMILTVYGYFP  
VDSTLLFNMVTAAMMYLLLVQFDIPENNPSELH-

>TcasGRa

MCQIKNLLLLDSSTQPNYLILSNKNNTYLVLNKYLLVKHSPKMPLLPKTLPPLTLLYKL  
LGIIQFPISAHFSFMSRFLCLPFYSYFFYLSYIYTTYSRKLSGIFKYIDQMAGYTGFLAMLTS  
MVMFYKRSNDLKTLLSNLESIQIYSIKPKERNNSNHWRSGLFALITGNVLFYPPLPSDVSY  
NLFSFVPLVVALDHLFLNDILSDICDKFEQINQHFRRQIKSVDLFVIFPLTKAEKVRNLKE

DEVTFSVQKIQELSHLHYKLANFTVKISGLFEITTTITAMVMWFGYVIDTMYLFIHIRSRQED  
TDTLVVIYTFNLFYLCFCFYWLLVMVAMFSRTQQSANKTATFVHEIWNKYALKNEVDKRV  
RHLQLVAIRLLNNTKLQFTAKDFFNLDWTFCHMVSHKWLNYINQFEANFR-

>TcasGRb

MHTLQHFTIDTRSTHSMKNFKYLKVLVTFAHFICLFPITINIRKNGLNYNFTKCCYFLRMV  
LIDLLIVGCILKHIFNILMKNVTLNDVVFIFCSAPIIITILDIEILGYVNKAKFGKLLINLYTINY  
NFKESERNDYVSLQLVVFVFCYFIYLFVYIYYSVHEASIINFGYTALAKFMIFTSTCIYTNL  
LRIIEADFSKLNHLLSGTENLDLVLPIYSQVFMCKKINKLYGHQLLLTIYLIWTIYEMYH  
LAILWSCTSTNCPFLMLALS YTVIQEVMLFTILWNCQNTRVASEDFKAIWYSILIKKADS  
FCKKKLENYSLQLINHRVFTAMGLYVLNMEHFFSVKCSIQSESLNDILFPVAGFISDFDC  
DINSIQYFCLMARCLNTLIFYHISTYEYSI-

>TcasGRc

MSEREVILKAALTSRFFLITIYVSNLLIPDHEADAYTYPKNEDNGIFDKLVTHLLGGFVVRW  
DAHFMHIAIFGYTYEHTLAFFPLFPYSAKPVVAILS YLLPFLSTDSLTLITLITVNIFCFAQS  
ALCLYQLSALIMNKDLALKAAILFCCNPASVFFTAPYSESLFCYLTFSKMLNSVLLYKKYK  
NQGYLLSDVAYIPICLSTCTRSNGVLNIGFLAYALICLFLEKIKLEKQICNLLLCLAKFITLA  
AVLVLICLPFICFQFYGYQTFCKNFKSYQVPLVLGHKNIDNFVLPGTFSQHNQSWCYKK  
MPLAYSYIQSHYWKVGFQYYELKQIPNLLASPIILILGHSLHFLKEFPKSISKLFNFDLIS  
VKSVRTKKFFPVMVAFIVHASVLTLCVFNHIVQVTRMLCSASPVIYWFCSYYVTDVNL  
FKNLIARKCNWGELLVLSYFLGYFVGTVMFCNPLPW-

>TcasGR1

MRNDHGSNTHLHPDDAIRRAKIVKVAASPTSANPDEEPDPELLDRYDNFYQTTKSLLVLF  
QIMGVMPIERSGKGRITFRWLSSTSIYAYFIFGAETIFVTMVFKERLYLILRPGKRFDEYIYG  
IIFLSILIPHLLPVAAWTNGTEVAKFKNMWTRFQLKYYQVTGTPHFNLTILITYSLCVISW  
AVGIGIMLAQYYLQADMILLWHTFGYYHILAMLNCLCSLWFINCTAKGRVAVWMCNNLH  
KALESRNPAKILGAYRDLWVDLSHMMQQLGKAYSGMYSMYCLLILLTTIVASYGSVTEIM  
DQGISFKEAGLFMIAFYCMTLLYIICNEGHHATRKMGPFRERLLNVNLSAVDQKTRQEV  
HMFLMAIEKNPPIMNNGYANVNRKLISNLNERNCFNSNIVKLRTLSPTQT-

>TcasGR2

MEISDLAQLYGNELHIKQISKWLRGSARAQEIQRSELDKDGHVIDEHDQFFRDHKLLLV  
LFRVLGVMPIQRGEIGRITFGWTSIPMLYAYVFYVVTTLVVLVGYERFDILLNKSCKFDEY  
IYSIIFIYLIPHFFIPFVGWGVAYEVCDYKNSWGGFQLHYYKITGKNLQFPLLSTLIIISLGC  
LILAVVFLTLALSALLEGFTLYHTTAYLHIITMINMNCALWYINCRAVGNASTALAESFQNDV  
DRNCSAYIIAHYRVLWLSLSDLLQKMGNAARTYSTYSLFMMANITVAVYGFTSEIVDHGI  
RFSFKEIGLLVDSTYCLFLLVFCDCSHQASLNIARRVQVTLLQVNLSQVDPATRKEIDIFLV  
AIQMNPVKVSLKGYTVVNRELVTASVATIAIYLIVLLQFKISLLNMRG-

>TcasGR3

MPKTHRSIPKSALNSNAAGWGCLPSSSAFSAAGMKSAGCGSAQSMGKRLDTHLGLVRLSR  
RWPTKNTDTTHAIQFSSALSWPQADASHPRPGCVTSRLSRTL LLLLLLGS AQRRRQRRVWT  
TPRRPKAAGEELGVVSTINSSTMYHQDQAVSILGEAIPKRRSVFLESGVNSADSFKASKVG  
PAPPIKFINKSSTDKFGNGAIYEVLPKIYALMRIVGIFPIKNTEPGMFRVAPELLGYSVVV  
VVMGYIGFIEWDKVEIVRSQEGRFEEAVIDYLFVYLLPIIINPLVLYEARKLANVVTDWV  
NFERIYYKLTKKKLSVFFGNKPVILT VVPLLACGVMVVTHITMAHFIIQVVPYCYINCLI  
YLIGGFWMQCDVVGKVASQLAEDFQMALKHVGPSSQVADYRSLWMLLSKLIRDVGN

SGYTVTFLCLYLFLIITLTIYGLLSQLQAGFSTKDIGLTINAGLAIFILYFICDEAHYASNCLRV  
QFQKLLLVELSWMNDEAQQEINMFLKATEMSPTDISLVGFFDVNRNLFKSLLATMVTYL  
VVLLQFQISIPPEASPTNSTTITTQTPN-

>TcasGR5

MSLKLVLNLFVKIGSLLALTPAKIEKNGLVFPTKAYSLWAVLFSGALSITAFRKASYEKLSP  
VVLFIQVAADTVLFILNISTIIITARKKQQWNSLIKILKTVSNRNDKGDIFWFSPFLVANLAF  
VTIVTYETVWWTQIMGAEFFKLYAVEYFQMYAQFIVYYLIYVFLNSILEGFQHLSKTMCKY  
LKLPNRSNNFSLKKIRSEFCALAI FVDVFNDFIGWLILQSIGFTFLQLLSYMQHLIVGTGHTI  
PTLIYRLSFITWYMGVGFNSVFICDLIEQKVKNIQMLVYQNEAEEVKILLDVINHFPHTAA  
RFFDLNRKTI LGVLNALFTFLIVVVQFENLTS-

>TcasGR5a-trehalose-like

MTEFWLEMRRDYDRLSHLCKELDDGISGLILMSFAYNLFEVISYLFHQLMMDSSQQNVAFY  
FFFPYMVLRLAVCLYTSWINDESLAPVNILNSVPSRNYNPEIGRWLVQMSFDNVALTGW  
KMFKVTRGIFLGVASIVVTYELVIMQFYGFSGKT-

>TcasGR12

MKKNSKYVQNCIFYAMKRPLLVAQIFGYFPLYGTNSDPTCLKFKWISFKTTYSVFTLFVTF  
FIAVCQLHKMIAVEMNILQMNYFVFLLC SILVNIAFIKLATEWPQLMKAWLKIPELLVGNLG  
MRRNFRKKLDFIFTFITLLTIVEHLLMELSRADSVACSKTVSDGIRHYVNVTFPHLFNGL  
VDYSLWKALIFQISNLQTTFFGGTFGDTFIILLSMAFATRMKQSRKIEALVKSHVKATTPWR  
KIREEQCSLLYLCTLLEQKISYLVLLSFCNSLYFVLVQLFSALKQMMDTLQKTYFFISFGILIF  
RIIFVLSAASINEESRKILILLSTPSELYSVEVERLTNQINYKAMAISGKNFFIITRGLILKIA  
GAVVTYELVLIQFNKLLNEFDETSVQQLEILHNNTYWLC-

>TcasGR26

MANCATA TLVCWGFVGFVHDMEIASFVSLGFTGSVDVVISSFDISDVLLSCLYFIVSMPF  
KCAKLSIVFHNLNKVD AITPVFCDRFYSNLVWFSRCWFVFLPVLYTLDVFMWGN TSWLG  
VNNYFAYVYSIVVLHELQYYQVVKMAQLRVSGINKTVKENIKKDTSRIKLEFIFDLIHC  
YNNTTDAIETINSSFNKTVTLMLFSCYVHLVTCOPYQLFVMITSNETSILNYVYCLWVLLQIF  
RLVLVVEVCHNCEEEIQNTRILVSQLLNCRLDKNVKKEANTFLFLMVKKKIKFSAYGLPK  
VGRHLLSVASSIGGYWMILLQFSSRTSKI-

>TcasGR27

MQVASFTALGFRGTADFVIACFDVNDVIVSAIFFVTSTPFKFKHFVQIVENFDRIDARISPIL  
VEQIRKRSNIFVKVLVTLPTLYVLDLFMWGKNNWEGLNNYFAFYIMYSIVVHELQYW  
HIMTMMYARILGLNKTLRDYFKNKTGFCEHEILVVTQSFNSINDSVEEINKCFYSTTTIIFS  
CYIHLVISPYQLFVVVSSSTETSLFNYYVLLWISLHIMRVLTIVEVCQKCEENRKRTRSLVYQ  
LLLCKLNEKVKNMVRVLFLLVTRKILFSAYALPKINRRLIISILSSISTYWMILMQSTSRTIQ  
VV-

>TcasGR-SG43a

MTITISKELFHVLSPVLYLSRFFCLQPLKWKTKTSAGNYIITKSRFYTIYTLAASCLLVITSITG  
LSQVYQLDVIYLVRLGDTTRRFV TYSDIVVLLPCVIGPVFALFKTNQTINYLSHLKQFDSL  
QNQPTKSTKIFQITALTTFTAFTLSMDLFLWLKLSHNYIFLLCLPYYISYWSTVVIELFW  
HFVHLIQIRISVINKKLAKMVVTGLNSVTTLKKPHA EVEDLVKGYEKLIEATNSINYCYGF  
PILVILGCLIHLLVTPYGLYSIIMSTGDSTSILSQTVMWTAHILRLFLIIEPCHECFIKTKETSQ  
LICKLLCLSVNQEVKKSLEFFLTYLGECKIEFSVYGFTKINRELLTIAGAITTYLVILFQFK-

>TcasGR-SG64b



MNILQMNYFVFLCSILVNIAFIKLATEWPQLMKAWLKIELLVGNLGMRRNFRKKLDFIFT  
FITLLTIVEHLLMELSRRAIDSVACSKTVSDGIRHYVNVTFPHLFNGLVDYSLWKALIFQISN  
LQTTFFGGTFGDTFIILLSMAFATRMKQSRKIEALVKSHVKATTPWRKIREEQCSLLYLCTL  
LEQKISYLVLLSFCNSLYFVLVQLFSALKQMGDTLQKTYFFISFGILIFRIIFVLSAASINEES  
RKILILLSTPSELYSVEVERLTNQINYKAMASGKNFFIITRGLILKVS NKH-

>TcasGR-SG64e

MTTTHSSLRFILIAAQIFGMFPVSGVAKKDPFLKFKWTSKRTIYSIIFALAAVVNTIIFLVH  
RVSLGRLKFADWVTLVFFSVTFLIVVLLLQIAKHWP SLMKKWTQVDEAMSGYGFPPKLE  
RKLRIIFAITVVASLVEHGLFIGVEYMSCRGNLSEALDRFLMFHYDYVFALVPYHVVLGII  
LEIVNIFSTISWTFMDLFIILVSL SARFKQVAKYIKFLVERNVLNKNWQRARQDYTRLT  
NLCKDLDEVMSSTILLSFGNNIFILVHLYNSLQKPLEFGYLDEIYYLYSFICLLVRISAVAH  
AATINTESKRPIYLLSTIPHRYNLEIDRLLLYTKYETAALTGYKLFTRITRILKITLAIVIYE  
LVLVEYLKVESY-

>TcasGR-SG64f

MKNIISHNTENTIHSSLKFSLKILHIFGLFPVSGLSGPDYKSLKFSWRSFKFLYSLCFFCILCL  
FVLTLLYNVFFVKEATQEITNVLFYLSAAATNAVFLQLAKNWSRFIHEWHCVEVIMGSVAI  
NHSLKKRLKIITIVILVAVTEHLLIQCYIAVSIFGSSSFEADLRQFYKTAYS AIFTVIDFSLCK  
AILVHAITIRSTFSWTFIDVFIMLTSTAFVFR LKQLNAKVEMLNARVKNTALWKQLRYEH  
YRLYQLSVLIDNNMSYIIIVSFATNLYFIIIQLFGSMKIVKGTLKTAYYLISFALLIMRLISVCL  
CGASVHSESSKVLPLLFVSSSSYNCEVERFIDQVIKNEIILT GKKFFKITKQLILQIAGAVT  
YELVVIQFNLRLTEDNDSNEANLLA-

>TcasGR82

MPTRGTISPFHRFVIHLCNVFSEILSCTQILFFMVLTSFMIHHMLRVNIAIAIVEMVVKPNTT  
TPTEENFGPKYAWNEREKNDLFAWFFWGFLITQIPGGRFSEIVGSRIVLGLGILVASVATLLL  
PLCCNVHYLVVAVSRFCVGLGLGVHWP AIPPIAIRWSSSATARTMFMTHLFAAGSLGAAIVL  
PVSGLHIAVVGWPSVIFYVTGGMGVLWSVMWFYLIYDSPGQHPRISAKEKEILEQKIRNEIT  
PQVRHIPWIKIFTSLPVVAIVVANASICFGFYIIFNHLPTYMSSVHNVEIEKNGWISSLPHLG  
EFFREKFVISAYFISGRYITTVAVSYLGARMLHKNKFSTLTIRKFLSVVCSWSAVLLFGMEA  
LFGYHYYVTNFVSITFFLFLSLSIPGMIVNILDISP AFSGTIIGFNQVIVCLSGITS AKVVAFFT  
ATKQSFEQWRYVFIIVAIVNFVGGFLIFASADVQSWNPKENVSQKKN TLLNDTTSKDHE  
EF-

>TcasGR87

MKEVPGWRNMKPLYL CNFLAVTPPHSLGNTVTPVSLRFKLYTIVHIFIIIALYAHSSYGRE  
NFIYGSMNMTVAITDKIANFMLTFFNVSLRIILVFSKGVKVSFFNQGYELSKQEIFNCCSKK  
SFRMNFAIFNLYMVLLLLFDAYLWISSVGVRMFQYYIGRSFTYYVCNTTIFLIFHSVLPIKR  
FFTSLGIAFDNIMKNLICEIDGRHEFFLAEFKSAKTPPNKLN CYDLRRVRKNYNSICELVDA  
FNNIYGLAMLEIIIVVITYVLNLTDLFLVYGMSKSRNIEGVSFGTNLVILCALWITLLLFTIL  
LAYGCAGATSEAEKIAKICFYWLNEIPTMPVSIKDQTIKEELALLAQQSTSRTSKFS AAGFF  
PVDFTLLGFIFGSVTSYIIISIQFIE-

>TcasGR93a-bitter-like

MVTKMVCQFSRNDLLRNSVSKPLFWYLIVQVAITGNKILGAVLTISPDAEVYLNVLVFNF  
AELFSYNINILIFFYLIIFQNAYTSYFKAITRKNTYNDPKIVVQIFYKFYEISNNINETLQVPIL  
LRIFTDFVFTISSMFYLSVFLYIPEL SFFVLAKMVLWLVN TLFAIFIMAYFFDQMTEKRNTI  
METLEDLPSSHTLISKFHSSYKRKELLRLRLKHERFCFNVC GFFPLNNSFIYLMIAGIVTYT

TYLVQFGKAANAKQ-

>TcasGR97

MKNHFSKLMKNRRGRKTSKMMNGMTKQIQDVMPPGNRLKISLTLFAELTMSSQSLHSTL  
ETLCFLNQLIGAPFSQTRHKLYPTYCKILLFTHLTTLLFTFCNIWWRCSNSQRISTKLIKTLN  
YFFKVTIIMSTILNSMILKKKNVAQLIPTLKEAKVMLPDVKQKWSCFTHFDSIFVLFSIMTS  
FIFHLTYKSGCYLIQDLLDDVEMVQSLIVLLTSLKFLELLSNYFDQTNNYFDIILKSEIFISD  
MKMRRVNQLYRTLRYRILELWNNIYGVFLQLFLHIMVVLIDNLLSLVEEFKLGYSFSWKV  
VIRSQTIAIYLVLALLSKIGYQISEKKYKTSKTVLNGLVEITLRGGKQSQLNLLLKLKTW  
PNFVSASGYFRLDYGFFLSLLAAVVSIVILLQLS-

>TcasGR117

MCLAIIIMNNKLNMLVVKSMQLRIKMEEKLVEKFLNSLQIYLQHNQIFGFVTFTCTRSNF  
RSSKLLILYNILQVLFVSFVSYWLYLVLEADDMLPIYKNTYLILFADFAYLETTWICTLLK  
KDKLLELFKRLIHFDTKCQENSTVIDYKRHKRLLCYLLARYVALALVILFSEILVIVSEQE  
WSFSTGLLVMIENSALSYSKASEIVMLRSRFAILNKQIRFLNQYLRLKPEGRISNRRVFISFS  
KICYLHQHLSKSVKLFNEVFGVSLVLVFGNSFLSIVLALFRTAELQASQIKWTRIAMAL  
ASVPIFDSIHLCDVCYSTIGTVSKAGELIHQIQTEDHDIIDEIEMFSLQIANEQVEFNAAGFF  
PINYTLVFSIIGGATTYIIILIQLSATLNE-

>TcasGR118

MRNVPSYCFVTILFDSVNKLGTVQIVNPYSVKQYVMQQQVKNFRHSVRSVFFLSEIFGLV  
NLKYRETYFRLSKTKTCTLVLTALVYCSLAIFVLCELLIEGTTILINVPSLIIHVSTSAVAT  
VWINSVINRWKFIEFIRKVFLEFDVKCVSNYTKQQSKIHLIVRSVFTTYLMFDYCTVLRVQ  
RFNNYQSLAHYLRVFFTVFNVVHCYLASELVLMKRNRFVTLNVQLTKLTKNCATKAQSV  
VLGRICLHHHLSKLVTRFNEIFGLGLLLMFGVSFLLITQTIFIICVIVQSEQIAWLHLLYIFLV  
GIMYAADVFIYCHVCCSTIHEVSKAGELIHKIETNDHEIIDKIEMFSLQILNERAGFSAAGFF  
PIDYSLVFSFLGGVTTYIIILLQLSSVPPV-

>TcasGR125

MKKNLYTVEISYDLEEGVKTACTCPRGNVACHHMAAALYAHYNVSATDIECQWSAPS  
KTPPQTEVIKLADVYKPKLSNYTALSRSSTEDIEIQFRAEIGVTNVVGFTWLLRPEASEEAR  
KIIADIEILQSLEYVQAIDKQKFLLEKCRIDEARIKLVACTRGQHVNNWHVARKHRLTA  
SRFGMVLSACSRRRFPFSLFKNLAEGYSLDRVAAVQWGKTHEKTALREFEATNLKVQET  
GFWLEESGFLGASPDGLVEEDGILEIKCPYKYRDTDSLSEALKDKKYFYWRDENEDINLN  
SNHNYYHQVQGMHITGRINVKSSSNMIKFSKVKS YFTTHHDTLHNIY TSMKPVYAICKL  
IGLNTLRIGRKGELKQHKSDYFYFSFYITSYTLLSVYSLFRIATNENNSLVINKRLIFIECFVM  
MALTIVTLFTFLARGTLIKSFDMLSHVDVSIKAGFRLEYKQLLKRSYLIISFVLFSLARV  
PVMLMTISADFIQQIMLFVSALIKAFSKYQFVVLVLQLQHRFGKINRTMRSFFSDNKQDDK  
IPQISDNLYILCRLHYKLTSMQKINSAFSVQLLVSIGVSLFDVLFQAYYLYYVATGKASFV  
TVPMIVCPIVWLMDEVVEIYLLVYACASTCEQANDTPSILHELNNYFHMDLENNVQSYS  
LQLLHQKVQFSVLGFFVVDYTLISIVGAVTTYLVIFIQFDQSSNSRNYYVLTNNSTC

>TcasGR153

MTIITRSNNVVGKFKYKRNKVSNGFLTFFEFIFGIIILYTTYSMSFVKRNHVRDVVLQLNRI  
DELLAKMKQKFRYTRAVWYQLIIFSGFLMILIIASMQIQNIRIENFPPLSLFMCIIIFLPLVIL  
YDLNSQYGFTAILIYERCFIKCKTTQKHTFRYFKQNNDFDGNPRNLMQGGKHHKLKLQHS  
DATSHNARIFHQSLNLLLDGNTVVDITLNLQIFQHSSKPFASACWLAWGFLKSYEILH  
VTISCHLASQQANIVGRKVHKVLIRTQNDEIEEKLLMFSKQVQHSSFKFTLCGLFNIDAGL

LFNMIGSSTTFIVIMIQQFETITPTICVSNKKAMF-

>TcasGR154

MSTQDIYDAVYPLLLTTASFGLSAIFVETKNNTRKLAVFNLLKILNIIYLSLFSALLYVAFTSL  
KNTHLHVNYNSGVTKIGIIFQILANIMATYVIYFINISKSHNILTCIENIKKADLMFRDLGEKI  
IYRKHFLYEVCMLFGVLAAILGRSIVTHIYMGRNIFLTENETHFALFFPLFVSYLVQINFVLLI  
TLVHERFALINRLLDNFNEEKVKHNYLSLKPPYEYQTKYNQAKIELLMELHDFLTDVGNK  
LNDFSFIQILSCLTSQFLTEVFTIFYLYYESLILKNKIAALVWLMWSIWTTLEIFYVTVNCHL  
TTKEAKNTGIAIHKVLMNESDPDAKRKLMVFSQQVNHRSLQFTACGLFYIDATLIFTIVGA  
AATYLLIMLQFQEGIEAQCSNNTLLN-

>TcasGR164

MSAAHDIYSVVKPLLIFSKVFGLYPNTVENFETQQLTSPWSNGLDIVWSATIMIFLTFYSIYT  
MRMGKPKPATSTELIVEIGDIIYMSVSLIDAFLLSLFSITKRTKMVQFLQKFANFEKMKMQQLD  
LPLDLANEYTRAKVCVLFIAIATAISLIISYVIIDILFLGNVTFEDIGAEIVAYVYPLVTMMTM  
VMQFCTLCLLTRQKFRWINLKLQIRKQWQGNKTTYYSNKIKFVSPKETTKAITLEKLIY  
FLEQFRRRHYELCSLTENLNRIFNVQILFTCLNLFITITFTVYFYFISNSDAKIRSPVLYSTYY  
ALNGFINVSALFGLVWAASQTKNEVKSEPKTSLKTNIERRSGKLGADVKSQFKQFQF  
PDNAFLVPTFAKQCRIFRLSCVVGAITTYLVIVIQQFYQN-

>TcasGR166

MLPKQFLKLFKDPDVYTAIHPLFYVCTFFGLAPYSLVRVENGKKVFKFAWWPLTRNALL  
VLILLGALTYHAIFDLISFKDSLQQLRYFEEVFSLLSCCSVIFGCIFALKVIEVFKNIEEV  
DVAFRSLAVWVPYKHLVYVNIHLGLVTVATLVTIIFASYQYGTKTYSLFIVFMTVILPY  
FINLLMELQYCHYLNILRVRYQLLNEYLETLVQETNRTSVEGWTDVSNVKRKSKEISKLPK  
SMLAISDPVFIVDQVAALHIKLTDTAHMINYAFCVQQLLRITVAFISIVTALFLVAINFNKSSS  
EENEGKTTQLDYFFTFWAFSNACEVMAIVWITSETCEEANTCPRILHKIRNNTTNTNLQDT  
IEIYSLQMYHNRLYFTVCGLFPLDYTLTYTIVAGVTTYLVILIQFNNSDFVQRNSTEFDNATE  
SY-

>TcasGR168

MPLLDEIPFYWKYIYKIIGIIFPTEENASNIVPHLWPLPQNCLFIYICVKYYVSINHLKFLGI  
FYFVDALTSIGTALSLVISITIFIQRSRDLKLLQLKEIKIDSVHRKTRSKANHYLRILITIF  
YYFLFIPFESEPLFYTLFFIYPGIILLFDHIFLSDILEIICNEFEQINREIKYQTTSHRIIFKTKKIN  
DEEINDKMOVRAEQLSLCHCDLTALTNICHHFETIIVAMITSFNVTSTVYFLIYFLARSYE  
ANLFLVFGNNFAFLSFYVFWLLILEMFTRTEKEANITGRYIHDIWNKFEANGNMTKKLR  
HLQVLSIRFLNKNLEFRARNFFRLDWSFCHTMIAAITTYVILVQFHI-

## 6.IRs

>BmorIR7d.1

FNLPLKLTILSLFLGIILLNMLRKTIFFNIRVVCNITPPKRNSLFYAWLLFLGLPLEKFSSRK  
HFKIIILAWIWFVIRCAVQVTLVTSLSKITYNYNLRYDSDILKYPFGGMSSIRDYFIEDKD  
FYENWTSVDMQKAYKLLDEIMEEKTDFVLALNKDILHHA AEHIGSKRIQVIDNCIVNSPI  
VLYFRKHSPMTDPIAKIMNAALECGFIQYSYQTNWKRQKHLLNSHYAYNLQPLTLDNFSG  
CFFLLIIGYGISILYFVLEVVCCHKIDKTNQRIDLRVDQE-

>BmorIR7d.2

MSPRNLSDASHFCEENSNEITTAALNIALHNFKWRILTYVFFNATFLCNLNIFLKTYNKGV  
VVGNGLVEPRIDGKIQLVLFCDIVGITLALNSLPNQFDETGKVVVICQSPISWKCSAEEA  
MRSFWSVKITNVVFLKKDVFVMAYTYMPVYNEQCEISDPIPLFGLKPCIINATKCGVFDKK  
LDNLNKCKIVVSTLIRPFMIINNGIPEGADGDLILLIMERLNATLEVIIPGDHNYWGKLD  
NGTWSGSLGDVYYGAADISMTSAALTAISIYFKISIPYRSTNVVWISHPPKALSPALKLLH  
PFKPSTQIALGIIFIVIAVFLVSSKMMWLLCCRRVRPTKKKPSLLFNTWMICIGVPIAHL  
STSTFLSLIVLWIWYCFILRTFYQVWLINSLQGKFYLDGFEKIDEAIEAGYDIGGGIFLKEYF  
VDYPYIYNNWKETVSLNVTLHEISEGSNFIAATIYDLAKSLTNFEKINVHFLAEKVVVSPSV  
LFFNKNSPLVAPINELLQQLTESGFVEKISRNYFTHNVTNWKRQKHLNLSHYAY-

>BmorIR7d.3

MRTEPEDITLFLQHFHGSVAVIVPLDYQNMKA VSELNKATGFKQTVLFAVSVEEFILFITTLN  
LDLIVPIRMVLVLTTLTDLAMITKEAWKHDLAEIIISKDENEERLTTYFPYKNGICGDYT  
PHSISNEKELFPEKFNHLHGCPKIVTLLNFLPYVGLQKVN GTITFIFGIDGSVILLIKELNAI  
MDIVSSTDHGGMGVFNNGSWKGSFGDIVRREADIFAPAGIITQKRFSVAQMSHTYETLNIH  
WCAPPRREIYAWAKVLLPFLTNITPFLVLAFTVFVITIVLVKRSKLGHIKSNKNVFLQSFMI  
LGQGVKFKETKSSVINSFFVAWLWFLIVRIAYQGDVNLGLQKKIYEPFESVEQALQELDG  
YGGTELFREYYAGSPIADNYQVIKIGDLPRYIRDVIAGKRFLIATDILMHQYAKKFQILQEP  
LTHSPTCLFMRPGWPVSRRVDVIIIIRAIEAGLVQKIYDFHYTVRLRRHEKEEETGTRPLGM  
STMFACYYGLILLWIFSVIFLFEVLYYNWKHKIAYIKRKRNLKLFKHH-

>BmorIR8a

AVPWTLPKLDPETGDPLYNEDGQPIYEGYCVDLIQKLSEAMNFDYEIVSPRSGGFGRRLPN  
GSWDGVVGDLTGETDIAVAALMTAEREVIDFVAPYFEQTGILIAIRKPIRKTSLFKFMT  
VLRTEVWLSIVAALVLTGFMIWLEKYSYSAKNNPGAYPYPCRDFTLKESEFWFALTSFTP  
QGGGEAPKALSGRTLVAAYWLFVVLMLATFTANLAAFLTVERMQTPVSSLEQLARQSRIN  
YTVVEGSSTHQYFINMKFAEDTLYRVWKEITLNATSDQAQYRVWDYPIREQYGHILLAIN  
ASGPVADAETGFKQVNDHTDADFADFIHDSAEIKYEVTRNCNLTEVGELFAEQPYAIAVQQG  
SRLQEDISRALLELQKERFLEQLTSKYWNETLRQSCSDADESEGITLES LGGVFIATLFLGLG  
LAMITLAWEVFYYKRKEKNVQSTKENVERPPIKSAKLGKMAVGVARLRKRATKIGKK  
KNVTIGDSFKPSVSYISVYPKGDYR-

>BmorIR21a

MDRRSLYGLLFIFYIISSEIISYHSESLKNASRNLLWNKKITSIIKEHNDFAHYHYESDLHFG  
NRIKNVKSRAVDPVFHGHPKTREELWYERFLNRSSVFDQTPSLIKLIQNITLTYLNECTPV  
ILYDSQIKLKESYLFQNLNRNFPVSFVHGYINEHSQLQEPKLLQPVRECLHFIIFLSDVKVSA  
KVLGKQSESKV VVARSSQWAVHEFLSSSFSRGINLVVIGQSFKEDDDSTIESPYILYTHK  
LYTDGLGASKPVVLSWSHGKFSRNVNLFPPKMTGGYAGHRVVAAANQPPFVFRIF  
KKIYRIKSDLGDNPRVWDGIEIRLLHLLAEKNNFSIEIVEPQELHLGSGDAVAKEIAKGR  
ADIGVAGMYLTIDRTREMDVTFHSDCAVFITLMSTALPRYQAILGPFHWHVWVALTLT  
YLFGMFPLAFSDKHTLRHLINNSGEIENMFWYVFGTFTNCFTFLGRNSWSKTDKITRLLI  
EIGKIFPCYYFRMVLDFTHIITSCYTGSIIFVTLPMFPETVDTHIQLLAGFYRVGTLDRGGW  
ERWFLNSSDPNTNKKLLKLELVPNVEAGIMNTTKAFFWPYAFLGSKAELEYIVQSNFTKT  
TSKRAVLHISNECFVPGVTIGFPNNSLYTAKLNNDLRRMVQSGIVDKIVDEVREWRWEMQRSS  
NGKLLSAVGGSLKVSAAEEKGLTLEDTQGMFLLLAAGFLIAATALISEWIGGFSKLCRFRK  
KKNTLVNSSTKEDSINMPPTDSKDFKTETESVLHFCSRSTSPGSNESLDGQIINVTEESIEIH

KQFTSEWDSRRSSVLEKEVKEIFERDLRRRGAALXXXXSTASNNAFGDAVK-

>BmorIR25a

MCRSSHIFQNSMPLFVVFLQFFIFRLIVSQTTQNINVLLINEENNALAEKSFEIAKEYVRRNP  
SLGLAIEPVIVVGNRSDAKTFLENVCRKYNDMLSSKKTTPHVVLDFMTGTGSETIKSFTA  
ALALPTISGSFGQTGDLRQWRSLNANQTKFLLQVMPPADILPESIRAIIVTKQDITNAAIFDE  
LFVMDHKYKSLQNIPTRHVITPVKSFNKEDIKTLRSLRELDIVNFFIVGSLRTIKNVLDA  
ADENQYFGRKTAWFAFSLDKGDITCGCKDATIVYMRPTDAKSRDRLGKIKTTYSMNGEP  
EITSAFYFDLSLRTFLAVKSLDSDGKWPNNMKYITCDDYDGKNTPNRTLCLKLAFQEVKE  
TPTYAPFYIPGDDPMNGRSYMEFSTDLSAVTVKDGASIGSKALGTWKAGLNSPLSLTSDS  
NMSDYSAQLVYRVVTVQPFIRDDNAPKGFKGYCIDLIEIRQIVKFDYEVTLSPDGNFG  
TMDENGNWNGIIEKELIEKRADIALTSLSVMAERENVVDFTVPYYDLVGITIMMKLPRTPTS  
LFKFLTVLENDVWLSILAAFFTSFLMWVFDKWSPYSYQNNREKYKDDEEKREFTLKECL  
WFCMTSLTPQGGGEAPKNLSGRLAATWWLFGFIIIASYTANLAAFLTVSRLDTPIESLDDL  
SKQYKIQYAPLNGSAAMTYFERMAAIEVRFYEIWKEMSLNDSLSDVERAKLAVWDYPVS  
DKYSKMWQAMKEAGLPNSIEEAVQVRVDSKSSSEGFALWGDATDVRYVLTSCDLQMV  
GDEFSRKPYAIAVQQGSPLKDQFNAILQLLNRRRLEKLEKENWWNNPKAMKCEKQDD  
QSDGISIQNIGGVFIVFMGIGLACITLGVYEWYKWRRRRPVGDVTQVEPAKSTRNIGN  
FVKGEGFTFRSRNFGLSDLKQKF-

>BmorIR40a

MTKLPKDFNVAIKDIAESLPSKEMTVVRGNSTNIRSQDVFELLRLCQHNIQVVNLDAAM  
ENKEMYYGYLKKALDVS DERTNLILCEPYECENLLELRENLIHRTILYIFFWPYGSVSD  
RFLNTMVEAMRVAVITNPRESVFRYYNQATPNRLNHLNWNWAFRLYKSPLLPSADKV  
YKNFRGRVFDVPVLHAPPWHFVKYNNSSINVTGGRDDKLLKLIANKLNFRYRYDPPD  
RSQSGIINGNTFKGTLGLIWKRQADFFLGDVTMTWERLQAVEFSFLTADSGAFLTHAPA  
KLSETLAIIRPFRWEVWPLVCATLITGPALWVIAAPSLWQRKRDQMGLLNCCWFTVT  
LFLRQSSTKEPSSTHKARLVTVLISLGATYVIGDMYSANLTSLLARPAKEPIGTLPALAEA  
MREHGYELVVESHSSLSILENGTGVYGR LAKLMKRQVRVQVHNVEAGVRLVLNRRRVA  
VLGGRETLYYDTERFGSHNFHLSEKLYTRYSAIAFQIGSPYLETINNVMTLFEAGILGKM  
TTDEYKNLPEQSRSEPVTESENLSTEKTGETAAVTQIQNETSKGLEPVS LTM LGAFCLL  
GIGHLLAGVTLLIEIQLYRRARKRALPPQTRNPTNTFKAKAKKCILRGWRRIKAAAILAIDR  
ALAPDRGID-

>BmorIR41a

IEILLQIINKYLSSEYCLVVISETPLSVKLPMSFTYLDPKKEHFSVETLLKLSEEGCSDYIIRM  
EDPRQFMNALEEIRPMSMVRSDKLVILPVTDDENSMEPILNLLTMKESYAHILLILPT  
QTERFECLAFNLITHRFVGSDES KLPIILDRWYSCTNHFENNVYLPNDLKNLNGKTMKI  
STFIYKPYVLLDVTAVAPLGRDGIEIRMIDEFCRWINCTVQIREDVDLWGEIYENETGIGV  
IGSVVEGRSDFGIAALYSWYEEWKAMDFSVS VRS AVICLVPAPRVLESWELPFLPFKSI  
WIAVVITFVYASIGLTIAQGCSSNKALLIVFGTIIQSQYIVSDSWRIRSVIGWLLVSSLILVSA  
YGAGLASTFTVPQYEPSIDTVQDLLNSRMEWGANHEAWTFLALSSEPVAKKLIKQFKIYS  
FEELQRRSFLRKMAFSLEELPAGTFAIGEYLSKEAVQDMQLMLEFFYFDHCVAMLHKNSP  
YTEKLSLIGRLHQSGLLAWESQVSLKYLDYKIQLEIRLSRARSVDGDLKPLNFNHVEGI  
FLIFITGTILSTLFFALEIFIGKQARKK-

>BmorIR64a

MNILGLNIISFLCSLDISSVIEVFKCKHVRDVIVFHCFKENQLILPQRMFHFNNFRTVVFVIS

NNISWELPNSYPKIGVLINTSCDGWKEFQEFQNSHTWVYYTDNLTSTITALSTFPIEINSDV  
TVVYKENSAYQVFDTYNTGRKNNGVFNVNYIGHINPGLQTNLKFTRNLNGVTLKSTVVI  
LKKVQYESFEEYLKTEQTGLDSVHKHKFFQLLQYISEMYNITYDLIRNTWGYAHDGRI  
DGMVGSQRHEADVGGSPIFFKTDRAVVDYVAETWPSKQSFIFRHPKHPTGVHTVYSRP  
LSNSVWYCVIAFLVFASTVFFMLKFNIDEIERAETSQSLAFLFAWSAICQQGMSLRRLNSLA  
LKVVVVFVTFVCSITLYQYYNATVVSTLLKESPITIRTLKDLLQSDLKVGVEDVAYVKDYFA  
HTKDPIAITMYEKKIVTGNRNFFDPEYGMVSLVKKGGYAFHVDTVYSYGIMKKTFTEREI  
CEIHDVTMYPPQKMGAVLKKNSPYRNYFAIGIRRLWETGLMQRMKHIWDEPKPPCVRTQ  
DSSIFSVSILEFSTPLFIVVFGVIASVVLLCETLFDTLFNMR-

>BmorIR68a

TIMPLTLFSRSPRSKTRAVSKASPILEDIYEQKDLEFVLDLLNHAGRYHDFTCVAVICDAI  
YYNVFDGAFFKRIDTVPFVMIVVEEYDDLSPNFDILEALREARRDGCNMYIILLANGLQA  
ARLLKFGDRHRVLDTRAKYIILHDYRLFHSDLHYLWKRVNVIFLKHHRKIGSVAKSQAW  
FDLSTVPPFNPIKGVFVPRRVDLWKSQKGFHYNTVPFDDKTSNLNDEVLHVYLDHVPSVV  
VVNSNETGQIGGVEIEIINTLSEKMNFRPKLYQPMNVELHKWQKQPNGSFSGLLGEMVN  
GRADLALGNLQYTPYHLELIDLSIPYTSQCWTFLTPEALTDNSWKTLPLPKLYMWIAVLL  
VLXITGTIFYGLARYQTYLHGLKRQEEMKPKVYSKPVGLYLFGEIINSILYTYGMLLVVSLP  
KLPTGWSIRFLTGWYWLYCILLVVSYRASMTAILANPAPRVTIDTLVELAASKLTCGGWGI  
ETKNFFQDSLDEIGQKISDRFEISNDPNIAADKVAQGTFAYYDNKNFLKYITVRRQNGFIME  
TIDNTTNTSISTKSNERNLHIMSDCVVNIPISIGFHKNSPLKPLTDIYITRIVEVGLVEKWL  
NDAMYTIKTLETNEEEIKALMNLKKLYGAFIALAIGYFLSVMCLIGELAHWNCVVKKDPN  
YDKYALHKYYEKINKK-

>BmorIR75d

VNIQNNFANAPELPAYDFRREGVVLDLNCPSNKLILEKASKNRAFIHRYTWLLIHNSTYKL  
ETIQKILSDAAVLPDADVTWCAADDILDIHRLNEHQPYVVMDLGLSVNSTIEDLDAVWSTI  
PTAATRRRHLNLTINAVVIVSQPQYFKGWSDSLNRQIDTFPKLTYPMLMLCAEDLRFN  
LKQVDEYGVELNGSFTGTVGLLQGRAELGVASMFMRSDRWRVLFHSSATVALLNAFML  
RAPAQSSVSNIFLLPLSRGVWCCAAALLCGSAVLLAVLSCRLVAADPTLQLLTLPEIFVFSIG  
TVCQQGFYIMPKLSSIRMIMFLTLTSLFTFTAYS AKIVAILQTPSAAVRTVADLADSHMDV  
GIQETTYKKVYYAESTDPSILRLFHRKVAPLGERVYMSVVEGVERMRTGLFAFQVERSSG  
YEIISKTFTESEKCGLMEIEAFKLPMAVPLRKHSYRELFGTRLRWQREVGLMSRVRAIW  
LAARPRCEGRGVGFRAVRLDMLPALQMLAAGGLVAVVLLILENVYHHYSRTGNVLRRT  
YRNVFKLVICYKCYTF-

>BmorIR75p

MVDVRPHRELFKRRRDVMGRPLTMANVIQDSNNTRYHLPREDALELQYDVIPKICWMTA  
KLAQMLNATPRYTFSYRWGYKVNGQWSGMINDLHTSKADLGTNCVSDVERLSVVTY  
TDMLAPFRVRFVFRQPPLPSVANIFYLPFTGRVWAAVAVCAMVYTAIYWASKWEFNLEK  
RSASQFDGTVGDAMLLTMSALSQQGCFIEPKRAPGRIMLFVLFALMALYAAYSANIVL  
LQAPSNSITSLAQLAASKVTLAANDVDYNHFVFSLYKDPVRVMIHKRIDPETGNGQFYSLE  
DGVDMIRQGFVAFHSIVEPVYRRIEETFLETEKCDLTEVDLSSFDPFVVKKDSPLYLELLR  
VVKKKKIRCSFKQIRESGIQSALNRRYQVPKPRCSNKVAAFSSVGIVDLRPVLLIMMIYGISS  
CLILIMEMLVFKM-

>BmorIR75q.1

IFKIKNPVAITFGKIGNVEEVTPSNHILFLVDTTCCNNSHIVLQEADAHQQFRRSYRWLVLET

QSGSYNSKLEIEPLNILIDSDVLLATKIENVTYVLKKIYKISTQSEWITEDYGNWTAEHGLI  
MSNISSDASRRRNIRGHPVTTSIIVTENRTKSELDDLKNLLSDSLAKICFRHTKNLCQFMN  
ASHKIGFASMWGYKTNGTWNGMMGDLAKGTVDVDFGGTIAFLTSQRLQVVDYLSSPVPINA  
KFVFREPPLSYQNNLFLLPYKANVWYCTAAFVLLVILYINAKWEIKKAEYEQAVTLQPS  
VSDVTILVISAISQQGSSNELKGTLAGRAVLFLFLFLYISYSANIVALLQSNKQIRTLQD  
LLNSNLNIXDGKPLFQTATEPIRKAIYETKVAPKGSKANFMSIEEGVKKLQKSPFAFNMNIG  
TGYKIIERYFEEHEKCGLQEINYIESSIPWMSKRNSPFREIYKLGFLKLEHGITDRENRL  
FARKPVCIVRGGNVGSVNMVDVYPVILMFLYGLFLAFLILLVEIVVHRKL-

>BmorIR75q.2

MSGGFQKNTNINEVIAVRRRDLEGYEIKICYVLTDNDSIHHLSDENVNDHIDTITKVNFPSTN  
HLLDFLNAERKYVFNVTWGYRINGTWNGLTGFLVNGDVEIGGSPMFFTAERTAVVDFISSP  
TPTRSKFVFPKLSYENNLFLSFRTAVWYSTLALISLIFTMLLSVTAWEWKMSQIKTR  
DIDAGVLRPSVTDVMTLVFGATCQQGSTVELKGSGRVVMLILFLTLMFLYTSYSANIVAL  
LQSSSSQIKTLEDLLHSRLKFGVHDTVFNRYFSTADEPVRKAIYEKKIAPPGVAPQFMSM  
EEGVKKMRKGLFAFHMETGVGYKFGYKFKYKESKCGLKEIQYLQVIDPWLAVRKNTPYK  
EMFKIGMKRIQEHGLQNRENRLLYEKRPKCSGRESNFVSVSMVDCYPALLVLSYGIIAIAL  
VIMENLWQYRHLIKGKLEFFSSVNTIENFNQFEKHPSHNWKKFYVIDSAKIKKINPSTN-

>BmorIR76b

MLFSNAQRSGQNFPLSWIERDENGTVQAYGVAFKIIDLQKFNFTYEIVIPHRNFEIGGSK  
PEDSLIGLTNTSKVDMIAAFIPRLVFRKLVTFSRDLDEGVWMMMLRRPKESAAGSGLLA  
PFNNFVWYVTLASVLCYGPCICFLTHVRSKLIKNEERPLRLSPSFWFVYSAFIKQSTNLAPE  
ANTTRVLFATWWLFIILLSAFYTANLTAFLTLKFTLDIETPEDLYKKNYRWVSVEGGSVQY  
TVKTQDEDLYLNKMTVSGRAEFRTLSPDQEYLPVKAAGAVLVKEMISLEHLMYGDYLT  
TREGVEEAKRCTYVVPKPFMKKPRAFVYPVGSKLKSLFDPTLAYILQSGIIDYLEHKDLP  
STTICPLDLQSKDRQLTNSHLMMTYIMCVGLASGLAVFVVEILVKRYINIKIPIDKVKLK  
KFKRSKRSPRYDDSGPPPYESLKVKPKFDSEKRWKMINGREYVYEDARGGTRLVPVRT  
PSAFLYR-

>BmorIR87a

MTTGNSDQIAKTAECVLKLSAKYFVERKALSGSIVIINVNSYSSTTQGLLLKTIHSSIKYSV  
MAKDSFYPHANASHFPEKAKNYMLILEERTELKRNIQNLKLPWNPLAKAVVYQIKGN  
ESAQRIAIEFINELREHKFFRSIIFINNGTESGVTSYTWRPYSENNCGGKCDVYVLDRCN  
NIVEQIEPQPEWFPNMNGCPLTTYAIVSEPYVMPPIRKIPNAKFDDVYEFQKGETNLVKT  
IAEFSNMTLIVRLSAIEENWGIIYANGTATGAYGVLNRNDSVDIVFGNIEVTKQIRKWFHPTIS  
YTQDEITWCLPKAGQASAWDNLVIFQWTIWWATFTSLILMGLLFHYMYREKNKKITKW  
PTNSLLMTFSMLLGGWGSHEFEPKTATFRILIFGWLCFSINMGISYESFLRSFLMHRPFKQIAT  
ESDLIQSGIRFGGREIYRTYFESNDASSYLHTEYSSTTFSEGIRRAALNRDFAVVSSRRQAE  
YQDQKLGKASLIYCFPESDNLYKYSVLLARKWFPMLERFNGIIRSVSENGLINKWVDE  
MFIHRVSLEGASTIVPLSIQHLLGAFMFIGFMYGTSAFIFLVEVFGVQRRRAFLSAFFCGK  
KKRFSAVFKVKV-

>BmorIR93a

MKIWVLGVLCCLAISVQGEDFPSLITANASIAVILDRQYLGDKYQTVLDELKDYIKELARVE  
LKHGGVLVHYYSWTNISLNKGFLAVFSIASCEDTWELFSRTEEDLLLFALTEVDCPRLPQ  
RSAITVTYSEPGEELPQLLLDLRSSNAISWKSAVILHDDTLGRDMVSRVQSLTSQIDEESA  
RPVSVTVFKMKHEMNEYLRKEMHRVLSKLPVKYIGENFIAIVTSDVMTTMAEIARELL

MSHTMAQWLYVISDTNAHASNLSGFINTLNEGENVAFIYNITENGPDCKNGLMCYSQEM  
MSAFISALDAAIQAEFDVAAQVSDEEWEAIRPSKVQRRDILLKHMQQYILAKSVCGNCTL  
WRALAADTWGVTYRQNDVPEQINEHANGSTGVIEHLELMNVGIWRPIDAMTFADLLFPH  
VHHGFRGKELPIITYHNPPWTFLQANESGAIVKYSGLMFDIVNQLAKNKNFQRLPHPSNR  
NALLHGRNRQGGGTYPCGLTKGPITYNNIPLYFRAVFAHQAGVNLKNNYYRCINYTIPV  
STQPHTFIVARPRELSRALLFLLPFTTDTWLCGFAVILMGPMPLYIVHRLSPYYEAMEITRE  
GGLATIHNCLWYIYGALLQQGGMYLPRADSGRLVIGTWLVLVIVVTTYSGNLVAFLTFP  
KLEAPVTTISELLKNSDAYTWSVTKGSYLEMELKNSEEPKYKRLIKEAELLKETGGIEGTI  
HAARGTLDRVRGQRHLIFDWRLRLTYLMSADHIATETCDFALAVEDFMEEQVAMIVPAGS  
PYLPVINKEINRMHKAGLISKWLSAYLPKPNRCLKISTVTQEVSNHTVNLSDMQGSFFVLF  
LGNDKIYVYMYIAELI-

>BmorIR143

MFSVKYPRFYLFIIQIASNFGDAVTMPQLNSSINSK SATDCLIKVCYADLSFRRTVILKHVSY  
ESDEENAFYNEIIHAVNNNNIQLVVLEEIDNLNDTINIDDADWLVVVYFKNCKALTEFNVK  
IVFEKIKYFIIVSDDLNEDCTSKMKTIGNVINKYDVTFFVFNENKEDNFKFMTFIPQIDEETC  
KEIVTLPKIVNICANGQIERKSIFPSKNPKDIKKCPINVGMGSLYPFGIINHKEKYKTFDPLN  
ETEVRGLDVDLVKVLVNQFNGTLNLYFIYKKEENPFGQLDFIPLVLNGSLDVIAGGFYRIY  
GNVVAYSGIYTSQAVTWMYVANRTTKSWQSLIVKIDGLYIFVIFHLIYSYVWYFVRKFDEQ  
AVDFRNTILYSWGALVGTTSLQDALSLKQRILNLTYLIMCVHLSAYVSLHLYYFLTVPLEPPE  
LLKSNDVMRSGRPAFLIPISKYFVLDEKYL SFANASEECTKFQDCSDLRNGVITILQG  
FFLNYQARTAINYEAKVLSAAENVLTVYYEMLLRKNSPYVERLQKLMTHLFEAGIPDRFY  
RHAIGLTVIGKAHSACQNTVSNSSYSCQSGCKITFDQFAGVFYLVWLFGCVLSCGAFIFELFSK  
FGRA-

>DplelGR1

MGHPLTISNVIQDSNTSQYHIIKENRLELHYDGTTKLSYVHVQIAFQMLNATPRHVFHRW  
GYKKNQWQSGMINDINTGRADLGTNCVPAVERLSVVVFTDCIANFEVKFIFRQPPLSYVS  
NIFTLPFSKSVWIAIATSFAISTITYIATKWEDHTQLDGSIFDAMLITMSALSQQGCSKEPKK  
LSGRIMSFVIFSALMAVYTAYSANIMVLLQAPSSAITTLEQLANSDIKLAHDVDYNHFVL  
KAQKDIPIKAIYRKISPEKGKENFYNFNEGVELLRQGLFAFHAILELVYLRVEETFLENEKC  
DLMQLDFMNSHDPFVPVYKHSPYLELLRVVFKRIRESGIQMANHRRFQVPKPRCTEKISTF  
SSVGIVHMKPVLLFITYGFLAAFLIMLAEIFVFRMKMFKRKELKYFSLRNRPSKENLTIKFP  
N-

>DplelGR2

MPEGNWKVETFGTWTYEMGLKKLITMNIPSSQRRRNLEGTKIGTSMVVNDNDTRMDILS  
MRNLNTDHLTKAGYRQILPLYYFMNATLITVFTDTWGYLNRNGSYDGMIGEVRGTAEELTG  
TLGRVVMFLMFFVFLFLHTSYSANIVALLQSSSNDIKTLADLLNSKLELGAEDTPYNRQHL  
STASEPIRKAIYEKKIAPAGSKPNFMTLEEGVKRIQMKPFAFHMYLGGGYRLVEKYFLEHE  
KCGLQEIQFNHETIPWVTCRKNSPYKEIFKIGLLRNQEHGLNDRVNRLIYSRKPVCVHGG  
TFGSVNMTDFYPALLMLVYGMIASLLLLAIECLASQHLCHIRNRI-

>DplelGR3

MSPPPKKFDPQMILTWNPASNVPALHTHTSSIFMHEIAEIHNIIRYNYTVVDVWIGDYKREHA  
YVPNYYYNTKHAKAEDELKKMKKLEKKGKPIIFPKDGLSLVKEGGYVYHGEVDSANK  
IIAETFNQRELCDLGLSQSMDKTFAYISVQKRSPYKEFFTWSLRLMETGILNRIHKRTLGS  
ANKCEGSTPRALALGGAAPAFILLAAGYILAVILVLESSKGFQISKYIQTKVSIIAEFLIINR



ALPPLIGEEGEETMRKLEGGKTERAGKGGNREETEKEGKREGQPGLAPIETRRNLSAFHG  
FIEVPGPSLCRERSLNCAWDLRPRVNVMTPRKPFIFGDICGEDTVSQDTMSKILIVLLLVF  
VAGDFAQRYRRPIYRRRGRSVEEPSYNTDDYQPDPEYTIPFLGDIKLEQQRQQTGLDLS  
AKPGHELSYATSASALSTPDKDGIVPESPPASIFLNPSALPSKHRK-

>DplelGR4

MLGDVFRSLQKPCFVFAFSCWTQEQKLMAYSALAGRNVENDIIKVFESDKIFNNKEIKH  
HTVFLADLNCPQDHVNVNWTNPALFRFPYRWVIIKDSGENGTVPDVIRDIDVLIDSEVV  
VIRRINDASFQIYYVFKIGPNTTWNELYGQWNEGLFKTESMLEVTALRRMNLNNYEIRI  
CYVLTDNDSINHLADEVNDHIDTITKVNFPPTNQLLDFLNASRRYVFTNTWGYKHNVTW  
SGMTGFLDREEVDIGGSPMFLTGERLSVVEYISSPTPTRSKFVFQQPKLSYENNLFLLSFKR  
SLWLGSVVLISMLFLFLVTVWEWKRTSIHKRTIRTRNAGILRPNVVDVALLIFGATCQQG  
STVELKGSGLGRMVLFLFIMLTFLYTSYSANIVALLQSSSSQIRTLEDLLHSRISFGVHDTV  
NRYFFSTETEPVRRAIYEKKVAPPGSAPRFMTMEEGVQEIRKGLFAFHMETGVGYKFGVGR  
YFEEGEKCGKKEIQYLRVIDPWLAVRKETPFKEMFKIGTKRLQEHGLQRENRLLYEKKP  
KCTGRQANFISVSMVDCYPALLILSYGTLISISVLFANLYNRRRLLHRMQSKKKNMVKE  
IYKIYPPKAVQFIEINDNIVPDSLNTIIVMDMKCPKTSEFLKKVETFGTWTYEMGLKCLIT  
MNIPSSQRRRNLEGTGKIGTSMVVNDNDTRMDILSMRNLNTDHLTKAGYRQILPLYFYMN  
ATLITVFTDTWGYLRNGSYDGMIGEVRTGTAELTGTGRVVMFLMFFVFLHTSYSANI  
VALLQSSSNDIKTLADLLNSKLELGAEDTPYNRQHLSVS-

>DplelGR5

MADSNTRYHAMIKDDYLPQNLCIECMQRLKNCYKFRQTQLQAQTIIVDLIRIGNFTTEAI  
KSLNHNPKCKLQMQRF DANHC DAYINKEDVNPIQEI VIEEQVKIEKEFINEQDTVAMGYTT  
DDSLPLETQRTKAKKTKKKKKEKKIQEPKVDRRRKPFLNDDLNESLFTITDLTLEEQIADIQ  
KRQESSNFKNSVYKCMCFKGFLEDEGAYNGHMTRHTTSVYGVMEGYRGMVRLPVSARR  
RDLRKHNLTMANVITDSNETRQHLDLRLNLHQDSITKMSYVVAKICFDMLNATENRIFTH  
TWGYKDKNGNWQGIIDHLLKKKADLGTLTIFTQERMKAIDYIAMVGSTAVRFVFREPLA  
LLENIFTLPFTSAVWIAIGICVLGCAVFLYITSKWEATVGMHPLQLSGSWADVLLIIGAVLQ  
QGCTLEPRYAAGRCVTLFFFVSLTVLFAAYSANIVLLRAPSSSVRSLPDLLNSPLKLGASD  
FEYNRYFFKKNLNDPIRKAIYSKKIAPSGKKPNFYSMKEGVEKIRKGLFAFHMELNPGYRLI  
QETYQEEEEKCDLVEIDYINEIDPWLPQGKRSPYKDLFKIRS-

>DplelGR6

MRILCLCVALCSVFSQNVASIDADLAVDYFLKKHVPFVCYLTCGLRRISFDLAQHNKLVKA  
FLRSNIRISLMRVEKHALDLNKNLHQWTFPIGVLMGSCNGISNVLEQASRSALFDDGHM  
WLIFENMNEKRRGDVRIENLLQNLNLSINTDIVVALNTEDTDIQLMDVFNFGKIQGNLEK  
KFIGTWSRGLNLSRFRKYDRWDLHNLTLRAITVVLGAPQGYDPEMILQPGYDWRVA  
LITKSAQQLLAIIRENHNFRFNYTIADLWVGSPLKNSTLGVNTSIYWGEQDISFTSLRMFSP  
WMEWVDPFFPPTTKLETKFYLLDKGVGNENRFLTPLSSGVWWCTAVASVVCVSVLA  
VTAVLEERDEPGLYALFSVFAVICQAYEDGVQLFDEFSSSQGRRLLLVVGLMSMLLYNY  
YTSSVVSWLLNAAAPTMSNIDELIDSDFELVFEDTSYTRGWLNNPGFFYYSGLKNPKEDIL  
RNRATVTKRTTKLLQTA AEGMELIRSGDYAFHTEPYTAYQAISRSFKEKDICTLGS LQIMIP  
ANTYIVGQKRSPYKFFVWSLMRLLERGH TSAVRARASGVTPICSGTVPRALALGQAAPA  
FAILAQTAVVSFIILLFEIYWHRRRSHDKKQVRVLNNRAHNAQEVGKNDSL RV-

>DplelGR7

MNTYTCSEVSGTGRTPAPLDRPSSEHTDRQAPSARWSSLTAYKIAEYSEVILSLRAVWRPA

RYDFKNSTLVEIVKQNKIVKSVYGVMEDYRGVRLPVSARRRDLRKHNLTMANVITDSN  
ETRQHLDRLNLHQDSITKMSYVVAKICFDMLNATENRIFTHTWGYKDKNGNWQGIIDH  
LLKKKADLGTLTIFTQERMKAIDYIAMVVGSTAVRFVFREPPALLENIFTLPFTSAVWIAIGI  
CVLGC AVFLYITSKWEATVGMHPLQLSGSWADVLILIGAVLQQGCTLEPRYAAGRCVTLL  
LFVSLTVLFAAYSANIVLLRAPSSSVRSLPDLNLSPLKLGASDFEYNRYFFKKLNDPIRKAI  
YSKKIAPSGKKPNFYSMKEGVEKIRKGLFAFHMELNPGYRLIQETYQEEKCDLVEIDYIN  
EIDPWLPQGKRSPYKDLFKISFIKIRESGVQSCVHRRLHVGPRPCSGSVSTFSSVGITDMYP  
ALQATLYGAVMSVAVLMMMEKVHYKL-

>DplelGR8

MKRNSRIDLSGVVLKCVVVLDPIVNQTFKQYLDNAKPGIVDSLHKLKFYVLLKYLEDL  
CKFRYKLERTNSWGYLRNGSFDGMV GALQRREADIGGTPIFYRPDRARFIDYTTPTWQSR  
HY-

>DplelGR1a

MESVCSGVAEPIPEVAVLLEQAVAAGGGAAAGERGQSLEPYEPLAVPEHICTQASEGLLAS  
VGGVEAADAARAGLLLLASPVAVPSAMTIASSTEPDHPLSAALEFYPRYDVLAEACAA  
LCEAKGWKHAVLLHDGSGSAAPLIVPDHDTLALRVRQLPSREDDDALRNLLLVLKKFGA  
VNFIVWCSAECSVRVLDAAQRVGLLSERHSYMLSLDLHTLPLEDFS YGGANITSLRLFDP  
ESSAVNVSMEKWQQYINLLGNEANEEIDKIISNPPTSLLSYDAKIVSEGMEYLDL PFM  
EDSPSCQGGTAAFHADTLLNYLRSEENSGATGPLWWEATGARGGVRLHVAELERGGFLR  
AAGDWSRTGGLTWRPRPPAPPPPDAMTNRFTTVLIAQNQP YVMRQQSSERLSGNARYEG  
FCIELVDRLAQLLHFNYTFIEQADRAYGSLNKTTKQWNGMMRRLMDDKNVDFAITDLTIT  
AEREEIVDFTTFFMTLGISILFHKPQPPAPPELLAFLLPFSNGVWMCLGLAYVGSLLVLYVVG  
RLCPEEWQNPYPICIEEPSALENQFTLANALWFNLGAVLQQGSEIPIAYGTRAVASIWWMF  
ALVITSSYTANLATLLASKTSTELIRNVRELAENDQGITYGAKSSGSTYTFEMSSSEPYKS  
MFQKMKDVTMPSTNEEGIEKVMNEKYAFFAESTTIDYTTERNCEVTRVGDLLDSKGYGIA  
MKKNSPYRQALNLALLNLQEAGILREMKHRWWKEMHGGGACQDKEDHATERLTIDNFK  
GLILVLTVGCALGIVMSCCDLAWSAWRHRDPTRSFAASFVSELRFVFRFEQSEKPVRGAL  
TPAPSSHDSPPSAHSESELTTGSGVDGRGRGREEDDNHGEDDVGSRFSARSRRTSARRCS  
MHAASRLARHTTPRR-

>DmelGluRIIC

MWQRILLGCMWSAFFMCRSRGQQINIGAFFYDDELELEKEFMTVVNAINGPESEQTMR  
FYPLIKRLKPEDGSVTMQEHACDLIDNGVAAIFGPSSKAASDIVALVCNSTGIPHIEFDISDE  
GIQAEKPNHQMTLNLYPAQAILS KAYADIVQNFGRKFTIVYDADDARAAARLQDLLQL  
REVHNDVVRVRKFHKDDDFRVMWKSIRGERRVLDCEPNMLVELLNSSTEFGLTGQYNH  
IFLTNLETYTDHLEELAADNETFAVNITAARLLVNPDPYPYSLPYGYVTQRDNIVYESSDPP  
RTLHDLIHDALQLFAQSWRNASFFYPDRMVVPRITCFAASGGRTWAMGRYLARLMKG  
TSGVNNTNFRTSILQFDEDGQRITFNIEVYDPLDGIGIAIWDPRGQITQLNVDVKAQKKMIY  
RVATRIGPPYFSYNETARELNLTGNALYQGYAVDLIDAIARHVGFEYVFVPVADQQYGKLD  
KETKQWNGIIGEIIINDAHMGICDLTITQARKTAVDFTVPMQLGVSILAYKSPHVEKTL D  
AYLAPFGGEVWIWILISVFVMTFLKTIVARISKMDWENPHPCNRDPEVLENQWRIHNTGW  
LTVASIMTAGCDILPRSPQVRMFEATWWIFAIIIANSYTANLAAFLTSSKMEGSIANLKDLSA  
QKKVKFGTIYGGSTYNLLADSNETVYRLAFNLMNNDPSAYTKDNLEGVDRVRKNRGD  
YMFLMETTTLEYHREQNCDLRSVGEKFGEKHYAIVPFGAEYRSNLSVAILKLSERGELYD  
LKQKWWKNPNASCFEEDPDATPDMTFEELRGIFYTLYAGILIAFLIGITEFLVYVQQVALE

ERLTFKDAFKKEIRFVLCVWNNRKPVAGTPISSVRTTPRRSLDKSLDRTPKSSRRVVIGRSS  
EEMREMAQSGSGSSSGSNNAGRGEKEARV-

>DmelGluRIIA

MRLCPVVIIYAFIIIIGFLEGIIALGGDDRNEITVGAIIFYENEKEIELSFDQAFREVNMMKFSEL  
RFVTIKRYMPTNDSFLLQQITCELISNGVAAIFGPSSKAASDIVAQIANATGIPHIEYDLKLEA  
TRQEQLNHQMSINVAPSLSVLSRAYFEIISNYEWRTFTLIYETPEGLARLQDLMNIQALNS  
DYVKLRNLADYADDYRILWKETDETFHEQRIILDCEPKTLKELLKVSIDFKLQGPFRNWFL  
THLDTHNSGLRDIYNEDFKANITSVRLKVVVDANPFERKKTRLTKVDQILGNQTMPLIYD  
AVVLFASSARNVIAAMQPFFHPPNRHCGSSSPWMLGAFIVNEMKTISEDDVEPHFKTENMK  
LDEYQGRIHFNLEIYKPTVNEPMMVWTPDNGIKKRLLNLELESAGTTQDFSEQRKVYTVV  
THYEOPYFMMKEDHENFRGREKYEGYAVDLISKLSLMEFDYEFMIVNGNGKYNPETKQ  
WDGIIRKLIDHHAQIGVCDLTITQMRRSVVDFTVPPMQLGISILHYKSPPEPKNQFAFLEPF  
AVEVWIYMIFAQLIMTLAFVFIARLSYREWLPNPAIQDPDELENIWVNNSTWLMVGSIM  
QQGCDILPRGPHMRILTGMWVFFALMMLSTYTANLAAFLTSNKWQSSIKSLQDLIEQDKV  
HFGSMRGGSTSLFFSESNDTDYQRAWNQMKDFNPSAFTSTNKEGVARVRKEKGGYAFML  
ETTSITYNIERNCDLTQIGEQIGEKHYGLAVPLGSDYRTNLSVSILQLSERGELQKMKNKW  
WKNHNVTCDSYHEVDGDELSIIELGGVFLVLAGGVVILGIFEFVWVQNVAVEERVTP  
WQAFKAELIFALKFWVRKKPMRISSSSDKSSSRSSSGSRRSSKEKSRSKTVS-

>DmelGluRIIB

MHGLQFLVLLALAIASGANEDTLVIKIGAIFFDTEMKLADAFSAALEEVNAINPALKLDAI  
KRYVTVDDSIVLQDISCDLIGSGVAAIFGPSSKTNSDIVEVLCNMTGIPHLQFDWHPQQSNR  
ERMNHQLTVNVAPMELFLSAAFSDILASKTFDWSFTIAYERSSSHILRLQHILAWKQLHKA  
GIKMQEFERGGDYRILWKRINNAREKFVLLDCPSDILVDVINASIGYNMTGSFNHLFLTNL  
DTHLSGIDGFYSRDFTVAVAAVRIRTYVPPPVHDEIDVFDNSVDTRFSSLGSQLVYDSIVLF  
YNALLEISQRPGFYIPNFSCGRGFVWQPGPRLVEQMKQITPKMVKPPFKTQRLQINADGQRE  
DFNLEVYNPIIDRVTHIWNKEFQLVDFEKLRENSTQALKQKRLQNKEDFSQKPIRYTVATR  
VGKPYFSWREEPEGVHYEGNERFEGYAVDLIYMLAQECKFDNFEPVRDNKYGSYDANT  
DEWDGIIRQLIDNNAQIGICDLTITQARRSVVDFTVPPMQLGISILSYKEPPPKADIYAFLNP  
YNAEVWLFVMIAMMITAFALIFTGRIDQYEWDPVENVNREMERQNIWHLNLSALWLVLG  
SMLNQGCDLLPRGLPMRLTAFWWIFALLISQTYIAKLAAFITSSKIAGDIGSLHDLVDQNK  
VQFGTIRGGATSVYFSESNDTDNRMAWNKMLSFKPDAFTKNNEEGVDRVKLSKGTYAFL  
METTNLQYYVQRNCELTQIGESFGEKHYGIAVPLNADFRSNLSVGILRLSERGELFKLRNK  
WFNSNESTCDSNVPTIDDGQFDMDSVGGLFVVLIVGVVGLVIGVAEFLWHVQRISVKEK  
IPPMLALKAEFYFVIRFWLTKPLHTYRQSRDSTSTGYSSLEQITSASSAKKKKTRRIEK-

>DmelClumsy

MYSLFLTHFLLIAPVLADIDRSQFMVGSIFTSKDESEIAFRTAVDRANILERNVELVPIVV  
YANTDDSFIMEKMCNLSISQGVIAIFGPSTGSSSDIISICDTLDIPHIVYDWIPNESIPDREH  
STMTLNVHPDNLILLSQGLAEIVQSAWRSFTVYETDKELQQLQDILQVGEPISTPTTVKQ  
LGPDDHRPFLKEIKLSTDNCLILHCAPDNLLKILQQANELKMLGEYQSVFIPLDTHSIDF  
GELSGVEANITTVRLMDPSDFHVKNVVDHWEEREKREGRYFKVDPNRVKSQMILLNDAV  
WLFSKGLTELGIFEELTAPDLECRKPKPWPFGKRIIEFIKARSEETSTGRIDFNENGQRSFFT  
LRFMELNSDGFLDLATWDPVNGLDVLNDDEESEKRVGQKLSNKTIVSSRLGAPFLTLREP  
QEGEILTGNSTRYEGYSIDLINEIAKMLNFKFEFRMSPDGKYGALNKVTQTWDGIVRQLIDG  
NADLGICDLTMTSSRRQAVDFTPPFMTLGISILFSKPPTPPTDLFSFLSPFSLDVWIYMGSA

LFISLLLALARMAPDDWENPHPCKEPEEVENIWSIMNTTWLSIGSLMGQGCIDLPKAAST  
RLVTGMWWFFALMMLNSYTANLAAFLTNSRQANSINSAEDLAAQSKIKYGAMAGGSTM  
GFFRDSNFSTYQKMWTAMESASPSVFTKTNDGVERVQKGNLYAFLMESTTLEYNVER  
KCDLVQIGGWLDYKSYGIAMPFNSPYRKQISA AVLKLGELGQLAELKRKWWKEMHGGG  
NCEKSDDEDGGDTPELGLENVGGVFLVLGLGLLSAMVLGCTEFLWNVKSVAIEEKISLKEA  
FKSEALFAARIWITTKPVHTSSESGSSNSSSSSSSSSRKHSFKSQGLSMKSLKSSGYQDVEAS  
VHSKLKKIGSMFSLKSQKTVTPPEIGWKLDKSTQIDVVPTSDVDQELIPEVEPHLPHRHH  
HHHHHRHHHHHHHQPQDQEHDRNPSPPE-

>DmelGluRIID

MHFCWISLIILSLSRVQAQFYGGNAYEASSGQSIRLGLITDDATDRIRQTFEHAVISVNNEL  
GVPLVGETEQVAYGNSVQAFAQLCRLMQSGVGAVFGPAARHTASHLLNACDSKDIPFIYP  
HLSWGSNPDGFNLHPSPEDIANALYDIVNQFEWSRFICYESA EYLKILDHLMTRYGIKGP  
VIKVMRYDLNNGNYKSVLRRIRKSEDSRIVVVGSTTGVAELLRQAQQVGMNEDYTYII  
GNLNLHTFDLEEYKYSEANITGIRMFSPDQEEVRDLMEKLNHQLGESEPVNSGSTFITME  
MALTYPDVRVIAETTKHLPYQPQMLNCSERHDNVQPDGSTFRNYMRSLEIKEKTITGRIYF  
EGNVRKGFTHDVIELQTSGLVKVGTWEEGKDFEFQRPPQAVNFNDIDDGSLVNKTFIVLIS  
VATKPYASLVESIDTLIGNNQFQGYGVDLIKELADKLGFNFTFRDGGNDYGSFNKTTNSTS  
GMLKEIVEGRADLAITDLTITSEREEVIDFSIPFMNLGIAILYVKPQKAPPALFSFMDPFSSEV  
WLYLGIAYLGVSLCFFIIGRLSPIEWDNPYPCIEEPELENQFTINNSLWFTTGALLQQGSEI  
APKALSTRTISAIWWFFTLIMVSSYTANLAAFLTIENTPTSPINSVKDLADNKDDVQYGAKR  
TGSTRNFFSTSEPIYIKMNEYLNAPPEMLMENNQQGVDKVKSGTKYAFLMESTSIEFNT  
VRECNLTKVGDPLDEKGYGIAMVKNWPYRDKFNKALLELQEQV LARLKNKWWNEVG  
AGVCSAKSDDDGPSELGVDNLSGIYVVLVIGSIIISIIILCWCYFVYKKAKNYEVPFCDAL  
AEEFRIVIRFSENERPLKSAQSIYSRSRNSSQSIESLKT DSEENMPVED-

>DmelGluRIIE

MFFNHVFILWSLFSIHISVNWAQYENFGGYDNYQSLESVPIGLLTDQNTEQMNIVFDHAID  
VANQEVGTSLSLKEEVNYGDAYQSYGKLCRMLLETGIAGVFGPSSRHTAVHLMSICDAMD  
IPHIYSYMSENAEGFNLHPHPADLAKALYSLITEFNWTRFIFLYESA EYLNILNELTTLMLGK  
SGTVITVRLYDMQLNGNYKQVLRVRKSVDNRIVVVGSSSETMPEFLNQAQQVGIINEDY  
KYIIGNLDFHSFDLEEYKYSEANITGLRFLSPEKMAVKELLMKLGYP TDQDEFNRNGSCPIT  
VEMALTYDAVQLFAQTLKNLPFKPMPQNCQRTE SVRDDGSSFKNYMRTLRLTDRLLTGP  
IYFEGNVRKGYHLDVIELQPSGIVKVGTWDEDRQYRPQRLAPTTAQFDSVDNSLANKTFII  
LLSVPNKPYAQLVETYKQLEGNSQYEGYGVDLIKELADKLGFNFTFVNGGNDYGSYNKS  
TNESTGMLREIMTGRADLAITDLTITSEREQALDFTIPFMNLGIAILY LKPKATPELFTFMD  
PFSEEVWWFLGFSFLGVSLSFFILGRLSPSEWDNPYPCIEEPELENQFTLGN SIWFTTGAL  
LQQGSEIGPKALSTRTVASFVWWFFTLIVVSSYTANLAAFLTIEKPQSLINSVDDLADNKDGV  
VYGAKKTGSTRNFFMTSAEERYKKMNKFMSENPQYLTEDNMEGVNRVKTNTHYAFLME  
STSIEYNTKRECNLKKIGDALDEKGYGIAMRKDWPHRGKFNNALLELQEQGVLEKMN  
KWWNEVGTGICATKEDAPDATPLDMNNLEGVFFVLLVGS CCALLYGIISWVLFVMKKAH  
HYRVPLRDALKEEFQFVIDFN NYVRVLKNSASIYSRSRQSSMSVASVAQESQ-

>DmelCG3822

MRSSGVLVLP LLLLQLILNCRKAQSLPDIKIGGLFHPADDHQELAFRQAVDRINADRSILPR  
SKLVAQIERISPFDSFHAGKRVCGLLNIGVAAIFGPQSSHTASHVQSICDNMEIPHLENRWD  
YRLRRESCLVNLYPHPNTLSKAYVDIVRHGWGKTFTIYENNDGIVRLQELLKAHG MTPF

PITVRQLSDSGDYRPLLKQIKNSAEAHIVLDCSTERIHEVLKQAQQIGMMSDYHSYLVTSL  
DLHTVNLDEFYGGTNTITGFRLINEKIVSDVVRQWSIDEKGLLRSANLTTVRSETALMYDA  
VHLFAKALHDLDSQQIDIHPISCDGQSTWQHGFSLINYMKIVEMKGLTNVIKFDHQGFRT  
DFMLDIVELTPAGIRKIGTWNSTLPDGINFTRTFSQKQOEIANLKNKTLVVTILSNPYCM  
RKESAIPLSGNDQFEGYAVDLIHEISKSLGFNYKIQLVPDGSYGLNKLTEWNGMIRELLE  
QRADLAIADLTITFEREQAVDFTTPFMNLGVSYLYRKPIKQPPNLSFSLPLSLDVWIYMATA  
YLGVSVLLFILAKFTPYEWPAYTDAHGEKVESQFTLLNCMWFAIGSLMQGCDFLPKALS  
TRMVAGIWWFFTLMISSYTANLAAFLTVERMDSPIESAEDLAKQTRIKYGALKGGSTAAF  
FRDSKISTYQRMWSFMESARPSVFTASNGEGVERVAKGKGSYAFLMESTSIEYVTERNCEL  
TQVGGMLDTKSYGIATPPNSPYRTAINSVILKLQEEGKLHILKTKWWKEKRGGGKCRVET  
SKSSSAANELGLANVGGVFVFLMGGMGVACVIAVCEVWKSARKVAVEERLSAILNE-

>DmelCG5621

MISTEASFPLGFILTSLLLAFPGCRGERTNVGLVYENTDPDLEKIFHLAISKANEENEDLQLH  
GVSVSIEPGNSFETSKKLCCKMLRQNLVAVFGPTSNLAARHAMSICDAKELPFLDTRWDFG  
AQLPTINLHPHPATLGVALRDMVVALGWESFTIYESGEYLPTVRELLQMYGTAGPTVTVR  
RYELDLNGNYRNLRRIRNADDFSFVVVGSMTLPEFFKQAQQVGLVTSYRYIIGNLDW  
HTMDLEPYQHAGTNTITGLRLVSPDSEQVQEVAKALYEESEPFQNVSCPLTNSMALVYDGV  
QLLAETYKHVNFRPVALSCNDDSAWDKGYTLVNYMKSLLNLGLTGPIRFDYEGLRTDFKL  
EVIELAVSGMQKIGQWSGEDGFQENRPAPAHSLPEPDMRSLVNKSFVVITAISEPYGMLKET  
SEKLEGNDQFEGFGIELIDELSKKLGFSYTWRLQEDNKYGGIDPKTGEWNGMLREIIDSRA  
DMGITDLTMTSERESGVDFITIPFMSLGIGILFRKPMKEPPKLSFMSPFSGEVWLWLGLAY  
MGVSISMFVLGRLSPAEDWNPYPCIEEPTLENQFSFANCLWFSIGALLQQGSELAPKAYS  
TRAVAASWFFTLILVSSYTANLAAFLTVESLVTPINDADDSKNKGGVNYGAKIGGATFN  
FFKESNYPTYQRMYESMRDNPQYMTNTNQEGVDRVENSNYAFLMESTTIEYITERRCTLT  
QVGALLDEKGYGIAMRKNWPYRDTLSQAVLEMQEQLLTKMKTWWQEKRGGGACS  
DADEDSGAVALEISNLGGVFLVMGVGSFFGIFVSLLEMVLGVKERSDENQEAPDSDASSL  
GFANLGGVYLVFMVGVSCFGSIYGLVNCVVSVYLARENKVSFKTELLDEIRFILQCSGNTK  
AVKYPKNSSRSNASSKSKGSSMSVDSLPEDETSEADASGKHNHGKK-

>DmelCG9935

MLIASGFLLFQFLSYGLGVPLVVRIGAIKSNQPGMYNSELAFRYAIHRLNMDKSLLPETTVD  
YYVEYVNRFDSEFTVQKVCKLIRVGVQAVFSPTDSVLATHINSICDALDIPNIGRSAHDFSI  
NVYPSKQLVNYAFNDVIQYLNWTRFGILHEKENGIIINLHQLRSRSHGEVHMRQVSRDSYV  
SALNEFKGKEIHNIIDTNSNGISILLKNILQQQMNEYKYHYLFTSFDLETYDLEDFKYNFV  
NITSFRLVDTADVGVKQILKDIGLYSHHIFKPYLNLHIKKSSTILESEPALMFDSVYVFAIGL  
QTLEQSHSLTLLNISCEEENSWDGGLSLINYLNAVEWKGLTGPIQFKDQQRVQFKLDLKL  
KQHSIVKVGWTPHGHNLITEPSMFFDAGSMNVTLVVITILETPYVMMHYGKNFTGNERNF  
YGFCDILETISREVGFDYILDVLPDRKYGAKDPETGEWNGMVAQLMKYKADLAVGSMT  
ITYARESVIDFTKPFMNLGISILFKVPTSEPTLRFSDMNPLAIEIWIYVLIAYFLVSLCIYIVGK  
LSPIEWKCINACDLENISIGNQFSLTDSFWFTIGTFMQQSPDIYPRAMSTRIISSTWGFSLIIV  
ASYTANLAAFLTTERMINPIENAEDLASQTEISYGTLDGSGSTMTFFRDSVIETYKKIWRSM  
NKKPSAFTTTTYEDGIKRVNQGNYAFLMESTMLDYIVQRDCNLTQIGLLDTKGYGIATPK  
GSPWRDKISLAILELQERGDIMLYDKWWKNTDETCTRKNKTSKQSKANSLGLESIGGVFV  
VLIAGIIVA AVVAFFEFWYNFRYNYEATPSQSVVNNKYNQDGILESERNYTPPDRSFWIEIA  
EELRYASWCMNKQKRPALTRTCSKCTIPKGRINKL-

>DmelCG11155

MVRKKREIVIKENIQGRSYLKKICCSYIILSILVISNALPPVIRVGAIFTEDERESSIESAFKYAI  
YRINKEKTLLPNTQLVYDIEYVPRDDSFRTTKKVCSQLVQVQAIQFGPTDALLASHVQSIC  
EAYDIPHIEGRIDLEYNSKEFSINLYPSHTLLTLAYRDIMVYLNWTKVAIIYEEDYGLFNLM  
HSSTETKAEMYIRQASPDSYRQVLRRAIRQKEIYKIIVDTNPSHIKSFRRSILQLQMNDHRYH  
YMFTTFDLETYDLEDFRYNSVNITAFRLVDVDSKRYLEVINQMQLQHNGLDTINGSPIYIQ  
TESALMFDSVYAFANGLHFLNLDNHQNFYIKNLSCTSDQTWNDGISLYNQINAAITDGLTG  
TVQFVEGRRNIFKLDILKQKQEKIQKVGYPHPDDGVNISDPTAFYDSNIANITLVVMTREE  
RPYVMVKEDKNLTGNLRFEGFCIDLLKAIATQVGFQYKIELVPDNMYGVYIPETNSWNGI  
VQELMERRADLAVASMTINYARESVIDFTKPFMNLGIGILFKVPTSQPTRLFSFMNPLAIEI  
WLYVLAAYILVSFALFVMARFSPYEWKNPHPCYKETDIVENQFSISNSFWFITGTFLRQGS  
GLNPKATSTRIVGGCWWFFCLIISSTANLAAFLTVERMISPIESASDLAEQTEISYGTLEGG  
STMTFFRDSKIGIYQKMWRYMENRKTAVFVKTYEDGIKRVMEGSYAFLMESTMLDYAVQ  
RDCNLTQIGGLLDSKGYGIATPKGSPWRDKISLAILELQEKGIQILYDKWVKNTGDVCNR  
DDKSKESKANALGVENIGGVFVLLCGLALAVVVAIFEFCWNSRKNLNTENQSLCSEMA  
EELRFAMHCHGSKSRHRPRKRSCLNCSSVPTYVPSNVSTSNVGVYYNYFN-

>DmelGlu-R1

MHSRLKFLAYLHFICASSIFWPEFSSAQQQQQTVSLTEKIPLGAIFEQGTDDVQSAFKYAML  
NHNLNVSSRRFELQAYVDVINTADAFKLSRLICNQFSRQVYSMLGAVSPDSFDLHYSNT  
FQMPFVTPWFPEKVLAPSSGLLDFAIMRPDYHQAIIDTIQYQYGWQSIYLYDSHDGLLRQ  
QIYQELKPGNETFRVQMVKRIANVTMAIEFLHTLEDLGRFSKRRIVLDCPAEMAKEIIVQH  
VRDIKLRRTYHYLLSGLVMDNHWPSDVVEFGAINITGFRIVDSNRRAVRDFHDSRKRLE  
PSGQSQSQNAGGPNLPAISAQAALMYDAVFLVEAFNRILRKKPDQFRSNHLQRRSHGG  
SSSSSATGTNESSALLDCNTSKGWVTPWEQGEKISRVLKVEIDGLSGEIRFDEDGRRINYT  
LHVVEMSVNSTLQQVAEWRDDAGLLPLHSHNYASSRSASASTGDYDRNHTYIVSSLLEE  
PYLSLKQYTYGESLVGNDRFEGYCKDLADMLAAQLGIKYEIRLVQDGNYGAEQYAPGG  
WDGMVGEIRKEADIAISAMTITAERERVIDFSKPFMTLGISIMIKPKVKQTPGVFSFLNPLS  
QEIWISVILSYVGVSVLYFVTRFPPYEWRIVRRPQADSTAQQPPGIIGGATLSEPQAHVPPV  
PPNEFTMLNSFWYSLAAFQQGCDITPPSIAGRIAAVWWFFTIILISSYTANLAAFLTVER  
MVAPIKTPEDLTMQTDVNYGTLTYGSTWEFFRRSQIGLHNMWEYMNANQHHSVHTYD  
EGIRRVRSKQKGYALLVESPKNEYVNARPPCDTMKVGRRNIDTKGFGVATPIGSPLRKRLE  
AVLTLKENGELLRIRNKWWFDKTECNLDQETSTPNELSLSNVAGIYYILIGLLLAIVIVAIM  
EFFCRNKTPQLKSPGSNGSAGGVPGLASSTYQRDSLSDAIMHSQAKLAMQASSEYDER  
LVGVELASNVRYQYSM-

>DmelGlu-R1B

MRFGKLSCLWPSFLLWLTWSSGGGGGSGVGVSAQPSLTKIPLGAIFEQGTDEVQSAFK  
YAMLNHNLNVSSRRFELQAYVDVINTADAFKLSRLICNQFSRQVYSMLGAVSPDSFDLH  
SYSNTFQMPFVTPWFPEKVLTPSSGFLDFALSMRPDYHQAIIDTIQFYGWRKIYLYDSHDG  
LLRLQQIYQGLRPGNESFQVELVKRISNVSMIEFLHTLEQIGRFENKHIVLDCPTMAKQI  
LIQHVRDLRGRRTYHYLLSGLVMDDRWESEIIEFGAINITGFRIVDTNRRLVREFYDSWK  
RLDPQMSVGAGRESISAQAALMYDAVFLVEAFNKILRKKPDQFRNNVQRRSQTLMVAQ  
AAASTSSDGYNYSASGGGGGNGGAGGGFAGSDSGGSGGMASRALDCNTAKGWVNAWE  
HGDKISRYLRKVEIEGLTGDIKFNDGRRVNYTLHVEMTVNSAMVKAEWND DAGLQP  
LNAKYVRLRPHVEFEKNRTYIVTTVLEOPYIMLKQVAFGEKLGNNRFEGYCKDLADLLA

KELGINYELRLVKDGNYGSEKSSAHGGWDGMV GELVRKEADIAIAAMTTAERERVIDFS  
KPFMSLGISIMIKKPVKQTPGVFSFMNPLSQEIWVSVIFS YIGVSIVLFFVSRFSPHEWRLVQ  
QQPQQSQSPDPHAAHHEQLANQQPPGIIGGAPLPAPP GPPTPGAQTAAGAAALQAALSAGSP  
GSGGSSSAVVNEFSVWNSFWFLAAAFMQQCDLSPRSVSGRIAAASWFFFTLILISSYTAN  
LAAFLTVERMVTPINSPEDLAMQTEVQYGTLLHGSTWDFFRRSQIGLHNKMWEYMNSRK  
HVFVPTYDEGIKRVNRNSKGKYALLVESPKNEYVNAREPCDTMKVGRNLDTKGFGIATPLG  
SALKDPINLAVLTLKENGELIKLRNKWWEKAECSTHKDGETSHSELSLSNVAGIFYILIGL  
LLVSVFVAILEYCFRSDRSASSGSGMGLGMGLGGGMSGSLGKANGSMMLGPSSAVP  
GGMPSSHQRSTLTDTMHAKAKLTIQASRDYDNGRVGYLNCASLQYYPPAQLSATPPDAG  
DSLHMNAHGQV

>DmelNmdar2

MMPSRVKLRGTDGPTPTPTMPTTMRKHTPIATLNTASCQHNSTTSRRKRILTPPSGPISL  
LLLTVLTLLILDTRSCQGLRLTNGGGSLSKGAANKEQLNIGLIAPHTNFGKREYLR SINNA  
VTGLTKTRGAKLTFKDY SFEQKNIHFDMMSLTPSPTAILSTLCKEFLRVNV SAILYMMNN  
EQFGHSTASAQYFLQLAGYLGIPVISWNADNSGLERRASQSTLQLQLAPSIEHQSAAMLSI  
LERYKWHQFSVVT SQIAGHDDFVQAVRERVAEMQE HFKFTILNSIVVTRTSDLMELVNSE  
ARVMLLYATQTEAITILRAAEEMKLTGENYVWVVSQSVIEKKDAHSQFPVGM LGVHFDT S  
SAALMNEISNAIKIYSYGEAYLTD PANRRRLTTQSLSCEDGRGRWDNGEIFFKYLRNV  
SIEGDLNKPNI EFTADGDLRSAELKIMNLRPSANNKNLVWEEIGVWKS WETQKLDIR DIA  
WPGNSHAPPQGVPEKFHLKITFLEEAPYINLSPADPVSGKCLMDRGVLCRVAADHEMAAD  
IDVGQAHRNESFYQCCSGFCIDLLEKFAEELGFTYELVRVEDGKWGTLENGKWNGLIADL  
VNRKTDMLVLTSLMINTEREAVVDFSEPFMETGIAIVAKRTGIISPTAFLEPFDTASWMLVG  
IVAIQAATFMIFLFEWLSPSGYDMKLYLQNTNVT PYRFSLFRTYWLWVAVLFQAAVHV DSP  
RGFTSRFMTNVWALFAV VFLAIYTANLAAFMITREEFHESGLNDSRLVHPFSHKPSFKFG  
TIPYSHTDSTIHKYFNVMHNYMRQYNKTSVADGVA AVLNGNLDSFIYDGTVLDYLVAQD  
EDCRLMTVGSWYAMTGYGLAFSRNSKYVQM FNKRLL EFRANGDLERL RRYWMTGT CR  
PGKQEHKSSDPLALEQFLSAFLLLMAGILLAALLLLEHVYFKYIRKRLAKKDG GHCCALI  
SLSMGKSLTRGAVFEATEILKKHRCNDPICDTHLWKVKHELDMSRLRVRQLEKVM DKH  
GIKAPQLRLASSD LLNHHHLKERPPLLGNLSLAASAQDLYRWSYKTEIAEMETVL-

>DmelNmdar1

MAMAEVFCRPLFGLAIVLLVAPIDAAQRHTASDNPSTY NIGGVLSNSDSEEHFSTTIKHLN  
FDQQYVPRKVTYYDKTIRMDKNPIKTVFNVC DKLIENRVYAVVVSHEQTS GDLSPAAVSY  
TSGFYSIPVIGISSRDAAFSDKNIHVSFLRTVPPY YHQADVWLEMLSHFAYTKVIIIHSSD TD  
GRAILGRFQTTSQTYDDVDVRATVELIVEFEPKLESFTEHLIDMKTAQSRVYLMYASTED  
AQVIFRDAGEYNMTGEGHVWIVTEQALFSNNTPDGVLGLQLEHAHSDKGHIRDSVYVLA  
SAIKEMISNETIAEAPKDCGDSAVNWESGKRLFQYLKSRNITGETGQVAFDDNGDRIYAGY  
DVINIREQQKKHVVGKFSYDSMRAKMRMRINDSEIHWPGKQRRKPEGIMIPHTLRLLLTIEE  
KPFVYVRRMGDDEFRCPEPDERPCPLFNNSDATANEFCRGCIDLLIELSKRINFYDLALS  
PDGQFGHYILRNNTGAMTLRKEWTGLIGELVNERADMIVAPLTINPERAEYIEFSKPFKYQ  
GITILEKKPSRSSTLV SFLQPFSNTLWILVMVSVHVVALVLYLLDRFSPFGRFKLSHSDSNEE  
KALNLSSAVWFAWGVLNLSGIGEGTPRSFSARVLGMVWAGFAMIIVASYTANLAAFLVLE  
RPKTKLSGINDARLRNTMENLTCATVKGSSVDMYFRRQVELSNMYRTMEANNYATAEQA  
IQDVKKGKLMAFIWDSSRLEYEASKDCELVTAGELFGRSGYGIGLQKGGSPWTD AVTLAIL  
EFHESGFMEKLDKQWIFHGHVQQNCELFEKTPNTLGLKNMAGVFILVGVGIAGGVGLIIE

VIYKKHQVKKQKRLDIARHAADKWRGTIEKRKTIRASLAMQRQYNVGLNSTHAPGTISL  
AVDKRRYPRLGQRLGPERAWPGDAADVLRIRRPYELGNPGQSPKVMAANQPGMPMPML  
GKTRPQQSVLPPRYSPGYTSDVSHLVV-

>DmelIR8a

MELPLLVLALLALRFAGSEVLKITFWIEPVQRAEFDTDIAMVLKELDALRLDVKVDDTTTLT  
TRSEDGLDMQRFCEILSTVGASAVIDLTYSHWEEGYNLVRSLSLGIGYVRLERIMRPFLDMFG  
DFMRQKRANNVAMVFMNARDAVEAMQQMLVGYPPFRTLIMDASQTDPGQHFLERIRSLR  
PAPTYIALFARAAAMNGIFEKVQKADLFQRPLEWHFVFLDTRDRVFKYRRQAELECTRFTL  
NPRAICRSMPPDLYCGSGFTMQRAMLLNVLRSNLINAAQVSPGYPLAIYQDCNATASSE  
VSDPLEKDDYNWLDMVHWSNFLAYAPPLPHIQDQFQSPVPGLTFAVNISAGYYSSEHEAK  
TDLAAWSSVGMRLNETISPARRFFRIGTAESIPWSYLRREEGTGELIRDRSGLPIWEGYCI  
DFIIRLSQKLNFEFEIVAPEVGHMGELNELGEWDGTVVGDVLRGETDFAIAALKMYSEREEV  
IDFLPPYYEQTGISAIIRKPVRTSLFKFMTVLRLEVWLSIVAALVGTAIMIWFMDKYSPYSS  
RNNRQAYPYACREFTLRESFWFALTSFTPQGGGEAPKAISGRMLVAAAYWLFVLMLATFT  
ANLAAFLTVERMQTPVQSLEQLARQSRINYTVVKDSPTHQYFVNMKFAEDTLYRMWKE  
LALNASKDFKKFRIWDYPIKEQYGHILLAINSSQPVADAKEGFANVDAHENADYAFIHDSA  
EIKYEITRNCNLTEVGEVFAEQPYAVAVQQGSHLGDELSYAILLQKDRFFEELKAKYWNQ  
SNLPNCPLESDQEGITLESLLGGVFIATLFGVLAMMTLGMEVLYYKKKQNALEITQVRPVN  
DSSGSGGNSSTAPPTATSTTKQAWHIPVLEAEEKPAKVSPPPSFETATFRGKKLPARITLGDG  
KFKPRHGLYARRNLGASDSHSGYME-

>DmelIR25a

MILMNPKTSKILWLLGFLSLLSSFSLEIAAQTTQINVLFINEVDNEPAAKAVEVVLTYLKK  
NIRYGLSVQLDSIEANKSDAKVLEAICNKYATSIEKKQTPHLLDITTKSGIASSETVKSFTQA  
LGLPTISASYGQGDRLQWRDLDEAKQKYLQVMPADIPEAIRSIVIHMNITNAAILYDD  
SFVMDHXYKSLQNIQTRHVITAIKDGKREEREEQIEKLRNLDINFFILGTLQSIRMVLES  
VKPAYFERNFAWHAITQNEGEISSQRDNATIMFMKPMAYTQYRDRLGLLRTTYNLNEEPQ  
LSSAFYFDLALRSFLTIKEMLQSGAWPKDMEYLNCDDFQGGNTPQRNLDLDRDYFTKITEP  
TSYGTFDLVTQSTQPFNGHSFMKFEMDINVLQIRGGSSVNSKSKWISGLNSELIVKDEE  
QMKNLTADTVYRIFTVVQAPFIMRDETAPKGYKGYCIDLINEIAAIVHFDYTIQEVEDGKF  
GNMDENGQWNGIVKMLMDKQADIGLGSMSVMAEREVIDFTVPYDYLGVITIMMQRPS  
PSSLFKFLTLETNVWLCILAAFFTSFLMWIFDRWSPYSYQNNREKYKDDEEKREFNLKE  
CLWFCMTSLTPQGGGEAPKNLSGRLVAATWWLFGFIIIASYTANLAAFLTVSRLDTPVESL  
DDLAKQYKILYAPLNGSSAMTYFERMSNIEQMFYEIWKDLSLNDSLTAVERSKLAVWDYP  
VSDKYTKMWQAMQEAKLPATLDEAVARVRNSTAATGFAFLGDATDIRYLQLTNCDLQVV  
GEEFSRKPYAIAVQQGSHLKDQFNAILTLLNKRQLEKLKEKWWKNDEALAKCDKPEDQ  
SDGISIQNIGGVFIVFVIGMACITLVFEYWWYRYRKNPRIIDVAEANAERSNAADHPGKL  
VDGVILGHSGEKFEKSKAALRPRFNQYPATFKPRF-

>DmelIR21a

MSYYWVALVLFTAQAFSIEGDRSASYQEKCSRRLINHYQLNKEIFGVGMCDGNNEFR  
QKRRIVPTFQGNPRPRGELLASKFHVNSYNFEQTNLSLVGLVNKIAQEYLNKCPPVIYYDSF  
VEKSDGLILENLFKTIPTFYHGEINADYEAKNKRFTSHIDCNCKSYILFLSDPLMTRKILGP  
QTESRVVLVSRSTQWRLRDFLSSELSSNIVNLLVIGESLMADPMRERPYYVLYTHKLYADGL  
GSNTPVVLTSWIKGALS RPHINLFPKFKQFGFAGHRFQISAANQPPFIFRIRTLDSGGMGQLR  
WDGVEFRLLTMISKRLNFSIDITETPTRSNTRGVVDTIQEIQIERTVDIGMSGIYITQERLMD



SAMSVGHSPDCAAFITLASKALPKYRAIMGPFQWPVWVALICVYLG GIFFIVFTDRLTSLH  
LMGNWGEVENMFWYVFGMFTNAFSFTGKYSWSNTRKNSTRLLIGAYWLFTIIITSCYTGS  
IIAFVTLPAFPDVTVDSDLGLFFRVGTLNNGGWETWFQNSTHIPTSRLYKKMEFVGSVD  
EGIGNVTQSFFWNYAFLGSKAQLEYLVQSNFSDENISRRSALHLSEECFALFQIGFLFPRES  
VYKIKIDSMILLAQQSGLIAKINNEVSWVMQRSSSGRLLQASSNSLREIIQEERQLTTADT  
EGMFLLMALGYFLGATALVSEIVGGITNKCRQIIKRSRKSAASSWSSASSGSMRLRTNAEQL  
SHDKRKANRREA AEVAQKMSFGMRELNLRATLREIYGSYGAPETDHGQLDIVHTEFPNS  
SAKLNNIEDEESREALESLQRLDEFMDQMDNDGNPSSHTFRIDN-

>DmelIR31a

MNLLISMFILILAAGEGEIIPSMEESSVVTNFVKS LSVKTKQAIVFSCLFKDFKEISLALMRINQ  
FVSVVNLNQSYSLTSILTRENARTSVMVNARCSGSSELLFEASENRYFNKTYQWFLWGV  
DLEVQSLFPLNLNYVGPNAQITYVNETADGYAYWDIHSKGRHLKSNLEINLIATLINDTLNI  
ARDIFHLQSIDFRGQFNGLTLRGASVIDKEDIISNEQIESILSRPTKDAGVAAFIKYHYELLG  
LLRERFNFTVNFNRNRGWAGRLGNTTFRLLGIVMRNEADIAASGAFNRINRFAEFDTIH  
QSWKFFETAFLYRYTSDLDTHGKSGNFLSPFSDRVWLFCLLTLGAFSIIWVLFEEIDYKILRIR  
VNSQKLEHLNQKSSVICIKTTCIERILQTFGACCQQGLDPNPVDRSVRFLVMTLFLFLSVM  
YNYTSSVVGGLSSSDQGPSTVDEITASPLKISFEDIGYYKVLFRSQNRSITRLIEKKLSS  
SRSLNELPIFSHIEDAVPYLKAGGFAFHCEVVDAYPWISEYFDANEICDLREVSGLMEVEIL  
NWILHKNSQYTEIFKTAMCNAQEKGFVERILRRRQIKKPACQSLYTVYPVSLSGVLPGFVI  
LICKSINKFS-

>DmelIR40a

MHKFLALGLLPYLLGLLNSTRLTFIGNDESDTAIALTQIVRGLQSSLAIALPSLALSDGV  
CQKERNVYLDDFLQRLHRSNYKSVVFSQTELFQHIENLQGANECISLILDEPNQLLNSL  
HDRHLGHRLSLFIFYWGARWPPSSRVIRFREPLRVVVVTRPRKKA FRIYYNQARPCSDSQL  
QLVNWYDGDNLGLQRIPLPTALSVYANFKGRTFRVPVFHSPFWVWVTYCNNSFEEDDEF  
NSLDSIEKRKVRVTGGRDHRLMLLSKHMNFRFKYIEAPGRTQGS MRSEDGKDSNDSFTG  
GIGLLQSGQQADFFLGDVGLSWERRKAIEFSFFTLADSGAFATHAPRRLNEALAIMRPFKQ  
DIWPHLILTIIFSGPIFYGIIALPYIWRRRWANS DVEHLGELYIHMTYLKEITPRLLKLPRTV  
LSAHQMPHQLFQKCIWFTLRLFLKQSCNELHNGYRAKFLTIVYWIAATYVLADVYSAQLT  
SQFARPAREPPINTLQRLQAAMIHDGYRLYVEKESSLEMLENGTELFRQLYALMRQQVIN  
DPQGGFFIDSVEAGIKLIAEGGEDKAVLGGRET LFFNVQQYGSNNFQLSQKLYTRYSAVAVQI  
GCPFLGSLNNVLMQLFESGILDKMTAAEYAKQYQEVEATRIYKGSVQAKNSEAYSRTESY  
DSTVISPLNLRMLQGAFIALGVGSLAAAALNNTINVRSLNSRDKFCG GPVKIWYYLVLLL  
WYYFNRGLVGIYQLWHKTSIRNTGKGMPFLGE-

>DmelIR64a

MHWWLLVFLPLSCQGLPEHELLELELDYGLAEPQRTSLLQSSLILQFSQDYKHIPRITYFTC  
QKPHLQTPNQIPNAAEHRDAFAAKNFQLIKSLYESELFVRIVLLDVLAQSPTSGRPNRPGN  
GPTGGFSQTPSQAQSNSEWLEGVLRMEALRQIAVVDLACGAVSRRFLELASAKMLYSEKF  
HWLLIEDFAWHGRTQTAEGSGKRDDGEMEEEEPPGQQIQATDDEDLPSIESFLGGMNLYM  
NTELTAKRMSEAAHYTLFDVWNPGLNYGGHVNLTEIGSFTPTTEGIQLHTWFRITSTVRR  
RMDMQHARVRCMVVVTKNMTGTLMYYLTHTMSGHIDTMNRFNFNLLMAVRDMFNW  
TFVLSRTTSWGYVKNRFDGMIGALIRNETDIGGAPIFYWLERHKWIDVAGRSWSSRPCFI  
FRHPRSTQKDRIVFLQPFTNDVWILIVGCGVLTVFILWFLT TIEWKLVPHDGSALIKPKGGA  
PPRHYYQQQQQEQVEAPVRPITAVSVVVSKEKVEEKQEEYEDSTPIDAGTLWQRCYQKL

NKYIKDRKAKQKKAPERVGLFLESVLFVGIICQQQLGFSTSFVSGRCIVITSLLFSCFIYQF  
YSASIVGTLLMEKPKTIKTLSDLVHSSLKVGMEDILYNRDYFLHTKDPVSMELYAKKITSV  
PTTKENEADEDEPVDPNPVSTDPAKSYRDIVHSHETGAHAKDNAASNWLDPETGLLRVK  
HERFAFHVDVAAAYKIIAETFSEQDICDLTEVSMFPPQKTVSIMQKNSPMRKVISYGLRRVT  
ETGILTYHFNVWHSRKPPCVKKIETSDLHVDMDTVSSALLILLSYAITLMILGTEILYSKW  
HNRIQLKWVGAT-

>DmelIR75a

MQLVQLANFVLDNLVQSRIGFIVLFFHCWQSDESLKFAQQFMKPIHPILVYHQFVQMRGVL  
NWSHLELSYMGHTQPTLAIYVDIKCDQTQDLLEEASREQIYNQHYHWLLVGNQSKLEFY  
DLFGLFNISIDADVSYVKEQIQDNNDVAVAVHDVYNNNGKIIGGQLNVTGSHEMSCDPFVC  
RRTRHLSLQKRSKYGNREQLTDVVLRVATVVTQRPLTSDDELIRFLSQENDTHIDSLARF  
GFHLTLILRDLHCKMKFIFSDSWSKSDVVGGSVGAVVDQTADLTATPSLATEGRLKYLSA  
IETGFFRSVCIFRTPHNAGLRGDVFLQPFSPVWYLFGGVLSLIGVLLWITFYMECKRMQK  
RWRLDYLPSSLSTFLISFGAACIQSSSLIPRSAGGRLIYFALFLISFIMYNYTYSVVSSLLSS  
PVKSKIKTMRQLAESSLTVGLEPLPFTKSYLNYSRLPEIHLFIKRKIESQTQNPWLPAEQG  
VLRVRDNPGYVYVFETSSGYAYVERYFTAQEICDLNEVLFREPEQLFYTHLHRNSTYKELFR  
LRFLRILETGVRKQRSYVWHMKLHCVAQNFVITVGMMEYVAPLLMLICADILVVILLV  
ELAWKRFFTRHLTFHP-

>DmelIR75b

MNFSVLESHFKEAQIFVDADVITYVTHDPFSKNFLLYDVYNKGRQLGGELNITADREIFCN  
KTNCRVERYLSELYTRSALQHRKSFTGLTMRATAVVTALPLNVSIKEIFDFMNSKYRIQLDT  
YARLGYQARQPLRDMLDCKFKYIFRDRWSDGNATGGMIGDLILDKADLAIAPFIYSFDRA  
LFLQPITKFSVFREICMFRNPRSVSAGLSATEFLQPFSGGVWLTFAALLLAGCLLWVTFILE  
RRKQWKPSLLTSCLLSFGAGCIQGAWLTPRSMGGRMAFFALMVTSYLMYNYTYSIVVSK  
LLGQPIKSNIRTLQQLADSNLDVIGIEPTVYTRIYVETSEEPDVRDLYRKKVLGSKRSPDKIW  
IPTEAGVLSVRDQEGFVYITGVATGYEFVRKHFLAHQICELNEIPLRDASHTHTVLAKRSPY  
AELIKLSELRMLETGVHFKHERSWMETKLHCYQHNHTVAVGLEYAAPLFIILLGAILCMG  
ILGLEVIWHRHCTLH-

>DmelIR75c

MTSWPLYRLIVFNLEINLSNLMVFHCWSIKEAFPLVEMLNQNGIFSQYIDVQNPDLANV  
HKEYLDSLDVSLNADVITYVSREDEERFILHDVYNKGSHLGGKLNITVDQTLQCNRSHCQ  
VKEYLSELHLRPLRQHRMDLSSVTFRLAALVSVLPINSSEEELLEFLNSDRDSHMDSISRIG  
NRLIMHTQEILGFNVQDAFGGAIGMLTNESAELCTTPFVPSWNRLHYLHPMTEQAQFRAV  
CMFRTPHNAGIKAAVFLEPFMPVWFAFAGLLIFAGVLLWMIFHLERHWMQRCLDFIPSL  
SSCLISFGAACIQGSYLMPKSAGGRLAFIAVMLTSFLMYNYTYSIVVSTLLGSPVRSNIRTIQ  
QLADSSLDVGFDTVPFTKTYLVSSPRDIRSLYKQKVESKRDPNSVWLSPEEGVIRVRDQP  
GFVYTSEASFMYHFVEKHYPREISDLNEIILRPESAVYGMVHLNSTYRQLLTQLQVRMLE  
TGITSKQSRFFSKTKLHTFSNSFVIQVGMMEYAAPLFISLLVAYFLALLLILEICWARYAKKKF  
STIIPQNQ-

>DmelIR75d

MKVQVAHWLPLIFFLLVSGTTPRVAGSWRSEYSRQDPDPKTRWGNQLPDMLVAYYRHHGV  
HSLMLVVCHTDIADFRLWKLWQHFNLNIFYVQVSTESSLRDLQHVDALDEHKDAPPPKS  
FHANNSTHWETSFLPALPYKMGILLLEFSSECALNLLRWSAASEHNYFTTNRFWLLLTED  
PGDIDLLEDPEIFIPDSELRVLHYENVGNFSCSLIDLYKVAAWKPLKRTLTVGHNIRNSRHVI

HALQHFGSAITYRQDLEGIVFNSAIVIAFPDLFTNIEDLSLRHIDTISKVNHRLMLELANRL  
NMSYNTYQTVNYGWRQPNGSFDGLMGRFQRYELDLAQLAIFMRLDRIALVDFVAETYRV  
RAGIMFRQPPLSAVANIFAMPFENDVWVSILMLLIITTVVLVLELFFSPHNHDMSYMDTLN  
FVWGAMCQQGFYVEVRNRSARIIVFTTFVAALFLFTSFSANIVALLQSPSDAIQSLSDLGQS  
PLEIGVQDTQYNKIYFTESTDPVTKNLYHKKIASKGENIYMRPLLGMEKMRTGLFAYQVE  
LQAGYQIVSDTFSEPEKCGLMELEPFQLPMLAIPTRKNFPYKELIRRQLRWQREVS LVNRE  
ERKWIPQKPKCEGGVGGFV SIGITECRYALGIFGCGAAVSFVLFLFEFIFRHFQVYRIIKGY  
REVQR-

>DmelIR76a

MENLLVESYYFSTVLSFFAQFFADSHATCIFWHPAFDFRLETVHPMPLIIMDWHRWANRS  
DQDVYDYKIKEDEFEGKGIPYNDWTLRLTVAIERSHCETFIAFQEIQIPEFARYFYHASIYSI  
WRSLRNRFMFVYTKEFEDKKDSYLSGYIFQDQPNILVITSQYLNSTFEIKTNRFVGP RNFN  
KNPEPVEFYILQRFDAKGTKATWETQSAMSSKMRNLKGREVVIGIFYKPFMLLDYKPP  
LYYDRFMNTTVDVTIDGTDIQLMLIFCELYNCTIQVDTSEPYDWGDIYLNASGYGLVGMILD  
RRNDYGVGGMYLWYEAYEYMDMTHFLGRSGVTCLVPAPNRLISWTL LLLRPFQFVLWMC  
VMLCLLLESALGITRRWEHSSVAAGNSWISSLRFGCISTLKL FVNQSTNYVTSSYALRTVL  
VASYMIIDITTVYSGGLAAILTLP TLEEAADSRQRLFDHKL IWTGTSQAWITTIDERSADPV  
LLGLMEHYRVYDANLISAFSHTEQMGFVVERLQFGHLGNT ELIENDALKRLKLMVDDIYF  
AFTVAFVPRLWPHLNAYNDFILAWHSSGFDKFEWKIAAEYMNAHRQNRIVASEKTNLDI  
GPVKLGIDNFIGLILLWCFGMICSLTFLGELWRGQG-

>DmelIR76b

MATGIELLVAAAALCVACPLNDSPTNLIQMGENGTLSPVTELPMDVDASEAGFDADAPV  
ETLETINRKKPKLREMLDWIGGKHLRIATLEDFPLSYTEVLENGTRVGHGVVSFQIIDFLKKK  
FNFTYEVVVPQDNIIGSPSDFDRSLIEMVNSSTVDLAAA FIPSLSDQRSFVYYSTTTLDEGE  
WIMVMQRPRESASGSGLLAPFEFWVWILILV SLLAVGPIIYAL IILRNRLTGDGQQTPYSLG  
HCAWFVYGALMKQGSTLSPIADSTRLLFATWWIFITILTSFYTANLTAFLT LSKFTLPYNTV  
NDILTKNKH FVSMRGGGVEYAIRTTNESLSMLNRMIQNNYAVFSDETNDTYNLQ NYVEKN  
GYVFVRDRPAINIMLYRDYLYRKTVSFSDEKVHCPFAMAKEPFLKKKRTFAYPIGSNLSQL  
FDPELLHLVESGIVKHL SKRNLP SAEICPQDLGGTERQLRNGDLM MTTYIIMLAGFATALAV  
FSTELMFRYVNSRQEANKWARHGIGRTPNGQSVAPSRWLRGW RRLNSGHGQLLGASTHG  
QNVTPPPPYQSIFNGGSHGDPLNRWRRPLANGNALGN GVLLGGDSEGGVRRLLINGRDYM  
VFRNPNGQSQLVPVRSPSAALFQYSYTE-

>DmelIR84a

MIKLQVKVISWPLIILTAFLRVLQIESINTNFLELAA FEDFLRSEHLSHVLVVRGDDADGDW  
KIECHQKLLANYRVQFYRPEMSANFEDLMFYGSPRTAVLVLN SEHVLVRRQVFGVASEAG  
YFNNSLAWFILGSGRESLPVEQLIDQLLSGYRMGIDADITVALRGP DNASMLFYDVYRISR  
QANTPLIIEKKGLWTHSGGYQKFGNFKN TWVIRRRNFLNVT LIGSTVLTEKPPGFGDMEY  
LADDKQLQQLDPMQRKTYQLFQLVERMFNLSLAISLTDK WGE LLNDSWSGVMGQVTS  
READFAVCPIRFVLD RQPYVQYSAVLHTQNIHFLFRHPRRSHIKNIFFEPLSNQVWWCVLA  
LVTGSTILLFFHVRLE RMLSNMENRFSFVWFTMLETYLQQGP ANEIFR L FSTRLLISLSCIFS  
FMLMQFYGAFIVGSLLESARSIVNLQALYDSNLAIGMENISY NFPIFTNTSNQLVRDVYV  
KKICKSGEHNIMSLQQAERIIQGRFAFHTAIDRMYRLLLEL QMDEAEFCDLQEVMFNLP  
YDSGSVMPKGPWREHLAHALLHFRATGLLQYNDKKWMVRRPDCSLFKTSQAEVDLEH  
FAPALFALAMVASALVFLELFLHWLPDFRRRLGTMST-

>DmelIR92a

MLLQPLVMHLSQLLRIIVGQYFAEFPSSILIVYNNSASTTPLQLEYLSALELVLRELSKPIRLQ  
WINVAFLKDLNDLEDQVMGALNSSVTEGFITILSQTHHFIHARYYATRANANVRLKDKRYL  
FLCEDESPAELLCMDILQFYPHHLMVRPGTETAPTGTGPHDPDRRGGGASVSTKNKDDG  
EGGAGNKTTSPYRDINFELWTQKFVGVAVGNLDALLLDAFLPNETFANRVELYPNKLLNLQ  
RRSLLVGSITYVPYTITNYVPAGQGDVDPIHPQWPNRSLTFDGAEANVMKTFCQVHNCHL  
RVEAYGADNWGGIYDNESSDGMLGDIYEQRVEMAIGCIYNWYDGITETSHTIARSSVTIL  
GPAPAPLPSWRNIMPFNRAWLVLISTLVICGTFLYFMKYVSYRLRYSGTQVKFHHSRKL  
EKSMULDIFALFIQQPSAPLSFDRFAPRFFLATILCATITLNIYSGQLKSMLTFPFYSAPVDTIE  
KWAQSGWKWSAPSIIWVHTVQSSDLETEQILARNFEVHDYSYLSNVSFMPNYGFGIERLS  
SGSLVGDYVSTEALENRIVLHDDLYFDYTRAVSIRGWILMPELNKHIRTQETGLYFHWE  
LEFIDKYMDKKKQEVLMDLANGHKVKGAPQALDVRNIAGALFVLAFGVAFAGCALVAE  
LLIHRMDLSK-

>DmelIR93a

MNPGEMRPSACLALLLAGLQLSILVPTEANDFSSFLSANASLAVVVDHEYMTVHGENILAH  
FEKILSDVIRENLRNGGINVKYFSWNAVRLKKDFLAAITVTDCENTWNFYKNTQETSILLI  
AITSDCPRLPLNLRALMTVECRINAVFVDQTTILEENALLVKSIVHESITNHITPISLILYEIN  
DSLRGQQKRVALRQALSQFAPKKHEEMRQQFLVISAFHEDIIEIAETLNMFMHVGNGQWMIFV  
LDMVARDFDAGTVTINLDEGANIAFALNETDPNCQDSLNTISEISLALVNAISKITVEEESI  
YGEISDEEWEAIRFTKQEKQAEILEYMKFLKTNACSSCARWRVETAITWGKSQENRKF  
RSTPQRDAKRNRFEFINIGYWTPVLGFVCQELAFPHIEHFRNITMDILTVHNPPWQILTKN  
SNGVIVEHKGIVMEIVKELSRALNFSYYLHEASAWKEEDSLSTSAGGNESDELVGSMTFRI  
PYRVVEMVQGNQFFIAAVAATVEDPDQKPFNYTQPISVQKYSFITRKPDEVSRILYFTAPFT  
VETWFCLMGIILLTAPTLYAINRLAPLKEMRIVGLSTVKSCFWYIFGALLQGGMYLPTAD  
SGRLVVGFWWVIVVIVLVTTYCGNLVAFITFPKQPGVDYLNQLEDHKDQVYGLRNGTFF  
ERYVQSTTREDFKHYLERAKIYGSAQEEDIEAVKRGERINIDWRINLQLIVQRHFEREKEC  
HFALGRESFVDEQIAMIVPAQSAYLHLVNRHIKSMFRMGFIERWHQMNLPSAGKCNKSA  
QRQVTNHKVNMDDMQGCFLVLLGFTLALLIVCGEFWYRRFRASRKRQFTN-

>DmelIR7a

MFHHLWLLMGLRSLAMGALHPPQPEAMTPLVAAALEILAEQVSPSQSTLAVMDLTQDAE  
HRDERQEQLMTIILRSVGSEALRTFQKPPAEVPASFVVFLVNSAQAFNTLGFHFTDIHSTR  
EFNFLILLTHRMSSRAERLQVLRDISRTCVRFHSTSNVILLTEKRDGVVLVYAYRLLNMDCD  
LSVNLELIDIYKNGLFRHGHEARSFNRVLSLSGCPLQVSWYPLPPFVFIGNSSDPEERAQI  
WRLTGIDGELIKLLASIFDFRILLEPCNKCLSPDIKDDDCSGCFDQVIISNSSILIGAMSGSHQ  
HRSHFSFTSSYHQSSLVFMHMSQFGAVAQLAVPFTVIVWLALVSSLLLVLVLMRNRL  
VCGRSDLASHALQVLTLMGNPLEARSLPRSSRLRILYAGWLLLVLVLRVYQKGLFDSFR  
LPYHKPLPTEISELIRSNYTLINQEYLDYYPRELTVLTRNGSKDRFDYIQGLGKEGKFTTSL  
IATMEYYNMMHWSTSRSLTHIKEHIFLYQMVIYLRHSLLKFAFDRKIKQLLSAGIIGYFVRE  
FDACQYRKPFEEDYEVTPIPLDSFCGLYISLIWLSAAVVAFILELLSQIRVWLRRIFE-

>DmelIR7b

MKYWLYILSCCSLVA STMESSDWDLAEALAQVVANSEMGRFKTLYIYTHTNSQSTGGHL  
EELLDQVLMIVPNNLQARRLLLQQSMEYKPYVHAVLALVDGLPSSAIYARIRATQDLSHT  
LIYMSMPTDAYGEEMQATLRFWRVLSVLNVGVVLRPPGDHILMVSYPFALSALHGCQVISA  
NVVNRYQVGTKRWASQDYFPSKLGNYGCLLTCATWEDMPYLVWRPDGSGSFVGI EGAL

LQFMAENLNFTVGLYWMNKEEVLATFDESGRIFDEIFGHHADFSLGGFHFHKPSAGSEIPYS  
QSTYYFMSHIMLVTNLQSAYSAYEKLSFPFTPLWRAIGLVLILACLLMLLVRWRHHHEL  
PRNPYYELLVLTMGGNLEDRWVPQRFPSRLVLLTWLFATLVLRSGYQSGMYQLLRQDTQR  
NPPQTISEVLAQHFTIQLAEVNEARILASLPELRPEQLVYLEGSELQSFALAQQSGSSARVA  
ILTPYEYFGYFRKVHPMSRRLHLVRERIYTQQLAFYVRRHSHLVGVLNKQIQHAHTHGFL  
EHWTRQYVSAVDEKDESVARIASTSYSTLDGIDGDPSESEEDQQVAPVRQNVLSMREL  
AALFWLILWANLGAVVVFVLELLLPRIKLRKILRKMKKSTRASATTTSTLSSPSTTKDIPFS  
CKDGFQDSWPKCSLLVS-

>DmelIR7c

MLHSAVHNVS LVYALVW AIDNYYGMATSTPLAVVQFPTSRESRRLHNDLIDAALGRSSGT  
GRIQFLEDDR VEMTETD TDPPPPSGLTGRPIAIWFLDSLRSYFRLEMYLNQLGSPYKRNG  
FFLVIYTGLEDQPMESLKIMFRLLNMYVLNVNVLQRDGTVHLYTYYPYGPHEHCQSSLP  
VYYTAFQDLA APANGFGLTKPLFPRKLTNMHGCEMVVATFEHRPYVIIEDDPKTPGGRSIH  
GIEGLIFRSLAERMNFTIKLVEQKDKNRGEILPDGNFTGILKMMVDGEVNLTFVCFMYSKA  
RSDLMLPSTSYTSFPIVLVPSGGSSISPMGRLTRPFRYIWSCILVSLIFGFVLICLLKITALPGL  
RNLVLGRRNRLPFMGMWASLLGGLALYNPQRNFARYILVMWLLQTLILRAAYTGQLYLL  
LQDVEMRSPIKSLSEVLAKDYEFRILPALRTIFKDSMPTTNFHAVLSLEESLYRLREDDPGI  
TVALLQPTVNQFDFRSGPNKRHLTVLPDPLMTAPLTFYMRPHSYFKRRIDRLIMAMMSSGI  
VARYRKM YMDRIKRVSKRRNLEPKPLSIWRLSGIFVCCAGLYLVALIVFILEILT TNHRRLR  
RAFNVINRYAA-

>DmelIR7d

MDIRCVVALLGLCKVQAVVWPHQHLLLEEQLASQISATLQKIFINGLAVYNFGVFISTSYE  
EMDRDRVILVHQVLNRNLYPPNFPVAVVLASKMNRKITAQVFTQLLFVQNAEQAI AIAEG  
VNRNGLCVIVLLTSQPERPIMTKIFTYFMQERYNINVVILVPRLHG VQAFNVRPYTPTSCSS  
LEPVEIDIKDGLDWDVFPRLKNLHGCPLSVIVWDIPPYMRINWKSSDPMDGLDGLDGLL  
LRIVARKMNFTLKLIPNEPNGLIGGSSFMNGTFTGAYKMLRERRANITIGCAACTPERSTFL  
EATSPYSQMSYIIVLQARGGYSIYEVMLFPFEKYTWLLLSTILGLHWIVGSRWRMPSPILA  
GWMLWIFVIRASYEASVFNFIQNSPVKPSRPTLDQALSGGFRFITDHASYRMTLKIPSFQGK  
TLISAGQPVDVFDALLKAPWKTGAFTSRAFLADHLVRHRKHRNQLVILAEKIVDNMLCM  
YFPHGSYFAWEINKLLFNMR SFGIFQHHSQILAWDNLP TTTDTDTDPGKRIHSSTESVATGFA  
ESMSFVVAALNCLMGALCISIVVFGLELLSRRRHWTGLEWLFERV-

>DmelIR7e

MNHINEFVARAVLHVHHYILSVTPSLVLTCCRSNHTCNFYNKMMSTLFREWGLAPLQI  
VNVLRGVPWHPVPGRRHFNVIFTDSFAAFEEIRMEYYSREYNYNEHYFIFLQADRLLQG  
EMRLIFDYCWRYRLIHCSIQVQKSNGDILFYSYYPFGEHGCSDMEPQLINRYNGSMLVEPD  
LFPRKLRNFFGCPLRCALWDVPPFLTDEDEQEEVLRVNGGYEGRLLLALAEKMNFTIAVR  
KVHVNM RDEALEMLRRDEVDLTLGGIRQT VARGMVATSSHNYHQ TREVFGVLASSYELS  
SFDILFY PYRLQIWMGILGVVALSALIQLIVGRMLRERMGSRFWLNLELVFVGMPLLECPR  
SHTARLYCVMLMMYTLIIRTIYQGLLYHLIRTHQLNRWPQTIESLVQKNFTVVLTPIVQEV  
DEIPSVQHMRFRLLLEANSELDPLYFLEANHQLRQHVTASALDIFIHFNRLSADKVHQRGEQ  
GSGAHFEIVPEDIISMQLTMYLAKHSFLIDQLNEEIMWMRSVGLLSVWSRWELSESYL RNE  
QSFQVLGTMELYAIFLMVLVGLIVGLLVFILELVSMRSIYLRKLFT-

>DmelIR7f

MQGEDANLYVARALRLVIENVLAQLSTTLVVTISTRHLGTAHWFEYMMNILMDSWRMVA

VQLLRIRPDLVVPVGRKRVSLLMVDSYQGLLDTNITASNANFDDPDYFIFLQARDHLI  
PKELQLILDHCLAHFWLHCNVMIQTAQVEVLVYTYYPYTADACQKAYPIPVNTFDGRKW  
KASQMFPDKLSQMHGCPLTVLTHQPPFVELVWDPKHNRSRGSGFEIQLVEHLARRMNF  
SLELVNIALLRPNAYRLAEGSSEGPIEKLLQRNVNISMGYFRKTARRNQLLTPMSYYSAN  
LVAVLQLERYRIGSLALLVFPFELSVWMLLLLALLIHLGIHLPSARRGNEEDGGGGLQVVA  
LLLGAALARLPRSWRHRFIAAHWLWASIPLRISYQSLLFHLIRLQLYNTPSFSLDQLLAEGF  
QGICTANTQRLLLEMPQLARDPDSIQSVDTDFDWDVNLVLRNRNRKIFAVANQDVTLSFL  
HSSAHPNAFHVVKQPVNVEYAGMYMPKHSFLYEKMDDDIRRLDASGFIHAWRRASFASV  
HRKEQVHMTSRRYINHAKLSGIYVMAGLYLLAGLLFAGEVLLRQRN-

>DmelIR7g

MNVTSLLNFESMKYIGAQTQAASINHHVAQALRVFIEDFYQRIAPAFIVVLSCRRPSPMNF  
YRNIMQLLYESVDTMIVQLVLVELGRPRRIAGPRTHNLLLVDSLDALLDIEIHTYTAQSDTS  
EYFIFLQQRDALIPHDMQGVFAYCWRHQLINCNVMTQSSGGQVLLHTYFPYAPGQCND  
SQPTRINMFLGESWKHRDYFPSKLHNLNGCPLIVLARKVSPFLDLDEGQRELRLGLEGRLL  
QELSRRMNFSIQFSGLQDQLKNRTTWTEKQLLQKLVQERIAHLAIGYVRKRIQYATNLTPV  
FPHYSNRVVGCLLLNAHNLSLEIWSFPFQALTWICLVAGDRLALVLAVYAASLGLPIDPPE  
RPSLQLLFASWLIFGLIVRSMYSALLFFILRYHLHQRLPGNLQDLTHGDYAAVMGR TTLQD  
LREVP SLQDLLGLKSVIVT SEREEVLR TLD RCTLR EGAGSHPLFFGLISQDALLHLTQRGH  
RAGAYHIIPQDVLEQQLAIYLQKSHLASHLDHLVMSIRSVGLVHHWAGQMASERYFRSR  
FLYREKRIRQPD LWAVYILTAGLYLLSLVVFICELLASRRAGL-

>DmelIR10a

MAVLGTVFLLFMLDLKTLNLRNLNGLLVEPTRDLPQLELWLRAGSDHQDAENPYVQWFL  
LRTEIPLSIVTYQENRYWMDDPFGRRLNLVVM SLDQLLTNRGAAPIQKASTFFYILADQD  
KDSLADQLRLEGSCRQLWTQHVKVYNRFFLTRDGVWIYDPFKRRDSAFGR LVRYYGSET  
LDKLLFRDMAGYPLRIQMFRSVYTRPEFDKETGLLTRVTGVDFLVAQMLRERLNFTMLLQ  
QPEKKYFGERSANGSYNGAIGSIIKDGLICTGFFVKDYLVQQYMDFTVAVYDDELICIYV  
PKASRIPQSILPIFAVGYDIWLG FVLTAFACALIWLTLRVINLKL RIVSLGNQHIVGQALGIM  
VDTWVWVRLNLSHLPASYAERMFIGTLCLVSVIFGAIFESSLATVYIHPYKYDINTMQE  
LDESGLKVYKYSSMADDLFFSETSPXWNRDLRADVIDEVARFRNKAGVSRYTSLILESS  
HFTLLRKIWVVECPKYTTISYVMPRDSPWEDAVNALLRFLNAGLIVKWIQDEKSWVDI  
KMRSNILEADAESLVRVLTIGDLQLAFYV VIGGNLLAFLGFLAEHFRWKLQKKGV-

>DmelIR11a

MRFAILWLFSGCLLPGIQVGIWVVVRAQPTGRDVLLSRLGNQQNELNTRRLANASSYLTR  
NYIANRINTLVVREICVECPYELSERQRQLVDQILASLAPELSVLLHKGTAETTWEYTLFV  
VNDHTAFTGQVFIFPDELLEREF C I V V V S E I Q S R Q F V R Q T V G S I V K S N L Q M H F V N V V V V A  
QLEDGT VGTYSYKLFKANCTPGITVRQINHFD RITGKPKQQSMPDLYPVRNGHLGDCPFNV  
GAAHMPPHLIYKRHKDPPASNVSIPAEDLAGIDWDL LQLLAKALKFRIQLYMPQEPSQIF  
GEGNVSGCFRQLADGTVSIAIGGLSGSDKRRSLFSKSTVYHQSNFVMVVRDRYLRGLGP  
LILPFRGKLWGVIIVILLAVLSTCWLR SRLGLSHPIEDLLTVIVGNPIPDRHRLPGKGFRLRYLL  
ASWMLLTLVLRCA YQARLFDVLR LRSRHRPLPKDLSGLIKDNYTMVANGYHDFYPLELTCR  
QPLDFSARFERVQRAAPDERLT TIALISNLAYWNH KHPNISRLTFVRQPIYMYHLVIYFPRR  
FFLRPAIDRKIKQLLSAGVMAHIERRYMQYENKRKVASNDPVLLRRITKSIMNGAYRIHGL  
VIVLATGMFILELLAGRSNGRLRRWMEVHQ-

>DmelIR20a

MLASLNRSTGLSAELLDLYGLVVHFLLSGEHTTLVYFNPAGLDCSWGVLWQRNLTAHPQI  
VWQRNYSYPDLYYQFNAKLLVLACLPMDSRAAIQLEILANSLSHLRTVVRLLEI VAGPDQ  
VTLARQYLSFCLRRSMLHVELYFRDYHHSILYSFRAFPSFELVMRWISVGQGVKLFHLKL  
DDLGRHRLRVIPDLSPNNTFFYRDARGDNQVTGYLWDFLATFAGRLNAGLEVVRPSWRA  
GSASDSSYMLEYSAGKGLIDVGLTTTLITKWNLWAIHQYTYPLLSSWCTMLPVEKPLATPD  
LFGRIVCPTLAMTLLLIILVTWLVRQLRCLTRLKNSRPARIVPHLLTLLLTCSAQLLSLLI  
FPYHVRIASFEDLLRGDQKILGMRNEFYNFDFGAFRARYAGVFYLIDDPNELYDLRNHFNT  
TWAYTMPYIKWLVIKTQQRHFSKPLFRWSKDLCCFFDFMPTSIVVAPDSIYWESIKDFTFRIH  
QAGLMKHWIRKSFYDMIKAGKMSIKDYSDELETLKPLNIGDLEIVWRVCGAAI AVASAIFIM  
ELLYFYIN VFFNSL-

>DmelIR41a

MFIDLSWSLVLSAIVGKYLNESTICIFWNDKFEFQLLHKSDYISFVGINIKSFDDNGGHYIID  
TGLKKKELQNKHLFLDELVIKIIISIEVTHCETFVVFDDKIDRFDVNAFNKASVYSIWRSLHN  
KFVFAHIANESPE SRNHFFEDQPNILFVVRDHSSASSFDIKTNKFVGRKAENPSQMILVDRY  
LASEQRFQFGKSLFADKLNQLGREVIIAGFDYPPYTVIKHNMSTNAQDMGVSGESDFKN  
VYIDGTETRIVLNFCEQFNCTIQIDSSAANDWGKVPNMSGD GALGMLINRKADICIGAM  
YSWYEDYTYLDLSMYLVRSGITCLVPAPLRRTSWYLPLEPFKETLWAAILLCLCAEATGLV  
LAYKSEQALYVLPGYREGWWTCTSGFVCTTFKLFISQSGNSKAYS LTVRVLLFACFLNDLII  
TSIYGGGLASILTIPSMDEAADTVTRLRFRHLQWAANSEAWVSAIRASDEALVKDILYNFHI  
YSDELRLRAQDQHMRI GFTVERL PFGHFAIGNYLG PQAIDQLVIMKDDIYFQYTVAFVPR  
LWPLLDKLN TLIYSWHSSGFDKYWEYRVVADNLNLKIQQQVQETMTGT KDIGPVPLGMS  
NFAGFIIVWILGSAIATLTFLLELSLTYILKQSNLK-

>DmelIR47a

MRQIKLLVWLLVGVVSSTEQLQFLKNFLEAVHKERSISTILLIQRKVHKNDFLHGLYPIF  
WPIICLDETKRVELVNNFNKDFLALVYMESEADTLLLSALAADLNHIRDARIMIWLQMSPS  
ENFLDRIVFQASKQKFLNLVIENTLKTRRFYFPFPQPKVQVIDKPFEEKEIYPALWRNFMG  
KNAIAVPDLVPPRSFNSFDPKTGHRRESGSIYNVFKAFTQRYNITMLLKWPLIRNTTQEEIIG  
KSVRGEIDL PITGQLISFRHPNGSRSQPLLGMTALSIAVPCGPELPMFDRFFLFYGLATPITIT  
GYVLLNTIEIILGTLSDRIKRHPRRKKILNLVNLRVFSCILSLPTPQGNRLRSVKGQLTMV  
MSITGLILSCIVAAQTSTILTMKPQYRHKNFQELSDSNITVVCNHLNYLTIKQQMDPKFMA  
KFMQNIWIVNSIEQMKMIFDLNTSYAYQTF SYKKDPFTLLQMHTTRKAF CRTPLDLVSG  
LAYTAVLEKNSIYALALQDYTLKAFSAGLVYYWAEESIRDLISTVGR TQFEKLPVIGYQSL  
KLQDYNVCWKILLIGGALAF CVFIVEVVVGLINRRI-

>DmelIR47b

MREAQIIIFLLTSAAAVTLKQYEF LXSFLKAGEQEQTITLLMMQKHVHTKNLLQGLYPXP  
WPIIHVETQRIKFIALLYMSSEKDIFLSSLAANL KFERLDKPF GKSNIFPVLWRNYMGXIAL  
TLDHLVEPRSFYWTDPR TNIKRRTGYIYMLITNFAEQHNITLQLXSPPNEDMSQMVIIERTH  
KGPRSTHNWADDQLETFERXQDSL LPWHGSM AIVVPCGQEMSAYERFHAHAHAFRAPIIFF  
GFHIFLSLIDFLLRTISDRIRCNPRIQLLQTVLSLCVLR CILSTSLPNSNXLRSLRDNSPXX  
XVLQAXSYSALWXLGTAXQXHN RDFQSHKLHDYXTT DGSXHSIEVPGLLKARNXXIXL  
FHIFSSLGTKFDLRIGSAGSHTSGVEFRYYELLD RXSSLENNIVSQVFTILKLPYSRFRVLKL  
EDCRGCWQTLFVGFSIATFVFIVNVLMGFFRNINQKK-

>DmelIR48a

MHLLITETYMIIGKTLHDILNELNERLIISTNIIFCKQFDNLIHFEAQTSRFVYSSLEAFNITSL

WNHVGNDNKLFFVIVGNVPPYELFAKLELSSPENCTQFILNNTVDMCADALVKNSKAFSVS  
RELRIAPANVIVPHGKPLLSYRYLAAPFNTKVWIALGTYVFLISGFLCLIHWLRSGKWDFS  
QNLLEVYSSLLFTVFHLKATNGIERYILFGVLFISGFVYSTSYLRLLKSMLIAETFQKIQTF  
EELAESNIPLINPYDRMIFQHHHIPKSLWTAVRTVSSETLLNHRSHGYVRLCPAILTASKIPS  
HTHRHLFSVCRFSHEQEVVPGSSXXSLVPCIRKRNREXNHLGCLSGVSWPGISXFFHYG  
ALGGEAFGSILLHDANYFPSRLFRRLAELHYGSY-

>DmelIR48b

MILQSSNLLKLLLLLAISSVRTQGLNDIIIELNQRLNISNNFLYCNQSDKLNEYEIKYLQHM  
PPISLMIFTSIESMNFTQVEYNLADGNKLFIMGNEEPPYDFLHALNLHFQFAEYIIVIDEPV  
DLKKSTKWLDVFNHLWQQGYVQLLIYTSYDEKLYHKIIFPETVIEETLVEQYISIRGSFNNL  
YGYVVRVAAYNNAPRSMLYVNRWKGKHFAGFYMRFLRAFIDARNGSFVPVLTSPNSPGNC  
TLNLVNETVDVCADALANPAAFSLTHGFRIASANVLVTHAKPLHSYRYLTAPFQWSVWA  
CLVIYVLLVNVNLSFIGWLRSGKWEFSKYLLEVFSSLLFSGFYLKEIRGRERYILFGVLFIA  
FVYSTEYLGLLKSMLISEVFEKQIDTFEALVESNITLMVDPYDKILFAKYNMPEILSPIMELV  
SFETLLKHRNRFQDYAYILFSDRMALYDYAQQFLKHPKLLRIPIDFSFLYTGIPMRKRWFL  
KHHLGRAWYWAFESGLTRKALDADFEAVRVGYLSFLITEHVEAQLNVDFVMPAIALA  
IGYILALLSFVIEMTAWRIREFLGRKATMTSTGCSEGGHVDVD-

>DmelIR48c

MSLLRIILIIIFLRIVSSIPDTIISHLSAELQIKIQIYFGLGNDLYDFSRLDGNQKIIISHNISEEF  
KTYHDEPVLIIIRLERDLNLNLATLDVLRSYLTDQRQYNDILLIDNDEENLNSYVDIRKAYW  
NAGFSQVLIYNSQQRWTSIKPYPYLQIRPTSLKEYIENRNRNLMGYPLRVLTNDPPHCF  
VDKDELPGSPNRYKGSIVTMLKIFADQLNATFQANPFREFRRYSTADCVMVSDDEIDAC  
GSIFIRTYTYATSQPVRLNRVIMAPFGNPIEFYFFRPFDLVWIGTGIIIVYIAVMGSL  
HRWHFKEWNVGQYLLAVQTLLNRELSLPQSSSGSKFMLLLLLFAIGFILSNLYVALLSMM  
LTTKLYQRPIENLADLKAANVNILLQTHNIRPNSVYGSSEELRERFLLVEESQHLEKRNGLD  
PSYAYVDESDRMDFYLYQQKFLRRRRMKKLSNPVGYTWAVQVIKQNVVLEKHYNHVDV  
RFFETGLQNKLVDDVHELAVKAGFLHFFPTQTQTIEPLRLEDIVMAAMVLGGGHALAVIC  
FLVELFA-

>DmelIR51a

MYNVLVLFLLLFTRAQMEPHRRGHNMILLRSVLTVIRGRENWKNTPIFLGGHCNSDDL  
NLMSWLQNTMEVTCHTVDTSSTAKNENALGHFNINADNSLGLLFCQSSHELWIFNMDKR  
LRRLRGIRLIVILSDKRSSSSKAIMSTFKRLWHFQFQXNFQGYVVSTPVENDIPRVFFVKDK  
KTGRKQIRGFGYRTFVEYLHRYNASLHVSNSQQEHAJNSSVNMGRINQIVDGQLEISLHP  
YVDVPENMGDNSYPLLIASNCLIVPVRNEISRYMYLLLPLNQSSWILLGSIYISGVLYYI  
QPGLLHRTWDQRIGLNILDSISRIINICSPSRIYNPSLRYFIVSVHLSILGFVVTNLYSIMLGSF  
FTTLVVGEQVDSMQQLIQXQQKVLVYKYEVSTFLRHVEPDLVDGVAQLLVGVNASEQVS  
ALLGFNRSYAYPFTLERWEFFSLQQYAFKPIFRFSSACLGSPHGYPMKSDCHLQSSSLNMF  
MRIQAAGLLRHVVSDFNDAMRAGYVRLLENFLGFHSLDVSRLRLRWAVLLCGWLLST  
LIFLCER-

>DmelIR51b

MCKVLTLLVILLALTNAAYNVTLKSVLSLISTREPWINTPIFVGHNTQGGDLNDLIIWL  
HQTMGVTSMTMNLFLQPEHIRPLGHFKITRYNGIALFFCHDKHDIMWLTLDNRNLRKLRIR  
LIILRNQRSGSQGAIKSIFNALWQYQFLNVLVLQRDQLYSYTPYPAMRFFKLDIHTEPLFP  
AARNFHGYVVSTPAENDIPRVFHVHDPLTKSRKVLGYAYRTFVEYLDHYNASLRLTNPDE



NLDPTTSVNMNHIVQLIIDGQLEISLHPYVFTPTATKSYPLLIYPNCLIVPMRNEIPRHMYL  
LRPFQLYSWYILLFAV FYITGILYCISP KLNKSSWPQRLGLNFLDAISKILFISPPITTYRPTWR  
HLIIFLQLSVLGF MSTSWYNIELDSFFTTIVVGEQVNSMDQLVHQQQRVLVKEYEINTFLR  
HVEPRLVEKVSRLLPVNASEQVSALLSFNRSFAYPFTEERWQFFAMQQQYAFKPIFRFSSA  
CLGSPHIGYPMRVDSHLETSLNHFILKIQDTGLLNHVWVVSDFNDAMRAGYVRFVDNVLG  
YQSIDVDTLRLGWCVLGIGWILSALVFSCEYWHLYPWRFA-

>DmelIR52a

MALGWSVILGFIGQLSAQILNYTQSRDLELLEGLSFRVLSRLNLEEEYNTLLIYGKECVFH  
SLLRKLEISAVTVPSGSTDYDWSFSTAILILSCGYDAENEENS Y TLMKLRTRRLIYLEDNS  
EPESVCMRYSLKEQHNIAMVKSDFDQSDTFYSCRLFQTPNYVEGHFFKDQPIYIENFQNM  
RGATIRTVADSLVPR TILYRDEKSGETKMMGYLGHMINTYAQKLN AKLHFIDTSKLGAKK  
PSVLDIMNWNEDIVDIGTALASSLQFKNMDSVWYPYLLTGYCLMVPVPAKMPYNLVYS  
MIVDPLVLSIIFVMLCLFSVLIITYTQHLSWKNLTLANILLNDKSLRGLLGQSFPFPNPSKHL  
KLIIFVLCFASVMITTM YEAYLQSYFTQPPSEPYIRSFRDIGNSSLKMAISRLEVNVLTSLNN  
SHFREISEDHLLIFDDLSEYLVLRDSFN T SFIFVSVDRWNGYEEQQK LFAEPAFYLATNLCF  
NQFMLFSPPLRRYLPHRH L FEDHMMRQHEFGLVTFWKSQSFIEMVRLGLASMEDLSRKR  
NEEVSLLLDDISWILKLYLGAMFISSFCFILEILRCGERCKRLWRCRW-

>DmelIR52b

MTWLVILLCFLGYMAAHIADISVQNQSLMDNELINLLLKLRNEEFYDTLLVYGKDCEFHS  
VIKNVDVAVVLVSDSMNFENFSSLT LILSCGPDIDNGGPNSTSIKLRNRRLVLLKEDFQP  
SNICNIYTQKEQYNIALVRENFTKSKSIYTCRYFQDPNVDEVNLSG TKPIFIEQFQNMKGKA  
IRIVPDL LPPRVMLYQDANDGELKMIGYVANLITNFAQKVNATLQLDFLKPSTSITEISRMA  
KDELDMGITLEASLNTS NLETSSYPYLLTSYCLMVQVPAKFPYNLVYALIVDPLVLGIIFV  
LFLLLSVLLIYSQKMSWQDLSVANILLNDKSLRGLLGQSFPFPLNASKKLR LIFTILCFASIM  
LTTMYEAYLQSFFTNPPSEPEICSFQDVGSYNRRIAMSALEVNGLIKTNNSHFREIRMDDLE  
IFDNMPECYELRDAFNLSYNYVVTGDRWRSYAEQQTLFKEPVFYFARDL CFSRLIFLSVPL  
RRHLPYRHLFDEHMMQQHEFGFVNYWMSHSFFDMVRLGLTSLKDLSRPLAYTPSLLMD  
DISWIMKIYLA AIVLCVFCFLLEIGVDKWKRW MKFRNLQILNTC-

>DmelIR52c

MVWLIILFCLGNSSSQILDVTNNSHLDFDYRLFGLLQRLQVEKSYDTLLVYGEDCAIPSLF  
ERLQVPAVLVSSGSTNFDFWNFSSLT LILSCNFQDEREENYRTLMLKLT SRRLILLKGHIKPE  
SVCDFYSKKEQHNVMVKENFYQLEV VYSCRLFQDQNYEKL N LFDGKSIYKDQFRNMH  
GAPIRTLSDK EPPRTIPYIDSKTGEEKFKGYVGM LISQFVKKVNATMQIREDLIKDDEEVSF  
VDITNFTSNDILDIGICEARTLEMSNYDAISYPYLMSSYCFMAPLPDSL PFSVYMAIVAPSI  
LIMFLIIFCICSVLIYIQERSYRSLTIRSVLMNDICLRGFLAQPFPFPRQYNRK LKLI FMLVCF  
SSLISTTMYTAYLQAFLWGPPIEPRLTSFDDVKKSRYTMAINIYEREFLEALNVSLEDVEIYD  
YGKFSKLRSTFN TNYLFPVTALQWFTINEEQKLFKYKIFYYCDAFCLNQFDILSIPLRRHLP  
YRDIFEEHMLLQKEFGLTKYWIDQSYRDMIRANLTTFKDFSPLENDYIEVHNLYWVFTM  
YFVGMGMGLCFFILEILRPLRYWRNCKIKCEYCYAFLKNFAK-

>DmelIR52d

MVRIIIIILCLGYTKARILDATNTNHTDLEERLLSLLLRLQQEQFFNTLLIYGEDCAFSSLSR  
RLQVPTILVSSGSTSFEWNYSSLALILTCEFKAEREENYQTLKKLQMNRR LILLNGNIKPDS  
VCDFYSKKDQYNIAMVNNNFHQVGIIYACRLFQERNYEVYLSEGNPIYVDQFRNMQGA  
LLKSITFNLIPGSMAYRDPKTGQEKHIGYVANLLNNFVEKVNATLDMQV KLHKAGKKT SF

YNITKWASEDLVDIGMSYAAYFEMTNFDTISYPYLMTSTCFMVPLPDMMPNSEIYMGIVD  
PPVLVVLIAIFCIFSVMNLNYIKQRSWRSLVNVLLNDICLRGFLAQPFPPRQSNRKLKLS  
MLVCFFSVITTTMYTSYLQSFMWGPPIDPKMCSFADLENSRYKLAIRRYDIEMLRPFNVSM  
DHVVVFDESSQLEYLRDSFDDNYMYPMSALSWSAFKEQQKLFAPFLFYSEKLCLKPISF  
FSFPIRRHLPYRDLFEEHMLQQNEFGLSTYWIDRSFSDMVRLKLATMNDFSPPRLEDYIEV  
SDLSWVFGMYFTGLGISCCCFGLELLGLPSWTRRLRLTNWLRVRN-

>DmelIR54a

MWTVITGIVLWAPVLVAGSAVDFIFRAAAEHSLSVIMIRIDYCPYNWAKDIFENQTIPVVVL  
SDSETFINIRMF SRPLHVACLPGHELQKDLALLENFTSSLMDFPSQKKIVYISNNFSDPTRM  
DYIFETCYHRRINIVGLLASDEHRYFYRYHLYPSFRTEYRSLESSTIFDKDFPNMHGHLT  
VMPDQWLPRSVLYVDRRTGKQILAGSVGRFFHVLSWKLNATLQLSKKVTTGRFLNATAL  
KELSESFSVDVPASLTIMERVEQLASTSYPMEVTHVCLMVPVARRIPIKDIYFILSSASNMFL  
AIVIVSSYGLALNLLRNMTHRDVRLVDFVLDKALRGILQSFNLPLSRFSFSTRILIFLMLGI  
VGLNVSSIFGAGLDTLMAHPPRQFQARSFAGLRRTKIPLVTTEEDFPTWMKLRVPMMLVN  
VSEYNHLRNGRNTSNAYFASRLYWNLFSEQQKRFTRELFYSTDCLWSLALLSFQWPQN  
SLFTEPVSQILEVNAVGLYDFWVGMHYDMTAAGLSGLEDPSLQLKEREHPTSLRIVDF  
QWMWQAYGTFMVIAILVFLLEVSWHRITSLFVSLVY-

>DmelIR56a

MGSRFFIRNLILFGLLASSNMQIPFGELEKKFELDVDFLLGVTELVGHIQGLYSITVYADCID  
IHPSIQQRIMDKFMVPVNTIGSNLSRPNYHKLDNSRIRIVLFTGLNDTILVNLNKTDPYSD  
NFYMLAYASAIKNKCIELDFIEEVFTLLWKMSIQNAILLIRGEFMMEMWSYLYMGKIHKIK  
LTKPNSYLESLRKYNRFSLEVINDPPAIFWYNSSSEQADVTGGGNLSVSGPLGLIINFLRHL  
NVTIDIVPIPGKQTSQYELFQQPDNLRAENGVNMVGSALLKYSPMVTQSRMCLLVSNNR  
MIPFSRFLDRLVSPGVHKLTFVSSIGIFVIKYFSHRPRSFDVAIFCTIRFFFAIPLPSIILNRLPV  
VDRFIEVFIIIFVQILLSSNISITTSALTGFWEPPINVETMRASGLHILTEDPTILQAFKENILP  
SSLADLVILVDEDTYFHHVTTLNNSYVYVVQAHNWQIFRLYQQQMTNEPFEIASEELCSK  
WRILGIPLNPKSPLRFMFKDYFYRILESGLREQVWHSGFKKFCEFNKLPVDSVDSWQ  
PLSIEFYSNVIRAYIIGLVIATLAFVAELLHNGYRRKNVKKT-

>DmelIR56b

MLLDTDLASGVIRSPYSFDIPHAFIFNETQFVVPKFCGPYMEIVKHFAEVYHYQLFLDSLES  
LPKKSVEEQDIISGKYNLSLHGVIIRPEETSDFFNATQHSYPLELMTNCVMVPLAPELPKW  
MYMVWPLGKYIWTCLFLGTFYVALLLRYVHWREPGNATRSYTRNVLHAMALLMFSAN  
MNMSVKLKHASIRVIIFYTLLYIFGFILTNYHLSHMTAFDMKPVFLRPIDTWSDLIHSRLRIV  
IHDSLLEELRWLPVEYQALLASPSRSYAYVVTQDAWLFFNRQQKVLIQPYFHLSKVCFGG  
LFNALPMASNASFADSLNKFILNVWQAGLWNYWEELAFRYAEQAGYAKVFLDTPVEPL  
NLEFFTAWIVLSAGIPISSLAFCLELFIHRRKQRRPQYERFECYDY-

>DmelIR56c

MRSSFRICLFLTTYHPSHGWNMQHLLNLLAPFGRMNVFQEIVWFVSPHQRLDQLDEFIM  
RIDEAFGKSATQTVVNNNTEMRMIYSSARRNHMSFVFTTGAEDPIMKVFSKVLGRHFYV  
SMVIYVDKVGDMHPIYDLLTFAYNQFFNSMVHFESMEGVNQLFGVSKFPVMSFENRTD  
FLKYMGIWKQVQNARSDVGGFGFTTPLRQDLPHLFQSQGHYDGYRIIETVRFINGSF  
KELIMPPDSLGGQVINMKDALQLIRERKMEFCAHAYALFMSDEELEKSYPLLVVQWCLM  
VPLYNSVSTYFYPLQPFWDNVWFFALGALLLVLELMWLRMFSGGWSGYRGAVLNSFC  
YIINVPIEQQLQQPCLLRFLLLATVFFHGFLLSAYYTSNLGSILTVNLFHAQINTMNDIVSAQ

LPVMIIDYEMEFLLNLNKELPQEFLELLRPVDSAVFSEHQTSFNSSFAYFVTEHDHWEFLDEQ  
QKHLKQRLFKLSSICFGSYHLAFPLQMDSSLWRDIEYFTFRIHSSGLLNFYARSSFGSALHA  
GLVQRMPDTQEYTSAGLQHLAIAFILLVMSFLAGIVFVLETLSR-

>DmelIR56d

MDNRAAELILRERNIFPTNGSDNITLLNNMFVLEMFYRITQLYHFKNFIFYISERLDLNNKD  
SQEFFHNFWTYFPMAPNLIITREHHLGIPMMQFISTPSLVMVFTTGKDDPIMELASHNQQGI  
HWLKTIFVLFPSLQSRDFETNPESLAQFTAIEIKDVYDWWVRKQFINTFLITIKDNVFIIDPY  
PTPSIVNKTGVWQAEFFHKYAKNMKGYLVRTPILYDMPRVFKSDRPTNRYEKNFIHGTS  
GNLFLGFLEFVNATLMDTSANVTADYLNMTNLLDLVSQGVYETLIHSFTEITTKFVVSYSY  
PIGINDCCIMVPYRNQSPADQYMHEALQENVVWLISLFTLYITVAIYLCSPLRPRDLAAFL  
QSICTLTYSVPTFIIRTPTLRMRYLYILLAIWGIIVTSNLYISRMTSYFTTAPPVRQINTVQDVV  
EANLRIKMLAIEYERMAKSPLQYPESYLNQVDLVDKHMLDLHRDPFNSTSGYTVSSDRW  
RFLNLQQLHLRKPFIIRLTEICEGPFYHVFLPHKDSHMRSVMTEYIMIAQQAGLMNHWERE  
TFWEAVHLHRIHVHLFDDEPMALSDFSSLLRTWTLGLLAGLAFAAEMKWHEHVTFKR  
RPVIRITRKPRSFLRRFMKL-

>DmelIR56e

ERXAFRNQWAFCFPRTXAIEVVLSAWSPXCPGQRSKPQISXPHHXGSCWRKRKWKXKP  
RLLVVDKRTLVEHLNSLNDGYAYCIIAGHWQVGM-

>DmelIR60a

MWCNNPGLIIIFLGQILNLCQGIVNLSNETANTVIFMLPEKDLGPDVWKAGVGCCLDSFAQI  
FFFRNPKERFTRAYNMLVHAFHLSPADQIQEGFSKLINEAVTNPAPPDREELFQMRVSD  
YNITNGTEDKGELILADNYVIVVDSVDRLKELMKKKIVEMRSWNPARGFLVLFHNATCR  
NRPLGVASNIFKDLMEMFYVHRVALLYANSTMNYNLLVNDYYSNVNCRILNVQSVGQCH  
DGKLYPNNNAVVKASMQDYVSGFSRPNCTFFACSSISAPFVEADCILGLEMRILGFMKNRLK  
FDVNQTCLESRGEMDGPANWTGLLGKVQNNNECDFVFGGYYPDNEVADHFWGSDTYLQ  
DAHTWYIKMADRRPAWQALVGIFEAYTWIGFILILISWLFWFTLVMLPEPKYYQQLSLTA  
INALAVTISIAVQERPICETTRLFFMALTLYGLNVVATYTSKMIATFQDPGYLHQLDELTEVV  
AAGIPFGGHEESRDWFENDDDMWIFNGYNISPEFIPQSKNLEAVKWGQRCILSNRMYTMQ  
SPLADVIAFPNNVFSSPVQMIMKAGFPFLFEMNSIIRLMRDVGIFQKIDADFRYNNTYLN  
RINKMRPQFPETAIVLTTEHLKGPFFILVVGSCWAALTFIGELIHRWRTQLVSTSEQQDRS  
DKRRRRRRRRKPEKDNRWQRQVQVAPVVRFTPVKRRKVFQGQTSQK-

>DmelIR60b

MRRSLYLIIAIGLVDVHCVSLRYILNALENELQYRAILLVESASEIESCWEQKYIQGAVPILN  
FNANQSLYLKDALNTNILALVCLNENVESTMQALYENLEDMRDTPILFVLSDSKVQDVF  
LECLRRKMLNVLAFAKGLDRGFVYSFRAFPTFRVIERNVMDILQYFEQLEDLGGHTLTTLPE  
DNIIPRTVVYKSPDGSRQLAGYLYPFLRNYVSTINATLKVCWHLVPEDGMIQLGEVVRLSE  
IHDVDFPLGMHGHGEGSTSQNVPLEVSSWFLMLPMEPSLSRAQFFIMLGFQKVPVLLLLTI  
LLSTAHRIEMGLRPSWRCYVLGDRVLQGTGQAFFLPRRLSVKLMMLVYSLILLNGFTFSNY  
SITSLETWLHPPSGHPIHSWEQMRTLNLKVLIVPSELDSMTKALGKQFTESNSDLFELS  
GNFQDKRLAMDQSYAYPVTCTLWPLLEHAQIRLPKPEFRSREMVLIPLIMAMPLPKNS  
MFHKS LNRYRALTHQSGLYEFWFKRSF NELVALRKIHYKVNGDHQIYRDFEWQDFS YVW  
LGFVGGTIASILVLLAEIGYHRWQLNQN-

>DmelIR60c

MEMRLALFFTFACLAGAHDGSLRNMLKSLEDELGYRTILLLEGFVYSFKAFPTLRVVKRR

VKDVERRYFEPQLEDLGGCVLKVVPDGIMPRTMVYQGEDGELQMGGYLSHFIRNYVSTIN  
ASLQIRWDLFPEDGDFDMDSLTSNHNVDVPLGLGSLSFQTLHKDVAMEISSWFLMLPMEP  
SLPRARFFIRFGISLYLIPLIILLAIVLSNAHRFEAGLTPSWRCCSMGNTVLRGVLAQAFVLP  
KGLSPKLMFVYWLLLVSGFFVSNYVIVYLTAWLIQPPTSDPVTDFDQMRAKILKILMVPT  
DMDYLKSIRGAEYVDAHSDVFQTADSTDFQTQRMSMELHFAFSVTGTLWPLLRAQVVKL  
HRPIFRRSKEMVFLPFVIMGMTMPNNSIFLSSLKQYRLRTSEAGLYLLWFKKSFSELVAIHK  
ISYKEDWVHDSYSDLKWEDFLFAWLGLGTTVSLCLALLAEIGYHRWLWKRTHQ-

>DmelIR60d

MRLAIYVAFLSSIGNRSGFLSLLMSLGKELHYKTILLVGGSSTCWSLEPFETGVPILNLRG  
ENNAYPQDTFNSQMLALACLQTESEDAVKLLYRSLKDMRDTPTLLFASSEHIIHDTLFLGC  
FRENMLNVLALTASSEFIYSYQAFPTFRVIKRLVEIHRYFEPQLKDLGGHIVSALPGNIM  
PRTMCYRNAEGERQLAGYLNTFIRNYVESINGTLRISWGLVPEDDMRHILTISRLSKIQHVD  
FPLGIPLYNKTDKQHVYMEISSWFLMLPMETSVPRAHLFVKLGLERLLPIVVVGAVLGN  
AHRIEVGLGSPWCYLLADKVLRGALAQPIVLPRLSPKLMLIYSLLLSGFFLSNYMA  
SLTTWLHPPASDRILEWDQLRYLHLKVLTIPEEFKYMSLILGTFMTAYGSIFQLTNSTDF  
QRRRISMDPSYAYPVTTSLWPFLELSQVRLRRPLFRRSYDMVLQPFQVMSLPLPRNSIFHK  
SLLRYAALTRETGLYYYWFRRSYELVALGKISYKEEGNPYCDLKWNDFRIVWLAFGLG  
TIISCLALLLEVAHYRWHLGNSSL-

>DmelIR60e

MVIKMFLLVSVLLCLVGASDESSEQVQLQDLNLALQTELNVFIDFECCATSEILHKLD  
SPRILLSSNSREARDLRIRGNFTESTLIIVSVMDSDLNPLVASLLPRLDELHELHIVFLSNEE  
PGFPPKQDLYTYCFKEGFVNVLMSGKGLYSYLPYPSIQPISLSNVSEYFDRARIIRNFQGFV  
RILRSTLAPRDFEYSNEQGLVRAGYLFTAVKELTYRYNATIESVPIPDPEYDVYLAVAEM  
LHTKKIDIVCYFKDFSLEVAYTAPLSIIREYFMAPHARPISSYLYYSKPFGWTLWAVVISTVL  
YGTVMLHLAARGARVEIGKCLLYSLSHILYNCHQKIRVAGWRDVAIHGILTIGGFILTNVYL  
ATLSSILTSGLYDEEYNTLEDLARAPYPSLHDEYRSQMKAKTFLPERLRRNSLSLNATLL  
KAYRDGLNQSYIYIYEDRLELILMQQYLLKTPRFNMIRQAVGFTLESYCVSNSLPYLAMT  
SEFMRLQEHGISIKMKADTFRELIHQGIYTLMRDDEPPAKAFDLDYFFAFVLXTVGLISS  
LLVFFAELVSGHL-

>DmelIR60f

MRFHNLNIANSGLLGLHLCPTRSALPEQNPCFSKAGAVIXNLTLPWRRWRERCLLGALRPX  
TLPTPELQCXSKYLPXRKSQQENASSGLPGFCXGDXQTELHRGSRAIALPRSPYHDLYYV  
WIAYLGGTMIGIGMLAVEIACFKWDLRRPPIXMY-

>DmelIR62a

MYLQFLFALFLSRYQIVATENFDRAFELALFLDRIGRVHRLHAITIVNSLGSVDPSYLLDLH  
RGLMCNSSNHFYMLPQMTATDKDSSHVHFSSLQDEETIYLVFARDSKDAVIYLAERARG  
RRYTRTMFLLRKQESQKDIKYFFELLWKLQFRSALVVVAARNFYQMDPYPTVRVIRMRRL  
SSYDPHVHVPANRKNFRGYRMRLPVQQDVPNTFWYKNRRTKAWELAGLGGILINQLM  
MHLNVTMDLFRFEVNGSSLLNMAALTDLIVKGKVELSPHLYDTLQSNSTVDYSYPTQVAP  
RCFMIPLDNEISRSYVFLPFSLTMWLCLLVLVVFVYVRRRLIPDGHFVAILGVPAGAGQ  
VRYGNRKPVRRFSTFLILFGIFILGQTYSTKLTSSLVTLIRRPDNLSEELFLLPYRILVLPD  
VYAIVDSLGHAEQFSTKFSCTDAENFSQKRISMHEIYIPISTIRWRFFDMQQRFLRKKRFY  
FSKICHGSPYQYQLRVDSHLKDALHRFLLHVQQAGLHDLWLDTCYRKAHRMGYLLKDFS  
TLAELEEKRLRPLALNLLVPAFSLFLCGMLGSGIAFLVEIRHSFGCRQKPPSINRNPGD-

>DmelIR67a

MLPILVPVLLLFNETSWINPILTSIYKDRHHETVLLLQHSQHGNASGLERFPWPVFSFNEQM  
DFYVRGKYNSEMLVLIWQTGNSDWDLDLWQALDRSLLNMRKVRVLLLRKWEKIPTADV  
AATAEHLFLHVAVIGQGNRIYRLQPYAPQSWLQVDPIESPIFIKIRNYFGRYIVTLDPQFPP  
RSIVYRNPKTDEIQMTGYVYKFLLEFIRIYNFTFRWQRPIVQGERMNLILLRNMTLNGTINL  
AISLCGFETPSXLGVFSDVYDMEEWYIMVPRAQEISIADVYVVMVSGNFLIVLIIFYFIFTIL  
DTCFGPLLLKERVDWSNLMLNERMISGIMGQSFNMSARNTISSKVTNATLFLGLVLSTLY  
AAHLKTLTKRPTSQQISNFKQLRDSPTVVFEEAERFYLKHAWDRPIRYIKDQLNFRETIE  
YNALRMGLNRSNAFSAITSEWMIVAKRQELFKQPIFTVQPELRVIQTSVLLSLVMQSNISIY  
EDHINDLIHRVQSAGIVEYWKHQTLREMITMGMISQKDPFPYVAFREFKVGDLFWIWLLW  
VSFLFMSFVIFLCELLVDCFISKTLIRNKRPH-

>DmelIR67b

MELLYLNTLQSLSLLEGNRLVQTVQELNNIYQTELVNFLEFGNGADILESAQGTFTVPTLWI  
KNPQNQKVMKGNFTSCTLTILYLEDEHLDRGLYYLANWLWEYHHLEVLIFNGGSYDKLI  
QIFSRCFNEGfVNVLMPLGSDELYTFMPYQDLKILNLKSIKEFYSLSRKKMDLNGYNITS  
GLVIAGAPRWFSFRDRQNRLILTGYMLRMIVDFTNHFNGSVRLMNVLTVNDGLELLANRT  
IDFFPFLIRPLKSFSMSNILENCGLIVPTSRPLPNWVYLLRPYAFDTWIAWLIMLIYCSLA  
LRILSKGQISISA AFLKVLRLVMYLSGSRDMGTRPTTRRLFLVILTSGFILTNLYVAQLSS  
NSAAGLYEKQINTWEDLDKSDSIWPLIDVDIKTMEKLIPDRTKLLKKIVPTLEADVDTYRR  
NLNTSCIHSGFFDRIDFALYQQKFLRFPIFRKFPHELLYQQPLQISAAFGRPYLQLFNWVFRKI  
FESGIYLMKDDAYRHGIQSGLLNLAFRDRHLEVKSNDVEYYYLIAGLWFGGLTLATVCF  
LLELLIGYAKIKVTISCKMNIM-

>DmelIR67c

MFCWLIFLNIILLSDRSESWSAREVIHQFNHDQQLQLNILDCNDVELQIGQEVSNLVNS  
TADKMILGRFSSHSLIACFKDSTRNRTLNGVKELLWGLQYLPILFVVDNSMDFYFQQAL  
RHGFIHVLALNFMNGSLYTYKPYKVEVHQIKDMQKFYKLTCLRNLQGGAVRTTIVETMT  
PRCFRYRNRHGQLVYAGYMYRMVKEFISTYNGTEEHVFGNVDTVPYKEGLAALKNGEID  
MMPRIIHALEWYFYRSHILYNIKTYIMVPWAEPLPKSLYFIQPFRTVWITIMVSFVYASI  
VIWWIRYRQQGNSSLTQSFMDVLQLLQPLSKIWHFNMGTQVVSFIVLFFVGFMLTNL  
YTAQLSSYLTTGLFKSQINTFDDLFREKRTLLVESFDAEVLHNMTKEKIIQKEFESIILITSIE  
EVFKHRKSLNTSYAYEAYEDRIAFELSQQRYLRVPIFKILKEVYDQRPVVALRHGLPYVEL  
FNNYLRRIFESGIWIKLQEDSFLEGIASGEISFRKSKSREIKIFDKDFYFFAYILLGMGWCVS  
TIALFLELWSFKYSVTNVLHEG-

>DmelIR68a

MRCLWILIVAFISLAMATSIPPIANPAPLSGYEMQLKILLQKILWVANVKRCFAVITDDLHY  
PIYDRIFVESVGRRVIPFFVMRTNESDDLQRPSRQVELFVKAIKSSDCELNVITLNGWVQV  
RFLGYIYDNRSLNMQKKFVLLHDLRLFESDMIHLWSVFIDAIFLKRQLDNKYTISTIAFPGI  
LSGVLMKNIANWELGKGLNGRILFADKTSNLFGTSLPVAISEHVPMVLWANATKSFQGV  
EVEIMNALGKALNFKPVYYKPNQ TENMDWTELDGGASVAYGSGNPDGYAQNTHIDSM  
LVDEVAHSAARFAIGDLHLFQVYLKLVELSAPHNFECLTFLTPESSDNSWQTFILPFSAGM  
WVGVLSSLFVVGTVFYAISFLNAIINGNVSSSEFFRCLRPNRNVPMDPKIYRRISFRIASRYR  
SSKGDRMPRDLFDGYTNCILLTYSMLLYVALPRMPRNWPLRVLTGWYWIYCILLVATYRA  
SFTAILANPAARVTIDTLEDLLRSHIPSTGATENRQFFLEANDEVARKVGEKMEVFGYSDD  
LTSRIAKGQCAYYDNEFYLRYLVADESGSALHIMKECVLYMPVVLAMEKNSALKPRVD

ASIQHLAEGGLIAKWLKDAIEHLPAEALAQQEALMNIQKFWSSFVALLIGYVISMLTLLAE  
RWHFKHIVMKHPMYDVYNPSLYNFKRIYPQH-

>DmelIR68b

MKFLVGLLLQWYLPGIYALAEIACRIAVEQNVQVTYLYRCASCPASFDADYSALELDLYRC  
VGSRLPVITRNMEAHELEPFRRDLSIFQIPAAEKGDSLVRRLDMLNPHQRRKHMHKYL  
FVWPNAGRHQLLRLFRGSWAKKLLYGLAITGRENGTFDFDPFAWGGLQVIQRLDGEVY  
ARKVKDLRGYPLRFSMFTDPLMAMPRSPVETAGYQAVDGVAAARVVGEMLNASVTYVFP  
EDNESYGRCLPNGNYTGVVSDIVGGHGFAPNSRFVLDICIWPAVEVLYPYTRRNHLVVP  
ASAIQPEYLIFVRVFRRTVWYLLVTLVVLVFWVMQRLQRRIPRRGVIQFQATWYEILE  
MFGKTHVGEPAGRSSFSMRTFLMGWILFSYVLSTIYFAKLESGFVRPSYEEQVDRVDDL  
VHLDVHIYAVTTMYDAVRSALTEHQYGLLENRSRQLPLGIATSYYPVRRRDRRAAFIM  
RDFHARDFLAITYDSQAERPAYHIAREYLRSMICTYILPRGSPFLHRLESLSYSGFLEHGFFE  
WRQMDLITRVGASPDAAEFLEDLGDQTDTSGSNELAIRNKKVVLTLDILQGAFYLSVVG  
IGISCLGFAVEHAHWFWRRQTLRSAVEARTS-

>DmelIR85a

MSIQWLKILLAILVNLAGTRENHIPLDLKSSIVMVKMSQILCKARIKVLVYFENQTS  
HEHTGQILKEVTKCDISNQNTPLEAVKDDGILMYMVMITTNISQPLELSLIRKKSAAKHRS  
HVFLLRDADTVSDAWMRASFRQFWKIWLLNIVILYWRDGRLNAYRYNPFMDNYLIPVD  
NKPNEVPTLEQLFPKTIPNMQRKPLRMCYKDDVRAIFWRQGTILGTDGLLAAYVAERLN  
ATMMITRPHSYNNHNLSSDICFLEVAKEYVDVAMNIRFLVPDTRKQAESTVSHTRDDLC  
VIVPKAKTAPTFWNIFRSFGSLVWALILVSVLVANVFCYILKSEVGRVPMQLFAGALTPM  
TQIPPNSIRLFLIFWLYFGLLCSAFKGNLTSMMVFQPYLPDINQLGALARSHYHIIIRPRH  
VKHIQHFLTGLGHKESRIREQMLEVSDTQMYEMMRNNDIRFAYLEKYHIARFQVNSRVH  
MHLGRPLFHLMNSCLVPFHAVYIVPYGSPYLGFLDSLIRSSHEFGFERYWDRIMNSAFIKS  
GVKVVNRRRGSGNDEPVVLKLQHFHAVFALWLVGIGMACIVLAWEHLTHNYNLAVTKRR  
D-

>DmelIR87a

MSTPEQRFWLAALLFLLSQHSEVRGFGINLMKVQTEDKGQEACILALLRKYFDSGDGLSG  
SVLCINRNYQLPNIEEQLLRGVNNYENYPWSLLITNSREGPSPAKFLMNEKPQCYFLIVDN  
LEDEDLDEVFEHWKGMVNWNPQAQFVVYLASLEETDEEMNDLMVELLLTFINKKIFNVN  
VIGQSEENQFYGKTVFPYHPDNNCGNRVISVELLDACDYPSEETDSEDEDEDEGDGAQ  
EEDDGPQEEGDGEQEEEDGPQEEDGDQAKGDEGQENDDGGLENKVENEFRIGASDDD  
ELENLSSNSSEPEAIIIEFFRAKFEDKFPRDLSGCPLTASFRPWEPYIFRNSEEQPVDDYYY  
GLQGDEDDYNDTSPNYGESDDESADPGEDGGAIPDTETQSGGKLLSGIEYEMVQTIA  
ERLHVSIEMQGENSNLYHLFQQLIDGEIEMIVGGIDEDPSISQFVSSSIPYHQDELTCVVAR  
AKRRHGFFNFVATFNADAGFLIGIFVVTCSLVVWLAQRVSGFQLRNLNGYFPTCLRVLGIL  
LNQAIPAQDFPITLRQLFALSFLMGFFSNTYQSFLISTLTTPRSSYQIHTLQEIYSNKMTVM  
GTSEHVRHLNKDGEIFKYIREKFQMCYNLVDCLNDAAQNEHIAVAVSRQHSFYNPRIQRD  
RLYCFDRRESLYVYLVTMLLPKKYHLLHQINPVIQHIIESGHMOKWARDLDMRRMIHEEIT  
RVREDPFKALTFDQFRGAIASFSGLLLVASCVFALCYVVKYVYRTEKRERKTKKITKKVH  
NIKIQHD-

>DmelIR94a

MALPKQLKFINIFLVLLIYGSSDGTENQHEIFLNRLQAVHNERSVETLFLHHSNLANCS  
LQDWNPPRIPTIRSNELTVFNVEKTFNHNALALVCLMKNSYREILNTLAKSFDCMRQERIL

MIHRKSDSKFIEDITHEVKNLQFLHLVIVLIVQEKYNGQVFASTLRLQSFPEPHFKRIRNVFAI  
QRIFYRPINFHGKVLNAIPNDIPILFVALNEMFTEYARRYNSTLRIQNRTIKEDIEITEDNYDI  
DMKIQLHNSQNFLHMHMNIAMDIGSNSLIILVPCATELRGLDIFKELGVRTLTWLALLFYIIFV  
LVEMLFVFISNRFNGRNFTMRYTNPLINLRAVRAILGQTSPISNRYLSIQHFFVFMSLFGTL  
FGGFFDCKLRSFLTTRPYYSQIENFSELRKSGVTVVVDHTTRQFIEQEINANFFRDEVPNVR  
TTTIQELINHVYSYDRKFAFVANSIPWRTFREEMKSINQKILCDSKNLTILENVPLTFSIRR  
AIFSHHLRNFIINAADSGMITCWFKMAGKVKIRKHIKTTLRESEQQPSHLPLSFDHFKWLWA  
VLCIAYVMSFMVFMVMEILWSKYQRRTRSVSIV-

>DmelIR94b

MSLIFNLLFILLSQAVSQETEFLLQKYLNNIVRSMIKLHKMETLVIVKHHLNDCSLQNW  
NAHGMIIRTNDQGKLMKDTFNSRTLAIIICIGQNSHITLLRNVFETFGKVQQKILWTQM  
ELKEKFFQEISKSRDLKLLNLLVLKAVTKDKLLIYRLNPFPSPHFKRIENIWTPNDTLFMD  
TKFNHFGMTAVVKHDYNWTIQMGNIRKFPISRIEDKEVIEFALKYNLTLQFFNDVERFDIEL  
RKRILKSNSTQPIDSGIPMVFSLLIVVPCGNYSIQDVIKVSIEKWIFWIILVYVIFVLEIT  
FLGVITILISRSRHQMIPNTLVNLCFAFRAILGLFPETRRTSLSLRQLFLAIALFGMIFSIFINC  
KLSSMLTNPQPRPQVNNFEELKTSGLTVVMDHDAENFIEKEIGVDFFNQYMPRKVTLTFTE  
RAKLLFSLKGNHAFTLFSFAIIESYQRSKGLRAHCTSEDLIVAERVPRYILENNSILDRPL  
RRFIRQMQUESGITNHWLKNIPSSLEKNLMQITIPYDRERVHPLSIEHLTWLWCILILGYSISM  
IVFFVEMSLKRRKKNLENRAPNIC-

>DmelIR94c

MSKVFKLLVPLIYLSLTKGSKNPQLKFLRELINVIEEGREIRTIMVIKHSRDEYCHLDQWN  
PRGSPILRTNEMGSIRISGYFNDQAVILACMGENDYGLLKSLANAMDNRQERILWSER  
EPTKMLMDYISQQADRYNFAQIIIIVTMNEDVDAVPSLHQLNYPYTPRFRQITNISNIRRTSFF  
GCGLSFQGKTAILKESVVSNIKRVWSPSGPIPLSELKDYEIVQFAVKYNLSLKLVDQNESK  
SDHFDIQLGPLFITKDFPTQMAFVSPNTACSLIVIVPCSPKWRFMDVLHKLGVKLIGCLLI  
AYAVFVLIETLILWLTHRISGREVRLTSLNQLLNPRAFRGLGLPFPEFRSSISLRQLFLVISV  
FGLVYSNFSCTLSALLTKPAQNPQVRNFKELRDSGLITIMDKYTHSFIEKHIDPEFFDHVL  
PHYLILQKKEALRMIWNFNDSYSYVMYTTTWSLNTVQKSFDERVFCESLTIAWNLP  
MYVLGNNSVLKWMLSRYITYMPQTGIPDSWTEQLPKVLKLLYNVTSPRIKEGAVPLSIQ  
HLSWIWHLLFIGESIATLVFIVEILLQKSNQHTSNMRERSSEDDDFV-

>DmelIR94d

MGQLHLLLVALVLLSPGGDSFYHSLIHHLNRELKIEYVLLLGNFDTTWLDILWQLPVSVLQ  
IKEHSRETYSLLENPSHNVLTIAFVNDSPEDILEILYRNLRLMLNTQPVLLVIRKSTIRVNSLLE  
WCWHHQLLKVVVAIAQDFMESLIVYSYNPFPVLQFIERRLDNSTVIFEKRENLHGVEVPIA  
LGGSSPRLIVYRDLEGKLIIFSGPVGFMKSFEQRYNCRLVQPYPFDESAISPARDLIASVQN  
GSVQIALGAIYPQVPYTGYSYPIELMSWCLMMPVPEEVPHSPLYSMVFSPMAFGITIVAM  
VLISLTLSMALRLHGYSVFSSEYFLHDSCLRGVLSQSFEVLRAPALIKAMYLVICLLGLLI  
TSWYNSYFSTFVTSAPRFPQLTSYESIRHSNIKIVIWKPEYEMLLFFSENMEKYSSIFQLQED  
YKEFLHLRDSFDTRYGYMMPMEKWSLMKEQQRVFSPLFSLQDDLCVFHTVPIVFPVK  
NSIFKEPFDRLILDVTATGLLSRWRDMSFTEMIKAGQLGLEDRGHPKEFRAMKVGDLIQW  
RFVGMWMLGLATIVFLLELICFWRHKMWQNMKYMFCRNKNI-

>DmelIR94e

MDCPKWILSGLCLISLVSGATVIELLGTLELDFEYVLLMKNRNFSLSDQVWNGTSLTKD  
VMDEVQVPVLQFNENVSYFLHNSISRRLVTLGFMSDANLDEHRGLLTALVANLRHM TTSR

VIFLVQSKASTDFLYELFRNCWRKKLLNVIVIFQDFETTSTFYSSNFPILQIEERIYETSLQT  
LPIFPDRLRNHLHGYEMPVILGGTAPRMIAYRNKKGNVVYDGTVGHFMTAFQQKYNVKFV  
QPLQAKNPLDFAPSMQTVGAVRNETVEISISLTFTIPPFGFSYPYEQMNWCVMLPVEADV  
PPFEYYTRVFELAAFLTLGLTLVLISCLLASALS LHGYATNISEFLLHDSCLRGV LGQSFVEV  
FRAPTLVRGIYLEICVLGILITAWYNSYFSSYVTSAPKQPPFRTYDDILASKLKVVAWKPEY  
AELVGRLLLEFRKYETMFLVEPDFNRYLALRDTLDTRYGYMITTNRWVLINEQQKVFSRPL  
FQKRDDFCFFNNIPFGFPLHENSVMFEPVQKLIMELAETGLYHWHWITTFSEIDAGEMHF  
VDLSPHREFRAMQIQDLQYVWYGYAFMVVLSLVWLENLAYTVKSKTIFPTHFMQRNK  
K-

>DmelIR94f

MSGMWQQVLLAETSNWFRSDVLQRFWTHLRVEIRFRTMLNYRLESCDCWFDNVLGSND  
STALLWNDQTYPHYLRRRQD TDILVVSCLRFHQYQEVLLALSMLDQMRSMPPVVLQCG  
DEDSMQELNSARLLLKHSQDLKMPNVVLLSSTFFTSATLYSYEMFPEFNVQKLVYQAYLT  
LFPYKLGNLKGHPRTVPDNSEPLTIVRKTNGSIAIDGLVWQFMIEFAKHINATLQLPPIPH  
PEKSIKLVQILDVLRNQTVDIAASLRPYSLNVQRSSTHIYGSPMMVGNWCMMLPTERVIGS  
HEALRLMKSPWTWLILLLFYSVHRFLAQKTRLRSSLIHLIKLLINLSLICFLQAQLSAYFIG  
PQKVNHISNMQQVEESGLKIRGMRGEFMEYPIDMRSRYASSFLLHDLFFDLAQYRNSLNT  
SYGYTVTSVKWELYKEAQRHFRRPLFRYSEEICVQKLSLFSLIQQSNCIYCYRSRIFILRMH  
EAGLIRLWYRRSYYVMVTAGRFPIGDLSTVHRAQPIRWTEWQNVVLLHGVGLLFSVVVF  
VIELTVHYANVCLNNL-

>DmelIR94g

MSTAVNSVHSKLVSLISRGQELTSIFFYAPAKEKCHLEDTISSATWGLPLVIWRTDRTVILNG  
FIGEGLLVLACLPGFHWALLGSLARSLKYLRQARILIELMQDRDEFVSEVLQFCLSQDM  
INVNAIFDDFPETENLSSFEAYPSFEVVNQTFPTDQVSDLYPNKMLNLRGGVIRTMPDYSE  
PNTILYQDKEGNKEILGYLWDLLEAYAHKHNAQLQVVNKYADDRPLNFIELDAAQSGII  
DVGASIQPMSMGSLSRMHEMSYPVNQASWCTMLPVERQLHVSELLTRVIPYPTLALLLLL  
WIFYEVLGRWRRHRSRLQSIGWLVLATLVSSNYVGKLLNLFTDPPSLPPVNSLAALMESPV  
RIISIRSEYSAIEFTQRTKYSAAFHLALHASILIGLRNAFNNTSYGYTITSEKWKIYEEQKRSS  
KPVFRYSKDLFCYEMIPFGLVIPENSPHRAPLHSYTL LLRQAGLHDFWVNRGFSYMVKAG  
KINF TAVGERYEAKTLTITDLRNVFIIYVSVLLISLILFTCELFVSWVNYWLG F-

>DmelIR94h

MLSNISFSSAPELVDLYGLVLKFLVSSETTLFYFNPTGQKCSWETLPR TILSNHPQIIWFREE  
TYPGLYKRHSSNL FVMACLSSTS YDQGQLLAESLTRYRSVRVLIEVQDKEGSFLASQILL  
LCQQHSMLNVVLYFSRWTRTLNVFSYLAFPYFKLLKQRLSGSLRPKIFINQLKDLQGYKIR  
VQPDLSPPNSFSYRDRHGECQVGGFLWRIVENFSKSLKGDTQVLYPTWAKAKVSAAEYMI  
QFTRNGSSDIGVTTTMITFKHEERYRDYSYPMYDISWCTMLPVEKPLSVEILFSHVLSPGS  
ALLLILAFILF LIPQLIKCLGITFRGLIGMASRIFALVMLCSSSAQLLSLLMSPPLHTRIKS  
FDDLTSGLKIFGIRSELYFLDGGFRAKYASAFHLTENPNELYDNRNYFNNTSWAYTITSVKW  
NVIEAQQRHFAHPVFRYSTDLCFSSETPWGLLIAPESFYREPLQHFTL KINQAGLITQWMT  
QSFHEMVRAGRMTIKDYSRTNLMKPLRIQDLRKCWVIFAVGLGTSTVVF TIELLLIYTNVF  
LNSL-

>DmelIR100a

MATTLQLIMLALVGGTLGQANNTD HKQVLT SIVKQLEGGLELHLRTSEDGGNDLVQFLM  
QEKSSIIISAQKEEVPSRAKIMRHHFFIFDGVHQMQEIRTS LFNTDGFYILALENTIEDDVL



LMEFAADVWLQHGHSRIYYVQLSKKSVLLFNPFLQRLVVVQDSKTYSRITYKDLEGYHLRI  
YIFDSVYSSVIGDGENKVL SVTGADAKLAKTVARQLNFTADFVWPDEFFGGRLANGEYS  
GGVGRAHRGEVDIIFAGFFIKDYLTTHIQFSAAVYMDLCLYVKAQRIPQSILPLFAVHMD  
VWLCFLLVGLL GALVWLILRAVNLILGIEGVPDGSRATRISYFGAARRIFVDTWVIWVRVN  
VGRFPFHSERIFVASLCLVSVIFGALLESSLATVYIRPLYYRDVNTLRELDSESGQPIYIKHPA  
FKDDL FYGHNSEVYRRLDAKMMLVAEGERLIEMVSKRGGFAGVTRSASLQLSDIRYVM  
TKKVHKIPEC PKNYHIAYVLPSPYLEEVNRIVLRLVAGGIVGLWTGEAKERAKWSIQRF  
PEYLAELDVGRWKVLTLSDVQLAFYALTIGCLLSAIVCMAEILLGRQRRLHSPK-

>HmeIIIR1

MWRTVILAACLTPDPGASLGAGSAAVDYFVQKGAPYLCYLT CENKKL VHEFM DRGIRVS  
LQLIDKSCDLERNLLQWNVPVGVLLDAGCENTEDILNTASRGILFDAMHMLIKEIADHE  
GGNILNVLQRMNLSVDADVVAFDKGD RVELIDVFNYGRIQGN DLEKKYIGEWSPEGGL  
NVSLNRFKY YDRWDFHNLTLRAVT VILGDPKDFMPEMLSDVGYKAGVPLLT KIPTQLLYI  
LKDIHNF SFKYTVAGR WIGAPER NSTLAVTNSLFWGEQDISCTSARMFKHWLEWVDV FSP  
PATSFETKFY YLILDQGIGSYENRFLTPLSSGVWLWTAAGVACTVLLGVA AVLEARSEPG  
LYAFFSVFAVICQQAYEDGVNLF EEMSSSQGRRLVLLVVGITSMLLYNYYTSSVVS WLLNA  
AAPTLADMDALINS DLELVFEDIGYTRGWLDNPGFFY YSGYKNPKEDELRLK KVTRARRT  
TALLQPAAAISLIRTGT YAYHTEPYTAYQVISRTFSERELCELGALRMLGPDNVYIFGQKRS  
PYKQFFVWSLMRLLERGH TSLASARVSGPRPTCSGRAPRALALGQAAPAFALG YAALLS  
VIIAVVEVWFHKAQNK KQARGEFDNRAHNAERSDF FSEA-

>HmeIIIR7d1

MNSSSENLLYTDLSVLENMGR AA KIAFY NFDWRYVALV VHNALNMISLEIFLKHYNKS  
VVLKFGKFIPQKRLT VIPQFVIFGKDSNDVINILWLNKLYDNSGKYIICAPYGYEDKCDE  
IDIFVTL SRVYIVNAIYIRPKSEAD FEMFAYDIVVPEK CINNVPYKLDVSN NCTND DCFINLY  
PRKLTNFYK CPLTVSTFHQPPF MILNNETSEPSGGDGEILKILISALNATL KIKIPAEGNTWG  
RYYNGNWTGSLGDVYNNHAHMSVCSLPVSARKYANFTTSFIYNSMDIVWTA AIPLQKPS  
WEKLMNPLDTSIRVGLFLIFSCIAIINAVTRLDIWRIRMV LKIGPIRSSLLFY SWALFLGMSI  
IKLPKNRSL LILVYSWIWYCFVIRNAYQAALMNSLKNKIYEEDYPSLDSVLKGRHLYGGLP  
ALRQYYSDDPFIYENWKVLD FNESYNILDQISEGTSDFVLA FNKENIIEYLMESNGDKRLQ  
IIPQKISSPIAMYFKKHSLMASPVNRILSFAVESGFSQIVHRNYLRHKKYLFQLTRHKEYNP  
LTLDNFKSCMLLMVAGWLLSLIFFV VETYCGQLEEDE-

>HmeIIIR7d2

MVANRYMESNIQFNDCVHIEM LAKSAA RIALHNFRWQYITLVLLNTAVYCGANAFLESYN  
KTAVIATKKWKPD LHKITKQFVLFGNDLGSILNLLAWMNDHKFDNTGKFLIICQSMVDGD  
CDKLKAVEMFWHHKIVNIIFINMPNIGAKGYTYDYGSNCQNSPATEVKDWNNCIKMDQ  
KYCKNKYPIKLRNLHGCP IIVSTFMQKPYMNFSTGTPTGADGDLLNIITALNASLTIRTPFK  
GDGWGNLDENGTWV GSLGDLFYDLANFSMTSASITETRHRDFQISNFYYSIILGWVTHPP  
EKEMASYKLLRPFKMDTRIALIISFGIVVCIVLFLKTKFCTIIFKQFSSGRDPENVLFLSWLM  
CMGQPTLTLPSKMALS YLVLIWIWYCFLMRTFYQVHLINSLKNDIYLNDFSSINDAIKANY  
PFGGGSALKDYIDQHIIYNNWKHKDSSEYESLMLNLTHGMR FVLAMNLATAQDFLKEP  
GRNLHILPQVILNCPSSIFFK KFSPLAKPINKILERLIEFGWTD MFFKNSTMGNNIQKTASED  
KPITLSNFAGCYLILICGWLSSLIFFFLEIHLMKRHTQPIIPYRN-

>HmeIIIR7d3

MRILVFILVIFKIINILECTFTINKAVSIANKVFTYHKTA VVWWSFHVSDINKFLQQFRGTVLT

VSIENHANFNDSHFHKKIPYIQTIFAMNPYEFDYFLEKVNYVRTVPINLILVLNEEYDTNL  
TMYTKIAWEKDVSDILIISNNSSNEVIVSTFKPYRDGVCGDHTPMDLKT DSEQFFMRKYTN  
FYKCPIRITLLEHKPYVILKFENDTVTSVTGMEGNLLMLLLNVLNSTANIVSCRDHGGFSG  
TINGTMGFSDLYYNRADLMVPALIMQVNRVLYSQISYAHDSMHIVWCMPTRRREIYEWAK  
VILPFFNILTPFIIVSFLIMLV TINAVKKYALLQDNSKNDVAFRLLGIFMGQDTTYLSRYWL  
NSLFVCWIWLCMIIRISYQGNLVDGLQKTILEPRLSTLEEAVD VVDQVGGMRVDFYRN  
TSLEKKYVQFLVKNVPELKKVGDGKRNLIAADR TLVQFYRHNLEILDEPVM TTPICIHMR  
PRWPAAPEISQLSRVVEAGLYTMIIRKEHSTWMILYGNLTETYEFKPIKKTFFHSCFYGLII  
MYVMSSLVLVGEICFNRYKRREKY-

>HmeIIIR7d4

MAVFVVFVLSFIITSATANLTIKNEHNPRNEHVIDSATDIANSYFNFRTP TVVVSKEVDKVL  
VTKFIQSYRGLIILDHTIGGPPKQVVIIIESYYSLIRTLGKLPDLKGKTL LHSGAHFLIVVLA  
TPHRLQRINSILWDYATNVVIVIMNKNKIVLYTYYPYKNHLDCQNI EPALIGFWDDGAV  
LEKDLFPDKMSDMKGCPLYISTNKVYHPATEQKIPLEIIKRAIIRYLRDVMNFTPISSRDYL  
SIDSDGAKNWSETLDDILTGSANISTCSISPGMDRVGILDYSIPYFRISIAWLG PPLPPGPIWW  
RLLSPLNGYLWLAILLVVIIVKSIPFIMKIGRVKQFCSQYFKNSNKLDG VVIRIWAVMMGQS  
IRVKPRRFRDLYILSLWIWFTFVRSAYQSVLIGALKSDIAVVRFDLQQA VDNNGYSFGGR  
AGVLPHEHDPFIRDGYEILQEEEFERVLQEVLEGKKTIFIFAISLEYVWAYCMAQGINENEC  
GHILPDSIMTVPLVIWMPKNSAFKRSLSVWLIRFLETGLLEKDTMKMSSTASVLKST DPSA  
LEIEQVVSILCLAVGYLISIIVFIVEIILFKMKQSSIVKKSNNFLKHISK-

>HmeIIIR8a

MDLQLLFLFLLINLGCVISELSLRFVITENHETELPQEISRAIKATEQIS PGLLINEDVIQLDR  
ENDEESFSKLCASLSKGVSSIIDLSWSPWEKIEELSSTGLVIVRSL LGSQQMIRGFDEYLESR  
NATDAAIIESESDVDQALYELLGRSHIRI WVHAGLTRDSAKALKNMRPEPSFYVIVGDNN  
FVTSTYKRAVKEKLVKRPYRWNLITDYKTLDPSILVLPVAVLQSDKAD CCKLLATKECSC  
AADMQKKQHILNLIK YMAESLSRIDSDQIVNIDCDNQQGMNATKEKLYQIFDEDSLSN  
ETLFYWDEERSGIYHRSHFVLSTYKPESGLQRIASWSADDEYKLLPGVTLEPLKNFFRIGT  
SAAVPWTLPKYDPETGQPMFTEDGHPIYEGYCIDLIDKIAEAMDFDYEIVTPKTGT FGRRL  
PNGSWDGIIGDLMTGETDIAIAALMTAEREEVDFVAPYFEQTGILIVIRKPIR KTSLFKFM  
TVLRTEVWLSIVAALLLTGFMIWLEKYSPPSARNNPDAYPYPCREFTL KESFWFALTSFTP  
QGGGEAPKALSGR TLVAAYWLFVVLMLATFTANLAAFLTVERMQTPVSSLEQLARQSRIN  
YTVVESSTIHQYFINMKFAEDTLRVWKEITLNATSDQSQYRVWDYPIREQYGHILLAINA  
SGPVPDAKIGFQQVNEHPEADFAFIHDSAEIKYEITRNCNLTEVGEVFAEQPYAIAVQQGSR  
LQEDLSRTLLDLQKERFLEQITSKYWNESARQACPDAD ESEGITLES LGGVFIATL FGLGLA  
MITLAWEVFYYKRKEKNKVT TIDATLEKKEAFIEKIPKKFEGIVKLK KRNKKSGNIVKNVT  
IGDHF PADKGISYISVYPKNSDYRP-

>HmeIIIR21a

MKFIIQILLTLNLTCVLISCNEKYITKFLNNGEKSILRYHQLFSKTYRKS RNFHKKHIKETKI  
QKLFMNTSMKT VITKR NADPVFHGHPKTREEK WHEMFLSQTKTFDQNP SLIQLIHNITLT  
YLNDCTPVILYDDRIKAREGYLFDL FKSFPVTFIHGYIDEKDIIKEPRL LQPRYECFH FIVF  
LSDVKSSAKVLGKQSKSKVVVVARSSQWAVQEFLAGPLSRYFINLVVIGQSFKDDDNSEA  
AYILYTHILYTDGLGASKPKVLC SWSHGKFSRHVNLFP TKMTKGYAGHRFVVAANQPPF  
TFRRHTDADGGNPKIWDGLEIRILNLLAEKNNFSVEIIEPHSGELGPGDAVTNEVAMSRA  
DIGVSGMYVTSERTSNIDMSFSHSQDCAVFITLTSTALPRYRAILGPFHWHVWVALTFTYLI

GIFPLAFSDKHTLRHLINDKGEIENMFWYVFGTFTNCFTFVGKKSSWKTTKITRLLIGWY  
WVFTIIITSCYTGSIIFVTLPIFPETVDTIQQLSGFYRVGTLDRGGWERWFINSDDLTKL  
FKKIEFVDPVKAGIRNTTKAFFFPYAFLGSQAELEYIVQSNFMSSESKRSVLHISDKCFVPF  
GVSIGFPNNSLYGTKLSNDIRMLQAGILDKLNDEVRWEMQRTSSGKLLSVGSSDLLKIAS  
IEEKGLTLEDTQGMFLLGAGFLLAAVALLSEWMGGFSRGCIFGRKKTSSITS AKKLINTP  
QNSVEDIHFNSGPRSDLHFISRSPSNESQDTLEGHIIDVTQEAITVHKNFDEHKWDSRRSSS  
VELDREVQVIFQKNSSKDLEDLVNDKSEDTAKDVFGDYL-

>HmeIIIR25a

MANMFEMKVFVFAIYSLYLIPITVAQTTQNINVLLVNEENNALAEKSFEVAKEYVRRNPSLG  
LAVDPVVVVGNRTDAKAFLENVCRKYNDMLSAKKTTPHVILDFTMTGVGSETIKSFTAAL  
ALPTISGSFGQAGDLRQWRSLNANQTKFLLQVMPADILPESIRAIIVTKQDITNAIIFDEFF  
VMDHKYKSLQNIPTRHVITPVKSFNKDEIKAQLRSLRELDIVNFFVVGSLRTIKNVLDAA  
NDNQYFGRKTAWFALS LDKGDISCGCKDATIVYMRPTDAKSRDRLGKIKTTYSMNGEPE  
ITSAFYFDLSLRTFLAIKSLSDSGKWPSDMKYINCDDYDGKNTPDRA LDLSAFQEVKETP  
AYAPFFIPEDDLINGRSYMEFNTDLTAVTIKDGASIGSKSLGSKAGLSNPLLLTDPDNMSD  
YSAQLVYRIVTVEQQPFIRDDEAPKGFKGYCIDLIEEIRQIVKFDYEISLSPDGNFGTMDEN  
GNWNGVIKELIEKRADIGLTSLSVMAERENVVDFTVPYYDLVGITILMKLPRTPTSLFKFLT  
VLENDVWLSILAAFFTSFLMWVFDKWSPYSYQNNREKYKDDEEKREFTLKECLWFCM  
TSLTPQGGGEAPKNLSGRLLAATWWLFGFIIIASYTANLAAFLTVSRLDTPIESLDDLSKQY  
KIQYAPLNGSSAMTYFERMANIEVRFYEIWKEMSLNDSLS DVERAKLAVWDYPVSDKYS  
KMWQAMKEAGLPNSIEEAIERVRSSKSSSEGFALWGDATDVRYYYVLTSCDLQMVGDEFS  
RKPYAIAVQQGSPLKDQFNAILQLLNKRKLEKLENWNNNPKAIKCEKQDDQSDGISI  
QNIGGVFIVIFMIGLACVTLGVEYWWYKWRKRPTIGEITQVMCGNLY-

>HmeIIIR31a

MLPTKVIADLFHYRTISSVIVLTCWPYFDRAKFIKRYNIPVTISCDPAILDVVDPYKLGQ  
VLYIPSPKILEHKIKQKYFSNWKWMILNNTIPHFIQNARYDADILLKPSPTYNNSLETE  
DITIYDVYTHPRDDASVFLWAHWDLHAGLQVLFDKERIDRRRNLSKYPLKIAAPLGSYSN  
NTYNGGFLEYLMDMSIRERDSGVRIGYSSSSLIIEILNATEILLPTLLWSTEIHSSMILELKY  
GSSELSGGVLRMLKERFEKLDYIMPIWPFHVGFYLAERESSNMFLPFTVN VWWCCLI  
LFLILAAAQKVTAKSKEEKEGAYIATLATFLQQDASAVPKGISGRWNFLVLSISAMLIHAYY  
TSAIVSALMSTGRSGPDSLRLSGDSKYAIASEDYDYMRYLMFDVKTNRDDLEYLKKRKL  
PKFYQDVHAGVCLIQTGSTAYHTEYNQLYPHLKTFTDDQLCKLQYVDTVPEVLSWITTTK  
RGQWTNTFKVAGAWLQETGLAHLVSRVRIKPPPCRAALLAERVNIHDIMPVLICTFAGAV  
ISLILLGLELFVSKFKGKWLKSSSDSIEVFDVDDPIY-

>HmeIIIR40a

MKMKILLLLFHIFIYCKNTECLHNIEAMTNRSLERLPKDFSKAIMDIAIGLPTNTLTIVSSNT  
TNLRSEDLFKIMCLLAENNIQVINLDITSENKEYYFSYLKNGLDTSEERTSLIFCDSYECENL  
LFEITINNFHRSMLYIFFWPRGEISTLFLSGIKEAIRVAVITNPRPGVFRLYYNQATPNKLNH  
LTLVNWWSGSLYKSPALPPADKVYQDFQGRIFDVPVLHAPPWHFVIYNNDSTVNV TGGR  
DDKLLSLLAKKLNFKYRYDPPERSQGSRIAGNGTFKGTGLIWKRAFFLGDVTMTW  
ERLQAVEFSFLTADSGAFLTHAPDKLSETLAIIRPFRWEVWPLVGATLLITGPALWIVIAAP  
SLWQRRQTDQLSLLNCCWFTTSLFLRQASTKEPSKTHKARLVGILISLGATYVIGDMYSA  
NLTSSLARPTKEQPIGTQLALEEVMRDKGYELV VESHSSTLAILQNGTDVYGR LARLMRR  
QHIQRVRSVEHGVRLVLSKRRVAILGGRETLYDTERFGSHNFHLSEKLYTRYSAIALQIGC

PYLETFNNIVMTLFEAGILAKMTTDEYKNLPEQSRRSNPVTESDSKENTDVTENTQNAQP  
QNESTIGLEPVSLTMLRGAFCLLGIGYFLAGTVLITEIHIQRKKKNQNLIKIPDESTNQLKSS  
RFYLKHHFEKIFKIMYILIDRALRHDARD-

>HmeIIIR41a

MIPLPQALTALEILLKILIGQYLNSSYCITIISDEYLFLQSPKSFMYIYASNNETLTYQMLNAS  
EMGCSDIYVQLNEPNMFFVAYENVARMGNVVRKGDRIIMLPTFHHLINGSSDVILNVLSN  
REASFLANILLIMKAESSPECHIYDLVTHKFGVIEENDKPVVLDWSNSCTEEFEKNVYLF  
HNMSNVYGVKIVKVTAFYKPYVLLDLEPNITPNGRDGLDIRIVEEFCRWINCTIEMVGDDG  
REWGDIYDNRTGIGILGNVYEDRADLGITALYSWYEEYIVMDFSTPYVRTGVTCVAPSPRL  
LASWRMPLLPFNLYMWICIFFTFIYASLALMIAKGFSTTDIFLTTFGIMITQSQPESGFSTWR  
TRSVIGWMMMTGLVLDNAYGGGLASTFTVPRYEPSIDTIKDIVDRKLIWGATHDAWTFSLI  
LSQEPLLKLVKLFRTYPSDLKRRSFNRSMAFSIEKLPGGTFAIGEYITKEATFDLIMLEE  
YYFEQCIVMMRKNFYTHKLSKLIGRLHESGLLAWETQIALQYLDYKVQLAVKLSRSKK  
DVENIEPLALRHVEGIFIIYGVGVVISIISFVIEIIQKRNKR-

>HmeIIIR60a

MINILNIISLLSIGVGTQSFYMQKTIHGTYSRTSTTAVTSCLKHIIQENFINPGFLVLACPKE  
PSAKIFNIRRDVLKFLHKTEKYAVEITNPDDIPIFNNNVNINIEFWSFDPFNFTPTADYFLIILD  
NYEDFTYIARKIIRSFRWNPQAQFIIILFQLNNTDTNKRRTAERILSCLFKFNVVNVIICIPSM  
KNVLNTLIYSWQPYDPPNFCGHFNETAENRTIVLNYCENGKVYVNDLWINKLPLDMQG  
CTLRILALERQPFVSINKFDPNIEKWLINLLFKKFNFSVEYEIINAFRGERNEKGLWNGALK  
ELSARKGHILLGGIFPDYDVHEDFECSSSYLSDSYTWIVPRAYPSPWVSLHIIIFQNLVWFS  
AIAGFITCVLTWVFLGHLKDSNYNQSFHGCFNLTWLCLLGLVAYVRPNKESLRVFFVFLN  
LYCIIFLTAYQTKLIDMLQNPSFQDQIDTVEKLLQTDLKIGGSEELHDLFYNSTDPFDQLIDK  
KWITISNMTKAMHDVAVNRNLSVLCSEFVHLSSVLPESLSDSNHNNYAFPLNAFVPL  
EIIALRGFPFIREISRDLNKYKQLGINAKVRNYFNVLSMRKRSRLVNTSKIEGKFYALSQVH  
LQGGFFALAVGAFGLLIVLIFELLSTTTYTSRQRQLKGGK-

>HmeIIIR60a1a

MWVALILISLYSPTYEFKDFPDQNNRLEKCLCHIIKEYFSHYSLTYVDLQYENEDIKIVHS  
LTAVPLLAKSNRLSKSSLDESYLIVAENVTFNYHIISFLVKEPSWNPNGRFLILVGNKGGMR  
KIFDILLEHHIVDVLLSDFINPNLYTYNPFENYGCGRRYDRIIEFGKCIEAENLNLYPKLL  
TALENCVMQIVSPHWPPYTINPLKTAKTQMGIEEYILREISILEKFSINFTTDDAETFTMIK  
NDMSAVGPLYSLQEGKADIILGGMILTHPRAKAFNYIYGHLSFVEDIRFQVQKSSAVPSWK  
NMYLEFHSIVWTLFILTFATFFIIFILVKPKDKGQIILKMFAYLFLNGRKIGGNYFTKFLFIW  
IWFAYLINTYYQSSLVSLITNPSLNYQVSNEKDIEFNKPCVSTGIRKYLLSVENISLETLD  
RDGCETMLESIKAVSERNDIYTVVLHSVYKYNEYKFFDDWGDPLVYTFKQPLSKVVYAIY  
VNKGFPMLERLRLQALRLRENGLIYHYTRNMHWQNNRNYHFFEKTRKFYIIVPWYILAG  
GYGLSIAVFFLEIMIKKHSSKMHNLLINCHTSI-

>HmeIIIR60a1b

MLVAITLVCFCIYPLNEAYITKVQSNTEILKQVCNIVKNYFSNYSVITYLDLYYDSDEIYE  
ALHSLKSINVIQRDKIIGVKNMDESILIASSNTSTLIKVFPLIQREPSWNPAYFLLIKSLAE  
RELKEVFDILLKAHVLNVLVLNGHSDPDIYTYNPNYENYGCGRRYHRIIEYKCLSPNTEN  
WYPYKLVGTLENCTIRVTSPhwppysidpnrnnsHVGVEEFIFRQMGILEHFQVEFYSD  
DAEIFTMINNDMAAVGPMNLIQSDVTDVAVLGGMILTHTRAHAFSYVYGHLSYTDEIRYQV  
QKAQPVPTWKYMYLEFNILIWIVFVLTFTITFFLIFITLVKPGDKIRVIFVMFRYLLNGVRIK

GTYFTKYFFLIWIMFAFLINIYVSSFVSIATDQPVSYQISNEQDMYDYNLKPVCVSDLMRN  
YLLSVENMTLGKNVGENCNGLLDSIQTVSTSSSIYTVVLYSIYMYRRNQFYNRFGNPTTYS  
FPKPVSKIVYAIYLYKGFPLVEKLTKHAVRLRETGLIEYHLKDLHRQENKYMFARETRKS  
HVIFPWQILTVGYVVCIVFLEIIISKKLYLRKLILPSQRNVIT-

>HmeIIIR60a2a

MKLLTMLLQIFLIIFHISDNIAVSQNLNSVLSTSNLHDIYENAVTQCIVSTSYKYIPCGTHYT  
LVSSTYFIDGVNSLLSYKTCYTFLSRSFETRKKWKTWTDVYIFYIKNYEEMYISFTTLSKDG  
WNSRALFFIVIDDLYKSEYSEVFNILLNHNIFNVLLITKSNGHFTAYKYDAFDEGNCGQ  
KIEEISDCRNLSVRFNYTYLENKLRNCTITVAAFEDMPNVIFHTKKVSKIPQWTEKGLEQ  
YIIDNIAEKENLTIKYIYDLTHGNGVVLHNLTVTGVLSYLHNNTASVVIGGFALIKNRIKLF  
YISGYCTYNLCLFTPASVEETWKKVYQEFGISTWLLIGLTYIFAAVVITVTRRFLGDEDRK  
RIILKIWGYYLYGQTDVLIKTNKMKKIVIFWIWFTFFMTSFYNSALCSLLTRNVKVNTKIDT  
SSLSALPWELLPCISNVARTFYQFTFNETFSGNTNANCKLSEDVLDTIANNVKYFGLDADY  
TYQMRKCKYIDENGNSKINSRHYPNLMLAMYTTTRGFPLHHKFQKYTTFFHESGLLQRQ  
RAKIYHQLVTPSHHYKETFKILRLSDFRIHYAVLIIGYTVSLILFIIELSLNKVLQTFNNYQ-

>HmeIIIR60a2b

MKLLNMLLQIFFIIFHTSNIAVSQNWNSDLSTNNILHDIYENAVIECIVSTSYKYIPCGTHF  
TLVSSYFIDGVNSLLSYRSCYTFLSRSFETRKKWKTWTDVYIFYTKNYQEIYISFTTLSKDV  
FWNSRAVFFVVDLYKSEYSEVFNILLNHNIFNVLLITKSNGHFTAYKYHAFDEGKCGQS  
INKIEEISDCRNLSIRLNYTYLENKLRNCTITVAAFEDMPNVIFQSKKVGKIPQWTEKGLE  
QYIIDNIAQKENLTIKYIYDLSHGNGVIFYNFTVTGVLSYLHNNTASVVIGGFALIKNRIKLF  
EYISGYCTYNLCLFTPASVEETWKKVYQEFGISTWLLIGLTYIFAAVVITLSRRFLLGDEDR  
KIILKIWGYYLYGQTDIVLIKTNKMKKIVIFWIWFTFFMTSFYNSALSSLLTRTVKVNTKIDT  
TSLSALPWEPICISDATRTFYKFTFNETFPGNTNANCKLSEDVLDTIANNVNYFGLDADYTY  
QMRKSKYVDENGNSKINSWHYPNDLMHAMYTTTRGFPLHHKFQKYTTFFHESGLLQRQR  
AKIYHQLVTPSHHYKETFKILRLSDFRIHYAVLIIGYTVSLISFIIELSLNKVYYIYSTINH-

>HmeIIIR60a2c

MKLVTLQISFIIFHFCDYLATSQGLNSNLFTNNYLHDTHQNSAIDCIVSTSYKHIPCGTMF  
TLVYSSYFIDDVNKLLSNKNCYTFLSRSFEIRKWRWTDVYIFFTKNYHEVYTSFTTLSKD  
VWVNPRAHFFIINDLHEAEYSEVFNILMNLNIFNVLLITKSEKGIFSAYIYHALEGGNCGRS  
LNKIEKINDCRNSYSVKINYTHLDHKFRNCVISIAASEDMLNVIFESKKVNRPRKVERGIE  
QYILDNIAEQENLTLQYINADSKHEYGVILSNSTITGLLGYLHNNTASIVIGGFLLMRNRISL  
FEYIWGYATGNICIFTPALGEENWKKVYQEFDVGWLLICFSYLFVTVVITMSRRLMGHE  
DKGRVILKIWGYYLYGQTDIELMKFKKMKKIIIFWIWFTFFMTSFYNSALYSLLSRNVEVKS  
KIDTKSLSTLPWEPICISNAMRTFYKFTFNETLPGNTKANCNLTDDALDTVANNKIFYALE  
MDYSYHISYNKNGNPKLKSQWQLPSDLMLAMYTTTRGFPLQHKFQKYATFHLESGLLQRQR  
ATISPKYVTPNHRRRNTFKIFHLSDFRIHYAILIFGYTISFVCFIIEINHNYLRY-

>HmeIIIR60a2d

MKLFTQFQKFLMIFHIYNNFVTLHGLNSNIFINNSLYDQNSAIDCIVSASYKHIPCGTMF  
TLVYSSYFIDDVNKLLSNKNCYTFLSRSFEIRKWRWTDVYMMFFTKNYHEMYTSFTTLSK  
DVWVNPRAYFFIINDLHEGDFLEVFNILMNLNIFNVLLITKSEKGIFSAYIYHALEEGNCGR  
SLNKIEKINDCRNSYSVKINYTHLDHKFRNCVISVAATEDMPNVIFESKEVNRPRKAEKGI  
EQYILDNIAEQENLTLQYIYTDKHDYGFILSNSTITGLLGYLHNNTASIVIGGLMLMRNRIS  
LFEYIWGYDTASLCLYAPALSEENWKKVYQEFVGTWLLICFSYLFATVITMSRRLMG

HEDKRRVILKIWGYYLGQTDNELIKLKKMKKIVIFWIWFTFFMTSFYNSALYSLLSRNVEV  
NSKIDTKSLSTLPWEPICISNAMRTFYKFTFNETLPRNTKANCKLTDDALDTVANNNKYYA  
MEMDYSYHMREPYLYDENGPNKLGWQFTSDLMLAMYTTTRGFPLQHKFQRYATFHLES  
GLLQRQRAAIYHQYVTPNNHHKKTFKIFHLSDFRIHYAILIIGYTISFVCFIIEINGSYVRK-  
>HmeIIIR60a2e

MKLFTLFQKFLIIFHICDYFATSYGLYSNIFIKTLLRDTHQNLAVDCIVSASYKHIPCGTMFT  
LVYSAYFIDDVNKLSSNKSCYSFLSRSFEIRKWRTWTDVYIFFTKNYHEMYTSFTTLSKDV  
VWNPRAYFFIINIHLREVEYSEVFNVLMNLNIFNVLLITKSEEGIFSAYIYHALEEGSCGRSL  
NKIEKINDCRNIHSIRMNYSYLDHKFRNCIISVAATEDMPNVIFQSKEVNKRPRKVEKGIEQ  
YILDNIAEQENFTLQYINADSKHEFGVILSNSTITGLLGYLHNNTASIVIGGLMLIKNRVSLF  
DYIWGYDAASFCIFTALREKNWKKVYQEFVGTWLLICFSYLFVTVVITMSRRLMGHE  
DKGRVILKIWGYYLGQTDMEMIKFKKMKKIVIFWIWFTFFLTSFYNSALYSLLSRNVEVNL  
KIDINSLSTLPWEPICISNAMRTFYKFTFNGLPANTKADCQLTDNALDTVANNNKYYALE  
MDYSYHMRQTYLYDENGPNKLVWVYASDLMLAMYTTTRGFPLQNKFHRYATFHLESGL  
LQRQRAAIYHQYVTPNNHHKNTFKIFHLSDLRVHYAILIIGYTISFVCFIIEINRNYLRN-  
>HmeIIIR64a

MDLLKFALILNFTIIMVLPVPVYIEILKSRNIGNVILSHCNRNIIESQKNLIANNIRSVFLANS  
TDSLNSYAKVGFILDTHCESWNQIFNVVDERFFRGPFTWLVNTDDLNSTVDVLSKYPIDI  
NSDFIVITKNRKVFNLVEVYSKGFYTNGSFIVRDLGHFDSSELHLKRNIRADLTGVVLKCVV  
VIVDPIVNETFEHYLENTSPGKLIDSVHKLKFFRLMKYLQNIYNFSLMLQRTNSWGYLRN  
GSFDGLVGLSQRADADIGSSIFYRSDRLKIIDYVTSTWQTRHCFILRHPKYPPGGFYTIYTG  
PLTDIVWYWILFVLTLAGLVTCIMLKIRAIKRPGDDEDESSSMALIFIFS AISQQGTTLNRSI  
SIKIVTFVTFIFTLTYQYYNATVVSTLLREPPKTIRNLKDLLESNLKVGVEDVLYNKDHF  
RTTDAVTLELYHKKIVTGKEYNFFKPDHGMRLVKAGGFAYHIDSIIIGYRIMRNTFTEREICD  
AHEIYLYPPQKMAVTLQKNSPYREHVVIGIQKIYESGLMYRLKSVWDEPKPQC VHTPDSS  
VFSVSLREFSSVLMIALGMVLSVSILFLEIIVGRYKVKVYDFCH-  
>HmeIIIR68a

MAGALVKLVILITIVLSSTVKGDVGAIVEDLQIRKDLLEVLLIDILNGLARNDAVTCLTIICDD  
VYLNVFEGALFIRTLDPYIMIVVEDYEDLLSPNYNTLEPLRQARNDGCNVYAILMANG  
QLTRLLKFGDRYRVLDRAKYIMLHDVRLFHSNLHFIWKRVNVVFIKYHRKVSSKSEAW  
FELSTVPPFPNIKGFISRRVDIWKNGKLHYGRDLFADKTGDLNGELLNVVYFDHLPSSVI  
MKSSNKVGGVEIEILNTLAQKMRFPKLYQSIDPKFKWQKLSNGSYSGLLGEMVHGK  
ADMALGNLQYTPNHLELTDLSIPYTTQCWTFLTPEALSDNSWKTLLPFTLYMWIAVLMV  
LFVTGSIFYGLAMYYINLLDYRADS VHVKKQKIHYDAKPVGLYLFGTEITNSILYTYGMLLV  
VSLPKLPTGWSIRLLTGWYWLYCILLVVSYRASMTAILANPAPRVTINTLKVDSKIACGG  
WGEETKVFQQLDEIGQDIKMFVEVNDPDEAARKVAKGVFAYYDSSDYLYKYSVKKR  
NDMNFNNTINASFYSNSNERNLHIMTDCVVNIPISIGFHKNSPLKPLADVYIRRVIVGLV  
EKWLNDAMYRIRSMDTTEEEVKALINLKKLYCAFIALAIGYTISLFLFGEWLHWYIYM  
KDPNFDKYALDIYYKNKNKKT-

>HmeIIIR75d

MRGRAKRTFNSSANMDFSFIVAYCVSKKLTLLITAFLCWGPDDINKLLKLSRDAGLRVRVH  
TDLTDPHLLPDLPAYRTFREGMLLDTHCDNVSQLLNKASDTRAFNLRHSWMLIDDSFYNF  
TNVDNILSDTLIPDGVDVTWVSKDTMVDVYRVKRDQDLMALNLGFRDSQLELELERLWL  
KLPTTVTRRKNLNNVYLESATIVTQPQYFKGWSDLSDRQIDTFPKVTYPLMLCGQDLNF

RFNLKQVDLYGEEHNGTFDGLVGRMQRGELEVGITSMFMRADRWRVHYS AETIELKGA  
FLFRQPSRS AVSNVFLPFSRGVWAACA AVFAGAGLLLT VFGHVARQNVLDPTAQR LTLPE  
SLTYAIGTICQQGSDLS PQLWSVRLLMFCTLLASLFAFTSYS AKVVAILQAPSDALNTIADLT  
HSPMDMGVQETTYKR VYFAESNDPATQALYRRKLLPLGERAYLSV VEGIARVRTGLFAFQ  
VEQSSAYDIISKTYTER EKCGLKEIKAFTLPMVAVPLRKHSGYRDLFASRLRWQREVGLMD  
RFRRVWMS SRPKCDEGRGGFVSVGLVDVLPAAQALLAGMLLATAVLLAEKLYYFVKTLV  
QPNLWSVAEVANIK-

>HmeIIIR75p1

MNRTEYFLHQIVILADLSCPGADGFLMQASDDGYFKSPYRWLLLDPERG PLKFNILEKLD  
LPLNSDVVIAKKVNGENYQLIEAYKISESSNVIYTTAAWTPARELRS LYKLEIKENTKNM  
SFSLTENDNSKNLMTSKYGTIEDYRDSKIISVRRKNLRKHTLTIANVITDSNETRQH LDDRL  
NLHQDSITKMSY MVVKICFEMLNSTEKRLFTHTWGYKDKNGNWQGIIDHLLKKEADIGT  
LTIFTQERMKVIDYI AMVVGSTAVRFV FREPPLALLENIFTLPFTGAVWIAIAICVLGCALFLYI  
TSKWEASVDMHPLQLNGSWADVLILIGAVLQQGCTLEPRYAAGRCV TLLL FVALTILYSA  
YSANIVLLRAPSSSV RSLNDLLNSPLKLGASDFEYNRYFFKKN EPIRKAIYNKKIAPK GK  
KPNFYTMKEGVEKIR RGLFAFHME LNPGYRLI QETYQEDEKCDLVEIDYINEIDPWVPGQ  
KRSPYKDLFKINFIR ETGVQSNIIHRLHV GKPRCSGSISAFSSV GITDMYP AVIATLYGML  
ISVVVLFLEIVYKR LLLLKERRMAVKNLYF-

>HmeIIIR75p2

MKLFSLLIPIFIYLVQTKDENEISFIKEFVNNERKPTFVIFSNLCWKH SKKIMLFRKLNEAGI  
RATTNFQAISALQDHALLFYVDLDCPKAEV LNVSKLLRSPYRWLAVHDRSSNKFNISKL  
WELPILADSDFLAEKDQNI FTTELHKPSNGPTYTNPRGFYNGTLKDTRPHRELFR RRQ  
NVMGHPLTMANVIQDSNTTQYHLPREDRLKLHFD TIAKMSWINVHIAFEMVNATPRYIFS  
HRWGYKKNQWSGMINDIKTGRADLGTNCVAN TERLSVVVFTDSIAKFQVKFIFRQPPLS  
YVANIFTLPFSVNVWIALVLSIVGSTFTILLASKWEAVKIGTNPTQLDGSIGDAMLLTMSAL  
SQQGCYKEPKKLSGRIMLWVIFTALMALYAAYSANIVVLLQAPSTSIRTLEQLANSKITLAA  
LEV DYNHFVLKAGKDAVRRKIYKKIEPDKGK PQFYDLNEGVERVRKGLFAIHILT GQLYR  
RVEETFLETEKCDLVEVDFMNI VHPFVPVYKHSPYLELLRVAFKRIHESGIQMAVDRRLSV  
RKPRCSNKMSSFSV SLLNIRPVLMFMLIGIGISVLILILEILHDK-

>HmeIIIR75q1

MSEFNKMTPPKRIQFIDDIDDIFDSFQQHNTL FIVDTDCPHSGGFLEKANRTQKFRNPYRW  
LMITKPEKNKTSLSLRKIKILHILIDADVLISERHGDAFSLYSPYK LQSNNSEWKIENFGTW  
TRERCLNNNKEMFSELSMRRKNVQHLPLPTSIVITNNKTKKSLLSLKEPDIDLVAKASFRQ  
LAPLYQFMNATLV LHFTDSWGYPVNGTVNGMMGALANGICEIGGT VIFMRPERLSLADFI  
AAPIMPTVRFVFRQPSLSQQNNLFFLPFKPVVWGCILGLIFFIFIALIITKWENSKTEKENS K  
TDTTIQADSSEIAMMIIGAITQQGSYTELKGTLGRIVMFITL FVVFVFLYTSYSANIVALLQST  
SNQIKTLADLLNSNLELGCEDTLYNRY YFKMVTDPVKKAIYEQKIAPRGSQPNFMSLHEGI  
LKLQKKPFAFNMFLGSGYAAVEKYFLEHEKCGLQEITYVDEKLPWLTCRKN SHFKEIYKIG  
FTRILEHGMNSREYRKS FVKKPVCISRGGTFDSVYMRDFYPALLMLAYGMILSVILVLEIL  
HWRRFKTIQFTL-

>HmeIIIR75q2

MSIGYVMAKIPFIILFFKYAFSEKVIETNIIANIIQTLERPTTIIVITCLTPY NKVQFH SKLAG  
RNSDKRNLI EFIHPGEIPKNIENNHILFIADLGCQNVLD SLKIYDNLKLF RSPFRWIFFNKN  
CDNINFKRTIQNITDINILLDSEVLVIQQYCGYFCEIYYTYKR SSESEWETELYEKWNITNG

MEKKS RHNEATAIRRLNLNNYELKICYVLTDNDSINHLTDEVNDHIDTITKVNFPPTNQLL  
DFLNASRKYIFTETWGYRHNNTWNGMTGYLVRQEVDIGGSPMFFTSEMSVIEYISSPTPT  
RSKFVFPQP KLSYENNLFLLSFKYSLWIGSIALIGLLYLVICAVTIWEWKKSSSKNGVESV  
GILRPNLVDIALFIFGCTCQQGSVVELKGS LGRMVLLLLFVSLTFLYTSYSANIVALLQSSSS  
QIRTLEDLLRSRMKFGVHDTVFNKYFFTETETEPIRR AIYETKVAPPGGTPHFMSMEDGVK  
AMQKGLFAFHMETGVGYK FVGKYFEEGEKCGLEKIQLRVIDPWLAVQKNTQFMEMFKI  
GTKRLQEHGLQQRENHLLYEKRPKCSGRQANFISVSMVDCYPALLILTYGALLAAMVGV I  
EILYYRRAEIMSKIK-

>HmeIIIR76b

MAGVELILATICNATFCDNIFDNPLD TQLTARQEEIQDLKDEVNGKHLKIATLN NYPLSW  
TEKLENGTIVGNGVAFI IIDL RQKFNFTFEIVLPEKNVEMGTGKKPDESVINLVNSSKADM  
AAAFPLMLVKYNKLVTF SNDLDEGVWMMMLKRPKESAAGSGLLAPFATYVWYLILA AVI  
CYGPCITLLTWLRAKCVKDNEYHISLSPSVWFVYGAFIKQGT TLSPEANTTRVLFATWWLF  
VILLSAFYTANLTAFLT LSKFTLDIENPIDLYKKNYRWVATEGGAVQNTIKSPEEDLYLSR  
MVSNGRARFRTIKFNEDFLPSVTGGAVLVKEQDAIDNLMYNDYLRKTKEGVAETERCTY  
VVAPNAFMRRRAFAYPRNSTLKILFDTVLSHLIQSGIVKFLERMDLPSTKICPLDLQSKDR  
QLRNSDLMMTYLIMVTGLAAAIAIFIGEITYKRYLNK KLLNGISTKPNKNNKKQRNKVTR  
THYDDSRPPPYDSLFGKTKYKFNDSEKRIVNGREYYIVHNAVGDTRLIPVRTPSAFLYH-

>HmeIIIR85a

MFKVILALS VFKLCLCLNESSPLYTEIFTYHNETYLRADFAFQVVNKIFNAFEQWFFTITFC  
EFTYFENRILKYTENYGHGYPV MLLNGCQDPNATEVKPKLDTHGNTAYLVTSKSLTIESSE  
YALQALIRTGVFKPRSS IIFV VNT PVEINSYFN YDMFNHFQLLWSRSITNSIIMVWTDKLRM  
YLYNPFYSKIKDVT DVRDIAHILAKQHEDLNGHEIRLSVFRKIFISDETGPVYCNSKLASTV  
ISILNATCKPLAPRDGNTVGDMLPNGTATGVTADLLDGYTDMELNSRILKNSYYGYIDTTY  
PLVQDEL CFLIKKSMSQSTFM TTI RLISIDMLFAFIFIVIALIGV SLLIRK VETRIWEIKDRRSQ  
SETVLDLIKCFIRQTVDIKY PGPLFRAVALLIMIYSLIVDCAIDGIITSAIAYPRYKEDINTLDE  
ILANNLTLGVHNRHMRIFKRSINPEHLDQIMERTEAINDQKIKQVIEERQYQYAVLLKKS D  
AQYISRKPSNMRNGRPLYHTAGDCPVPCS VVYGLRYGSPYLPRLNYLLNHLNQG GILRH  
WSVSDEY TLLQTKNKVSYSEN NKEKKPLNMKNVREVII VWSFGLFISTTVFIELITNFVNK  
IPVI-

>HmeIIIR87a

MRFRCLFKYLLFIKLALIASSEN PFLKDAENVEQITNSAECVLR LSGKYFVEKKALSGSIIIV  
SVNSKASAAENFLLRTMHGGKNYSIMVKNAFRQHANASHFPEKAKNYLMILKKKFELLN  
HLIQLSGLPSWNPLAKAIIYYRLKTGEKGEDVSKAFINELRHYKLLKSIAFIYSPVTDEVTS  
YSWTPYDSKNCAGKCKHVYVLDVCKNNNIRQLEVQRDMFPLDLKGCPLITYAIISEPYV  
MPPERKVANTMWNDA YEFQKGGEINLVKIISQFTNMSLIIRMSEKVENWGEIYPNGTAGG  
GYLLMNDSVDLLIGNIEVTRKTRKLFHPTISY TQDEMTWCVPKARQAVTWDNLIIIFQW  
TTWLATFSSVLVMGLIFHYLHYQENRDTKWPTYSILMTLCMLLGWA AKFDAKSSQFRIL  
MFGWLCFALNMGITYESFLRSFLMHP RFDKQISSQSELIDSGIPLGGRQIYRAYFETNNASS  
FYLYRKYNSTTFAEGIRRAALS RNFVVASRKA EYMDQELGKGAGLIYCFPESDNLKYK  
GVVLLFRKWFPMLARFN NIIRSVSENGLIDKWNEELFIHRISDGTGTIMPLSIQHLLGAFM  
LIGILYGVSVAVFLFEIFLGF FFKNNRIQDVNVRTPSL-

>HmeIIIR93a

MKLWMVACVIWSS LQYGQAEDFPSLITANASIAVVLD RQFLGDEYQTTLDEIKDYIKELA



RVELKHGGVNVHYFSWTAISLKKGYLAVFSVASCEGTWSLFFQKTEEEQLLLFALTEVDCP  
RLPTDSAITVTYAAVQGELPQLFLDLRTQKGMNWKSAILHDDTLNRDMISRIVESLTTQI  
DDDDVPSISVTVFKMKHEVNEYLRKKEVNRVLSKLPVKYIGEKFAIVTTAVMATIAEAAR  
ELLSHTQAQWLYVISDTSGRGNFSLINDLYEGENVAYIYNVTENDEGCKVCLICYAKE  
MMSAFISELDSAVQEEFDVAAQVSDEEWEAIRPTKLQRRDTLLKHMQQYIMVKSECGNC  
SWWRALAADTWGATYREKTYETKRNVTISIVIEHVVELLNVGWWRPIDGIKFEDVLFPHIVH  
GFRGKELPIITYHNPPWTYLQSNESGSIVSYRGLLFDIVEQLAKNKNFTIRIVLPGNIKQNH  
TNDTATDMSHSVSSMLTLSAIAKGRAALAAAFTVLSDHNPGINYTIPISTQTYSFMIARPR  
ELSRALLFLLPFTTDTWLCLGFVILMGPTLYIIHRLSPYYDAMEITREGGLSTIHNCLWYIY  
GALLQQGMYLPRADSGRLVVGTTWVIVLVVVTYSGNLVAFLTFPKLEIPVTTISELLES  
KTYTWSISKGSFLEMQLKSSDEPKYKALVKGAEVTGGINVEGSLVSGSEILNRVRNQRH  
ALIDWRLRLSYLMRAETVKTDTCDFALSAAEFMDEQIAMIVPAGSPYLPVINKELNRMHK  
AGLITKWSAYLPKRDRCWKTSTVEEVNHTVNLSDMQGSFFVLFLGVFSATTVLLLEWI  
FKRRQKKVDQIIKPYTD-

>HmeIIIR143a

MWSMYNLQSLERTRKILYTYVVKSLNANMLLRNSYKELLIFLMTARIIAGINKGIFQVEE  
NNDLQFMKCFTHIPEVYQISYKRTIVYEDENTLEDNIINVMFKLIENQMPFMKINTREEL  
LKLSKVYDGTMLIVSYFNCEETLKVDLSIFYLNFKYIFVIDSYIDEVCIQALEHTLSPVLY  
YDITFLTRAQNDTYNLATLIPEIDEHSCRVSSENAPMKVINTCHNGTLEKTKITDIFPIKTPRN  
LKKCNFNVGMATLFPYSVLDNKESYKDLDLVNDKIYGADIEYMKIFANIFNATLKMHYIF  
REEENPYLDFNFKYLFNGTLDACAGGLYRIYGDVVAYSIGYSGQSVIWTYTVRQIRSW  
QSLIVKITGLYIFFIFYIYTALWKLISKYDNRSDSIQDTLIYAWGALMGTSGLQDARCLKQK  
ILNVVYLIMCIHLSSYIGTQLYYYLTIEQPPQTFKTVDELALSDRTPYLRSLTKYFIDDKKHK  
AFANTSLECDNFKDCERAMLKHKGSTIIIDGQLPPLQAATSVNDEARVLGVPQVILFVYHE  
MLMRTDHMLVTKFDKITGRLFEAGICHKLYIEAIGITVVDKAKIANENILSNSYSCLVGCQI  
TLRESAGAFYIWIIGCGLSCCVFVIEILLKRKLKSKTT-

>iGluR1

LICNQFARGVFAMLGAVTPESFDTLHSYTNFTQMPFVTPWFPEKVIPPSSGLIDHAVSMRPD  
YHKAIVDTILYYGWKEIIMYDSDHGLLRLLQQLYQTMQPGRTAFRIALVKRINNASDAIEF  
LLALEQYDRWGNKRIVLDCNAKNAKSILVEHVRKVQLGRRTYHYMLSGLVMDHDHWENE  
VTEYGAVNITGFRIVDHSRKIVRDFMDGLRRMDPRFKGTISAETALMYDGVQVLM DALG  
RLWRKKPDAFRSALRRAAGQANSTKVIDCNPGKSWVVPFEHGDKISRLIKKTDIEGLTGNL  
SFNEEGHRHNFTLHV VEMTVQSAMLKVATWSDAHGLQVATPRYVQLRSPASYDTNKTYI  
VTSFLEPYLMQKPIEFGQKEELFGFCKDLMDVIAKKMGIKYKLKLSNDANYASDALPDI  
HSGVVGEIVRKEADIAIAPFAVTPERERLVDFSEPFLLDTPAIYTRTPRQLSDTFSFLRPLSK  
EIWLCVLFSSFAVSIVLFLVSRFSPHEWKSVSISDTQLDHTMSSTSEIILHNEFSIWNFSWFSL  
GSFMQQGSDVVPRLSGRIVGTVWWFFALILVCSYTANLAAYLIVERIAEPALSTVSYSPNI  
AHTESSLNFRNNFVKDPVLNEEAISAYSDDGEACGPSRVCRYKHVNFAFATAKGSPLREA  
INLAIVNLKKEDFITKLWRKWATYNKKPDCEMIKDEETTTI-

>iGluR2

MSRLLLKWLAATLCLLRVHGDRTLGAIFDDGTFLLEAAFNVAIAAASEDQENPFVANVIKT  
SPSDITEAENAMCTLLESNVFGVFGPTKKGSLQHIQSIADYLEIPHIITDPVETQNRNWSVIN  
LPHHLAYSQLFADLIELKGWTDFTIIEGAELLPPFDSILSMQDLDTGQKILIKIVQLPDGD  
DFRSQKFIKKSGSVNYIINCRRETLPLVLEQAQQVGIMSDEHSYLIMNPDFQTIDIDPFKH

GGSSITGIRMFDPSPLESIQNFITSLNEKVAELSENEIENAIENGLTLDLALVYDAVTLFVSTL  
NAMSLEEGSNVTCDDAESWGFSSIVNYARTMEVDGLTGIIKFDEDGFRSEIEIDVLEIMSY  
GLDKVGTWTLEDGFVETKDNVSPAEEQEGSESMKGGKHFVVLTAALSAPYGMLKESLKKLEG  
NDRYEGFGIELIDELAKINEFNFTFDIQEDGVYGSYDKKTGKWNGMMEKIMDGRADFAIT  
DLTITAARQKAVDFTSPFMNLGITILYKPTKEPPDLFSFISPFSGVWGWLAGAFVGVSC  
LFILGRLAPEEWQNPYPICIEPETLDNQFTLANFSWFVLGSLVLTQGSEIPIAVSTRMAGSM  
WWFFTLIMVSSYTANLAAFLTVESKFYAIKSVNDLASNPYGMTYGAKKGGATFSFFKESD  
NLLYQKMYHYMEDHPQLTATNDQGLDRVKSDSENYAFLMESTSIEYMVERNCDVAQV  
GGLLDSKGYGIAMKKNSPYRQPMSESLQLQEEGKLTRMKDKWWKEKRGGGACADDD  
AGGGEAQPLVLANVGGVFIVLAAGSGMAVCAVEMVFDVWMISRKMKVSFRELKAE  
LKFILSFGDTKPVHRHRESTGSGSGGSKDDGEKNADAESPDDDDRADPSPTPRSERSGHSH  
HTLHSRRQSNVAVQMAKMRKYSLRSAM-

>iGluR3

IHPGNVSCDKDTPSLHGKAIYDNINTIQAHGLTGPLEFKQGIRKNFHLQLMRLTGGEKGG  
MVVSGTWSPAEGLAITDPAAYTRDPPPNVTLTVVTVEEKPYVMVKEGWNLQGNARFEGF  
CIDLLARVAARAGFHRYRLVDPNMYGARDPDTGHWNIVRELMDRKADIAVASMTINY  
AREAVIDFTKPFMNLGIGILFKVPTSQPTLRFSLNPLAIEIWLYVLAAYILVSTLTFVMARFS  
PYEWSTSTHVCGHETKLLTNQFSVCNSFWFITGTFLRQGSGLNPKATSTRIVGGIWWFFTL  
IILSSYTANLAAFLTVERTVLPQSAADLAAQHIIHYGTLNGGSTMSFFRDSNIDIYQKMWE  
HMSSASPPALVSSYEELVRRVLAGNYAFLMESTMLDHRVQRDCNLTQIGLLDSKGYGIA  
TWKGGSPWRDKISLAILELQEKGVILYDKWWKNTGDVCNRDGGKDSKANPLGVQNIIGV  
FVTLCLGLALAIIVVAILEFCWNTKKNASQGRQSLCSEMGQELRTAMRGGSSSRTVLRPGC  
SRCSPATHVPPATSRVYQHSRSS-

>iGluR4

MRGANAIFLILFFGHLSALPDTIRIGGLFHPPEDEKQEVAFRYAVERVNADRAVLPRAKLLAQ  
VETISPDQSFHASKRVCHLLRSGVAAIFGPQSAPAAAHVQSICDTMELPHLETRWDYRTRR  
ESCLVNLPHPAALSRAYVDLVRAWGWRSTIVYENS DGLVRLQELLKAHGPELPAVAVR  
QLPDSHDYRPLLKQIKNSAESHIVLDCTTERIRDVLQQAQQIGMMSDYHSYLITSLDLHSV  
DLEEFKYGGTNITALRLLDPERADVQRVVRDWVYDEARKGRKLQLGHTTAKENMTFIKT  
ETALMYDAVHLFAKALHDLDTSQQIDVRPLSCEAEDTWPBGYSLINYMKIVEMKGLTGVI  
KFDHQGFRSDFTLDIIELTRDGLQKAGTWNSSSEGVNYTRSYGENQKQIVEILQNKTIVTTI  
LSSPYCMRREASEKLTGNAQFEGYAIIDLIHEISKILGFNYTFKLAPDGRYGSYNRETKEWD  
GMIRELLEQRADLAIADLTITYDREQVVDFTMPFMNLGISVLYRKPIKQPPNLSFLSPLSL  
DVWIYMATAYLGVSVLLFILARFSPYEWDSRPNCLDEPPVLENQFTLLNSLWFTIGSLMQQ  
GSDIAPKAVSTRMVAGMWWFFTLMISSYTANLAAFLTVERMDSPIESAEDLAKQTKIKYG  
ALKGGSTAAFFRDSNFSTYQRMWSFMESARPSVFATSNKEGEERVVRGKAYAYLMESTT  
IEYVVERNCDLTQVGGMLDSKGYGIAMPPNSPYRTAISGAVLKLQEEGKLHILKTKWWKE  
KRGGGSCRDETSKSSSTANELGLANVGGVFVLMGGMGVACVIAVCEFWKSRKVAVDE  
RASLCSEMASELRSALKCPGGGAGGGGGGPGGARDGAGSPYLHYGFSTKSQLH-

>iGluR5

MWSYHVFLAVVYCGGQLVTADIDRRRFSNPTYYNVGGVLSSNESIAFFKDTISNLNFKDQ  
YVPRGVTYHDYSMLMDPNPIKTALNVCKDLIAHRVYAVVSHPLTGDLSPAASVYTSIFY  
HIPVIGISSRDSAFSDKNIHVSFLRTVPPYSHQADVVDVLKHFNYMKVIFIHSSD TDGRAI  
LGRFQTTQSVDVDRKVVVEQVIEFEPGLDSFSDRLMDVKGAQARVFLMYASKTDAEI

IFRDATFLNMTTVGYVWMVTEQALDAANAPEGLLGLRLVNATNEHAHIQDSIYVLASAIR  
DMNTSEEIHAPPSDCDNSGSIWTTGRLLFDYVRKQRLENGATGHVAFDDHGDRVHAEYD  
MVNVRAQGEHVAVGKYFYSKETQKMRLELKEQEIIWMGRSTSKPEGFMIPHTLKVLTIEE  
KPFVYSRRIDDGSECTPEEIPCPHYNASEDTDQLYCKGFCMDLLKHLKAINFTYSLALSP  
DGQFGNYIIRNFSQPQAKKEWTGLIGELVYERADMIVAPLTINPERAEFIEFSKPFKYQGITI  
LEKKPSRSSTLVSFLQPFSNTLWILVMVSVHVVALVLYLLDRFSPFGRFKLANIDGTEEDAL  
NLSSAIWFAWGVLLNSGIGEGTPRSFSARVLGMVWAGFAMIIVASYTANLAAFLVLERPKT  
KLTGINDARLRNTMENLTCATVKGSVDMYFRRQVELSNMYRTMEANNYDNAEQAIED  
VKNGLMAFIWDSRLEFEAAQDCELVTAGELFGRSGYGVGLQKGSWADLVTLAILDF  
HESGIMESLDNLWILRNNMLNCEENEKTPNTLGLKNMAGVFILVLAGIIGGIVLIVIEVVYK  
RHQIRKQKRMEIARHAADRWRGAVEKRKTLRAAILPSQRRAKSNGVKEAGSISLAVERGA  
RRRDEPRVPRYLPAYTPDVSHLVV-

>iGluR6

MHVLVPLLLVCVSAQEGPIGGIFYKDSSEDMKAALEVSAKSFNFTASIKEVSTRGEV  
LEISKYVCQLAEEGVIGIIDGTGGRSSEIIQGLCDALELPHISIEHNDLYSDDWFVLNMYPSP  
TAYNMVLQKLILHKEWKNFTLLYTKGHSLIRVSELLQMGNDTLVVSRLSGSDYRDVLI  
DAKHNGYKNFVVDSPSRYLEQVLLHAQQVGMMAEEHSYIFVSPDLFTLDMSRFKYGGV  
NMTGFRVLVELQDKDNEKLWNFTSTLNLETGKTFKPEQLKTQVLLIHDAVEVFAAAFKKV  
KVQPEALSCDNYQAWSFGSTLLNFMKTNKVEGLTRSLIFDGVGQRTDITFNILELTSAGNQ  
SIGNWTNNELKINRPLVADAEITQESALRNKSLRVLISLAPPYGYMRKSDKKLEGNDQYEG  
FTIDLIDKLSEILGFSYEFAVEDDYGKTESGEWTGMALQLREERADLAICDLTITAVRQSGI  
DFSTPFMTLGIGILYKEPSKQPPEMFSFMAVFSKEVWYYMMLIQLALGATMIFVGRISNKE  
WQNPVPCIESPEELNNQFSFANSVWLIIGSVMQQGSEIPIAIGPRMITSVWWFFTMVMVA  
SYVGTVAFLTVEKNVLPFETVQELYESKSITYGAKEKGSTKQFFENSTNPIYQAMFKMKK  
AHNWLAKENDIGVYWAETQNYAFFMESTSLEYKERHCDLLQVGGLLDSKSYGIGMKK  
KSPYKKYIDDALLKLENKEIEKLRNIWWKEKRGGGKCGEKRDADQKQLGMKNMLGAF  
VVLGVGCLIGLFIISIIDLWGVFKRSVKYSTTFKYELIEELKFALKFSGHIKPVKRPQKAID  
GSFEALAKAEGKDDIRSLHSIRSCDTHRTHSHSHSSRHSSRSLSVAFARRSYS-

>iGluR7

MCWYLLVLLLCVQKCTPQFVYTEMTEISYQIVGIFEKDATIQMAAFNDSLNVHVHVEVTI  
RPATLQPRRTDSYSVWRELCNNAIQAVAVFGPQNPTDGAIRDQCAIANIPHIQATWQSMID  
PDLELNEETTAQEEGEDEESEIPFKKISINFYPDSEEIALAYGKLLQYYKWGGFAALYEDNF  
GLLRVQKILAEVSLQSQIFMYKLDPKGDNRRIFKALRKFQVSRFLLDCHSDHILRYLGEAD  
NAKLVSSEYQHFVLVSMDSSTVAESLIKMPNSITWLSITQYDKLKDGGHYLATRVGNWRSN  
EESPSVVQFKLDSLIMDDVASHLVKALDVKDIAQPPVFSCTGDEEPWAHGAAYQQKILKT  
QSYGVTGNVEFDQRGRRINYVLYINEIHIRDRQTIGRWESATGMINETKRLDSSAANQQSS  
KEFVVISRRAKPYFSFKEKCEKTECKDDDRFEGFSVDLVDNIFRILREEKYNITYRFIHDY  
DMEYGKVDPTHTWTGLVGYLLDKKADLAVCDLTITEERKKVVDVSVPFMSLGSILYTO  
DRKVQPGMFSFLNPYTFEVMHTATAYCVVSIVLFCARISPADWENPEPCEKDPEELNI  
WTFKNCAWLTMGSIMTQGCILPKAIGTRWVCGMWWFFAVIVCQTYIAQLSASMTSALE  
NEPINSVDDLAKQTKIRYGAIVGGSTLEFFKASKDKTYRHMYETMAANPAVLVTSNDEGE  
ERVLKSKNTYAFFMESSTIEYKLRNCKLKKVGGELDSKDYGIAMPANSPFRTDINRAILR  
LKELTTLKIKNKWWHEKYGAQKCEPTVDENDIEGDLEMENLMGAFVVLVGLVFLCFI  
TAIEFMNEVRNIVVREQVTHKEVFIKELKASLNFFQLQKPVLRNPSRAPSIASSDSDERREN

QAKAIENFMNLEKAV-

>iGluR8

RTSPAPPPPRAPSSITAALVVPKAFGTRDYTKAEKAALSKLPRKLLKFSHVRLNITLSTQG  
LTPSPMSILDSLCKEFLAVNVSAIYLMNHEQYGRSTASAQYFLQLAGYLGIPVIAWNADN  
SGLEKRASHASRLQLAPSIEHQTSAMLSILERYKWHQFSVVTSIAIGHDDFIQAVRERV  
ALQDRFKFTILNAIVVKRSSDLNELVTSEARVMMLYATREEAAEILSAAGDLHLTGENFVWI  
VTQSVLGSMPQPNKFPVGMGLGVHFDTSSSSLIAEIATAVKVFAYGVESYVSEPENIRYPLGT  
RLSCSGAGAGEARWSTGERFYRHLRNVSVEGEAGRPSIEFTPDGELKAAELKIMNLRPAL  
GEQLVWEEIGTWNZYPRERLIKDIVWPGGLHTPPQGVPEKFMTRITFLEPPYINLAPPDP  
VSGRCSLDRGVICRVAPEVEVAGLEAGAAHGNSSLYQCCSGFCIDLLQQLAEQLGFTYELV  
RVEDGRWGTLHHGKWNGLIADLVNKKTDMVLTSLIINSREAVVDFSVPFMETGVAVVVA  
KRTGIISPTAFLEPFDASWMLVGAVAIQAATFSIFFFEWLSPSGFCSTGNNSKRV PQNRFS  
LCRTYWIWVAVLFQASVHVDSRPGFTARFMTNMWAMFAVVFLAIYTANLAAFMITREEY  
HELGLDDPRIARPLTQRPLKFGTVPWSHTDATLAKYFTEPHAYMARYNRSTVSAGVTC  
VLTGELDAFIYDGTVLDYLVSQDEDCRLLTVGAWYAMSGYGLAFTRNSKYVSMFNKRL  
DLRANGDLERLRRYWMTGTCKPNKQEHKSSDPLALEQFLSAFLLMAGILLAALLLLE  
HVYFRYLRSHLAASSAGSCCALVSLSMGQSLTFHGAVVEAAARGFGERSHCRSAVCAAQ  
VWRARHERDMAVARARQLA-

>IR1

MHPWLILTNIADNCTDYIQSFQQLNLSVDADIASVYNGGDNYTLTDVYNFGKIQGN  
NLEVNHLGSRPETGLDIKLGKYYNRWNFQNLTLRAISVIVDQPEMFYPEMLSEMTY  
TAGVAAMTKITSQMLNLTKEQHNFRFNYSIAGRWIGSPKRNSTLAVTNALFWEEQDLSST  
CARIFPKWLDWVDIIHPPTNLQTKFYILPETGVGQYENRFLTPMSHG VWGCAFIAGIAC  
TLVLTGAAWMESRPKGLYAFFSVFAAVCQQGYEDGVQLLETYSQGRRLTLLVIGLTSML  
LYNYTSSVVSWLLNAAAPSIGNLDGLINSDFELIFEDIGYTRGWLANPGFYYSGFNNV  
KEDELDRDKKVTAKRTVPVLQTVNTGVDLLRTGKYAFHTEPYTAAQVISKTYEDEELCNL  
GALQMMLPAHVYIMAQKRSPYKEFFDWSLLRLLERGHVKAIRARFAGTMPACSGARPRA  
LALGQAAPAFMLLLLCVLLSWIILAFEVLWSRVQLKKRGP-

>IR1.2

MAEDVLYFASQNMWLDSSHKWLIDDDKAEIEGYNDTEIDNVLFEDRNTTLIDILSNLNS  
VDADIVVAEKGNSSYNLYEVYNYGKIQQGNLIVNEIGVWNHENGFNLNINLNGYKYR  
WDFQNI SMRMILVVQRASKNFDLES LTGPEPVPGVAMITQTPTDILYIVAKIHNIRYVSTITD  
RWIGSYEKNSKVVSTSLYFREQDVSPVIRGLSTVYERIDVINPPLTSIETRYYYRIPTMGPG  
KFENQFLRPLSTTAWWSVIGVSTLCAGLLLLSALLEQRPSSVQYAVFSVVASLCQQFFQDID  
DSGTKRISTARKVTILVTGLSCVLLYNYTSSVVSWLLNGPPPSINSLKELLESPLIYEDI  
GYTRSWLQSPSYFNKRNAPIEDELQKKVFNKKKNAPLLEPLVQGIKMOVQKGGYAYHT  
EVNSANALISRTFSQSELCELGSLQSMKTLHPCLQKHSPYKEFMTWSLMRLSEQGIVSC  
IQIRSSFEVKCEGSSPRALALGGAAPAFILLGGYM-

>IR2

MAYWYYLLNAVMTTMIGCSPMKNRSMIIRSACLSGSILFLAVYQGHTSRVYTTLKHFERI  
STLDDLYAFGAILYTPGMRQFTRQLQRPNGKLEEDFFNRSRLILNERIGAGITLIPRATTL  
DRKSDAEMKILEHFS DREGRPLIDIVDECFMNYFLSYITRSGFPFFEEIQIFTQRLLLEAGLPT  
KYYKWTQQMLNIPTSLPETRSEPRPFSKIKLKDQRVAFFVLFVGSALSIIVFAVEIFKGGPVE  
F-

>IR7d.1

SVIVKLG RFLPARRAAVPQMIIFGEDASEISSTIRWTVRAKYDSNGKFIIICAHLEQECDELK  
IFQTLQSLYMFNAVVLKTSNKTKESLAYSDFLSEGGKCKNSIPYKVNLTDCFNDCFNKLN  
YPERLSNFRKCP LIMSTIEQPPFMYLHNLT SKPTGIDG DIMRLVADMLNATLHLKPPYDGA  
DSGHFANNWTGSLGDIYNNHSHASVCSAPITSGKYGNFQISFTYYSMDIVWATRLPAQQ  
APWQKLLHPLNIYIRIILLLMFICIIIFMN-

>IR7d.2

LTANMAISELNHFFDTNVTAGSQLGDMAAKVAIQNFDLRHATMLFFNSTLCYGVVEVFLQF  
YHYNIVINRAKVLARKTTRQFVLFASDTADIELLLDSIISFEMDNTGKFIIICESSTPKECDEQ  
DIMVLCWNYRIVNMVFIRQEETEAVGFTYYPVADGICNNLKPIKLD SHNQYTKTTYGEIFR  
KKFRNLNFCPII ASTFIQPPYMYIKNGIPTGIDGDLLRMLIHGMNASLKMMTPSRGTGWGF  
REKNGTWMGSLADVDDL ANFSMTSAAITL TRFTDFQISSGYSTSKV VVWVSESAQVQNV  
ALKLLHP-

>IR7d.3

TLDLEPPFESIEEAVTKVDGYGGVEVVVDYKDTPLERNYKVIPMNELKNYIRRIVEGENF  
ILATDIALVKLLEPYVQILKKRISATGACFYMRPGWPAAKDVDDVIFSLVEAGFIENLLSDN  
NNHRWIVNRMNADDVLQPKSLSVEKLSTCFYGLGIMWLICFIILLIEIVHHNKH-

>IR8a

MSFHYLFLIFLINLGCVISELSLRFVFIIESQEQLTHEISKALKLAESVRTDVKLDDAVVV  
LDRETEDES YRMLCSSLSKGVSMIIDL SWTPWEMVEDLAAETGVPVVRTLLGSQQLVKAL  
DEYLESRNATDAAIILESESDVDRTLYELLGASNIRVWVHAGLTRDSAKALKTMRPEPSFY  
VIVGENAFIMDTYRRAVKEKLVRRDYRWNLVLT DYSTLELSQLVLPVTLQADPGECCKL  
MRREDCSCPND FQRKQYILNALIQYIAEVYSKLD RDLPLVTSSISCEEPEAIMNSTRDRLYR  
QFAEDAEISNETLFYWDMDRSGFLRSR FILSTYKPTAGQQT IATWSADEEYKLLPGVELE  
PLKMFFRIGTAPAVPWTLMKLDPETGEQMYDDD GQPLYEGYCIDLIARLSETMSFDYEIVS  
PKSGGFGKKL PNGTWDGVVGDLMRGETDIAISALTMTAEREEVIDFVAPYFEQTGILIVIR  
KPIRKTSLKFMTVLRTEVWLSIVAALVLTGFMIWLLDKHSPYSARNNPHAYPYPCREFTL  
KESFWFALTSFTPQGGGEAPKALSGR TLVAAYWLFVVLMLATFTANLAAFLTVERMQTPV  
SSLEQLARQSRINYTVVEGSSVHQYFINMKFAEDTLYRVWKEITLNATSDQAQYRVWDYP  
IREQYGHILLAINASEPVPDAKTGFQVNEHTDADFAFIHDSAEIKYE VTRNCNLTEVGEV  
FAEQPYAIAVQQGSR LQEELSRALLELQKERFLEQLAGKYWNESARQACPD ADESEGITLE  
SLGGVFIATL FGLGLAMITLAWEVFY YKRKEKNKVQTLNTKPEKVAFESKSTLETKVAESV  
AKLKKRGKKGNLAKNVTFGDTFKPVAEKGVSYISVFPKDYRP-

>IR21a

MSFVHGYINDGGELVERKLLHASTDCQNYILFLTDIKASAKILGKQPKNKIIIVARSSQWAV  
QEFLASVVS RMFVNLLVIGQSFKEGD DANLESPYILYTHKLYTDGLGASQPVVLNSWNHG  
KFSRNVNLFPPKMTEGYAGHRFLVAAANQPPYVFRRIKADLDGGNPRVVDGVEIRLVK  
LLAERNNFSIEIIEPLELHLGSGDAVAKEITSGRADIGIAGMYLTTDRIRDLDVSQAHSQDCA  
VFITLMSTALPRYRAILGPFHWHVWVALTFTYLFGMFPLAFSDKHTLRHLLHNSGEIENMF  
WYVFGTFTNCFTFLGKNSWSKTDKITRLLIGWYWIFTIIITSCYTGSIIAFVTLVPVPETVD  
TIKQLLAGFYRVGTLDRGGWEKWFLNSSDPQTKLLNKLEFV PNVEAGIRNTTKAFFWP  
YAFLGSKAELEYIVQANFTATKSKRAALHISNECFAPGITIGFPNNSVYSEKMSLDISRM IQ  
SGIIDKIADEVRFEMQRSVTGKLLAAGSGTIKIPSAEEKGLTLEDTQGMFLLL GAGFIIAATA  
LVSEWMGGFTRRCRFQRKVDTPISVNSREHLIPTPKTDIGSEIKIIGD TESRLHFDSRPSTAA

SRDTLEGQIINVTE DNIDVHNSFNVD RFD SRRSSSLDLDREVREIFEKDQKRRRIVSQDMES  
VDEHGPTVSRVAFGDPIKHEK-

>IR25a

MSTVTVLLLFNLVHIAFGQTTQ NINVLLINEESNALAEKAFEVAKEYVRRNPSLGLAVDPV  
IVVGNRTDAKSFL ENVCRKYNDMLLAKKTPHVVLDFMTMTGVGSETIKSFTEALGLPTISGS  
FGQVGD LRQWRTLNANQTRFLLQVMPPADILPEAIRAVVTKQDITNAAIIFDEFFVMDHK  
YKSL LQNIPTRHVITPVKSFEANEIKTQLES LRNLDIVNFFIVGSLRTIKNVLDAADKNQYF  
GRKTAWFALSLEKGDISCGCKNATIVHMRPTPDANSRDLGKIKTTYSMNGEPEITSAFYF  
DL SLRTFLSIKSLLDSGKWPNDMKYITCDDYDGKNTPNRTL DLKTA FQEIKETPTYAPFFIP  
QDDPMNGRSYMEFSTDLLAITVKDGASISSHSLGSKAGLSSNLTLTDPNNMNSYSAQLV  
YRIVTVEQKPFIRDDKAPKGFKG YCIDLIEEIRQIVKFDYEIILAPDGNFGTMDENGNWNG  
I IKELVDK KADIGLASLSVMAERENVVDFTVPY YDLVGITIMMKLPRTPTSLFKFLT VLEND  
VWLSILAAYFFTSFLMWVFDK WSPYSYQNNREKYKEDEEKREFTLKECLWFCMTSLTPQ  
GGGEAPKNLSGRLLAATWWLFGFIIIASYTANLAAFLT VSRLDTPIESLDDL SKQYKIQYAP  
LNGSAAMTYFQRMANIEEK FYEIWKEMSLNDSLKEVERAKLAVWDYPVSDKY SKMWQ  
AMEEAVLPNTIEEAIQRVRDSKSSSEGFALWGDATDVKYHVM TSCDLQSVGDEFSRKP YAI  
AVQQGSPLKDQFNAILQLLNKRKLEKLKEIWWNNNPETMKCEKQDDQSDGISIQNIGGV  
FIVIFMGIGLACVTLGVEYWWYKWRKRPVVG DVTQVEPAKTTRNNVDKQGE GFTFRGR  
NLGLTFKPKF-

>IR41a

MLVSTPALVPLEILLNTIINQYLQSAYCITV FSETPFTFILPTSFISLIPNETNLVEQIFNVSETG  
CSDYIVRMRDPQIFMEAFERVVHIANVRRSDR KIIFLPYDEEYNEENDVNLP SLVFAMKGS  
KYLANMLMIVNHASVNQDCKIFNLVTHQFVGRSEEATHLPKYLDSWDSCTQKFENEANL  
FP HDLTNLYGKVVRVACFTYKPYALLDIDPAIEPLGRDGV EIRIVDEL CRWINCTVEIVKED  
VDQWGEIYANESGGIGVIGSVVEDRADIATALYSWYEEYRVMDFSVAGVRTAITCIA PPR  
LLSSWEMPLMPFTWYMWLAVVFTYFYASTGLLTAQGCSTTTY PFFNVFGMMIGQSQYES  
RASWRIRGVTGWLLIAGLILSCAYGAGLASTFTVPRYEPSIDTVQDIVDREMEWGATHDA  
WIFSLTLSTEPLVKQLVSQFRIHSFDELKRKSYTRSMAYSIEKLPAGNFAIGEYITQEAVLDM  
MLMLEDFYEQCVMMRKSSPYTEKVSQLVGRLHQSGLLLAWETQVALKHLNYKVQVE  
VRLSRSKNDVGTTKPLNLDNVVGIFIVY AIGLTISFAIFLGEIYVHQ RKKKNEVLHID-

>IR60a

KMKARYNFIDGYRGERENVGEWNGGLK KKLASKSGHLLLGGIFPDFDVHEDFETSVTYLA  
DAYTWVVPRAHKSAAWVALVIIFKSLVWYSVIAGFFLCGITWKIIAELSEDS DYNRSFRHC  
FLNTWITVLGFVSYLHPVKESLRVFFVFLNIY CMLFSTAYQTKLFEVL TNPSY EYQIQTVEE  
LVESGLKFGGFEELHDLFYNSTDPFDYRIGDQWTDITNITEAMIDVAVHRNFSL LCSRLELA  
HISGITPELSDSVGNKYKYTFTDNVFSVPIETIALRGFPFMMEFSTTITIFKQSG LNEGLRQH  
FAHFNERRRARQLRALLKEKSDVNPLSSEHLQGGFLALALGYVSGTLALIVEVILNCNYV  
QNKFENFKRRVNPLS-

>IR64a

INRESTSTKLLIFITFMYAVTLYQYYNATIVSS LLEAPRNIRTLKDLLSDLKAGAHDIVYN  
YDYFKRTTDPVAIELYHKKVVTATQHNYFPAEK CMDLVRGGYAIHIDTSVAFLIKATFNE  
REICDTTLVQMYPLQRMGVVMRKNTQYREHVANAIRRFSEAGLPQRLRSVDDEPMPECA  
HTPDSVFCVGIREFSTPLLVLALGMLLSVMLLLCEIILHRV VQRAGLRDFVH-

>IR68a

GMLLVVSLPRLPMGWSIRLLTGWYWLYCILLVVSYRASMTAILANPAPRVTIDTLKELVDS  
KVTCGGWGTQSKKFFEQSLDEYSQRIGDKFETIDDPMEAANKVAQGVYAYYDNSDFLKY  
ISVVRKNSFMDPKQNTANNTTEVTGRKDTQRNLHIMTDCVNVNIPISIGFHKNSPLKPLADI  
YMWRVVEVGLVEKWLNDAMYQIRTLETSEDEVKALMNLKKLYGAFIALAIGYLSAICLI  
GELIHWIIIVKRDPNFDKYALHLYLHKNKKH-

>IR75d

MGIGREQFVWRVGLPASAYRCVIMISSISSFSSSSSGGCLAASAAMDVYGVSHNGSFDGL  
VGRLQRNDAEVGLASIFIRPDRMQVADYISETCVLLCAFIRQPARSASVSNVFLAPFSAGV  
WAASAGVAAAAALLLVALRAVLQRTRQRDDLALFTLPETLTFALGTLCQQGFHTTPGVTS  
VRLVMFSTLLASLVFTAYS AKIVAILQTPSDALRTIDDLTRS-

>IR75p

MNGSVLVDSDLVLAERVGNHFKMVEMHRPGLNGSMITTPRGFYNGSFVDVRPHRELYRR  
RRNMMGHPITMSNVIQDSNTTREHLPKEDRLELQYDSITKACWSAAKIGFEMINATAKYIF  
SYRYGYKVDGQWSGMIADLYSNKADVGTNCVIFRDRFDVVTYTDLVAPMRMLFIFRQPP  
LAYVANVFYLPFSTRVWVTIAVCTAIATVTLYLASKVELVLTAKSTQQQLDGGICDALLT  
MSAVTQQGCYIEPRRAPGRMMVFLFTALMALYAAYSANIVVLLQAPSDSIRSLPQLANA  
KITLAANDVDYNHFVFNQSKPLHTSIRDRVFPENGKARLYSLADGVERIRKGLFALHSVA  
EPVYRQIEATFLESEKCDIATVDYLVTFDSFTVPRKGSPLYELIRVVKQIRESGIQSAIRKR  
FLVSKPHCTTKMSSFSSVGLMDMRPVLILMLYGVAVSVTIVIGEIAVYKLMNRYKRSSKVQ  
LIKVMK-

>IR75p.1

EADLGTLTIFTQERMMAVDYIAMVGSTAVRFVREPPLSYISNIFALPFGAVWLAIFICVLG  
CSIFLYIASKWEASMGMHPLQLDGSWADVLILMIGAVLQQGCTLEPRYAAGRCVTLILFLA  
LTILYAAYSANIVVLLRAPSSSVRSLPDLNLSPLKLGASDFEYNRYFFKKNLNDPIRKSIEYKK  
IAPKGGKANYYSMKEGVERIRKGLFAFHMELNPGYRLIQETYQEDEKCDLVEIDYINEIDP  
WVPGQKRSPFKDLFKINFLKIRESGVQANIHQRLTVPRPRCSGHVSTFSSVGITDMYPAML  
MTLYGMLLAPAVLLMEIMYHRLMIARQQKRGTSYDHIHPRH-

>IR75p.2

MRIILPAFVLVLTFLERKVFARDHTLVHFIKSYVENEKPTILIMNNLCWDKKIVVSLANEIS  
KIGSRSSSTSMGVDSRYYYHDLLYLLDLDCPGAEEIILATARNLFRSPYRWLVITAWSKNA  
NIAALWNSPVLADSDLVLAAGSGGVKLVELHKKSPNGTMISTLRGFYNGSLYDVRPHRE  
LFRRRRDVMGHTITMSNVIQDSNTTVYHLPREDGMEPQYDSISKICWMNVKLAQMLNA  
TPGYVFSYRWGYKVNGKWSGMIDDIHSGRAELGTNCVVS DIERLDVVAYTDRLAPFRVR  
FVFRQPPLPYVANIFSMPFSKNVWIAMSVCAVLSTATVYLA AKWEAKEGKGTQLDSIGD  
AMLLTFS AIGQQGCVM EPRRLSGRMMVFLFTALMALYAAYSANIVVLLQAPSDSIRSLP  
QLANAKITLAANDVDYNHFVFKLHKDPVREIVYKRIDPEKGGKHFYDLNEGVERIRQGLF  
AFHSIVEPVMRIEQTFLETEKCDLMEVDLNSYDTFVPRKESPLYELLRVVFQIRESGI  
QSALSKRLQVPKPHCTSKMSSFSSVGLMDMKPVLILMLYGVCLSVTIAAAEILVFKLSEHR  
KNTRLSQRSHHHKNTISASLFAVVLRSFYLVICDSILYFNKIKRMRLK-

>IR75q.2

LCSRLCYGQDSQNMQVMLSDVIEASGRPSSVIAKLCWTPSKIIQLHHTLTSKYIQFSAND  
VIKADNSEFYDEEQHIVFMADLDCPDIAITYFEKNSARNVFRAPFRWILFGNTSTNDDDIVP  
RAISNIDVLLDSEVLVLRVDDVYEMHFIYKISPNNTWQTEFYGTWNAKHRFQKSPRFEP  
TSLRRLDIDGYEISICYVLTNNESVNHLSDGLDDHIDTITKVNFPPTNHLLEDLFLNAKRKYIF

ANTWGYRVNGSWNGMTGYLVRGEVEVGGSPMFFTFERSIVDYIASPTPTRSKFVFQQPK  
LSYENNLFLLPFNNTTVWYSTIALVFIIYLVLLLVTKWWEWKKTQDLLETREKDAGVLRANV  
VDIIVLIFGAACQQGSPSELKGLGRVVMLVFLALMFLYTSYSANIVALLQSSSSHKTLED  
LLHSRIKFGVHDTVFNRYFSTATEPVRKAIYEKKVAPPGTTPRFMTMDEGVIQMRKGLFA  
FHMETGVGYKFGVGYFNEGEKCGLREIQYLQVIDPWLAVRKNTPFREMFKIGTKRIQEHG  
LQYRENRLMYEKRPKCTGGGSNFVSVSMVDCYPAVLILSYGAIVALFLLALEILAHKKENI  
LRKLNCRKDEM-N-

>IR76b

MAGIELIISSICNATFCDVPIYGGADKGEVLTPEVINFKSLMQDVNGKNLKVTTYNNTPLS  
WTEHHNGTVVGKGVAFVMEILRKKFNFTYDVIEPKRNYELGGRVTDDSIIGLLNSSKVD  
MAAAFMPTLIAYRKQVSFSIDLDEGVWVMMLKRPKESAAGSGLLAPFNDLVWYLVLA  
LTFGPCITFFTRVRTKLIADGEGVLPLKPSFWFVYSAFLKQGTNLSPEANTTRVLFVTWWL  
FMILLSAFYTANLTAFLTLKFTLAIENPRDLYQKNFRWVASAGSSVEHIVKTEGEDLYLS  
AMINNGKARFLSVLSDKDFLDPVKRGAVLVKEQTVVDHLMYNDYTSKKDVEESDKCTY  
VVAPNAFMKKQRAFAYPVGSKLKSFLDPVLTQIFQAGILDFLKRSDLPSTKICPLDLQSKD  
RKLNRNSDLIMTYLVMVAGSATAVAVFAAEIFIKRYSVKVNKTCKTKDRNKKSKIGKKSTR  
YDDSRPPPYDSLFGKNPRFNVETTRTKIINGREYYVFETGNGDRKLIPARAPSSFLYRSDK-

>IR87a

MVKDSFYPHANASHFPEKAKNYMLILEEKSELERNILQLNKLPTWNPLAKAIVFYQLKHN  
ETAETSIEFINELRDYKLFKTIVFIYDEYNDVVISYTWRPYSDTNCGGRCDSVYVLDRCT  
NNTIYEFEKQHDMPSPDMKGCPLVAYAVIAEPYVMPVPGKITNSSFDDAYEFAKGGGINLV  
KIISQFTNMSLITRTSDILENWGVVYQNGTATGAFEVLRNESADLVIGNVEVTRILRKWFHP  
TVNYLQDEMTEFLPKAGQAPTWDNLVIFQWTTWVATFFSLVIMGLVFHFVYREHTNAT  
KWPTNSLLMTFSMLLGGWASFEKSPTRILIFAWLFCFSINMGISYESFLRSFLMHPREFEQ  
ISTEADLIQSRPLGGREIYRSYFETNNASSFYLYREYNSTTFSEGVRRALERNFAVSSRR  
QAVYQDQKLGKGAPLIYCFPESNNMYKYGVAILTRRWFPMLERFNNIIRSVEENGLIDKW  
MNELLIHSVSSEEASTIMPLSIQNLGAFMFIGFMYGASIVIFIGEVVIGFIEKETTKKVMNK  
RLR-

>IR93a

NPDCKNIGMFCFCQELMDAFISALDAATQDEFDVAQVSDEEWEAIRPSKIQRNMLLKH  
MQQHLLAAKSRGNCSTWRALAADTWGATYRGLSDASDLSNVNTNGSSGVIDKIDLLKV  
GFWRPIDAVRFDDVLFPHIHHGFRGKELPIITFHNPPWTILERNESGAIVKYSGLIFDIVNQL  
AINKNFTLKIIILASVLKKELANDTLADTMHGMDAKLTIAAISKGGALAAASFTVLADPM  
PGINYTMPVSIQPYAFMIARPRESRALLFLLPFTTDTWLCLGLAVILMGPTLYIIHRMSPYY  
EAMEITRQGGLATIHNCLWYIYGALLQQGGMYLPRADSGRLVVGTTWWLVVLVVVTYS  
GNLVAFLTFPKQEVPTTVAELLENRALYTWSITKGSYMEMELKNSDEPKYIALLKGAEM  
VTTSVGMGGTMTSGSALLQRVRFHRHVIIDWKLRLSYLMRADRLESDNCFALSAAEFFD  
EKVAMIVPAGSPYLPVINKELDRMHKAGLITRWLEAYLPKKDRCWKASSMMQEVNHT  
VNLSDMQGSFFVLFMGFFSASTVLVLEFLYHRRKRRSELTVIKPYVE-

>HassIR93a

RPRELSRALLFLLPFTTDTWLCLGLAVILMGPTLYIIHRMSPYYEAMEITRQGGLATIHNCL  
WYIYGALLQQGGMYLPRADSGRLVVGTTWWLVVLVVVTYSGNLVAFLTFPKQEVPTT  
AELENRALYTWSITKGSYMEMELKNSDEPKYIALLKGAEMVTTSVGMGGTMTSGSALL  
QRVRFHRHVIIDWKLRLSYLMRADRLETDNCFALSAAEFFDEKVAMIVPAGSPYLPVINK



ELDRMHKAGLITRWLEAYLPKKDRCWKASSMMQEVN-

>HassIR75d

ALLLVALRAVLQRTRQRDDLALFTLPETLTFALGTLCCQQGFHTTPGVTSVRLVMFSTLLAS  
LFVFTAYS AKIVAILQTPSDALRTIDDLTRSPITIGVQDTTYKKVYFLESPDESTQQLYRRKIL  
PQGERAYHSVVDGIARVRTGLFAFQVESSGYDIIRQTFTEREKCSLKEIEAFKLPLVAVPM  
RKNSGYRELFATRLRWQREVGLMSRERR-

>HassIR87a

WGVVYQNGTATGAFEVLRNESADLVIGNVEVTRILRKWFHPTVNYLQDEMTFCLPKAGQ  
APTWDNLVIIFQWTTWVATFLSLVVMGLVFHVYFYREHTNATKWPTNSLLMTFSMLLGW  
GASFEPKSPT-

>HassIR76b

MAGIELIISSICNATFCDVOPYGGADKGEVLTPEVINFKSLMQDVNGKNLKVTTYNNTPLS  
WTEHHNGTVVGKGVAFVMEILRKKFNFTYDVIEPKRNYEWGGRAIEDSIIGLLNASKVD  
MAAAFMPTLIAYRKQVSFSIDLDEGVWVMMMLKRPKESAAGSGLLAPFNDLVWYLVLA AV  
LTFGPCITFFTRVTRKLIADGEGVLPLKPSFWFVYSAFLKQGTNLSPEANTTRVLFVTWWL  
FMILLSAFYTANLTAFLTLKFTLAIENPRDLYQKNFRWVASAGSSVEHIVKTEGEDLYYLS  
AMINNGKARFLSVLSKDFLDPVKRGAVLVKEQTVVDHLMYNDYTSKKDVEESEKCTY  
VVAPNAFMKKQRAFAYPVGSKLKNLFDPAQTQIFQAGILDFLKRSDLPSTKICPLDLQSKD  
RKLNRNSDLIMTYLVMVAGSATAVAVFGAEIFIKRYLSVKVNKTKKPKDRNKSKIGKKSTR  
YDDSRPPPYDSLFGKNPRFNVETTRTKIINGREYYVFETVNGDRKLIPARAPSSFLYRSDK-

>HassIR75q.2

DLDCPDIDTYFEKNSARNVFRAPFRWIIFGNTSTNDDDIVPRAISNIDVLLDSEVLVLRSD  
DVYEMHYIYKISPNTWQTEFYGTWDAKHRFQKSPRFFEPSTLRRDLIDGYEISICYVLTN  
NESVNHLSDGLDDHIDTITKVNFTTNHLLDFLNAKRKYIFANTWGYRVNGTWNGMTGY  
LVRGEVEVGGSPMFFTFERSIVDYIASPTPTRSKFVVFQPKLSYENNLFLFPNTTVWYST  
IALVFIIYLVLVLLVTKWEWKKTQDLIETREKDAGVLRANVVDIIVLIFGAACQQGSPSELKG  
SLGRVVMLVLFALMFLYTSYSANIVALLQSSSSHITLEDLLHSRIKFGVHDTVFN-

>HassIR75q.1

LCGILTFMSLERLKILEYFTSPTPIAARFVFRKPPLSYQNNLFLFPFTTGWWICLGAFVLILIV  
VLYINTKWDIKKYEQFNEQNMDQTCLPPTWSDTTIFVLSAISQQGSSNELKGTGLRVLVMI  
VFLAFLYTSYSANIVALLQSTSNQIRTLSDLLNSKLELGVEDVLYNRYFSPAQSASDPIK  
KAIYETKVAPRGKPNFLTLEEGVKAMQKRPFANMNTGTGYRIVSALFQEHEKCGLQEIE  
YYQNAKWLCGKNSPFSEMFKVGYIRIQEHGLTDRENRLTYAKKPVCSVMGSSFDVSH  
MVDFFYPVCLMLLYGMILAFILLVIEILAHRHQMRKHNQELNITQLQ-

>HassIR75p.2

MRILQAFVLILLERKAFARDRTLHVFIKSYVENEKPTILIMNNLCWEKKVVVSLANEIS  
KIGSRWSTSMGVDSRYFHDLLYLLDLD-

>HassIR75p.1

RNPVPNSRLELPGTATQRISEEPVKVTVTKYGRIEDYRSSKVLSSRRHDLRGHTLTMSNVI  
TDSNETRVHMNDRLNLHQDSITKMSYAVVKICFEMLNATERLMFTHTWGKDKNGQWQ  
GIVDQLLKEADLGTLTIFTQERMMVVDYIAMVVGSTAVRFVFREPPLSYISNIFTLPFSGAV  
WLAIFICVLGCSIFLYIASKWEASMGMHPLQLDGSWADVLLMIGAVLQQGCTLEPRYAAG  
RCVTLILFLALTILYAAYSANIVVLLRAPSSSVRSLPDLNLSPLKLGASDFEYNR-

>HassIR75p

NGKPRLYSLADGVERIRKGLFALHSVAEPVYRQIEATFLESEKCDIATVDYLVTFDSFTPVR  
KGSPYLELIRVVHKQIRESGIQSAIRKRFLVSK-

>HassIR68a

KEGCNVYVILLANGLQASRLLRFGDRHRIIDTRAKFIMLHDFRLFHSELHYIWRRIVNIIFIK  
HHNKMTGTAKGRPWFELSTVFPNPIKGVFVPRRVDIWKNENFHYKR-

>HassIR60a

LKFGGFEELHDLFYNSTDPFDYRIGDQWTDITNITEAMIDVAVHRNFSLLCSRLELAHISGI  
TPELSDSVGNKYKYTFTDNVFSVPIETIALRGFPFMMEFSTTITIFKQSGLNEGLRQQFGHF  
NERRRARQLRALLKEKSDVNPLSSKHLQGGFLALALGYVSGTLALIVEVIVNCDYVQNKF  
AQCKRRVNLLS-

>HassIR64a

VVMRKNTQYREHVAYALRRFSEVGLPQRLRSVDPEMPECAHTPDSSVFCVGIREFSTPL  
LVLALGMLVS-

>HassIR41a

VSQFRIHSFDELKRKSFTRSMAYSIEKLPAGNFAIGEYITQEAVLDMMLMLEDFYYEQCVV  
MMRKSSPYTEKVSQVLGRLHQSGLLAWETQVALKHLNYKVQVEVRLSRTKNDVGTTK  
PLNLDNVVGIFIVYAIG-

>HassIR40a

TTNLDIATKENKQKYYEFLGKALDVSDQRTSLILCEPYECENILFELTENNLIHSMILYFFY  
WSYGPVSDTFLMTMKEAMRVAVITNPRESVFRYYNQGTPDRLNQLTLVNWAGTLYKS  
PVLPPTDKVYHNRFRIFEVPVLHAPPWHFVKYNNNDNTT-

>HassIR31a

FDVETTWELEYLKSKKTSKFYQELERGVELIQQGNTAFHSEYNQIYPHFKTFSDDHIC  
KLQHVDTIPETLTWVTSTKNG-

>HassIR25a

MSTVTVLLLFHLVQIAFGQTTQNINVLLINEESNALAEKAFEVAKEYVRRNPSLGLAVDPV  
IVVGNRTDAKSFLENVCRKYNDMLLAKKTPHVVLDFMTGTVGSETIKSFTEALGLPTISGS  
FGQVGDRLRQWRTLQANQTRFLLQVMPADILPEAIRAVVTKQDITNAAIIFDEFFVMDHK  
YKSLQNIPTRHVITPVKSFEANEIKTQLESLRNLDIVNFFIVGSLRTIKNVLDAADKNQYF  
GRKTAWFALSLEKGDISCGCKNATIVHMRPTPDANSRDLGKIKTTYSMNGEPEITSAYFYF  
DLSLRTFLSIKSLDLSGKWPNDMKYITCDDYDGKNTPNRTLDLKTAFQEIKETPTYAPFFIP  
QDDPMNGRSYMEFSTDLLAITVKDGASISSHSLGSKAGLSSNLTLDPNNMSNYSAQLV  
YRIVTVEQKPFIRDDKAPKGFKGICYDLIEEIRQIVKFDYEIILAPDGNFGTMDENGNWNG  
IIKELVDKKADIGLASLSVMAERENVVDFTVPYDVLVGITIMMKLPRTPTSLFKFLTLEND  
VWLSILAAFFTSFLMWVFDKWSYQNNREKYKEDEEKREFTLKECLWFCMTSLTPQ  
GGGEAPKNLSGRLAATWWLFGFIIIASYTANLAAFLTVSRLDTPIESLDDLSKQYKIYAP  
LNGSAAMTYFQRMANIEEKFYEIWKEMSLNDSLKEVERAKLAVWDYPVSDKYSKMWQ  
AMEEAVLPNTIEEAIQVRVDSKSSSEGFALGDATDVKYHVMTSCDLQSVGDEFSRKPYAI  
AVQQGSPLKDQFNAILQLLNKRKLEKLKEIWWNNNPETMKCEKQDDQSDGISIQNIGGV  
FIVIFMGIGLACVTLGVEYWWYKWRKRPVVGDTVQVEPAKSTRNNVDKQGEFTFRGR  
NLGLTFKPKF-

>HassIR21a

FTNCFTFLGKNSWSKTDKITRLLIGWYWIFTIITSCYTGSIIFVTLVPFETVDTIKQLLA  
GFYRVGTLDRGGWEKWFLNSSDPQTMKLLNKLEFVNPVEAGIRNTTKAFFWPYAFLGSK

AELEYIVQANFTATKSKRAALHISNECFAPFGITIGFPNNSVYSEKMSLDIRMIQSGIIDKIA  
NEVKFEMQRSVTGKLLAAGSGTIKIPSAEEKGLTLEDTQGMFLLLGAGFIIAATALVSEWM  
GGFTRRCRFQRKNDTPISVNSREHLIPTPKTDIGSEIKIIGDTESKLHFDSRPSTAASRDTEG  
QIINV-

>HassIR8a

QEQLTHEISKALKLAESGKSDVKLDDAIVVLDRETEEESYRMLCSSLSKGVSMIIDL  
PWEMAEDLAAETGVPLVRTLLGSEQLVKALDDYLESRNATDAAIILESESDVDRTLYEML  
GASNIRVWVHAGLTRDSAKALKTMRPEPSFYVIVGENGFIMDTYRRAVKEKLVRRDFRW  
NLILTDYSTLELSQLVLPVILQADPGECCKLMKREDCSCPADFQRKQYILNALIQYIAEVY  
SKLDRDLPMTTSINCEEPEATMNSTRDLRFQFAEDTEISNETLFYWMDRSGLFLRSRFI  
LSTYKPTAGQQTATWSADEEYKLLPGVELEPLKMFFRIGTAPAVPWTLMKLDPETGEQM  
YDDDQPLYEGYCIDLIARLSETMS-

>HassIR7d.3

MIRVLRILVVQLLLRNCYASSKLIETAVNISITTYNLHFTTTVIWKQNESECVTGFLQSYPG  
SVVLSWPATYNDKVRDINETIGFKQTIYFANNLFEYEIIMELINEVIRFPIRFILVLENPVKS  
NSEISSFIEVTARNDQADLILISENDAGEVTLSTFFPYSEGVCNGYTPVFLKYGDELWPKKF  
SNFYQCPIRTALLEYPYVTVHFEKGGKITSVGGYDGGKILMILKKNASLEVTSAYNNVFGT  
YVNGTATGSIGDLATEKADILIPADILTEKRYTVTLPSHTYHTVDIRWVGPKQREVDWLK  
FIVPDKTNFTYLHLLVYILFVIVAMLVKCKPQMTSATNRILYQSFILLGQSAKFVTKSWLL  
NSLFLVLIWFCFFFRIDYQADLVDALQTLDELPFESIEEAVTKVEGYGGVEVVVDYKDY  
TPLERNYKVIPMNELKNYIRRIVEGENFILATDIALVKQLEPYVQILKKRISATGACFYMRP  
GWPAAKDVDDVIFSLVEAGFIENLLSDNNNHRWIVNRMNADDVLKPKSLSVEKLSTCFY  
GLVIMWVICFIILLIEIVHHNKHNE-

>HassIR7d.2

EIFRKKFRNLNFCPIIASTFIQPPYMYINNGVPRGIDGDLRMLIYGMNASLKVMTPSRGTG  
WGFREKNGTWMGSLADVDDLANSMTSAAITLRTDFQISSGYSTSKVVWVSESA-

>HassIR7d.1

EDPVSELGTLAAKVAFYNFWEFRFMTVVMYNTVQAIGLNTFLMHYEKSVVVKLGRFLPAR  
RSAVPQMIIFGEDASEISSTLRWTVRAKYDSNGKFIIICAHLEQECDELKIFQTL-

>HassIR2

MNLDDPDDYIYEDTVPYHANFIIISCQDYEELEELRQKLAASPYFHPLANILTYHHRREDK  
QTMAKLFFSAWYYKAINSILVQYSDEERTLLVSEYTPYVNEDYKVOPENKFGCWTARNLG  
MPVVGFDTGVCVEKCHNVSIHTRLRANNLGTCIGFNTHVVSYNDFKHLRNLKLFEDRT  
KDLHGFVLRAYAVEVKPFLLIKKHENGTYTLSARDGMIWNTMAELFNFGIDLSPSVDVM  
MKPFNFEISIDQIFAFARRKGDLCFLPIYQFDVIVVGLDFTYPFKDSGICILSARAGFETSLFR  
IKTLRDNVSTIILFLACFACTWATFTVYKAAEKRHLSFDQIGKDFMNTCRQILMINLYKPPS  
HHFFRIFLAIALWCFFVINFTSQATIISFFTAVKRGKEVDTFEDVVAAGYPLEAMASPDILP  
DTEEKFRINSRLVNEVDIYGCVDRLKTDPRRFCLLDCSVGRYIKRNKLNDRGEQYLHIAE  
QDRIHSHYLAMVFSEHSPMTERFSKYMMILCEAGLIRKWEQYRYTDIKDDVTTKPLAFDD  
LSGIFQVFCFMVGNTLIFFLELVASRIKTCQNIKIPHGLPKRNIE-

>HassIR1.2

GTKRISTARKVTLVTGLSCVLLYNYTSSVVSWLLNGPPPSINSLKELLESPELIYEDIGY  
TRSWLQSPSYYYNKRNAAIIEDELQKKVFNKKNAPLLEPLVQGIKMVKGGYAYHTEV  
DSANALISR-

>HassIR1.1

NLDGLINSDFELIFEDIGYTRGWLDNPGFFYYSGFKNVKEDELDRDKKVTAKKRTVPVLQT  
VNTGVPELLRTGKYAFHTEPYTASQVISKTYEDEELC-

>HassIR8

RTSPAPPPPRAPSSITAALVVPKAFGTRDYTKAEKAALS KLPRKLLFVRLNITLSTQG  
LTPSPMSILDSLCKEFLAVNVSAIYLMNHEQYGRSTASAQYFLQLAGYLGIPVIAWNADN  
SGLEKRASHASRLQLAPSIEHQTSAMLSILERYKWHQFSVVTSIAIGHDDFIQAVRERV  
ALQDRFKFTILNAIVVKRSSDLNELVTSEARVMLLYATREEAAEILSAAGDLHLTGENFVW  
VTQSVLGSMMQPNKFPVGMGLGVHFDTSSSSLIAEIATAVKVFAYGVESYVSEPENIRYPLGT  
RLSCSGAGAGEARWSTGERFYRHLRNVSVVEGEAGRPSIEFTPDGELKAAELKIMNLRPAL  
GEQLWEEIGTWNYSYPRERLIKDIVWPGGLHTPPQGVPEKFHMRTIFLEPPYINLAPPDP  
VSGRCSLDRGVICRVAPEVEVAGLEAGAAHGNSSLYQCCSGFCIDLLQQLAEQLGFTYELV  
RVEDGRWGTLHHGKWNGLIADLVNKKTDMVLTSLIINS DREAVVDFSVPFMETGVAIVVA  
KRTGIISPTAFLEPFDTASWMLVGAVAIQAAATFSIFFFEWLSPSGFCSTGNN SKRVPQNRFS  
LCRTYWIVWAVLFQASVHVDSRGTARFMTNMWAMFAVVFLAIYTANLAAFMITREEY  
HELGLDDPRIARPLTQRPLKFGTVPWSHTDATLAKYFTEPHAYMARYNRSTVSAGVTC  
VLTGELDAFIYDGTVLDYLVSQDEDCRLLTVGAWYAMSGYGLAFTRNSKYVSMFNKRLL  
DLRANGDLERLRRYWMTGTCKPNKQEHKSSDPLALEQFLSAFL-

>HassIR7

MCWYLLVLLLCVQKCTPQFVYTEMTEISYQIVGVFEKDSTIQMAAFNDSL NHVHVQEVTI  
RPATLQPRRTDSYSVWRELCNNAIQAVAVFGPQNPTDGAIRDQCAIANIPHIQATWQSM  
PDLELNEETTTQEEGEHEESEIPFKKISINFYPDSEEIALAYGKLLQYYKWGGFAALYEDNF  
GLLRVQKILAEVSLQSQIHMYKLDPEGDNRKIFKALRKFQVSRFLDCHSDHILHYLAEAD  
NAKLVSEYQHFVLVSMDSSTVAESLIKMPNSITWLSITQYDKLKDGGHYLATRVGNWRSN  
EESPSVVHFKLDSLIMDDVASHLVKALDVKDIAQPPVFGCTGDEEPWAHGAAYQQKILKT  
QSYGVTGNVEFDQRGRINYLVIINEIHIRDRQTIGRWESATGMINETRRLDSSAMAQQAS  
KEFVVISRRAKPYFSFKEKCEKTECKDDDKFEGFSVDLVDNIFRILREEKYNITYRFIHDY  
DMEYGKVDPTHTWTGLVGYLLDKKADLAVCDLTITEERKKVVDVSVPFMSLGSILYTO  
DRKVQPGMFSFLNPTYFEVWMHTATAYCVVSIILFICARISPADWENPEPCEKDPEELNIW  
TFKNCAWLTMGSIMTQGCIDLPKAIQTRWVCGMWWFFAVIVCQTYIAQLSASMTSALEN  
EPINSVDDLAKQTKIRYGAIQGGSTLDFFKASKDKTYRHM YDTMIANPALLVTNNDEGEE  
RVLKSKNMYAFFMESSTIEYKLRNCKLKKVGGELDSKDYGIAMPANSPFRTDINRAILRL  
KELTTLEQIKNKWWHEKYGAQKCEPTVDENDIEGDLEMENLMGAFVVLVVGLVFLFIT  
AIEFMNEVRNIVVREQVTHKEVFIKELKASLNFFQLQKPVLRNPSRAPSLASSSSDERREN  
QAKAIENFMNLEKAV-

>HassIR6

MHVLISSLLLVWVSQCVS AQEGPPIGGIFYKDS EDMKAALEVS AKSFNFTASIKEVSTRGEV  
LEISKYVCQLAEEGVIGIIDGTGGRSSEIIQLCDALELPHISIEHNDLYSDDWVFLNMYPSP  
TAYNMVLQKLILHKEWKNFTLLYTKGHSLIRVSELLQMGNDTLVVSLRELSGSDYRDVLI  
DAKHNGYRN FVVDTPSRYLEQVLLHAQQVGMMAEEHSYIFVSPDLFTLDMSRYKYGGV  
NMTGFRLVELQDKDNEKLNFTSTLNIETGKIFKPEQLKTQVLLIHDAVEVFAAASKKVK  
VQPE-

>HassIR5

MWSYHVFLAVLYCWGQLVSADIDRRRFSNPTYYNVGGVLSSNESIAFFKDTISNLNFKDQ

YVPRGVTYHDYSMLMDPNPIKTALNVCKDLIAHRVYAVVVSHPLTGDLSPAASVSYTSGFY  
HIPVIGISSRDSAFSDKNIHVSFLRTVPPYSHQADVWVDVLKHFNYMKVIFIHSSDTDGRAI  
LGRFQTTQSQVDEDEDVDRKVVVEQVIEFEPGLDSFSDRLMDVKGAQARVFLMYASKTDAEI  
IFRDATFLNMTTVGYVWMVTEQALDAANAPEGLLGLRLVNATNEHAHIQDSIYVLASAIR  
DMNTSEEIHAPPSDCDNSGSIWTTGRLLFDYVRKQRENGATGHVAFDDHGDRVHAEYD  
MVNVRAQGEHVAVGKYFYSKETQKMRELKEQEIIWMGRSTSKPEGFMIPHTLKVLTIEE  
KPFVYTRRIDDGSECTPEEIPCPHYNASEDTDQLYCCKGFCMDLLKHLKAINFTYSLALS  
PDGQFGNYIIRNFSQPGAKKEWTGLIGELVYERADMIVAPLTINPERAEFIEFSKPFKYQGIT  
ILEKKPSRSSTLVSFLQPFSTLWILVMVSVHVVALVLYLLDRFSPFGRFKLANIDGTEEDA  
LNLSSAIWFAWGVLLNSGIGEGTPRSFSARVLGMVWAGFAMIIVASYTANLAAFLVLERPK  
TKLTGINDARLRNTMENLTCATVKGSAVDMYFRRQVELSNMYRTMEANNYDQAEQAIED  
VKNGKLMAFIWDSSRLEFEAAQDCELVTAGELFGRSGYGVGLQKGGSPWADLVTLAILDF  
HESGIMESLDNLWILRNMLNCEENEKTPNTLGLKNMAGVFILVLAGIIGGIVLIVIEVVYK  
RHQIRKQKRMEIARHAADRWRGAVEKRKTLRAAILPSQRRAKSNGVKEAGSISLAVERGA  
RRRDEPRVPRYLPAYTPDVSHLVV-

>HassIR4

MRGANAIFLILFFGHLSALPDTIRIGGLFHPPEDEKQEVAFRYAVERVNADRAVLPRAKLLAQ  
VETISPQDSFHASKRVCHLLRSGVAAIFGPQSAPAAAHVQSICDTMELPHLETRWDYRTRR  
ESCLVNLPHPAALSRAYVDLVRAWGWRSTIVYENS DGLVRLQELLKAHGPESELPVAVR  
QLPDSHDYRPLLKQIKNSAESHIVLDCTTERIRDVLQQAQQIGMMSDYHSYLITSLDLHSV  
DLEEFKYGGTNITALRLLDPERADVQRVVRDWVYDEARKGRKLQLGHTTAKENMTFIKT  
ETALMYDAVHLFAKALHDLDTSQQIDVRPLSCEAEDTWPFGYSLINYMKISSPYCMRREA  
SEKLTGNAQFEGYAI DLHEISKILGFNYTFKLAPDGRYGSYNRETKEWDGMIRELLEQRA  
DLAIADLTITYDREQVVDFTMPFMNLGISVLYRKPIKQPPNLSFSLPPLSLDVWIYMATAYL  
GVSVLLFILARFSPYEWDSPRNCLDEPPVLENQFTLLNSLWFTIGSLMQQGS DIAPKAVSTR  
MVAGMWWFFTLMISSYTANLAAFLTVERMDSPIESAEDLAKQTKIKY GALKGGSTAAFF  
RDSNFSTYQRMWSFMESARPSVFATSNKEGEERVVRGKGAYAYLMESTTIEYVVERNCDL  
TQVGGMLDSKGYGIAMPPNSPYRTAISGAVLKLQEEGKLHILKTKWWKEKRGGGSCRDE  
TSKSSSTANELGLANVGGVFVVL MGGMGVACVIAVCEFWKSRKVAVDERKEEASLCSE  
MASELRSALKCPGGGAGGGGGGPGGARDGAGSPYLHYGFSTKSQLH-

>HassIR3

FHYRLRLVPDNMYGARDPDTGHWNGIVRELMDRKADIAVASMTINYAREAVIDFTKPFM  
NLGIGILFKVPTSQPTRLFSFLNPLAIEIWLYVLAAYILVSFTLFVMARFSPYEWSTSTHVCG  
HETKLLTNQFSVCNSFWFITGTFLRQGSGLNPKATSTRIVGGIWWFFTLIILSSYTANLAAFL  
TVERTVLP IQSAADLAAQHIIHYGTLNNGSTMSFFRDSNIDIYQKMWEHMSSASPPALVSS  
YEEGVRRLAGNYAFLMESTMLDHRVQRDCNLTQIGLLDSKGYGIATWKGSPWRDKIS  
LAILELQEKGVIIQILYDKWWKNTGDVCNRDGDGKSKANPLGVQNIGGVFVTLCLGLALA-

>HassIR2(2)

KIVQLPDGDDFRSQLKFIKSGSVNYIINCKRQTLPLVLEQAQQVGIMSDEHSYLIMNPDF  
QTIDIDPFKHGGSSITGIRMFDP SLESIQNFITSLNEKLTSENEIENAI AENGLTLDLALVY  
DAVTLFVSTLNAMSLEEGSNVTCDDAESWFGSSIVNYARTMEVDGLTGIIKFDEGDGFRSD  
IEIDVLEIMSYGLDKVGTWTLEDGFVETKDNVAPAELEGSESMKGKHFVLTALSAPYGM  
LKESLKKLEGNDRYEGFGIELIDELAKINEFN YTFDIQEDGVYGSYDKVVTGKWNMMMEKI  
MDGRADFAITDLTITAARQKAVDFTSPFMNLGITILYK KPTKEPPDLFSFISPFMVGWVWL

AGAFVGVSCLLFILGRLAPEEWQNPYPICIEPETLDNQFTLANSFWFTLGSVLTQGSEIAPI  
AVSTRMAGSMWWFFTLIMVSSYTANLAAFLTVESKFYAIKSVNDLASNPYGMTYGAKKG  
GATFSFFKESDNLLYQKMYHYMEDHPELQTSTNDQGLDRVKSDSENYAFLMESTSIEYMV  
ERNCDVAQVGGLLDSKGYGIAMKKNSPYRQPMSEILQLQEEGKLTRMKDKWWKEKRG  
GGACADDDAGGGEAQPLVLANVGGVFIVLAAGSGMAVVCAFVEMVFDVWII SRKMKVS  
FREELKAELKFILSFGDTKPVRHRESTGSGSGGSKDADEKNADAESPVDDDRADPSPTPR  
SERSGHSHTLHSRRQSNVQMAKMRKYSLR SAM-

>HassIR1

SFLEOPYLMQKPIEFGQKEELFGFCKDLMEVIAKKMGIKYKLKLSNDANYANDALPDIYT  
GVVGEIMRKEADIAIAPFAVTPERERLVDVFSEPFLLTDTPIAYTRTPRQLSDTFSFLRPLSKEI  
WLCVLFSSFAVSIVLFLVSRFSPHEWKSVSISDTQLDHTMSS-

>MsexIR1

MLSAVVSGLPYDAFDLCLDYFLYRNVKLICVLDCEVNVGITKFTKTANSHRMLVTVADLG  
QLNSSRVEQCLDQTLFPVGVV LNAGCPGTENTLLLVRIYELLLIINEATAGWALHPSKWR  
SPLPQRNTSIASQKMLFNHNLWLIIESNNEVDKNNITKSNDTLSPNVGLLETNLISVDADI  
TVASKIDSSEYILYEVFNFGKIQQGDLIINRAGSWNLQLLMDVDINGYKYRWDWFQWQ  
MRMIFVMSPIPKKNPKVL TERTPTPGLTTITKTSAMSLHVIAEIHNRFRKYTMADRWIGTF  
EANSTRVVANSLYFREQDVSPILRHQLYLYGKVDFINPPLTYIETKYYYRIPTKGPQKFNQ  
FLRPLSKGVWACLA AVSALCIVLLMSSLLERRPSSAQYAVFSVIASICQQFFEDVDIGNST  
RSSAARKLTILVTGLSCVLVHNYTSSVVS WLLNGPPPSITSLQELMDSPLELLFEDVGYTR  
SWLQTPNYYYNRRNAKIESELRAKKVFKRSSSSKLLVPLEEGIAMVKAGGYAYHTEPGA  
NEIISRMFTQRELCELGTLQSMKTNLVPGVQTQSPYKEFLVWSTARLVERGVVSCVQRR  
AASPSVQCDGSSPRALALGGAAPAFILLASGYGLATLIMFVERLIYSRLQNQINVTCELFR  
FK-

>MsexIR3

MSLRQDLLEFAYPIQPIYKWRFGFLLLLPEENNYFQLFYSKPFTRPLWNSLYIAAFIICIFFL  
LQLWEKRVVGVKQENGITYEMLVVMGSYCQHIPP LHSALSSRRTAYFVFLIFS YVIYSFYT  
SNLLSHLVNDRKIVTDITTLSTNDFDFVIIDHAKFILEYYHPLPKGSL SALIKKLIGLESV  
DGLRKVKEGNCALLSDYITLNPYIRMAFNDELCDLIQVDLFTDITKYFFTSKNFTYKEQI  
KIGIQRINEVGILRLLNENLAPVPNCHPTKHFQTKIIQIFVPLTLLCAYGLSLLILLGECY  
FKRYRFPYTD-

>MsexIR4

MIPGMCITLYALFLIPGLIYGEC PASMQATLPFMLEYAIWRGWHQAIVYTPHLEQDCKGSV  
TRLVKCLNLNGIAVSENSLSSPRIVTKLGIHICPDLRRSTSEK FV KLIDKLQDLQMNTASYD  
WLLTARFDEDFKYINSILNATSIRFDQNI AVTYPSRNVKSFSLGRELCDGNFLYKRNYPVSG  
DPFSIQNRSRYCSYCGNGVKT FYDRFYRTSERFKHLSNNR TYKHFGIVMPLYNSGLYYN  
YSRDFNMTDIMKFSVNRFKPLK FVNENYEQQGGIYILQYFKVRSNSTLYV SLLGIWSQE  
ESMSKVEIPYVPEARSFLGEELIVGRCNSSFDGTTSDVDEDVPTSPALLDDVLYFLTMRLNTT  
PSLRYYNKLGFRTYEGSWTG LLAGLIGNSVDVALEPVT AHSPRHQDMDFI FVAETMCNIY  
IRHQETSTVRDIFLAPFSTKLVGCVVGI AVIASLTAVVISKVSSKVRKNVHSLGYVESLIWST  
GILCQQGSVWSPLNPAASILLIVCLFFAMVTYNAYAAFITSVLSVRVASVDTVA AVLHSPNL  
KIGYIRNGADQMYLMSTKDTLLNAFYIRGYSNAENLVSSADEGLARAATQDYAFFAGQR  
AARSTLRSLSQARGRC AVRELPVHTTRAHLAFPLAKNSPYAKPLLVSLLHLRTGGSLARLE  
AALVPDMPYCATKAGFASARATDVRS AFILLGTGFVTALLGFGEYC WKNKHQQKEFIKK

YYEQFLQVIEA-

>MsexIR7d

MLSKLVLLKFVEFIYADTLDSTAAFLASSTYKLYQVTSVWSSRRSEDATDFLKRFGCV  
VTNEIHNNNNLTRLNKAAGYKQTVLFDVSVVEEFAYFINSVNLDLVPIQLVLVLTTFVED  
LSGVTRTAWQNDVADIIIVNQNFDDISLTTFFPYGKGCIDYSPVVLKIDAEAFFPNKFDN  
FYGCPIRTALMNFAPYLKVDKNGTLNSIVGIDGRIFLYVMEALNATIDVVSIEDHDMGS  
FINGTPKGCDFDLVNKEADIIAPAAMNYERYSSRAQISHVYDTLDVHWCAPSRRRIFTWAK  
VLLPLLDYITIYMFITFAVFTVTAMATRYGMRRVRIKDSIIFQTYVILIGQIQKFETESYVN  
YLFVLWLWFCIVFRIAYQGDLIQGMHRTIQEPALGTLENALKYVDGYGGLEVFNYYRDT  
PLAANFQILEVHDIGPYIEAIAAGKKFLILDILLVQEFDVKIQLDEPVSRAVTCIFMRPGWP  
AAKEVDLLMQYIIIEVGLTEKALKDYNNEWKRTRELKKEEYVHQSLDFTLSACFYGLVL  
MWMISSIIIEKTYDDIKQKQSNDRSSRF-

>MsexIR8a

MKTGVRLSDSIVLLDRENEEESYRLCSSLVSKGVSMIVDISWFPWEKAEELSSVIGVPIVRT  
LLGPQQLVTALDNYLESRNATDAIIVESEIDVDKTYELLGSSNVRVWVHAGLSRESAKA  
LKTMRPEPSFYAIVGDSEFVFNKYKRAVKEKLVRRNYRWNLVITDYVESSYIEFSQLILPTM  
FLQVDPAECCRVINQKDECSCPPMQKNQIILNSLIVYIVEVYSKLDDSTVTVRVDCELDQA  
ELNSTRDKLYKQFAEDTENNETIFYWIEDRSSLLLRSRFITYISDEGLTKVASWFAGENY  
KLLPGVTLEPLKMFRRIGTALAVPWTLPLKHPDTGEQLVNEEGQPLYEGYCIDLIEKLSA  
MNFYEIVTPKVGFGKLPNGTWDGVVGDLMVGETDIAVGALMTAEREEVIDFVAPY  
FEQTGILIVIRKPIRKTSLFKFMTVLRTEVWLSIVAALVLTGFMIWLEKYSPYSARNNPDA  
YPYPCREFTLKEFWFALTSFTFPQGGGEAPKALSGRTLVAAYWLFVVLMLATFTANLAAFL  
TVERMQTPVSSLEQLARQSRINYTVVESSVHQYFINMKFAEDTLRVWKEITLNATSDQA  
QYRVWDYPIREQYGHILLAINASGPVPAKTGFQQVNEHADADFAFIHDSAEIKYEVTRN  
CNLTEVGEVFAEQPYAIAVQQGSRLQEDISRALLELQKERFLEQMASKYWNETARQACPD  
ADESEGITLESLLGGVFIATLFLGLAMITLAWEVLYYKRKEKTKIHTLDVKKPKPFAQTK  
KNLEKLTGVVKLKRKRDVAKTAKLGKDTVIGDTFKPAKGVSYISVFPKNEYRP-

>MsexIR21a

MKCALVCILVFFQIVFNQEIEYYPSKASLGYKISKTISQTSKNNLITNLDDYKNAAGNKRK  
KVWRNFKNDNENITEKVTVKRAVDPVFHGYPKTREELWNEHFLNESSAFDQTPSLIKLIH  
NITLSYLKDCPTVLLYDSQVKSKEYLQNLKDFPVSVFHGYINDKNQLQEPKLLVPVRE  
CVHFIIFLTDVKVSAKILGKQSDSKVVVIARSSQWAVQEFLSGPLSRRFVNLLVIGQSFKE  
DDTTIEAPYILYTHKLYTDGLGASQPVVTSWSHGKYSRNVDLFPPKMTEGYAGHRFVVA  
AANQPPFVFRKVIDLDGGNPRVKWDGIEIRLLKLLAERNNFSIEIVEPQDLQLGPGDAVA  
KEIAMGRADVGAVGMYMTIERAREMDVTFASQDCAVFITLMSTALPRYRAILGPFHWH  
VWVALTFTYMFGMFPLAFSDKHTLRHLINNSGEIENMFWYVFGTFTNCFTFVGKNSWSRT  
TKITRLLIGWYWIFTIITSCYTGSIIAFVTLVPFPEVTDIDQLLAGFYRIGTLDRGGWERW  
FFNSSDPNTNKLKLELVPDVASGIRNTTKAFFFPYAFLGSQAELEYIVQANFSKTTSKR  
AQLHISNECFVFPFVTMGFPNNSLYTAKLSHDIRAMFQSGIIDKIVDEVWRDMQRSSTGKL  
LAASSGSLKIVSVEEKGLTLEDTQGMFLLLAAGFLIAASALISEWMGGFSRKRKRFRKDR  
GTNSADSRELVSPDPKAEINAVCDGTDSVLHFGTKSTSASSRDTLEGEIINVIEDSIIVHDN  
MDTEQWGSRRSSSFDLDREVKEIFEKDSQRRGIPVDDVDIDNRLGTASHGAFGDHINSKY-

>MsexIR25a

MLSAKKTPHVVLDFTMTGVGSETIKSFTAALSPTISGSFGQAGDLRQWRSLNSNQTKFL

QVMPADVMPESIRAIVTQQDITNAAILFDEFFVMDHKYKSLQIPTRHVITPVKSFNKD  
EIKTQLRSLRDLDIVNFFIVGSLRTIKNVLDAADENQYFGRKTAWFALSLDKGDITCGCKD  
ATIIMRPTPDAKSRDLGKIKTTYSMNGEPEITAAFYFDLSLRTFLAVKSLDSDGKWPND  
MKYITCDDYDGKNTPNRTLKSAFQEVKETPTYAPFHIPEDDPINGRSYMEFSTDLSAVT  
VKDGASIGSKALGTWKAGLANPLSLIDPENMSDYSAQLVYRVVTVEQQPFIRDDAAPKG  
FKGYCIDLIEIRKIVKFDYEITLSPDGNFGTMDENGNWNGIIEKELVEKRADIGLTSLSVMA  
ERENVIDFTVPYYDLVGITIMMKLPRTPTSLFKFLTVEHVDVWLSILAAYFFTSFLMWVFD  
KWSPYSYQNNREKYKDDEEKREFTLKECLWFCMTSLTPQGGGEAPKNLSGRFIIASYTA  
NLA AFLTVSRDLTPIESLDDLSKQYKIYAPLNGSSAMTYFERMAAIEVRFYEIWKEMSLN  
DSLSDVERAKLAVWDYPVSDKYSKMWQAMKEAGLPNSIEEALQVRVDSKSSNEGFAWL  
ADATDVRYHVLTSDDLQMVGDEFSRKPYAIAVQQGSPLKQFNNAILLNERKLENLKE  
TWWNNPNNSMKCEKQDDQSDGISIQNIGGVFVIFMGIGLACITLGVVEYWWYKWRKRPL  
VGDIMQVEPAKTTKDNVTKPESFNFRSRNLGLSNLKPKE-

>MsexIR31a

MLATITCDQSYLANIQKIQGVLYINHYGDKLLSQVDRDYFSIQYKWLIVGEENVDLHNIR  
YDADVTVNRLKQISRLNKSEISQHEVIHFQDVYAHPDDGVSIIHSWAYWMENKFLVTHD  
RARTLRRLDLKGHPLRIATPTGLYTEETYNGTFSEYLADEKLLRMDSGIRSAHESWLIDR  
LNATYVLLPTLLWSTEFHNSMFVKLQNGDAELSGAILRVLLSRINRLDYIQPIWPFVGF  
SYLAERESSNMVFVFAVSVWWACLGMGFILVLAQKVTSRTRMEKDGAFFTVLATCLQQ  
DASAVPEGLSGRWTFIVLSVSSMLVHAYYTS AIVSSLMSTGRSGPETLRDLADSRYAIASED  
YDYMRYLFFDVKTNWDDLEYLKKRKMSTKLYQTTEFGVKLVQRGDTAFHGEFNQIYPYF  
GTFTDDQICKLQYLDLTPESMTWVTTKLRGQWTVNFRSAGYWIQEVGLSKRLVSRLKAP  
RPS CRAALLAERVKFGDVALLMMLTVFGAVLSLILLGLEILFAKWRKRNTPLVREGSSLSID  
SVE-

>MsexIR40a

MYAREYLDKFTNAKVQEVRMRSEGDFLLTHDIHPTCGKSKHCKINNAAYSININDALTH  
NENPADVFYAPTQATAADCSPARRSPWGISKNYISHPYFRSSIEASQEHKASDNHSGAEE  
FEMKQPLLITYCLILLNINVVQLTTMFLTSILMFRIYYNQATPDRNLHLLTVNWWAGRLY  
KSPVLPADKVVYQDFKGRIFDVPLHAPPWHFVRYNNDSSVRVTGGRDDKLLALIAKKL  
NFRYRYDPPDRSQSRRISGNGTFKGTGLIWKQRQADFFLGDVTMTWERLQAVEFSFTL  
ADSGAFLTHAPAKLSETLAIRPFRWEVWPLVCATLLVTGPALWVIAAPSLWQRRQRDQL  
GLLNCCWFTTTTFKEPSKTHKARLVSVLISLGATYVIGDMYSANLTSLLARPAREQPIGTLS  
ALEEAMRDHGYELVETHSSSLAILENGTG VYGR LAKLMRRQRVQRVRNVEMGVRLVLT  
HKRVAVLGGRETLYDTERFGSHNFHLSEKLYTRYSAIAFQIGCPYLETFNNVVMTLFEAG  
ILSKMTTDEYKNLPEQARRSEPVTESDRESSDMTREPTATSQVQTESTKGLEPVSRLMLRG  
AFCLLGIGHLLAGTALTIIIEIQLYRRAKKRREP VHDTRKEALMKITTKMNRGICCA YRK  
TKTVIFRYVDRALGPGAANGI-

>MsexIR41a

MTLTPAQFFSPELELLHNLVVQYLSDSYCVSVVSETPLNFVFLPSFTYINPNDTDDNNLVEK  
LLKVSEEGSDYIVRFQNPQNFMAFEKVNHLGKVRRSRDRKLIFLSIPDVNYRNQALEML  
SKVECSFVANILLVLTSDENQCGESFDFVTHKYVGPDSEVNEPLLLDHWNACTQQFDRKA  
NLFPHDMTNMKGKTLKVSCFTYKPYVLLDLPVAVPLGRDGMELRIVEEFRCRWINCNVVI  
INEDKDQWGEIYENQTGIGIIGSVVEDRADMGITALYSWYEEWQAMDFSISCIRTAITCLAP  
APRILASWEMPLLPFSKLMWLAVVITFIYAAIGLLMAQKWSSNKALLIVFGILISQSQHKIG



DSWRVRSVIGWLLVAGMILVNAYGAGLASTFTVPKYESSIDTVQDIVDRNMEWGATHDA  
WIFSLTLSPEPLVKKLVSQFRIHSFEELKKKSFTRSMAFSIEKLPAGYFAIGEYITKDAVLDM  
QLMLEDFYEQCVIMMRKSSPYTEKISQLVGR LHESGLMLAWETQVALKYLDYKVQVEV  
KLSRSKNDVSVTEALNIKLVEGVFILYLIGVISAVILFIGEVLMEYYKSRVHAVIEI-

>MsexIR64a

MNVNFKLEFVLRHCLPDKIEIMVQKLVGTRLSKGILDHTAMNDWLNTCYFTKALTEELLQ  
LTADGVVPCVVRPFTVKELSQHPIEIDSDTTIADKTENVYDLYEYNTGFKKNIGIFKTVHIG  
DWRSSLNIEHPKRRNDLSGVVLSCPVVVLKLEEETFEHYLMQATHVGFDSLHKLKYITL  
LNYLKDMYNMTYDLQRTNSWGYIRNSSFDGMVGS LQRGQTDIGGSPIFFRADRNEIIDYT  
AEVWHSRHSFIFRHPKHPGSLYTIYTRPLSTIVWYSVLALLLFSTVVLVCFKLSWSQSSDS  
SFSLALLFLWGALCQQGTSLVQQSTSMKILIFSTFVYSAILYQYYTASVSTLLMEAPKNIK  
TLKDLLESNLRIGVEEALYDRDYFKRTTDPVALEIYKRKVKQGASENFFLPEKGMALVKM  
GGFAFHVDTIVSYGIVKKTFSEREVCDIQDVP MYAPHR LGAVMKKHSPYRDHLAYGIRKI  
METGLMYRIKWAWDEPRPSCVKTDPSSISVSILEFSTPLILAFGYWLSFVMLVLEIVLCCI  
TQRNVQKRKGFVSKIY-

>MsexIR68a

MCTMFGCLCAVLLVGVPSSEATSPILRGVAHNKELRWVLIDILHSLRPRDITCIAVISDSVY  
LNVFDGELFRITNVPFVMIIVAEEDLLSPNYITLKSLRQTKTDGCNVYIIFLASGLQVARL  
LKFGDRHRILDTHAKYIMLHDIRLYHKDLHYLWKRIVNVVFIKYHRKIIGNAKSRPWFDL  
LTVPFNPPIKSVLPRRVDIWRNDKFHYNRSLFVDKTYNLYGQQQLNAVYLDHVPSVVVTR  
DNETSKIGGVEVEIFKTLSELMHFEVNMYPAPHAELNKWGQKQANGSFSGLLGEMASGR  
ADAALGNLQYTPYHLELMDLSIPYTTQCWTFLTPEALDNSWKTLLPFKLNMWIAVLLV  
LLITGTIFYAMARYMNLQDYRHDHDKRPFANALNQHYPYTECRLHIYFADAKPVGLYVF  
GEIINSILYTYGMLLVSLPRLPTGWSIRLLTGWYWLYCILLVVSYRASMTAILANPAPRVTI  
DTLQELADSKVTCGGWGIETKKPEISDRFETINDPNDAAANRVAQGVYAYYDNSNFLKYIS  
VKRKSGLTMESDNATTNGSLVPPKPHEERDLHIMSDCVVNIPISIGFHKNSPFKPLADIYIRR  
IVEVGLVEKWLNDAMEPIRALEVNDDEEIKALMNLK KLYGAFVALAIGYFLSGICFLEIIH  
WNCMVKKDPMFDKYAIDVYYRNKNKK-

>MsexIR75d

MPYGTRAYHLSVTLGNMANPTACLAGIWLKPM PVKFLAAMLTVNLVPMGYLRDENRPH  
SIYNYMSPEDLVQLWRIAQQYGMRIDMRPDFQRLPDL LAYDFHREGVVLVDVTCPGTELL  
LRKASSNRAFIHRYSWLLLHNSSYDPTVIHSTLNTTSILPDSVGVWSSPDNLVDVYRVRPD  
KPLVLTTLGLPRDSSCEDLSKLWREMPAATRRKDLKNVYLTAATIITQPQFFKGWSDLRD  
RQIDTYPKFTYPIMMLCAEDLNFRYNLQVDFYGEDNNGSFNGLAGLLQRRDVEVGVTS  
MFMREDRWRVLHYCSETVELVGAFMFRQPAQSAVSNVFALPFSRGVWAASGVVFLAAL  
LLATITYRLRREDHALQPLSLPECFTFAIGTVCCQGGFYTFPSSVSVRVVMVSTLVAALFTFT  
AYSAKV VAILQAPSDAVRTIADLARSPMALGVQETTYKKVYFAESKDPATQFLYRRKLLPL  
GEGAYLSVVDGIARMRAGLFAFQVEQSGYDIISKTTFTEHEKCGLKEIQAFKLPMAVPIV  
KHCGYRELIASRLRWQREIGLMGRWRRRWLASRPQCDSAAGGFLSVGISDVLPAIEVLISY  
TNN-

>MsexIR75p.1

MNTDQTSVLVKMLNEFGISTASSLQPNRSKYFLQYVLIVVDLSCP KIEEFLVEANAQGYFK  
SPYRWLMINSGKASKILEKLDPLVDSVVIASEVGYGFLFTEAYKIATNSNIIYNKRCFWTE  
HNHDEYFTNGNVYTSNSTVITNNKELDSKTNKS KISMKIDKYGVTE DYRKS KVLSTRSD

LKRNPLTMVNVITDSNETRKHLDRLNLHQDSISKMSYAVVKICFEMLNATEKLMFTHTW  
GYRDKNGNWQGVVDYLIKKEADLGTLTIFTQERMDVVDYIAMVVGSTAVRFVFREPPLAYI  
SNIFTLPFTGTVWMAILICVLGCSVFLYITSKWEATMGMHPLQLDGTWADVLILIGAVLQQ  
GCNLEPRYAAGRCVTLFLFVALTILYAAYSANIVVLLRAPSSSVRTLPLDLLNSPIKLGASDFE  
YNRYFFKKLNEPIRKAIYDKKIAPKGKKNFYTMEEGVERIRQGLFAFHMELNPGYRLIQE  
TYREDEKCDLVEIDYINEIDPWVPGQKRSPFNFLKINFLKIRESGIQANIHHRLHVPKPRC  
SGTVSTFSSVGITDMYPAMLATLYGMMLAPAVLLEITYKMLMIVRQNKKVSTENLYITPF  
VN-

>MsexIR75p.2

MIVLTLFTGLVRASDDFNVQFITNFVINERKPTFLVYAGLCWKKHDEIKLTKALNKLGV  
TSSSLEVKSKFHENAVMFLTDLACDKSEEVIATATSRRLFQFSYRWLVLSNSTDALKMSLL  
EASPVLATSDLVLAERRDEMYTMTLHKPANNSTMVSTLRGYNGTFSDVRPRRELYWR  
RRDLMWHPITMANVIQDSNSTKYYLPRDDRLELQNDAAKVCWVFAKIAFDMLNATPQY  
IFSyrwgykVNGKWSGMIHDIGENRADLGTNCVLFKDRLDMITYTDLVAPMRMRVFRQ  
PPLAYVTNIFALPFSSGVWLAIAVCSMVSAALYLASIWEVKIEKSPTQLDGSIGDALLTV  
SAVAQQGCFIEPRRSPGRIMWVFFALMALYAAAYSANIVVLLQAPSNSIKNLAQLADSKV  
TLAANDVDYNRVFNDRDQLHISVHNTISPENKPHFYGIFDGVIRIRKGLFAFHSIVEP  
VYRRIEQTFLESEKCDLTEVDFINSLDAFTPVKSDPYLELLRVVYKQIRESGLQAALNKR  
YQVPKPKCLNKIAAFSSVGLLDIQPVLILMLYGVALSVAIAVCEIIVFKIANCCSKKKKIKIV  
HFKN-

>MsexIR75p.3

HKPSPNGSMVTTPRGFYNGSYVDIRPHRELFRRRGDVMGHPLTMSNVIQDSNSTQYHLPR  
EDALELNYDVTSKICWMIARLAFEMVNATPRYIFSyrwgyQVDGQWSGMINDLKNKA  
DLGTNCIVTDTRRLSVVSYTDSVAPYRVRFRQPLAYVANIFSLPFSSNVWIALVICCFAS  
TAAVVLGFKWEANLDKDSQYLTGNIGDALLTMSAVSQQGCVIEPRRAPGRIMLVVLF  
LMALYAAAYSANIVVLLQAPSNSIRNLAQLTASKITLAANDVDYNRVFNLYKDPVHQS  
VNNKINPDKGKGQFYTIDEGVEKIREGLFAFHSIVEGVYRRIEQTFLEMEKCDLTEVDFLSSFD  
PFVPVKKDSPYIELLRVTFKQIRESGIRAALNKRYQVPKPPCHTKSAAFSSVGLLDLQPV  
LMLYGIAISTAILAVEVAVFNM-

>MsexIR75q.1

MTGYLVRGEVEIGGSPMFFTIERIPYVDYISSPTPTRSKFVFQEPKLSYENNLFLLSFR  
TTVWYSTLALIFILFLALFLVTYWEWKARRYIESRETD SAILRPNIGDVVILIFGATCQ  
QGSPVELKGS LGRIVLLILFLTLMFLYTSYSANIVALLQSSSSKIRTLDDLLHSRIKFG  
VHDTVFNRYYFS TATEPVRKAIYEKKVAPPGSPAHFMTLEDGVKKIRKGLFAFHMETG  
VGYKFGVGYFEEGE KCGLKEIQYLQVIDPWLAVKKDTPYKEMFKIGISSESEWYSE  
DYGIWSKPYGLNKSSEINF SATIRRKDLRGLTIVTSLIISDNRTKYELYDFRNLLVDT  
VTKTTVRHLTPHYHFMNATKAFVFTDNWGYINGSWNGMIGDLARGDADLGGSLAFIT  
KERLTVVEYLSHPTPITAKFVFREPPLSYQHNLFLLPFKTTVWCCIGAFIVLVLILY  
INAHWDIKKFQHYRQKTMDFTALRPNLSDI TIFLISAMAQQGSHQELKGTGRLVM  
FILFLTFVFLYTSYSASIVALLQSSSNQIRSLNDLLH SKLELGVEDVPYNKYFST  
ATEPIRKAIYETKVAPKGSRPNFMNIDDGVKKLRNEPFAFNM NTGIGYKYVEKYF  
LEHQCGLQEIEYIENNTPWLPCKKHSPFREIYKVG LFRVNEHGLGD RENQLVYAK  
KPACTARGGNFGSVNMIDFYPVLLLLLYGMITAFLLLFLEIFIHQQMALTLS  
WNTAL-

>MsexIR76b

MAGIELIISSICNATFCNAVYDNPITDSQLTRKQMVYNDLAKQINGKNLKIATYNNYPLSW  
VERSANGTLYGYGIAFDIVEILKKKFNFYDVVVPEKNEYEIGGTKPEESLLGLANSSQVDM  
VAAFMPKLIVFQKMVTFSTDLDEGVWMMMLKRPQASAAGSGLLAPFNNLVWYLTLASV  
LSYGPCITLLTSLRSKLVGDKERTLPLSPSFWFVYSAFIRQGTNLAPEANTTRILFATWWIFII  
LLSAFYTANLTAFLTLSKFTLDIETTRDLYKKNYRWVSAEGSAVQYSVTNPNSDLYYLNKM  
INSGRALFRNFRHNFYLPVKSGLVVKEDLAIDHLMYNDYVQKTREGMSESDRCTYV  
VAPAFMKRQRAFVYPLGSILENLFNPVLHYILQAGIIDFLKATDLPLTRICPLDLQSKDRQL  
RNTDLMMTYFIMAIGLAAALAVFIGELIIKRYSRVKIKTLKRKRPKRAKASKPDDSRPPPYE  
SLFTKTQHSSRKSHKQIINGREYYVYQNGVDGTRLVVRAPSFLYR-

>MsexIR87a

MCGKMRAQFFLLFTIHVASAAGENPLLMATRNSDQIAKTAECVLKLSAKYFVEKXALSGS  
IVIININSYSTTQRLLLQTIHGVSEPYVMPPVRKIVNADYDDVYEFNKGAEINLVKIICQFT  
NMTLVVRTSDREENWGTIYPDGTATGAYGVLNRGTTDLVIGNIEVTRTIRKWFHPTVSYTQ  
DEMTWCIPKARQAPTWDNLVIFQWQTWLTLISLLIMGLLFHYFYKEHDNSTKWPTNS  
ILMTFAMLLGWGANFDPKSMTRILIFGWLCFSINMSISYESFLRFTLMHPRFEKQITTEAE  
LIQSSLSIGGREIYQQHFKNNNASSFYFYRKYRTTTFIDGIRRAALERNFAIVSARRQAEFQ  
DQKLGRGAPLIYCFPEENNLYKYGVVLLARKWFPMLERFNMIIRSVSENGLIDKWNEELFI  
HTASGEGASAIVPLSIQHLLGAFMFIGFMCVISVFVFLCELLSEYYGRKRKVIKCRPYIP-

>MsexIR93a

MRLKLVGFCLVCRVSGEEFPSLITANASIAVVLDQRQYLGDKYQAVLDELKDYIKELARVD  
LTHGGVVVHYYSWTSISLNKGFLAVFSVASCLDTWDLFSRTEEEELLLFALTEVDCPRLPL  
RSAITVTYAEAGEELPQLLLDLRTSNAFKWKS AVILHDDTLNRDMVSRVVQSLTSQIDDES  
ASPVSVSVFKMKHEINEYLRKKEMHRVLSKLPVKTGENFIAIVTSDVMTTMADTARELL  
MSHTMAQWLYVISDTNIHNSNLSGLIRALYEGENVAFIYNQTDNSPDCKNGIMCYCQEIM  
NAFISALDAAIQDEFDVAQAQVSDEEWEAIRPNKIQRDMLLKHMQQHISTKSRCGNCTTW  
RALAADTWGATYRHFTEDDILKENDNGTEATGVIEKVTLDDVGFWRPIDAMTFFDVLFPH  
VQHGFGRGKELPVITYHNPPWTILHTNESGAIVKYGGLMFDIVNQLAKNKNFTIKILLPGNV  
KNEISNETDALHSRRAMLALAAIAKQAALAAASFTILPNPTPGINYTIPVSTQPYAFLVAR  
PRALSRAMLFFLPFTADTWLCLGLAVITMGPVLYIIHRMSPYYEAMKITRQGGLATIHNCL  
WYIYGALLQQGGMYLPRADSGRLVVGTTWWLVVLLVVTYSGNLVAFLTTPKLEIPVTSIA  
ELIENRALYTWSINKGSYLEMELKNSEEPKYKALLKGAELTKPTHSETNAHAGVEDFMD  
ERVAMIVPAGSPYLALLNKEINRMHKAGLITKWLSAYLPKRDRCYSMSSMAAEVNNHTV  
NLNDMQGSFFVLLLGDFFFIVLNDETSLPFV-

>MsexIR143

MLQRIFLFCITLVCSTLLDEKKSNTSELSFGSISKISEFCKISLHFRSTAILEYGNNETVEK  
HLFFNEIIKTLSSDGIQIIIEDLTKIKNIEVAEADWMVVVYIYHCELSKFNNAMMHDKIK  
YLIIVPDHLETECKDDFIDVGNKVAYYDVTIFIFNNNEEDNTETYTISTFIREVDEATCKEIV  
HGFININNCQNGILESNIIVFPKNPTNIKNCPNIGMGTLYPFSIIQDRDILKTFDKLNESQIR  
GSDLELVKIAAKQFNATLNYNYVRKKEENPIGQYDFIPFIMNGSLDICAGGFYRIYGDVVS  
YSGIYARQAVKWMYTADRKDKSWQNLVHKVNGLYIFIYYVAYSCVWWLIRKFDKQSVS  
ATTTLIFAWGALVGAGSLQDTRSLKQKIVNLMYLIMCLHLSAYIAAQLYSFYTISEPPERLE  
TINDIMESGRPTYLVPVVKYFVIDENFRKYANQSKCEDTFYDCFESLIYKGMTLLLHAFF  
ANYQAKSAVGDEARILCTTQNVLTVYYEMLIRKNSPYVSKYQDIIIVRLFAGIPEKLYIEAI  
GLTVVGRAESASKNIIANSYSCQTGCTVTIRQLDGAFYIWLVGCGVSFCVFIVEIRKKARR

MSLHLI-

>MS|comp100717\_c0

PAVSSVRVVMFSTLLAALFVFTAYS AKIVAILQTPSDALRSIADLTRSPMVVGVQETTYKKV  
YFQESPDEATQQLYRRKIEPQGERAYLSVVDGIARVRTGFFAFQVEQSAGYDIKQTFTERE  
KCSLKEIEAFKLPLVAVPMRKHSGYRELFASRLRWQREVGLMDRERRIWLVS RPRCEASSG  
GFVSIHIDVLPALQVLALGAFLSVLLASEVG-

>MS|comp104026\_c0

LLDVDTAIEPKGRDGV EIRIVEELCRWMNCTVEIVREDVEQWGD IYPNETGGIGVLGSVV  
EDRADVAISE-

>MS|comp119947\_c0

FPTTNHLLDFLNAKRKYVFADTWGYRVNGTWNGMTGYLLRGEVEIGGSPMFFTFERSI  
VDYISSPTPTRSKFVFQQPKLSYENNLFRSE-

>MS|comp1203294\_c0

KSFTRSMAYSIEKLPAGEYITQEAMLDMMMLLEDFYYEQCVMMMRKSSPYTEKVSQLVG  
RLHQSGLLAWETQIALKHLNYKVQVEVR-

>MS|comp124776\_c0

KKYEKYSEQTL DQTCLPPTWSDITIFLLSAISQQGSSNELKGT LGRLVMFIIFLAFVFLYTSY  
SANIVVLLQSTSNQIRTL PDLLNSKLELGVEDVAYNRY YFSAAYTSKDPIKKAIFERKVAPK  
GKPNYMSIEDGVKAIQK-

>MS|comp129582\_c0

KEVMLGRADIGIAGMYLTSDRVRDMDVSMASHDCAIFITLMSTALPRYRAILGPFHWHV  
WLALTFTYLFGMFPLAFSDKHTLRHLLHNSGEIENMFWYVFGTFTNCFTFLGKNSWSKTN  
KITTRLLI-

>MS|comp131374\_c0

INLNGYKY YRRWDFQ NITMRMILVAQPAPKHL DLELLAGPSPVPGVAMITQTCATVLYEVA  
VMHNIKYFPTITDRWIGTNERNSSKVVSNSLYFREQDLSPVIRFLKSVQENS DVLSPSLTAIE  
TRYYYRIPTVGP GPKFE-

>MS|comp135198\_c0

FVGKYFNEGEKCG LREIQYLQVIDPWLA VRKNTPFREMFKIGTKRIQEHGLQYRENLLMY  
EKRPKCS-

>MS|comp136712\_c0

KRPFAFMNTGTGYRIVSAFFREHEKCG LQEIDYIQNSKPWLCSQKYS PFGEMFKVGYIRI  
QEHGLSDRENRLIYAKKPVCSVWEEASTQSIW WISILCVFYCCMERFWLLSCLALRFWCI  
VCRREE-

>MS|comp138392\_c0

WAAVAFTYFYASIGILTAQGFATTSYPFLKSFGMMIGQSQYQNVASNSWKIRSVTGWLLIA  
GLILSSAYGAGLASTFTVPKYEPSIDTVQDIVDRDMEWGATHDAWIFSLTLSTEPLIKQLVN  
QFRIYSFDKLKEKSFTRSMAYSIEKLPAGNFAIGEYITQEAML-

>MS|comp1582011\_c0

SPYLELFRVVFVKQLRESGIQSAVSKRLQVSKPHCSSKMSSFSSVGLMDMKPV LIFMLYGIC  
LSVAIAVAEI-

>MS|comp159644\_c0

MIIDLSWSPWRMAEDLASETGLPLVRTLLGSQQLVKALDDYLESRNATDAAIILESESDVD  
RTLYELLGASSIRVWVHAGLTRDSAKALKTMRPEPSFYTIVGDSGFVMDTYRRRAVKEKLV

RRSYRWNLILTDYSTPDVTQLVLPVTLQADQVECKLMKREDCTCPSDFQRKQYILNGL  
IQYISETYSKLERDLPLTTTSDCEDPQPVMNSTRDRLYRQFAEDSEISNETLFYWEAERSG  
LFLRSR FILSTYSLEAGQQT IATWSADDKYKLLPGVELEPLKMFFRIGTAPAVPWTLMKVD  
PNTGEQMFEDDGQPLYEGYCVDLIARLSETMSFDYEIVSPKSGDFGKLLPNGTWDGVVG  
DLMRGETDIAISALTMTAEREEVIDFVAPYFEQTGILIVIRKPIRKTSLFKFM TVLRTEVWLS  
IVAALVLTGFMIWLLDKYSPYSARNNP DAYPYPCREFTLKESFWFALTSFTPQGGGEAPKA  
LSGRTLVAAYWLFVVLMLATFTANLAAFLTVERMQTPVSSLEQLARQSRINYTVVEGSSV  
HQYFINMKFAEDTLYRVWKEITLNATSDQAQYRVWDYPIREQYGHILLAINASEVPDAK  
TGFQVNEHTDADFAFIHDSAEIKYE VTRNCNLTEVGEVFAEQPYAIAVQQGSRLQEDLSR  
ALLELQKERFLEQLASKYWNESARQACPDAD ESEGITLES LGGVFIATLFGGLAMITLAW  
EVFYYKRKEKNKVQAFNAKPEKVAFESKSTLESKVAESMAKLRKRAKVGKKGANIAKN  
VTFGDSFKPVSEKGVSYISVFPKEYRP-

>MS|comp161214\_c0

MAGIELIISSICNATFCEVPYNETYK GSGTDPMAEKDTNFMNLMKEVNGKVLKVTTYNNT  
PLSWSEYHNGTMVGRGVAFTVMDILRKKFNFTYE VVLPKRNYEMGTKMTGDSVIGLLNS  
SKVDMAAAFLPTLIAYRERV SFSIDLDEGIWVMMLKRPKESAAGSGLLAPF NELVWYLVL  
AAVLTFGPCITFFTRVRSKLITDDEGVLP LKPSFWFVYSAFLKQGTNLAPEANTTRVLFVT  
WWLFMILLSAFYTANLTAFLT LSKFTLAI EYPRDLYQKNYRWVASAGSSVEHVVKSEGEEL  
YYLSAMISNNKAQFLS VISDTDFLGIVKKGAVLVKEQTVVDHLMYNDYTSKKDVEESEK  
CTYVVAPNAFMKKQRAFAYPVGSKL KSLFDPVLTQIFQSGILDFLKRADLPSTKICPLDLQS  
KDRKLRNSDLIMTYLVMVAGSATAVAVFAAEIFIKRYVSGKIITSK LKKKSKMSKKSTN  
YDDSRPPPYDSLFGKNPRFN VETTRTKIINGREYYVFETASGEKKLIPARAPSSFLYRSDK-

>MS|comp165699\_c0

RPTPDANSRDLGKIKTTYSMNGEPEITS AFYFDLSLRTFLT IKSLLDSGKWPNDMKYITCD  
DYDGKNTPNRTL DLKTA FQEIKETPTYAPFFIPQDDPMNGRSFM EFSTELLAITVKDGASIS  
SHSLGSWKAGLSSNLTLTDPNMSNYS AQLVYRIVTVEQRPFIVRDDKAPKGFKG YCIDLI  
EEIRQIVKFDYEISLAPDGNFGIMDENGNWNGI IKELVDKKADIGLSSLSVMAERENVVDF  
TVPYDLDV GITIMMKLPRTPTS LFKFLT VLENDVWLSILAAYFFTSFLMWVFDKWSPYSYQ  
NNREKYKEDEEKREFTLKECLWFCMTSLTPQGGGEAPKNLSGRLLAATWWLFGFIIIASY  
TANLAAFLTVSRLDTPIESLDDLSKQYKI QYAPLNGSSAMTYFQRMANIEEKFYEIWKEMS  
LNDSLKEVERAKLAVWDYPVSDKY SKMWQAMEEAVLPNTIEEAIQRVRDSKSSSEGF AW  
LGDATDVKYHVM TSCDLQSVGDEF SRKPYAIAVQQGSPLKDQFNAILQLLNKRKLEK LK  
EIWWNNNPETMKCEKQDDQSDGISIQNIGGVFIVIFMIGLACVTLGVEYWWYKWRKRP  
VVGDVVHVTVQVEPAKSSRNNVDKQ GEGFNFRGRNLGLSFKPKF-

>MS|comp1872421\_c0

IDKITDEVRFEMQRSLTGHFLAAGSGTIKIPSAEEKGLTLEDTQGMFLLLAAGFIIAGTALVS  
EWMGGFTRRCRFRTRKVDTPISVNSG-

>MS|comp2100871\_c0

SVNSGEHLIPTPKTDIDSEIRIIGDTE SRLNFDSRPSTAVSTD TLDGQIINVSEDNFDVHNTFN  
VSRFDS-

>MS|comp395436\_c0

FAETWGYPINGTWNGMIGDIKRGKVDLCGIVTFITLERLPILEYLNQPTPVTAKFVFRQPPL  
SYQNNLFILPFTSNVWM-

>MS|comp50464\_c0

SFISLIPNSES LVMQIFNV SEMGCS DYIVRMQEPQKFMEAFETVVHKGNVRRSDRKIIIFLPY  
DEEYNEEYDVDLPSLVFSMKGSAYV-

>MS|comp634464\_c0

KRRRFVSHDMESLDENRSTVSRAAFGDPIKHDK-

>MS|comp71302\_c0

GGSNFVSVSMVDCYPALVILSYGAIVALFLLGLEILVYKREKILRKLSCVRHHNYE-

>MS|comp82009\_c0

GRLQRQEA E VGLASFFIRPDRMRVADFISETCVLACTFIFRQPSRS AVSNVFLAPFSGGVWA  
ACGGVA-

>MS|comp849777\_c0

DTIKQLLAGFYRVGTLDRGGWEKWFLNSSDPDTAKLLKKLELVPNVEAGIRNTTKAFFWP  
YAFLGSKAELEYIVQANFT-

>MS|comp88910\_c0

EDHPDCKNGIMCYCQELMDAFVSALDAAIQDEFDVAQAQSDEEWESIRPNKIQRDMLL  
KHMQVKKGLVHMINSTFFEVMTSKKS-

>MS|comp99629\_c0

VTKWEWKKTSHLIESRKR DAGVLRANGVDVIVLIFGAACQOGSPSELKGS LGRVVMVLV  
FLTLMFLYTSYSANIVALLQSSSSHKTLDLLHSRIKFGVHDTVFNRY YFSTATEPVRK-

>PxylIRd1

MAGIELLISSICYNATFCDAYYDNSGLDERLTKKQNEFLALRSEVNGKHLRIATYNNYPLS  
YVEEINGTLVGQGVAFVIVDILRKRNFNFTFDVILAEKNYESGGSKPEDSVIGLVNSSIADFA  
AAFLPILYDYQTKVSFSHLLDEGVWLMMLKRPKESAAGSGLLAPFEYEVWYLILAAVLSY  
GPCITLLTKLRNKLV TDEEPIPIPSFWFVYGAFIKQGTMSPEANTTRVLFATWWMFIILL  
SAFYTANLTAFLT LSKFTLDIEYPQDLLRKNYRWMAQEGGT VQYIVRDPNEELHSLNVMV  
KNGRAEFRAISNDFDYLPLVQGGAVLVREETAVLHLMYGDYLRKAREGV EADRCTYVV  
APNAFMTTMR AFAYPRNSTLRRLFDPV LNYVEQAGLIKHHLHRDL PSTKICPLDLQSKDR  
RLRNSDLLMTYLIMLAGLAAATAAFMGEMIFKRYIRVKWKVKVHSGLIGQKKKSQSKKK  
DTKKRWTD DTKPPPYESLFG RNSRYTGSENTE HKVINGREYWV VNTISGDRRLPIRTPSA  
FLYERK-

>PxylIRd1-like1

MNSEASANFAAASDALAQLYRNASVAGIRLVVTPFPRVAAGPRQPPLSPDGLDHLQGNVL  
DLACPGADEVIRKASETRSFNQRNAWLLLHDAPYNITELEASMSSIAILPDADVILFTSDIT  
VDFYRVTVHEPLQISELDIRNSSEQELA QFWLQRPSVVTRRRNLNNITVKAALVVTQPES  
FVGWDDLTTKGIDTIPKV TYPLILLLAQDLNISFDFTQVQSYGDLVNESFHNSAIGLLEQSRI  
EVAATSMLLRDRMRMTHFVSESADLKFFRPAFIFRQPPQSAVANIFLLPLSRGVWIASFIV  
FLLVAAFSLFSRRLMGLDPSLEVITPGETLTFAVGAVCQGGFFMTPNLQSVRVMFFFTFIT  
SLFLFTSYS AKIVALLQSPSNSILT VKDLAMSPLSCGVQDTSYKKTYYIVELSAGFDIISKTF  
TESEKCGLN YVDPFRLQAVGIPIKKHSGL KELVSNRLRWFRDTGLMDRVRRRISVQKPRC  
DSASISGVVTVGLTDCLPAFQVLMCGAAGSVAILFMEVSVHK-

>PxylIRd1-like2

MQVWTAVVVSLCVTWRLVGAEDFPSLITANGSIAVVLD RQFLGEQYQLVLDQVKDWVRE  
LARVELKHGGVVVHYYSWTTISLKKGFIAVFSIASCQDTWTLFSRTEEEELLLFALTEADCP  
RLPSDAAITVSYMEPGHEL PQILLDLRTTKAFHWKSAVILHDDTLNRDMVSRVQSLTSQI  
DDEDVPAISVTVFKMKHEINEYLRRKEMHRVLSKLPTRYIGNNFVAIVTSDVMSTMAETV

RDLGMSHTQAQWLYIVSDTNHTGNLTSLINALHEGENLAYMYNITDDHPDCKNGLICYC  
QEVLKAFVSALDAAVQEELEVAGQVSDEEWEAIKPSKLQRRNMLLKHMQQHISVNSRCG  
NCSSWRALAADTWGATYRAFTEDTAAPGKKKDADNDTTSVIEQIELLQVGTWRPVDG  
VRYHDALFPHVEHGFRGKPLPIITYHNPPWTFLLHTNESGTIVSYGLIFDIIDQLSKIKNFTA  
KILLPGNVKHDFSNDTVDSMQSESALATLSAVARGQAALAAAFTILSDPMPGINYTVPVV  
TQPYCFMIARPRELSRALLFMLPFTTDTWLCLGFAVILMGPTLYIIHRLSPYYEAMGVTPQ  
GGLSTIHNCLWYIYGALLQQGGMYLPRADSGRLVVGTTWWLVVLVVVTTYSGNLVAFLTF  
PKQEQPVTTVAELVGQRGTFTWSIRKGSYLESELKNSDEQKYVTLLKGAELLTSSPEIGLA  
GSGARVLHRVRTQRHALVDWKLRLSYLMREDHLRTDTCDFSLSAEEFMAEQVALIVPSGS  
PYLSVINKEIMRMHKAGLISKWLSAYLPKKDRCWKSSAVAQEADNHTVNLSDMQGSFFV  
LFLGFFIASSVLLLEWLYKRHKKKSEEIVIKPYVE-

>PxylIRd1-like3

MHIKSANGKKKKKKKRSKGGTGDTEVTQPDSFVGWDDLTTKGIDTIPKVTYPLILLA  
QDLNISFDFTQVQSYGDLVNGSFHNSAIGLLEQGRIEVAATSMLLRDRMRMTHFVSESA  
DLKFFRPAFIFRQPPQSAVANIFLLPLSRGVWIASFIVFLLVAAFLSLFSRRLMGLDPSLEVIT  
PGETLTFVAVGAVCQQGFFMTPNLQSIRVMMFFTFITSLFLFTSYSKIVALLQSPNSILT  
DLAMSPLSCGVQDTSYKKTYYIDNPHPATKVLIERKLRAQGERAFSYTAEEGVARLRSGQ  
FAFQVELSAGFDIISKTFTESEKCLNYVDPFRLQAVGIPIKKHSGLKELVSNRLRWFRTG  
LMDRVRRIWSVQKPRCDSASISGVVTVGLADCLPAFQVLMCGAAGAVAILVMELAVFKM  
FPVNEYRNEYSPSIGGLRKLKLYICENFAHRNGMMYNVKKCEMMVFRFRGGPERVPPVYM  
YGSAIRVVKQFKYLGHILTESLSDADMERERRALAVRCNMLARRFSKCSRDKIVLKA  
YCQSFYTCQLWTNYTRRAYIILRVQYNDALRILLRPRYCSAKAMFADARVPDFFAVMRQ  
RAAGCWDRVRSSSNELIAAINQDIYGNRFMIHWSCLHQSANKK-

>PxylIRd2-1

MKVTFDIIVISIALLFQVYVCEVVEYYPSLSKLSKPLQEKQKERQSIKYVPNKTANGHASD  
KKPKNKPKREVDTAFRGHPKTREELWNEHFLNKSSAFDQNPQLIVLLHNLTLRYLNDCT  
PVILYDSEVASEKEHLFKDLFEDFPVTFVHGKIDTDDKLNPDLLKPVREC VHFVFLDRLT  
TSKVIGMQASSKVIVARTSQWAVQEYLVSSLSRKFVNLLVIGQSFKDEDDKLEAPYIYLT  
HELYIDGLGASRPVLTWSHGKYSRDVELFPHKMQQGYAGHRFIIAADQPPFVRRVK  
SDLDGGNPRVIWDGIEIRILKLLGERNNFSIEIKEPQELHLGSSDAVAKEIAMGRADVGIAG  
MYLTNQRIQEMDMTAAHSQDCAVFVTLSTALPRYRAILGPFHWHVWVALTFTYLIGIFPL  
AFSDKHTLRHLLNDSGEIENMFWYVFGTFTNCFTFVGKNSWSKTTKITRLLIGWYWIFTI  
IITSCYTGSIIFVTLVPFETIDSIDQLLRGFFRIGTLDHGGWERWFFNSDPKTNKLLSRM  
SFVNPVEAGIRNTTKAFFWNYAFLGSKAELEYIVQANFSLTKSKRATLHISNECFVPGVSI  
GFPNQSLYTAKLSGDIQRMSQSGLLNKIVDEVWEIQRSTTGKLLAASSSGSIKIVSAEEKG  
LTLEDTQGMFLLLAAGAIIAAALISEWMGGCNRKCRPKKKVNSADRKILSVNSRENLIPT  
PKSDVSSEIKFITDDDDVDSRVYFNQRPYSAGSRDTLDGHTIHVTDETIIVHQSVDTRWE  
YRRSSMDLDKEVQEIFERDQRKRRFQSENILATNNITRHHTASKSAFGDPIISSTI-

>PxylIRd2-2

MADAAVDTKVAPPEVTSTEAAKESPVKKAPVKETKEAESNGKEENGSGDAPADSPAEN  
GDADESNDASENGDATEKKEAAVKRKSTADNGTAEKTTPEKKVPTKHRQKYNDMILAK  
KSPHVVLDFMTGIGSETVKSFTAALSPTISGSFGQIGDLRQWRTLTANQTKFMLQVMPP  
ADILPESIRAIVTKQDITNAAIIFDEYFVMDHKYKSLQNIPTRHVITPVKSFNRDEIKNQLK  
SLRQLDIVNFFVIGSLRTIKNVLDAADENQYFGRKTAWFALS LDKGDISCGCKDATIVYLR

PTPDAKSRDRLGKIKTTYSMNGEPEVTSAFYFDLSLRTFLAIKSLLDGKWPNDMKYITCD  
DYDGKNTPNRSLDLKAAFQEVKESPTYAPFFIPEDEPMNGRSYMEFNTEISAVTVKDGASI  
GSRSLGSWKAGLANPLSLSDPENMSDYSAQLVYRIVTVEQQPFIIRDDDAPKGFKGYCIDL  
IEEIRQIVKFDYEITLAPDNNFGTMDENGNWNGIIEKELIEKRADIGLTSLSVMAERENVVDF  
TVPYDYLVGITILMKLPRTPTSLFKFLTLENDVWLSILAAFFTSFLMWVFDKWSYSPYFQ  
NNREKYKDDEEKREFTLKECLWFCMTSLTPQGGGEAPKNLSGRLLAATWWLFGFIIASY  
TANLAAFLTVSRDLTPIESLDDLKQYKIQYAPLNLSAAMTYFERMAHIEVRFYEIWKEMS  
LNDLSLSDVERAKLAVWDYPVSDKYSKMWQAMKEAGLPNSIEEAVQVRVDSKSSSEGEFA  
WLGDATDVRYHVLTSCELMVGVDEFSRKPYAIAVQQGSPLRDQFNNAVLLLETVIRCILTM-  
>PxylIRk1-like

MIFRMGEWAFFLILFFGHLSALPDTIRIGGLFHPEDDKQEVAFRYAVERVNADRILPRAKL  
LAQVETISAQDSFHASKRGGPLLKQIKNSAESHIVLDCATDRIRDVLQQAQQIGMMSDYH  
SYLITSLDLHSVDLEEFKYGGTNITALRLLDPERTDVQRVIRDWVYDEARKGRKLQLAHT  
SAKENMTFIKTETALMYDAVHLFAKALHDLDTSQQIDVRPLSCEAEDTWPBGYSLINYMK  
IVEIKGLTGVIKFDHQGFRSDFSLDIIELTREGLQKAGTWNSSSEGVNYTRSYGENQKQIVEI  
LQNKTLIVTTILEVSVNDAAVSTRMVAGMWWFFTLMISSYTANLAAFLTVERMDSPIESA  
EDLAKQTKIKYGALKGGSTAFFRDDTSKSSSTANELGLANVGGVFVVLMMGMGVACVI  
AVCEVWKSARKVAVDERKEEASLCEMASELSALKCPSSGGSNGGAGGARDGAGSPYL  
HYGFNTKSQLH-

>PxylIRk2-1

TCSDAPWPHGKELRDNINTVSAHGLTGPIEFKDGVRTSFKLQLMRLAGGEGGGSVVAG  
HWSPGEGTLVTDPAAYMRDPPPNVTLTVVTVEEKPYVMVKEGWNLQGNARFEGFCIDLL  
ARVAARAGFHYRLRVPDNMYGVRDPVTGQWNGIVRELVDKADIAVASMTINFARETVI  
DFTKPFMNLGIGILFKVPTSQPTRLFSFLNPLAIEIWLYVLAAYILVSFTLVMARFSPYEW  
TSTHVCGHETKLLTNQFVCNSFWFITGTFLRQGSGLNPKATSTRIVGGIWWFFTLIILSSY  
TANLAAFLTVERTVLPIQSAADLAAQNQVQYGTNLGGSTMTFFRDSNIDIYQKMWHHMS  
TTSPPALVSSYEEGVRRVLGGNYAFLMESTMLDHRVQRDCNLTQIGLLDSKGYGIATWK  
GSPWRDKISLAILELQERGVVQILYDKWWKNTGDVCNRDGGKDSKANALGVQNIIGGLA-

>PxylIRk2-2

MIFRMGEWAFFLILFFGHLSALPDTIRIGGLFHPEDDKQEVAFRYAVERVNADRILPRAKL  
LAQVETISAQDSFHASKRVCHLLRSGVAAIFGPQSAPAAAHVQSICDTMELPHLETRWDYR  
TRRESCLVNLYPHPAALSRAVVDLVRWGWKSFTIVYENSGLVRLQELLKAHGPSELPV  
SVRQLPDSHDYRPLLKQIKNSAESHIVLDCATDRIRDVLQQAQQIGMMSDYHSYLITSLDL  
HSVDLEEFKYGGTNITALRLLDPERTDVQRVIRDWVYDEARKGRKLQLAHTSAKENMTFI  
KTETALMYDAVHLFAKALHDLDTSQQIDVRPLSCEAEDTWPBGYSLINYMKIVEIKGLTG  
VIKFDHQGFRSDFSLDIIELTREGLQKAGTWNSSSEGVNYTRSYGENQKQIVEILQNKTLIVT  
TILSSPYCMRKEASEKLTGNAQFEGYAIIDLIHEISKILGFNYTFKLAPDGRYGSYNRETREW  
DGMIRELLEQRADLAIADLTITYDREQVVDFTMPFMNLGISVLYRKPIKQPPNLSFSLPLS  
LDVWIYMATAYLGVSVLLFILARFTPYEWHQTSADGEKMNIFSLANCLWFAIGSLMQQ  
SCDFLPKAVSTRMVAGMWWFFTLMISSYTANLAAFLTVERMDSPIESAEDLAKQTKIKY  
GALKGGSTAFFRDSNFSTYQRMWSFMESARPSVFTSSNKEGEERVMRGKGAYAYLMES  
TTIEYVVERNCDLTQVGGMLDSKGYGIAMPNSPYRTAISGAVLKLQEEGKLHILKTKWW  
KEKRGGGSCRDDTSKSSSTANELGLANVGGVFVVLMMGMGVACVIAVCEVWKSARKVA  
VDERVYF-



>PxyIIRk2-like1

MEIAFLFLVFLINLGCIASELSLRFVFITEVQEPELAQQIARALKVSENIPELRLTDFIVYL  
DRENEEESYRKLCSAVSSDVSMIIDLSWSPWESATQIAEQTSIPLVRSLLGNQQLVSALDDY  
LEVNRNATDAALLLPSEIDVDKTLYHLLGSSNVRVWVHSGLTKDAARALKSMRPEPGFHAI  
GDNTFVTDYRRRAVKEKLVRRDYRWNLVLTDYSAANLDSMTVPTMILSADPTECKLL  
GQAEDCSCPADIQRKQHILNALIAYISEVYFKLDTSIPTVSVSADCENLRMSADMNVTRDR  
LYRQFAEDAALSNDTIFYWDEDQMGLFLRTRFTLSSYAPSEGLNHVASWSADEEFKLLPG  
VTLQPLRMFFRIGTTAAVPWTLPKLDPDTRQPMFTEEGQPMYEGYCIDLIQKISEVMEFDY  
EIVTPQTGTFRKLPNGSWDGVVGDLMRGETEFAVSALMTAEREEVIDFVAPYFEQTGIL  
IVIRKPTRKTSLFKFMVLRTEVWLSIVAALILTGFMIWLLDKYSPYSARNNPEAYPYPCRE  
FTLKESFWFALTSFTPQGGGEAPKALSGRTLVAAYWLFVVLMLATFTANLAAFLTVERMQ  
TPVSSLEQLARQSRINYTVVEGSTIHEYFINMKFAEDTLYRVWKEITLNATSDQAQYRVWD  
YPIREQYGHILLAINASGPVPDAKTGFEQVNEHTDADFABIHDSAEIKYEVTRNCNLTEVG  
EVFAEQPYAIAVQQSRLQEDLSRALLDLQKERFLEQLASKYWNETAQACPDADSEGI  
TLESLGGVFIATLFGGLAMLTLAWEVFYKRKEKNKIKSIDATVEKPKAEAFAPSKKSLLE  
TKMAEGVARLRKRDKKGGKGNLKNVTIGDTRPAADNANVSYIKVYPKDGFKL-

>PxyIIRk2-like2

CTSKGLNPIAIFGPQSPISDGAVRDQCARAHIQATWQPNPDMYTQPEPQPEEKGEEEEDE  
DEDSPPGEEDETEEEQOEIEEVPTFKKISINFYPDDDELAMAFADVIRYYQWNSYAVLHED  
DYGLLRVQKILARHSDKYSITVRRDPNGDNQKVFKEKTSRSSRVLLDCHIDHVDKYMK  
EAEILGMLDHYRHYILSLDGSILSDTMTHYQSNTWLSITNFESLKNQHTLSTRVGKWK  
NDIPNYASTAVTTLQTEALLMDDVANFVLTALKDLPEEVRDNAGHPCEREGPWELGAPLQ  
NQLLKTEMLGVTGLIKFNEYGKRVNYTLYVNEIHVNKRNTIAKWESATGELAENRSSDD  
EISQTSKHFVIISKIGKPYFYKKNQSLSDSEEEYEGFSVDLVEAIFDVLKNKMNLNYSYS  
FSKASYKDYGKINPETKKWEGLIGDLLDKADLAVCDLTITEERKSVVDFSVPFMTLGISI  
LYTKDHKVDPGTFSFLYPYSFDVWMLTATAYCAVSICLFCVCSRISPADWENPQPCDKDPEE  
LENIWNFKNCAWLTMGSIMTQGCIDLPKAIGSRWVCGMWWFFAMIVCQTYIAQLAASMT  
AASEQEPINSVEDLAQNNKILYGALNGGSTLSFFKNSKDKMYQRMENMMSNPVLRD  
NEEGERRVLSGKNKYAFFMESCTIEYKLKRNCCELKKVGGELDSKDYGIAMPANSPFRSQT  
NGAILRLKELTRLDEIKNHWWNDVNGAKNCSVDKDTEDVEGDLELKNLSGAFIVLVAGL  
FCSLVITAAEFMNEVRNIVVREQVTHKEAFIQELKTSLNFFQLQKPVLRNPSRAPSVAASVA  
SDRDARVNARLTSANFLDLEKVTQ-

>PxyIIRk2-like3

MNLGISILFRQPTAPEPKFFSFLLPFSTGVVWVCLGLAYVGSLLVLYVVGRLSPAEWQNPFFC  
VEEPEALHNQFTLANAFWFNLGAVLLQGSEIAPVAYSTRAAASAWVWFALVVTSSYTANL  
ATLLARKSSDELISGVTDLAHNPYGIEYGAKAGGATYTFEHSQNELYNEMFEHMKTKEM  
PTTNEEGIKKVMTENFAFLMESTTIDYETQRNCLVIQVVETLKS-

>PxyIIRk2-like4

MSQRSGAALLLILVITGRVYETA AAFRNFE TLKTTVTIGAI FPPNTVTEVAFASALARASME  
SEHHHYVMKVYVYAQYGD SFSASKAACQLTALGVIAIFGPTDPESATAVA AICRAAKIPHVQ  
AVWQPPPIRGPERLSPPSINLYPEAVALSRAVALFIKSDWNSYTL LYDDENGLIRLQEILKH  
ADQEHRWYVRKLTPEGEDNRPLLKSLKAMGETRVILDCPADRVKEYLRQANEVKFFEDYM  
SYVLMSLDAHSIDLGLDRYGLSNVTCLRIFDHD DARTRSFLADWKARGSDDVKIPKESHE  
ITVEIALASDAARLITDAVESAPEEFKLETQEIECGSDGQWEIGEMFTNHILTNP IVGITDQIA

LDNTTGERINFNVEIMELSNVSGFNRIAKWNADTGFYVRSASDVSGLLAEKWQNKTFKV  
VSRLGAPYLVEKVPAEAGEVLTGNDRYEGYSKDLIHEILKNTLNLYELEIVPGNSYGTYNK  
DTKKWNGLVGYLLDRKADLAICDLTITYERRSVVDFTTPFMTLGISILYSKATPPEPELFSF  
LKPFVSDVWIYMAAAYLAVSLTLHVLARLAPNDWENPHPCDKSPEELNIWHIKNSCWLT  
VGSIMTQGSIDILPKGYSTRWVAGMWWFFALIMCSSYTANLAAFLTNAAMDDSIKSAEDL  
MSQTKIKYGTLYGGSTYSFFKRSNVSTYQRMWTAMEASRPSVVFVTSNDEGLERVLKSKR  
KYAYFMESTAIEYQLERHCDLMQVGGLLDSKGYGIALPFFASYRTAVDNAVLKLAESGML  
VELKNRWWKVPEGEGTCASSEDAAEESGELGVDNVGGVFFVVLGVGCGMAAGMGALE  
FLWHVRDVAIEQKMSQMDAFWAELTFAISFWETEKPVASRPSSSASGSNNVSRASSVLRS  
AADLFNVFNK-

>PxyIIRk2-like5

MWWSISTFVGLLFLQCTSDVKITTIEEKFYEIVGIFEPSAHVQRRAFNESMKFTSVGEMR  
LGPRILEPPKTDYAVWRKLCCTSKGLNPIAIFGPQSPISDGAVRDQCARAQIPHIQATWQPN  
DPDMYTQPEPQPEEKNEEDETEEEQOEIEEVPTFKKISINFYPDDDELAMAFADVIRYYQW  
NSYAVLHEDDYGLLRVQKILARHSDKYSITVRRLDPNGDNQKVFKEKTSRSSRVLLDCHI  
DHVDKYMKEAEILGMLDHYRHYILTSLDGSILSDTMTHYQSNITWLSITNFESLKNQHTL  
STRVGKWKNDIPNYASTAVTTLQTEALLMDDVANFVLTALKDLPEEVRDNAGHPCEREGP  
WELGAPLQNQLLKTEMLGVTGLIKFNEYGKRVNYTLYVNEIHVNKRNTIAKWESATGEL  
AENRSSDDEISQTSKHFVIISKIGKPYFYKKNQSLSDSEEEYEGFSVDLVEAIFDVLKN  
KMNLNYSYSFSKASYKDYGKINPETKKWEGLIGDLLDKKADLAVCDLTITEERKSVVDFS  
VPFMTLGISILYTKDHKVDPGTFSFLYPYSFDVWMLTATAYCAVSICLFCRISPADWENP  
QPCDKDPEELNIWNFKNCAWLTMGSIMTQGCIDILPKAIGSRWVCGMWWFFAMIVCQTY  
IAQLAASMTAASEQEPINSVEDLAQNNKILYGALNGGSTLSFFKNSKDKMYQRMENMM  
SNPAVLVRDNEEGERRVLSGKNKYAFFMESCTIEYKLRNCELKKVGGELDSKDYGIAMP  
A-

>PxyIIRk2-like7

MIQIIPFILACANMGAVDAVSTTSFPIGGLFNAETKKDSMMAFQNIIVTKCNSYHGEPLFSK  
VMDAYSTALDVCRYASGRAAVTALLDARPTYGVCDATCLLANKLNITHLSVWPEPPSSLA  
ENPFTFYHPSPELISKAFALIRDVLEWDKFTILYEDDDSFIRLQEVINTWPPEHEPILYRR  
LDPKGDNRETFKYIFKVEHMSNHILDCHVDNVKKYFQEIIQVDNTTQYQSFILTALDAYM  
VDLAEIPELVANVSTLHLTIDDPDRWNDIKMDGHYMSLETALTADALNHLEASIRKMSDT  
DRDEYQGGPMKIEDPPSLCFMSSSEEYEREAWPPGERLRRAMIATQAYGFTGEIEFDEEGK  
RRNFKIYYSKLDHDSKFQNAAGFWNSTTDKITELNVVADRSTAQLPDSVIRVSVRVGSPYF  
MINETNSTHVYGYAVDLIDAFIHINSNDKFNTYKYEYFVVEGDSYGNPVEGTKNKKWTG  
MIGDLIEHKAELGACDLTITAERARAVDFSVPFMSLGISMLFKEPDPEPANIFSFIQPLTLDV  
WLYLATTYIIVSFILICARMSQDDWVNPHPCNQNPDYENIWTLYNCMWLTMGSIMTQG  
CDILPRAASSRWITGTWWFFVLIFTASYTANMMSMFLSNNRRSNDITNVKDLSEQNKISYGA  
GDNTSTYKFFQYSNDSVYAKIWSVMSTAKPTVFTKNNDEGKDRVLRSKGKYVFFMESTAI  
EYYTKRNCCLKMVGSKLDSKDYGIAMPKRSYLKKNVDAAILHLQELGEMDNLKKKWW  
EDENIKCDDPSKTEDDSSGLQMKNTSGIFLVLFGGFIGLIVAIIDFMLHANKIAVKEKITFV  
EAMSHWKAASLDPRVLHKAAGARSAAPSTRSSSRSRPARAVSVLSNIINFDDIY-

>PxyIIRk2-like8

MQWTLKLNRLCVLIVAFICYCFVVGDKNIGAIFFDDGTFLVQAAFKVALTDASKDQENPFVE  
NVAQTPPGDVYEAKEGVCQLENGLLGIFGPSNRASLTHVQSVADYLEVPHVIVEPMILQT

RNWSVINLYPHHDAYSQVFADIIVMKGWSEFTIIEGAEILPFLTNVLTIQDLDSDDDILMN  
VVQLPDNDDFRSFLQTIKKSQSVNYLVACTIAKLPTFLLQAQQVGIMSDDHSYLIMNPDFQ  
TIDIEPFKHGGSNITGVRLFDPSLEEIQTFVKAINEYVTELSEGGIENAVTEATLNLNLALTY  
DAVILYTAALTALGLEEGAASVCTKDDSWSYGSSVINYIRTMELDSLTLGLIKFDEEDGFRSDF  
EMEIVELMPHGLEKVGQWSEEDGYSQTRNIIPADLEGSDAMKGGKHFIVLISLTAPYGMMLK  
ESADKLEGNARYEGFGVELIDELSKMNEFNFTFEIQTGQVYGSGLDKTTGKWNGMMEKV  
MDGRVDFAITDLTITAARQKAVDFTSPFMNLGITILYKKPTKQPPDLFSFISPFSLVWGWV  
AGAYFGVSVLLFILGRFAADEWQNPYPCIEPETLDNQFTMANSFWFTLGSLLTQGSEIAPI  
AVSTRMAGSMWWFFTLIMVSSYTANLAAFLTVESKFYAIKSVTDLAANPYDITYGAKKG  
GATFSFFKESDNLLYQKMYQYMEDHPEYQTASNEEGLERVKSDDENYAFLMESTSIEYMV  
ERNCDVAQVGGLLDSKGYGIAMKKNSPYRQPMSEILQLQEQTITRMKDKWWKEKRG  
GGACADDDTGSGEAQPLVLANVGGVFIVLAGGSGMAAICAVFEMLFDVWATSRREKVPF  
KDELIAELKFILSFGDIKPVHRPRESTGSGSSKKEKEEEDAEEPDETEDHRDRMPTPARSE  
KSTHSHHTLHSRRQSNSLHMARSRKFSRP-

>PxyIIRk2-like9

MQWTLKLNRLCVLIVAFICYCFVVGDKNIGAIFFDDGTFLVQAQAFKVALTDASKDQENPFVE  
NVAQTPPGDVYEAKEKVCQLENGLLGIFGPSNRASLTHVQSVADYLEVPHVIVEPMLQT  
RNWSVINLYPHHDAYSQVFADIIVMKGWSEFTIIEGAEILPFLTNVLTIQDLDSDDDILMN  
VVQLPDNDDFRSFLQTIKKSQSVNYLVACTIAKLPTFLLQAQQVGIMSDDHSYLIMNPDFQ  
TIDIEPFKHGGSNITGVRLFDPSLEEIQTFVKAINEYVTELSEGGIENAVTEATLNLNLALTY  
DAVILYTAALTALGLEEGAASVCTKDDSWSYGSSVINYIRTMELDSLTLGLIKFDEEDGFRSDF  
EMEIVELMPHGLEKVGQWSEEDGYSQTRNIIPADLEGSDAMKGGKHFIVLISLTAPYGMMLK  
ESADKLEGNARYEGFGVELIDELSKMNEFNFTFEIQTGQVYGSGLDKTTGKWNGMMEKV  
MDGRVDFAITDLTITAARQKAVDFTSPFMNLGITILYKKPTKQPPDLFSFISPFSLVWGWV  
AGAYFGVSVLLFILGRFAADEWQNPYPCIEPETLDNQFTMANSFWFTLGSLLTQGSEIAPI  
AVSTRMAGSMWWFFTLIMVSSYTANLAAFLTVESKFYAIKSVTDLAANPYDITYGAKKG  
GATFSFFKESDNLLYQKMYQYMEDHPEYQTASNEEGLERVKSDDENYAFLMESTSIEYMV  
ERNCDVAQVGGLLDSKGYGIAMKKNSPYRQPMSEILQLQEQTITRMKDKWWKEKRG  
GGACADDDTGSGEAQPLVLANVGGVFIVLAGGSGMAAICAVFEMLFDVWATSRREKVPF  
KDELIAELKFILSFGDIKPVHRPRESTGSGSSKKEKEEEDAEEPDETEDHRDRMPTPARSE  
KSTHSHHTLHSRRQSNSLHMARSRKFSRP-

>PxyIIRk3-like1

MVCLTGAMGTLWIGLLMVSAGAGADMTLGGIFYEDDVDMQSAFNLSTRMYNFTSSMR  
TVQRGQILEVSEHVCDLVKEGLIGHIDGTGGRSSEHIQAVCDMLEVPHVVLVQHNDLFTANW  
SILNLYPSGEAYNTALEKLIHKGWQSFTVLYVKGHILGRVDNLFRLGNETS DMIVSVRELS  
GEDYRDVLIEAKESEFTNFVDCPSQNIELVLNHSQQVGLLADEHSYIFLSPDLFTLDTQY  
RYGGVNVTFGRMLDLKQNKMWYETADLNEETGQTRPEEIKTEVVLIHDAVKVFYEAL  
KKVAVEPQELSCDNYDSWAYGSSLLNFMRTNKINGITRQLLFDGFGQRTNINLEIMELTPA  
GNQSIGEFNGLLDIQRVLPVAQLTSESIMKNKTFIVLISTTAPYGYIKESLQELEGNDRYE  
GFTVDLIEELSKLLEFSYEFREQNKYGTLYANGKWDGMVAEIMDEKADFGICDFTITSDRQ  
RAIDFSVPFMTLIGIGILYKEPSKQPPMEMFSMAVFSDEVWVWMLFAQIGLVVMIFVGRISH  
KEWQNPVPCIEDPDEFSNQFSFANSVWLIIGSVMQQGSEIAPIALAPRMITSVWWFFTMVM  
VASYTGTLVAFLTVEKNVLPFTNVEELYRHKSISYGAKKDGSTINFFRDSKNEIYQKMYSK  
MKSNDPGWLVTNDIAVSIAEEKNYAAFMESTSIEYYKERHCDLLQIGELLDTKSYGIGMK

KGSEYKKHIDDALLTLKERGDIQKLKDIWWKEKRGGGKCGVKRDEEQKQLTLRNMVGA  
FVVLGVGCLLGLLISTLDMLWGVFKRSLKYQTTTFQYELVEELKFALTFSGDVKPVRRRPT  
EGSSEALADDPEAKDELKSLRSVRSSTHRTTHSHSHSSRHSSRSQSVAFARMRSYD-

>PxylIRk3-like2

MGAALGRLTGELMHYCWPLGVAYGGHVQKILPGGYATVGAAAFGTAVTQTVSTMVIVL  
EMTGQSSISLNPLLNQTLGIFYEDDQSAFNLSTRMYNFTSSMRTVQRGQILEVSEHV  
CDLVKEGLIIGDGTGGRSSEHIQAVCDMLEVPHVLVQHNDLFTANWSILNLYPSGEAYNT  
ALEKLIHKGWQSFTVLYVKGHILGRVDNLFRLGNETSDMIVSVRELSGEDYRDVLIEAKE  
SEFTNFVDCPSQNIELVLNHSQQVGLLADEHSYIFLSPDLFTLDTQYRYGGVNVTFGRL  
MDLKQNKMMWEYTADLNEETGQTREPEEIKTEVVLIHDAVKVFYEALKKVAVEPQELSC  
DNYDSWAYGSSLLNFMRTNKINGITRQLLFDGFGQRTNINLEIMELTPAGNQSIGEFNNGLL  
DIQRPVLPVAQLTSESIMKNKTFIVLISTTAPYGYIKESLQELEGNDRYEGFTVDLIEELS  
LEFSYEFREQNKYGTLYANGKWDGMVAEIMDEKADFGICDFTITSDRQRAIDFSVPFMTL  
GIGILYKEPSKQPPEMFSFMAVFSTEVWIWMLFAQIGLVVMIFVGRISHKEWQNPVPCIE  
DPDEFSNQFSFANSVWLIIGSVMQQGSEIAPIALAPRMITSVWWFFTMVMVASYTGLVAF  
LTVEKNVLPFTNVEELYRHKSISYGAKKDGSTINFFRDSKNEIYQKMYSKMKSNPGLVLT  
HNDIAVSIAEEKNYAAFMESTSIEYYKRHCDLLQIGELLDTKSYGIGMKGSEYKKHIDDA  
LLTLKERGDIQKLKDIWWKEKRGGGKCGVKRDEEQKQLTLRNMVGA FVVLGVGCLLGL  
LISTLDMLWGVFKRSLKYQTTTFQYELVEELKFALTFSGDVKPVRRRPTEGHSSRSQSVAFA  
RMRSYD-

>TcasIR40a

MRRDHGGDLVSASFIVAGFLFEEICICFDKNTNINFLQHLLVRFVSNNAIKLFNITTVVQ  
DKYFAFLNYQVTNHLGANTIFFSSHKFYEHVLEINERDFIRRNLIYIFNWGRPFPSRYFVR  
NIINVMKVFVITNPRNDTFRIFYNQAVPYKHHLEMVNWWQHGVGLFNHPTLPAKYNNV  
FKDFKENVFKIPVIHKPPWHFVQYGNDSIKVTGGRDDRILSLLSKKLNFRYDYDPPERIQ  
GSSASENGTFKGVGLIWKRQAEFFIGDVALSHERANYVEFSFITLADSGAFITHAPSKLNE  
ALALLRPFQWQVWPAIGVTFVVVGPVLYAIIALPNAWRPRFRVRSCHARLFFDCTWFTTTV  
LLKQTGKEPSSSHKARFFIILSISSTYVINDMYSANLTSLLAKPGREKAINNLNQLEKAMAT  
RGYDLYVERHSSSYSLFENGTGIYSRLWQMMNRRQTHFLLESVEEGVQLVRDSTNKAVIA  
GRETLLFDIQRFGASNFHLSEKLN TAYS AIALQLGCPYIEEINKILMAIFEAGIITKMTENEY  
EQLGKKKQTTSETEKELIPGVKKENRRVAKVSEDNEKLQPISIKMLQGTFFYLLCIGNIFSGF  
ILLAEILVYKHKRKYKHKRHRHFVYLRKIRHSVASKFGAVVDAVRRVYRRAMHDAFVAT  
LEYLE-

>TcasIR21a

MQRGLIVLKLCLTALALKSLDKRALQKSHEKSQLEKWEDKFLNRDPSFDQTASLVNLSK  
VALDELSGCSATILYDKFTETSSDLLLEKLFRTFPIPYLHGQITDKYHMKVPKLQTSQDTCT  
GYILFLKDV MRSDV VGPQTNNKVVLSRSSQWRVYEFLLASEQSQSFMNLLVIAKSEKIV  
SSSIARLICLALHLKFGTALAIYAPNGGKSAVYPSVIANVPKLGFRSAESVTSVITQNGANL  
GIGGLYITDTRLKATDMSHIHSQDCAAFISLASTALPRYRAIMGPFHWTVWLSLTLVYLF  
FPLAFSDKHTLRHLLDKPEEVENMFWYVFGTFTNAFSFFGKDSWSKTDK FATRL LIGFYW  
IFTIIVTACYTGSIIAFVTLVPVPATVDTPEQLVRGKYTVGTLDKGGWQYWFENSTDPITQK  
LLTRIDFVPDIESGLKNTTKAFFWPYAFLGSRAQLDYIVRTNFTTINKRSL LHISSECFV  
VSIYNKNALYSKIIDQGV LQAVQSGIVDKIKNDVEWETMRSASGKLLAANSYGKSLKALT  
VDDRALTLD DDTQGMFLLLGIGFLLGGASLLSEWMGGCLHLCKGNRNQSATSIQSNYRSHE

VPTPREKLDSMQFNSFENHKIEEEIVEERNCCIHRQDDDDIEEHINRLDFEGVFGEANPDS  
RTGPEEELSFKNTTKAFFSLYAFLDSRAQLDYIVRTYFTSMNKRSLLHISSECFVPGVSIY  
NKNALYSKIIDQGVLAQVQSGIVDKIKNDVEWETMRSASGKLLAANSYGKSLKALTVDD  
RALTLDDTQGMFLLLIGFLLGGASLLSEWMGGCLHLCKGKRNQSATSISQSNYRSHEVPT  
PREKLDSMQFNSFENHKIEEEIVEERNCCIHRQDDDDIEEHINRLDFEGVFGEANPDSRTG  
PEEELSEENGKK-

>TcasIR76b

MGLFEIALAALCLNATCPGEEEPPEFPEVQYLAPDSNDRKTLFAQLTEQLKNENLIITLKN  
DRLSGTEKRNNTILGKGIAFDLLNILQDKFQFNNTLIEPKANVWGAEKFGVLDLLKDKKA  
NLSAAFLPVLTQYSNHISYSPSLDTGEWVVLKMRPKESATGSGLLAPFNLPVWLLILLSLV  
VVGPIYFIIYLQAKLCKDDNKNKVFPLPACIWFVYGALLKQGTTLNPMTDSSRLLFATWWI  
FITILTAFYTANLTAFLTSLKFTLPITEPKDIGEKRYKWVTTKGNAL EDTVTVNESLTELGI  
LGQPQRYLYVSDSDILRNYVHKRNWMFIREKPIVEYV MYDDYKEKTRNQIEEAKRCTYVI  
TKFSVVSFSRAFAYSKDFKYKPLFDSTLVQIVKCHKCFSLLSRIQYLVESGIIKFKLREELPD  
TEICPHNLGNKERQLRNSDLLMTYEIVGGGFIISAIVFIIIVIIRRQKKPKTKSLPLQNPKNH  
TFEINLNNNYEKFGHFPYSSKFVTPPPPYHTLFPNPPHKSDNMKKRNFN GREYWVYDSISG  
ETKMIPMRTPSALLFQYTN-

>TcasIR93a

MLELVLSSAFVCVIRGDSFPSLLTTNATLAVIIDREFLSNEYEVIKHAIESYLVFAKREILKH  
GGVNVQYYSWTTINIKKDVTAFISIASCPDTWRLFRQARDANLLHMAISESDCPRLPDEA  
ITVPLITRGEELPQLLLDLRTRQTYNWN SA FILDYD DTL SRDQVTRVVK SITAQYSNLRVNA  
AISFVKLETRLPMDEIRRQVKEILSSVSIKTVGGNFLAIIIGYELVELLMEYAKMFGLVNTRT  
QWLYIISNTHFRHKDINFRQLLSEGDNIAFLYNNTVNNDTCTGGIQCHCEEILSGFTRALD  
EAILFEWETSSQVSDEEWEAIRPSKLDNRNSLLQGIKTFLLQRGQCDNCTSWLMKTGDTW  
GREYQQNGTDSGGLISVGNWRPSDGPSMSDELPHIVHGFRKRNLPIVTFHNPPWQIIRSN  
ESGAVSEYAGVIFELIKELSKNLNFTYTVELAKIGQEFSANLTKNEAQVVTNFIPDSILDMIR  
NKSVAFGACAFTVTEESKRLINFTSPISTQTYTFLVSRPRELSRALLFMSPFTGDTWLCLSA  
SIVSMGPILYIHKYSPVYKYGLSKRGLSSVQNCIWYMYGALLQQGGMHLQPADSARII  
VGAWWLVLVLAATTYCGNLVAFLTFPKIDIPITTIDELLAHSGTVTWSMPKGSYLERTLKY  
TTEPRFRYLFDDKVEVGNFKNMIEDIENGKHVIDWKIKLQYIMKQQYLDSDRCDLALGL  
DEFLEQLAMVVSQDTPYLEIINDEIKKLHQVGLIQKWLTDYLPKKDRCWKNRHHIVEVN  
NHTVNMDDMQGSFFVLFLGFLLSFFITIGEKLWHKYVTKKKMKIIPFTT-

>TcasIR64a.1

NKISLILVILSKTETYIISCLSNAIVDFAILANVAFSLRISCYKLFMHIKLIANVFYNQLDQV  
LNRNHYHLAVIIDSGCIDYADFAIQDKKYFYETYHVLVPTTPQNLNNSLNFLQKSPLNINS  
DVNVAILNGEGTKWSILDVYNPASHHGQFTVTKLGLCDETNGYQAKIAGNKYWSRKN  
MTGVQFKSAVVVPDPSIKLNDYLTSDKNRQLHSMHRFQSVTVNYCREMYNFSLEIQRTNS  
WGYLTPNGHFDGLVGLLERRLVDFGSSPLIYKLDMPVIDYSYGNWVLRSTFIYRRPKIIE  
ASYKIFLRPLSRTVWICIVLMMVLLMLFLKVVFSREKRLQKRNLDSSWSFLFLFTLGAF  
CQQGATCHPQLSSRTLSIFVFLFCILTYQFYASIVSYLLIDPPRKINNLKDLSDSNLRAGIE  
DILIDRNYFVQTTDPVAIELFNKKIKFSNNNSGFYEPWDGLDLVKQGGFAFHVETSTAYPIIE  
ETFTNEEICELEEVQMYRTQPMHTNLQKNSPFREMMNYCMLHLVENGLMYRLRKYWDA  
RKPMCIESA KFTFN VGLKEFSSGLIVLSYGILISLGLLLREVIVHKK-

>TcasIR64a.2

MSPPLPFMILLSVLTQTHALLDINLIENYFTEKSIKSATVFGCFRKTEQLNLVKIFSRGSSPIS  
VLNLNQAGVYQSIKSNHQIGVVLGDGDCPESESFLITVSPGFTHIAPNVVFISVRSTETXFD  
VKHHWLILSKSIQFLEKIKNAVVNINADIHVAVQSGTNWTIFDVYNPASEHGGSLKYTRVG  
FYSRGRGYNAAQTNEAKYWRRKDMTGVTFTKTMVLLVPFEGPLEDYLHNDNDRNINTFN  
RFQNKLLRFCRDYYNYSMIVELGSSWGYPPNGSFDGMVGAMEKKLIDFGSSPIFVREDR  
ARVIDYGRNTWSWKAGFLFRSPKSRTSIEIFLKPLSTSIWLITGVLATASIVILKMVTTFERN  
RYHSTSETSWLSLFLTLGALCQQGSPWVPKMACGRITASIFLLSLIYQFYSASIVSHLLM  
KPTNKIRNLKDLTDSSLKVGCEDIYNKDLFAHTTDDKVLKDLYAKKIYGKNGTSHFFPPEK  
GLDLVRQGGYAFHIEVARAYPIIETTFPDNAICELREVKLFKNTDLYNTMQKGTFFRDMLE  
SCFQRLAEQGILDREKKHWHPRKPECIQSSQAFVTFHVGLDEFYPALLVLLIGIVISLTVLV  
VEKQIHIAREKMEREKGVVF-

>TcasIR64a.3

FQLRVLMERLFFLSVLAVIYTTNCTDNHDIITSYIKEKSVKYATVFGCFTKKEKINLVKIIISH  
ICPISVFDINRLNIENRMESRHFHTGIILDGDCPSAEKFLINCGRSYLFDVKHHWLIVASSEKI  
REKFNNVILNINADINVIIEKPSNWSIIDVYNPASQHGGLNFTRVGFYNKHDGYKIKYTG  
VKYWNRKNTLGVTFKSMVVVYTKTXKNSAYTIFQLPVPFEGTLQHYLDSDDNDRDVNTF  
NRFHSLISFCRDYYNFSLDIEVSKSWGYNEDGTFDGMVGALEKIIDFGSSPLFLREDR  
ARVIDYGRNTWILRSLIKQQFRIISNWGFSAAFIFRNPKVRTSLEIFLRPLSSVWLITGLLAI  
VSIILKLATSFERRRYVYDVETSWSISVIFTLGAFCQQGSPSTPKMACGRIATFFIFLLSVLIY  
QFYSASLVSHLLNKPLTKIKNVRDLLSPLKAGCEDILYDRDYFLHTTDDKVAKELYAKKIL  
GKSNSSNFHTPEAGLKLVAEGGYAFHVETATAYPIIESTFQDQAVCELREVPLFRTQPMHAN  
FQKKSPFRDMFDTCFQRLAEHGLLVRERKHWHPKPECIQSSKSIRFNVGLDDFYPALVIL  
LVGIVASLLILVIEKEFRILTENPA-

>TcasIR75q.1

SFLGTILTUYKQLAEKKIVLNVLTNHWKINQTKLSQHTFLVGDITLCPQFNSSLSHVSKFFC  
YQNSQQTGLQIITSSXKWLVDQNSTVNTNDLLLDNSNFAVASQISNGRFHLKLCYKRAPNE  
TIKFNEIGVFSNGFEYYNHFIPTNRSDLSGVNITVSYVVTKPDYPFVDEYRFRHLEAFSK  
LSYAMVYPMLEMLNCTKKFIQRSSWGYKGANETQFVGGMFGDIQNGTAEIGGTVSFYTV  
DRMSVVDYLSVTTPSDLKFILRAPPLSYVNNLFTLPFDTKVWYCLYFIVGVTVLILYVIVR  
CESTYENALERNNIDNIKPKFFDVVMLQIEAITQQGSENEPKTMSGRIAVFVFLVLMFLY  
TSYSANIVLLQSTSANINTLQDLLNSKITLGVEDVVYSHHYFETQTEFTRKSIYEKKVAPK  
NQKSNFMTTEMGIEKMKDEFFAFHVETTAGYKQIMDTFQEHEKCGLEIDYLNVLVPSITI  
RKNSPYKEIVKVNFRKIYESGIRHRQLNRIYKPKPHCVGKGGSFKSVGIVDIYFSVEIFAIG  
CFMALWLLLLLEVLFKKKIKFLVQ-

>TcasIR75q.2

MKILIVFICLLINETTQNNFTDNLIVNTFNFIKILNVPVKISAHICWTRGKFDSSLMKLYXTV  
LANTIHFIKISISDKYNTNLIKNSPKYANPEHQLFIIDLKCNDSLSVLQQAEEKFLKFKSPFK  
WLLLGNSESLPNLYFGTDSQIFVTEPRSQLDDIKTIYKYSMPVPRFVQHSFDRFYTNTKRT  
NLMGTTIKISYVITNLDLNLHLDYRLQELKKKLYHFLICRNSHIDAINKLNILVHNLM  
FLNASRQFTMQPTWGYKNSTTGLYSGMAGDLQKGLADLGGTPLFFTPDRIDIIDYIAATP  
TYMKFIFRAPPLSYVTNVFTLPFDSAVWHYCFVMVAVVVVCIVIVVWEWKETKFEED  
THSHIDTLRPNIFDVVMFEIGAITQQGTNAEPKSNSGRIITIFSFLTLMFLYTSYSANIVALLQ  
STSDSIKNLEDLLNSRIKLGVEDIVYAHYFENAQEPVRKAIYQQKVAPKGQKPNFMTAE  
GIRKVQQGFFAFHVELSTGYKIIGEVFQEGEKCGLEIEYVNLIEPWLATQKKSPYKEVMK

IGMRKMHETGVQNREIRKIYTRKPQCHSGGSNFGSVGLIDCYSAFLTFGVGI AFAFLLFVM  
ELIVRRYFIRREKERLK-

>TcasIR75s

IVLPMINDLIEHFNKTQIILAYLCDKNGTNLLLRNNNTNFRRLSGSEPLFXKKLYQVNVL  
SPNSRDMPYPTPPAFLTYVLDAGCSNTKQLLLLVPVITHXLIFGNNILKASEQKQFATPFKW  
IVYYNNPVELSFFIDEYFTKTNILVDSVTLATINPTSGTFDLNKIYKRKINGSIIHENIGIWGR  
GLGVTDTGYEKITYKRRRNLTKTVLKSCIVITNNDLSLNHLTDKRDHIDSIKVNYYVLVQH  
LSDTINASLEYSVRGTWGYKDNKSQWSGMIGELTRNEADIGGTALFLTSDRIRVIDYIAMI  
TPTRSKFIFRQPKLSYVANVFTLPFDASVWASVCGLLVIIAGLLYVVVRWEWKKKDYVQV  
VVFFAFWVDFPSSVFCRTNRTSRKFTILGSXVFITFGALCQQGSSSVPFSPGRITLIFLLVSL  
MFLYTSYSANIVALLQSSSSSIQTLQDILNSRLDVGVDNTVFNHFYFPNATEPIIRAIYQQK  
VAPPGQKPKFYPIEEGIRKMRQGLFAFHVETGPGYKVFSEIFREDEKCGLQEIQYLQVPDP  
WLAIQKNSSYKMKLVGLRLLQENGIQEREVGLIYTKKQPCLARGSSSISVGLVDCYPAA  
VVLAGGIGAALAVLILEIYVHQRFVGFLL-

>TcasIR8a

MVISENLDKTTANRLKAIRPIPNNFAIVATSSNMEELLQTALDENLVTLPERWNLVFLDFQY  
QQFDKKRLKNMPINLLHMDEEICCRFLQSEKCECPHDFNLQENFLSLATNTLAKILKTMTM  
ENLLRADLNCDDSRYSRTRFRYELLQEQVDSNDLVFKENFGLHVNINGVIETGDEKVAE  
YNYKTGVTVLDGKKVEPITPFFRIGITHALPWSYKETDSSGNTYWTGYCVDFTEELSKLM  
GFGYEFVEPKSGTFGKKRDGVWDGVVGDLATGETDLAITALIMTADREEVIDYVAPYFEQ  
TGITIVMRKPVRKTSLFKFMVTLKLEVWLSIVGALIVTGFMVWFLDKYSPYSARNKKAY  
PYPTREFTLKESFWFALTSFTPQGGGEAPKALSGRTLVAAYWLFVVLMLATFTANLAAFLT  
VERMQTPVQSLEQLAKQSRINYTVVKDSATHKYFINMKHAEDTLYRMWKELTLNASTDD  
TQYRVWDYPIREQYGHILLAINDSNPVANASEGFRIVNEHTDADFAFIHDSSEIKYEISKNC  
NLTEVGEVFAERPYAVAVQGGSHLQDEISKILNLQKDRFFEQLQAKYWNHSGKGCPTT  
DDNEGITLES LGGVFIATLFGALAMITLVGEVLYYRRKSKIQNSETKKPKTVQTSENWKT  
DTLMPVSLINKDKQSVTIGTEFKPVNRNRDLSEFGHITLYPRARNRITQTSNE-

>TcasIR25a

MASSSAIYRIAIYSRIATAHLNYSDFLNNVLTEHKMLKLVAFIFYCTNLANGQTTQINIVL  
FVNEEGLVAEKAVDVATNYIKKNNKLGVNADPVKVVGNRTDASGLLDSLCSYNEMIA  
NSMNPHLVLDTTMTGLASETVKSFTAALGLPTISASFGQEGDLRQWRNIDENEKEYLVQIS  
PPADVPEIIRSLVLSKNVTNAAILFDDSFVMDHKYKSLQNVATRHHVIAPIKEADKIGDQL  
RQLRKLDIVNFFILGSFENIKRVLDAADSVGFFNRKFSWHAITQDKGELKCNCRNATITLA  
KPLIDAQYQDRLGLIKTSYQLNAEPEIAAAFYFDLALYSFLAVKEMIADGVWKRNNATNYI  
TCDDFDGKNTPRRAGLNLKKYFSKEVSETPTYGPISIVSNGYSFMFTMQISAVGVRESSS  
DKSVPLGSWKAGYDNNLTLVDPQIMKNYTADVYRVVTVEQKPFIIKDETAPKGYKGYCI  
DLIQRISEILNFDYEITPVGDQKFGNMDENGKWNGVVRELMEKRADIGLGSMSVMAERE  
NVIDFTVPYYDLVGITILMKLPKTPTSLFKFLT VLENEVWLCILAAYFFTSFLMWVDRWS  
PYSYQNNREKYKDDEEKREFNLKECLWFCMTSLTPQGGGEAPKNLSGRLVAATWWLFGF  
IIASYTANLAAFLT VSRDLTPIESLDDLSKQYKIQYAPLNGSSTMTYFERMANIEAKFYEIW  
KDMSLNDLSEVERAKLAVWDYPVSDKYTKMWQAMKEAGLPNTLDEAVKRVKDSRSSS  
EGFAYLGDATDIRYLEITSCDLQMVGEEFSRKPYAIAVQQGSPLKDQFNAILQLNRRELE  
RLKEKWWSKNPEAKKCDKQEDQSDGISIQNIGGVFIVFVIGLACITLAFEYWWYKYRK  
GGKVVDVQAKHSDVATKINDGFHAKINKLYPRSRF-

>TcasIR144

MQVSKILLSSLLLNRDETSKCLDAIFKQPVVVLRGVPKNLQNFDAWKPETYLILAPNATV  
LEQMLEKWTSTIESFNPRAKFWLLTHWHEIKPKTLTILAKFYIVNVAIVTRTGQVFTYYPYK  
YENIAQPDTKPVLLGQCDNVPSFPDKLPKFWRNNTTVQVLTCKLLPYVDCSDLDQGLTQI  
FDLVQEFLKFKVRRIFDKSFKFLAKINGSYSASFRLQEREVDMAMGSFRSVGSTQFRDF  
EFSTNHMEDKLVVVPKARPMVHWVRLVKIFEPSFWGLLVVLTVMARVFEKMARFTD  
EPMGIYRKSGFRVAVLILIGSYLKKTPKRFEMRIIFIFWIYFCMVLNIVFNSNLTNVFFGTFN  
TFQVNSFDDIISNLEMGLTDDVMHILSQEQNWPEITSTKVISSCAFGPAACLNRITFQRNLV  
CCWGERSIKFRMAKFYTTQVHYVDDHLLFFYLLFYFVKGYPIVPQISKMIVQLKSAGFVQ  
FIKSKVDKLEPRQGNELTTKILTLKRLEGPFYFLLVGVVGGIMIFGYEVVTYERKRRKKVR  
QEVTKILKKKKMRQNEKVKILEI-

>TcasIR41a.1

TKMLFNNFCINILVNFIIINNYHKNSRCLLIFTDGDYKGEIPTVRIKATNGSFNSYLIFNYH  
GCQSVIIYTSNVTALLIKFETEIRLKMERFNERKFLIVPQNPSDFDKFFNLKQLYFISDLLLL  
LPTHNDTIFDLKTHKYVGVIDNNEPVLLDRWFSQNSFLFGKNLYPNKLQNQLGRPLKM  
ATFTYEPYSIIGNVFEQFFENDFILQGKSVGEHHGSELMSAVQFALKYNMTPVPVINEKDY  
WGDIFPNWSGNLLGNLVDDKADVGFSAlyTWEFCYHFLELSKPLVRTGITCLVPAPKLS  
ERWLTPLFSYSSYLWFCIILTLVIAIFVLSLVFCYNHNKTLNLNYPLKRKTTYIHFLESAVTI  
VLKPVFQQSLTLRELPIEIASKLLMGLVLLLALFLTSSYGSGLATVMTIPTYENAINTVEDFA  
NSGLDWGATQDAWIMSIQNAEEQRYVKIVSKFHPISEEELFQFSKSGKFGFSIERLPFEDYA  
IGDYIKEDVIDNFHLMKEDLYWEQCVIMLRKNSVLLPALDLFILKIFEAGLISHWQNEAVD  
LYMNPKVQRAVKFYRQGQEHVVKLQWSHVKGPFALLLIGLCISFIIFILELTLKKRNQF-

>TcasIR41a.2

TLGCLTMTNLNVLLQILLKTYFLNTRCIFLFTDSTIDLQVETPIVYFKVSNTLNPSLIFQHHG  
CQNILIHENASDIFVQFENLIRLNNERFNERKYIVTGHNSLKILLTKQLEYVSDLLLVPK  
QTGHYELITHVYRHQNRSKINEPVLLDVWYSQNHFRQENDLFPNKLNTQNQRVLKIGTL  
SYEPYSVIGKLTVNXPYYLNLGKDDYSFDGTETSLVYEFVHKYNLTPSFTIMGDDLWGD  
VYANWTGIGLFGSVLNDEIDIGYAAVYTWEEYKFM DYTKTLIRSGVTCLVPAPQLAAGW  
VTPLRSFSLGMWIALVIVLLSNTIVLNLFYRNQKYHXNQLFQILLFNAFSKRFFIDSLTTAI  
KLYVQQPLTLTLKRGLLKYFIVTNMIMVLFISSYSSGLSSVMTVPRYGKSIQTVKDLASSH  
LNWTGTTDAWIFSLRQVEEANYENIKNRFFVVKQNDLVTASKQYNFGFSVERLPYGHYA  
VGPYIQRDVICNYRIMQEDLYWGQCTFLLRKNVLLPLLDKILRVFEAGLEAYWENQVK  
CFGRKNMNLRFGLCLPIHGHVCPKRHYVLYTTYXEHDTIKLTWEHVEGAFVAVLVGYA  
ASIFTFVIELILDKVRS-

>TcasIR68a

MIKNLLPYKCVVLISDDIYGGTFTKSWYRRFGPFITFVIRVDEYEDLLSPFEETQACLDTA  
KNEGCQMYLILLSNALQVSRLRFGDKYRVINTRAKFVLLYDNRLFDKPLFYLWKRIINVI  
FIRRYSGQKSDTKKNMPWYEITVPFPTQITSILIPRRLDIWTKSKFRKGIDLFRDKTSDLRN  
QTLKVAAFSHIPGTTKSLQEK TARTVIGNFSGTEVEILQTVSAAMNFHCELYEPVNVVDVL  
WGGKQSSGKYTGLVGEMVSTNADIALGDLYTPYILDMDLSIPYNTECLTFLTPESLTDN  
SWKTLILPFKYFRPAMWA AVLVCLLICGAVFHALARFHETISQNKSVLEIHTKRKKIILSI  
CPEIEKLDNLKYTKMREQYKPPRFEGQSIGLYQFSEPFNSVLYTYSMLLLVSLPKLPTGWS  
LRMLTGWYWLYCLLLV VAYRASMTAILARPTPRVTIDTLQELVNSRLKCGGWGEINRQFF  
KSSLDPITKLIGENFELVND SNEAVDRVAQGVFAFYENSYYLKEALVKRQLRFQIARTTQN



QSEREMRDIAREDRLHIMTDCVIKMPISIGLQKNSPIKPRVDKYIRRVLEAGLIKKWLQD  
VMASILNAEVQSTQEEMKAIMNMKKFFGAIVALFIGYFISVVVLIVENYVFHFFVKRNPY  
NKYTRSIHHVKKAE-

>TcasIR100l

MPRKLFLWIFFLLVSCYGNLSETHLQFLKRYFVSANSVAISMLQTHHQEVKIRDLAEVISR  
KLNSIGTPVVVHENHKSGLNIIMIVWSLKILRQFLDSLVPPEEKGTYYIIILEQDCATVHSD  
FAQILEQFWCEHNVLVVVQNPCSGGTFYLFPLFEHRDNFWGSCKSWDFNEQMPNKLNRN  
LNQFPLKISLFLYNPTLIAKLPKGLKTNPRYHNLSASKGYGGLDGFLRELVDYFNFDPVIV  
ENLEEYGRVLPNGTAFGSLGDVVNQRVHFSINSRFLMDYGTKEIEYTFPYISDEICMLVPKS  
LKVPTWKTLLKCFNTLSWVLIFVSLCSTFAWYFVGPSKNLHKLWQIYCFIVGIPQKIEPS  
FSQFVFLLSCTFFNVITIFGIIQGSYFTEFATTSFYDPIDTLEELYESNLPVATHFWFLLDGDT  
DLMTKLKTHKIEATGDCLEQTARQRNIATLGRKSESDLIIRTKYTSRDGTPLVHIVEECHTS  
LYLCGIVPKGSHFLAPFNQIITRLEGGFTTKWYRDVFDGIIESEKPLDETVSFNSLNMND  
LQTAFHILTIGHLFSIMVLIGEVIKKGHNKLLT-

>TcasIR100

KVTIIILIMMCLSLPKIQTCPKINHLKEHFKQVKSARIMILQNEIIVTDWLIMELIKDNKITV  
TVQKAIRNFEPFNTSNLTRFEALEFNDTIPTLQTDSTCGHLIIVKNEERLYQYLKSDPGFLIL  
NPRHFYAIAMELFKTNVLEFWSLQVSNILLDCDTSYTVLPFNGTTIRINAYTQRKLLR  
NFHNYFLQVSMQPKPPTAIVKFPKPLRENPIYKDLVPPFDYAGLDGCLLKVLQRLNMKY  
VIVGNGQKYGTVLKNGTTTGLAWIASNKVQISTNGRFLMTYGTNKLEFTVPYSSDQVC  
AVVPKALKIPKIIMLAKSLTPSSWFMIFLIYVICVLIYTLMGSTGSTWTLYAIFHGFPVKIVPT  
SRQSFFLTSCMLFSIIIMTIIEGSFFKTFTTTTTYYKDINTLEELDESELPIAETFFSFTNDKSRIM  
TSLKRKKLVINRDDILEQVARKRNIKLERKRDIKVRLEKTEFLDEEGESRLHVVEECFTTF  
YIGFIVPKNSIFLPTFNNVIRRFESGLTQKWYGDVEFSIFLEKIFKLENNIKHHSFSFDNIVSA  
LCVLFIGLSLALLVFFWEVTKXKQITLIYVSLIYCIISRH-

>TcasIR100j

LTLVQVVICLLEVSHYDNEKFNVDYQHFTLVRYLTLTFLNDGVHRIDLNNLVVDLMSRLN  
FSMMIKEKRLGKNSTTFQESDPFQGHIMVVYDVKVLLAFLEESTEVPKARGSFALFTSL  
KCPHYETNHALKQLWTNHGTANLIAFCDNIVYHPFSKNDSTWGATLDYSPATETPNLF  
RNFNGYLLRVSLFKRPPTALKQVPSYISNPIYRDLKPGDFAGLDGTLRFLSNYLNFTVVI  
DESHPTHGRVLKNGTITGSLSDVVS HRVDFSANDWFLIDYQTPEIEPTVPFSYDQVCPVVS  
KALKVPQWKAFFIFDLTSWVLIFFMWLCCVFVWHVLPFRDLSTIWEICSVLFGNPVNV  
VPLSNQHMFGLGSCMVLNIIIMGIIQGSVFTDFTTTTFHKDINTLEELDEAGLKIASSAWYLD  
FDTTDLIKRLKTKQIRNYIGSYKDTAFKRGMAVLGRKQDVEHMKVEFVAEDGSPLLHVT  
SECLQTFLVSLFPGSPFLPTFNNVITRLEAGLTVKWYQDVTSTGTMLQQMKNFANRRP  
TGLFSLNDAKLAFYALFVGYIASFVTFLEILTKNHHNNVHNHVDVLKAQHGGVQVQVDQ-

>TcasIR100n

DTFWIVYQTHFLLDYTLHILETEDHKFELRQFTQNILKRVNKGYSVFLSVRITKSSLNKRN  
KSYHFPSTAYAPSQNLAKLSDDQEFYKAKRLSTDSKHGFALIVWDLTTLHLFLDQDYRTIV  
PEGRGTYAIQVVSQKQCDVKNEIAFTLQRLWTEYQVINVVAQTPCSCDKTHIFYHPFVKRE  
GFWGLATSHTLQIKGDSRLISNTLSDFNGFPLRISIFPRTPTAMQTLPKLLHYNPIYRNLTW  
SKGFAGLDGLVATLAEYFNFEVVLVGSLEDDFGKVLPNGTTVGLADITERRAVYNAN  
ERLVAYFNLDQIDFTVPYTREDICLVVPKAAKIPKWILFQSLDPQSWCFTLFAYVSCFMF  
WYNIGPSRSLPKVSWQMFSSFLGIPTKSFARKLDQVFLFLPCMIFSVVMLGVVQGSFFTKL

TLFSFYQDVNTLEEMADLELPIGAFIWNLIRDDSDVIRRLKSKSVKPPDNIFDMIAAHRNIA  
TIETRARAQLLIGSKYVDDDDGFLLHIVNECLTTFLNANIVPKGSALLTVFNAVLGKLFESG  
LTRKWNNDVVDSLIAEKMISVNRKRVRTKSFSLYDAQGAFFVILVGYACSVFVFLCEIVLK  
XDKICYLALIINKT-

>TcasIR100e

DDFWRVTKNHFLVNSLTIQVLQTEEHQYDLNQYTVTLLKRLNSLNLVLRMMEKFLSG  
RNFPKHSVTNHTFSTTKPKFDPIGGEELTQLKRLSSDSSKGYFIVIWDVESLHNFLDEDFQV  
VVPEARAXYMIHFAFTYSTEACKIVKLQVSSVLRWLWIDNNVFNIIAQTSCLCDLEVYVHR  
PFVKRGGFWGLTNSYQMSEIVENPRIIANPLINFNQFPLKIGIFPRPPTVIETLPKLLTDSPIY  
KNLSFSKGFAGVDGLVLGTLAECLNFDTTVITSKPNISYGYIYKNGTATGAIADVIDRRMVF  
SANSRFLLIYNTDQLEFTVPYTAEKMCLAVPKALKVYKWSSMFRFCFNKLTWVSIICSGIC  
TIFWYLLKWQKLV TALATIAQFLLGVPANVRPNVPQMLFLNSCMGFNIVIMGIIQGFLFQS  
FTTTSFYPDINTIEEMVDSSELPLRSSIFYFLRIDNSSLIHKLKSRTMAAPPNVYDLVAFHRNIA  
TTDIKSHVDFMVRSLYDEDEGWPLIHTVDECDEFFLIANIVPKGS AFLTVFN NVITKLEGG  
LTQKWYEDVINSILENWINLNRNKS KTHAFSLYDLQVAFYVIIMGCAVAILVFAEIVHKR  
RNXNNCCNNHHKNIIFAA-

>TcasIR100f

DDFWVIFSTHFLATSLTFITVQTNQYDLRLLAQAIISMDKQVMTRRHVILHNYAEN  
INFNVVFKTGTKKNARDFVTDLLAKTKKLASDSREGFVIITWNVNVLQKFLAQHISEINPR  
TRATYLFILISSSDSLR KIKHCLHFLWHKYDILNIVVHVLGCGTTTTLIYRPFCKTKNSWGEI  
TAHQIEEIVQQPLLLTNSLQDLNQYPLQVSLFARDPTALTQLPKLLQNNPIYKNLASFYGLD  
GSMLSTMAKILNFEVVIVENHDRLPFGRVWPNGTASGTLGDVNNRRVALSSNSRILADYN  
TQEIEFTVAYNGDSICVAVPKSLKVPKWRVLFECFDAASWLLTSLVFIVCLCFWYCVALKN  
FARILWDVYSFLMGIPTRIVPSRQYFFLSSCMVFNVIILQLLQGWLFATAFTKTVFYPDLDLTL  
EVLEKTNLPVATNMWFLFKDNSEVIQKLSRRGIGKTPNSLDLVAYSARNICVLDKRQDLELY  
SQAQFVGPDGLSLLHIVNQCLTSVLLNIVPKGSPFLPVFNDIMSRLFESGFTKKWYSVV  
TSRVTEKMVSLGRKERNFSFKIKDLQAAFYVMMAGCVFSLFVFGELVTHXVFMNKSS  
QSKSHRFLNCNYGV-

>TcasIR100g

TLFKIAEVTFFMVTMHEEFLSLLFGNYYHTNLYQTVKIQEKFARTNNKTGAWYENVALDQ  
KLDPPIDQNWQRVKLRSDSFEGFIIIVWDPQTLQFLNQNFSLVPRARATYFLLFVFSIY  
ENCKLVNHILKRFWSEFSVLNIIAQTPYCCNKVYIHRPFVKTNSWGVTSYTLTEVTQNL  
ALITNPLLDLNQFPLRIALFEKNPTAIRKLPKALQNNPIYRNLSRSKGFAGSDGFLLSAMVE  
YLNFDPLIDETLEPMNFGHVL PNGTVCGVLAEVVHKRTDYAGNCRMLTYFGTDGYEFTA  
PYSSEKIAMVVV PKAGKVPWRSLFNCFNALSWSLIFSAIVSTVFWCFLRRSQHLKRASWE  
MFAHFVGI PCRVVPSRGQFMFLTACMMFNIIILGIIQGSFFTDFTTTSYYPDLNTLEQVLDN  
LPIMAFARLLRTNSSPILQKLEQRSIPYEDNVYELVALYRNVAALDRRLDLELEIKTKYSG  
RDGVSPLHIVDES LVTFLTSLV PKGSPFLVFNHVIRSMFEAGLTAKWYDDVVTSIIIEHK  
HKTPSFGVKYRPFTLQDVQAAFYVIAFGYSCSVFVFWCEIIVKFSKGKIKHFHYFVLI-

## 7.SNMPs

>ApisSNMP1

MLNKKILESLSLNPRSNMRQMWSHPPLSADFKIYLFNVTNPIEAQKGEKVIIKEIGPYVYH  
EWKEKENLIDDIDADTVFEFSKNTFVFDDEMSTLPLTGDEIIVMPHLAMIGMVTMTKMMKP  
AALGLVNKAIPYLYPDQTSAFMMGTANDIMWNGLDINCTSEEFASVAICSQIRQNSLHK  
ISKDHFKFSLFGVKNGTIESNRYTVKRGYTPATEVGVQVIRFNDKHKMDVGPATSATRYTG  
QTPQYFNRSSRRTPTWPSFSGDICRSLTPDYVQETKYNGLNVEYSAMLVKPEEKCYCLN  
KKKCLKPGALDLTNCSGAPIIATLPHFYKSEYLNNDGLSPQVEKHKIQMYFEPMTGTPL  
LGYKRLQFNIFLKRESKINVMKTLNEDEKLIPLFWVEEGIALNKTWTNQIKNKLYLPITIM  
KYVKYIFVVFGIVFIILAVVVNYNSVKTMEITPKY-

>AaegSNMP1

MLIKNRKNLMLKPGTQMRGMFEKIPFPLDFKLYLFHVTNPDPVVMKGGKPHVREIGPYFFE  
EWKEYDTPVDNEEDTLTFTLKNWIFRPDLTKPLTGDEMITIPHPLILGALLMVQRDREA  
MMPLVSKGMDIIMNPLTTGFLTTRVMDLLFDGILIDCSSQEFSKALCSGLESEGAVMPFN  
ETHFKFSMFGLKNGTDAGRWWVYRGVKNIMDLGRVVSFNDETEMIDIYDGDENRYIGT  
DSTIFPPFLTTKDKLWAWSPICRSIGAEYGGKSKYAGLPMSFFKLDGFDARNEPEHHCFCR  
DPPDICPPKGTIDLAPCLGAPIIGSKPHFYDSDPKLLAAVDGLTPNEKDHDVYIHFQLLSGTP  
VSAAKRLMFSMEIEPIRDHAVLGNLPTVILPLFWAEEGASLNKTWTNQLKYTLFLGLRFNT  
AVKWLTHIIGTIGTIVGGFMHYKRTTKTVNVPVQSVNGSSAKGNGAGMTVVGHQPDSKG  
GSVTPVIPSAKDLLQNSRNLPVIEGLDRPQKVTVTEMQERY\*-

>AaegSNMP2

MMVMNTELQRDTPQFKRWEAVPQPLDFKVYIFNVTNPYEVQMGRPRVVEVGPYVYFQ  
YCHKDNIRFSRDRSKVHFSQQQMYVFDAESSYPLTENDQLTVLNMHMNSILQIIDTQAKE  
TITNFRSDVNNTLEKIPVVRVIKRIEKTTPIQSILQLAEDETYDSLRLINAELNRIFGRPDSM  
FLRTTPREFLFEGVPFCVNVIGIAKAICKEIEKRNTKTIRVQPDGSMKFSFFNHKNMTNDGT  
YTINTGIKEPALTQMIEYWNGRNTLDRWINQSAGSSSKCNKIVGTDGSGYPPFREGVERMT  
IFSSDICRTVDIKYVGSSYEGIPALRFETDSHFLNEIGPEYGNDCYCVNRIPKAIVKNNGL  
YKGALDLSTCFDAPVVLTHPHMMGAAQEYTSIDGLYDPPEKHQIFVDVEPLTGTPLNGG  
KRVQFNMFLRRIDSIRLTDRLQTTLFPVLWIEEGIALNEDMVKLIDDSLMKVLTLDDIVQW  
VMIGSGLLLAIIMPVYFIKRPSSGSITPTLTTTTSTVSISDGGGLGGNPQK\*-

>AcorSNMP1

MQFHARLALASGIILTCITIFGWVAFPNLIKSKIKTGVTLKPGSQLREMYMKIPFPIFYIYVF  
NITNPNEIARGQTPIVQEVGPYEFEEWRSKDFVSENEDDDTMTFYSKETFIFKPGTLNGNE  
VLTIPHPLIVAILLTVMRDKPSASNLINKAMNSIFRNPAHPFLTATFREIFFDGVIVNCSVTDF  
AGKAVCTQLKTEGAKDFQFIEENVFKFSLLGTNGTASNKFKVGRGLKDYRQTMVVE  
WNDLTELTTWTTKECNQIKGTEGTVFPGLIPHGSDIPSFAAMLCSMAAKYLGDSKYDGIP  
VSRYTLDGFDQSSNEEDKCYCPAPDECMKKGALDLRKCSGPVVATMPHFYNSDPSYVNG  
VKGVNPDKAKHELYLLFNTFTGSPVAARNRLQFSMPFVPMKVDVMKNVPNTLIPMFVW  
EEALDLNKTLTKPLRTMYTTMKVVRIISWILLGTIGGLGYAGFLYKRSREIQITPVKKDK  
KDNAISTVMSKSADDKGGVSNPAVSDNEIDKY-

>AgamSNMP1

MELKERNFKKIGLICVAVLLCGMVFSYGIFPSILRFMIKQNVLLKPGTQIRDMFEKIPFPLDF  
KLHIFNVTNPDEIMRGGKPRVNDIGPLYFEEWKEYDTPVDNVEEDTLTFTLRNTWIFRPDL  
SALTGEEIVTIPHPLIMGVLLMVQRDREAMMPLVKKGVNILDPLESAFLKVRIMDLLFDG  
IYVDCSSQDFAAKALCSGMDSEGAVMPHNETHYKFSFFGMRNHTEAGRWWVYRGVKN

RDLGRVVSYNEETEMDIWDGDECNQYIGTDSIFPPFLTAQDRLWAWSPEICRSLGAHYVH  
KSKYAGLPMSYFELDFGDLKNEPHNHCFCRDAPDDCPPKGTMDLSPCLGGPIIGSKPHFY  
GADPKLVEAVDGLAPNKAHDVYIHFELASICWVSPVSAKRLQFSMELGPIRDHELFGQ  
LPDVILPMFWAEEGASLNKTWTNQLKYQLFLGLKFNATVKWLTIIIGTVGAVGSAYMYFR  
KETKTDDVAPVDVSTPDTNPSSAKDGVVNVSLGRNLPPVIDGLDKPPKLRATELQQERY\*-

>AgamSNMP2

ATELRQGTQYKRWEALPQPLDFKVYIFNVTNPYEVMQGRRPKVVEVGPYVYFQYRQK  
DNVRFSDRSKVVHFSQQQMYVFDAESSYPLTENDELTVLNMHMNSILQIIDNQAKETITNF  
RSDVNNTLEKIPVVRVIKRIIERTTPIQSILQIAEDETYSRLINVELNRIFGRPDTMFLRTP  
KQFLFDGVPFCVNVIGIAKAICKEIEKRNTKTIRTMPDGLRFSFFSHKNMTDDGMFTINTG  
IKDPSRTQMIELWNGRRTLDVWNNRSSLSSCNKIHGTDGSGYPPFRTGVERMTIFSTDIC  
RTVDIKLTGSSSYEGIPALRYEIDNNFLHEIGPEYGNDYCVNKIPKSIVKSNGLYKGLD  
LSNCFDAPVVLTLPHMLGVAEEYTALIDGMDPEPERHQIFVDVEPYTGTPLNKGKRVQFN  
MFLRRIDAIKLTDRLQPTLFPVIWIDEGIALNEDMVKLIDDSLMKVLSLLDVQWVWLVIGVG  
LLLAVLMPTVYFVKRCRGEGRSRTVSPAVTATTSAAASLSTVAGVTGDRSK-

>AmelSNMP1

MRFKKLIHDITTRFFHRGVHVLHSSFVKLQSFVTTGRKLHETLRVPVGRKCVTMKPKKL  
GIIGGSLLAFGILICAIAFPFLRSQVKKQIALKDGSEMRELWSNFPVPLDFKIYLFNVTNPM  
EITAGEKPILEEVGPFYDEYKQKVDLVDREEDDSLEYNLKWATWFFNPSRSEGLTGEEELIV  
PHVLILSMIKLTLQQAAMGILNKAVDNIFKPKESVFRVAKAREILFDGLPVDCTGKDFAS  
SAICSVLKEKDDALIADGPGRYLFSLFGPKNGTVLPERIRVLRGIKNYKDVGVKTEVNGKT  
KLDIWGEGDCNEFNGTDSIFAPLLTEQDDIVSFAPDICRSMGARFDSYTKVKGINTYHYK  
ADLGDMSHPEEKCFPCSPDSCLTKNLMDLTKCVGAPLIASLPHLLGAEKEYLKMVDGLH  
PNEEEHGIAMDFEPMTATPLSAHKRLQFNLYLHKVAKFKLMKNFPECLFPIFWVEEGILLG  
DEFVKKLKTVFKTISIVGFMKWFTIVSGTCVSGAAAALFFKNKDKNKLDITKVTPQKGE  
KKWPNQMTISTIQAAPVPPNLDAD-

>AmelSNMP2

MWSYQVCAIICVIFGIYACITNLFSDGLFSIKNAILKNLPLIKGKDMYDEWILPVNLIFKCYF  
FNVTNPDEVMEGNNPNLVEYGPFTYREVFQKQIVDVEELDEIYDVKSTFTFDKYASLNI  
SKRDTVTILNPAYIGTISMLTTLPPSYIEKFGNNIPKLFNRSIFLKANPKEILFDGKVLTCN  
ERKFPELSTICKTLKALRSPVLKEGEKEGVYYSIFQRVNGTIRGRFSVNRGVNINSELGNI  
GSYNGRRVQTIWRTEKCNVVRGSDTITWAPLINMPSVLSFIPDLCRSIEADYDKEVSIYGL  
IGSRFVMRERTWFLNQSQCCLERNKVPNCLPQGLIDVSDCLKVPIIMSEPHFLHGDPQLL  
MYALGLNPSEDLHETFIVIEPYTGTPLSGQKKIQLNLKLERQPVDLLSNISEGYFLLWCAN  
VRIFSKIIKLQY-

>BmorSNMP1

MQLAKPLKYAAISGIVAFVGLMFGWVIFPAILKSQLKEMALSCKTDVRKMWEKIPFALD  
FKIYLFNYTNAEDVQKGAIVPKEVGPYFEEWKEKVEVEENEGNDTINYKKIDVFLFKPE  
LSGPGLTGEEVIVMPNIFMMAMALTYREKPAMLNVAKAINGIFDPSDVFMRVKALDI  
LFRGIIINCDRTEFAPKAACCTTIKKEAPNGIVFEPNNQLRFSLFGVRNNSVDPHVVTVCRGV  
QNVMDVGRVVAIDGKTKMNVWRDSCNEYQGTGTVFPPFLTHKDRLQSFSGDLCRSFKP  
WFQKKTSYNGIKTNRVANIGDFANDPELQCYCDSPDKCPPKGLMDLYKCIKAPMFVSM  
PHYLEGDPPELLKNVKGLNPNAKEHGIEIDFEPISGTPMVAKQRIQFNIQLLKSEKMDLLKD  
LPGTIVPLFWIEGLSLNKTfVKMLKSQLFIPKRVSVVCWCMISFGSLGVIAAVIFHFKGD

IMHLAVAGDNSVSKIKPENDENKEVGVMGQNQEPAKVM\*-

>BmorSNMP2

MLAKYTKTIFSVSVAFLVVSIVLATWGFPKIIRKQIQKNVQISNTSKMYDKWVKLPMPLDF  
KIYVFNVTNRDAINQGEKPNLKEIGPYVYKQYREKIILGYGDNDTIKYNLKKTFVFDPAV  
GDLREDELTVINFSYMAAIIISVQEMMPAAVGMINRALEQFFTNLDPFQTVKVKDLFFDG  
LFLNCEGDNTALGLICGKIRAEKPPTMRISKSANGFYFSMFHMRNRTVSGPYEMVRGTEN  
LSDLGHVISYQGKRIMSAWDDQYCGQLNGTDSTIFPPLEDGNIPEKLYTFEPDICRSLFASL  
VGKDTLNFNISTY YEEISDMLGSKSANPDNKCFC KrngsvkhdgcllmgvlnlapcggAPAIASLPHF  
YLGSEDELADFFGDGKIPDKEKHNTYVHLD PITGVVVIKGVKRLQFNIELRNVPSPQLKEVP  
SGLFPLLWIEEGAEIPEWLRKEIMDSHTMLWYVDAARWLVLAVAVVAVLVSATLVARSAAL  
IPWPRNSNSISFILGNSVNTSKVHS\*-

>CbowSNMP1

MRFPVKLAIGSISAFIFILVGFVLFPRMITSKVKGMVNLAPGNEIRDMFIKVPFALSFKIYLF  
NVTNPMEIQSGEKPIVKEVGPFCYEEWKEKMNIEDKEEDDTISYNQKDTYLLKKWWPGCR  
NGQEEVTIPHPLILGIVNTVARQKPGALSLINKAIKSIYSDPSSIFLTAKVDDILFDGVVINCN  
VSDFAGKALCGQLRTAEALTKVGEVEKFSLSKSNATLQKRIKAYRGKKNHRDVGRIVEY  
NSSKMMDVWPTEECNSIEGTDGTIFPPLTKPGEGLFMFSPDLCRSLIAFFVRKSTYDGIPCG  
EFTADLGDMSKNEKEKCYCSTPETCLKKGMMDLYKCSGPIYASFPHFYNSDTSYLKGVG  
GLSPNKTKEIKILFESITGSPLYARKRLQFSMPLESTQKVELFKNFTGTVLPIFWIEEGVGL  
NRTYTGQLKSLFTLTKVVKVSKWLILIGSLGGLAAAGYLFFKVDGRADITPVHEIRRHESK  
SGSTVNGAGGHVLSGNLEKY-

>CbowSNMP2

MKMFASRFCNVKILFVTTVVATVVLIGVLLLSFVGMPLIVNDQLAKKLRLENTEQWD  
RFVELPVPLNLNVFVFNVTNSDEV TNNKATPILQEIGPYCYEERITRKILSANSTEDSITYEQ  
SFNITFDEKRSGQWKESDKIVMVNPLFLILSQITNVIERFVVMGCIDKLFPPKYSTMFFEVD  
IKTIMLEGIEFGVASDDIGPACNIVRNKLEKTLPMKNVERIPSPTDPSVINSLKFAFLQYKIR  
GPDGQYTTNRGIDDITQLGHIMRWDHSAEIDVWGRGESTNNATCKEVKGSdstiYPPHVT  
KSTKLDIFSTDICRTVQIRYKGTGTYYGDSGYFGIDENTFRPATSPENDCYCIQQTMAPD  
GEPSCFLDGVVDVYPCFGAPILLSFPHFYADESYLDGVIGIDPPNSSIHEIFLLIEPNTGTPL  
QGMKRIQLNVVLRPVEFVEYTANLPSTVLPLIIEEGVNLSQDLLDKLDMYFNVIKAAD  
AAKYAAIGVLTAFVLISGGFFVRKRYFK-

>CbowSNMP3

MKFYSVLFVVKDRANMLNKFNITVSGKIIIVILGVFGLFCIFAGFYVGFKAVPDVITDKIWD  
MKVLKENTEQWGMFMKTPFPFTFKVYLFVQNPQEILQGAKPVLRETGPFVYKVKWK  
SEVEWDTDDISYFSYMRFEFDRKASGIFSEDMKVTLFNTAYYGMLQKIDETQPEVLSTVE  
GVLPSIFGENHGLFIKVKVDYLFGLKICENEGKDGGFVAGMVCKQMIARLPESKNLRL  
EDNSILFSNMHYKNNTHQGRFTVKSQQNRTEATLTLFNGKSYISSWTGEKSMCNKIRG  
ATTVPVNIENMTFEAYSIEDICRTIPLEYSAEETVKDIVGYKFSAMNDSFSSTKKNFCYC  
TNTTRTLTLDGEYGCLKDGVTDLKTCIGSSILVSFPHLLYGDEEYLDVIGLNPEKSKHETTVI  
LEPISGFPLSVTQRIQFNTFLRPIDNVISLENVSKSLFPLLWVEESLILDDQYTDMLKNELFR  
TIKIVDIVKVVITIGSGAACVLIALILRMSKTT-

>CbowSNMP4

MRLPLKLG VAGFLILLSVIVGFIALNPVRFGRQQTALKRKSEIRNIYKLPFPLDFRVYFF  
NISNPMEVQKGATPILTEIGPYCYDEFKEKIDVLDNDAEDSLTYYPYDIYKFNAEKSGKLS

TDYVTILHPALVGMVNQATRDSPALLSIVNKAIGPIFRDPESIYLTAKVKDILFDGVELNCK  
VTEFAAKAVCTQIKSQIPGIKSDPEKSIFLFSLLGVKNATVGKSIKVSREGISNSRDLGKVFLEF  
DGKKVLKLWYEEQCNHFKGTGDGWIIPLLKPEEGLWSFSADLCRNVVAEYVEDSVTKGV  
KTRRYEATLADMQNNEEDKCYCPTPKTCLRKGVFDLSKCMGVPIALPHFLEADEIYLQ  
QVKGLNPILDKHIIRIQLEPMTGTPIEARKRLQFNLPVSASEKITLMRNVSTSLHPIFWIEEG  
VELDGALLEKVTEVFTFLGVFQVFRWLGLLIGFVSIAYAVYHHMKHSRSVHITPISGSSSSD  
HVDINRSTNELVGKMKKEVFQSDKGHTNPVMTGHEFDYS-

>CquiSNMP1a

MVVGLTVSMAILPELVNMLRQNLRLKPGSDLRKMVEKVPFGLDFKVHIFNITNPQEIMQ  
GGRPRVKDIGPFYFEEWKEKYDIEDNDGEDTMTFDMKNTWIFRPDLTAPLTGNEMITVPY  
LLVIGVLLAIQRDKEAMPLPLISKGLDIIFEPLESAFVTVRVMDLLFDGIPVDCSSEEFAAKAL  
CSGLDSEGAVAPLNDTHVKFSMFGLRNGTSIGRFKVYRGIKNVADLGRVITYNDETEMDF  
YDGDECNKYVGTSTIFPPFLTKKDRLWAWSPERICSLGAVYAGKSSYQGFPSTFFTFIDFGD  
LRDDPVHQYCRDPPDGCPPKGTIDLGPCVGVAPILGSKPHFIGGDPKLLRDVDGLEPDPKE  
HDIFIHYDLQTGTPFSAAKRLQFNLELEPIRGHEVFGKLPKMVLPFWAEEGASLNKTWT  
KQLKPLFMIRKFNATVKWLSIVLGTGTIGAGFMHYKLHIKPVNVRPMEVQKTTVKEVEP  
SVETNGTGKEPPEKIEPRVVESAHRNLPPLFDGGLAGKQKPVPSDQRER\*-

>CquiSNMP1b

MKLEELNFKKIAIICACTLVGGLTFCYGIFFPILKFMLKQNVLLKPGTQMRGMFEKMPFPL  
DFKIHLFNVSNPEEIMKGGKPKIKDVGPYYFEEWKEKFDTEDDLEEDTSLFTLRNTWKFR  
PDLSSPLTGDEMITLPNMLLMGVFLMVQRERREAMMPLIRKGAIIIFDPLESAFMTVRVMD  
FLFDGLPVDCSSQDFASKALCSGMESEKVVLPNDTHYQFSIFGGRNATDAGRWWVYRG  
VKNIKDLGRIVSFNGETEMDTYDGDECNQFVGTSTIFPPFLTKEKDLWAWSPERICRSMGA  
TYGGKSKYAGMPMSYFELDFGDLKNEPENHCFCRDPPEDCPPKGTMDLAPCLGAPLLGS  
KPHFIDADPKLLEE VQGLEPNREDHDMFINFELISGTPVSAAKRLQFNLEMEPVRDHEVLG  
NLPNVILPVFWVQEGVSLNKTWTNQLKYQLFLGLKFNATVKWLTIIIIGTVGSIGAGIMHY  
KRSTKSVNTPVEAVSNGSGRIISVSSAGKDREAINNSKNLPAVLDGLGERIPKMAPVEQR  
Y\*-

>CquiSNMP1c

NVLLKPGTQMRWMFEKIPFPLDFKIHLFNVNTPDEVMMKGGKPKIRDVGPYYFEEWKEKF  
DTEDDLEEDTSLFTLRNTWIFRPDISAPLTGDEMITVPHLLVLGVFLSVQRDREEMMPLISS  
GMKIIIFDPLESAFMTVRVMDLLFDGIPVDCGSEEFAAKAVCSGMESEGAVAPLNETHVKFS  
MFGMRNATDAGRWWVYRGVKNIRDLGRIVSYNGEPEMDIYDGDECNQYIGTSTIFPPFL  
TKQDRLWAWAPEICRSLGAHYIGKSKYAGMPMSLFKLDGDLKNEPENHCFCRDPPEDCP  
PKGTMDLSMCIGVPILGSKPHLLDADPKLLEGVDGLEPNEAEHDVFIHFELLSGTPVSGAK  
KLQLNLEVEPIRDHEVLGNLPTVVLPMIWEVSLNKTWTNQLKYQLFLGLKFNATVK  
WLTIIVGTLSIGAGFMHYKRTSQVTQVEQVAAGAKSEGGRFISVSAATTEEGKNGGGG  
NLPVLDGLDPSGISKRMSDPAQKERY\*-

>CquiSNMP2

MKARNLNPPAPSQGGKLIKGVLCSSPWVKAKAGCGAARLAKDNTEL RQGTPQFKRFEA  
LPQPLDFKVFIFNVNTPYEVQMGRPRVVEVGPYIYFQYRQKDNIRFSRDRSKVHFSQQQ  
LYVFDAESSYPLTENDPLMVLNMHMNSILQIIDNQAKETITNFRSDVNNLEKIPIVRVIKRI  
IEKTTPIQSILQIAEDETYSRLINVELNRIFGRPDSMFLRTPKEFLFDGVPFCVNVIGIAK  
AICKEIEKRNTKTIRVLPDGSMSKFSFFNHKNMTEDEGIYTINTGVKNALETQMIEFWNGKN

MLDKWSNSSRGSSMTCNKIEGTDGSGYPPFREGVQRMTIFSSDICRTVDIKYVGSSSYEGI  
PAARYVTDDNFLNKIGPEHNND CYCVNRIPKAIVKANGCLYEGALDLSTCFDAPVVLTLPL  
HMMGAAEEY TSLIDGMHPDPEKHQIFVDVEPLTGTPLNGGKRVQFNMFLRRIDSIRLTDRL  
LPTTLFPVLWIEEGIALNEDMVKLIDDSLMKILTILDIVQWTMIAIGLFLAISMPILYFTKRRP  
SSGTITPTLTTTTSAASIPERGGLGGNPK\*

>DmelSNMP1

MQVPRVKLLMGSGAMFVFAIYGWVIFPKILKFMISKQVTLKPGSDVRELWSNTPFPLHFY  
IYVFNVTNPDEVSEGA KPRLQEVGPFVFEWWDKYDLEDDVVEDTVSFTMRNTFIFNPKE  
SLPLTGEEIILPHPIMLPGGISVQREKAAMMELVSKGLSIVFPDAKAFKAKFMDLFFRGI  
NVDCSSEEFSAKALCTVFYTG EIKQAKQVNQTHFLFSFMGQANHS DSGRFTVCRGVKNN  
KKLGKVVKFADEPEQDIWPDGECNTFVGT DSTVFAPGLKKEDGLWAFTPDLCRSLGAYY  
QHKSSYHGMPSMRYTLDLGDIRADEKLHCFCEDPEDLDTCPPKGT MNLAACVGGPLMAS  
MPHFYLGDPKLVADVDGLNPNEKDHAVYIDFELMSGTPFQA AKRLQFNLDMEPVEGIEP  
MKNLPKLILPMFWVEEGVQLNKTYTNLVKYTLFLGLKINSVLRWSLITFSLVGLMFSAYLF  
YHKSDSLDINSILKDN NKVDDVASTKEPLSANPKQSSTVHPVQLPNTLIPGTNPATNPATH  
HKMEHRERY-

>DmelSNMP2

MIHWSLIVSALGVCVAVLGGYCGWILFPNMVHKKVEQSVVIQDGSEQFKRFVNLQPPLNF  
KVYIFNVTNSDRIQQGAIPVEEIGPYVYKQFRQKKVKHFSRDGSKISYVQNVHFDFAVA  
SAPYTQDDRIVALNMHMNAFLQVFEREITDIFQGFANRLNSRLNQTPGVRVLKRLMERIR  
GKRKSVLQISENDPGLALLVHLNANLKA VFNDRSMFVSTSVREYLF DGVRF CINPQGIA  
KAICNQIKESGSKTIREKSDGSLAFSFFGHKNGSGHEVYEVHTGKGDPMRVLEIQKLDDSH  
NLQVWLNASSEGETSVCNQINGTDASAYPPFRQRGDSMYIFSADICRSVQLFYQTDIQQ  
GIPGYRYSIGENFINDIGPEHDNECFVDKLANVIKRKNGCLYAGALDLTTCLDAPVILTLP  
HMLGASNEYRKMIRGLKPD AKKHQTFVDVQSLTGTPLQGGKRVQFNMFLKSINRIGITEN  
LPTVLMPAIWVEEGIQLNGEMVAFFKKKLINTLKT LNIVHWATLCGGIGVAVACLIYYIYQR  
GRVVEPPVK-

>HarmSNMP1

MQLPRELK YAAIAGGVALFGLIFGWVLFPTILKSQLKKEMALS KKT DV RKMWEKIPFALD  
FKVYIFNFTNAEEVQKGATPILKEIGPYHFDEWKEKVEVEDHEEDDTITYKKRDVYFNPE  
MSAPGLTGEEIVVIPHFMLGMALT VARDKPAMLN MVGKAMNGIFDDPPDIFLRVKALDIL  
FRGMIINCARTEFAPKATCTALKKEGVSGLVLEPNNQFRFSIFGTRNNTIDPHVITVKRGITN  
VMDVGQVVAVDVGKTEQTIWRDTCNEFQGT DGTVPFPFVPETERIESFSTDL CRTFKPWYQ  
KKT SYRGIKT NRYIANIGDFANDPELNCYCAKPDTCPPKGLMDLAPCMKAPMYASMPHFL  
DSDPALLSKVKGLNPDVTQH GIEIDYEPITGTPMVAKQRIQFNIQLLKTDKLDFKDLSDI  
VPLFWIDEGLALNKTFVNMLKHQLFIPKRVGVLRWWMVSFGSLGAVIGIVFHFDRDHIMR  
LAVSGDTKVS KVTPEEEEEQKDISVIGQAQEP AKVNI-

>HarmSNMP2

MLGKHSKIFFGVSMIFLVIAIVLASWGFQKVVNKQIQKNVQLSND SKMFDRWVKLPIPLD  
FKVYVFNVTNVEEVNRGEK PILKEIGPYVYKQYREKTILGYGPNDTIKYM LKKHFEFDPE  
ASGSLTEDELTVVHFSYLAALLTVHDMMPSLVAIVNKALEQLFPSLDDAFLRVKVRDLFF  
DGIYLS CDG DNSALGLVCGKIRSEMPPTMRQAEGSNGFYFSMFSHMNRSESGPYEMIRGR  
DNVYELGNIVSYKQENMPMWGDKYCGQINGSDSSIFPPINENNVPKKIYTFEPDICRSVY  
ADLVDKREL FNISTYYYEISETAF AAKSANPNRRCFCKKNWSANHDGCLLMGLLNLMPC

QGAPAIASLPHFYLGSEELLDYFQSGVQPDKEKHNTYVYMDPVTGVVLSGVKRLQFNIEL  
RQIDTIPQLKTVPPTGLFPMLWLEEGATIPESIQQELRDAHKLKLSYVEVAKWFLLTIAIIAVIAS  
AVAVARANALLSWPRNSNSVSFILGPSVTQVKNKN-

>HassSNMP1

MQLPRELKYAAIAGGVALFGLIFGWVLFPTILKSQLKKEMALSKKTDVVRKMWEKIPFALD  
FKVYIFYFTNAEEVQKGGATPILKEIGPYHFDEWKEKVEVEDHEEDDTITYKKRDVYFNPE  
MSAPGLTGEEIVVIPHFMLGMALTVARDKPAMLMNIGKAMNGIFDDPPDIFLRVKVLDIL  
FRGMIINCARTEFAPKATCTALKKEGVSGLVLEPNNQFRSIFGTRNNTIDPHVITVKRGITN  
VMDVGQVVAVDVGKTEQTIWRDTCNEFQGTDTGTVFPPFVPETERIESFSTDLCRTFKPWYQ  
KKTSYRGIKTNRYIANIGDFANDPELNCYCSKPDTPPKGLMDLAPCMKAPMYVSLPHFL  
DSDPALLTKVKGLNPDVTQHGIIDYEPITGTPMVAKQRIQFNIQLLKTDKLDFKDLSDGI  
VPLFWIDEGLSLNKTFFVNMLKHQLFIPKRVVGVLRWWMVVSFGSLGAVIGIVFHFDRDHIMR  
LAVSGDTKVSXKVIPEVEEQKDISVIGQAQEPKVN-

>MsexSNMP1

MRLARGIKYAVIGAGVALFGVLFVWVMPAILKSQLKKEMALSKKTDVVRKMWEKIPFAL  
DFKIYLFNYTNPEEVQKGAAPVKEVGPYYFEEWKEKVEIEDHEEDDTITYRKMMDTFYFR  
PELSGPGLTGEEIIMPHVFMMSMAITVYRDKPSPMMNMLGKAINGIFDNPSPDFMVRNA  
MDILFRGVIINCDRTEFAPKAACTAIKKEGAKSLIIEPNNQLRFSFLGKNHTVDSRVVTVK  
RGIKNVMDVGQVVAMDGAPQLEIWNHDCNEYQGTDTGTFPPFLTQKDRQLSYSADLCRS  
FKPWFQKTTYRGIKTNHYIANMGDFANDPELNCFCETPEKCPPKGLMDLTKCVKAPMY  
ASMPHFLDADPQMLENVKGLNPDMEHGIQIDFEPISGTPMMAKQRVQFNMELLRVEKIE  
IMKELPGYIVPLWIEGGLALNKTFFVKMLKNQLFIPKRIVSVIRWWLLSFGMLAALGGVIF  
HFKDDIMRIAIGDSSVTKVNPEDGEQKDVSVIGQSHEPPKINM-

>MsexSNMP2

MLAKHSKLFFTGSVVFLIVAVLASWGFVKIISTRIQKSIQLENSSMYDKWVKLPIPLIFKV  
YFFNVTNAEGINEGERPILQEIGPYVYKQYRERTVLGYGPNDTIKYMLKKNFVFDPEASN  
GLTEDDDVTVINFPYMAALLTIQQMMPASAVAMVNRALQFFSNLTDPFMRVKVKDLLFD  
GVFLNCDGDSPALSLVCAKLKADSPPTMRPAEDGVNGYFYSMFSHLNRTETGPYEMVRG  
TEDVFALGNIVSYKEKKSWSAWGDEYCNRINGSASIFPPIDENNVPERLYTFEPEICRSLYA  
SLAGKATLNFNISTYYYEISSALASKSANPDNKCCKDWSASHDGCLLMGVFNLMPCQ  
GAPAIASLPHFYLAASELLEFFQSGIAPQREKHNSHVYIDPVTGVVLSGVKRLQFNIELRN  
MPRVPQLQAVPTGLFPMLWIEEGAVMTPDLQQELRDAHALLSYAQLARWIIILAAIILAIIA  
TITVARSTSLISWPRNSNSVNFIIIGPMVNDKMR-

>MS|comp162080\_c0

MLGKHSKLIFAVSIGFLVVAIMASWGFQKVVDKQIQKSVQLENSLMFDKWLKLPMLD  
FKVYVFNVTNVEEVNKGKPILEEIGPYVYKQYRERTVLGYGPNDTIKYMLRKRFEFDAE  
ASGGLTEDDEVTVIHFSYLAALLTVHDMMPSLVGVINKALEQFFPSLEDAFLRVKVRDLFF  
DGIYLSCDGDNAALGLVCGKIKGDLPTMRMAEGSNGFYFSMFSHMNRSETGPYEMNRG  
RDNIYELGNIVSYKQEIIMPWGDKYCGQINGSDSIFAPINEANVPQKLYTFEPDICRSLY  
VDLVEKRELFNISAYYIESESALAAKSANHDNKCFCRKNWSANHDGCLLMGLLNLMPC  
QGAPAIASLPHFYLGSEELLEFFQSGIAPQREKHNSHVYIDPTTGVVLSGVKRLQFNIELRK  
IDTIPQLSSVPTGLFPMLWLEEGATIPDSIQQELRDSHKLKLYVEVARWLLLVAVIAVIASA  
VAVARANALLSWPRNSNSVSFILGPSVT-

>MS|comp162251\_c0



MLLPKELKYSIAIAGGVAVFGLIFGWVLPVILKGQLKKEMALSKKTDVRKMWETIPFALE  
FKVYLFNYTNAEEVQKGAKPILKEIGPYHFDEWKEKVEIEDHEEDDTITYKKRDTFYFNP  
ELSAPGLTGEEIVVMPHIFMLGMALTVNRDKPAMLMNVGKAMNGIFDNPPDIFMRVKAL  
DILFRGIIINCARTEFAPKATCTALKKEGVSGLIIEPNNQFRFSIFGTRNNTIDPHIITVKRGIQ  
NVMDVGQVVAVDVGKPEQTIWKGACNEYQGTDTGTVFPPFLTENDRIQSFSSTDLCRSFKPW  
YQKKTSYRGIKTNRYIANIGNFAEDPELQCFCDPDKCPPKGLMDLAPCIKAPMYASMPH  
YLESDPALLNNVKGLNPDINQHGIEIDFEPISGTPMVAKQRIQFNLQLLKTDKIDLFKDLSG  
DIVPLFWIEEGLALNKTFFVNMLKHQLFIPKRVVGVLRWWMVVSFGSLGAVIGIVYHFRDHI  
MRLAVSGDTKVS KVTPEEGQE QKDISVIGAQAQEPAKINI-

>PxylSNMP1

MKLPKHLKFAAGAGGAFLFGILFGWVMFPAILKGQLKKEMALSKKTDVRKMWETIPFAL  
NFKVYLYNYTNPEEVQKGGVPIIKEVGPYHFDEWKEKVEIEDHEEDDTITYKKRDTFYFN  
QEKSGPGLTGEEVITMPHFVFLAMATVVSREKPAMMNMIGKAINGIFDNPADVFIRVKAL  
DIMFRGTMINCARTEFAPKAVCTALKKEAVNGLVMEPNNQFRSFLGSRNGTIDPHVVTV  
KRGIKNVMDVGQVVAIDGKPPQDVWRDHCNEYQGTDTGTVFPPFLTEHDRLQSFSGLDCR  
SFKPWYQKKSFYRGITTHRYIANIGDFANDPELNCFCGDCPPKGLMDLMKCMKAPMYA  
SMPHFLDSDPELLKNVKGLNPDVNEHGIEIDFEPISGTPMVANQRVQFNMQLLKHDKVEL  
LNNLPDTIVPLFWIDEGLALNKTFFVNMLKFQLFYPPKAVGVIKWLLVTFGGFGLIGCTIYH  
YKDRIMSFASSPGSAAVTKVKPEEVEQKDVSVIGQPQEPAKINM-

>PxylSNMP1-like

MVISYPHFYTGEPARDRYVTGLQPDRDKHSSYVIVEPLTGTTPFRSVARMQSNLRIHDLSGF  
SSEYDKFSNLILPLFWAEYNQEGLPDYIRLTIYVMVVLPVSKALLSFFLLCGCYLIAKQI  
YTHKLKSESLSATLPFKNKNVNNLARNKLFNYEKETFLKKPS-

>PxylSNMP2-like

MLGKHLRLGFAISLVVLVIAILMAAWGFPKIVQTQIKKNIQLADGSLMFDKWKKLPMPLSF  
KVYVFNVTNPDVDSGERPRLQEVGPFVYKEYREKTILGYGENDTIKYTLKKTFFIDQEAS  
GSLTEDDVLTVLNFSYMGALLSVFEIMPGLIPMINQALGVMFQDLTDPFLRVKARDLFFDG  
IYLNCVGESSALGIVCGKIRADAPPTMRPSEDGNGFYFSMFHMLSEAGPFEMVRGTED  
VSQLGHIVSYKGKTSMNTWGDKYCGQLNGSDSSIFPPIDRIRVPERLYTFEPDICRGVVVLS  
TVAYVGNQTLNNEKFEHSPHLSFQSSQKLECEPRRLHKNAIHHSSLSNCPRNWSANHDGC  
LLMGLLTLMPQCQAPVIASLPHFYLA SEELLEFFDGGVKPDKEKHNTYVYLDPVTGVILE  
GVRRLQFNLELRNMKGVPQLENVPTGLFPLLWIEEGAILPQSVIDELQHSHTLLSYVEAVR  
WIVLGIAILAFLGLAIAVIRTGNIPIFPKQANSVSFILRPGSFNPTDAHKAQ-

>PxylSNMP3

MKFGVRSSAAVLAVGAVVAVAVAVAVGYAVVPGIIDEITILQEVALENNIALERFENVPFPLNF  
TIHLFSVENGPVLAGGIPRVRRERGPYIYKLYQTRVIEGFNEDTISYRFLQTYEFDKEASFPN  
TEDDRVTIANVAYHSVLQVAEQLAPTLLGALSALDSVFGRELNSPLATVRVGDVDFDGP  
LCRGGGLLASVACAVIRDAAKDIPNMEVQPDGSLVFSLFAHKRDKLGELYKVDRGLQDPL  
ALGSILQWNQRDFLPNWAGGPLSQCARLNGTDTGIFPPFIKRDTVLYGFNTDICRSVELRY  
QYDTQYSGVPAYRFAANDWFLSNREGCFCLNVTAGVTAPDGCLLHGAQEMYSIEPTLG  
YLVCAKDKDYIISGHSILTDDSYSISRVEALGGGWHTTSSPVAVKSNRGTALSPTIEIAGSYLV  
LTYPHFLFAHPTYANMVVGMTPDLERHRIFLDLEPVSTPYFLRKV-

>TcasSNMP2

MGCSCCTIKVLLVCVVISVALLIVSLALAFKVFDPDLLESEVNKAVRLEDGTKQYDRFVELP

FPVDFKVYLFNVSNPQQVLDGTEKPKLEEIGPFVYKQYRKKTILGKNEEEDTISYTQKETF  
EFDAAEASKPLTEESVVTVLNPALMSIYQLAEDLHLAGAADTCIKQTFENNQGKVFIEANVR  
KLLFDGFSFCNKNTSPGICGLVNDLCAIAATKRNSDLVLPDYSLIFSYLNYKRKPDDGKYTV  
KRGLTNIKLGHIVAWNDSLYTKFWGEGTTCSEVKGTDSTLYPPRVTTDSAFYIYSTDICRF  
VKINYKGEESYKGIDGYLFETSEDTLRSSAPEEDCYCSKLSRDMEGKKSCFLDGVIDMQT  
CFGVPVLFSPHFLWADNKYLSAVEGLNPVEEKHKTYLVVEPNTGTPKGMKRIQLNGVI  
RPVIGIKSMLQTKRALLPLLWIEEGVSLPQKYVDELKSSYFDKVVQIVDGVRYALIVISAILV  
GAFGIILRKRSHAKHHV-

>TcasSNMP1a

MRLPVKIAIGCAIGLVVIVFGFIAFPKMIKGVKSMINLNGSEIRQMFVKVPFALDFKIY  
MFNVTNPMQVQKALPVLKEVGPFCFEEWKEKVDLDDNDDDEDVMFYNPKDTFYKANG  
PGCLDGSQMITMAHPLILGMVNTVVRTKPGAISLISKAINSIYGNPDSIFMTASAMDILFDG  
VVIKCGVKDFAGKAVCSQLKEAPDLRHVDENDLAFSFIGPKNATPGKRFKVLRGVKESH  
VGRILEYDNKKEMEVWPTKECNQYKGTGTVFPPYLTKEEGLASYAPDLCRSLVAVYSG  
DTKYDGIPVRIYTATLGDMSKNADEKCYCPTPDTCLKKGMMDLFKCAGVPVYVSLPHFY  
ESDES YVKG VVGLNPNKKDHGIQILFESTTGGPVKAAKRLQFNMPLEPNPKLPIFANLNT  
VLPLFWVEEGVALNNTFTKPLKDLFKIMKIVKIAKWLIMLGCLGGLGAAGYLYFSKKGEA  
NITPVHKVKAENGVSTLGGEVNHAMS DNEIEKY-

>TcasSNMP1b

MVKWQRQLKPGNEVRDFYIKLPIPLDFRVYFFNISNPEEVKQGEKPIKQIGPYCYDAYKE  
KINVEDDKDNDTLTYNPDYTYFFNQMRGTGDLSDDDYVTILHPLTVGIVNAVATQKPQYLS  
AVNKALPVIFKENS SIYLTAKVREILFDGVLINCNVKDFSANAVCSQFKGQPAMVEVEKNI  
YSFSLGSRNGSIPTRITIRGVKNAADIGRVVTIDNKTDLVWPEPECNAFRGTDGWVFP  
SFLEKEDGIWTVASDLCRSFKAQYVEDLKFHGVVVRKYFADLGDMSNPAEKCFCAPEK  
CLPKGVM DLTCKMKVPLYCTLPHFLRADEKLLQQVEGLSPELERHIIKIYFEPLTGT PMLG  
QRRIQFNLQLMPIPKVAMMKT VPEALHPILWIEEGVELEGFLLKKVTSVFTLLKLMTFVRY  
IMLGLSIQGILYGGYKLYQESKSKVSPVQNGTTESKNHNQGKTGGIELPSMNKR NKENT  
KNA-

>TcasSNMP1c

MSYKKITIIISACCVVTIIGVAYIYAIRDISHRRNVRYKYIDRVNNSNDVNGGVVSVGYCYD  
YKRIDVDNADSTYTYDIYNRSGNSDDYVTIIHVVSVNYVSVKTHYNDAGKSITAKVRDID  
GMINCTSRDTAMAVCTIRTIGISKDYKYAGNGTTRITVRGIKSNGKVAVDNVTKSDWSNC  
NYKGTG DWISGRKTIWMHATT CNIHADV GATSNGAVNKY YSDNICTNCSGIDVTKCTAI  
YISHRSDSIRGVKGNDSHITRIGTSM AIRNVVKKITIMNVSVIHVWVMGVVNGWRMIKT  
YTAVMKYISVASGTAYGGYHYKNKKYSKNIVSSK-

>TcasSNMP1

MTSTARRRNIMKKVYKIMDRVYNITNSVNGVVKVGYCYDAKKIDVNGDSTYTYTYNDK  
SGRTADDYVTVHIVGIVNTVSRDSIVDRAIKSIKDNIYITTKVRDDGMTINCKVDSATAVCT  
KAIGIKNVYKSIGRNGTNRKYVRGMKKWHGRVVNHKSTVWSTKCKNRRGTDGWIIDK  
VGWTYSSDCRNMHVVTSHGVAKY YADGDMSSNDKCYCKTCKGMMDTRCMGVYIATHR  
VDKVRRTVRGKITDHIVRVIIGTAKRMNIVKKISMKTAHIWIAIVGKMIKVVVAKVDVVK  
YCAVCAVAGSYCYKRKKKAVTVSKTAKA-
